# Supplementary material for: A member of wheat class III peroxidase gene family, TaPRX-2A, enhanced the tolerance of salt stress
Source: PubMed Central journal article supplement (PMC7449071; doi:10.1186/s12870-020-02602-1), 2020-08-26

### T.ae class III peroxidase I subfamily exon-intron and prx domain diagram (part 1)

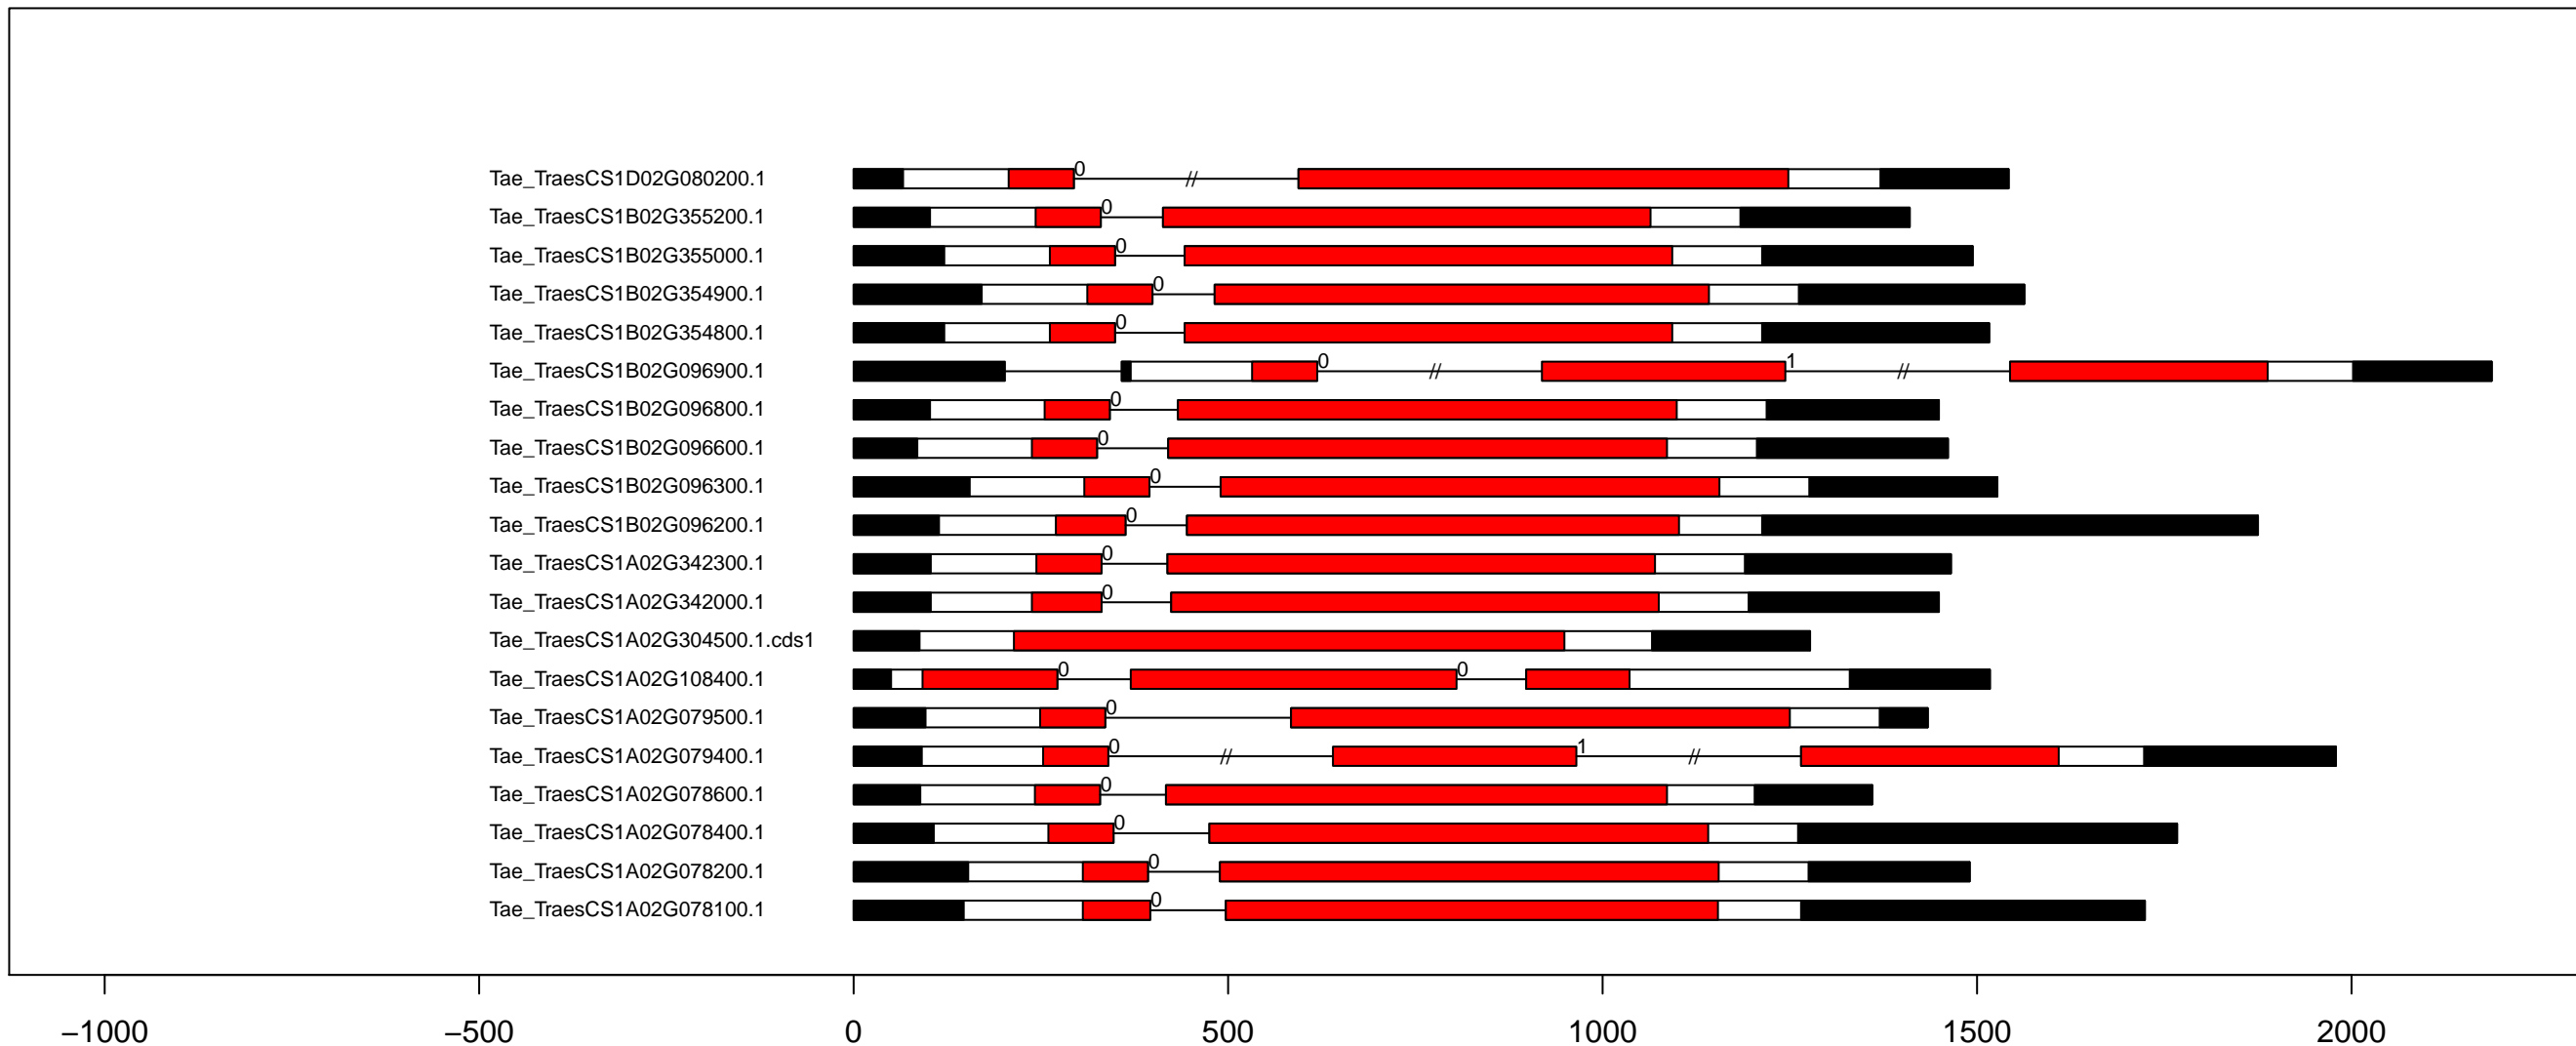

### T.ae class III peroxidase I subfamily exon-intron and prx domain diagram (part 2)

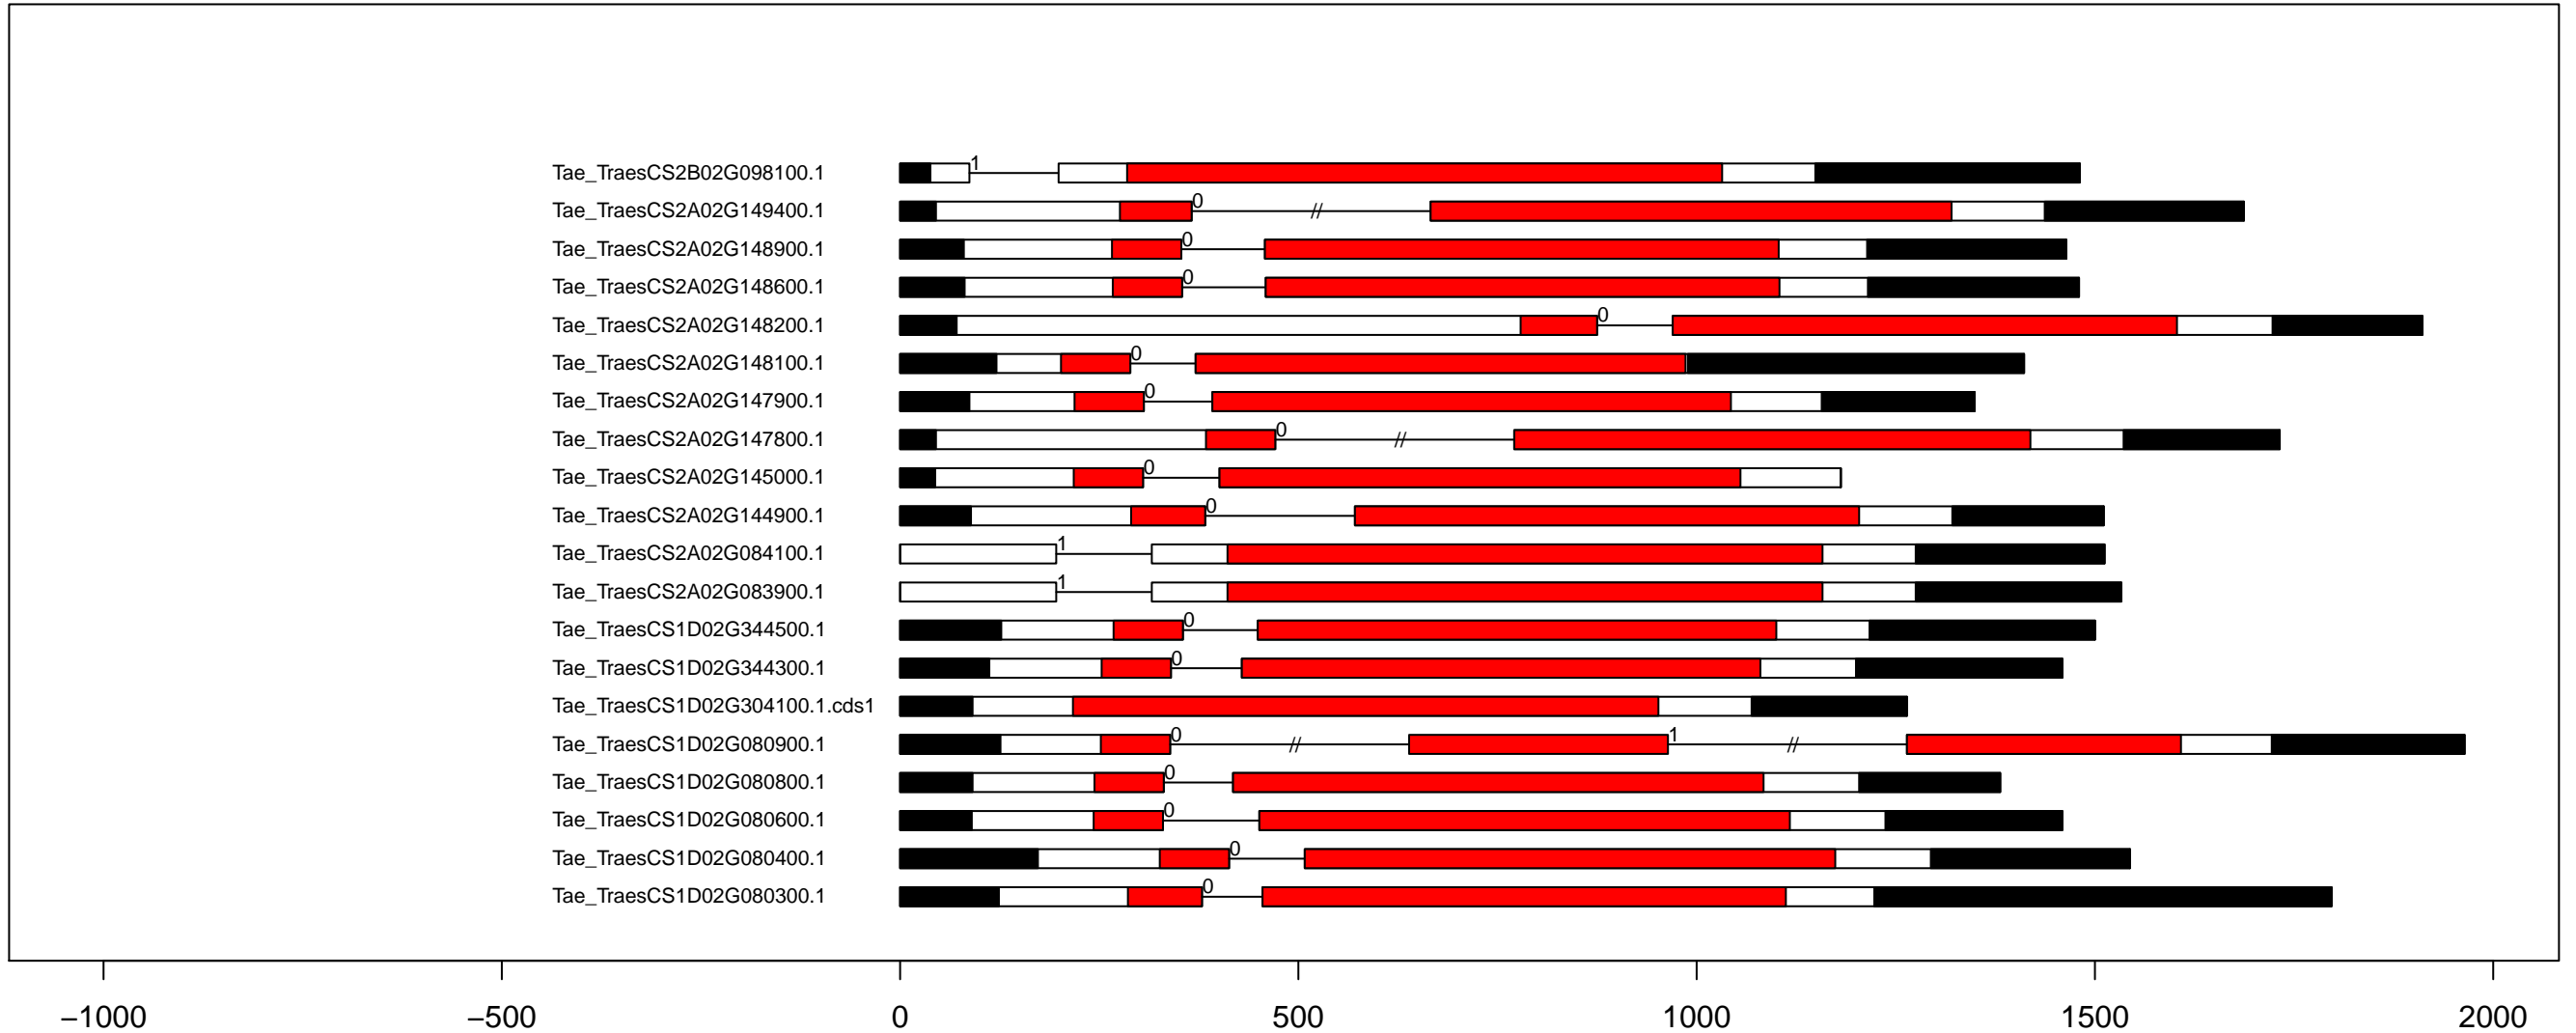

### T.ae class III peroxidase I subfamily exon-intron and prx domain diagram (part 3)

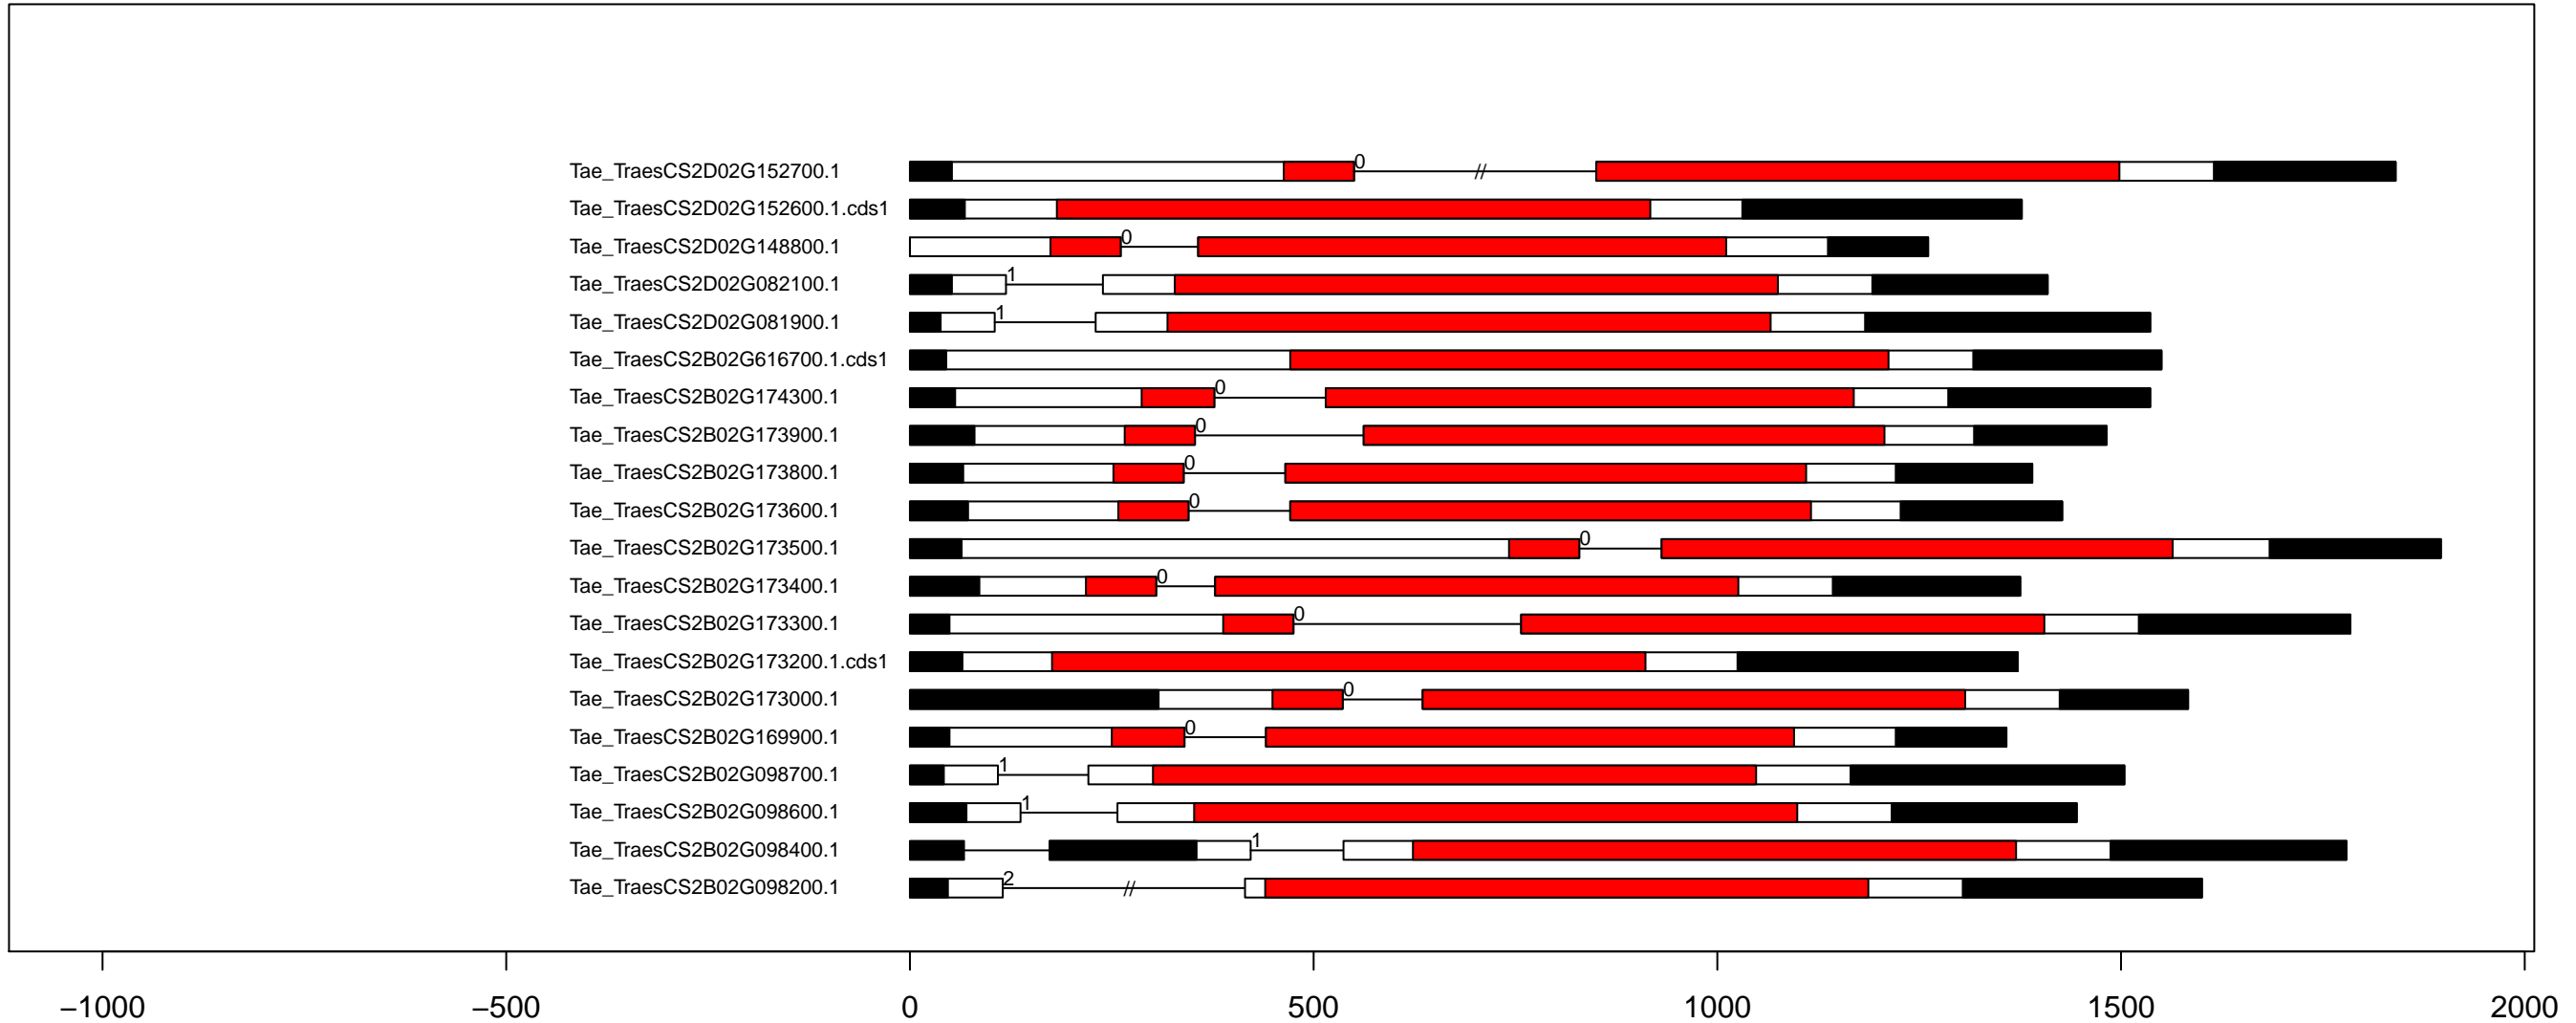

### T.ae class III peroxidase I subfamily exon-intron and prx domain diagram (part 4)

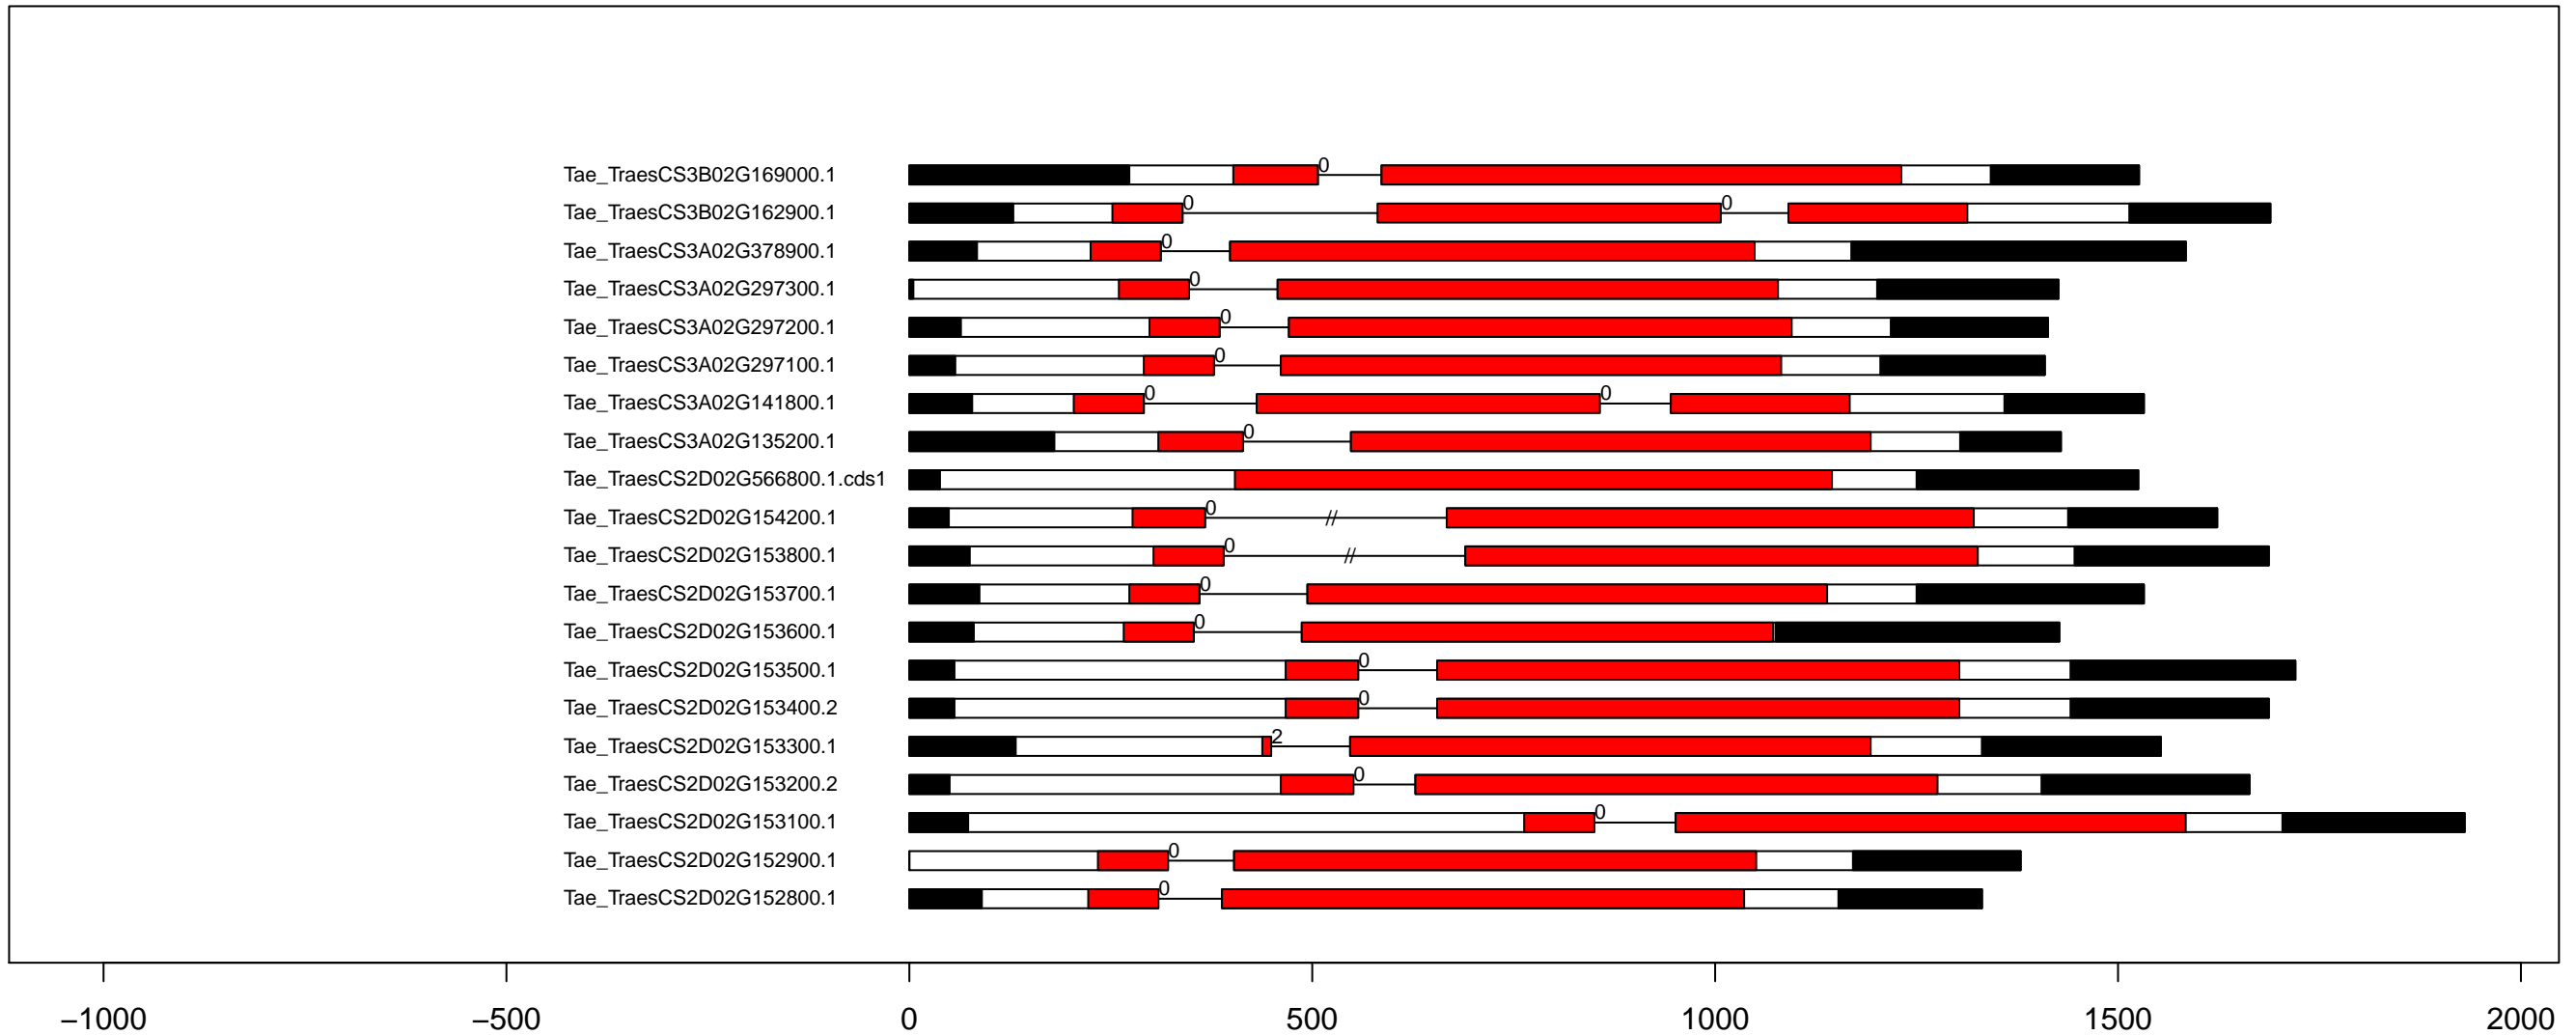

### T.ae class III peroxidase I subfamily exon-intron and prx domain diagram (part 5)

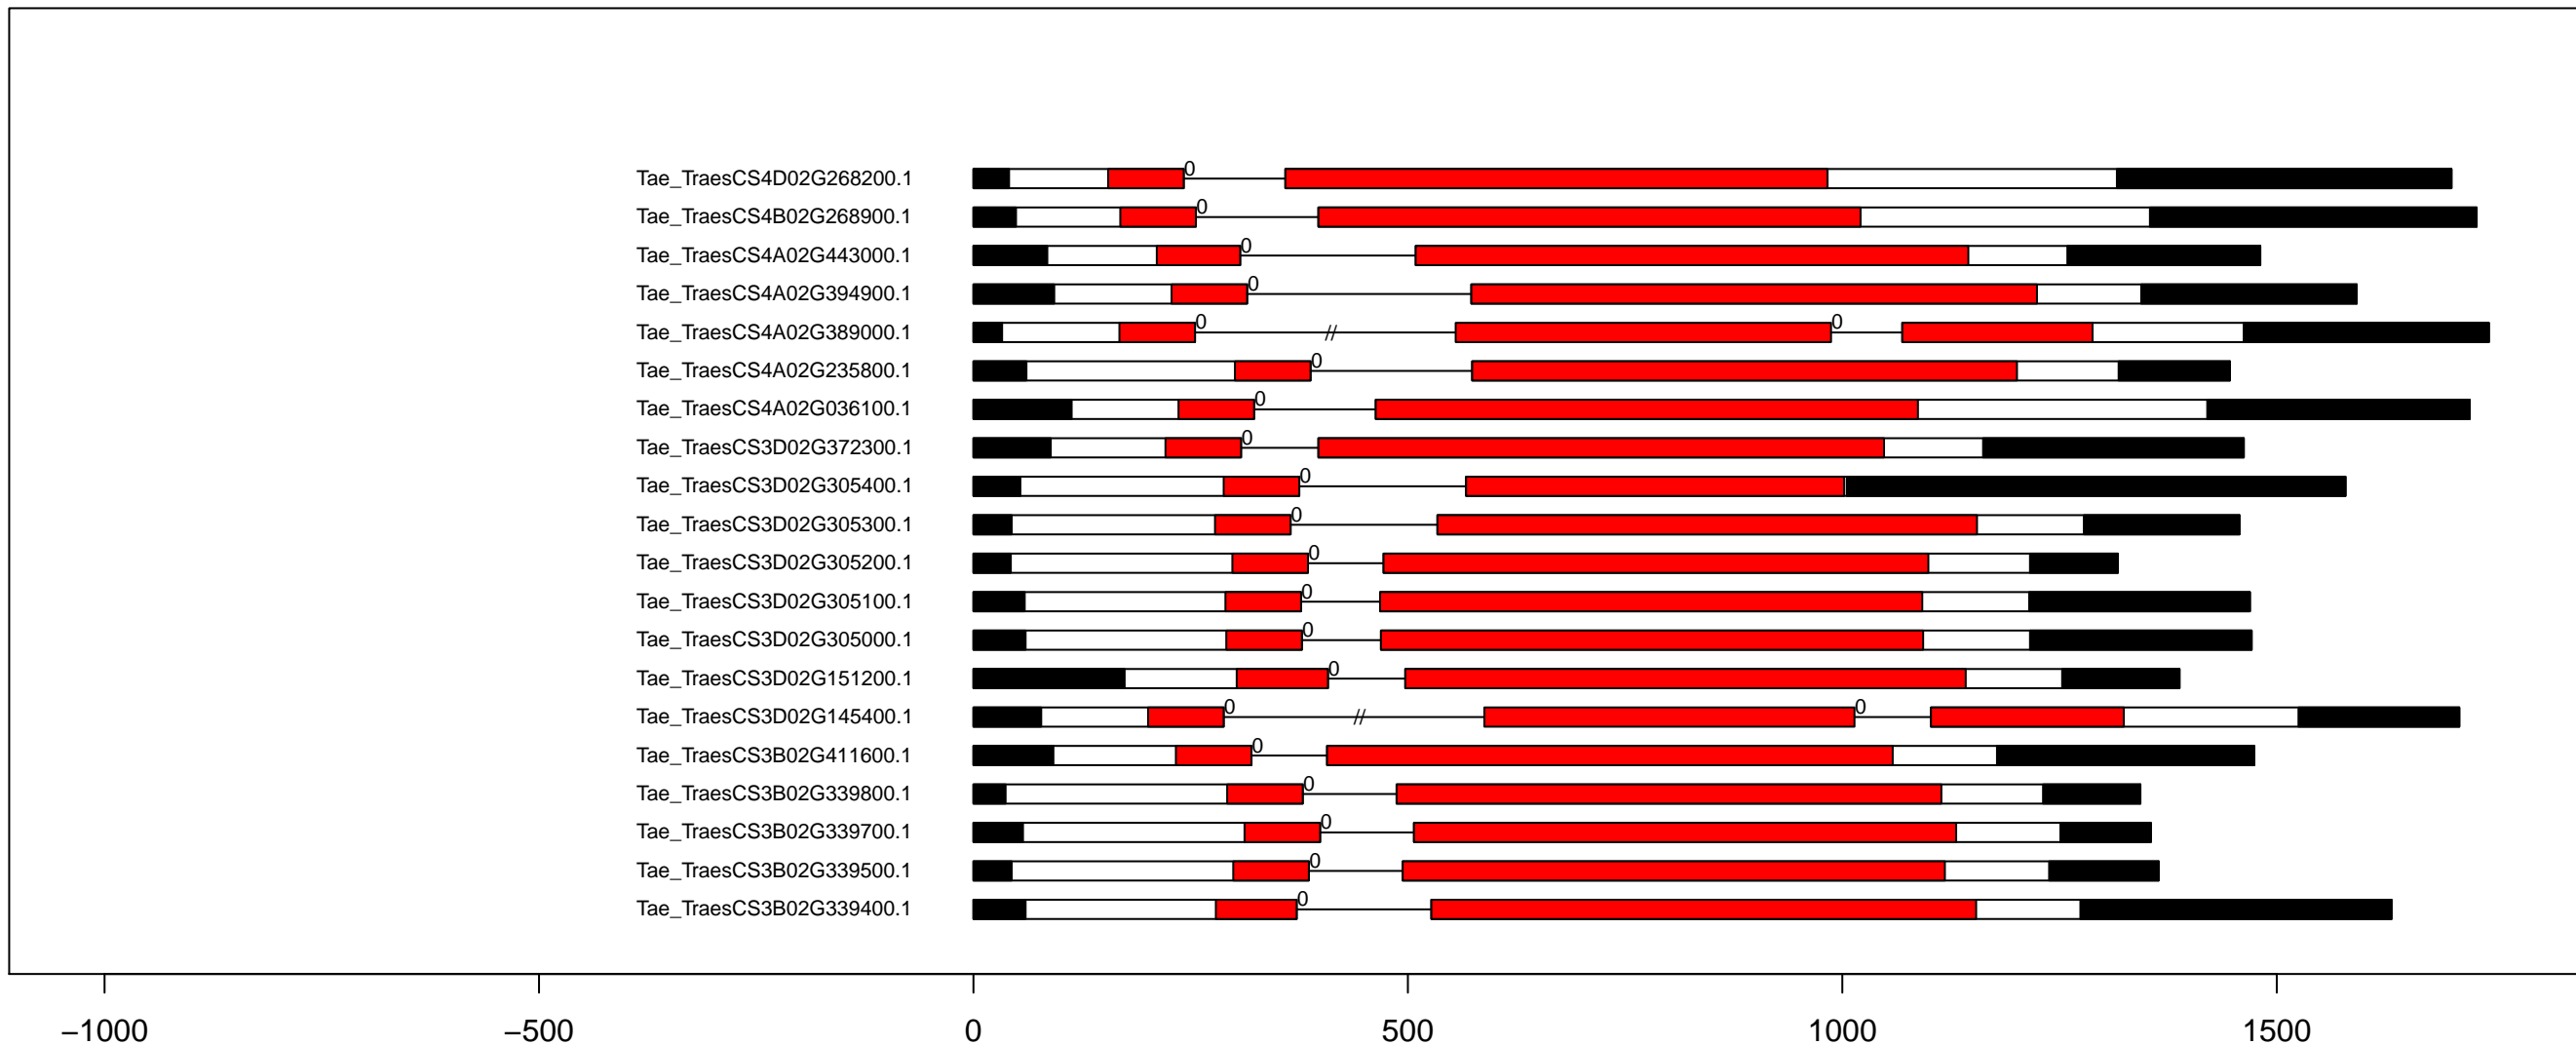

### T.ae class III peroxidase I subfamily exon-intron and prx domain diagram (part 6)

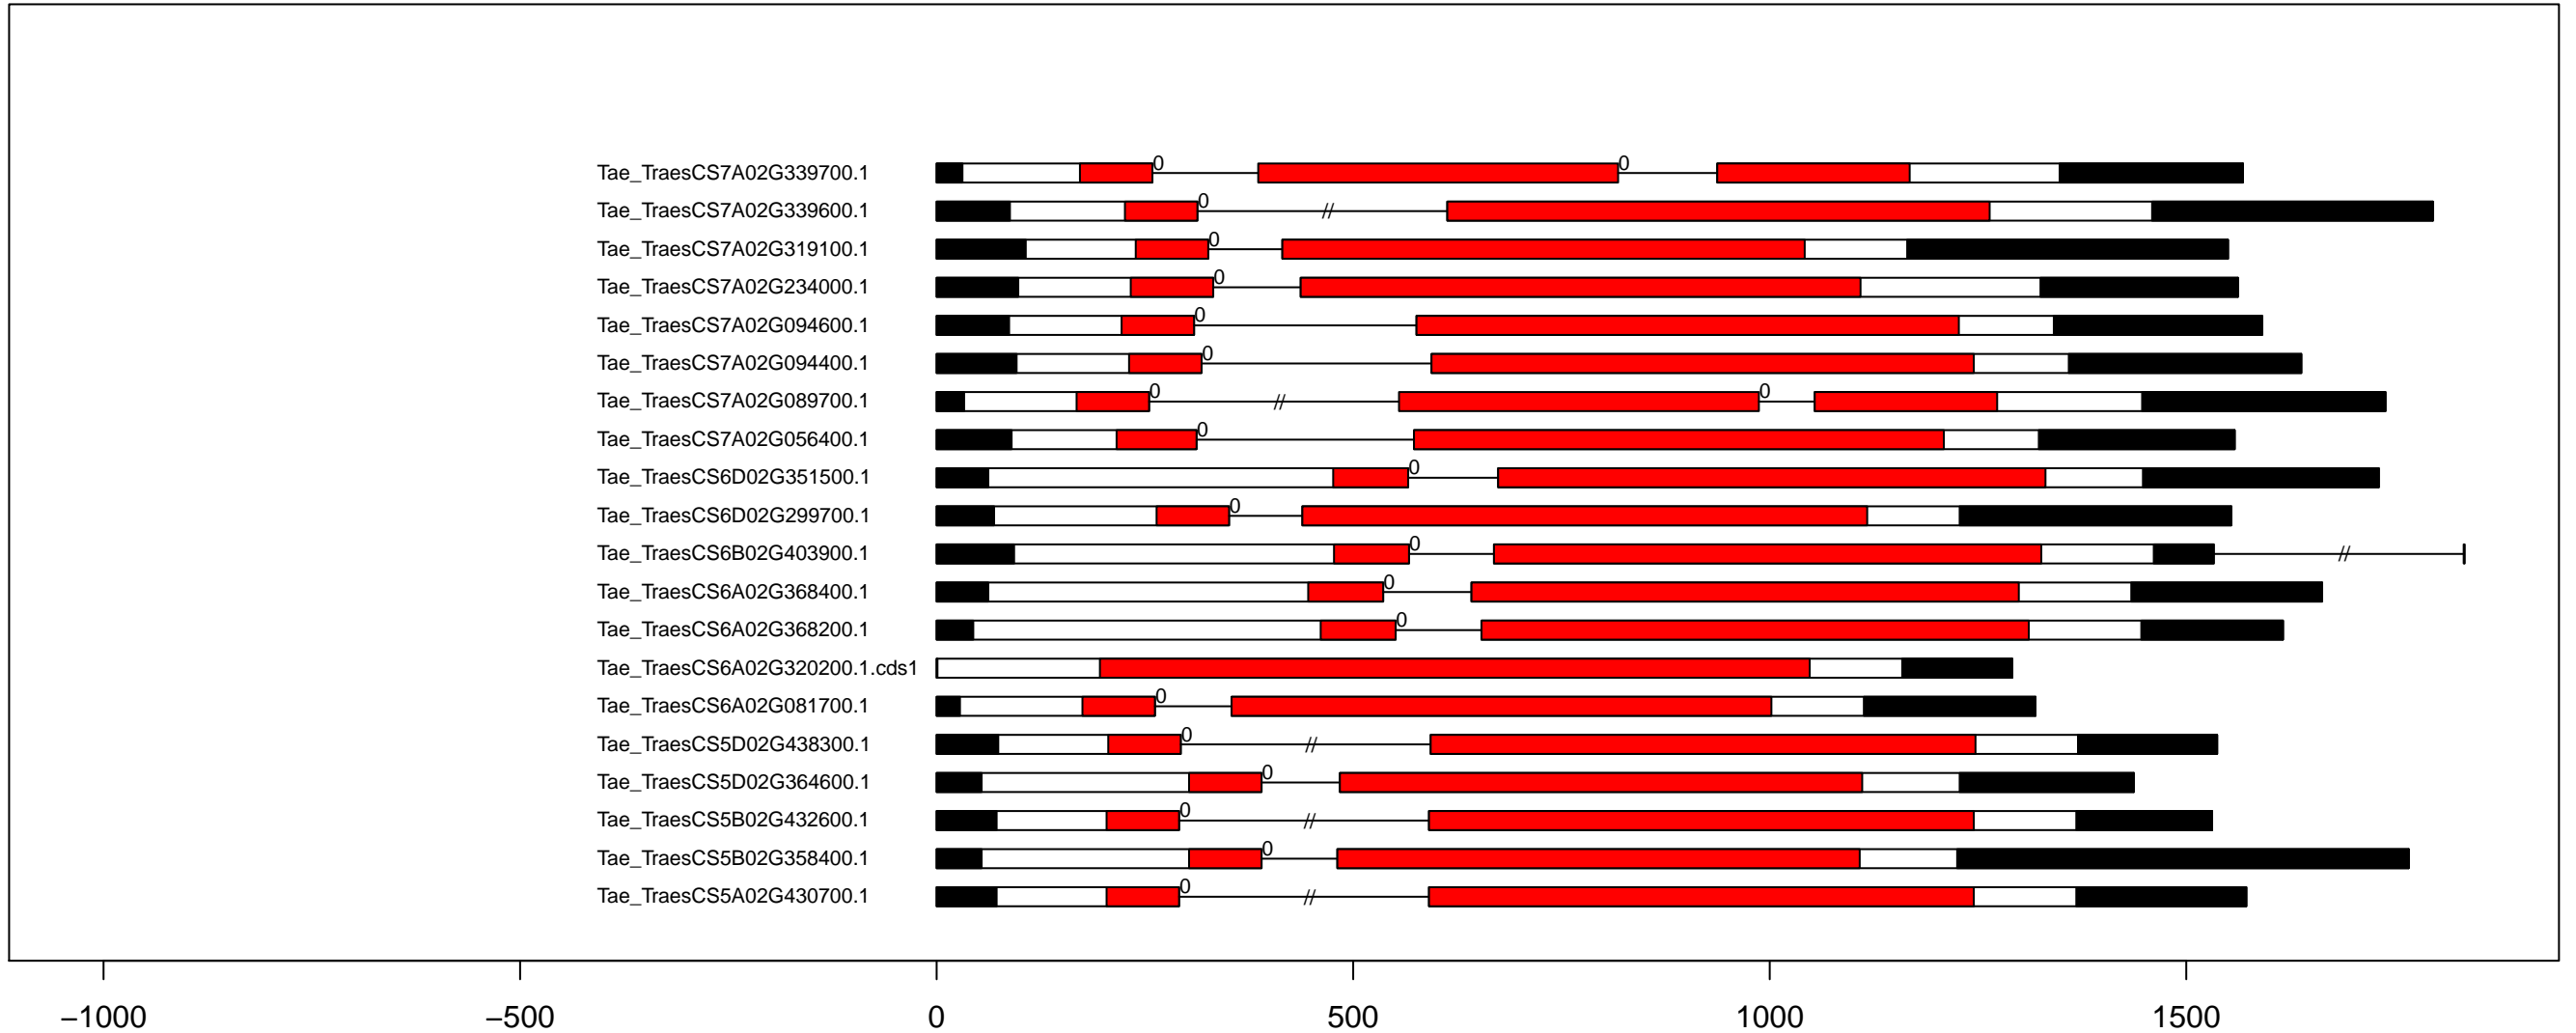

### T.ae class III peroxidase I subfamily exon-intron and prx domain diagram (part 7)

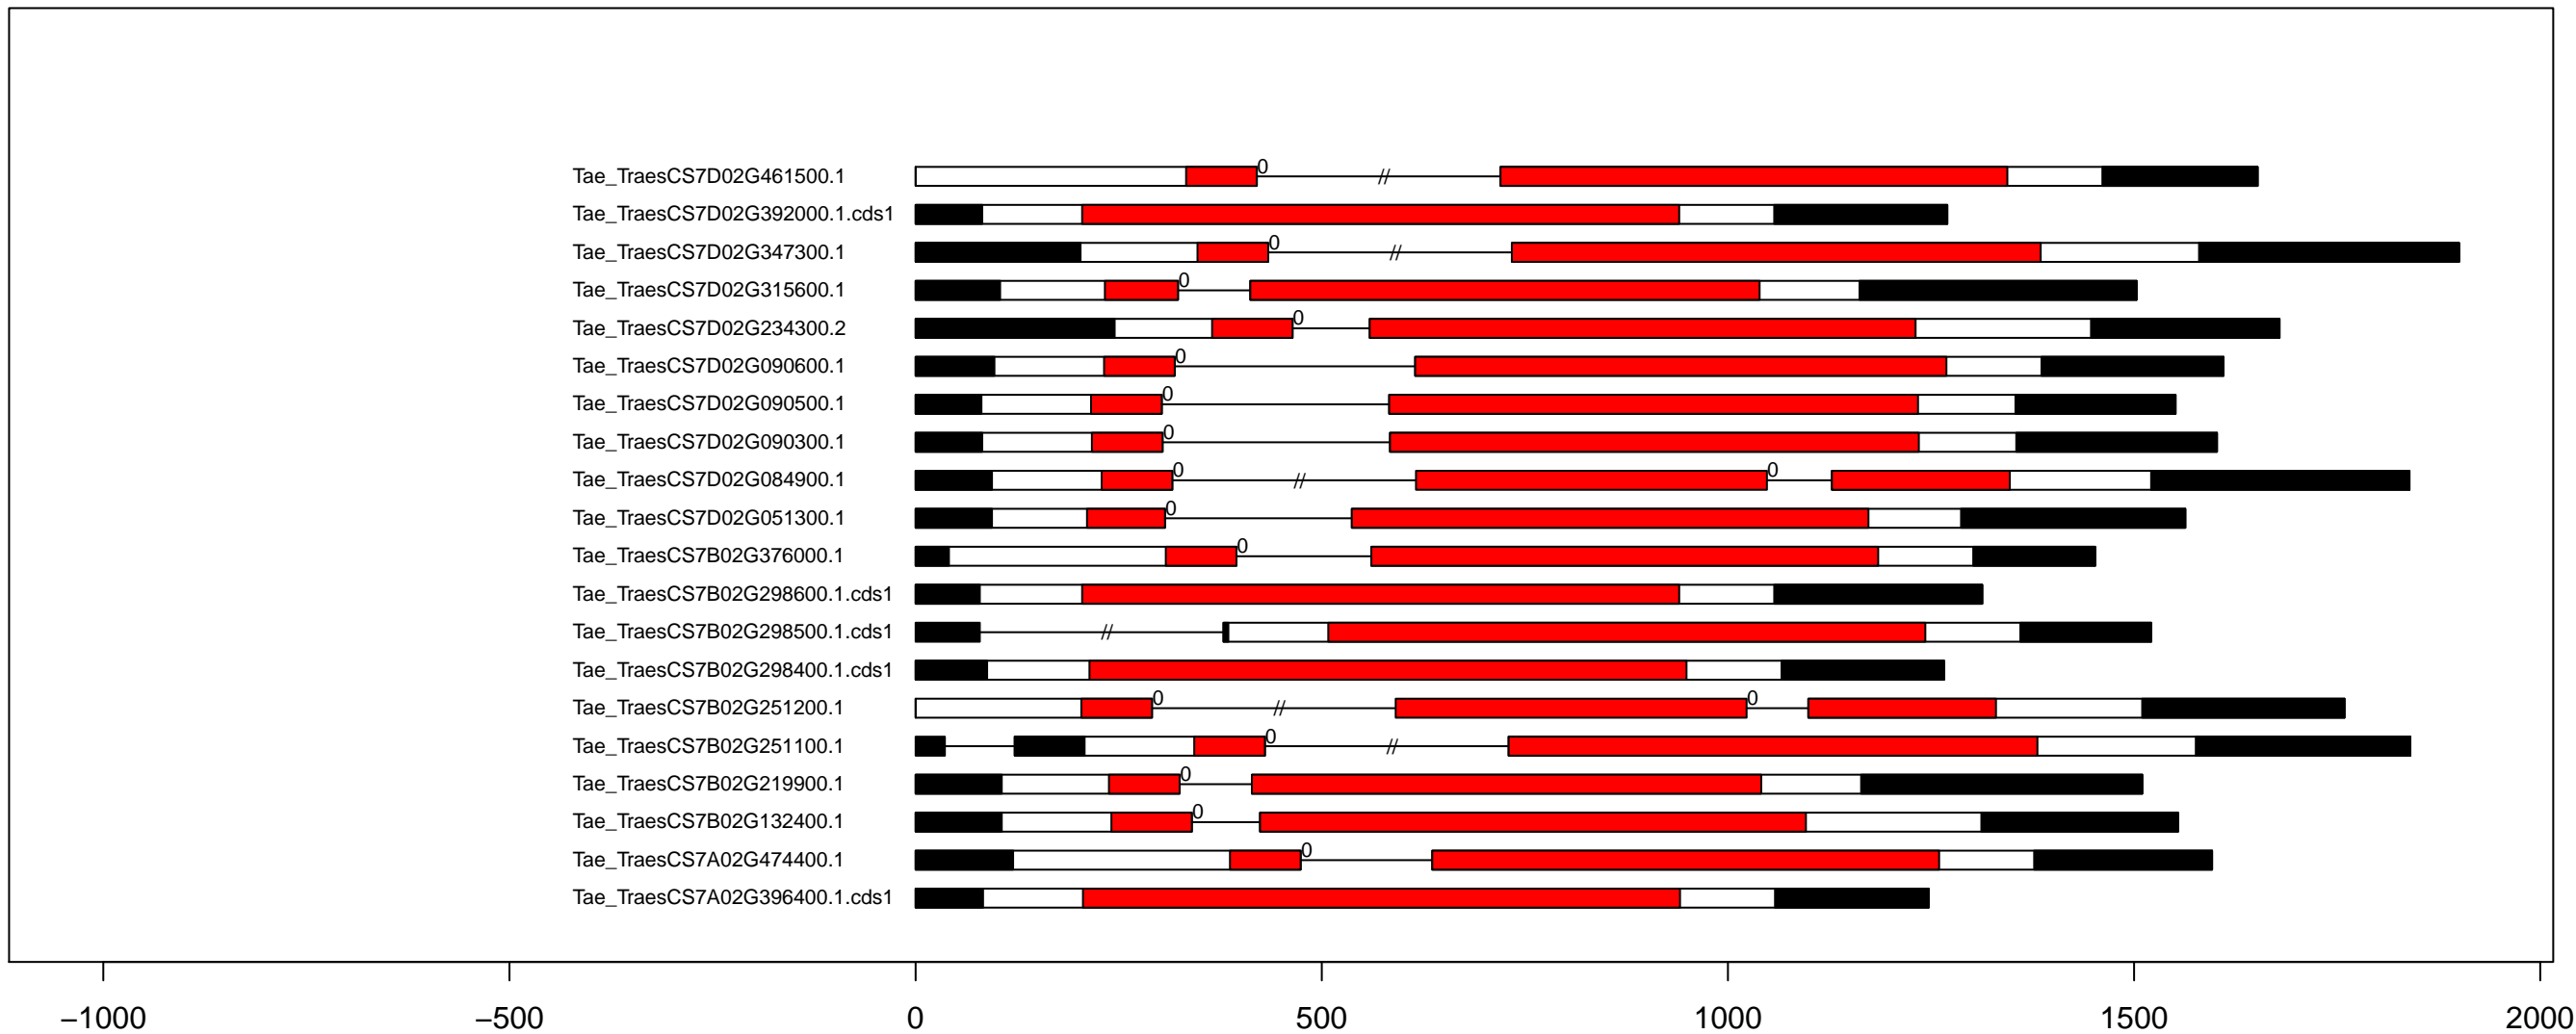

### T.ae class III peroxidase I subfamily exon-intron and prx domain diagram (part 8)

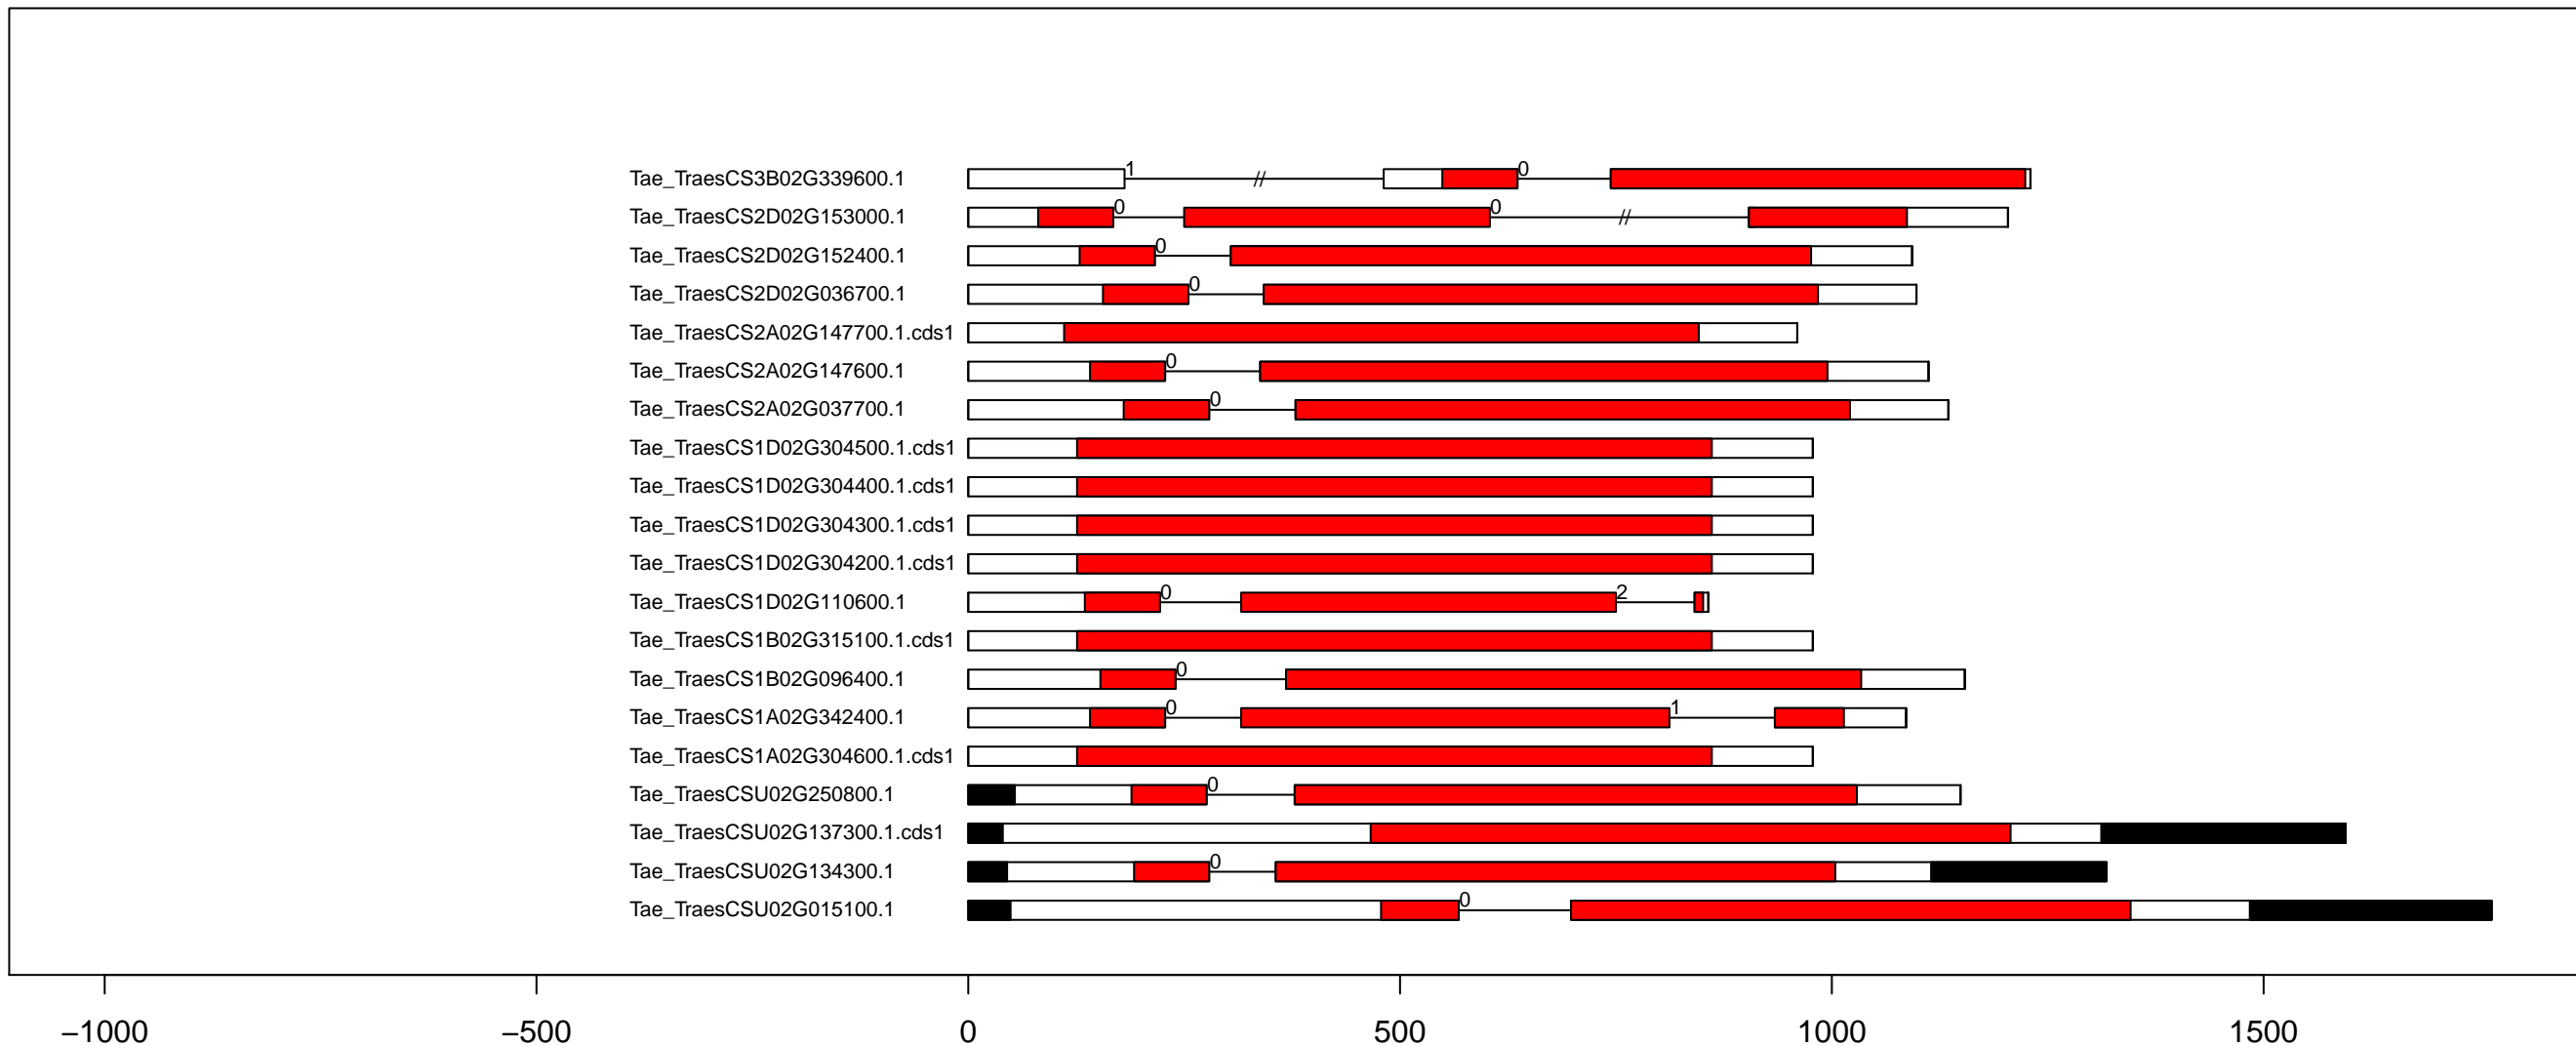



# T.ae class III peroxidase I subfamily exon-intron and prx domain diagram (part 9)

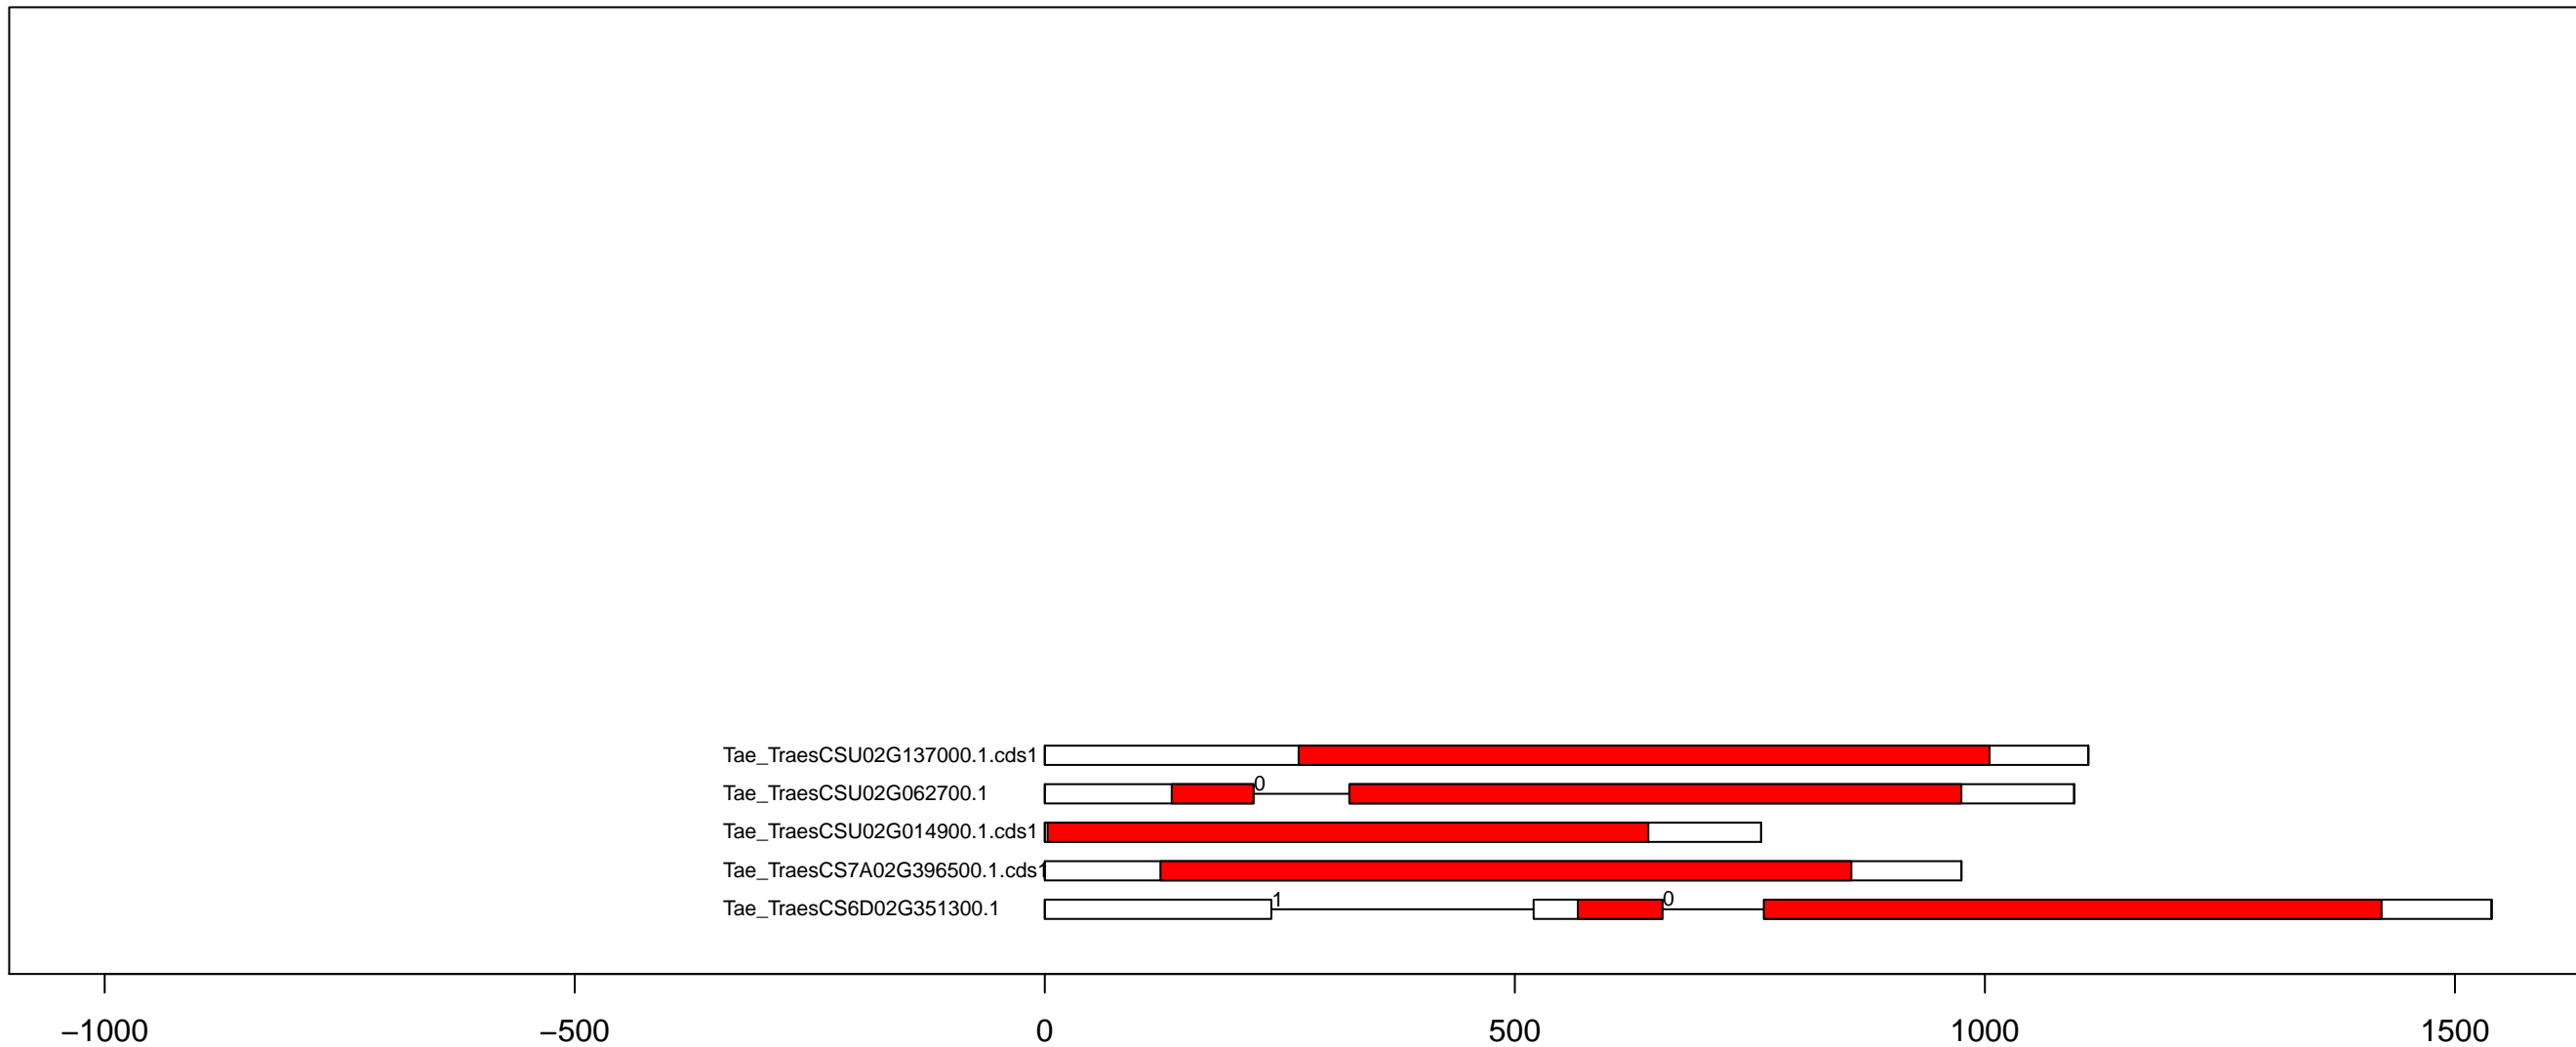

### T.ae class III peroxidase II subfamily exon-intron and prx domain diagram (all)

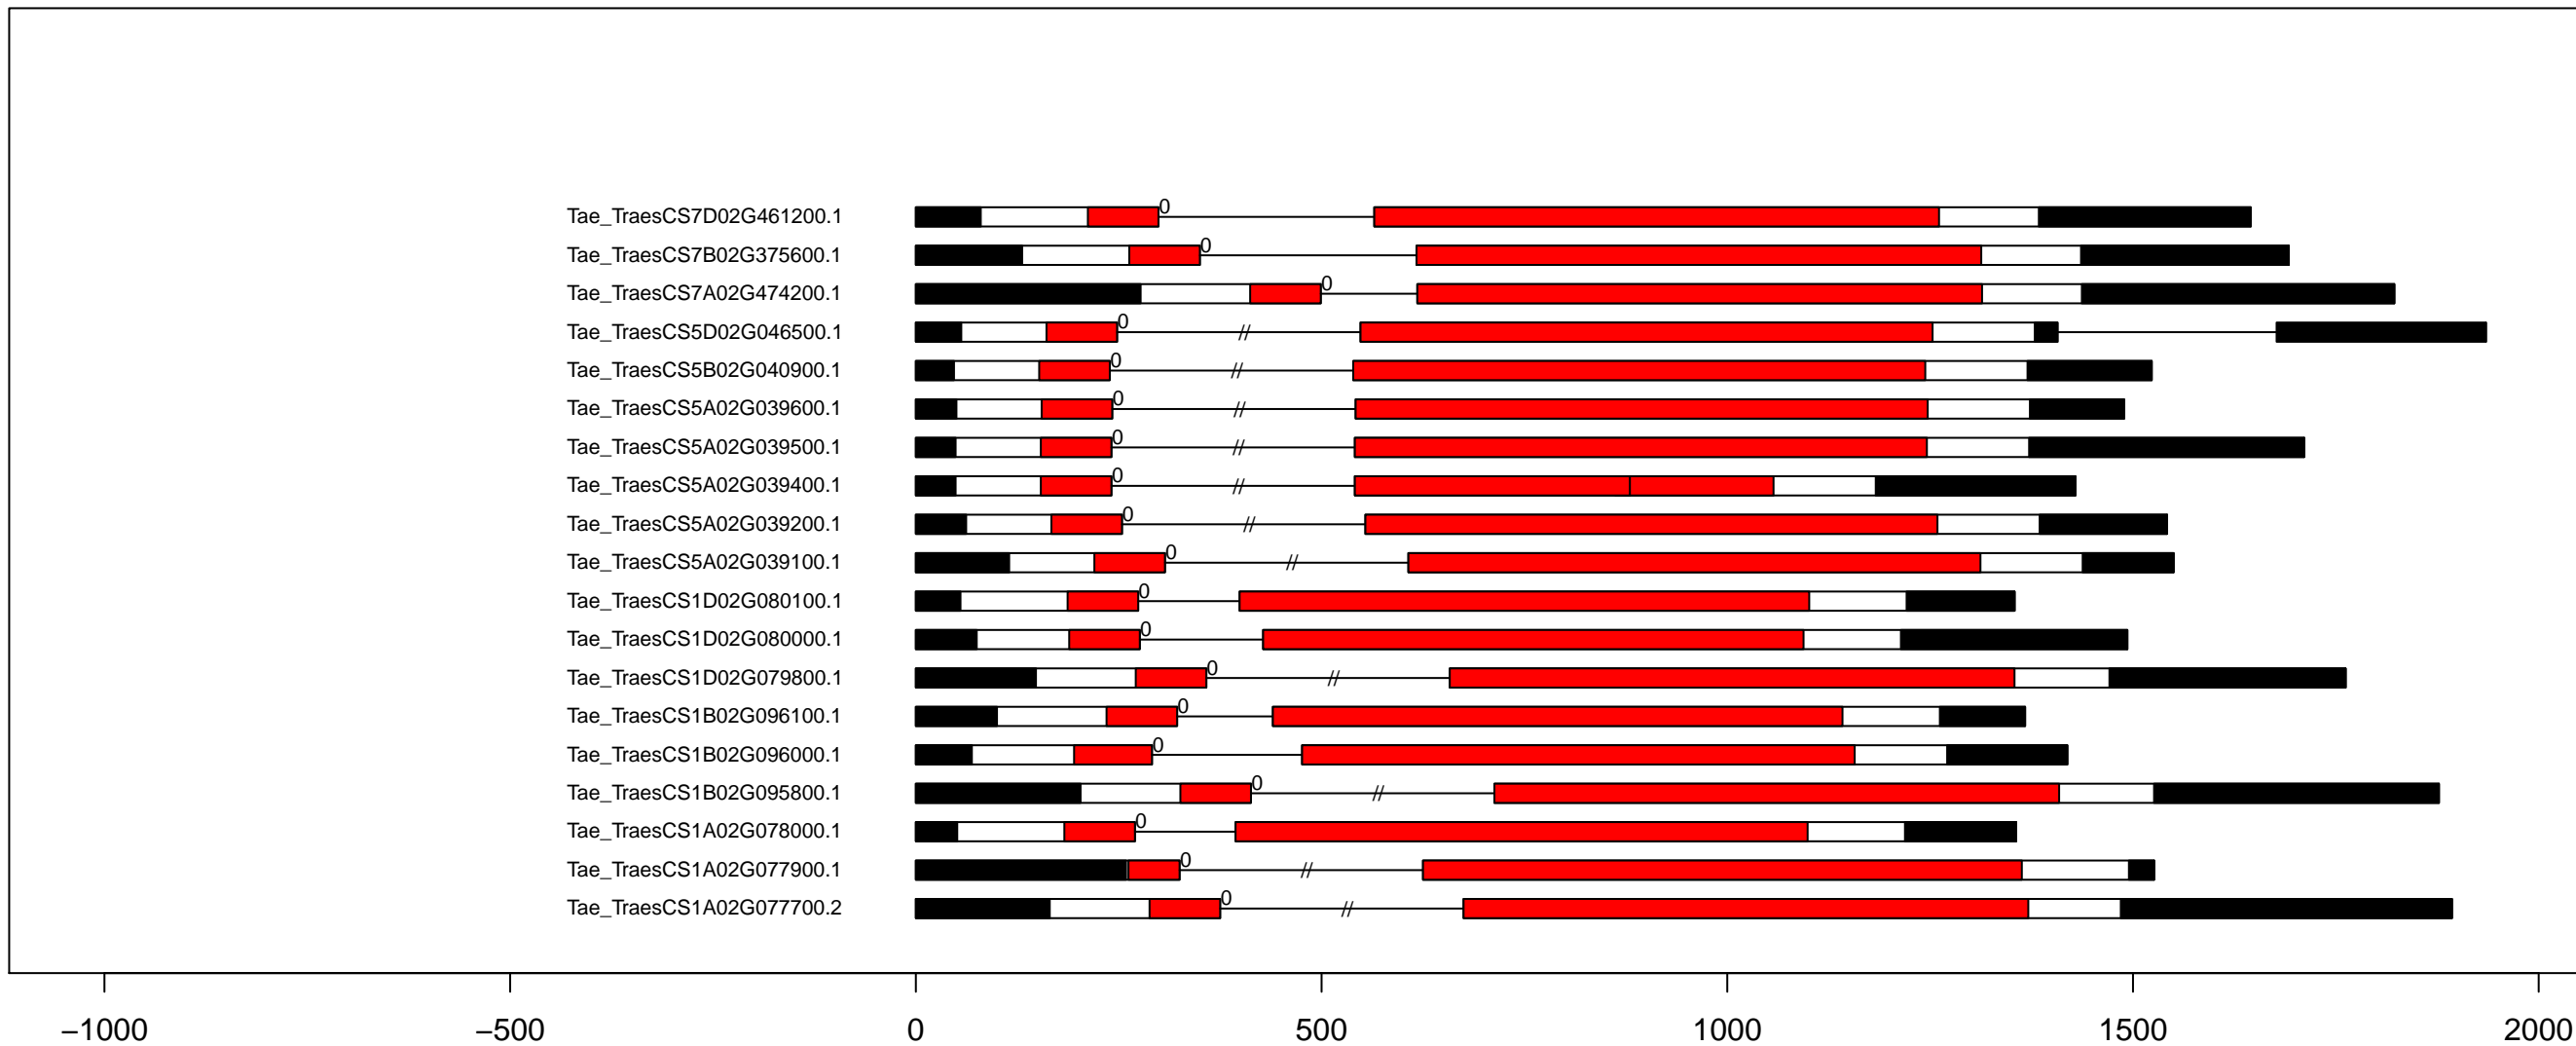

### T.ae class III peroxidase III subfamily exon-intron and prx domain diagram (all)

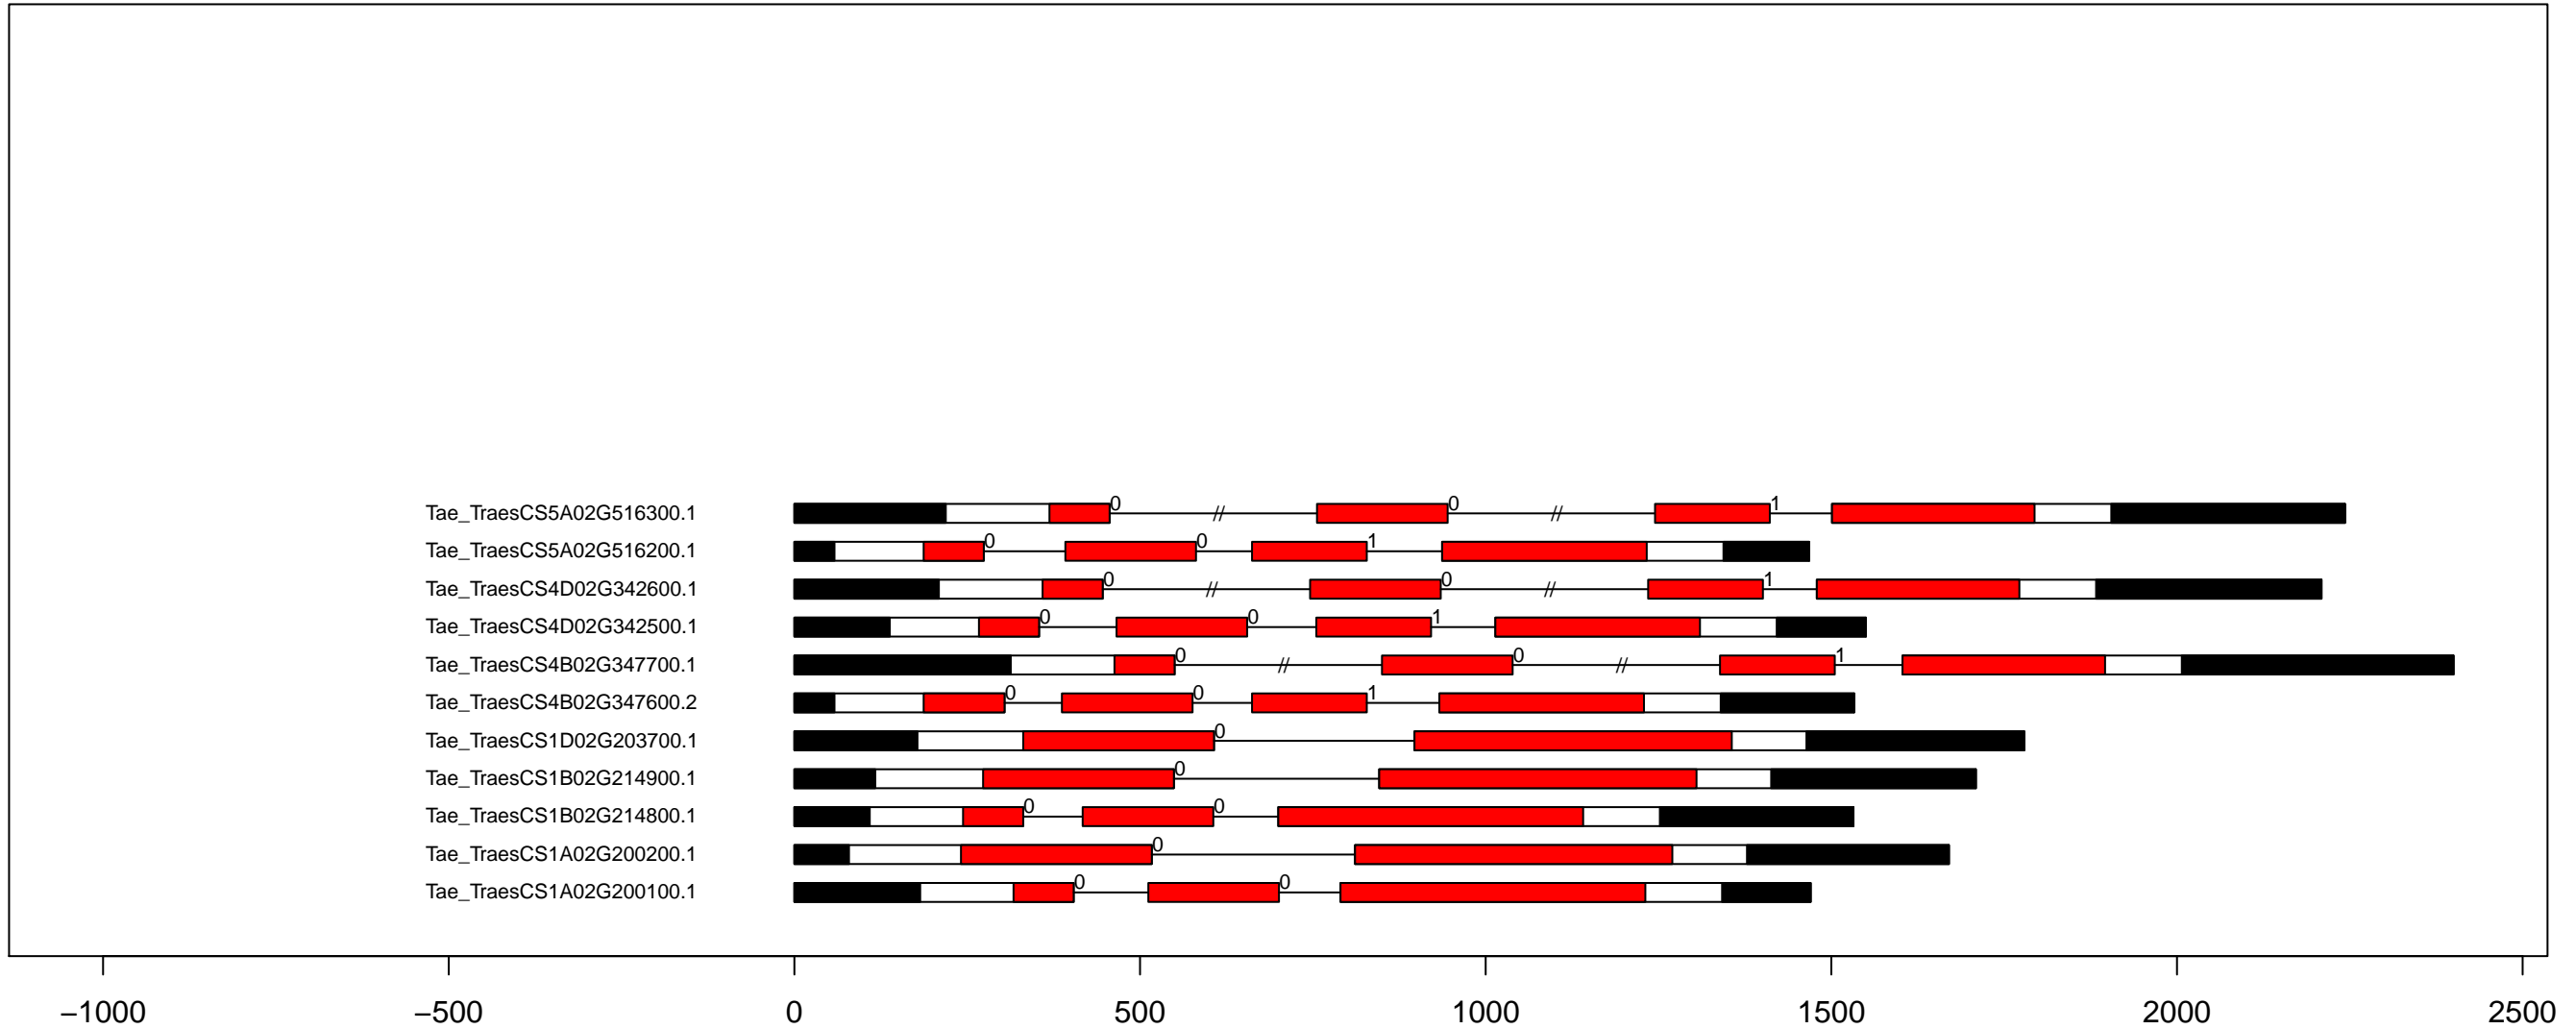

### T.ae class III peroxidase V subfamily exon-intron and prx domain diagram (part 1)

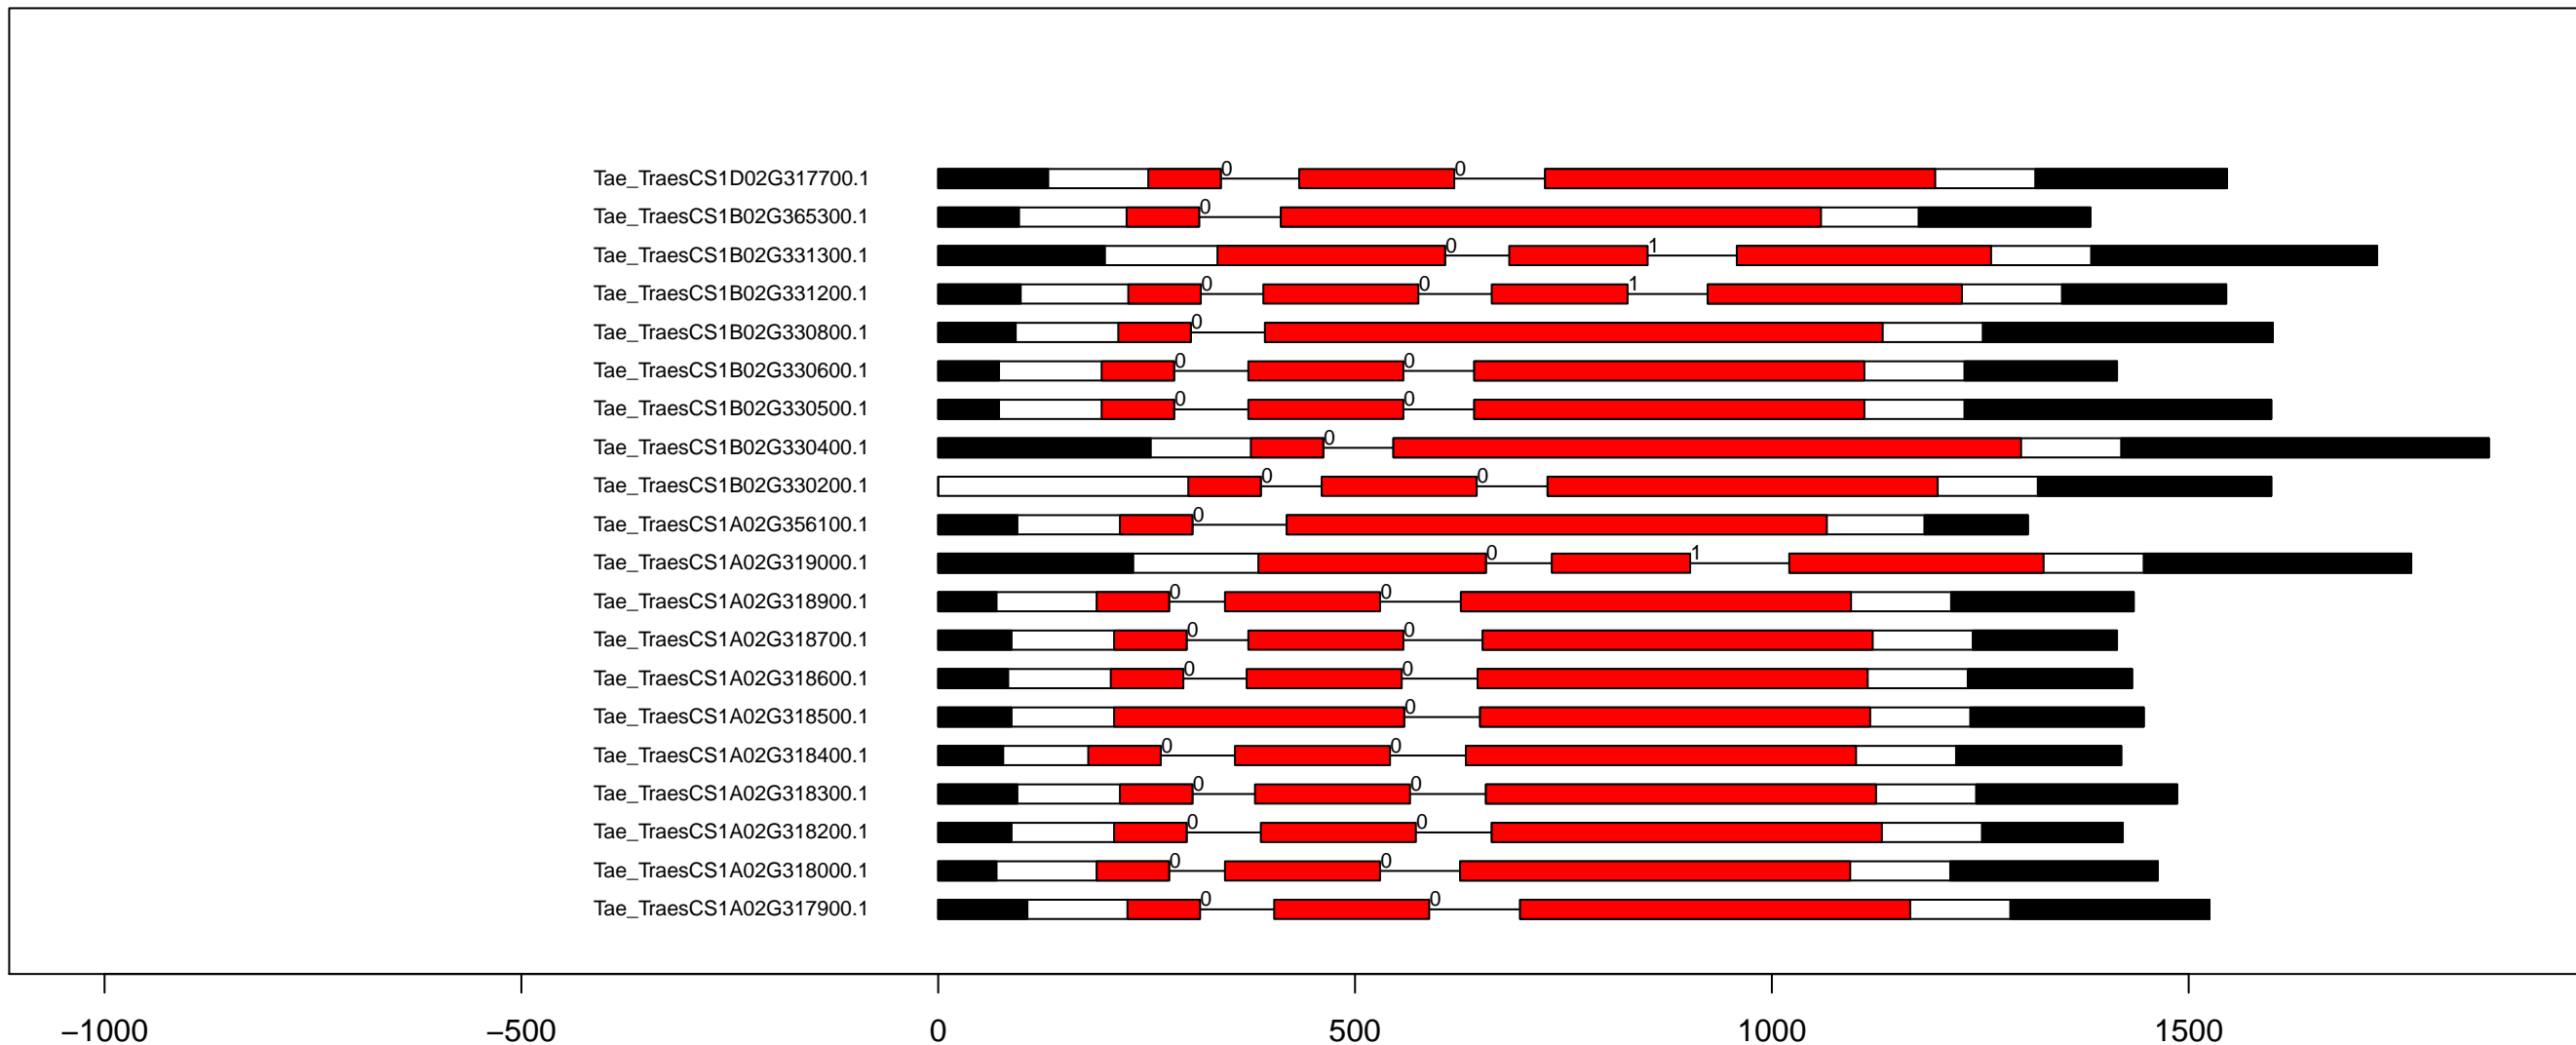

## T.ae class III peroxidase V subfamily exon-intron and prx domain diagram (part 2)

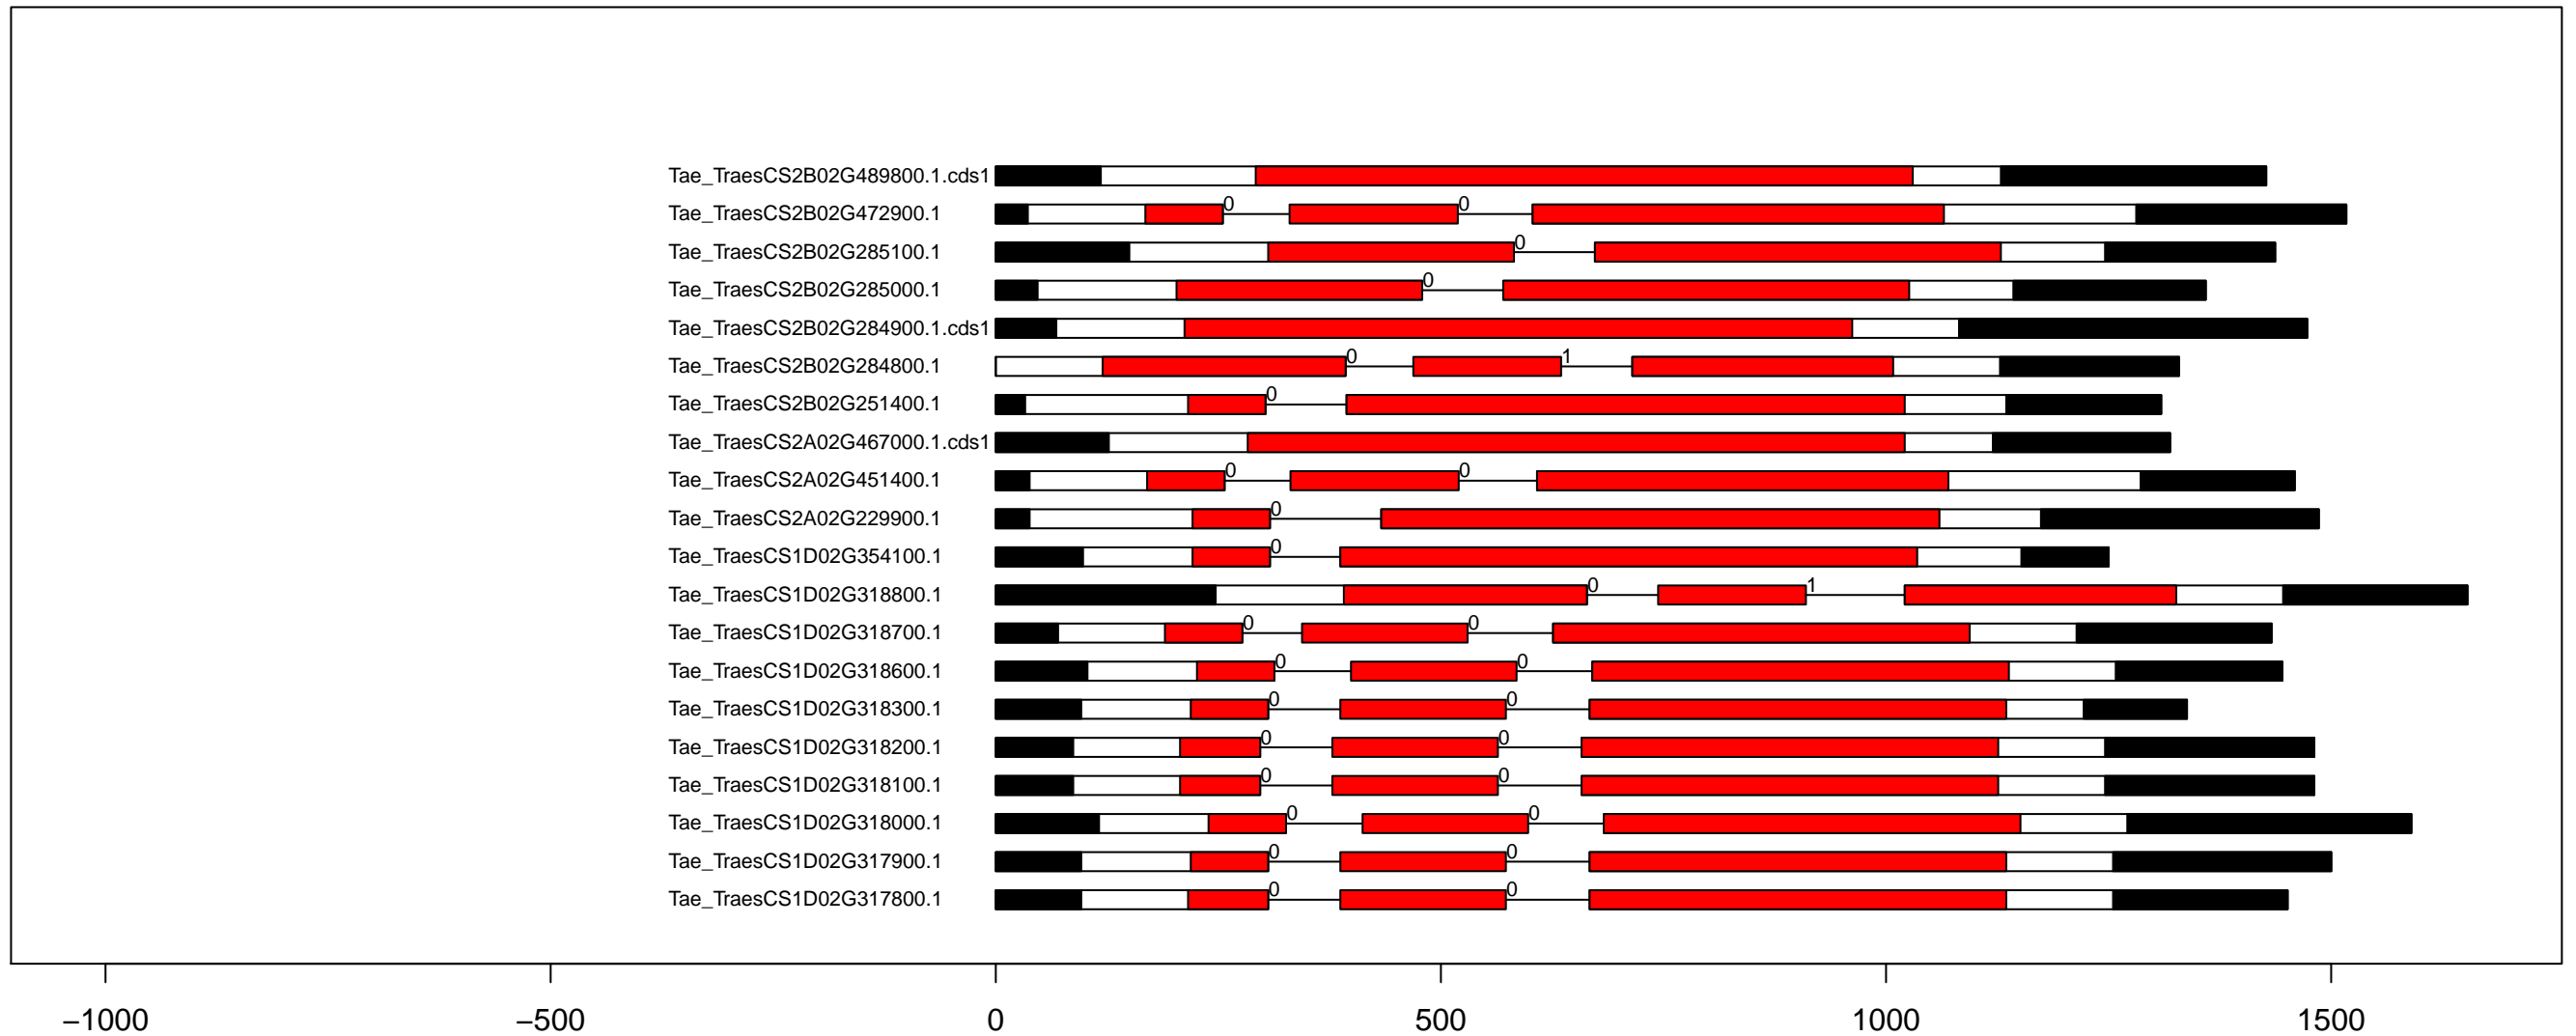



### T.ae class III peroxidase V subfamily exon-intron and prx domain diagram (part 4)

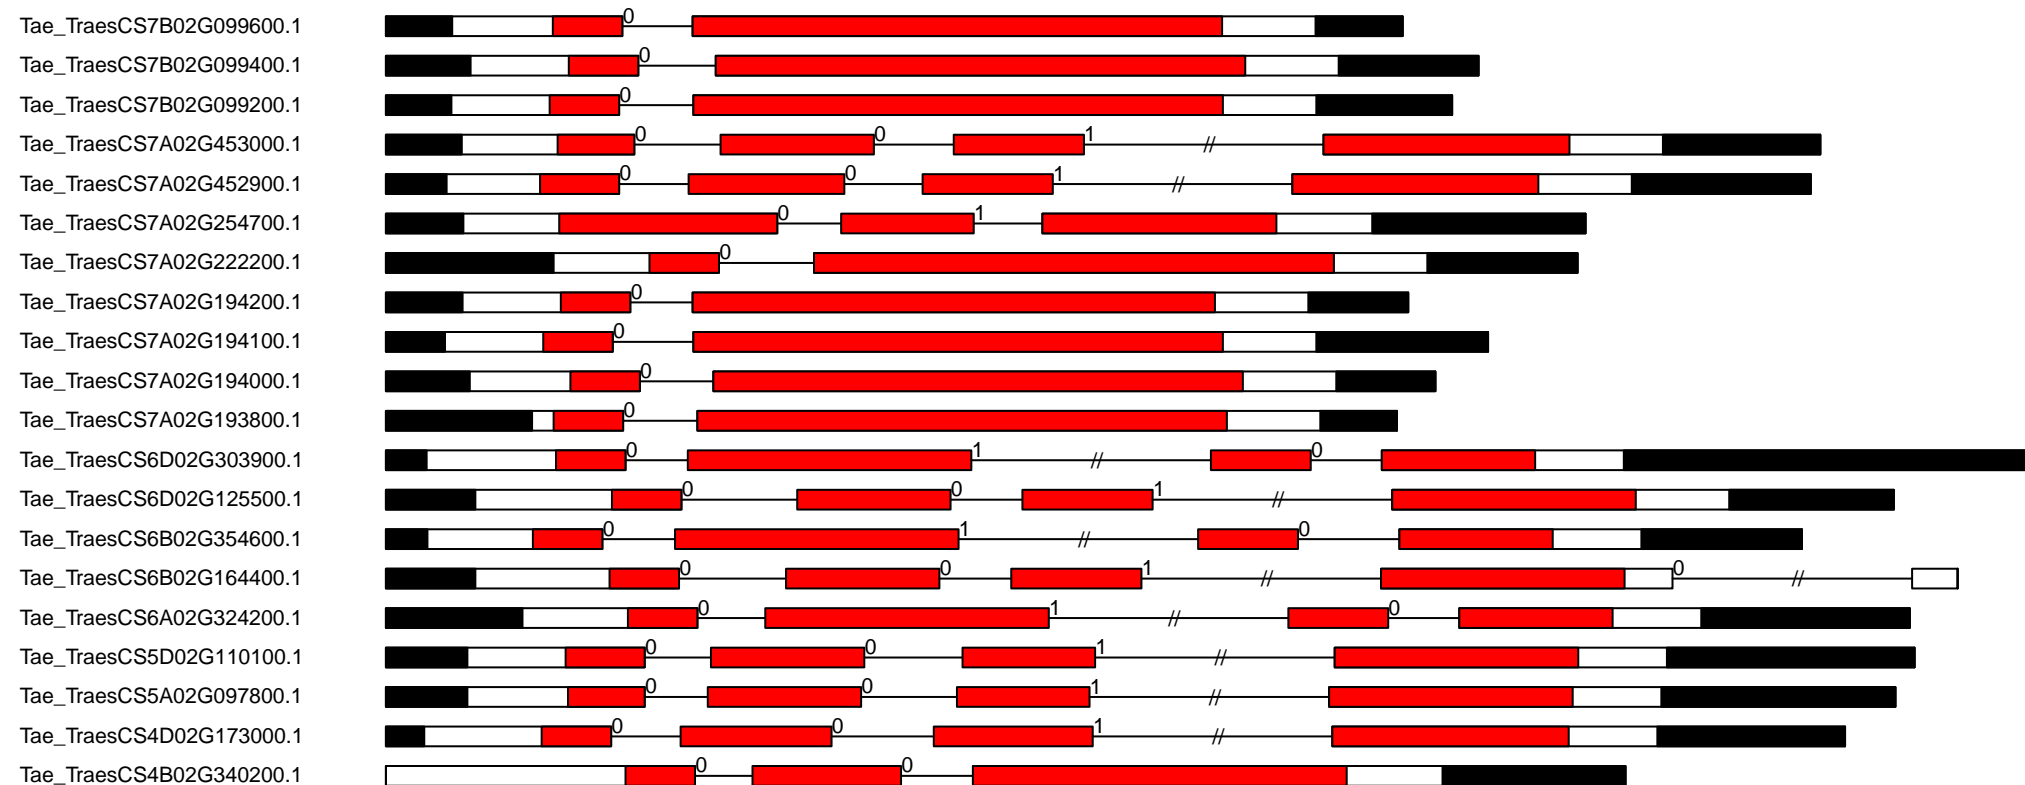

### T.ae class III peroxidase V subfamily exon-intron and prx domain diagram (part 5)

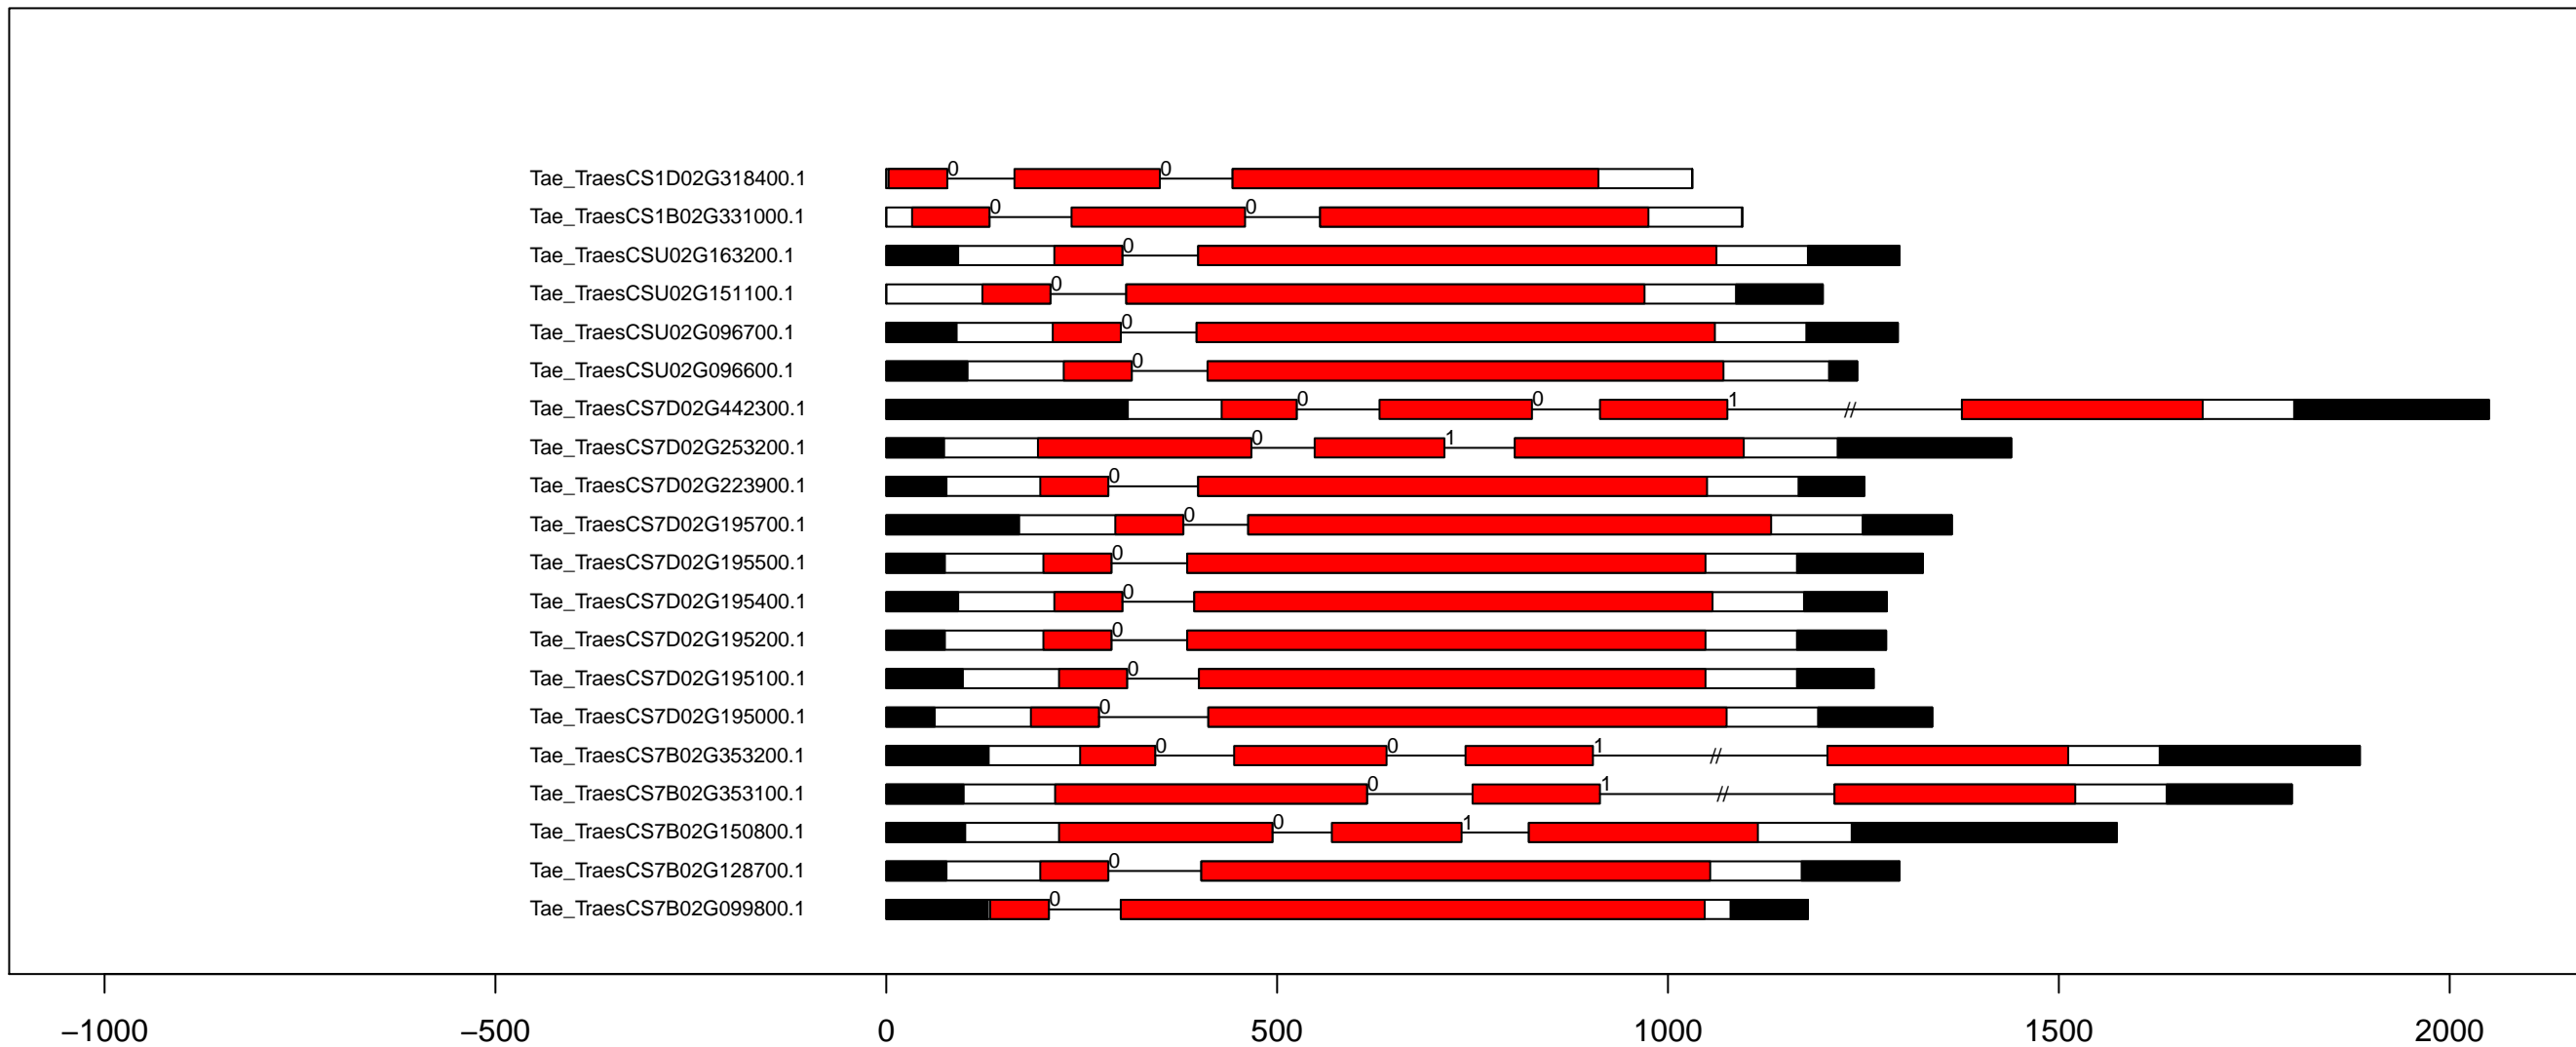



### T.ae class III peroxidase V subfamily exon-intron and prx domain diagram (part 6)

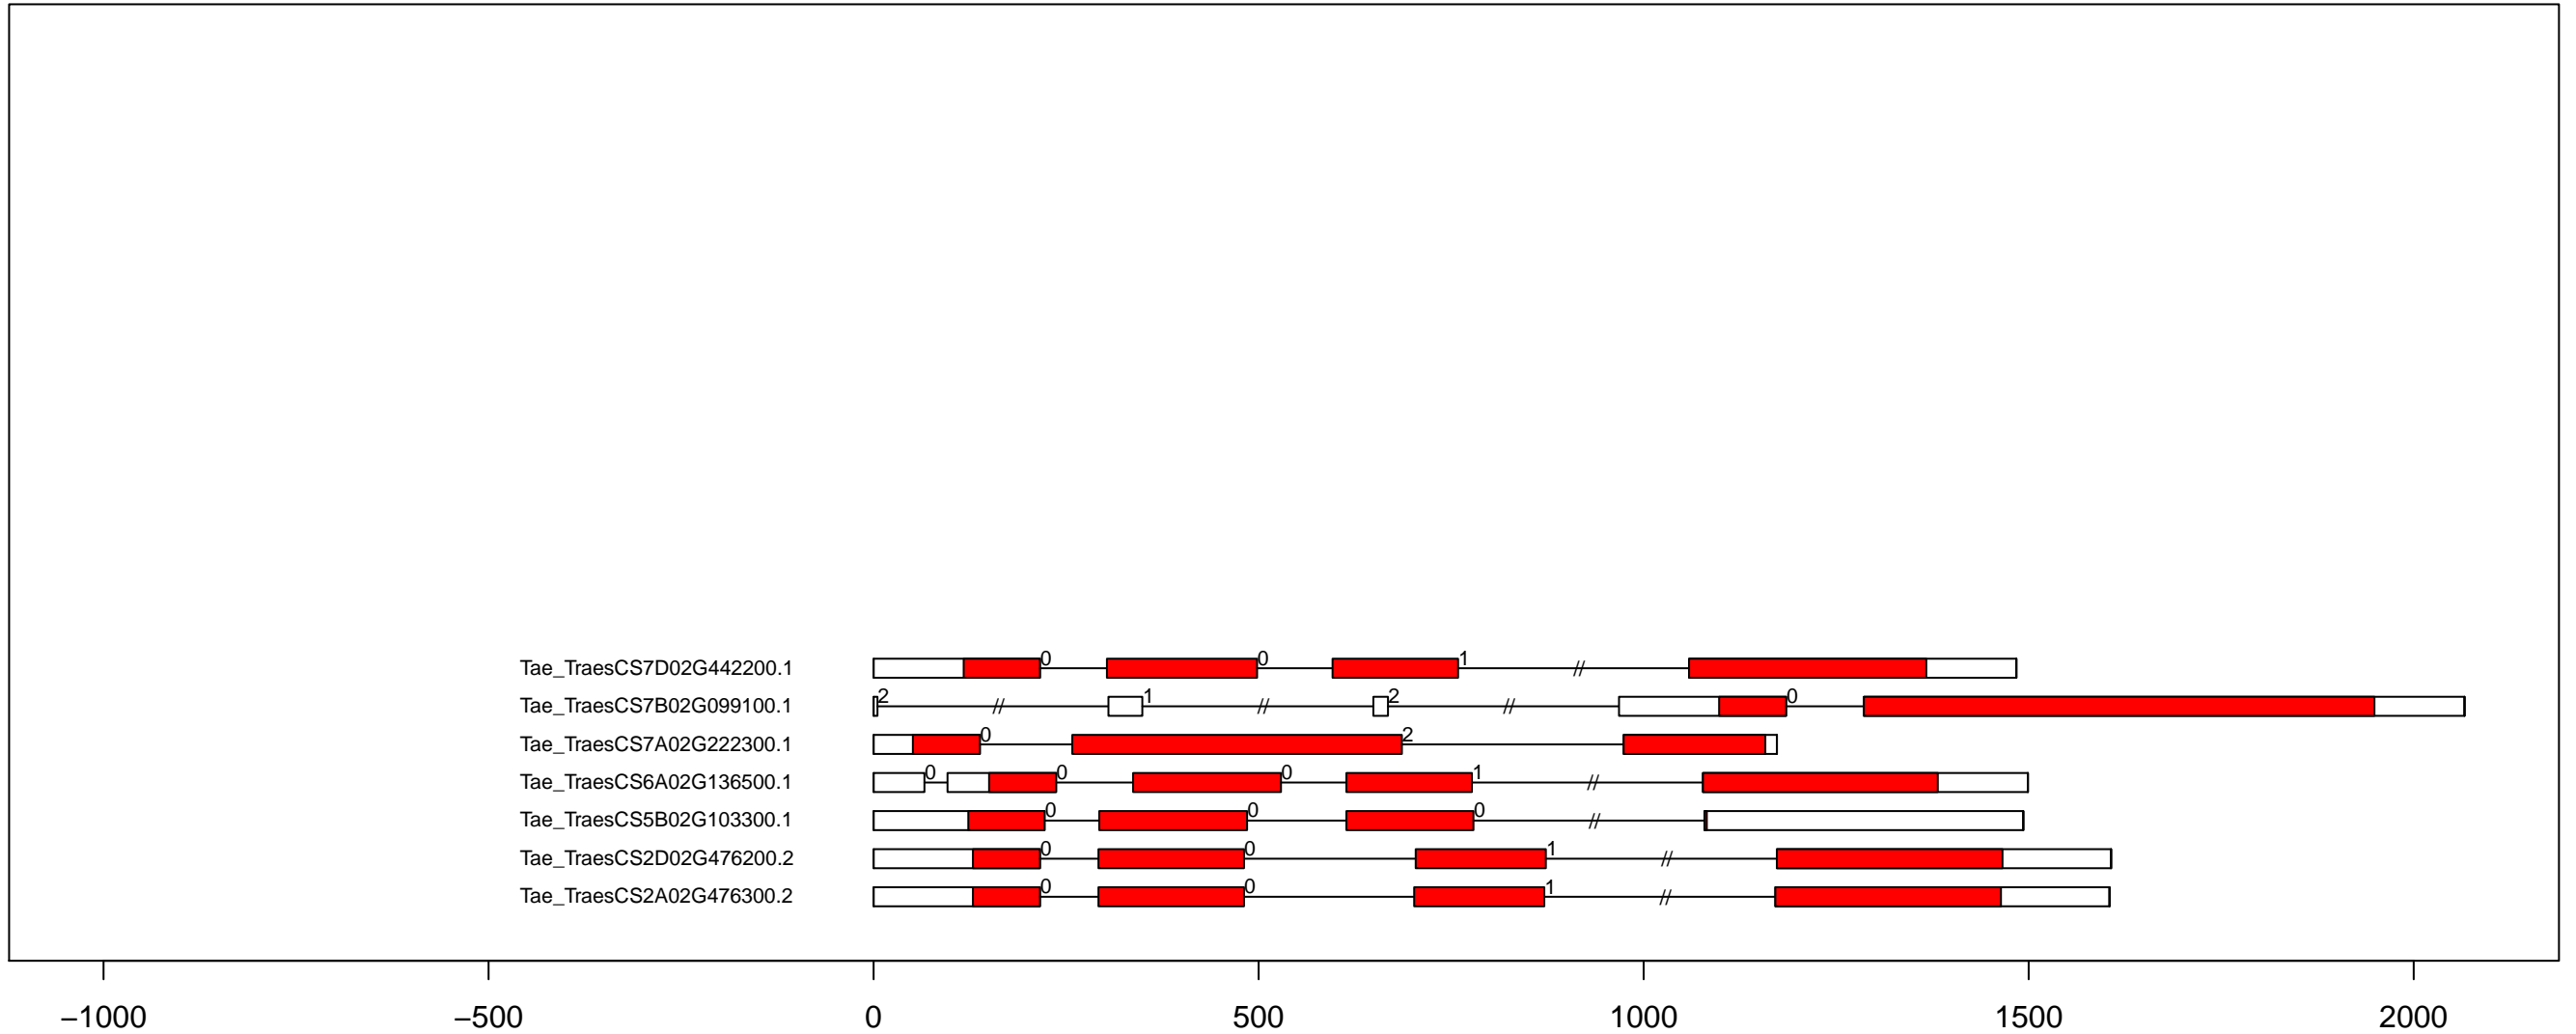

### T.ae class III peroxidase VI subfamily exon-intron and prx domain diagram (part 1)

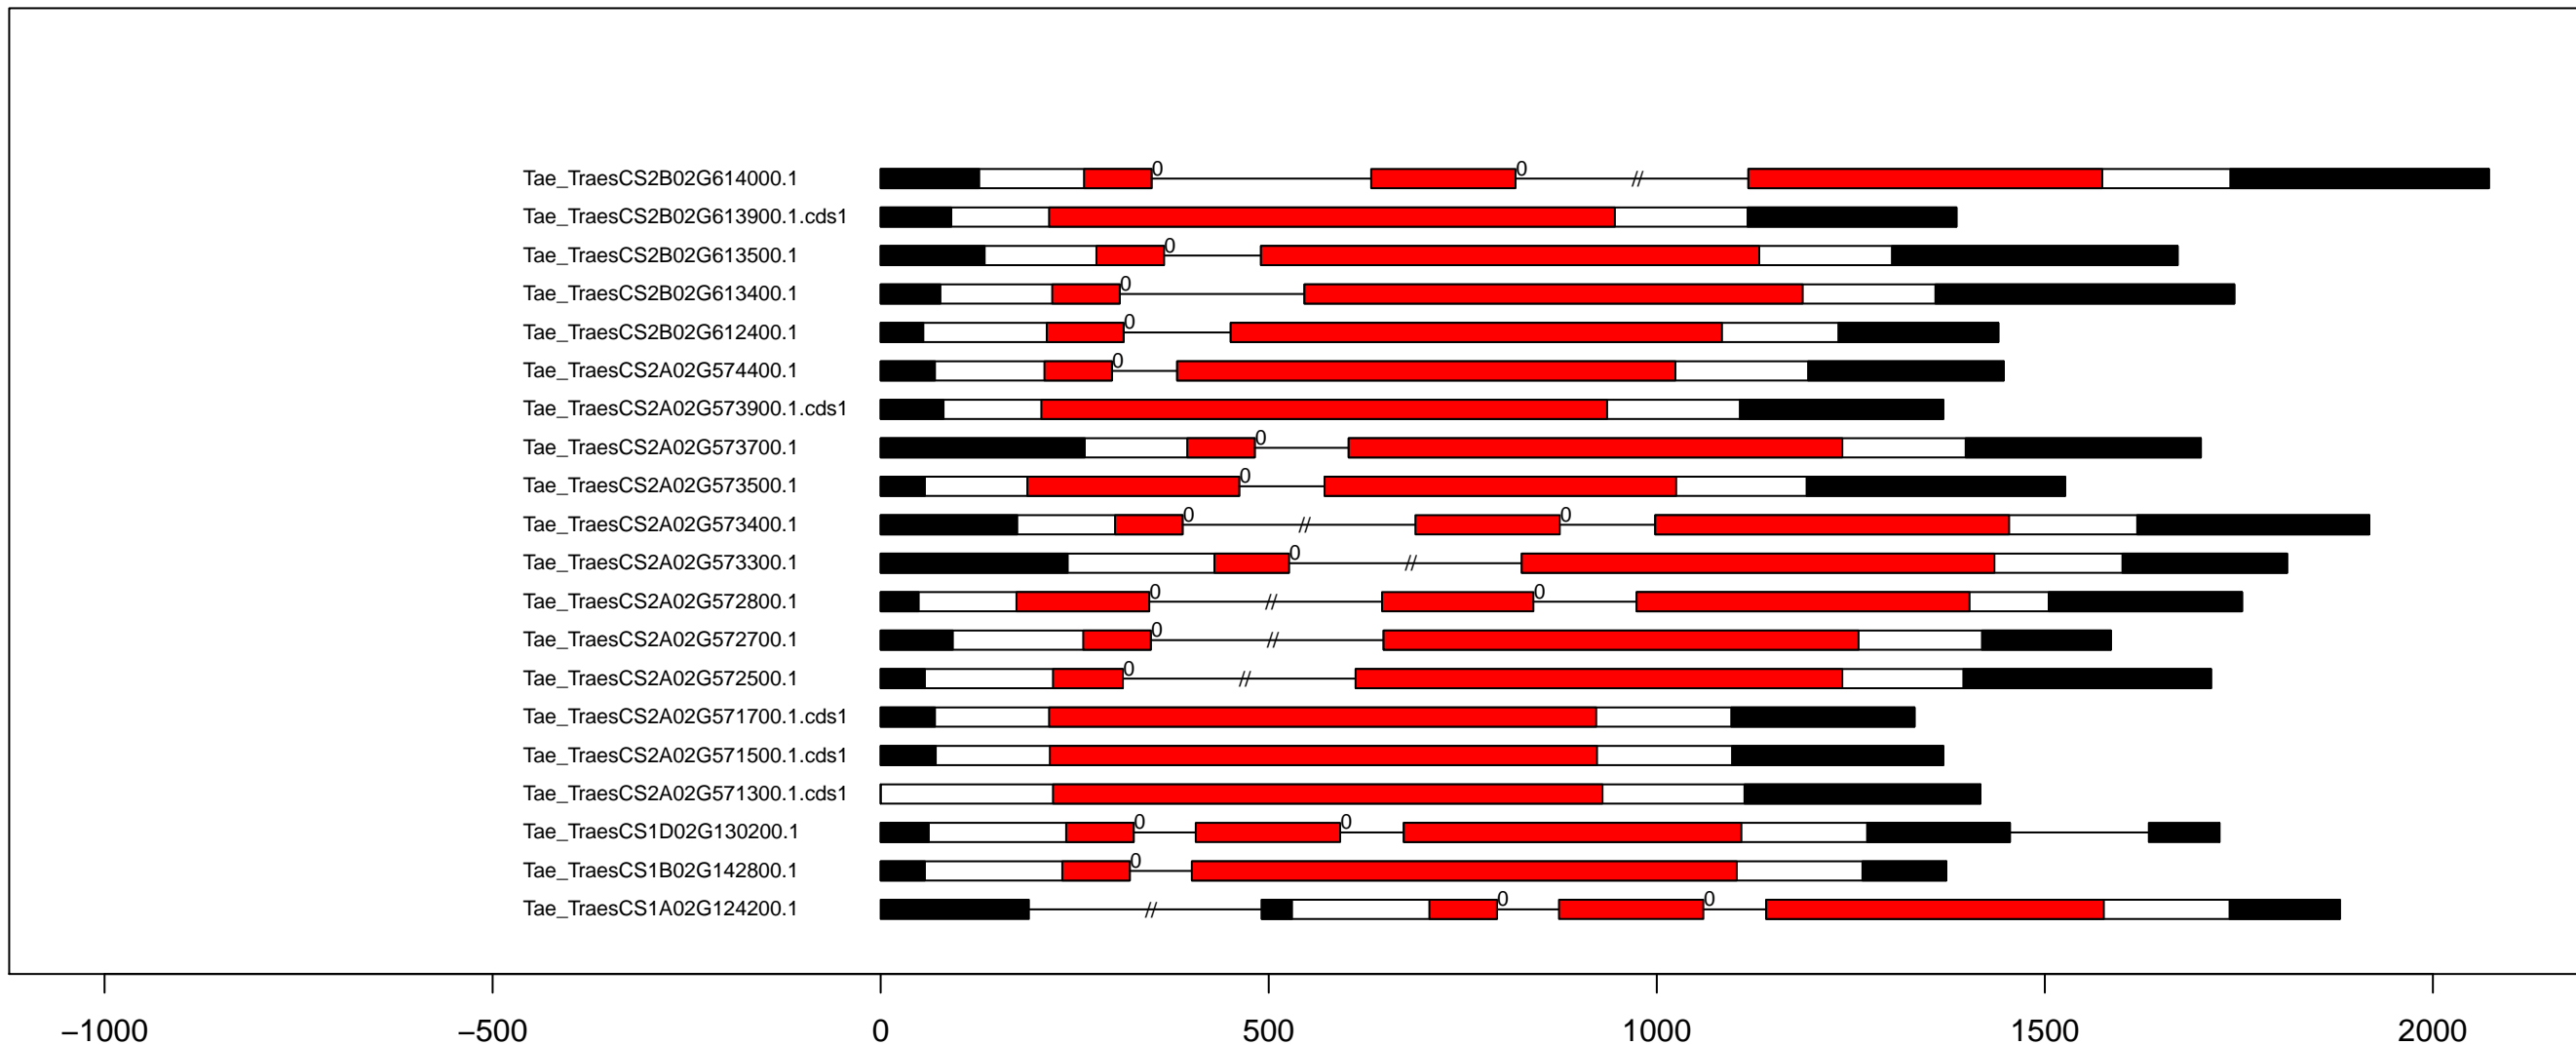

### T.ae class III peroxidase VI subfamily exon-intron and prx domain diagram (part 2)

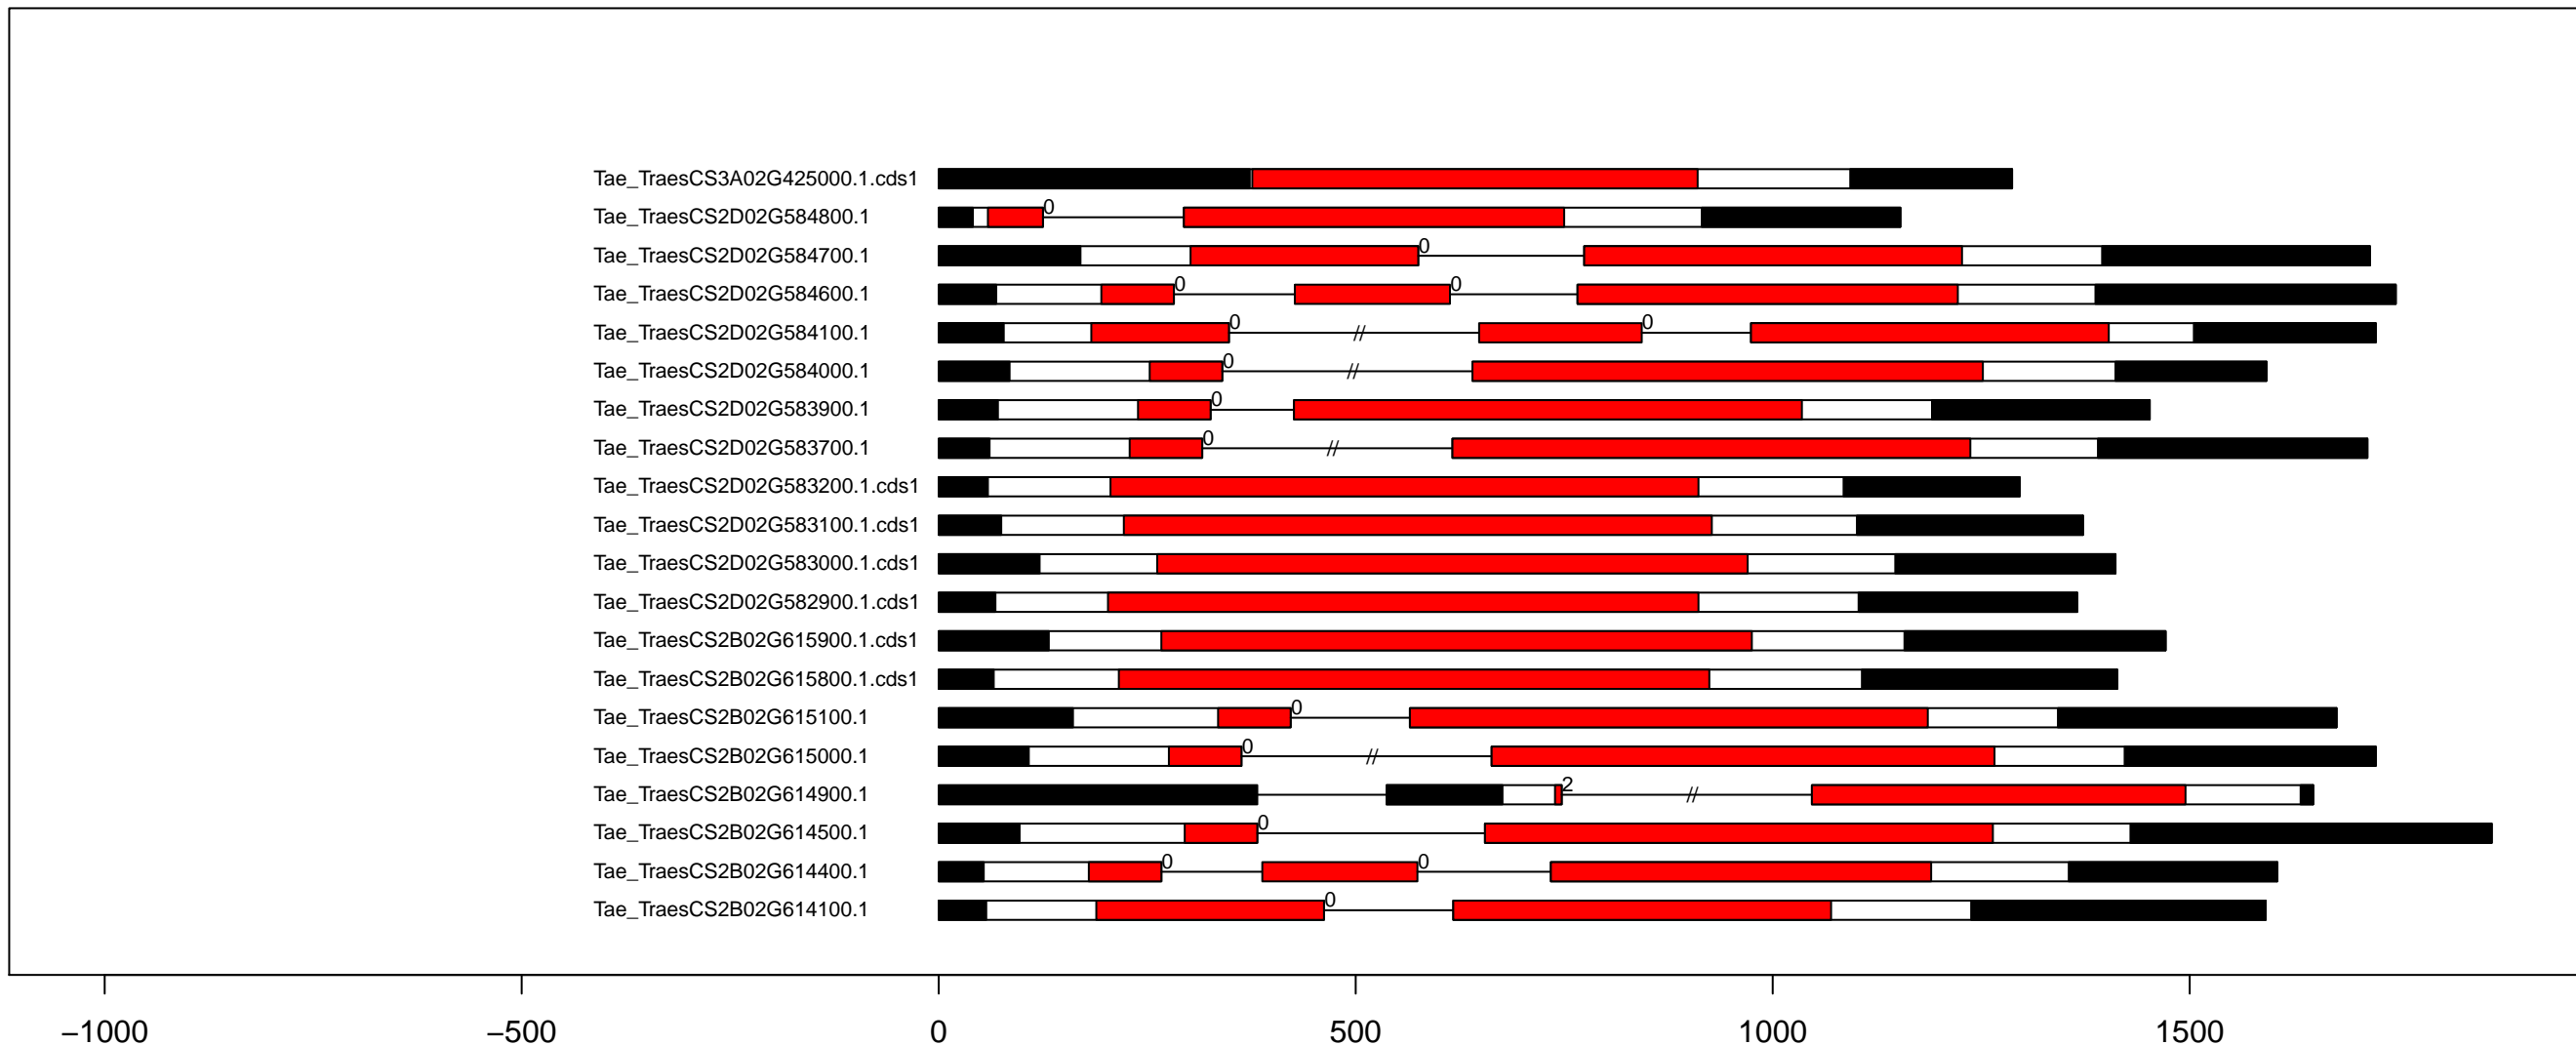

### T.ae class III peroxidase VI subfamily exon-intron and prx domain diagram (part 3)

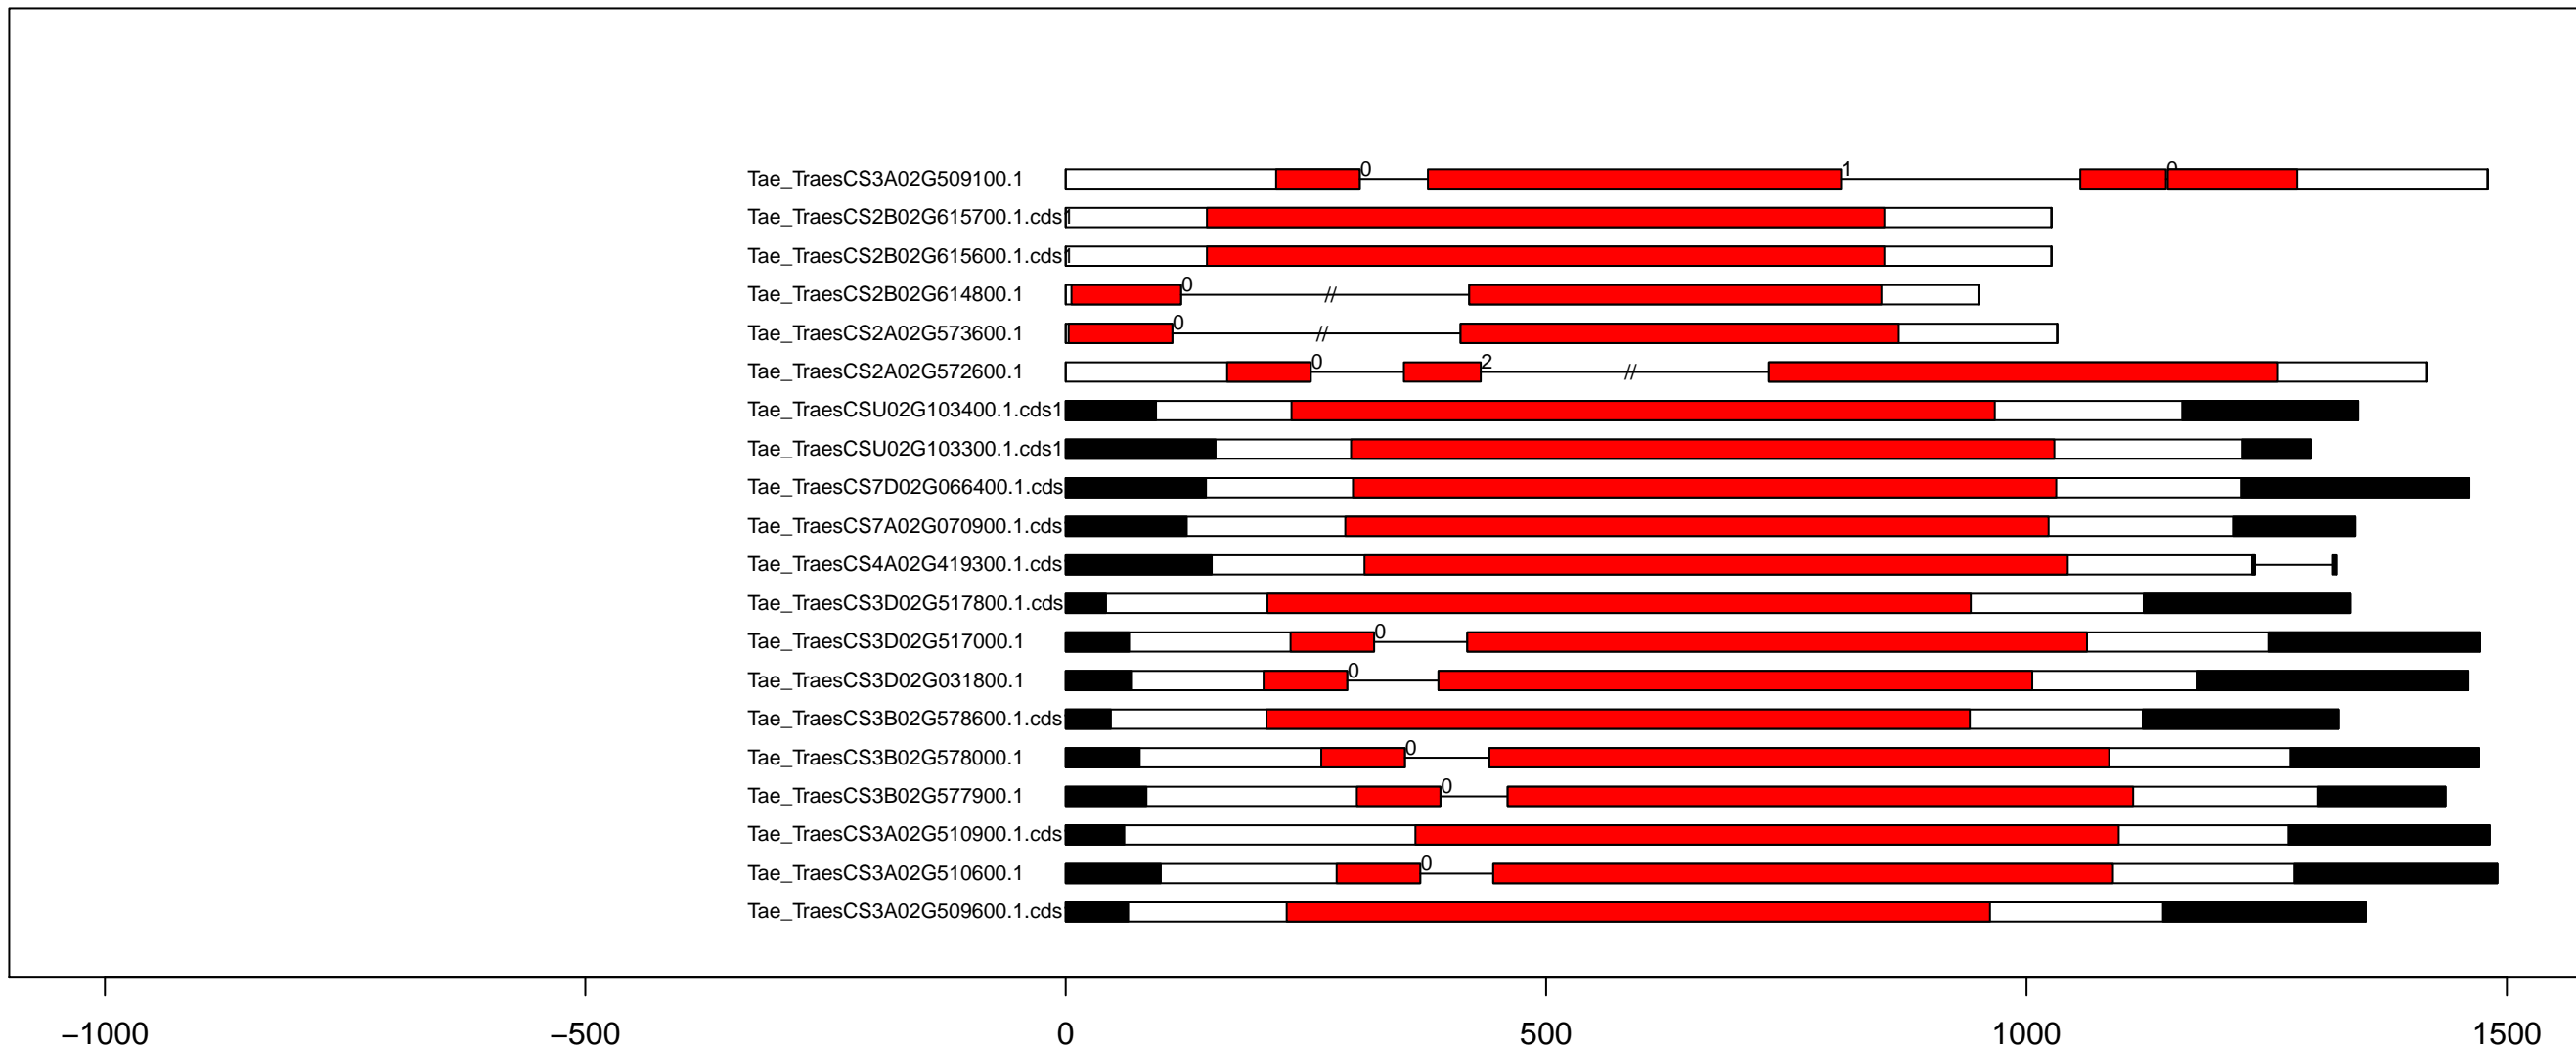

# T.ae class III peroxidase VI subfamily exon-intron and prx domain diagram (part 4)

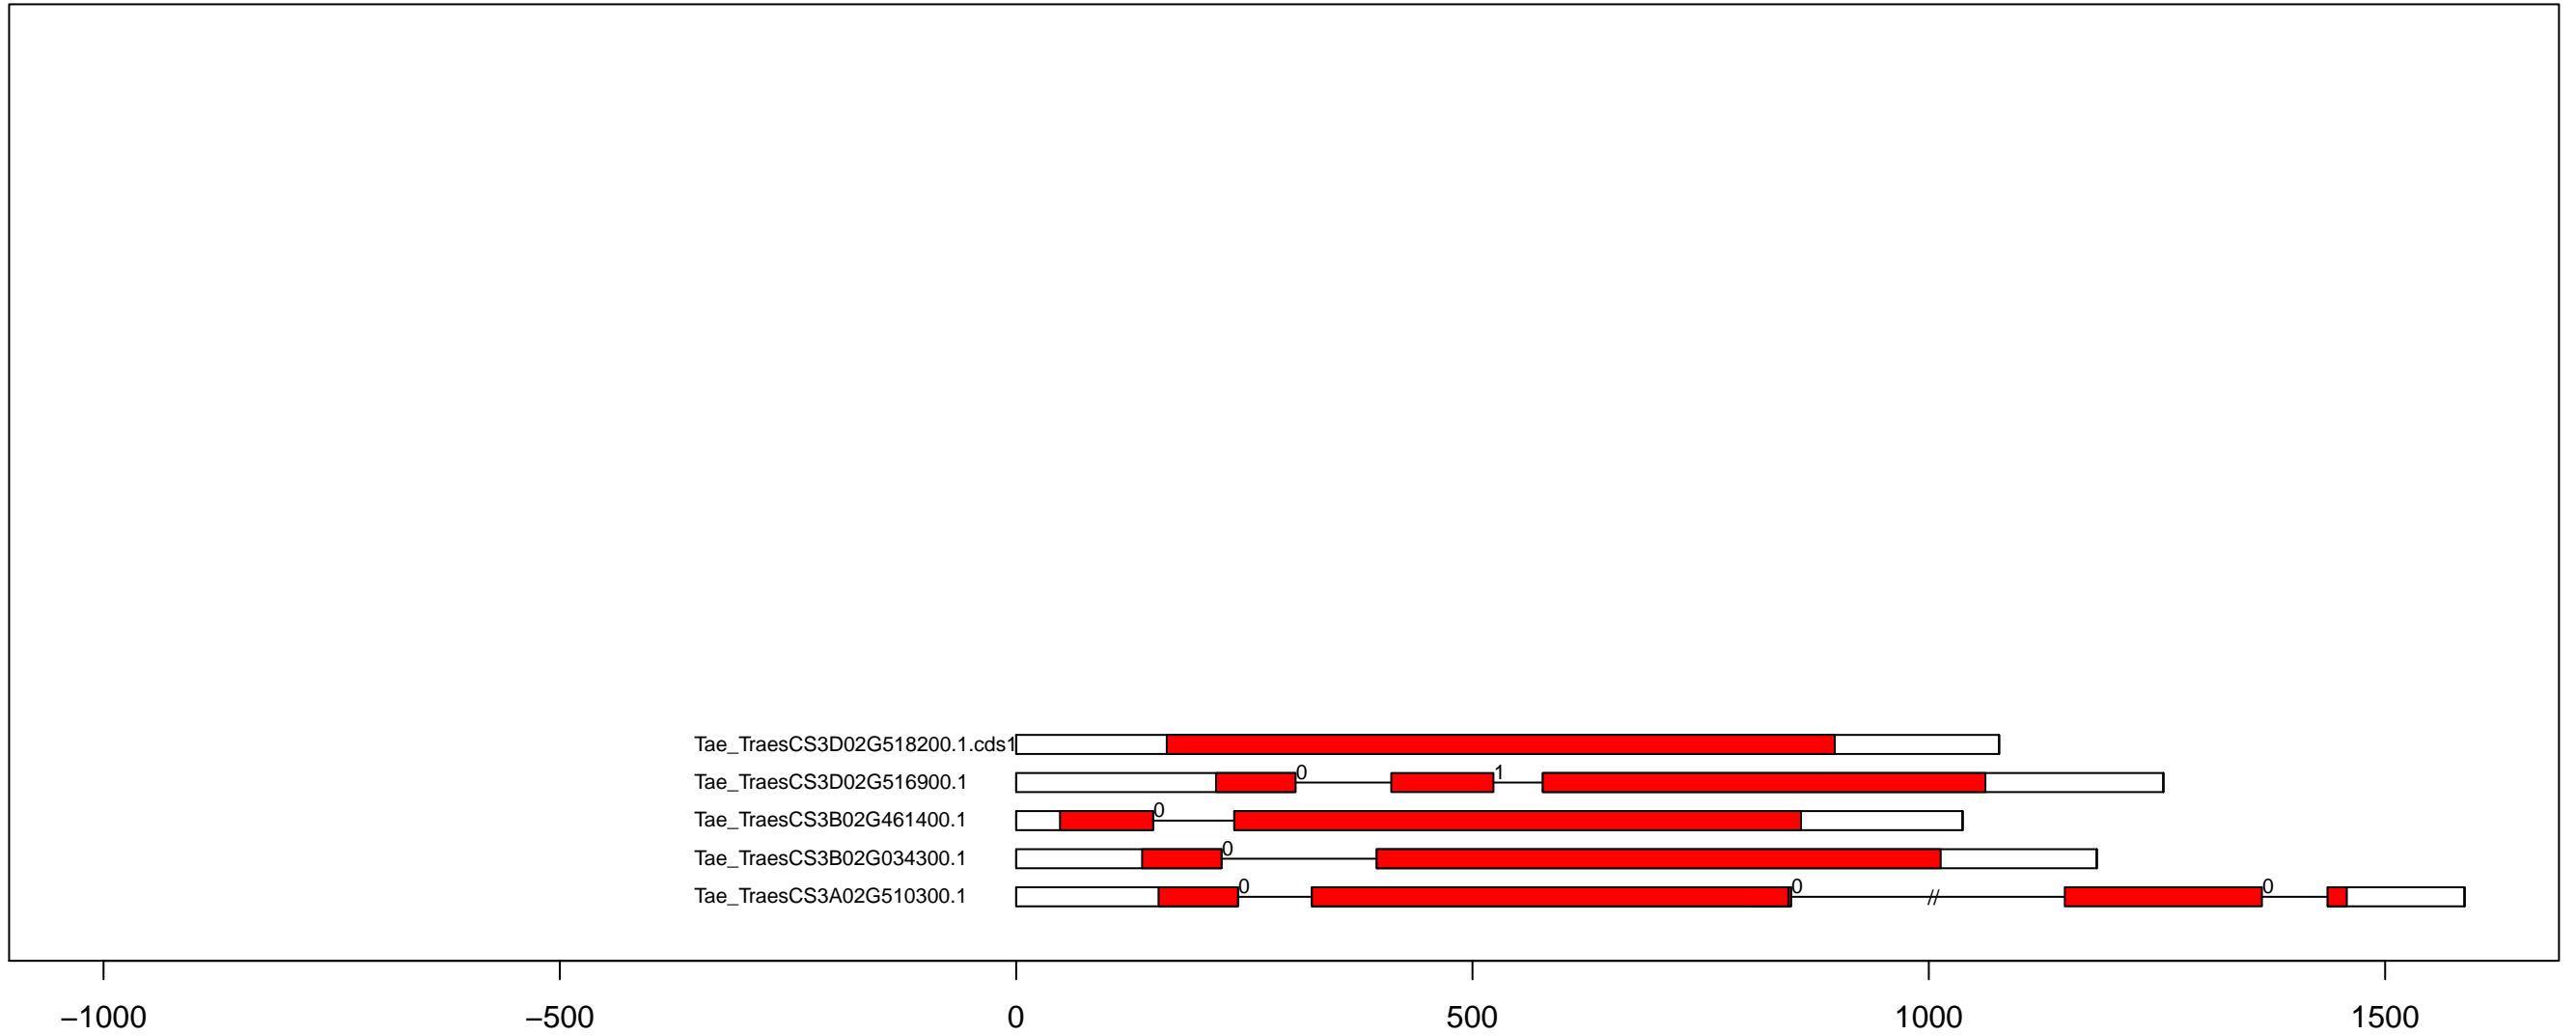



# T.ae class III peroxidase VII subfamily exon-intron and prx domain diagram (part 2)

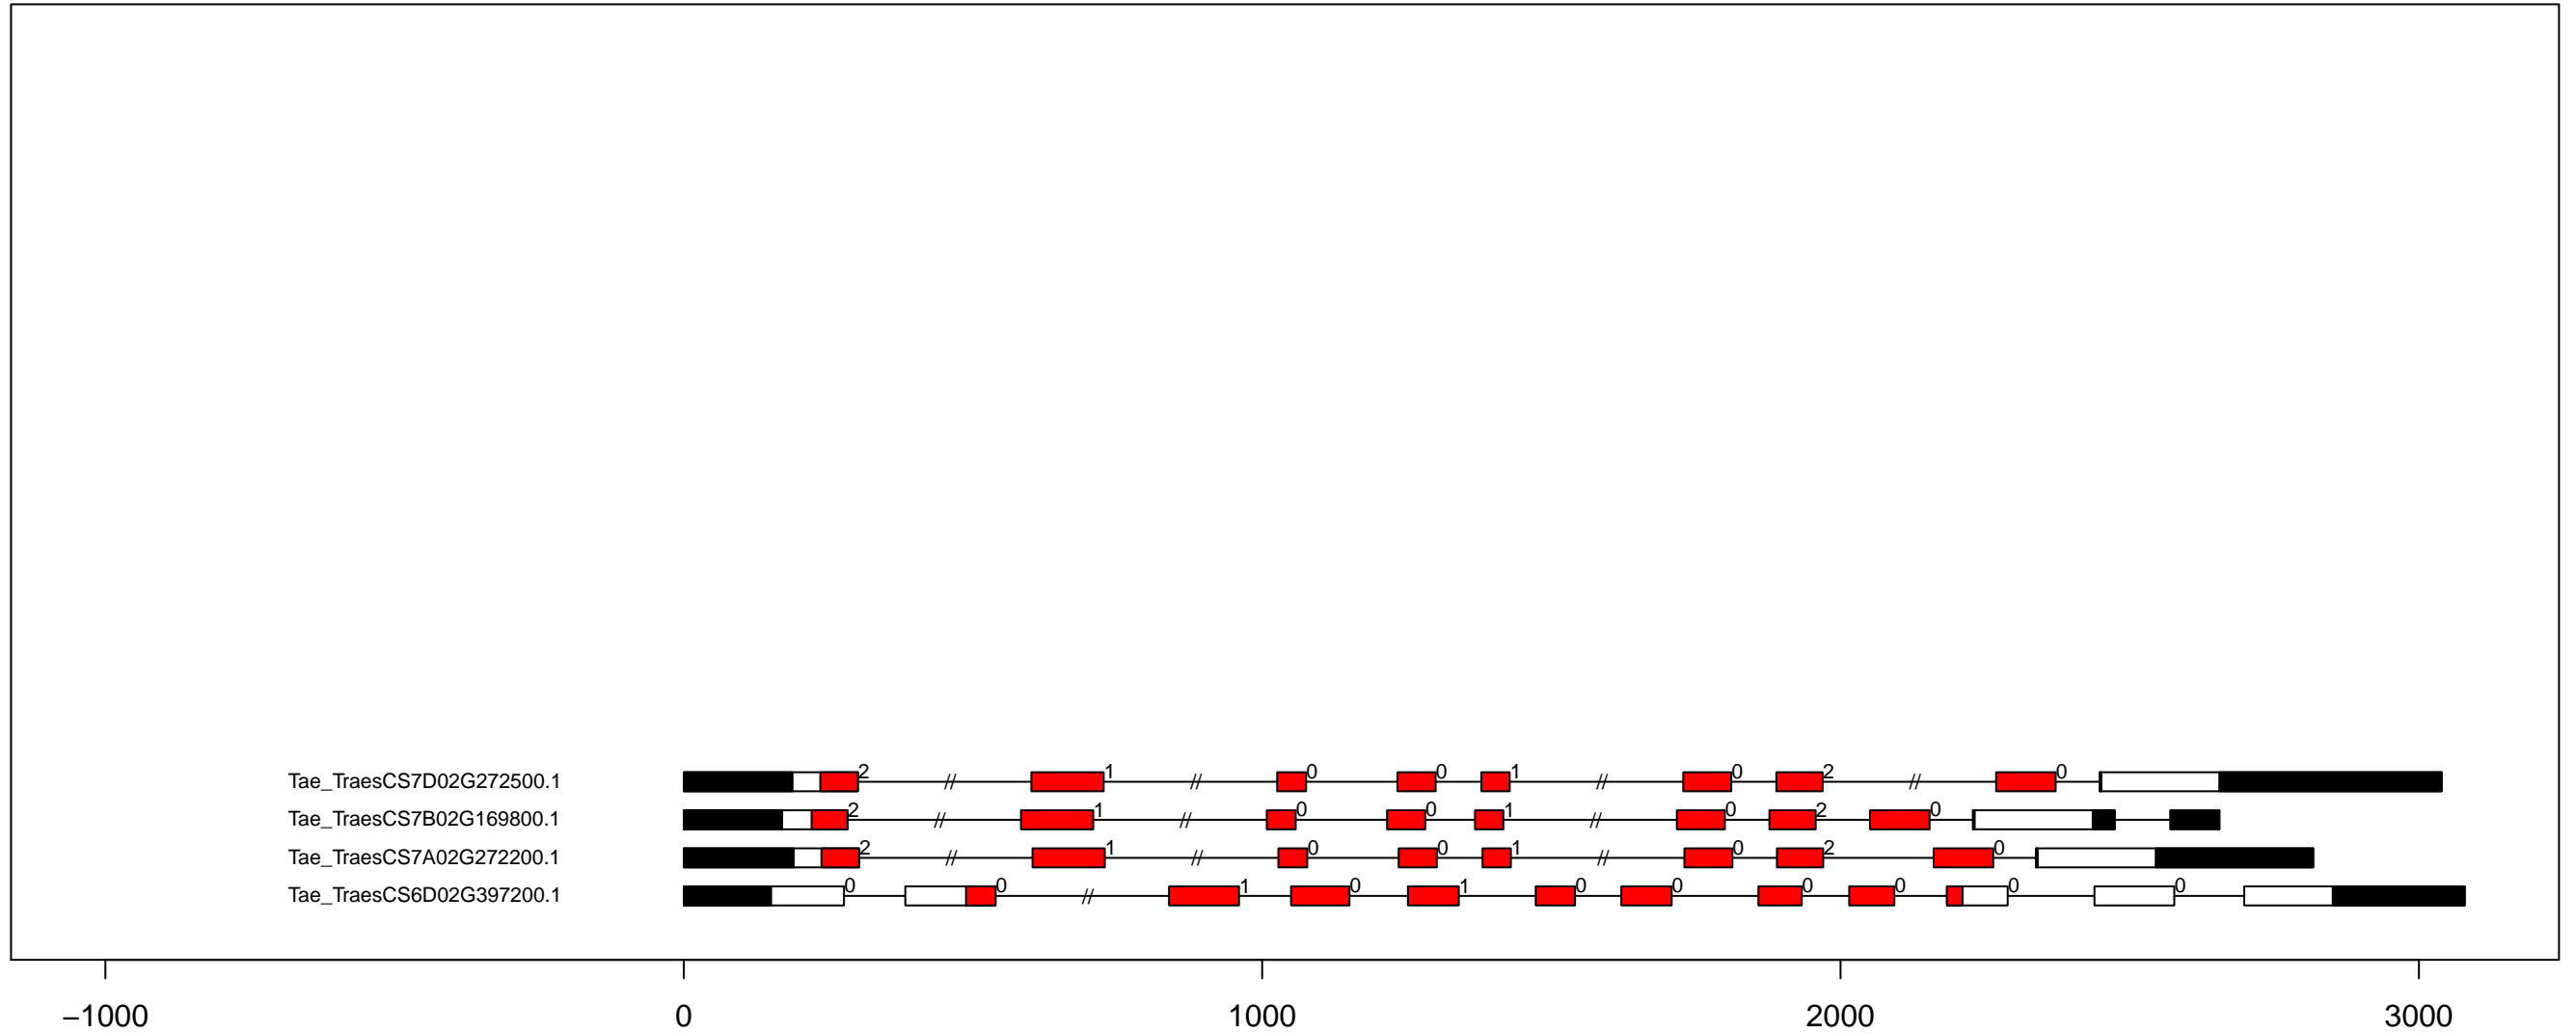

### T.ae class III peroxidase IX subfamily exon-intron and prx domain diagram (part 1)

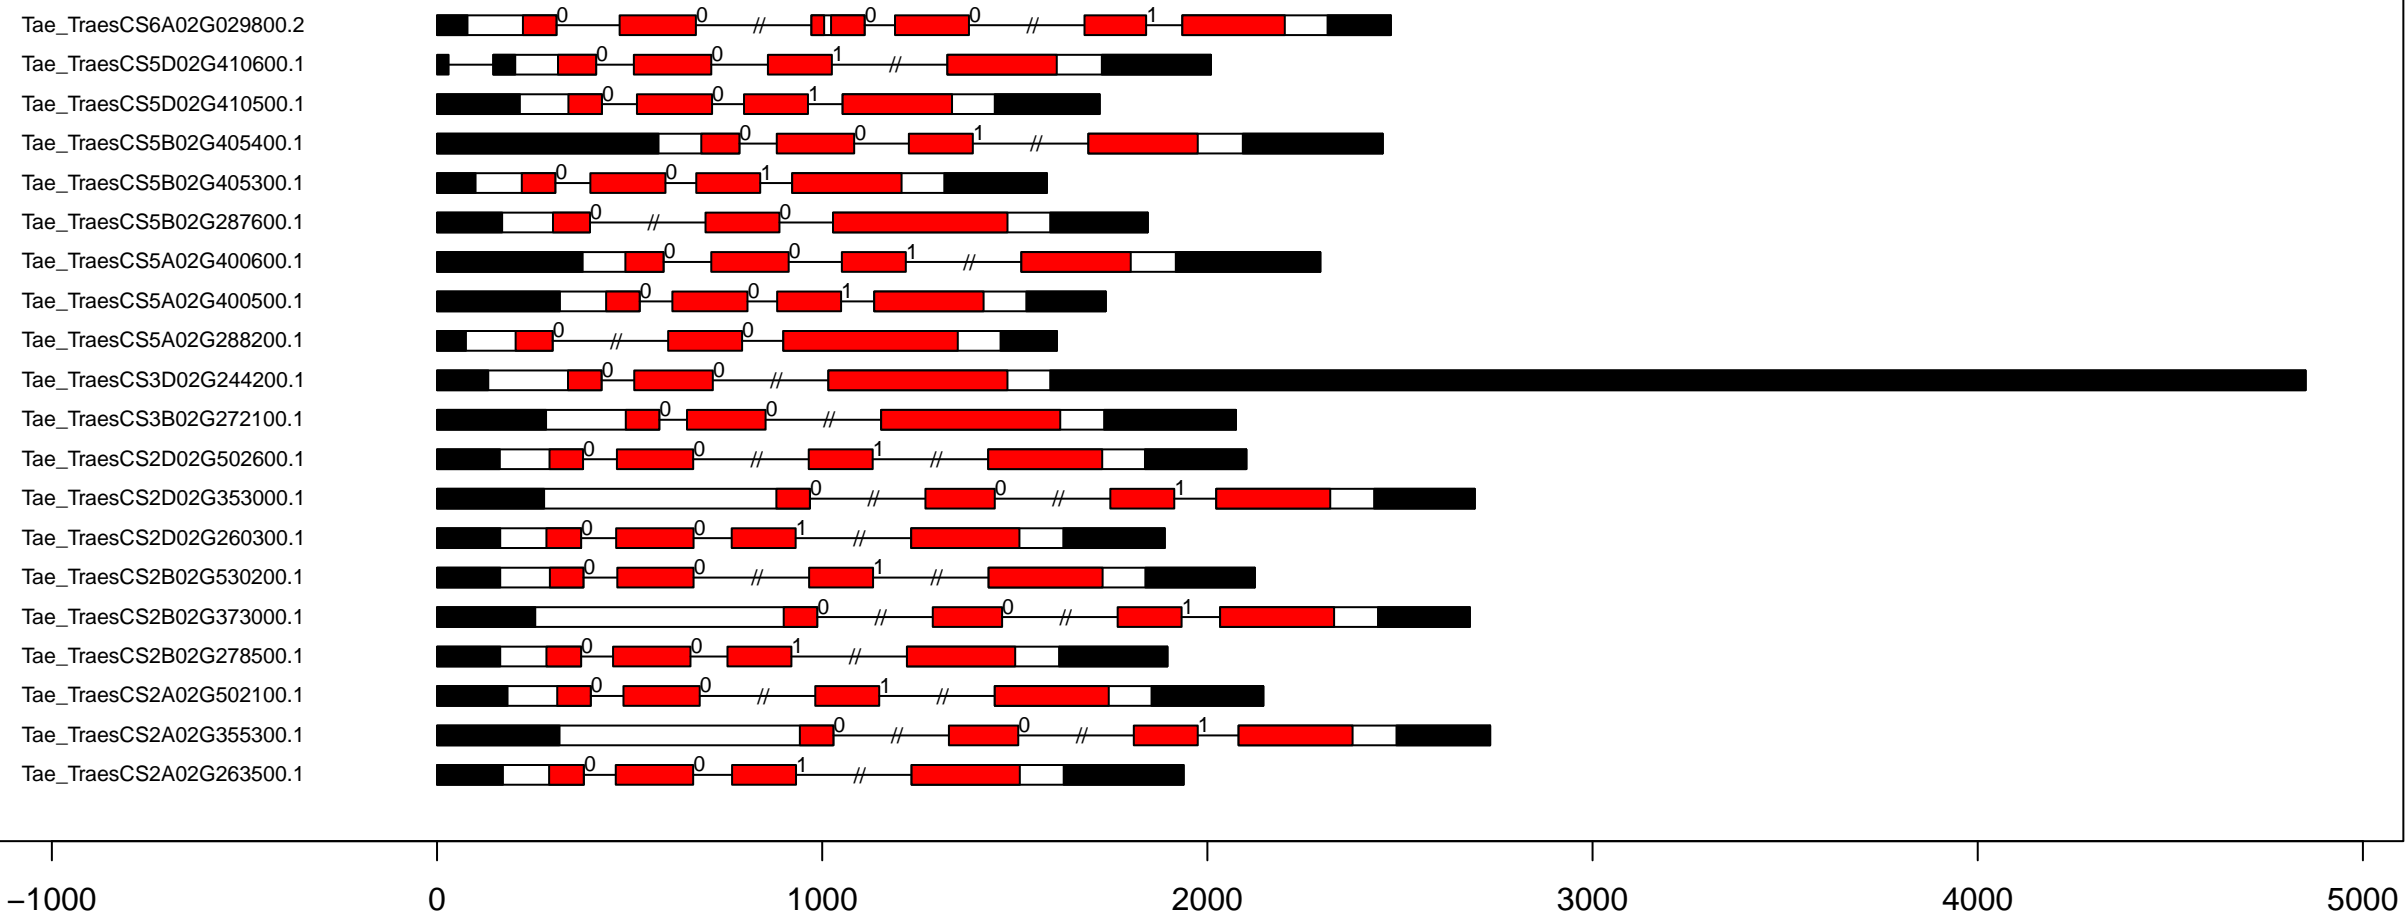



### T.ae class III peroxidase IX subfamily exon-intron and prx domain diagram (part 2)

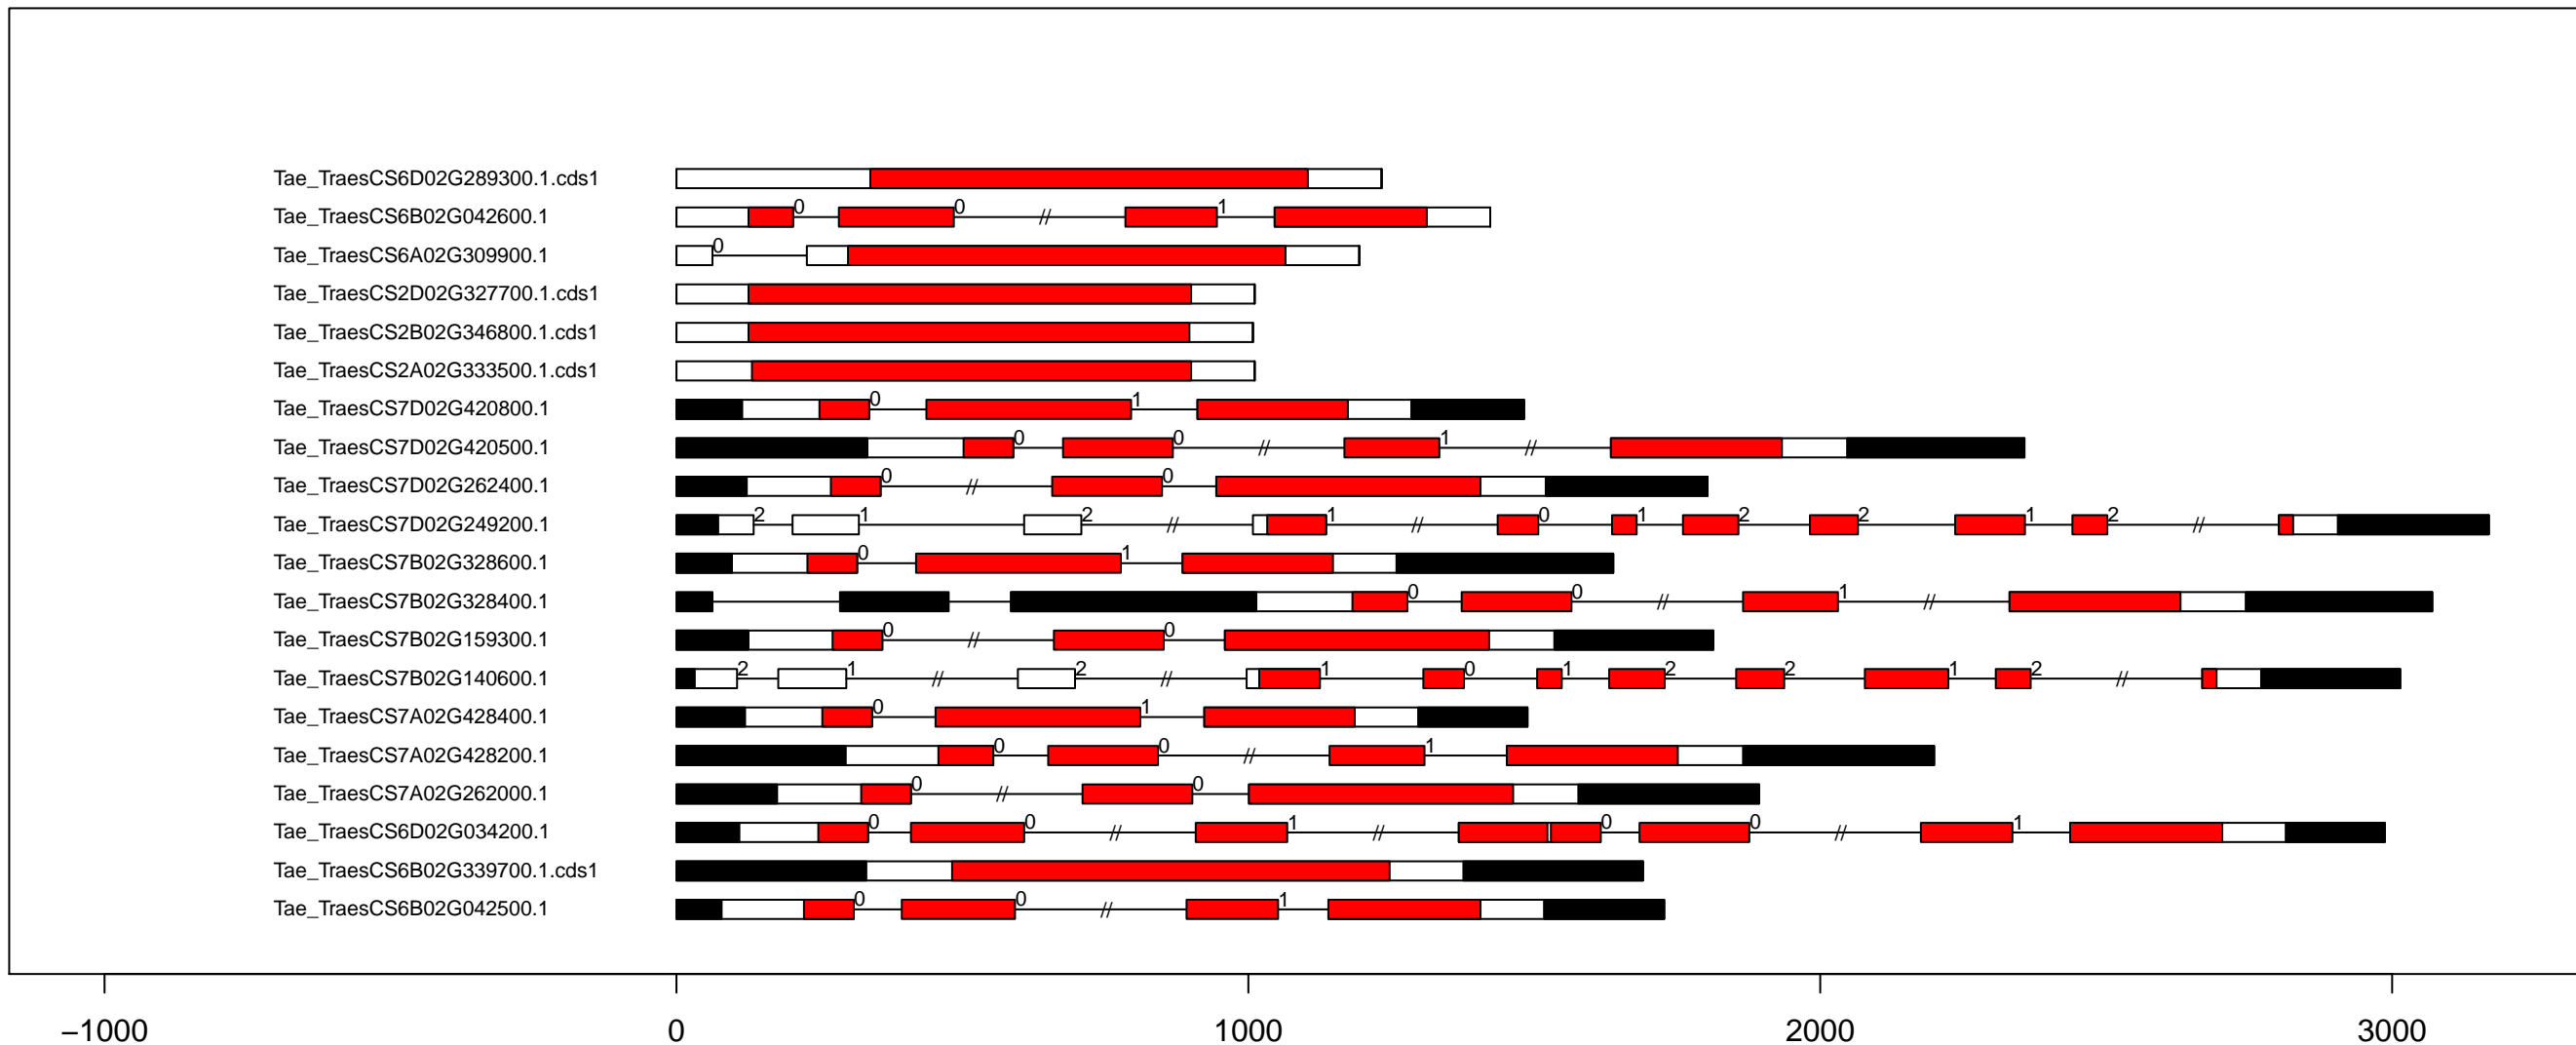

### T.ae class III peroxidase IX subfamily exon-intron and prx domain diagram (part 3)

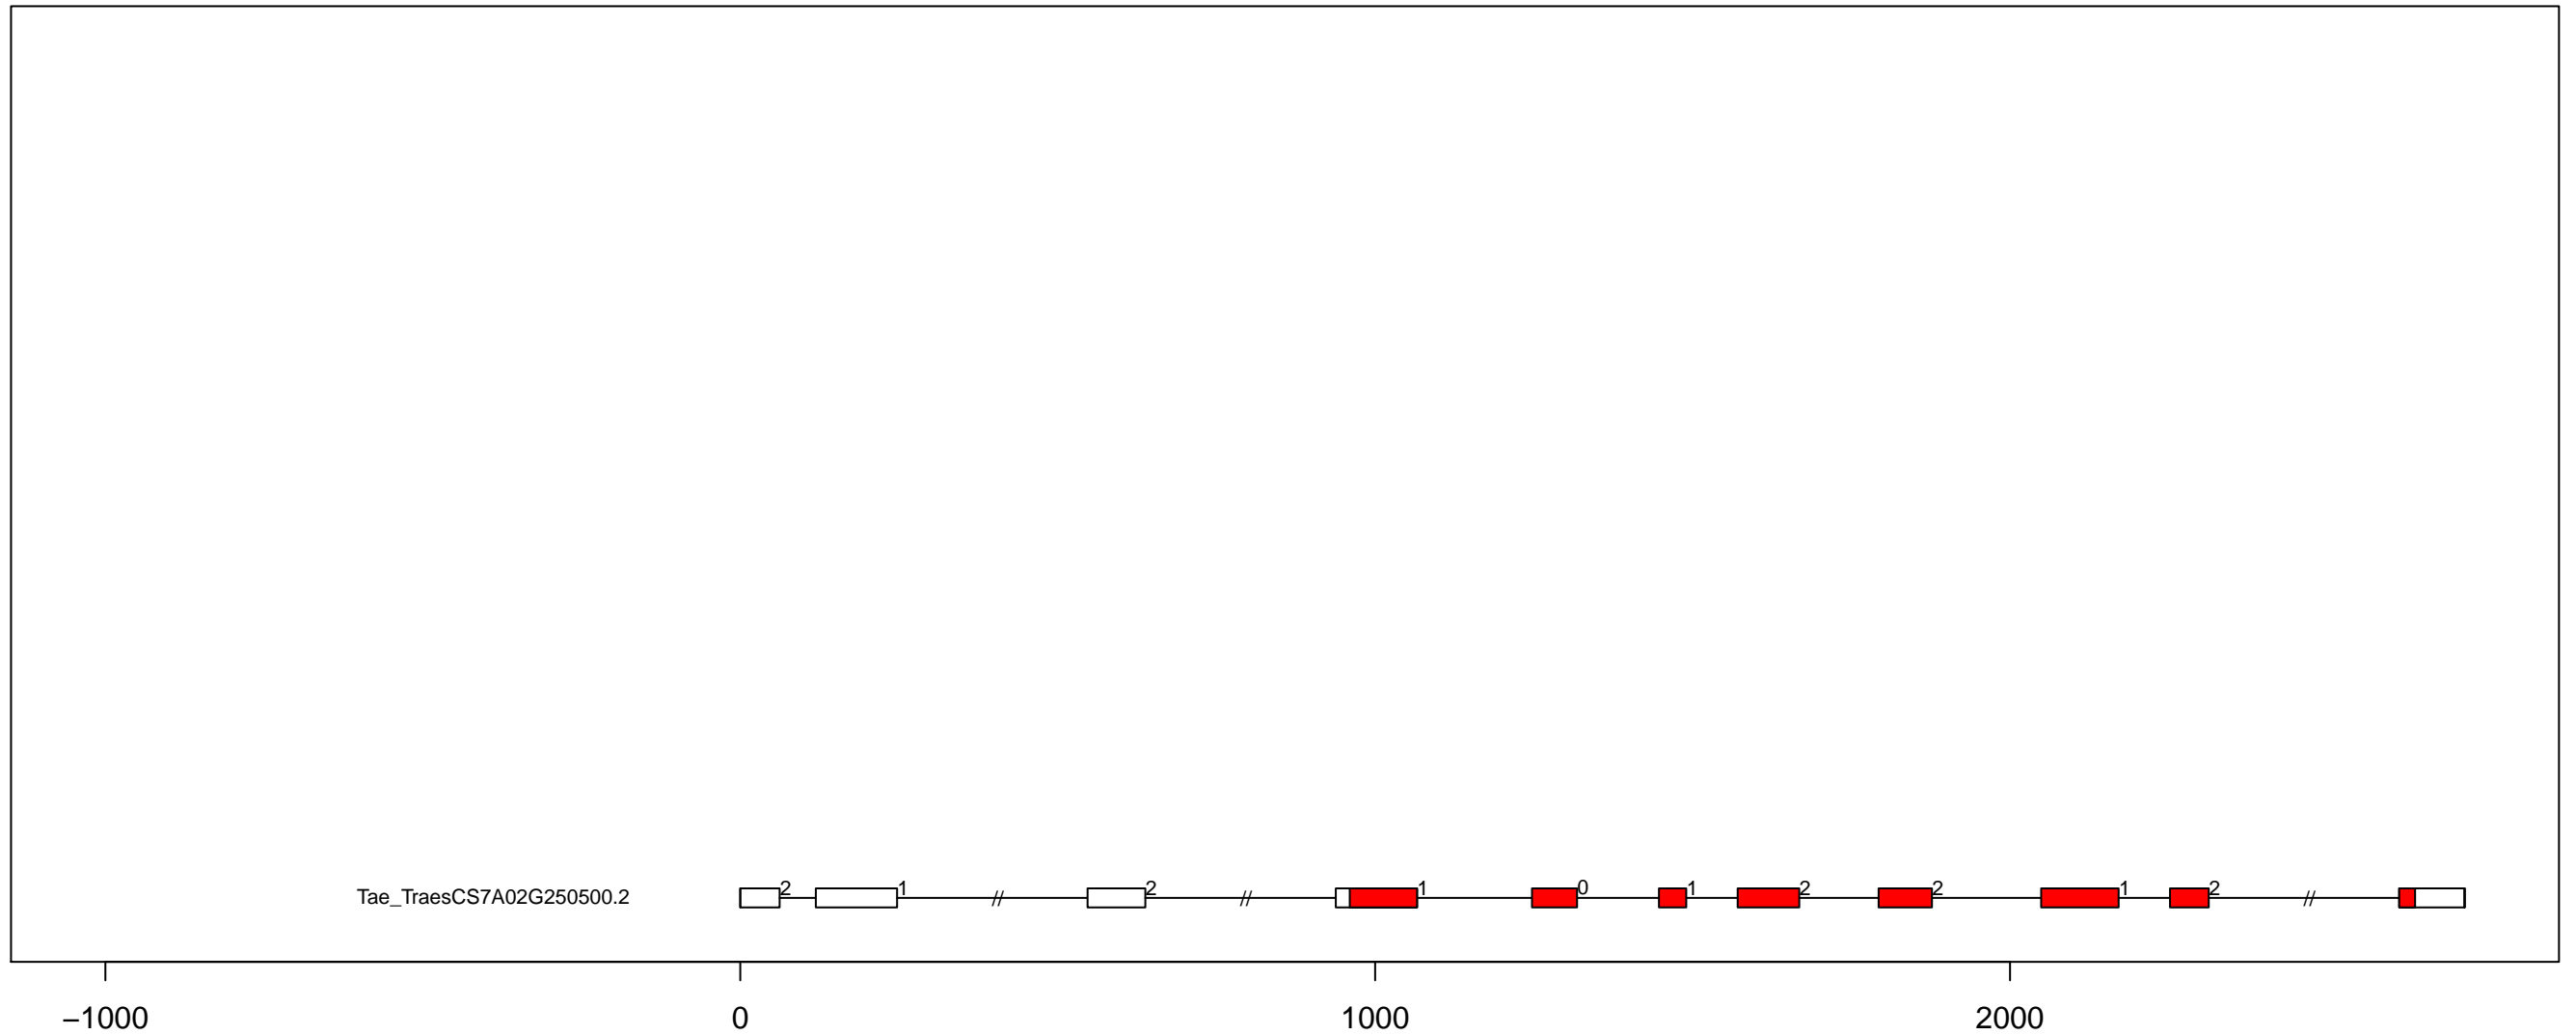

### T.ae class III peroxidase X subfamily exon-intron and prx domain diagram (all)

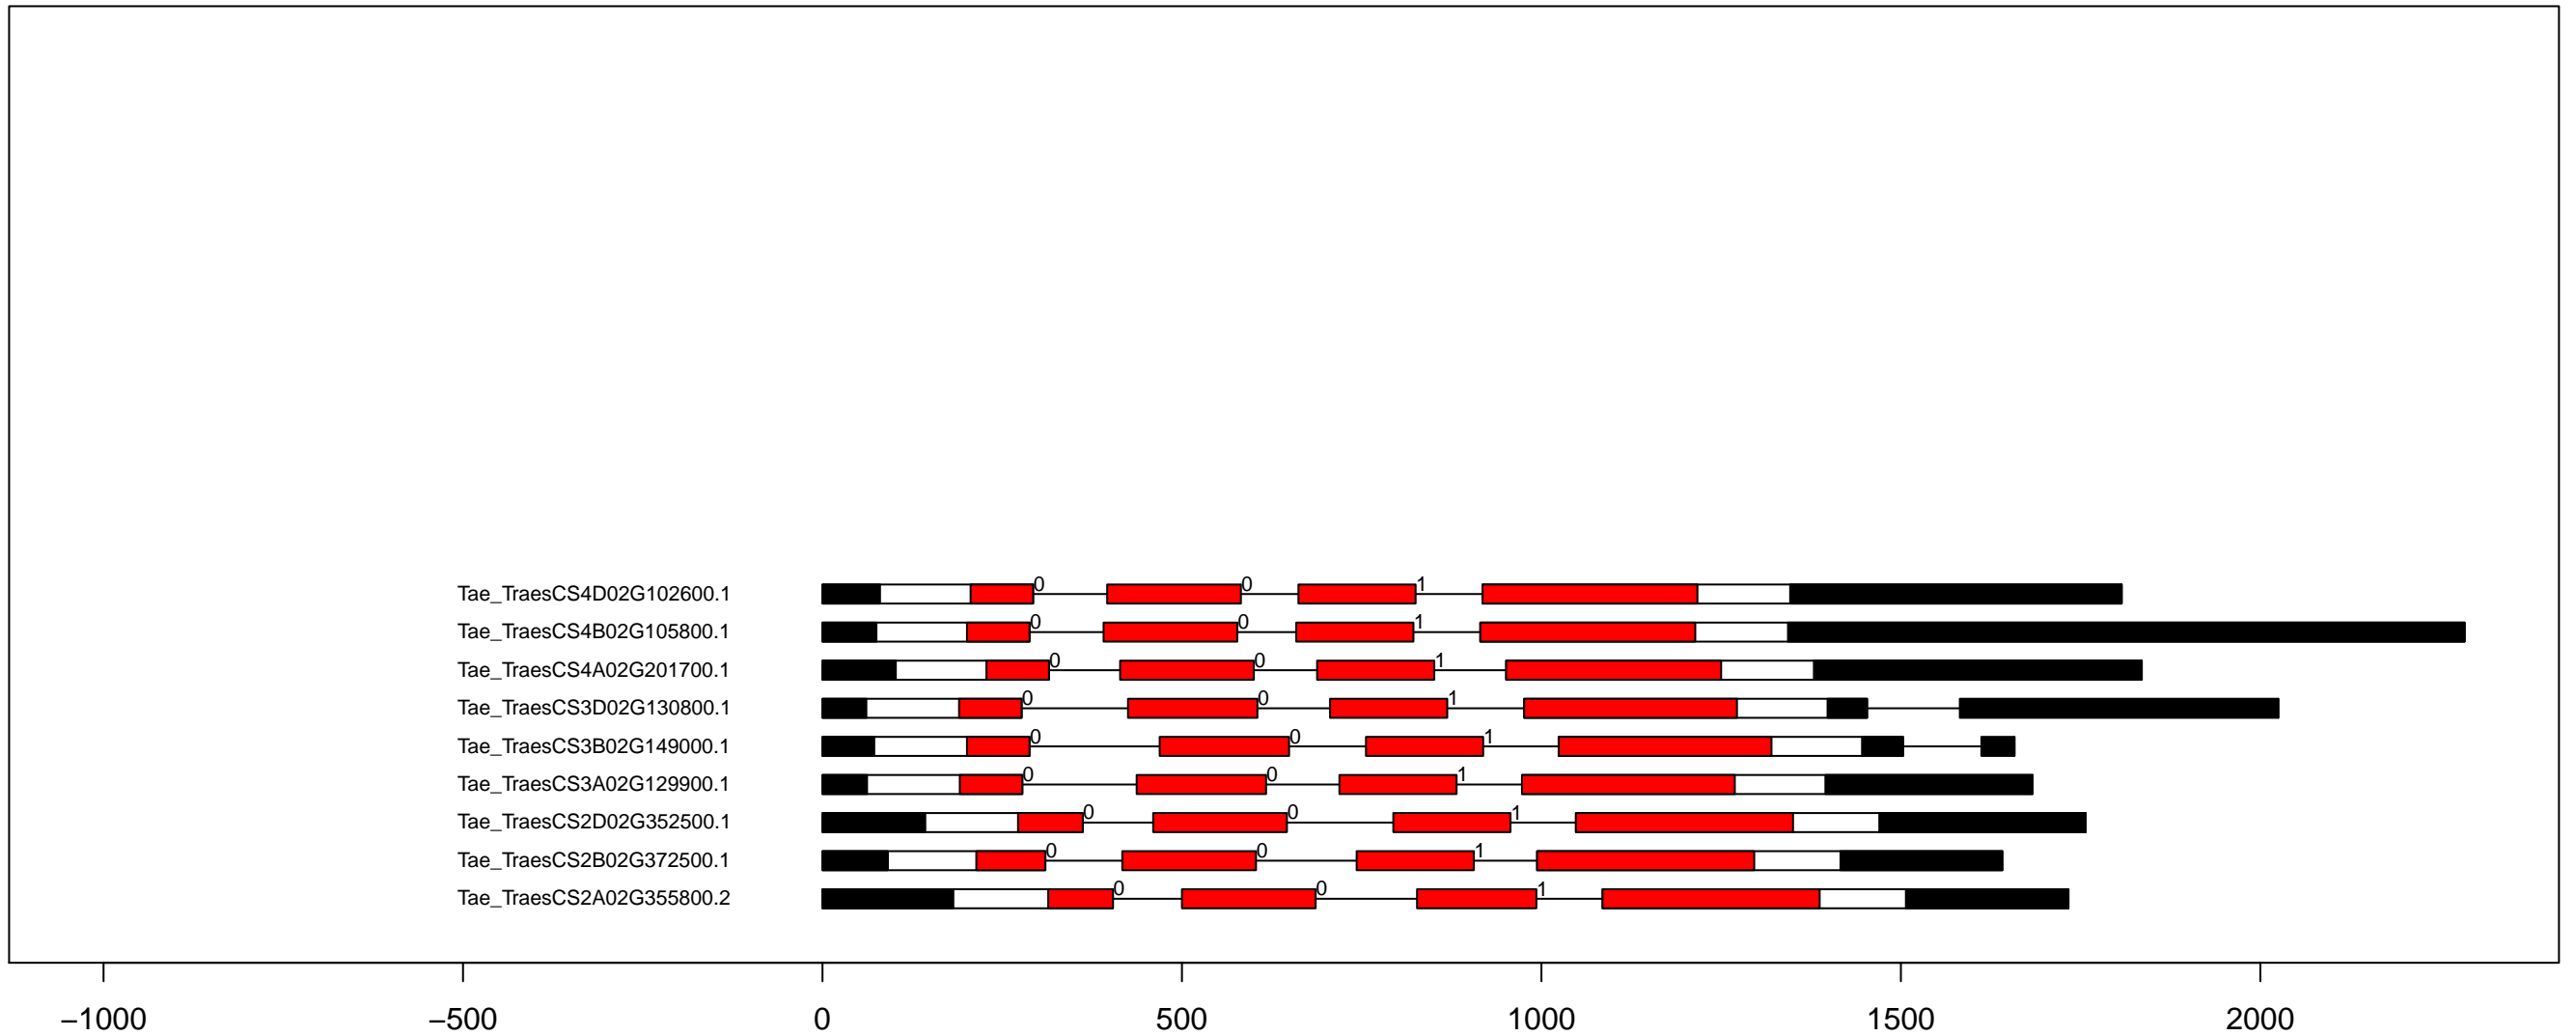

### T.ae class III peroxidase XI subfamily exon-intron and prx domain diagram (all)

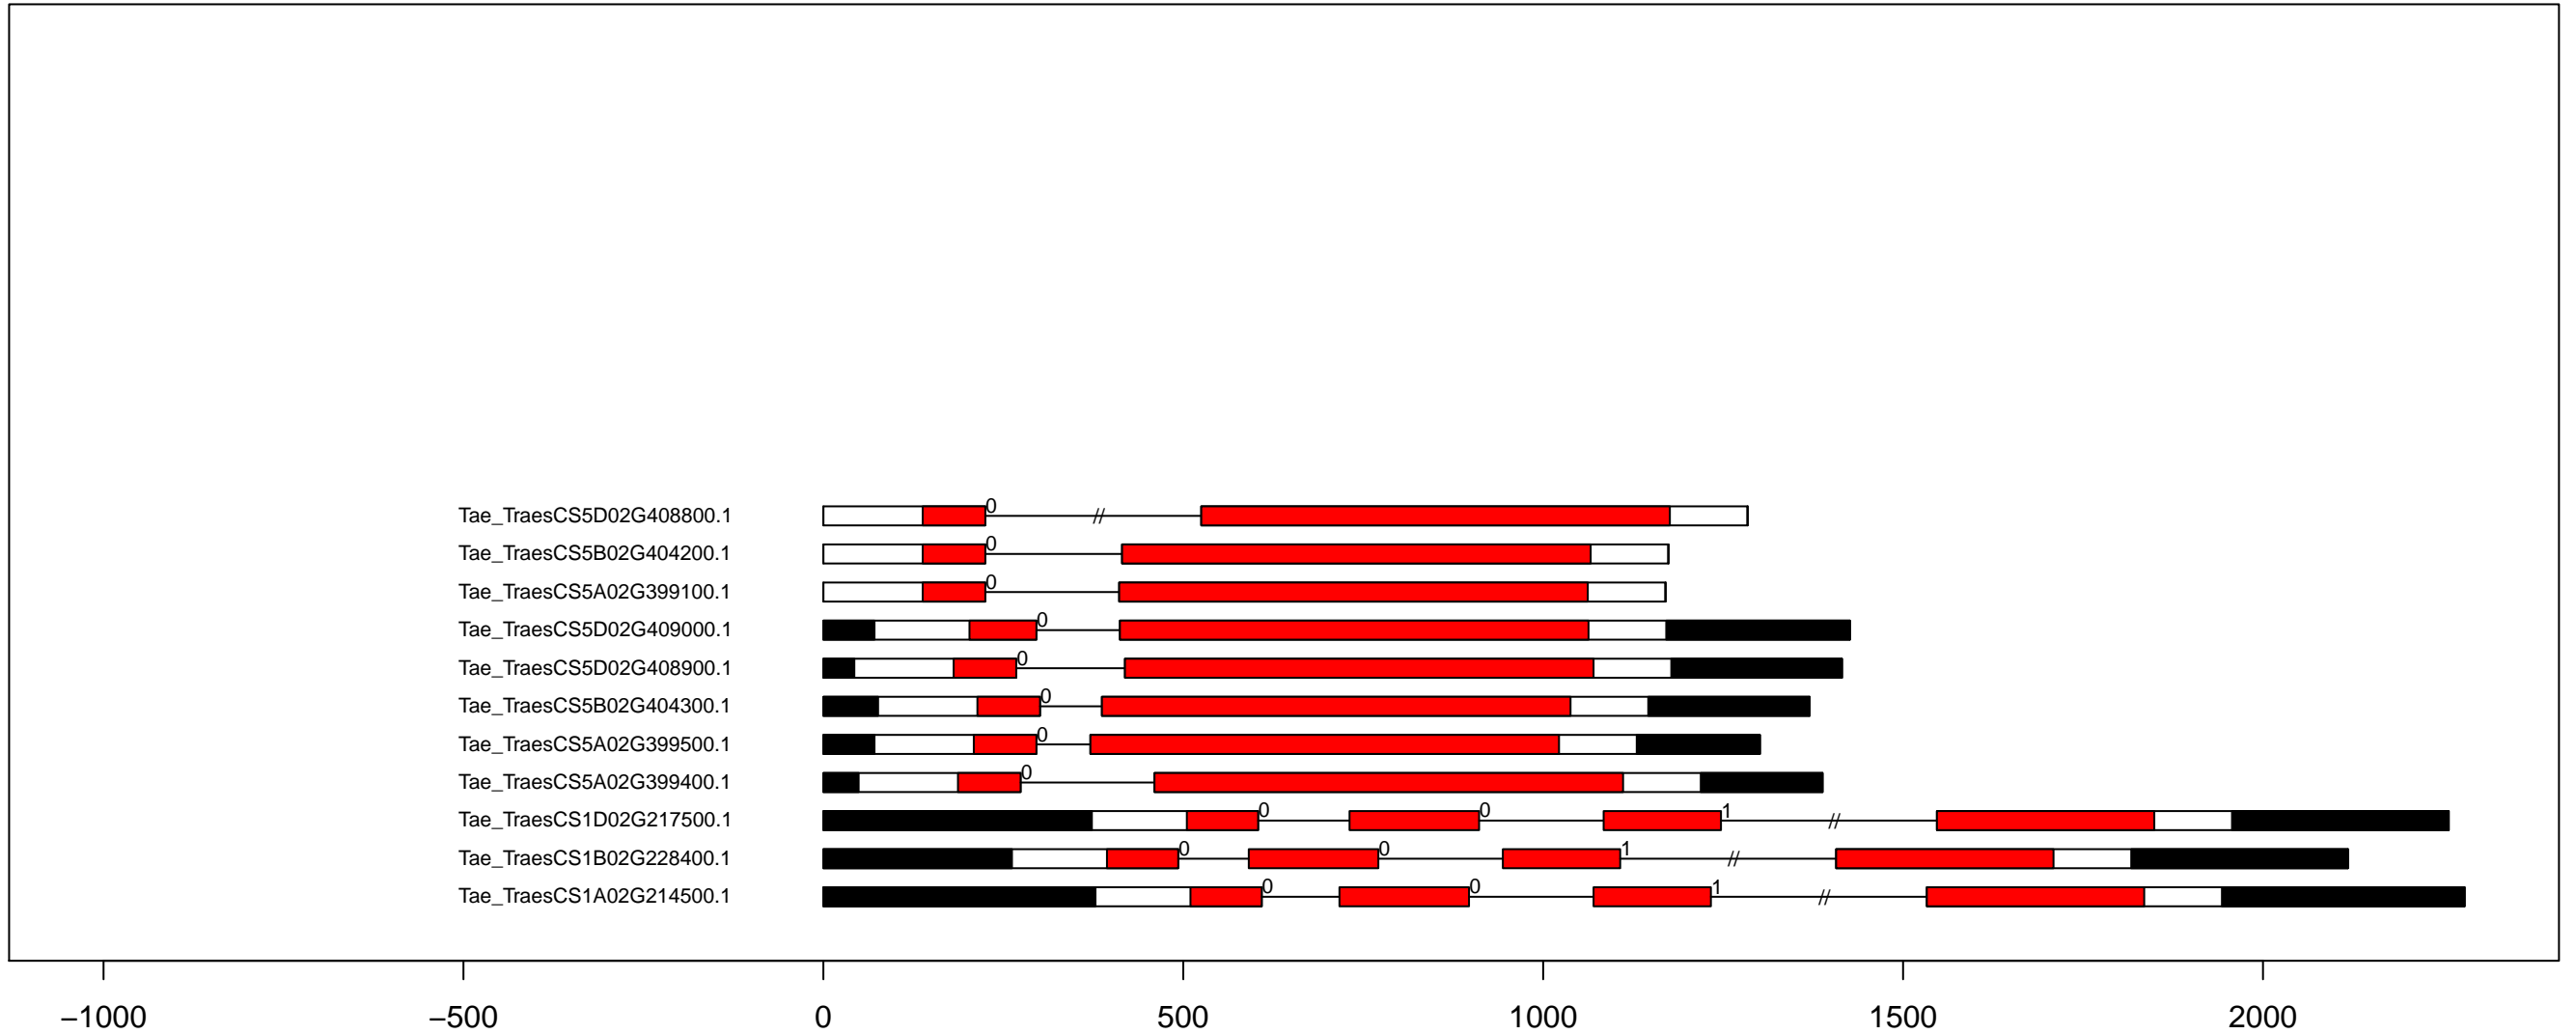

### T.ae class III peroxidase XII subfamily exon-intron and prx domain diagram (part 1)

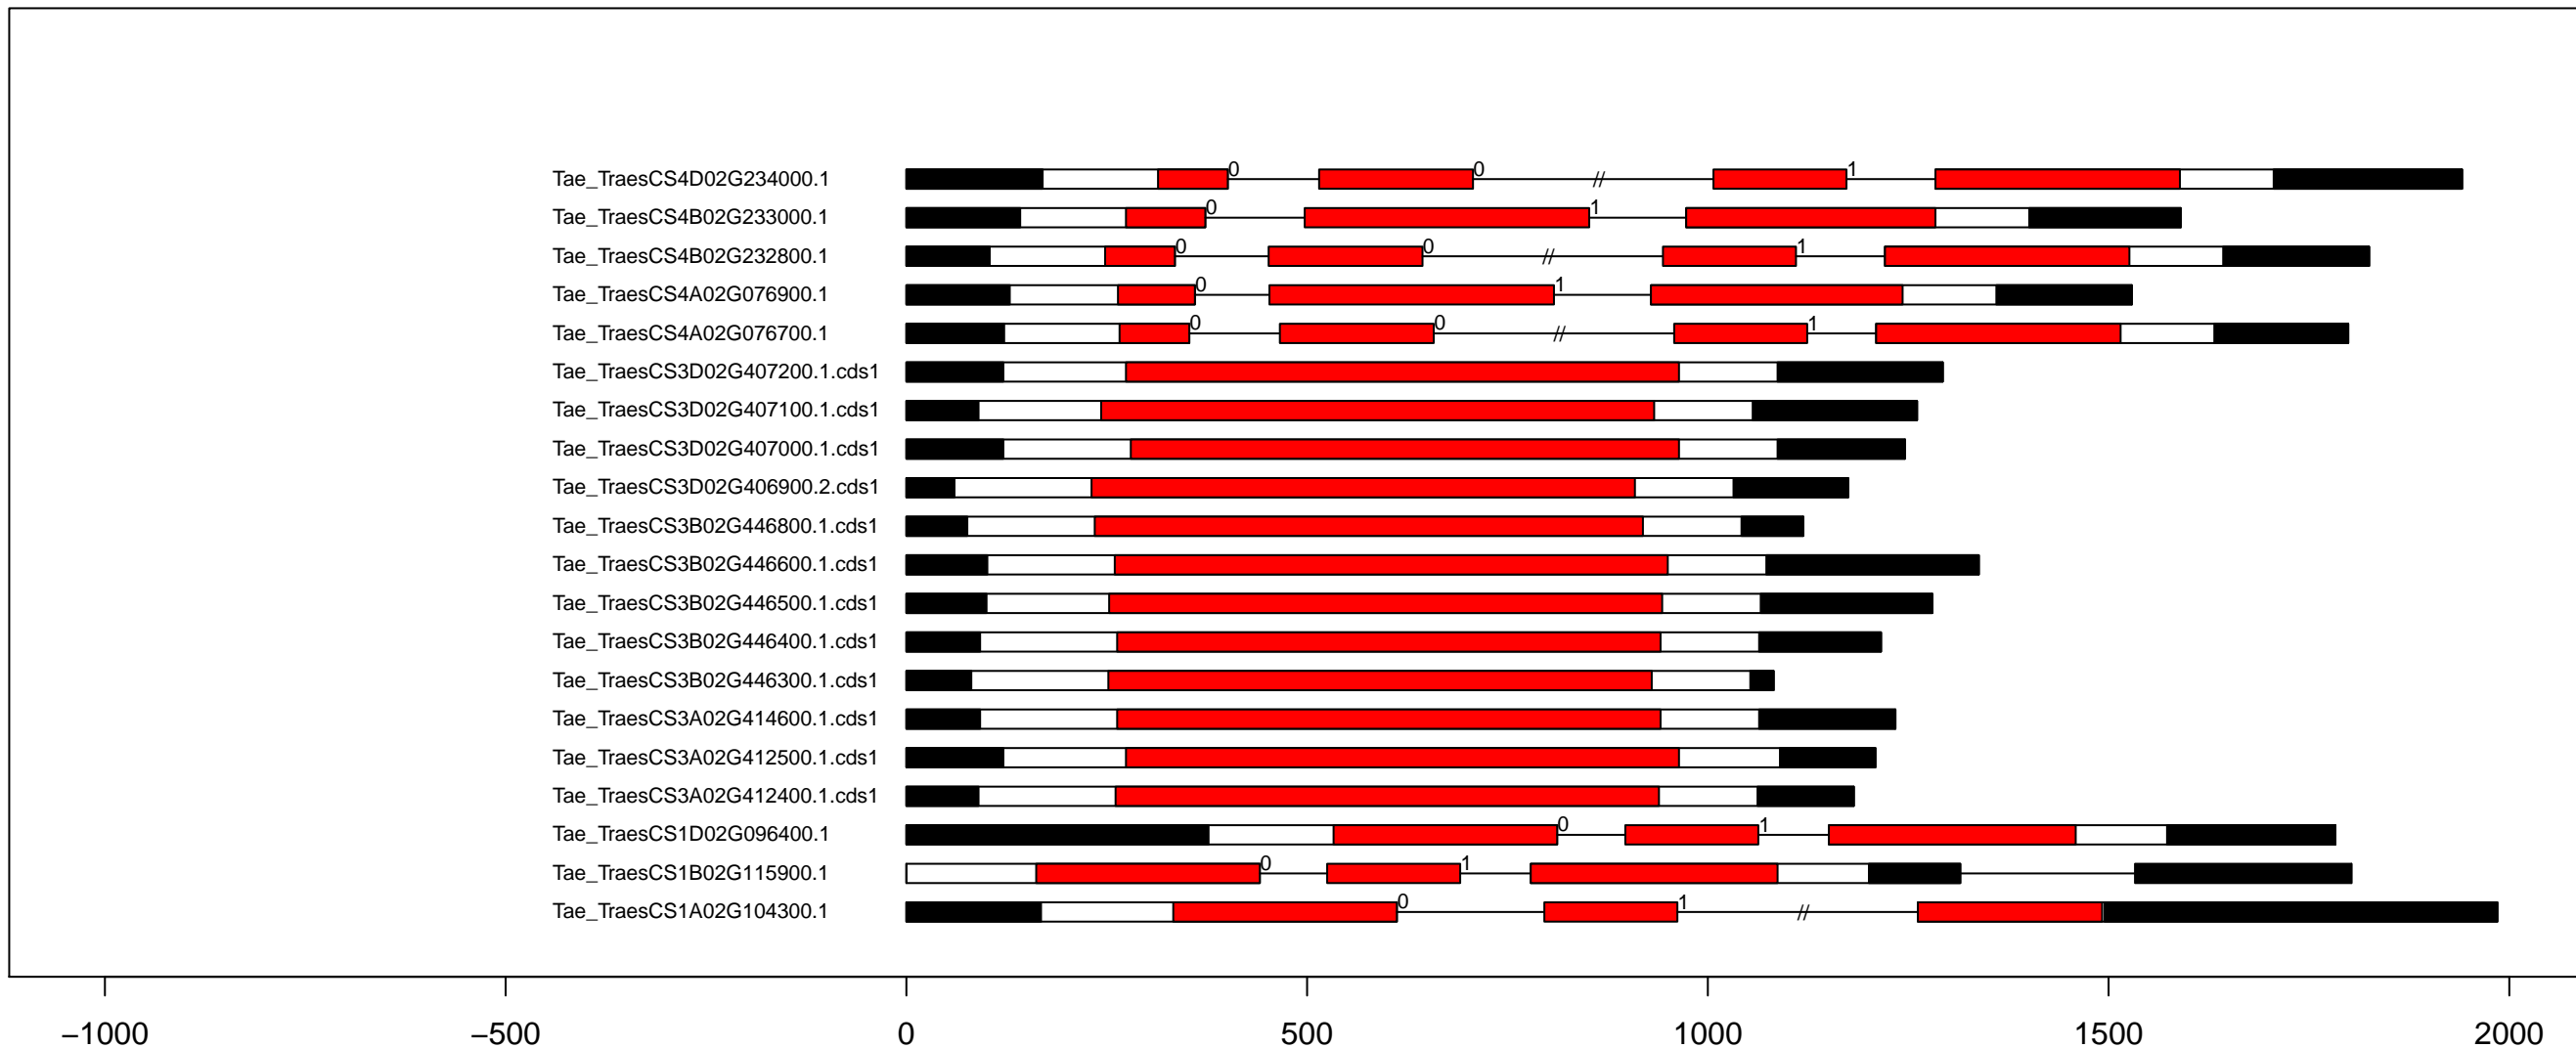

### T.ae class III peroxidase XII subfamily exon-intron and prx domain diagram (part 2)

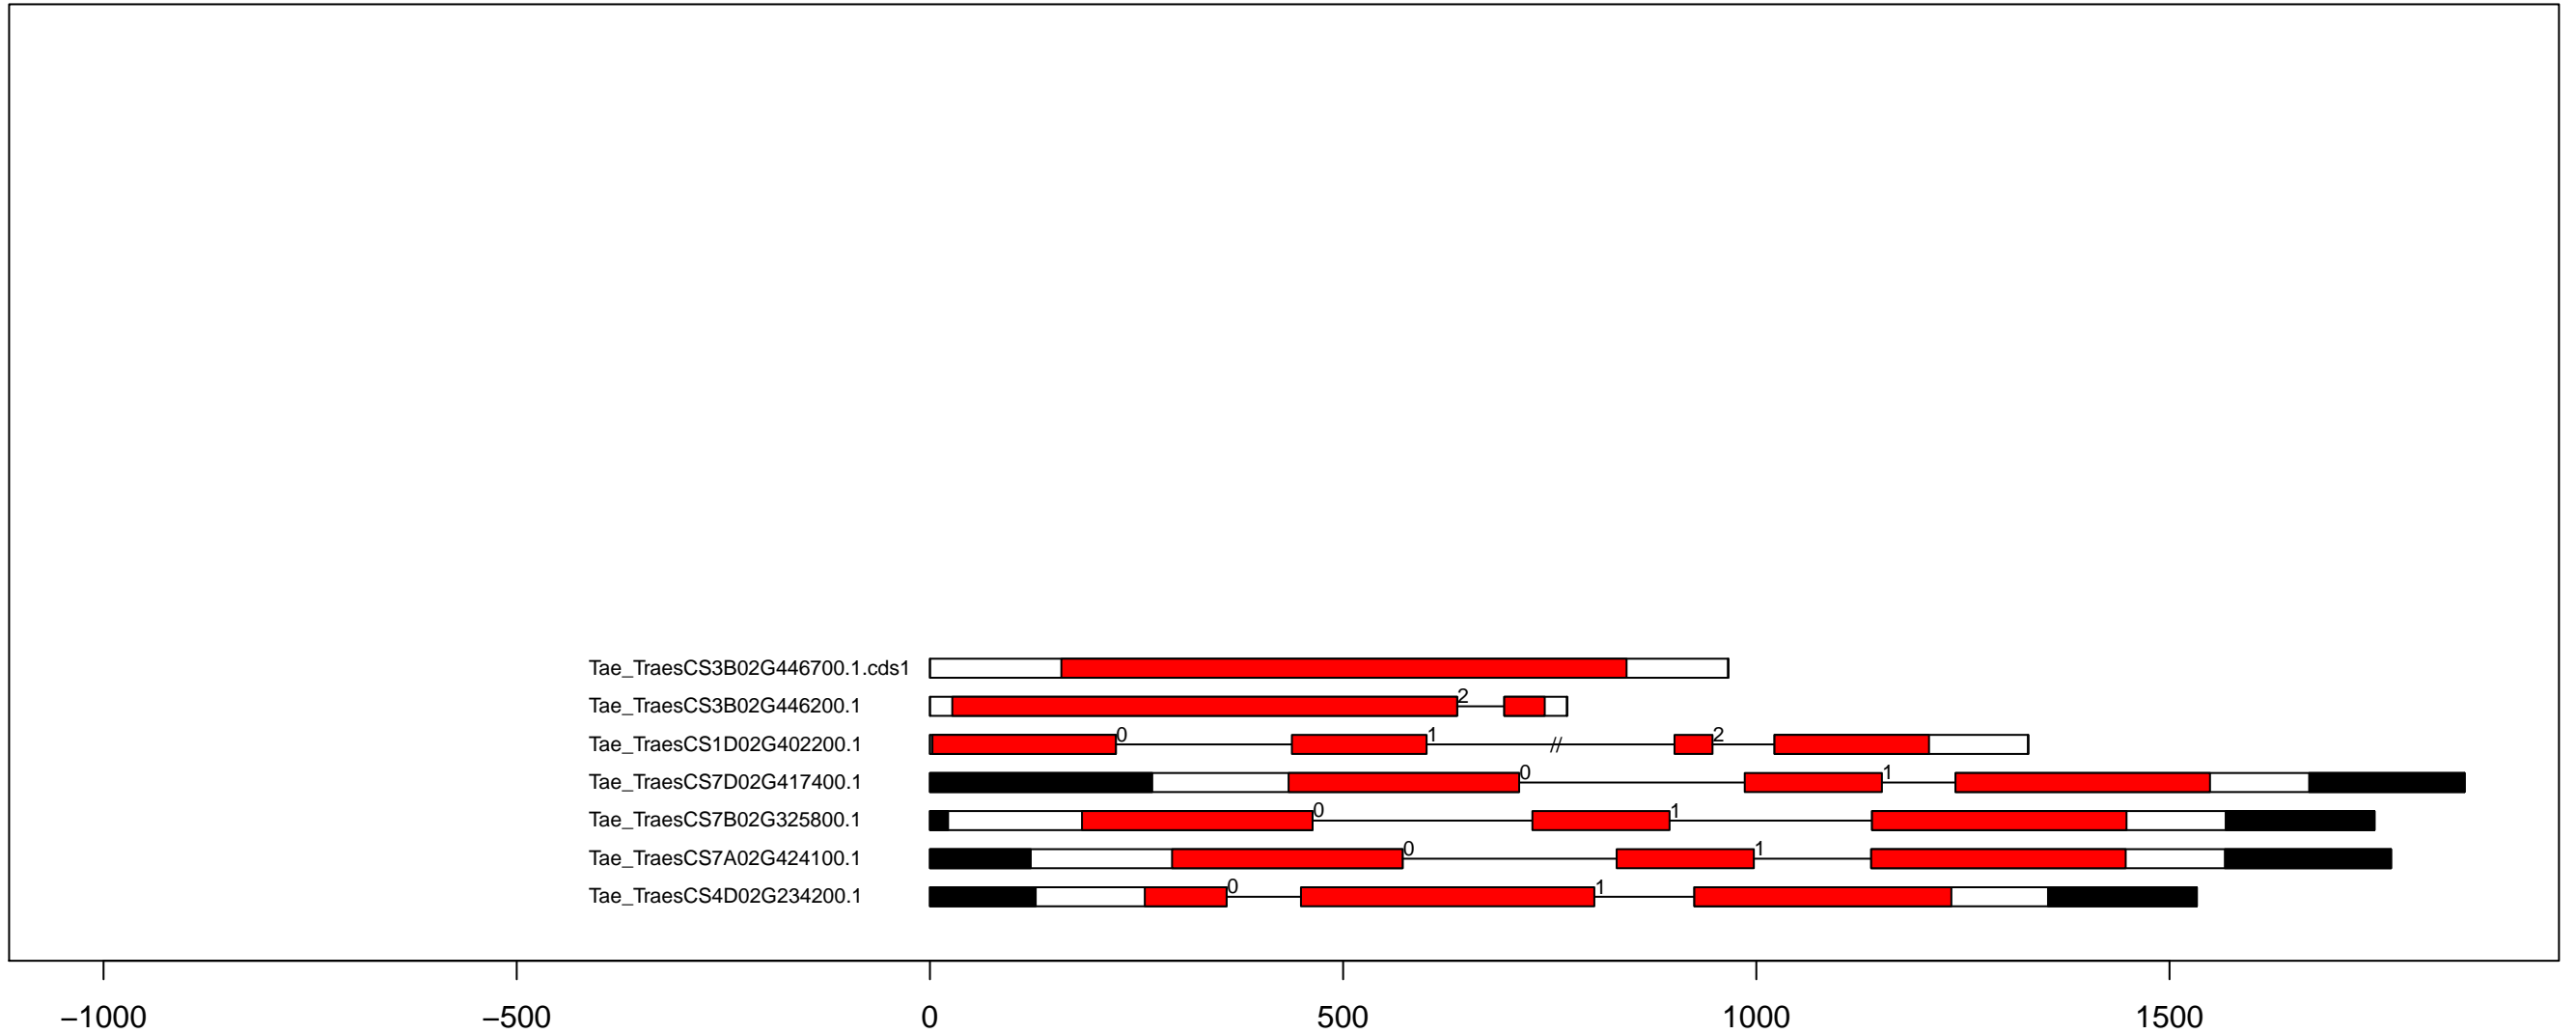

### T.ae class III peroxidase XIII subfamily exon-intron and prx domain diagram (all)

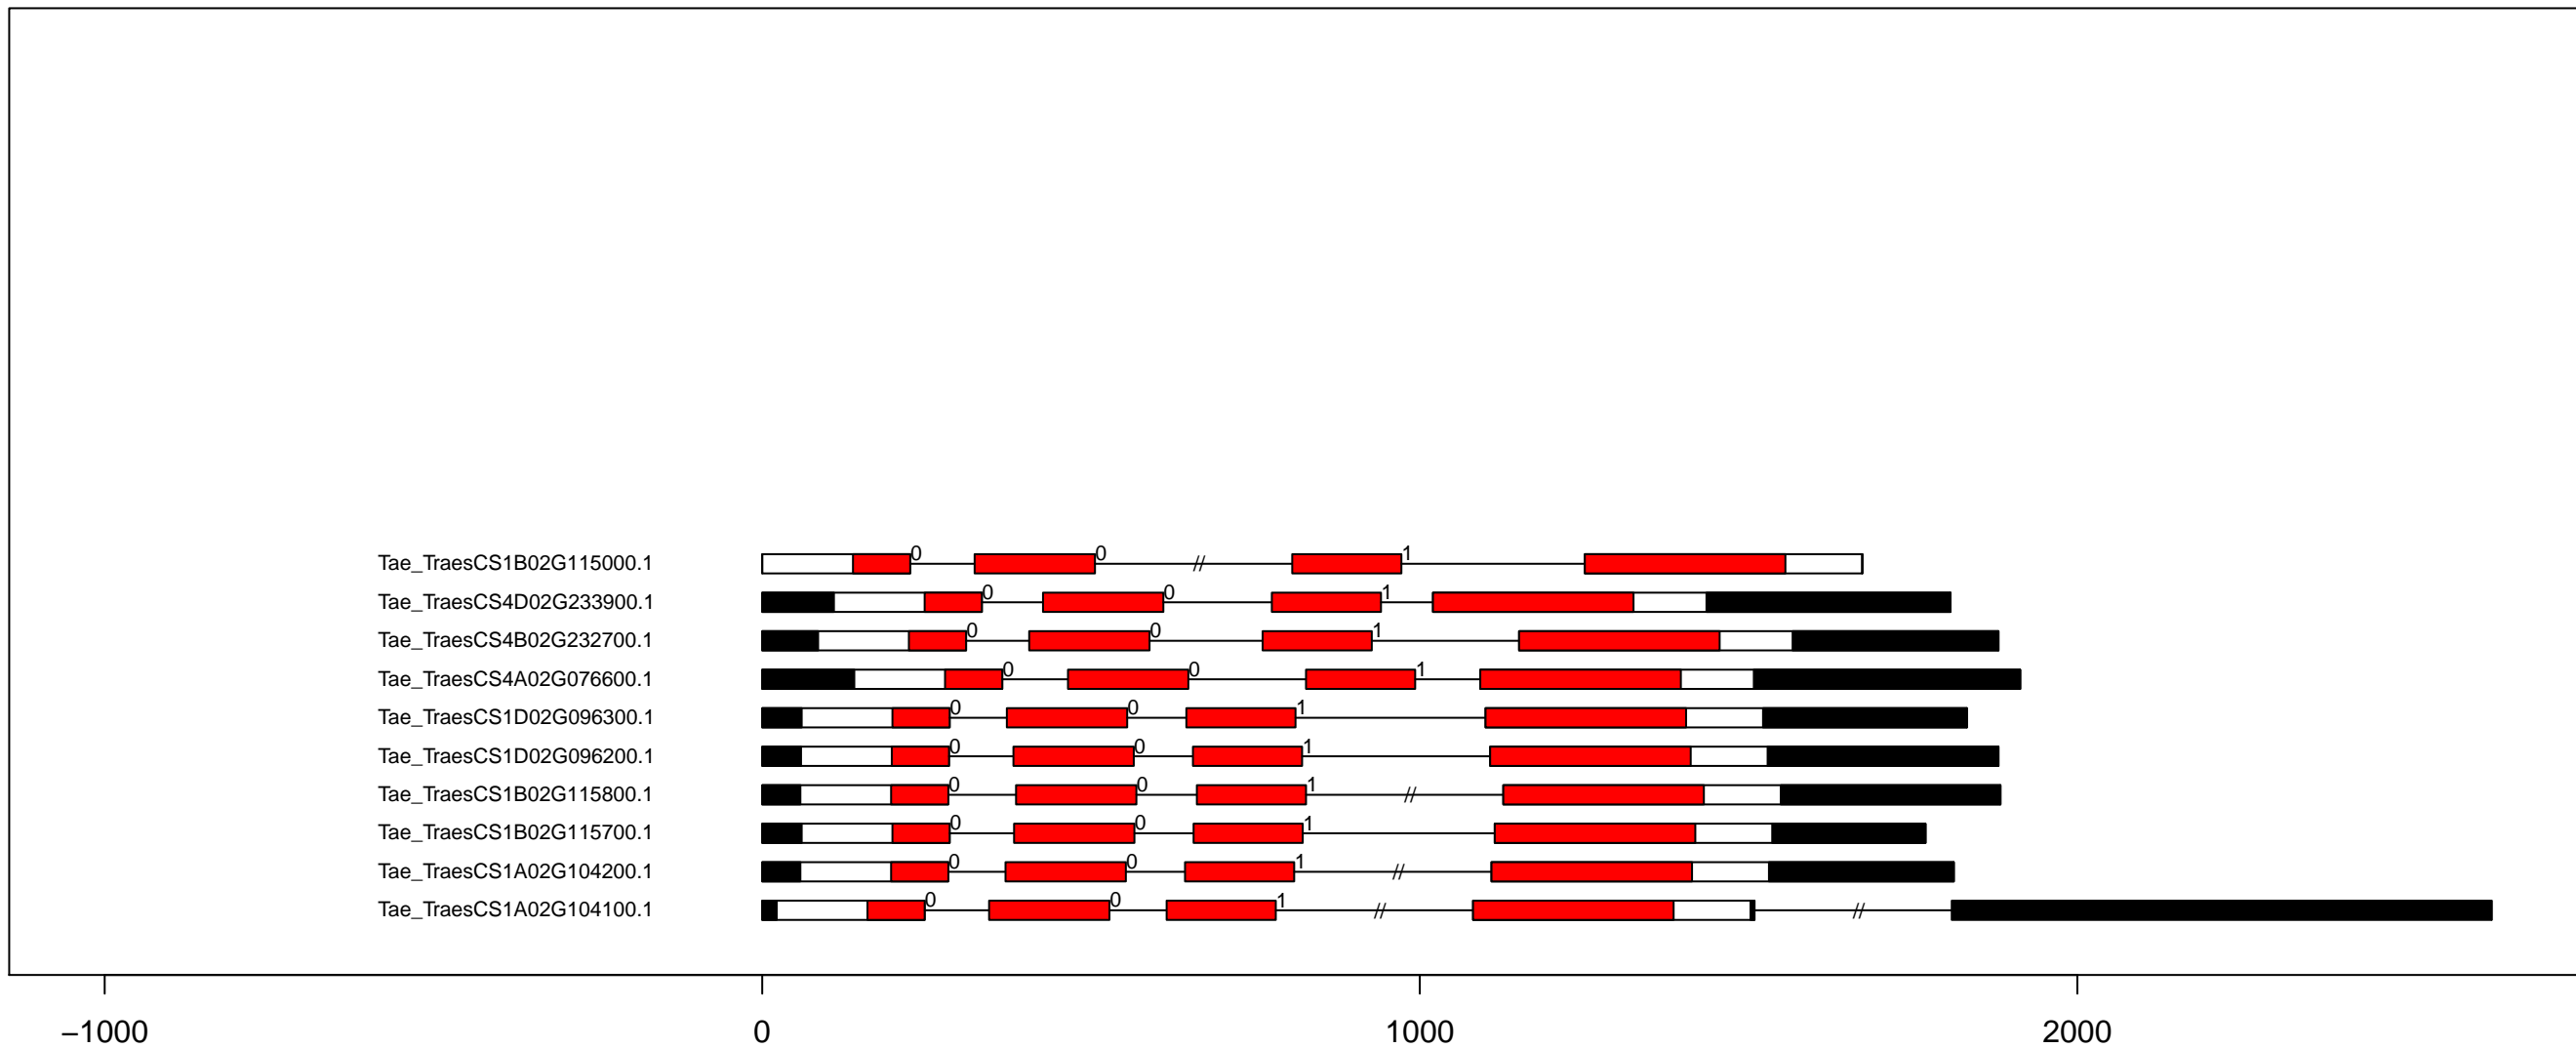

### T.ae class III peroxidase XIV subfamily exon-intron and prx domain diagram (part 1)

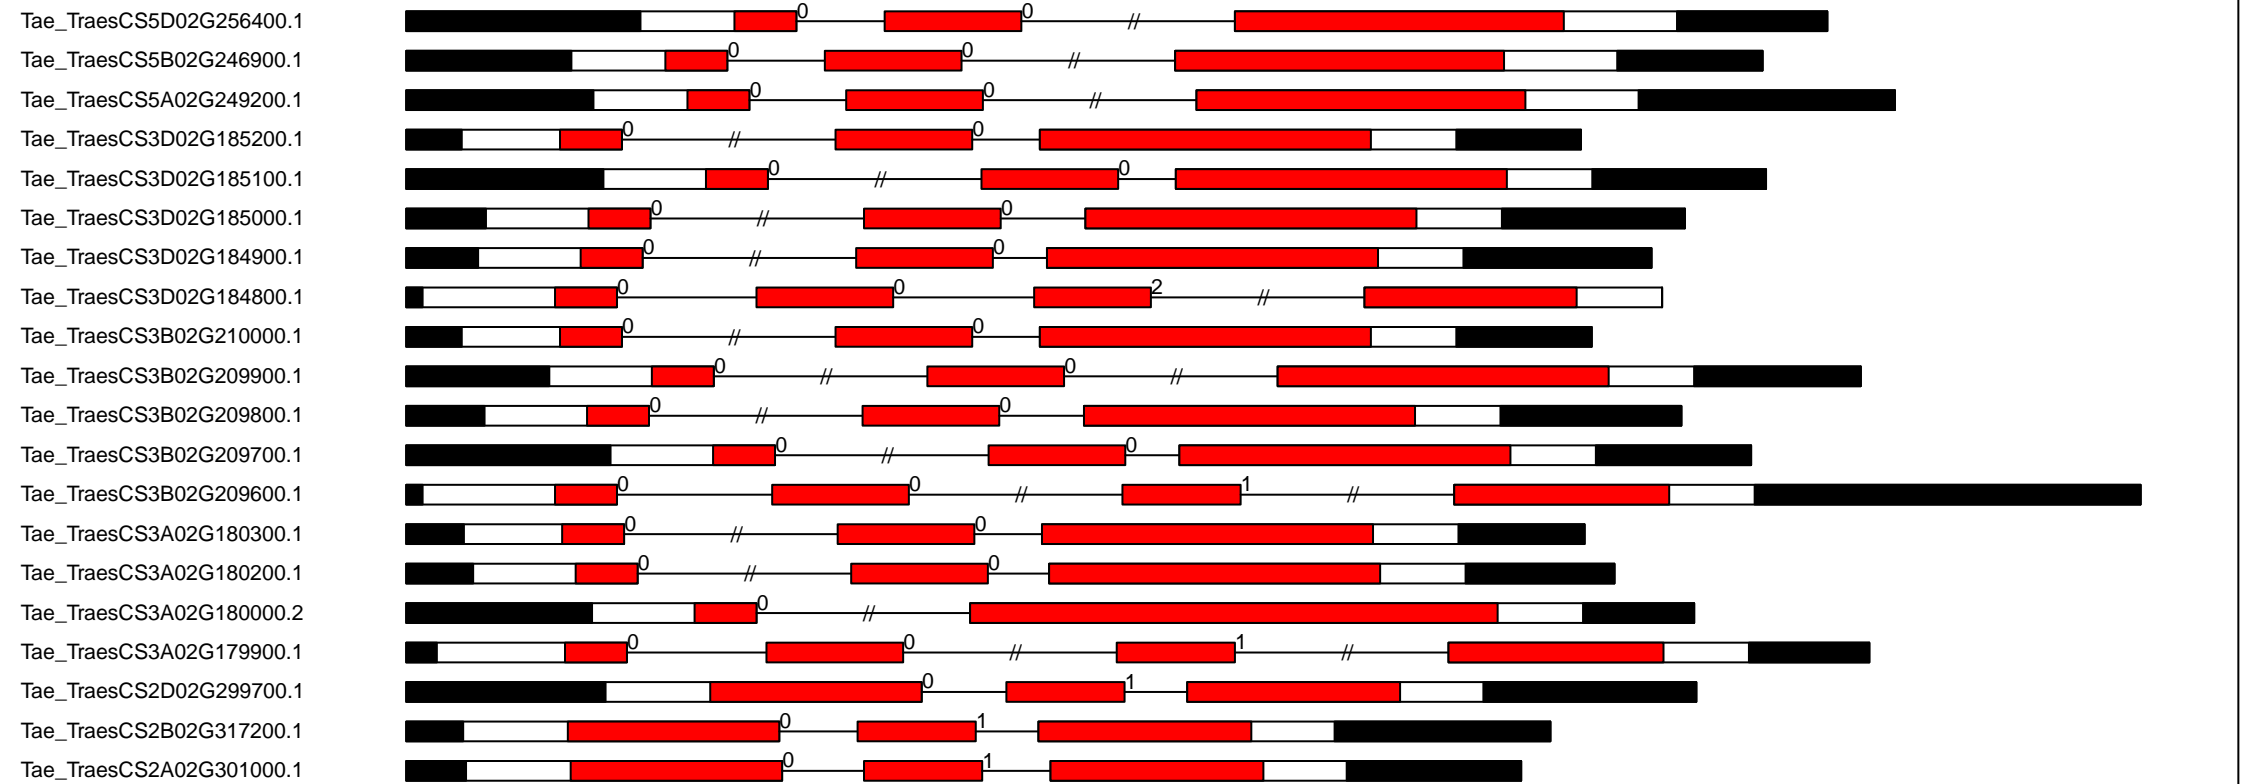



# T.ae class III peroxidase XIV subfamily exon-intron and prx domain diagram (part 2)

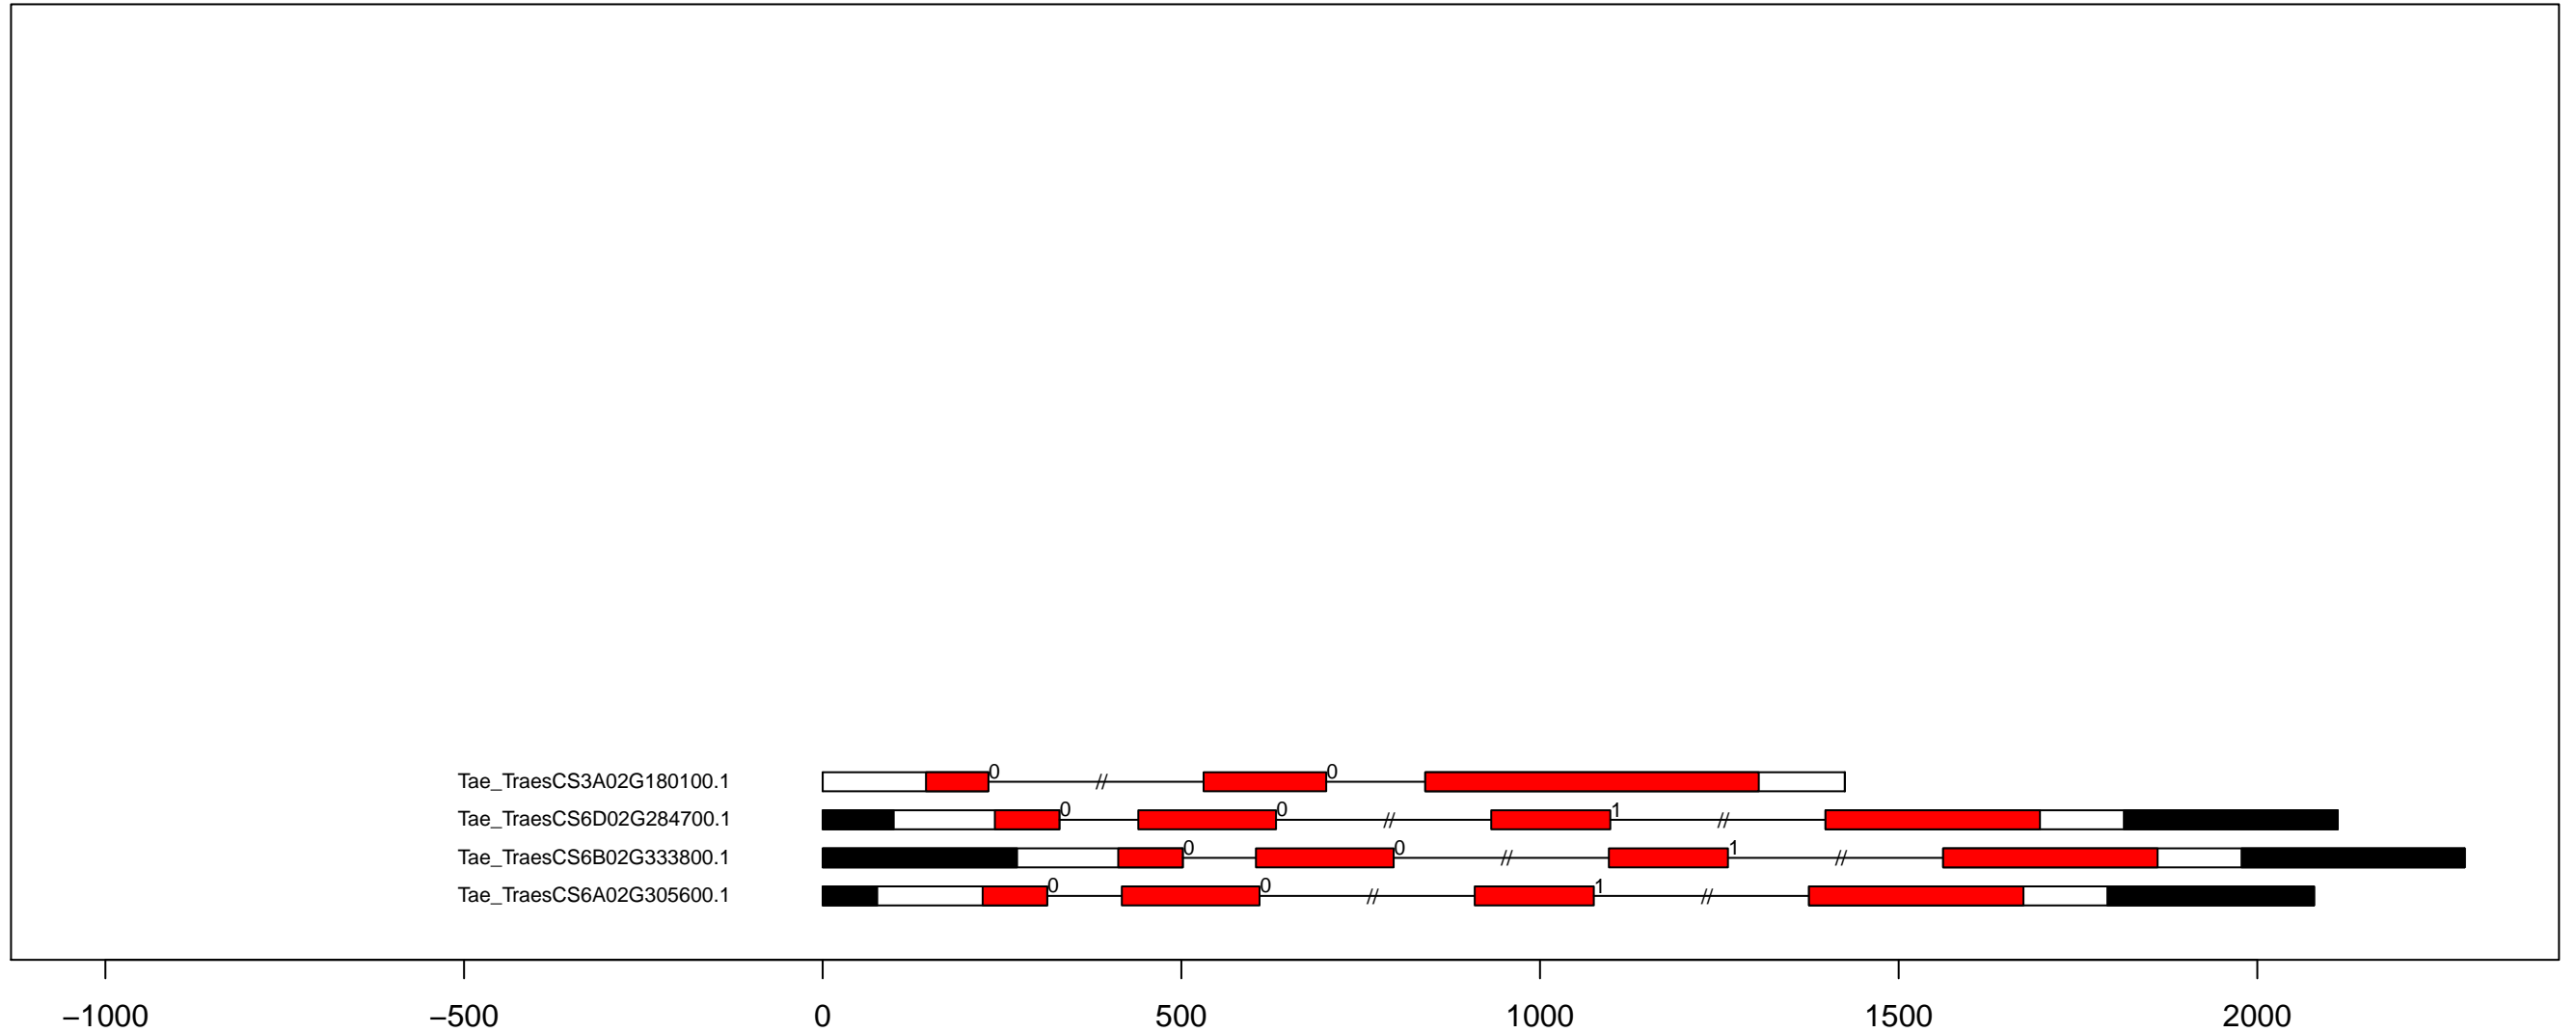

### T.ae class III peroxidase XV subfamily exon-intron and prx domain diagram (all)

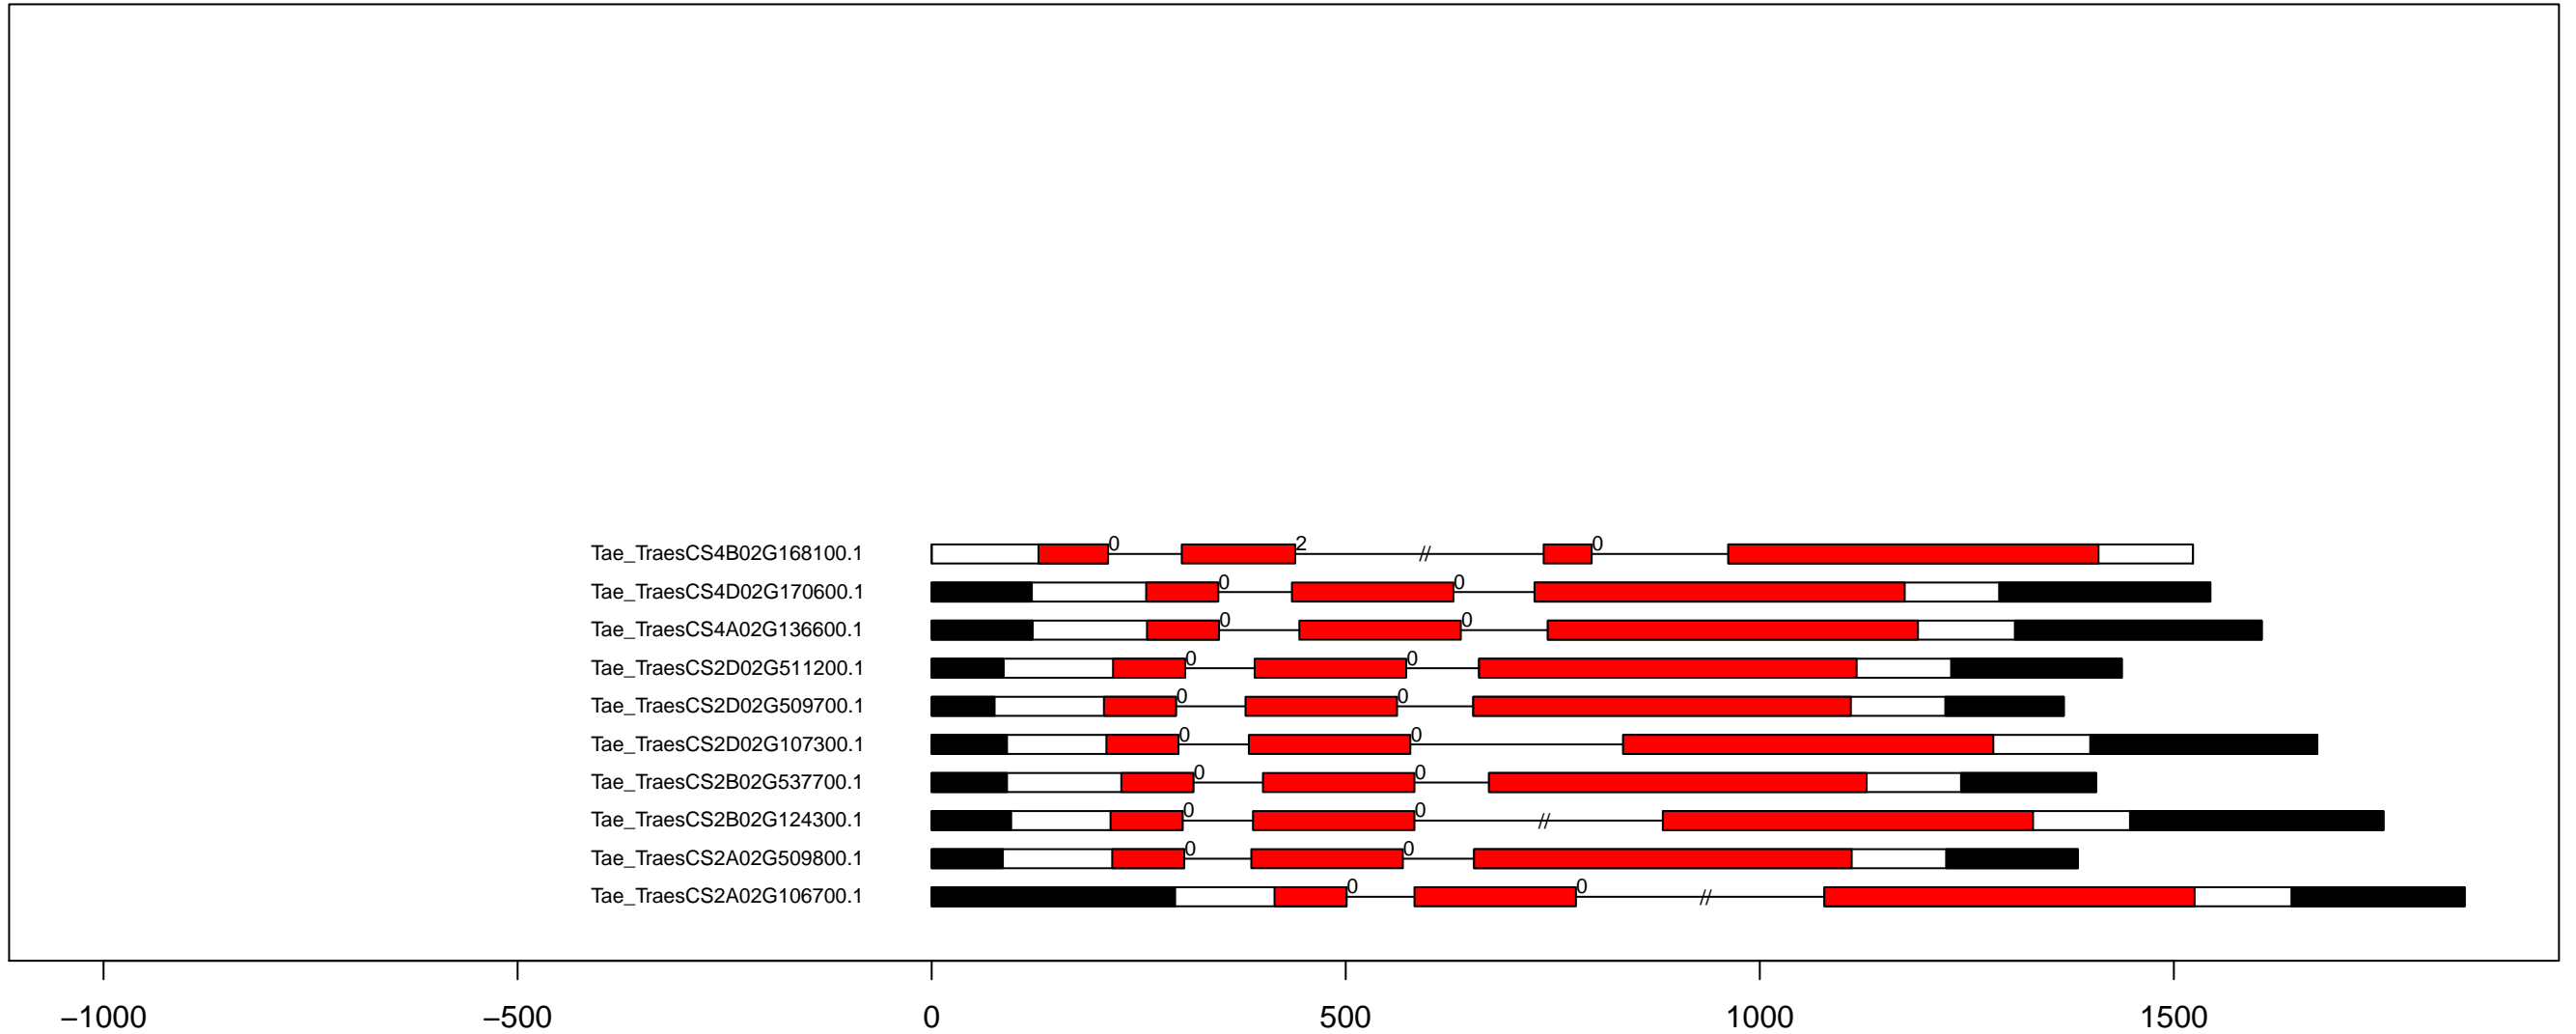

### T.ae class III peroxidase XVI subfamily exon-intron and prx domain diagram (part 1)

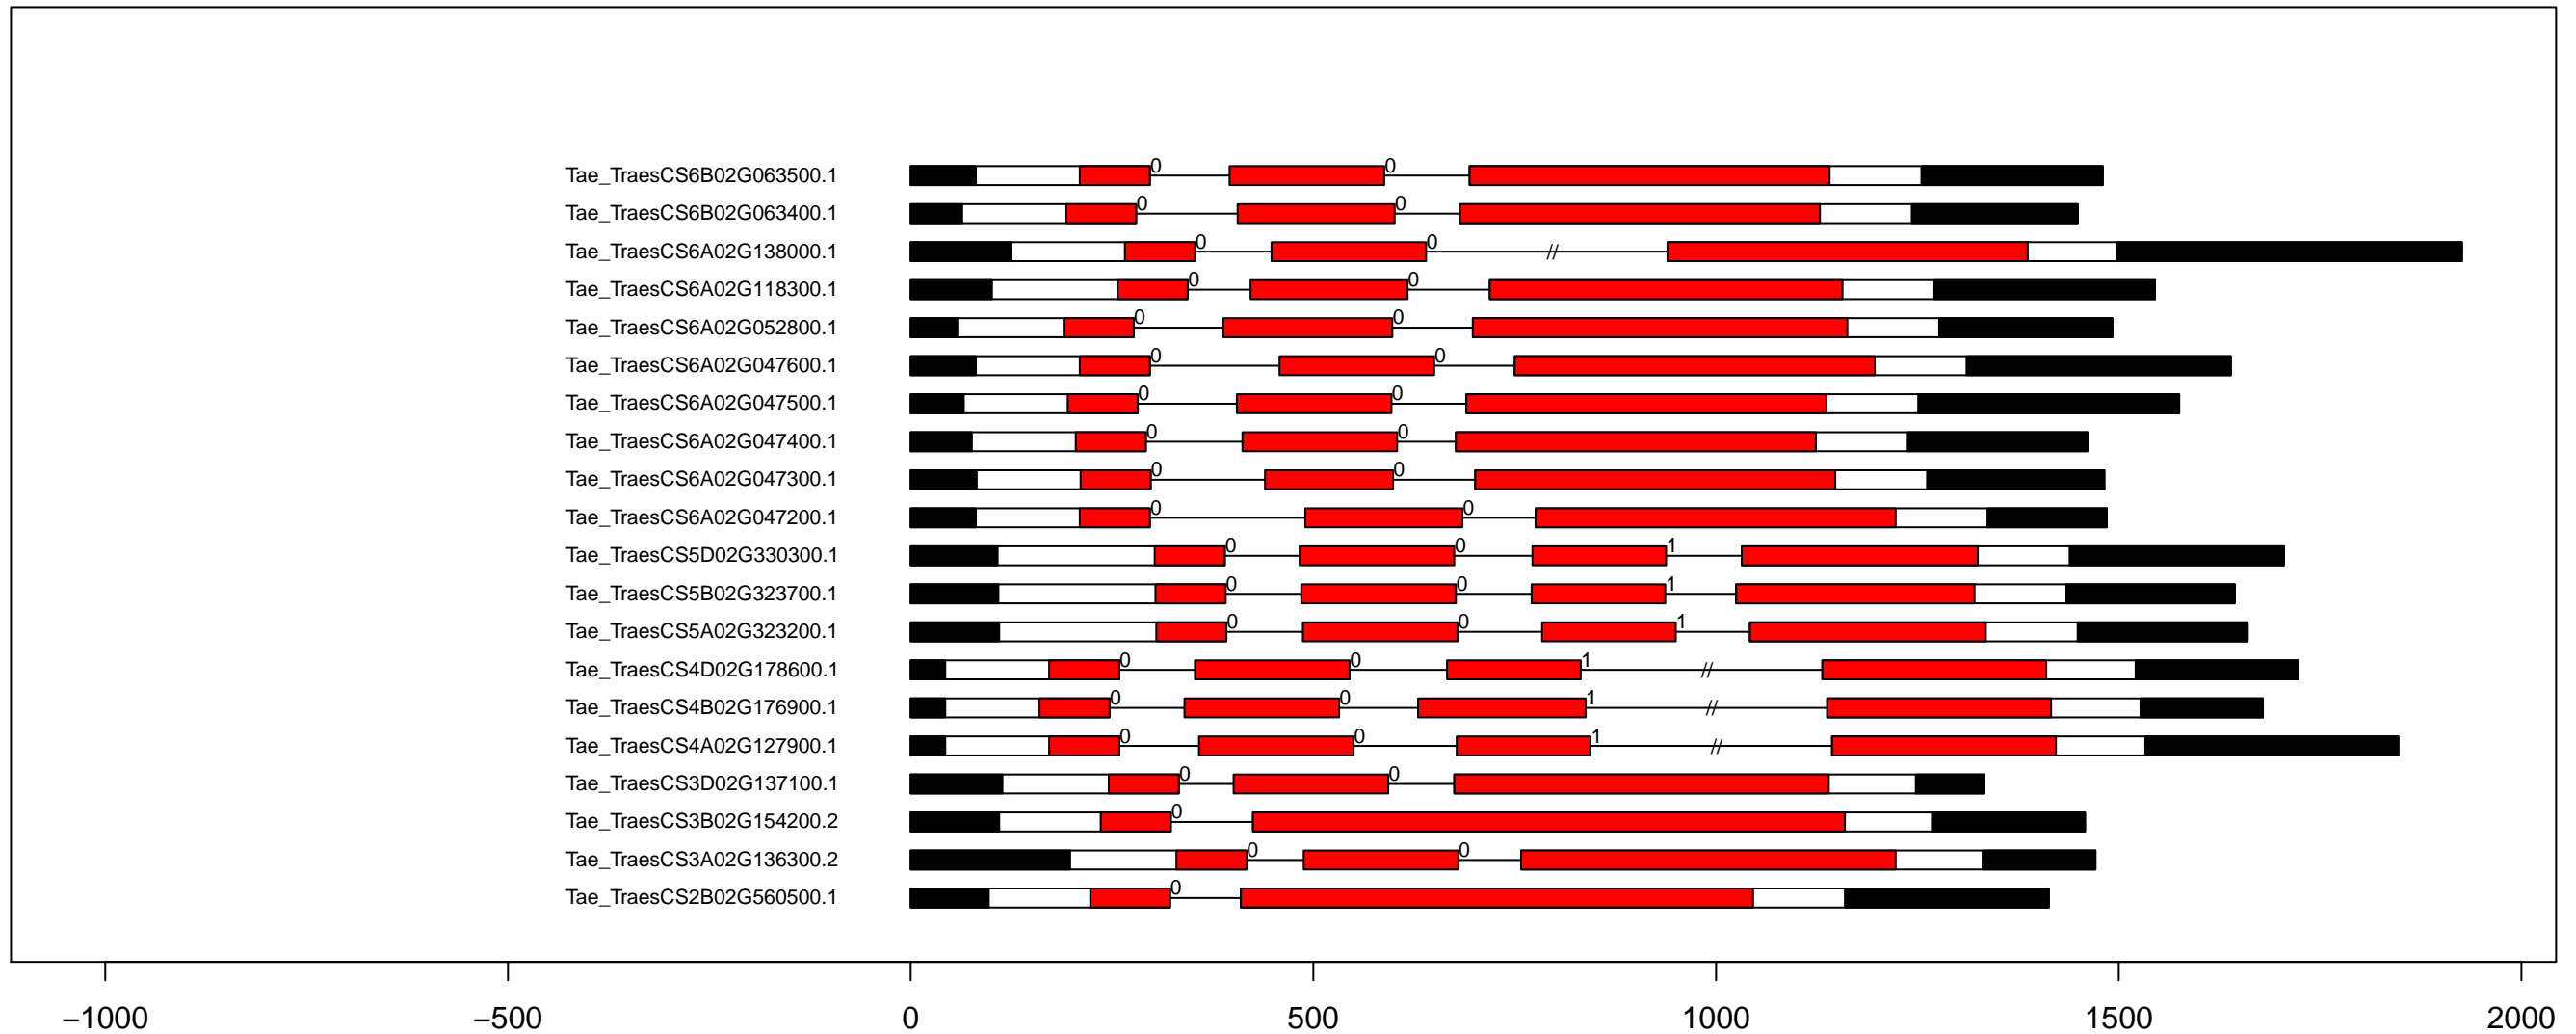

## T.ae class III peroxidase XVI subfamily exon-intron and prx domain diagram (part 2)

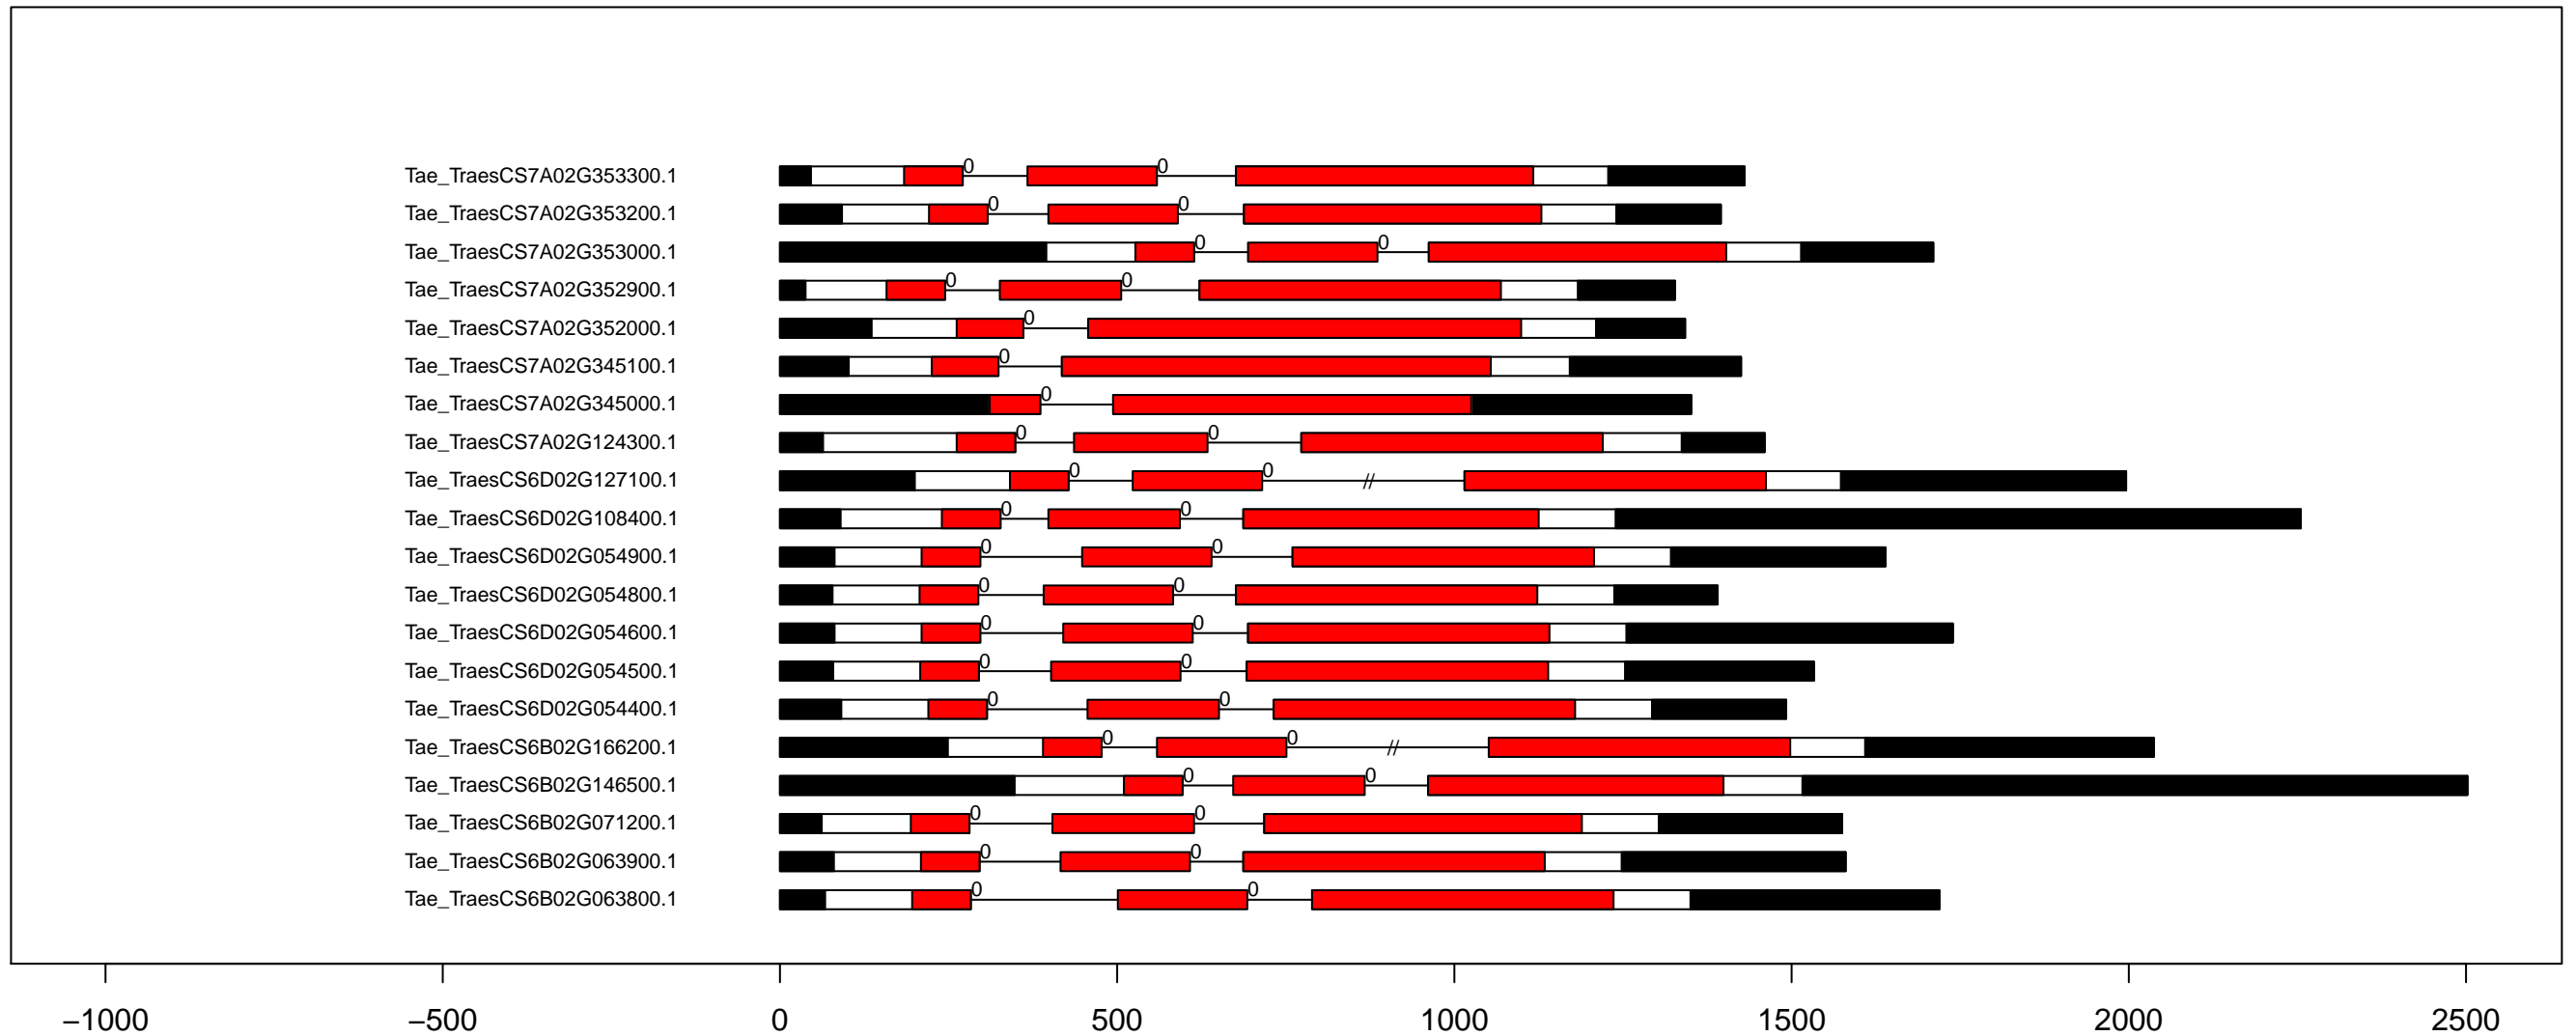

### T.ae class III peroxidase XVI subfamily exon-intron and prx domain diagram (part 3)

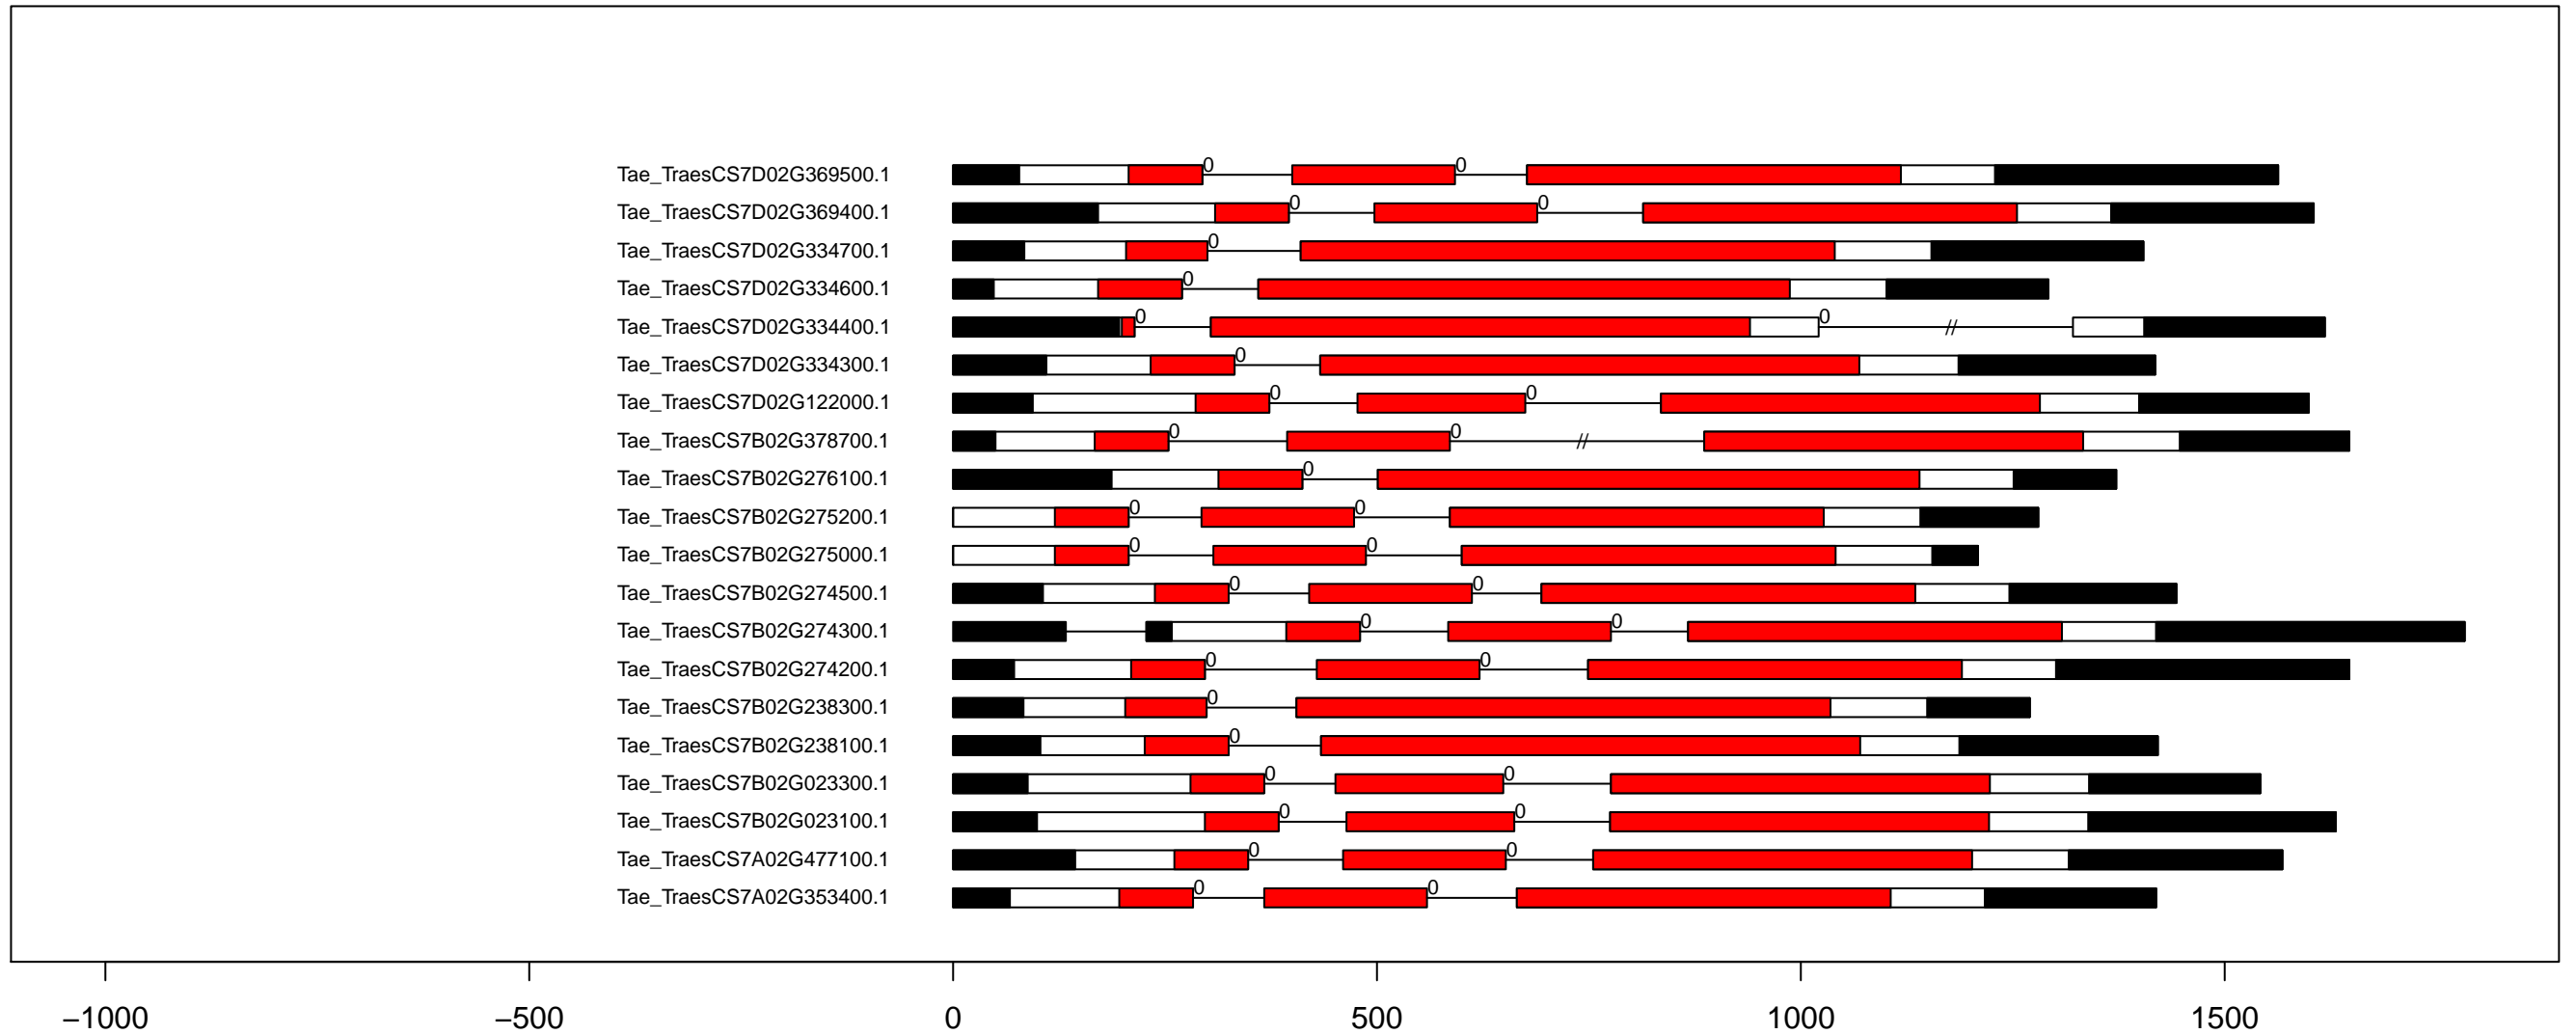

### T.ae class III peroxidase XVI subfamily exon-intron and prx domain diagram (part 4)

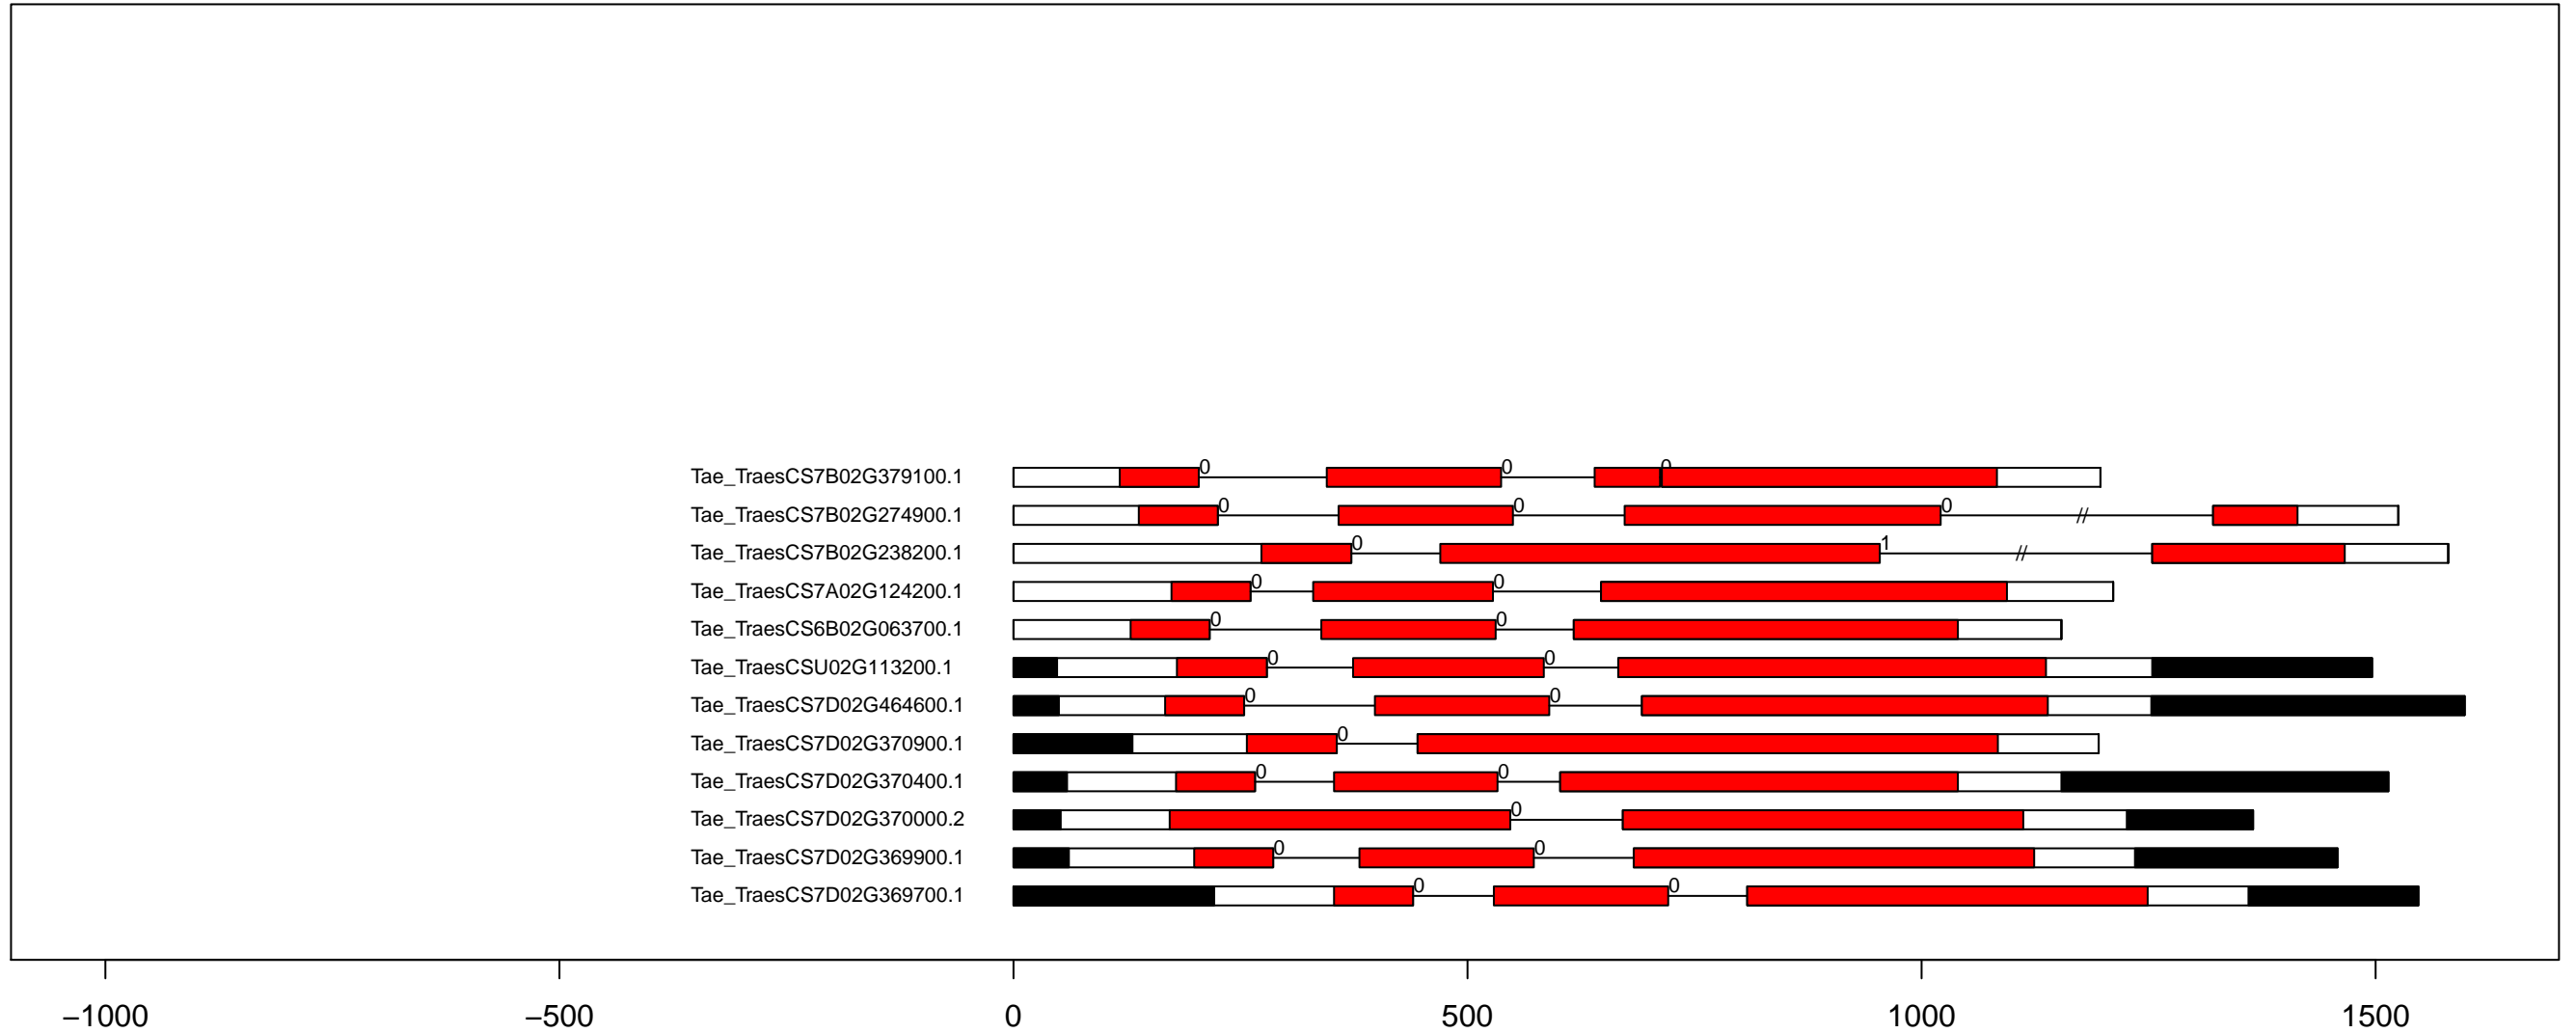

### T.ae class III peroxidase XVII subfamily exon-intron and prx domain diagram (part 1)

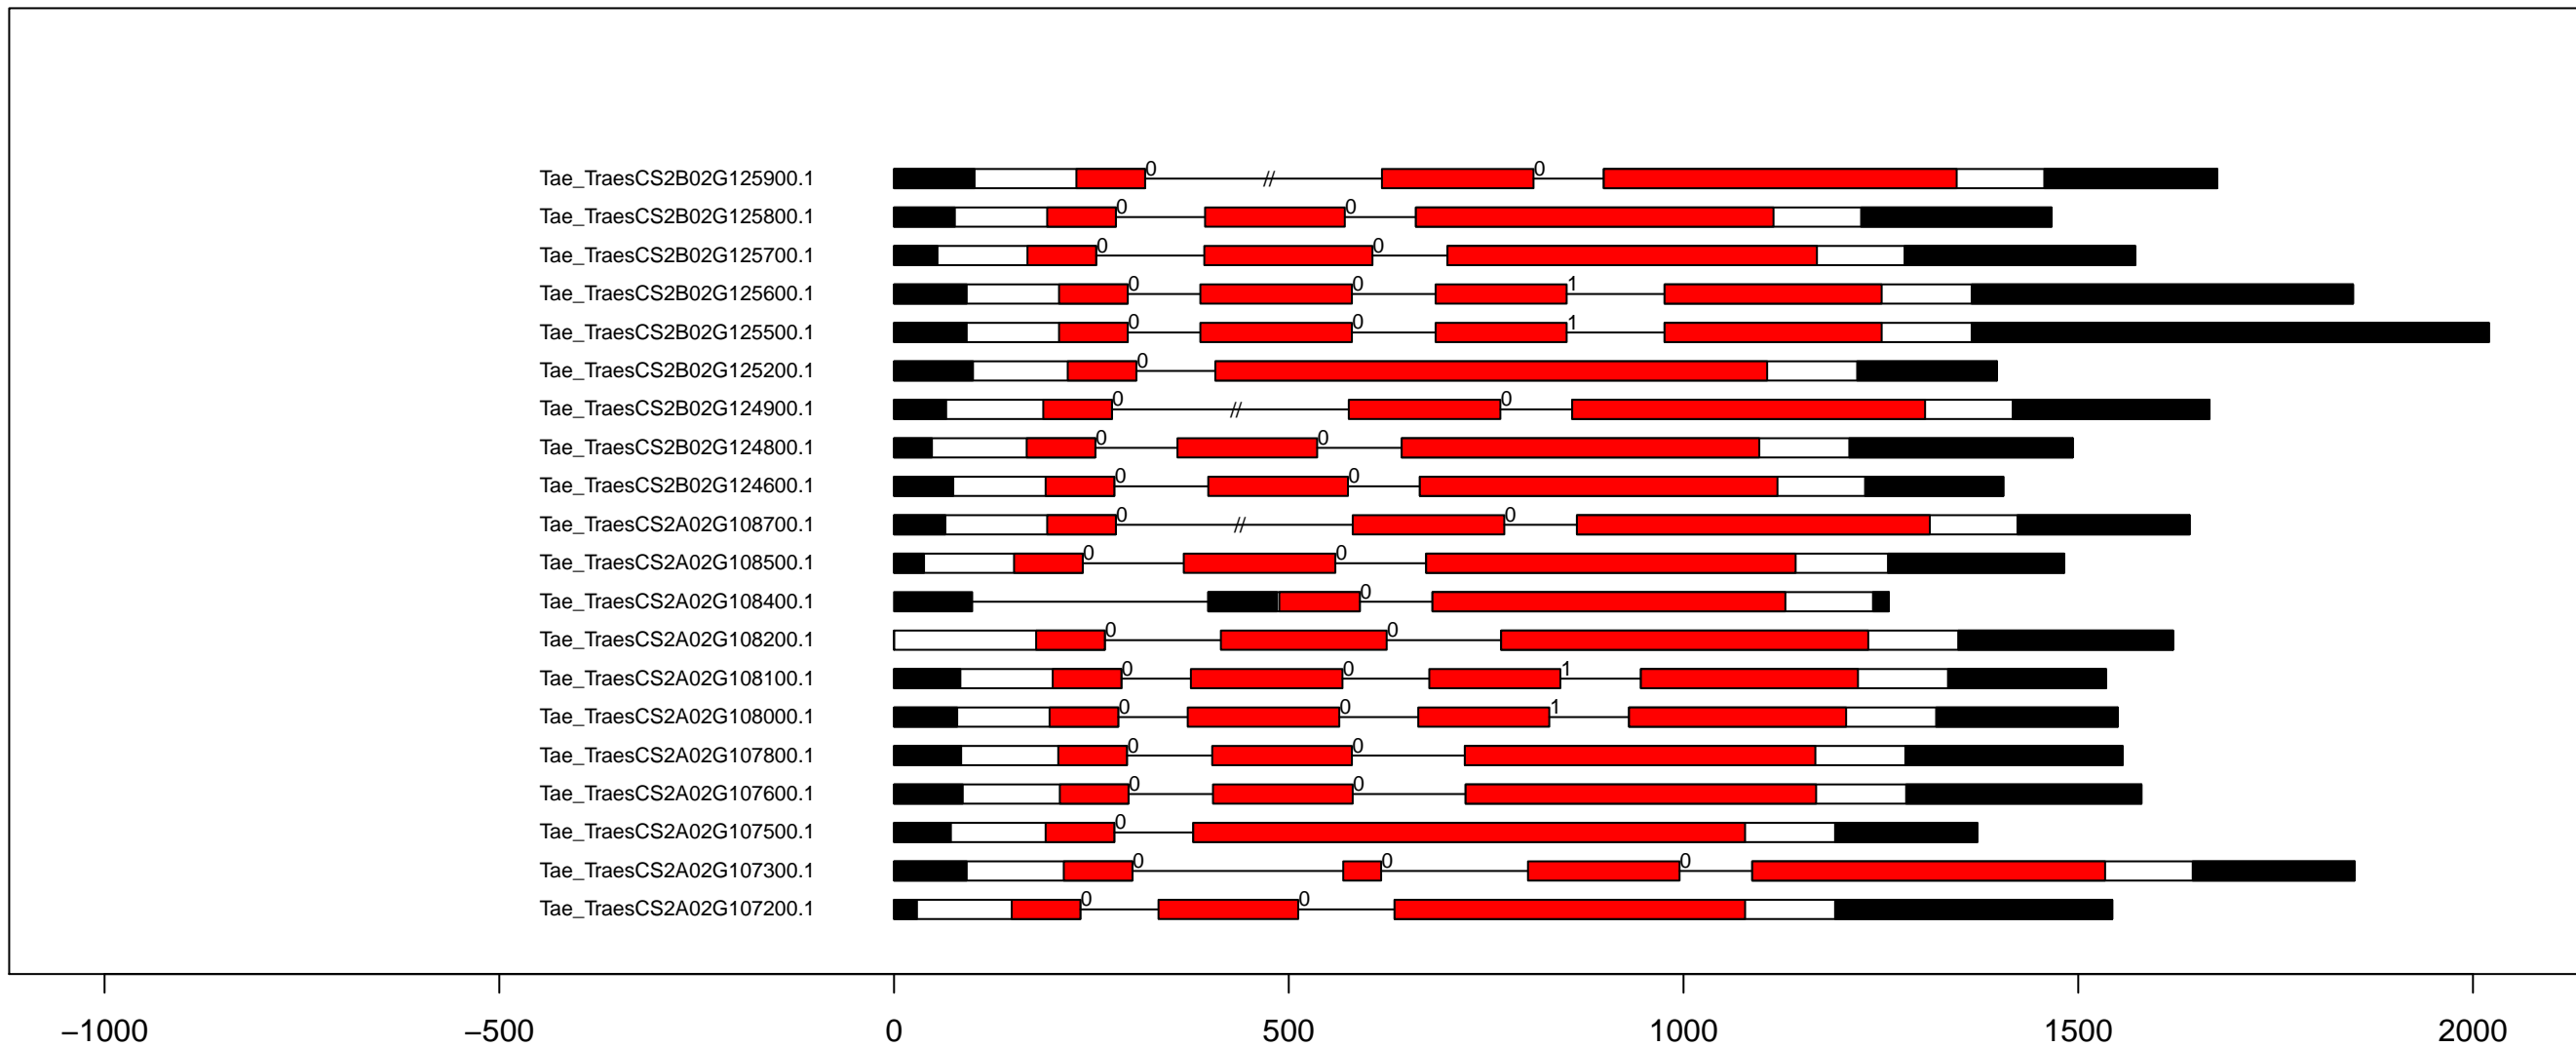

### T.ae class III peroxidase XVII subfamily exon-intron and prx domain diagram (part 2)

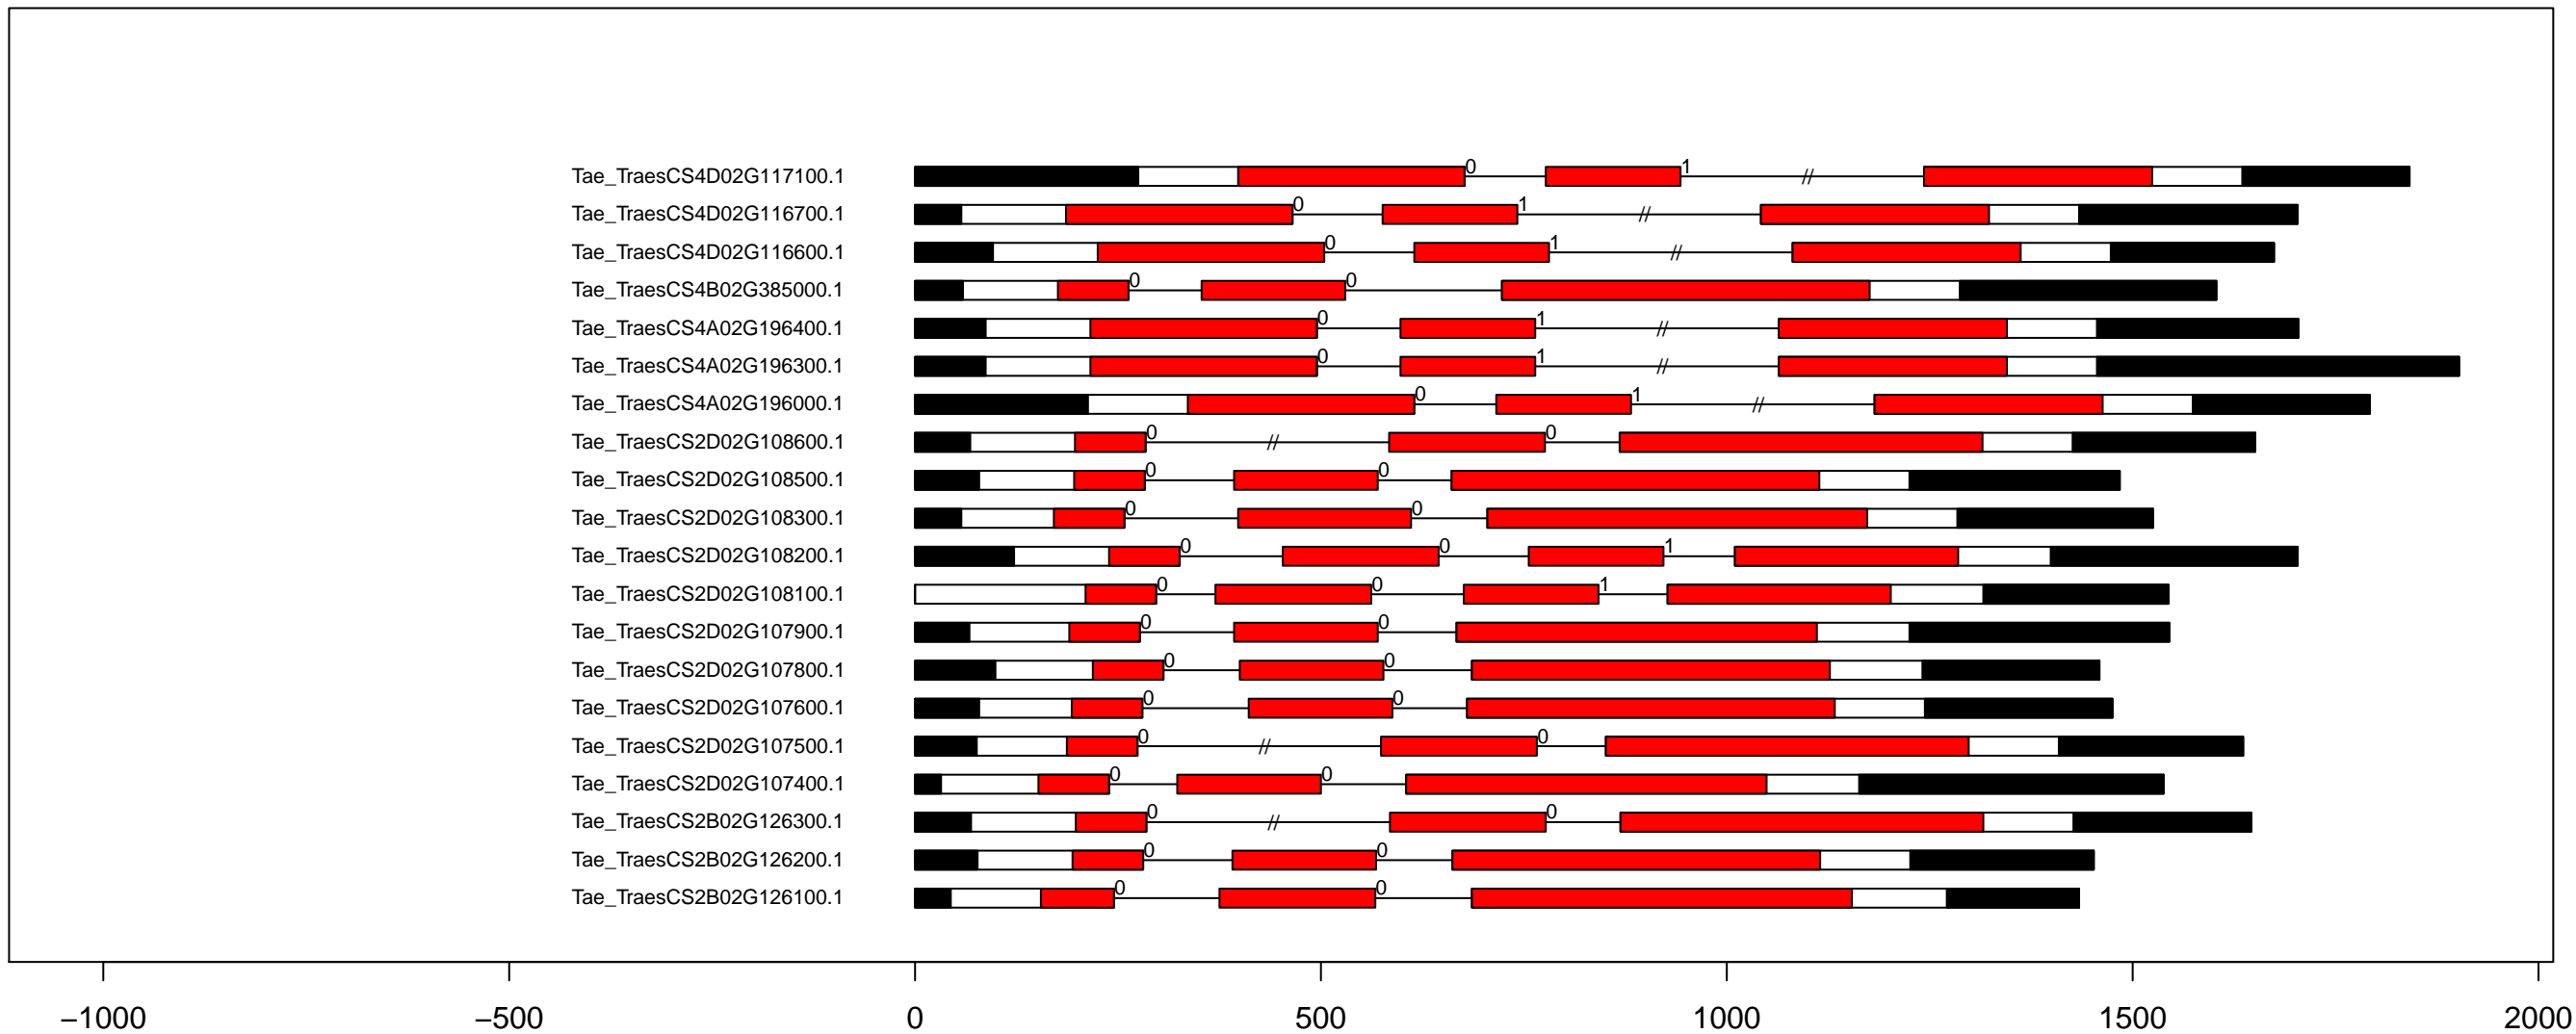



### T.ae class III peroxidase XVII subfamily exon-intron and prx domain diagram (part 3)

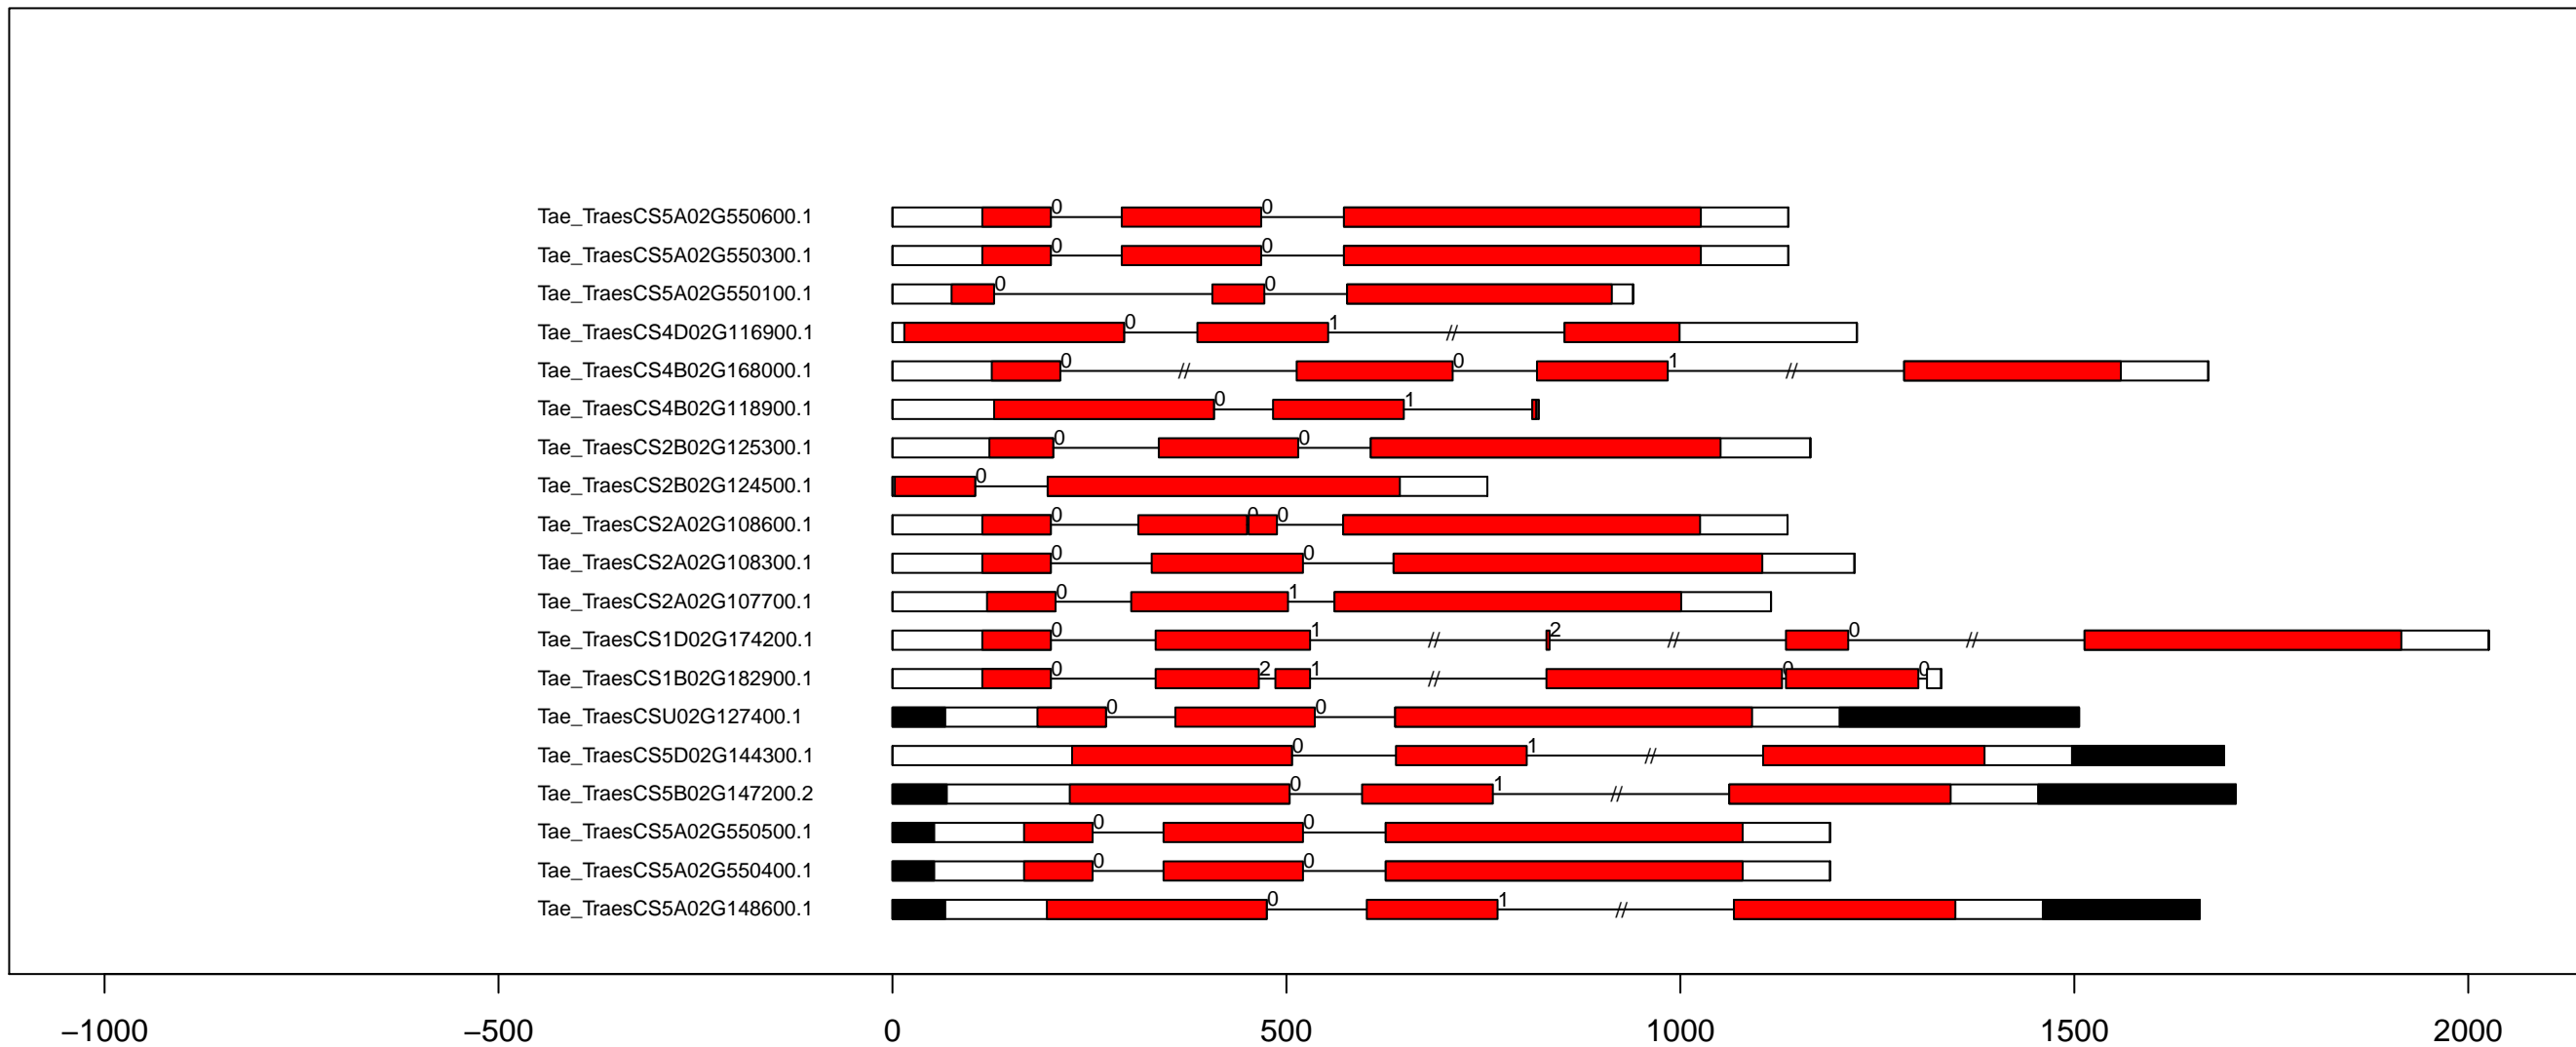

# T.ae class III peroxidase XVIII subfamily exon-intron and prx domain diagram (all)

Tae\_TraesCS7D02G212900.1

Tae\_TraesCS7B02G118200.1

Tae\_TraesCS7A02G211200.1

-1000

0

1000

2000

3000

4000

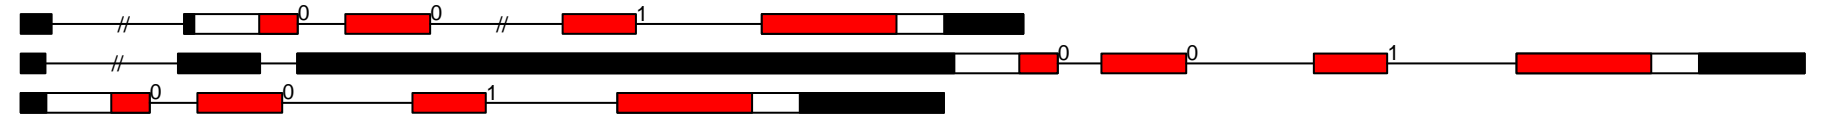

# T.ae class III peroxidase unclar\_classifications subfamily exon-intron and prx domain diagram (all)

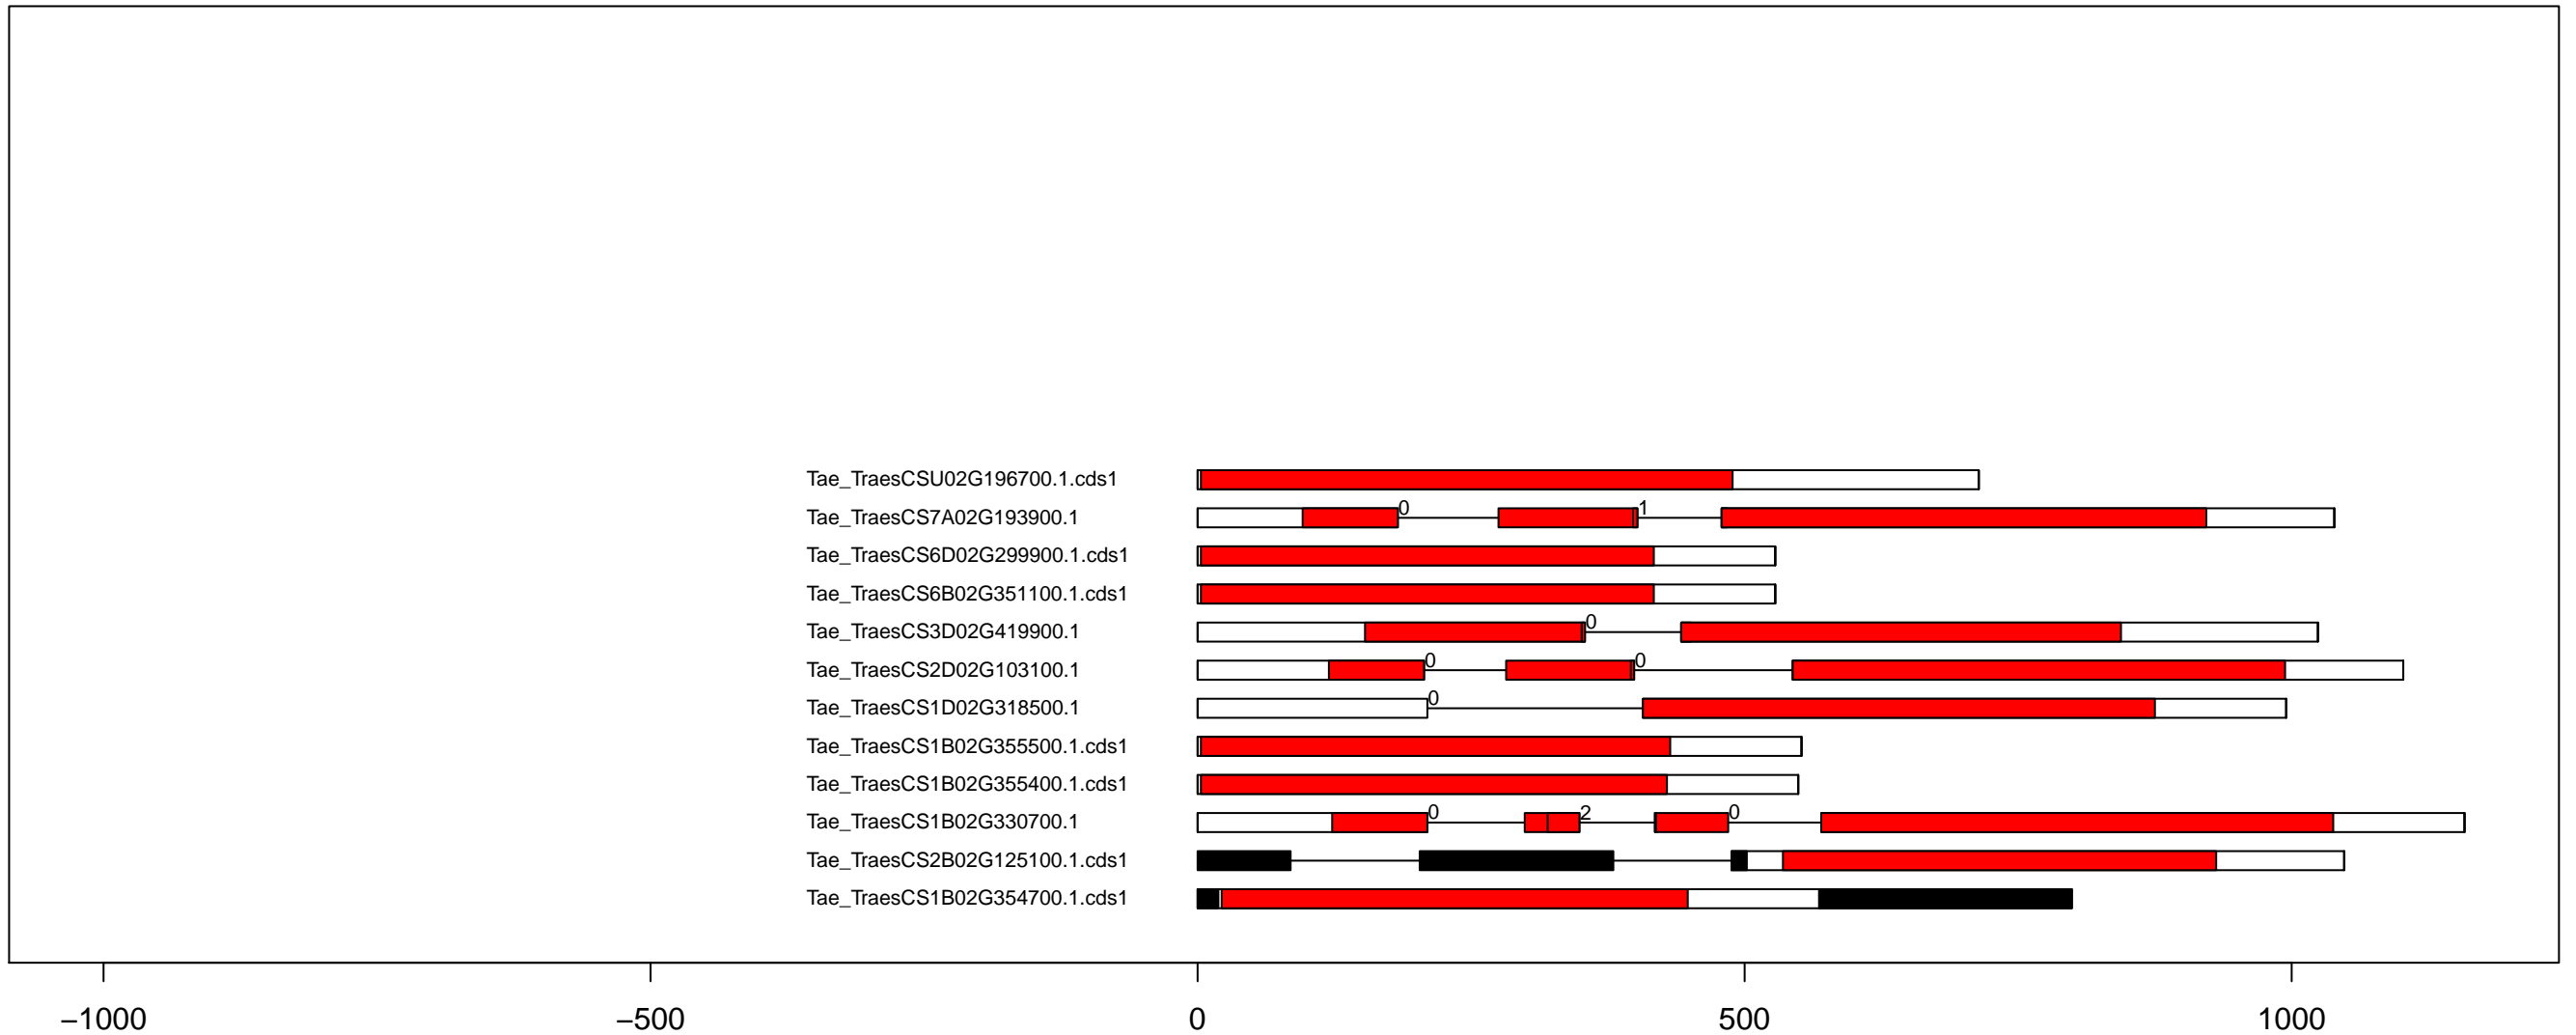

### T.di class III peroxidase I subfamily exon-intron and prx domain diagram (part 1)

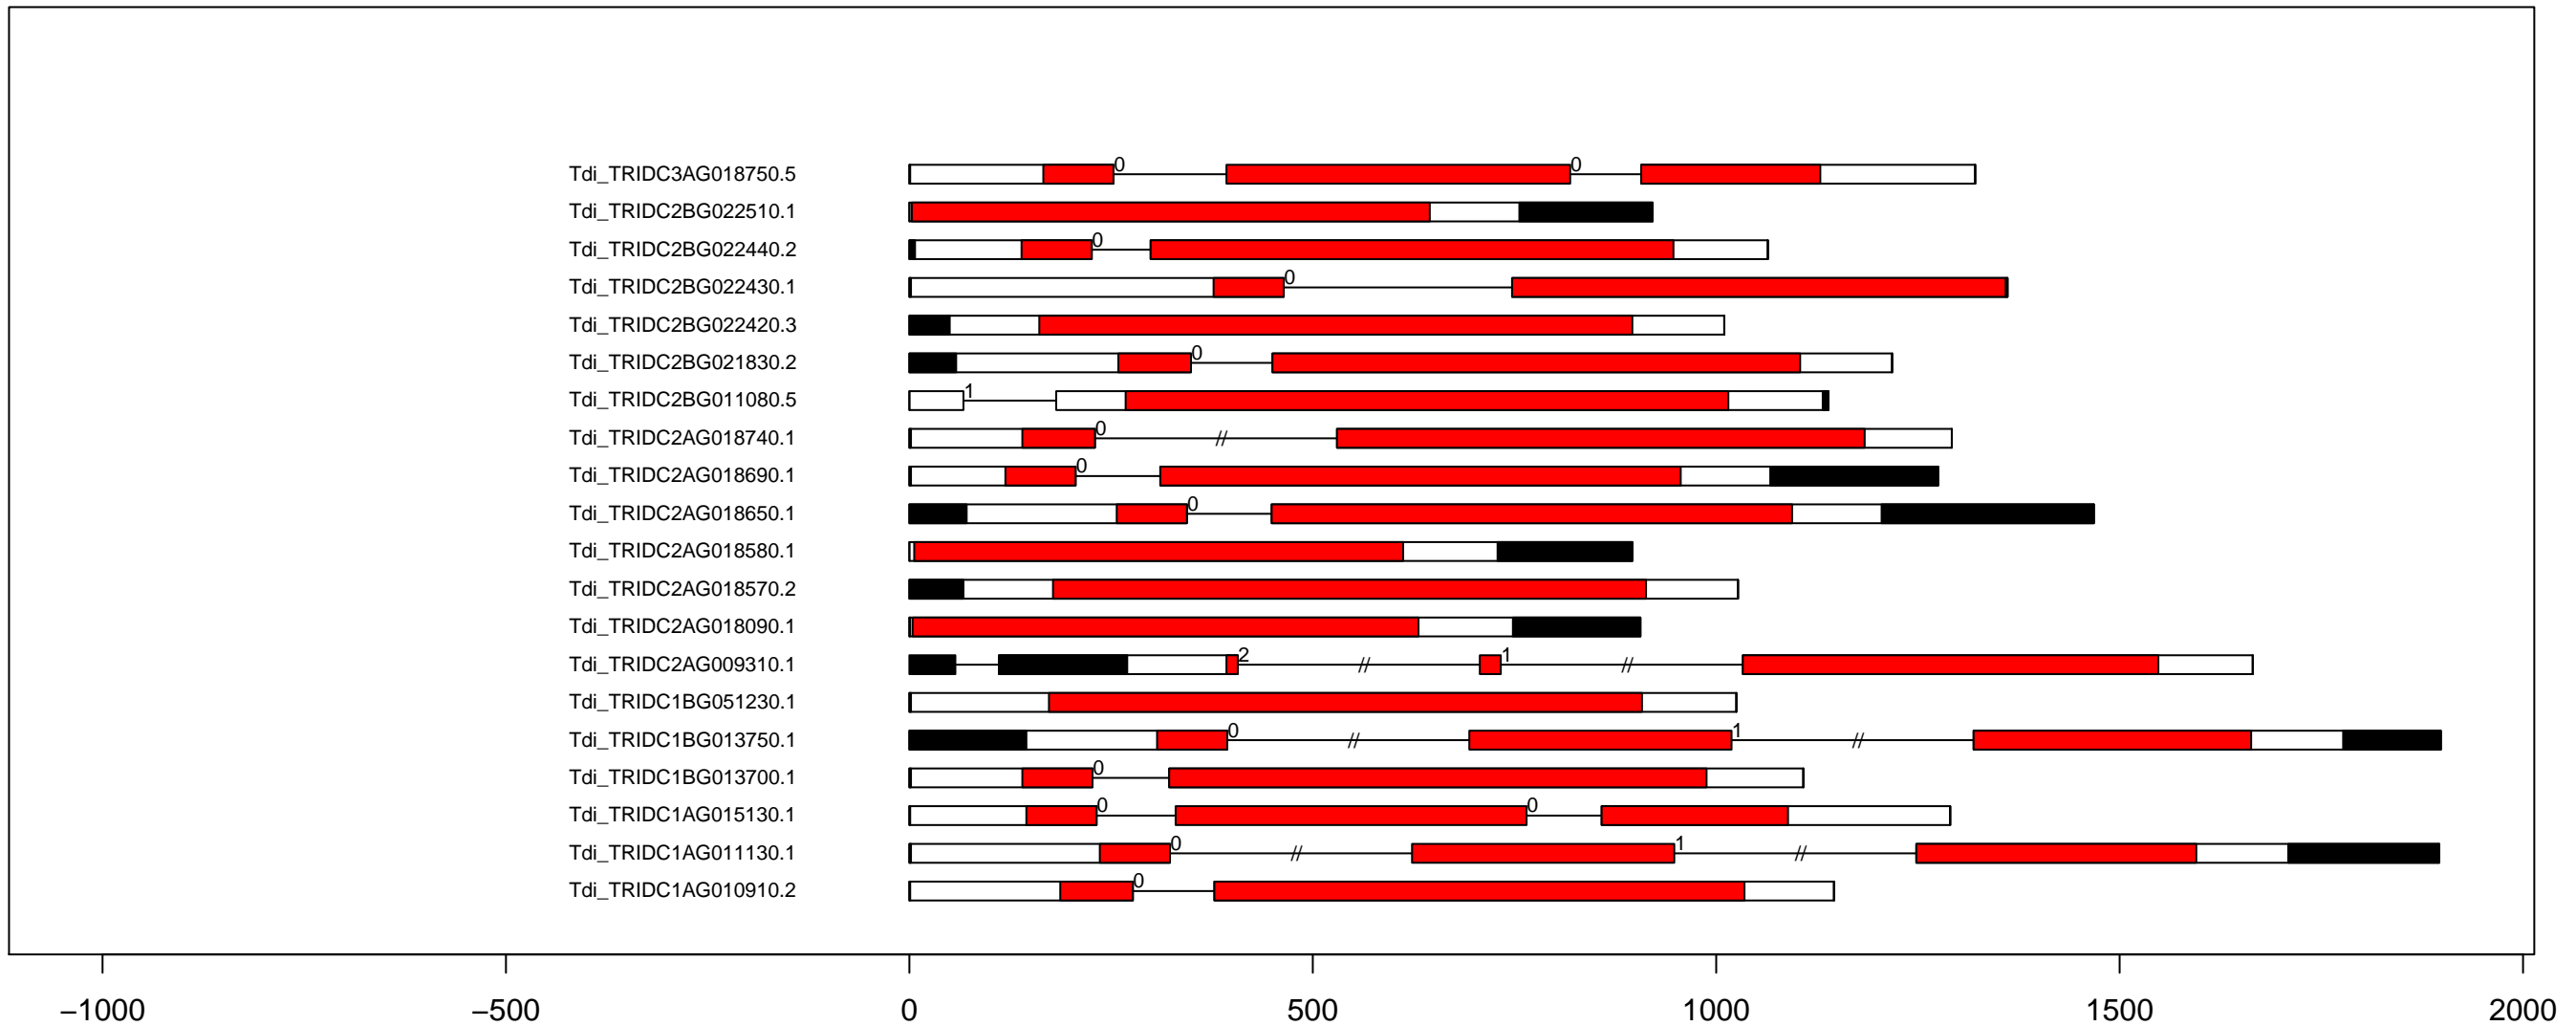

## T.di class III peroxidase I subfamily exon-intron and prx domain diagram (part 2)

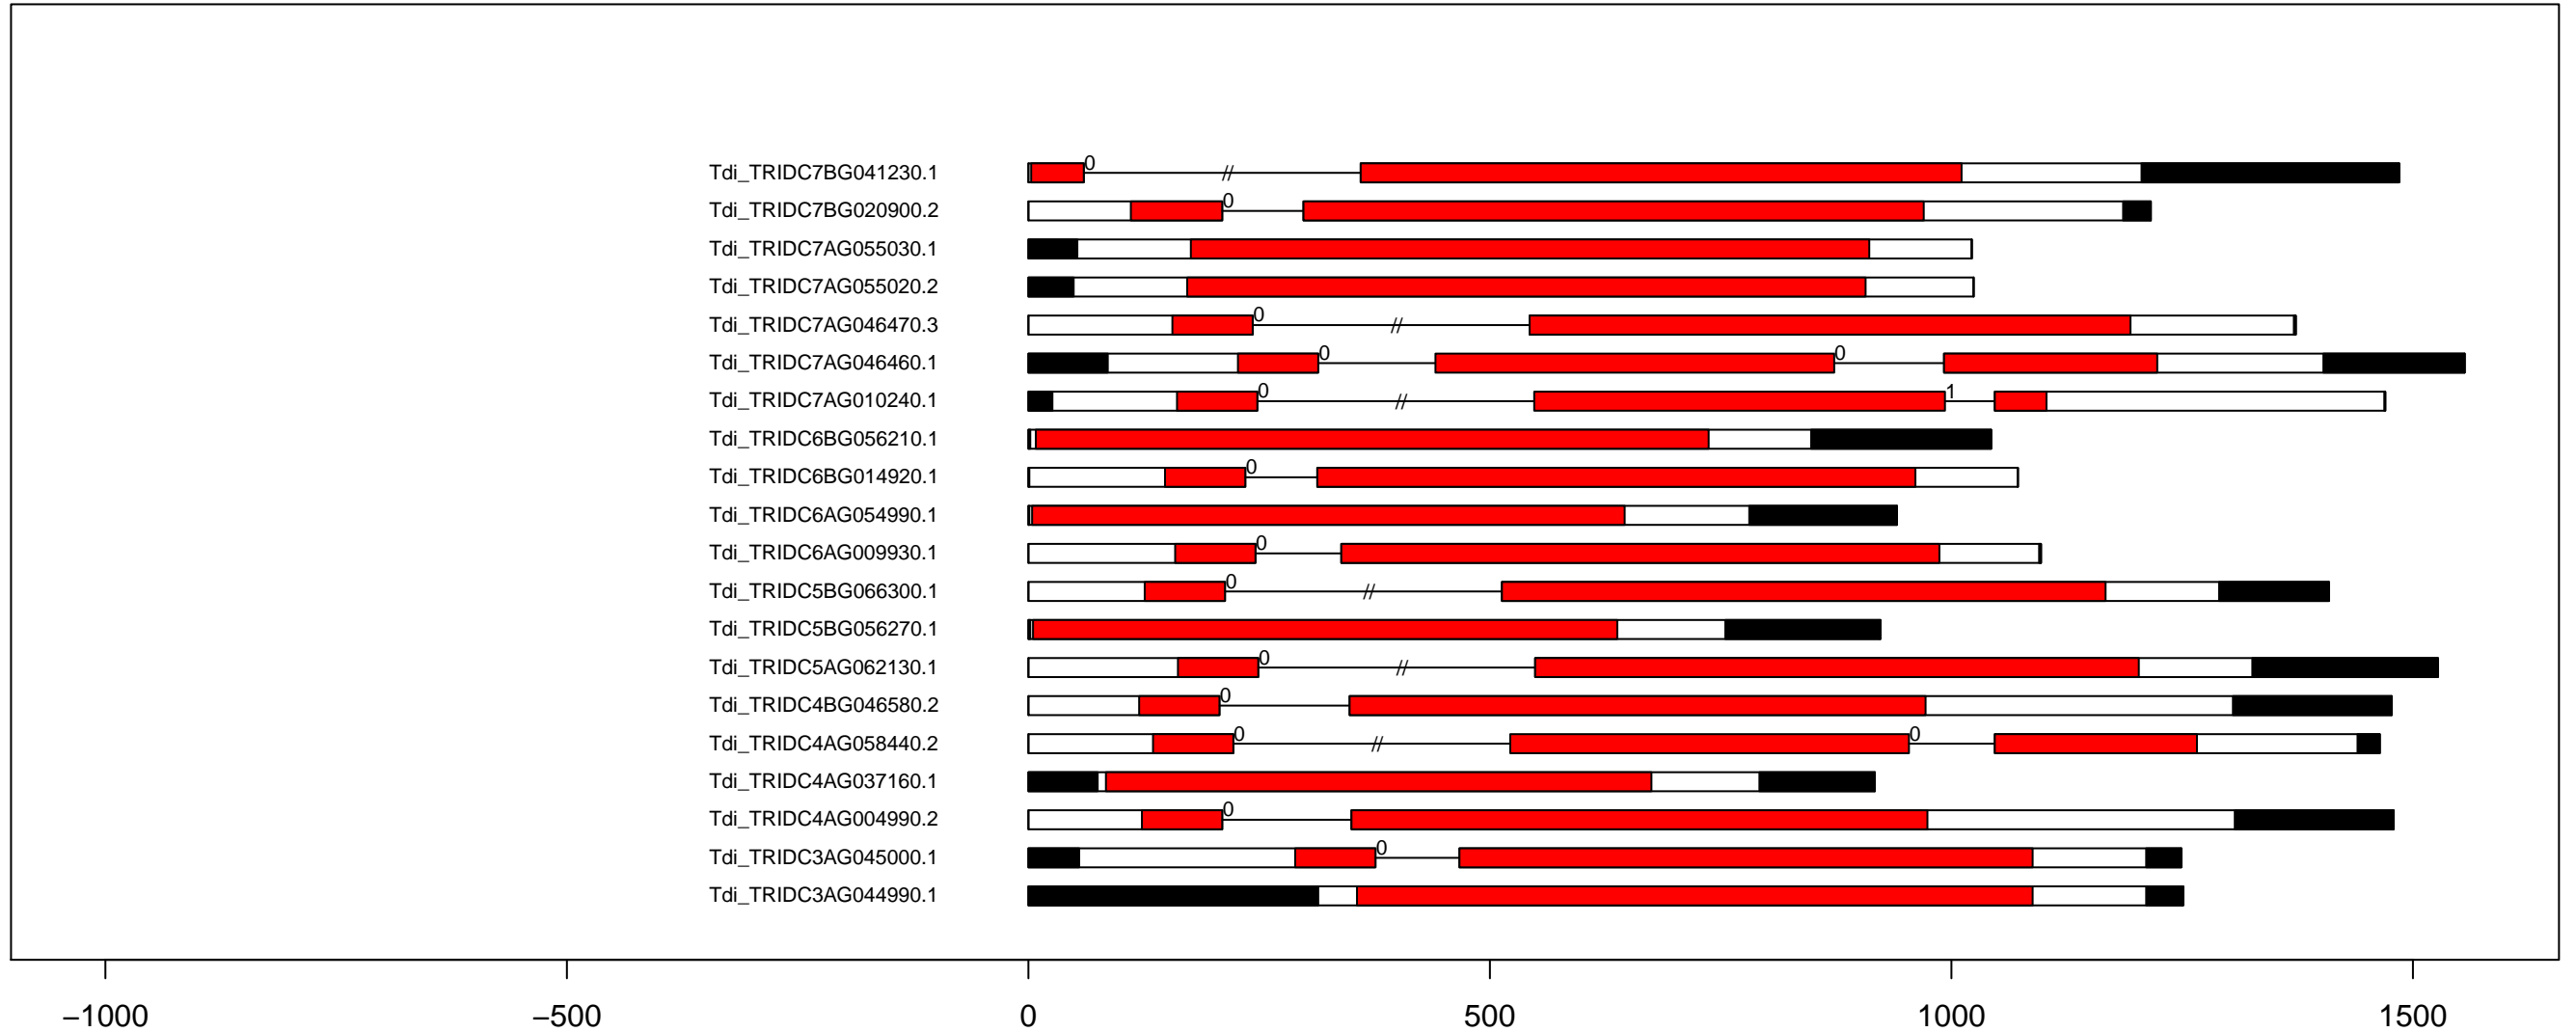



### T.di class III peroxidase I subfamily exon-intron and prx domain diagram (part 4)

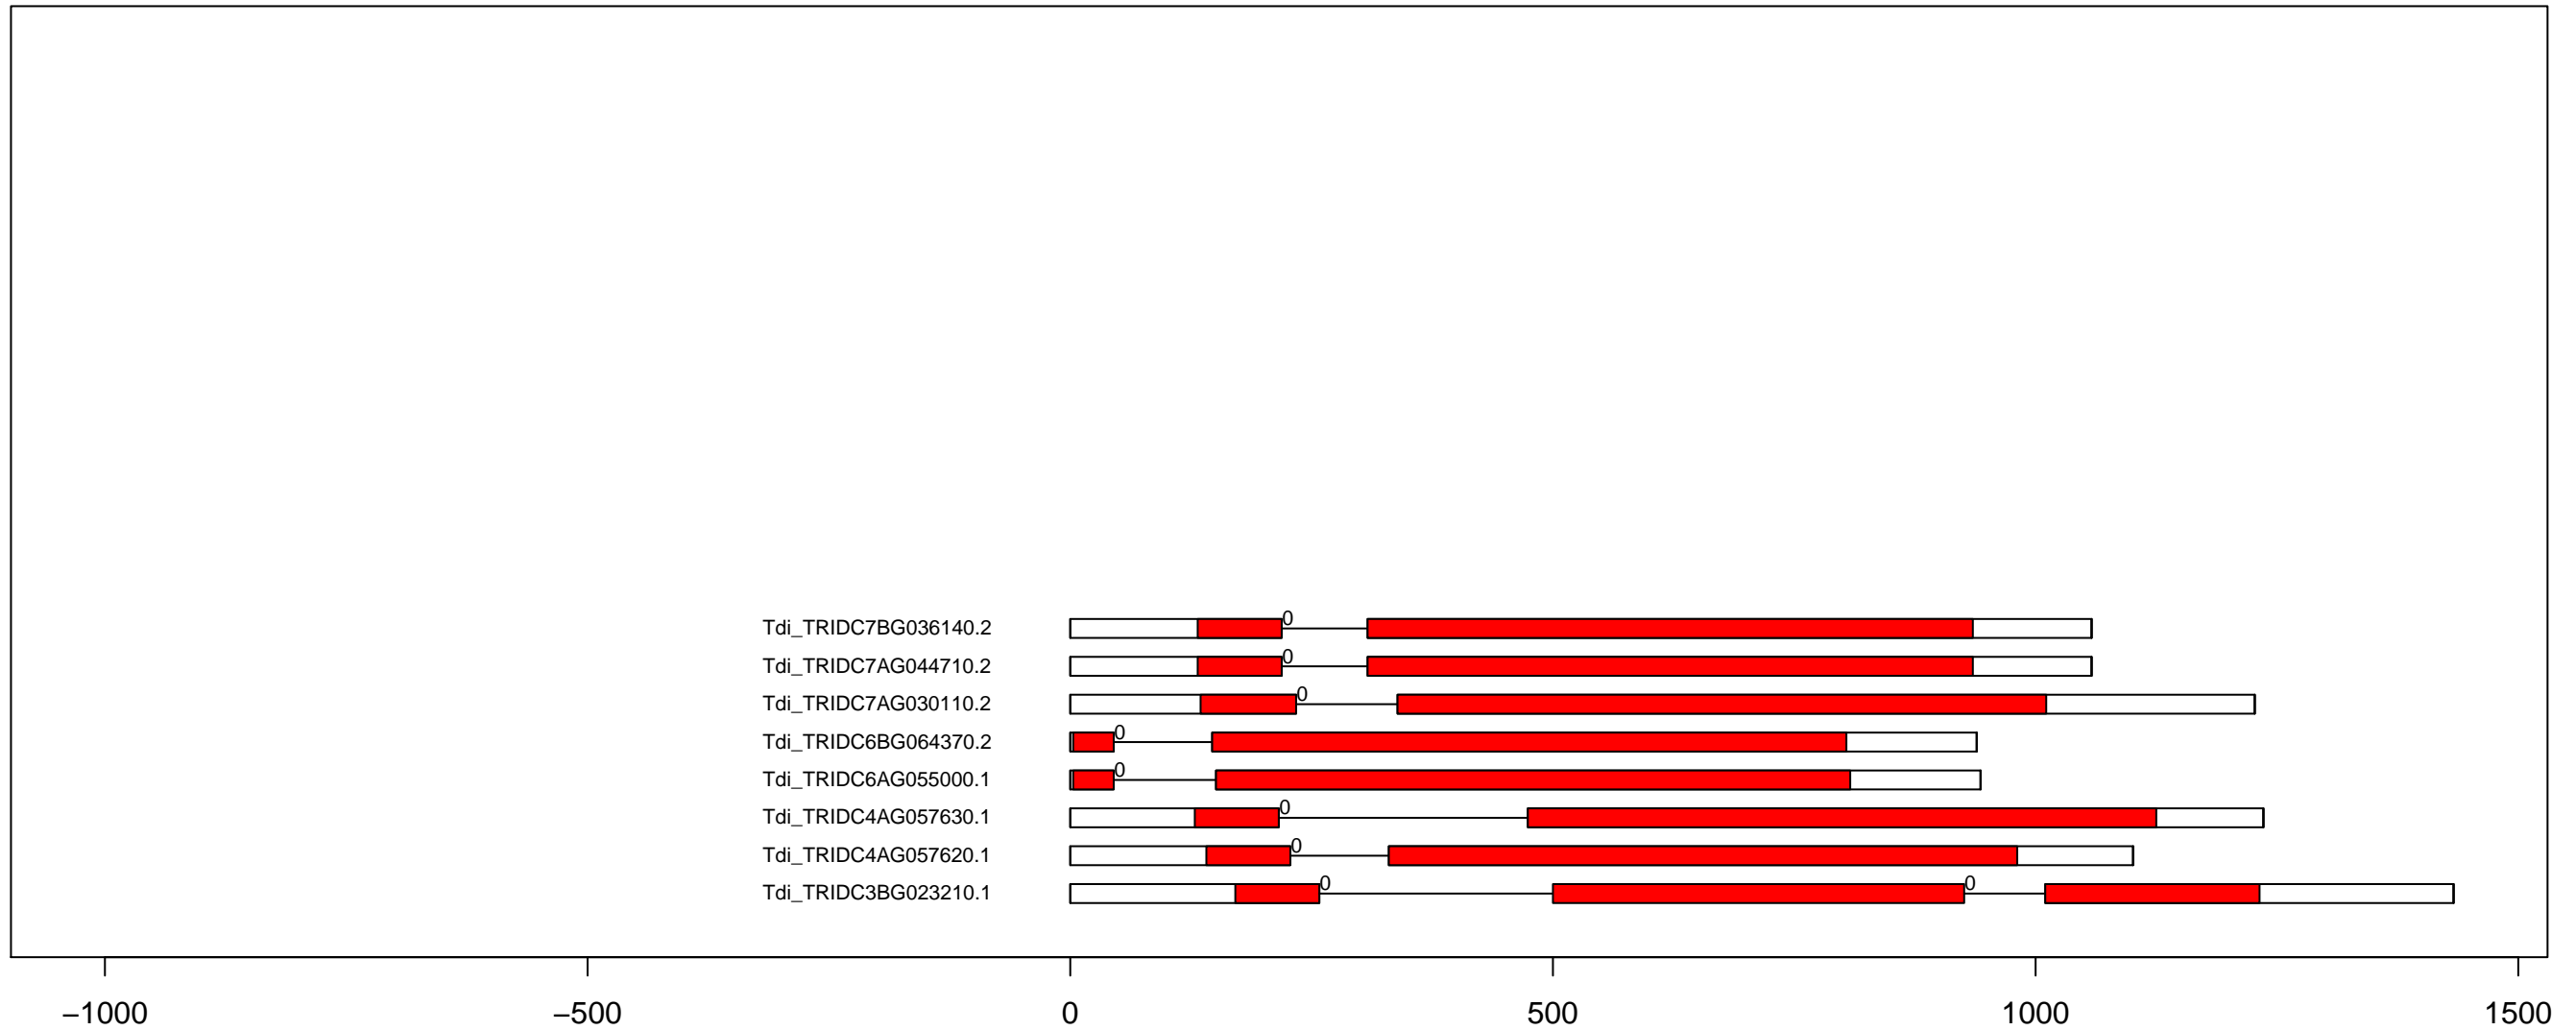

### T.di class III peroxidase II subfamily exon-intron and prx domain diagram (all)

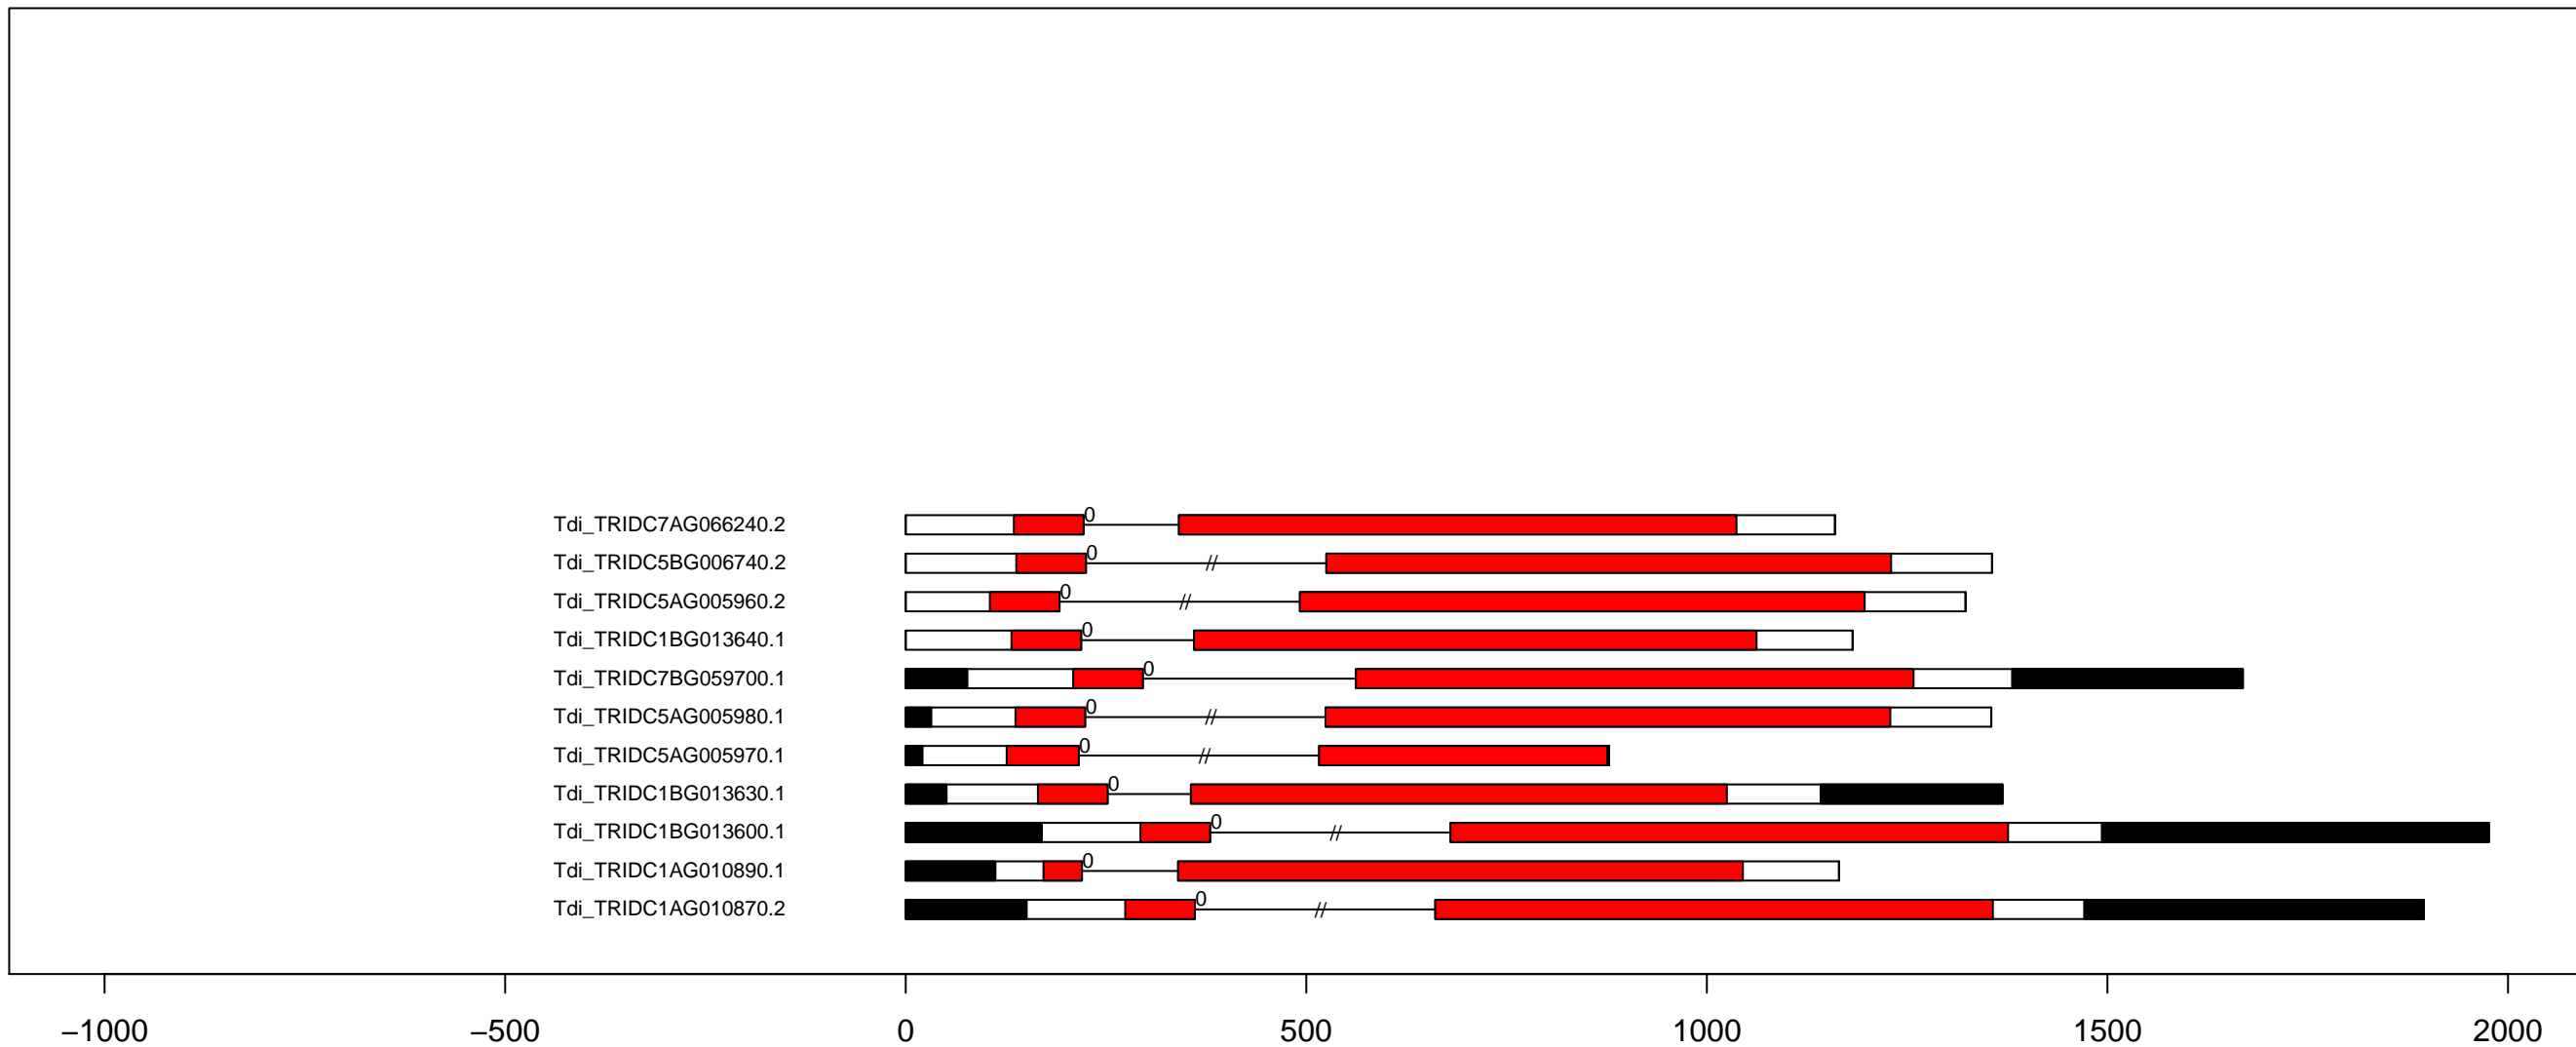



### T.di class III peroxidase III subfamily exon-intron and prx domain diagram (all)

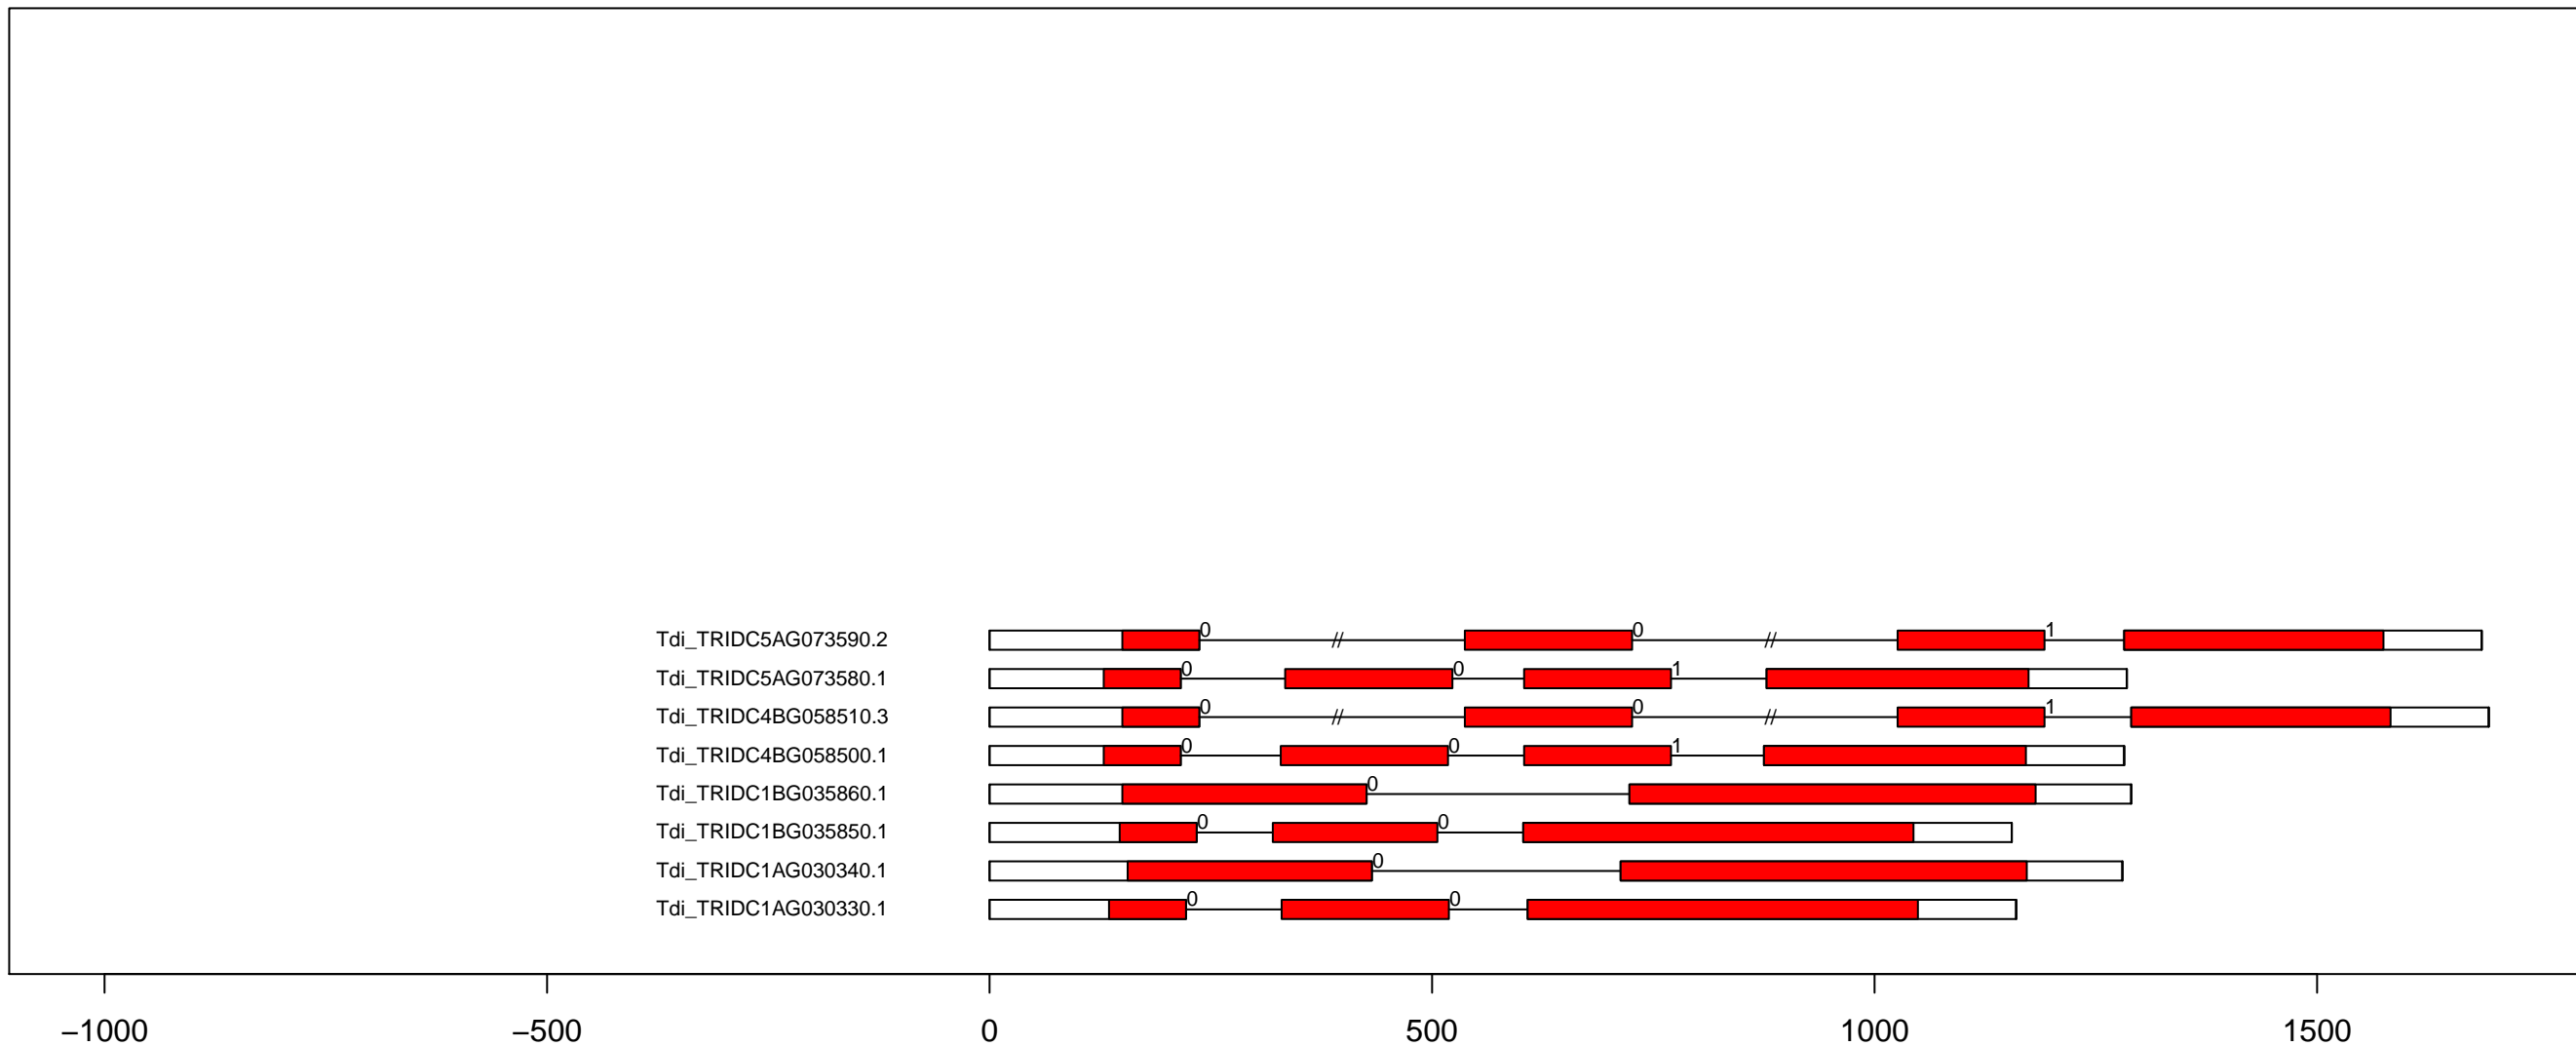

### T.di class III peroxidase V subfamily exon-intron and prx domain diagram (part 1)

Tdi\_TRIDC6BG056750.2  
 Tdi\_TRIDC6BG024290.1  
 Tdi\_TRIDC6AG048650.1  
 Tdi\_TRIDC5BG017110.1  
 Tdi\_TRIDC5AG014680.1  
 Tdi\_TRIDC4BG057150.1  
 Tdi\_TRIDC4BG031050.1  
 Tdi\_TRIDC4AG018890.1  
 Tdi\_TRIDC3BG053020.2  
 Tdi\_TRIDC3BG041710.2  
 Tdi\_TRIDC3AG046660.2  
 Tdi\_TRIDC2BG041350.1  
 Tdi\_TRIDC2BG041340.1  
 Tdi\_TRIDC2BG034260.2  
 Tdi\_TRIDC2AG066170.2  
 Tdi\_TRIDC1BG059140.1  
 Tdi\_TRIDC1BG053690.3  
 Tdi\_TRIDC1BG053610.1  
 Tdi\_TRIDC1AG052400.1  
 Tdi\_TRIDC1AG047500.2

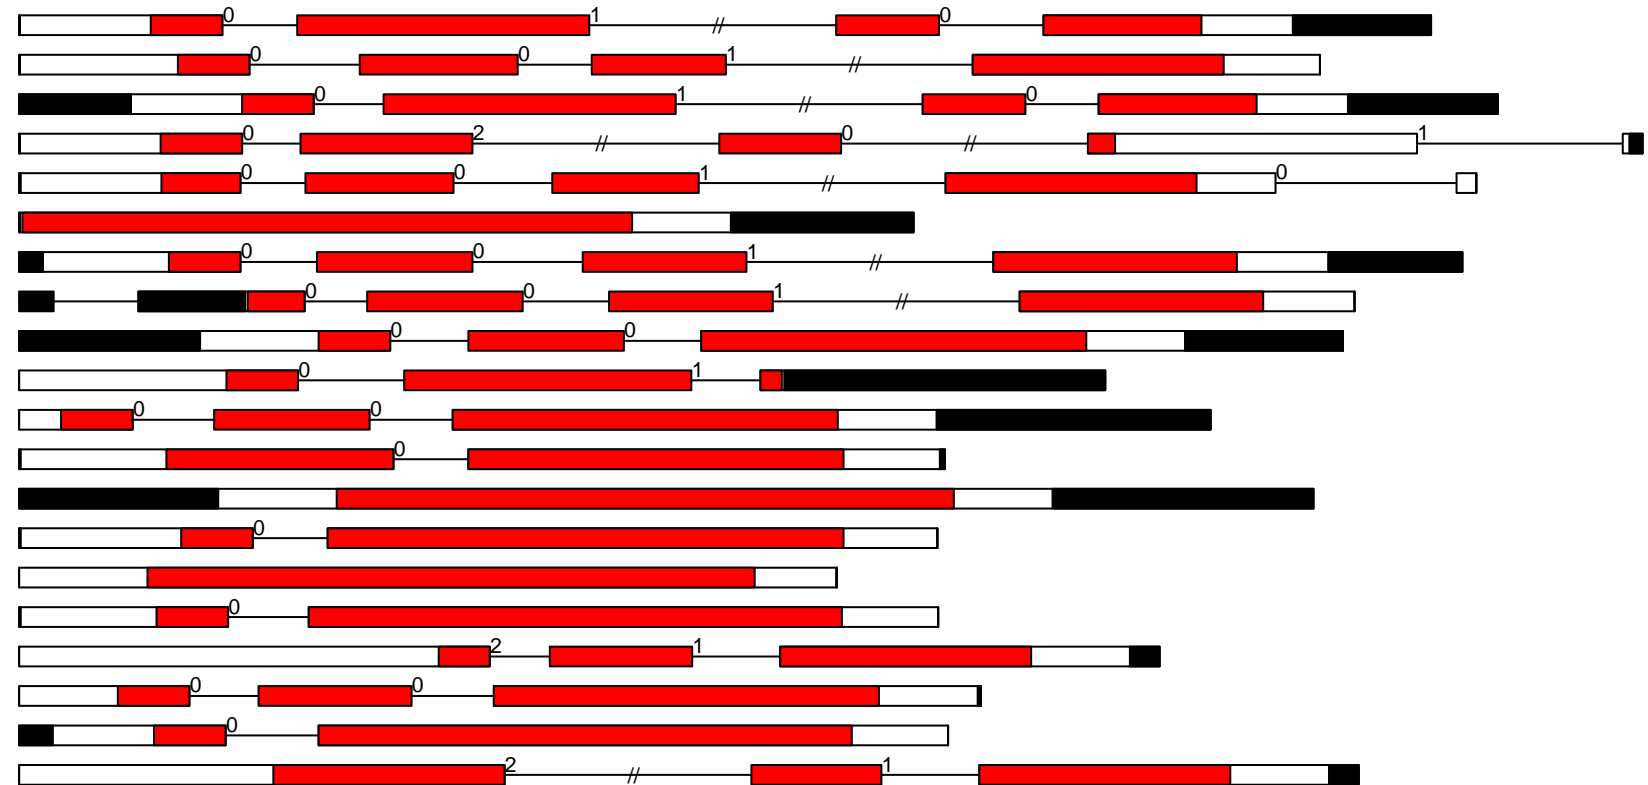

-1000

-500

0

500

1000

1500

2000

### T.di class III peroxidase V subfamily exon-intron and prx domain diagram (part 2)

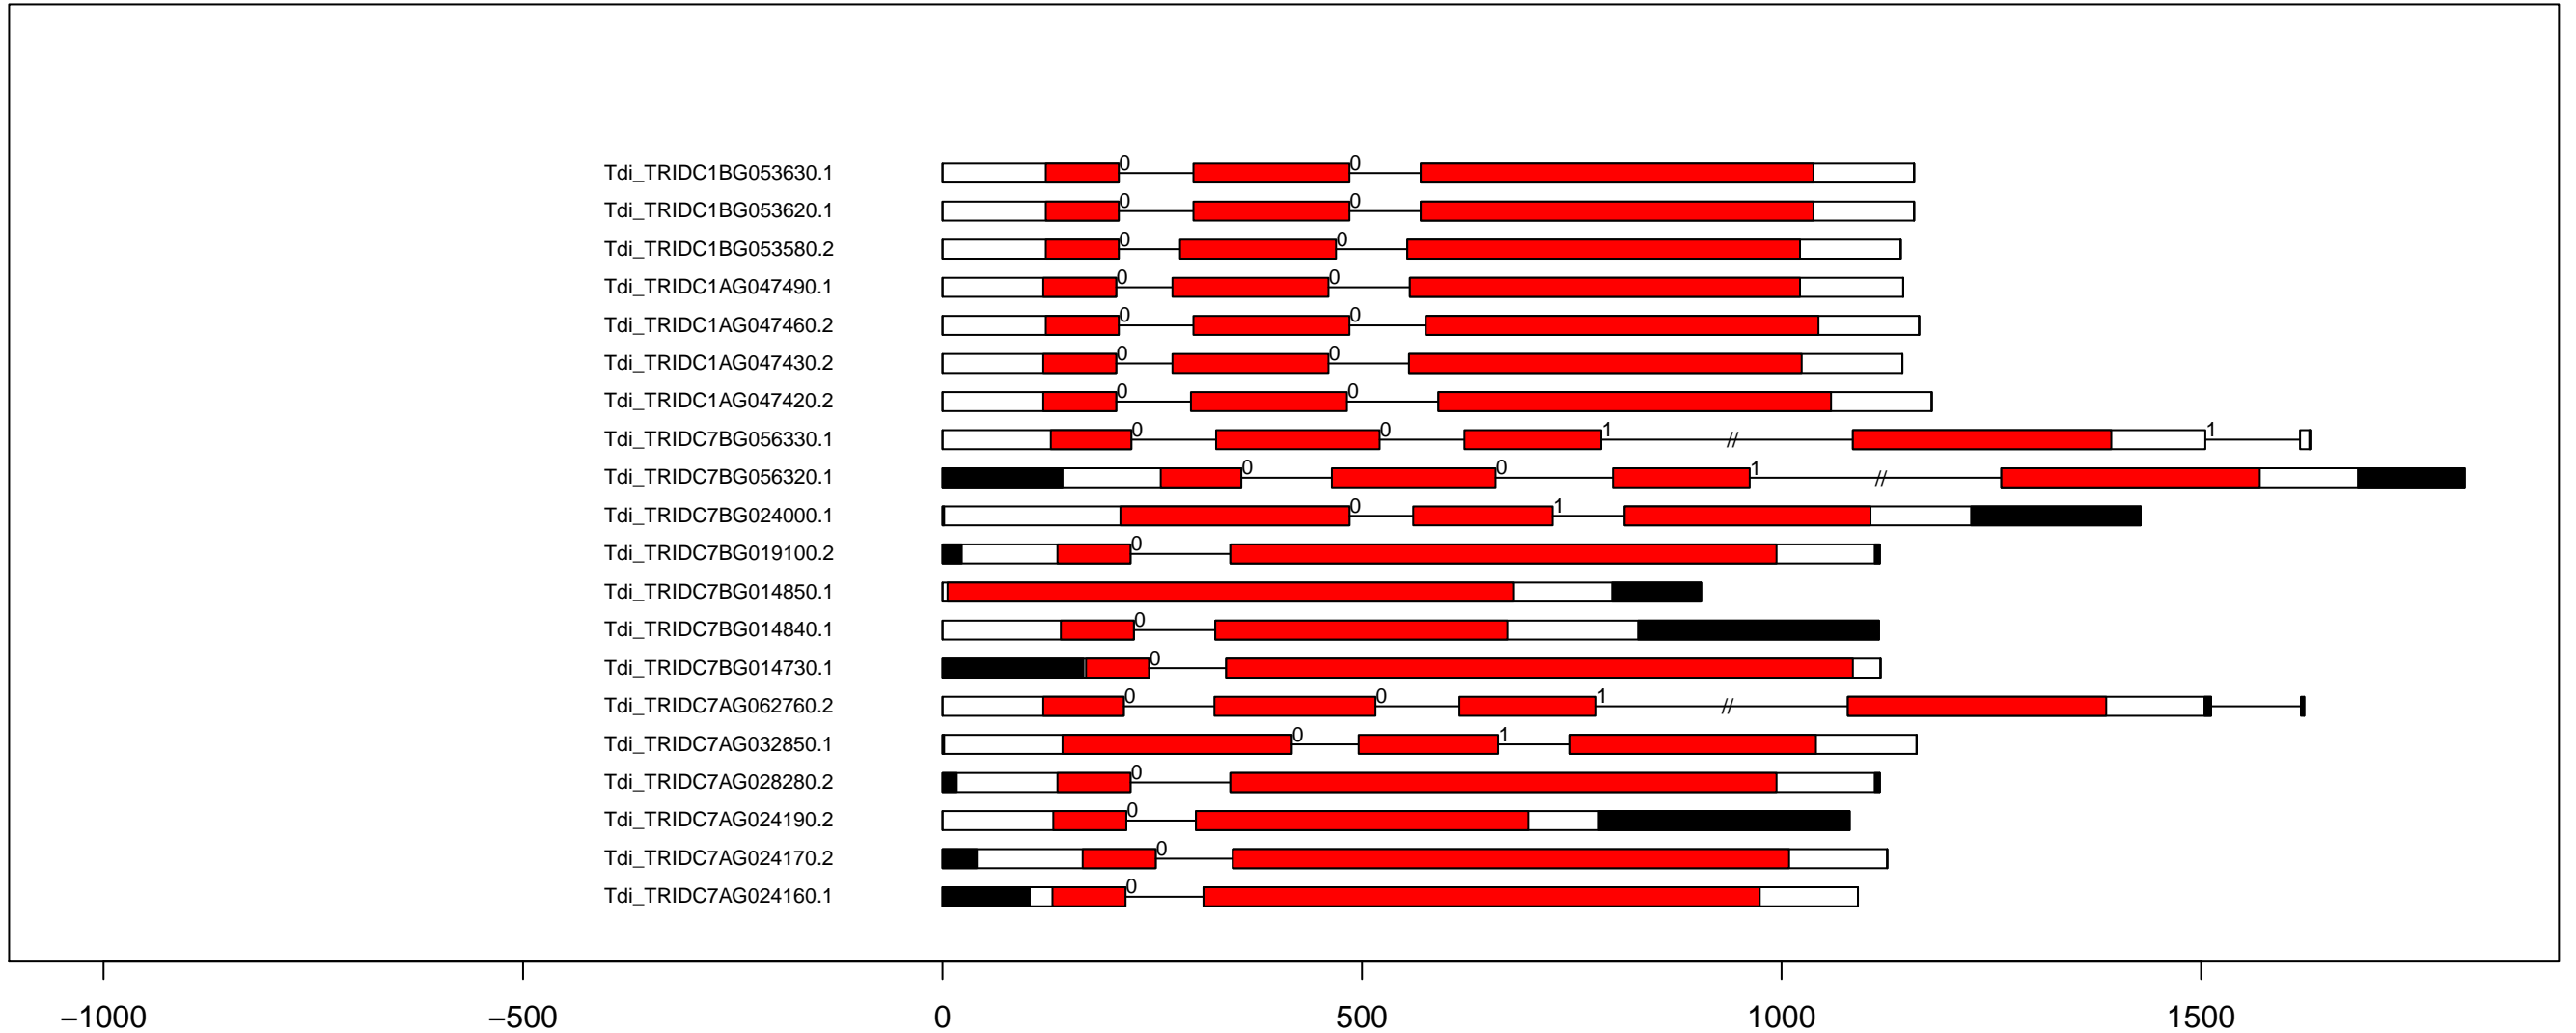

### T.di class III peroxidase V subfamily exon-intron and prx domain diagram (part 3)

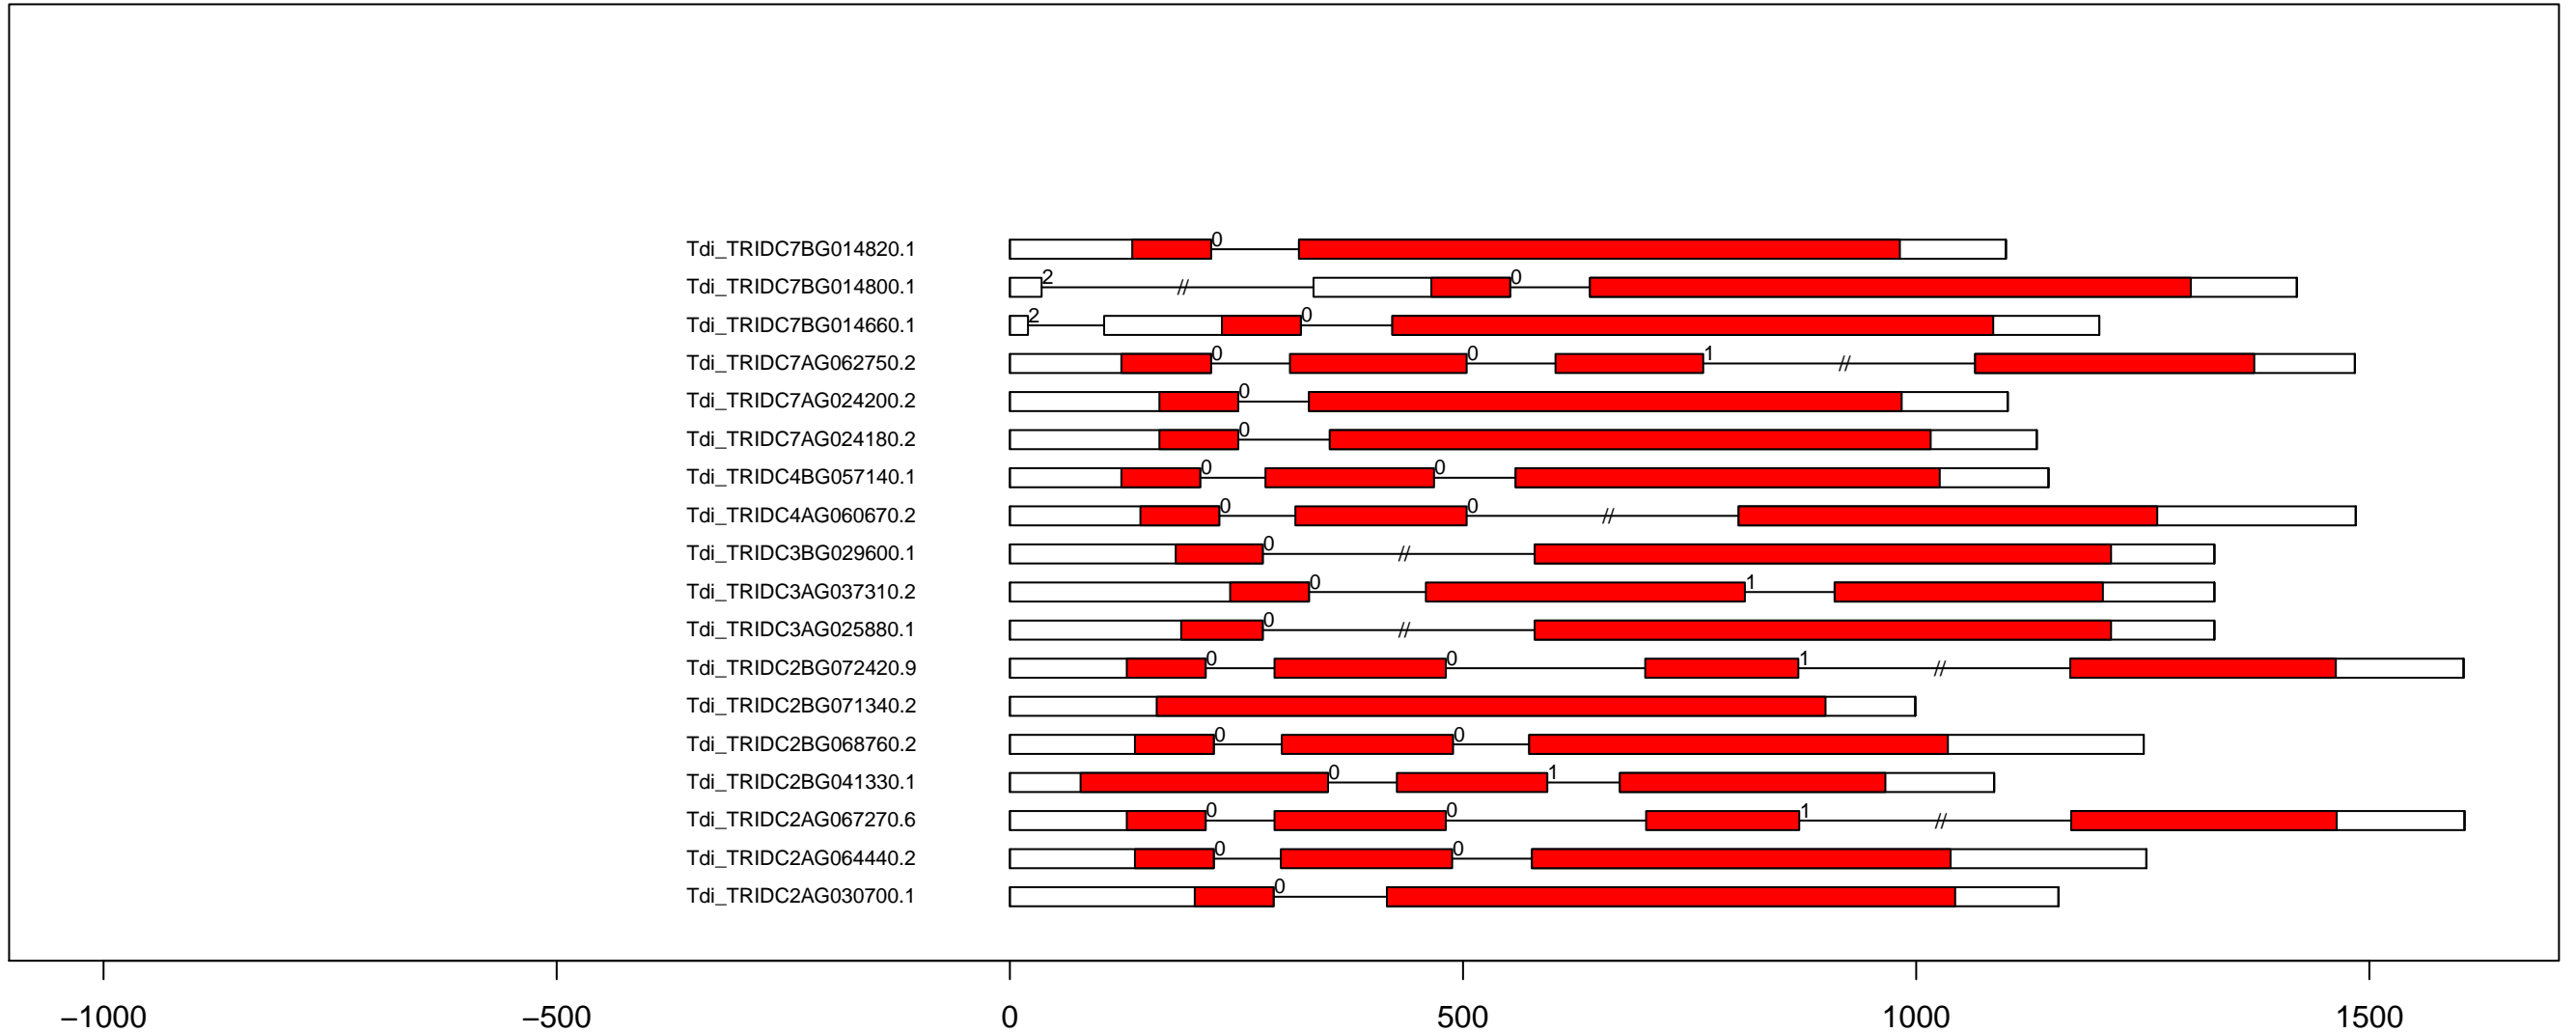

### T.di class III peroxidase VI subfamily exon-intron and prx domain diagram (part 1)

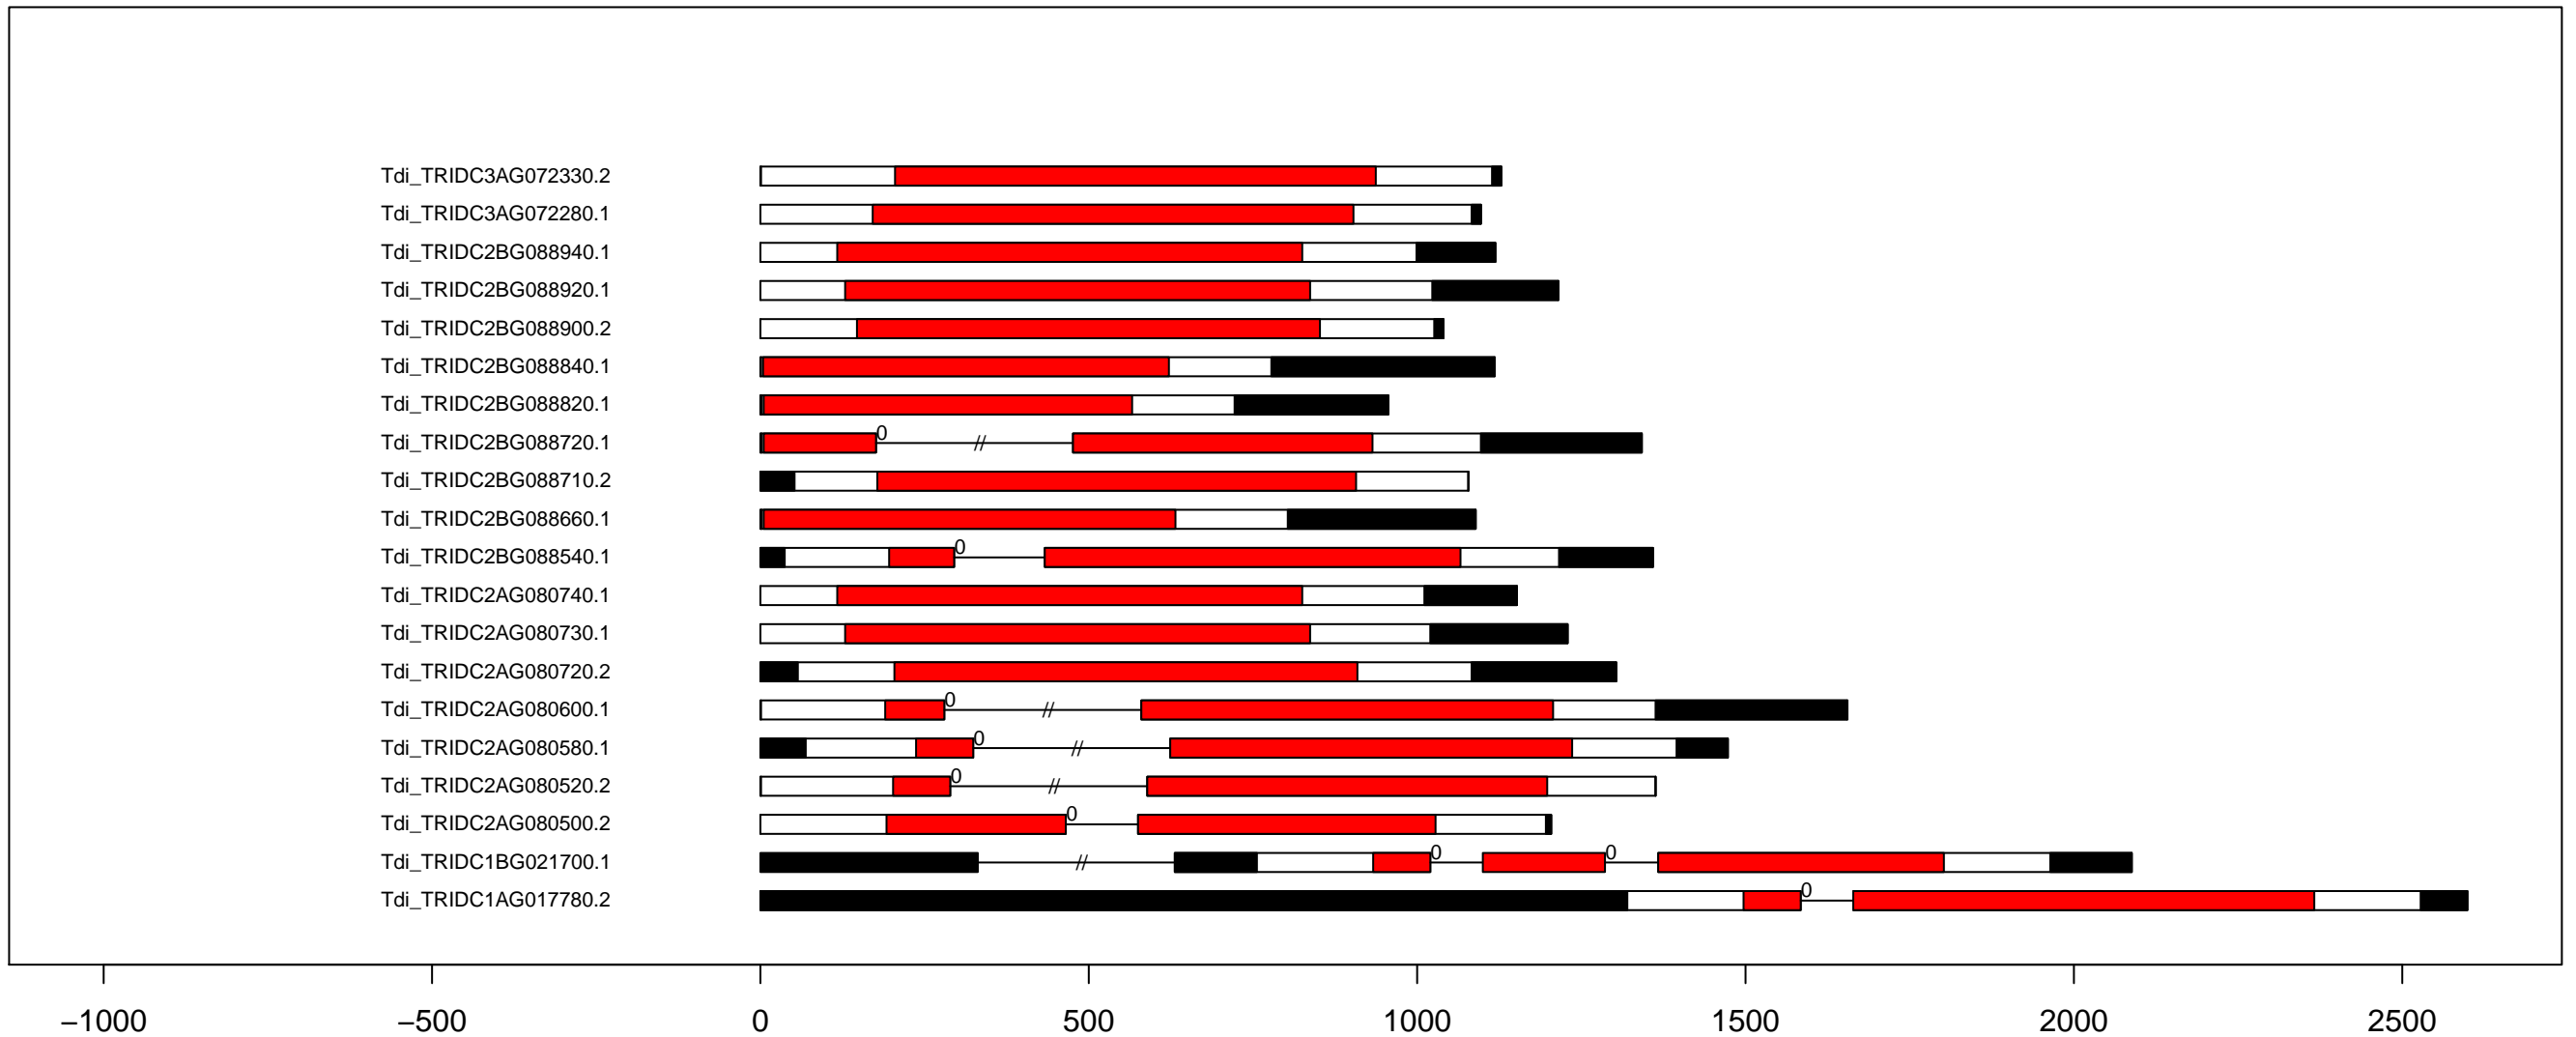

## T.di class III peroxidase VI subfamily exon-intron and prx domain diagram (part 2)

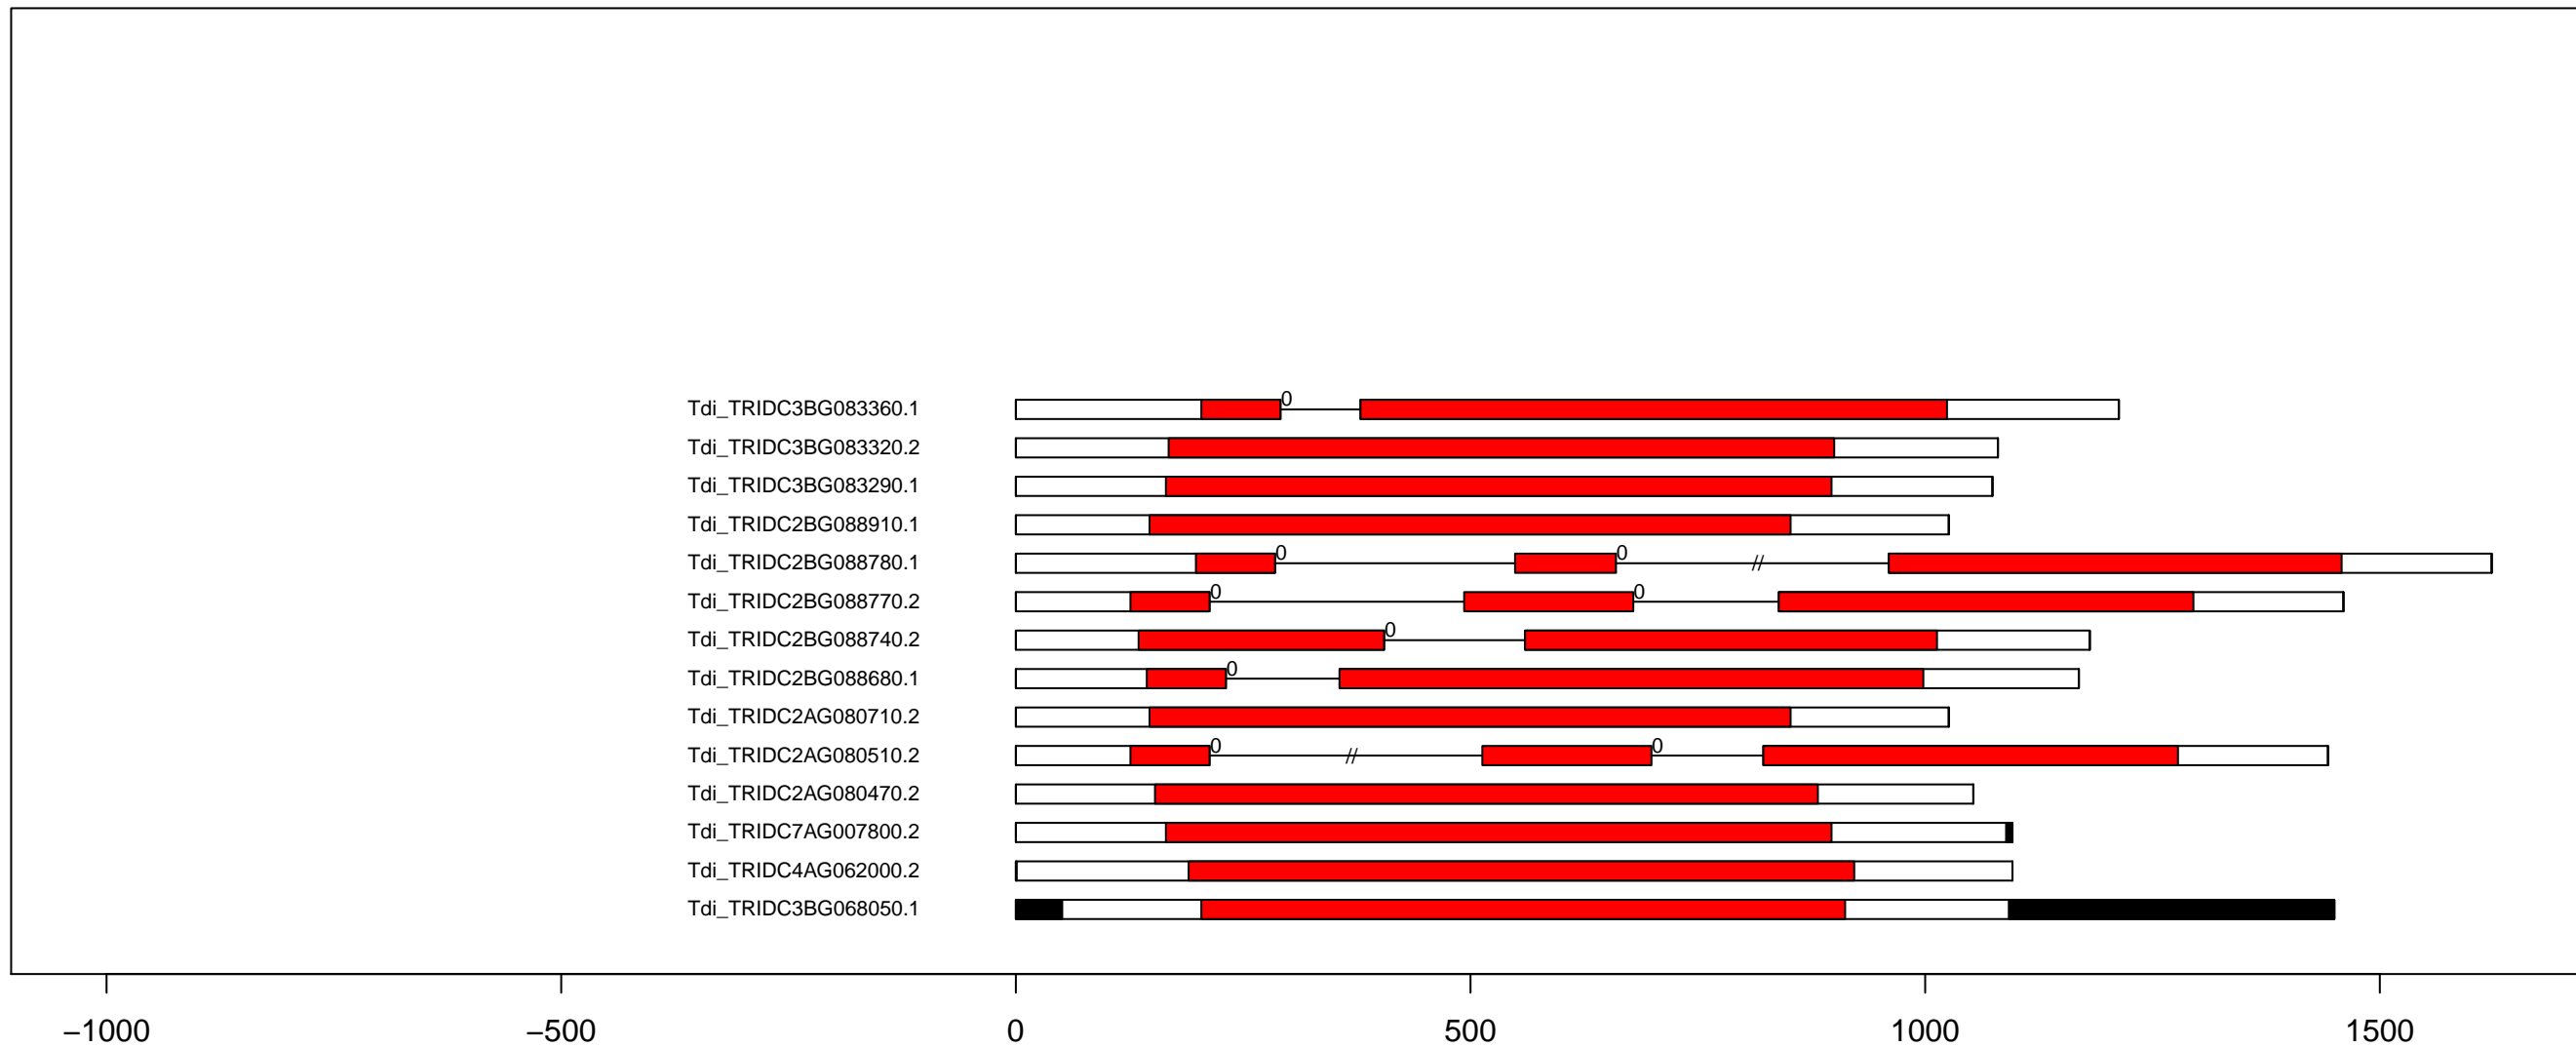

### T.di class III peroxidase VII subfamily exon-intron and prx domain diagram (all)

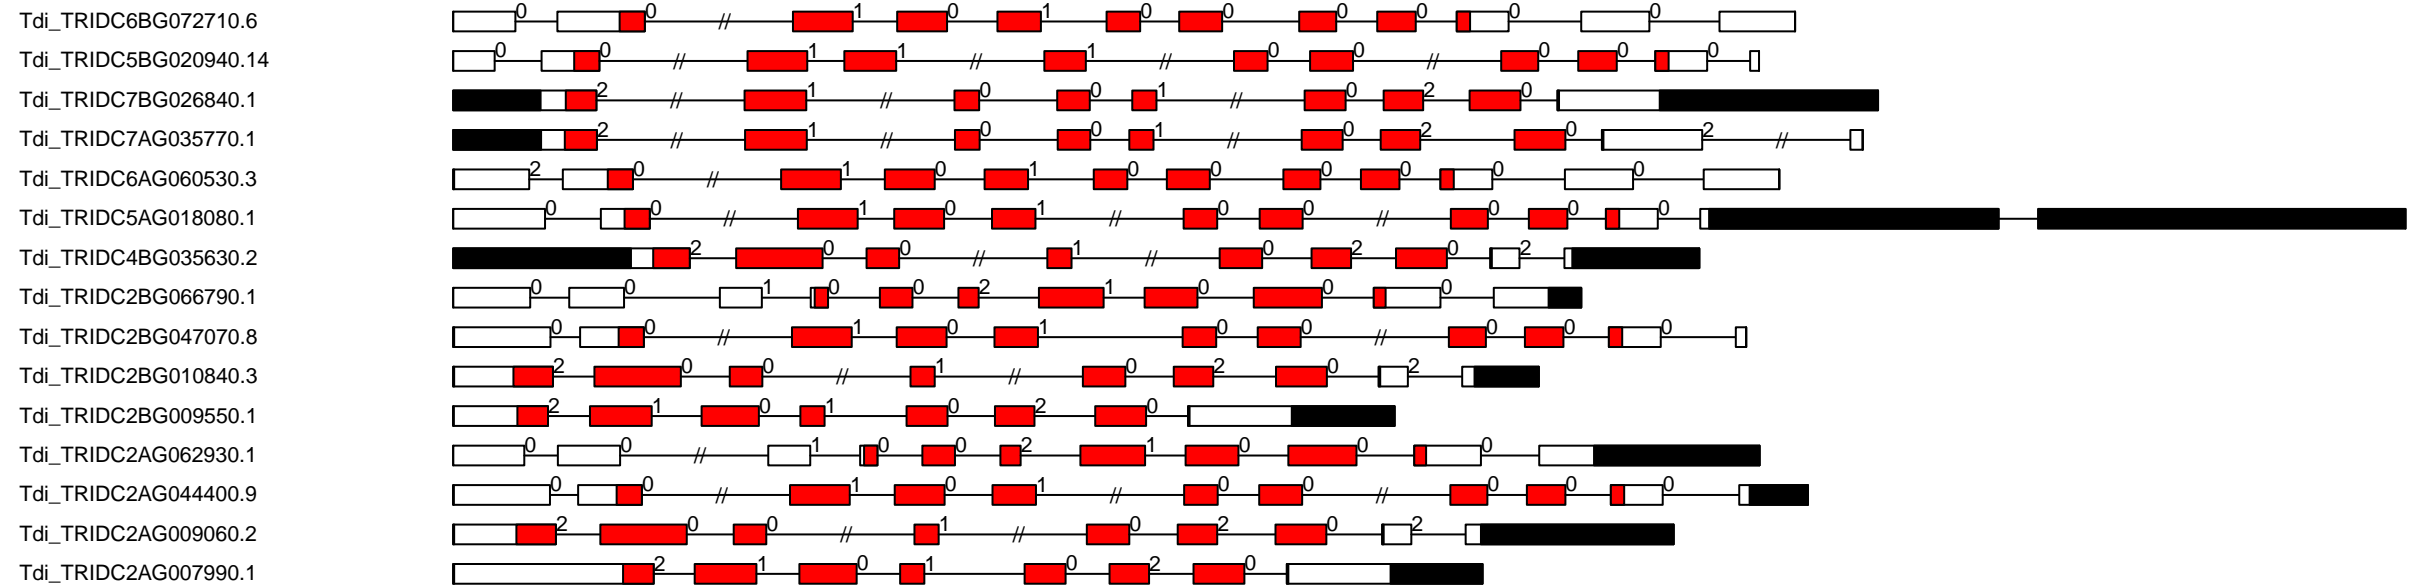

-1000

0

1000

2000

3000

4000

### T.di class III peroxidase IX subfamily exon-intron and prx domain diagram (part 1)

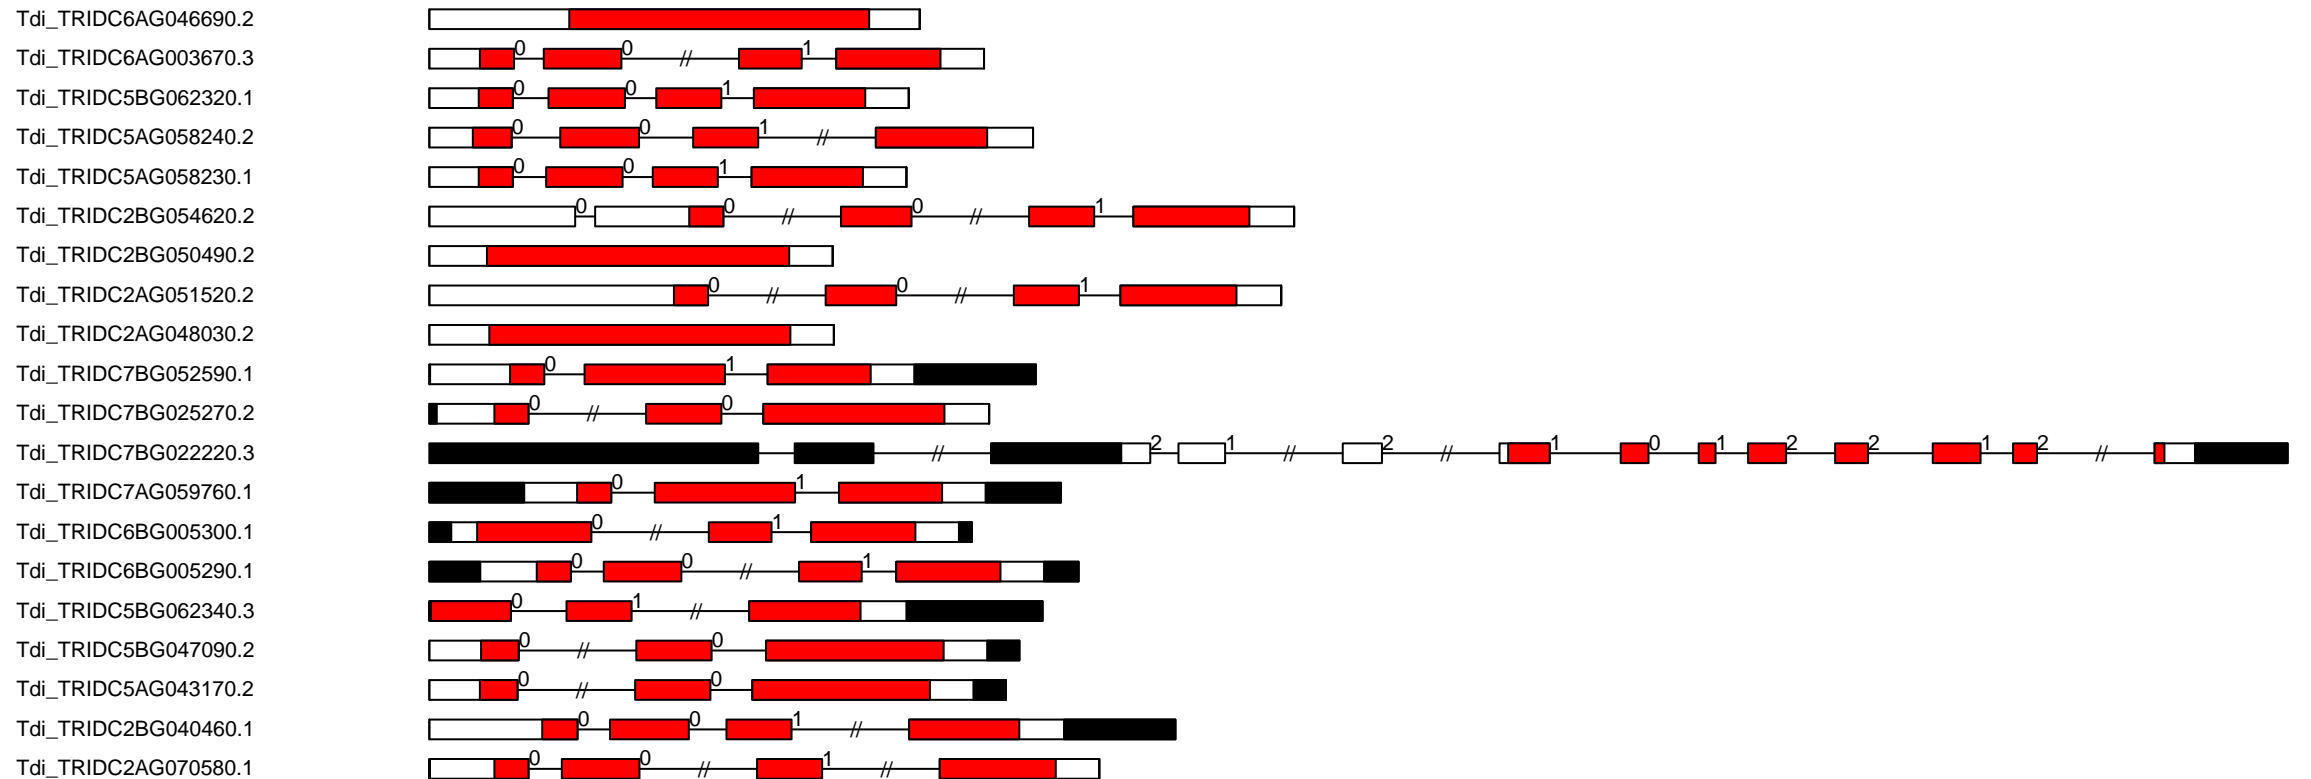

-1000

0

1000

2000

3000

4000



# T.di class III peroxidase IX subfamily exon-intron and prx domain diagram (part 2)

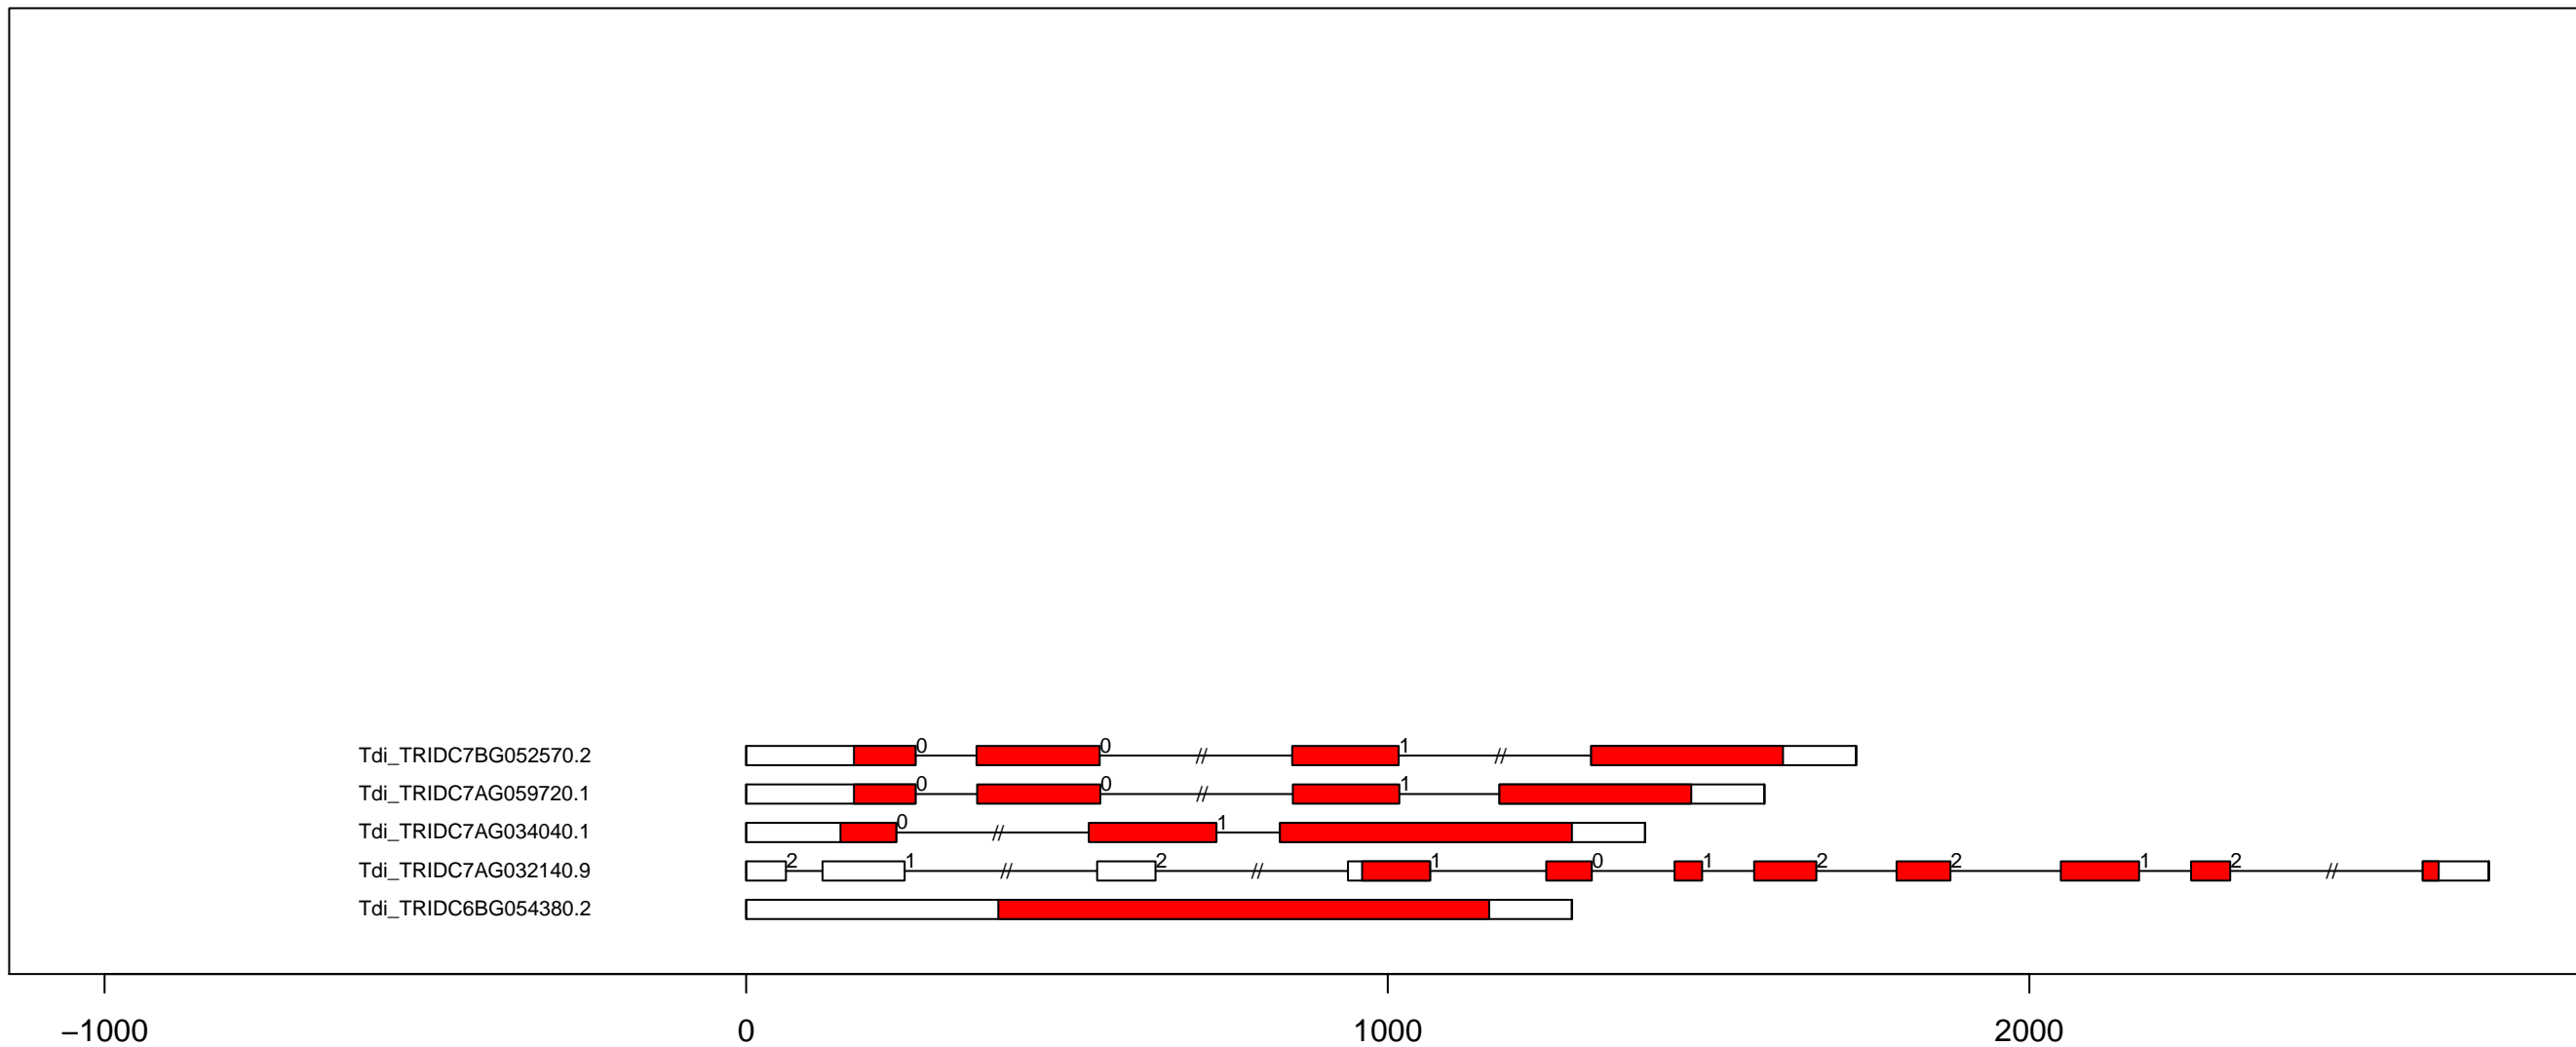



# T.di class III peroxidase XI subfamily exon-intron and prx domain diagram (all)

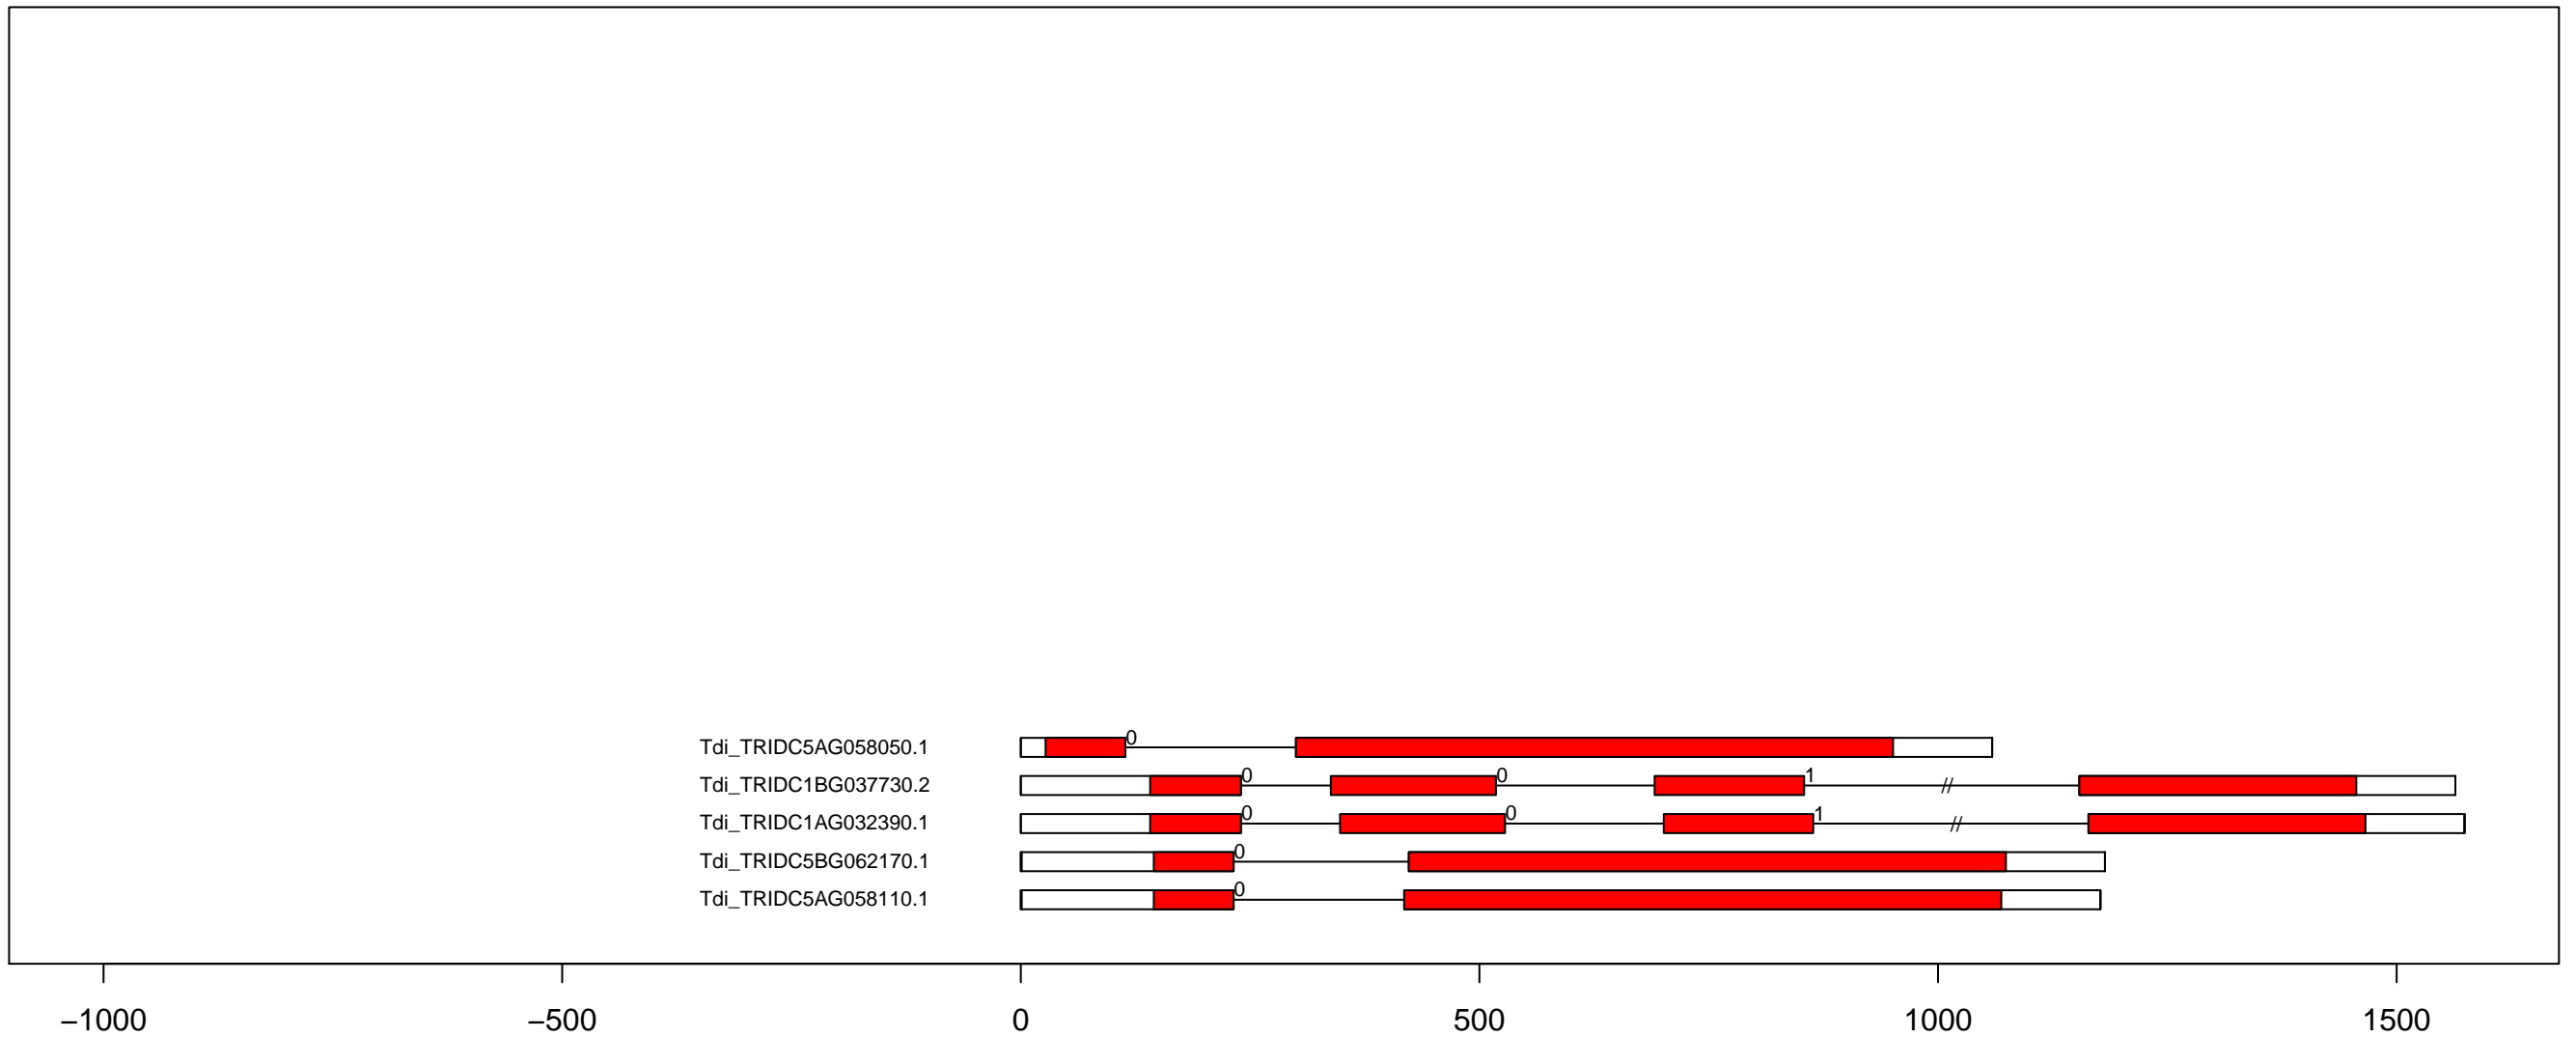

### T.di class III peroxidase XII subfamily exon-intron and prx domain diagram (all)

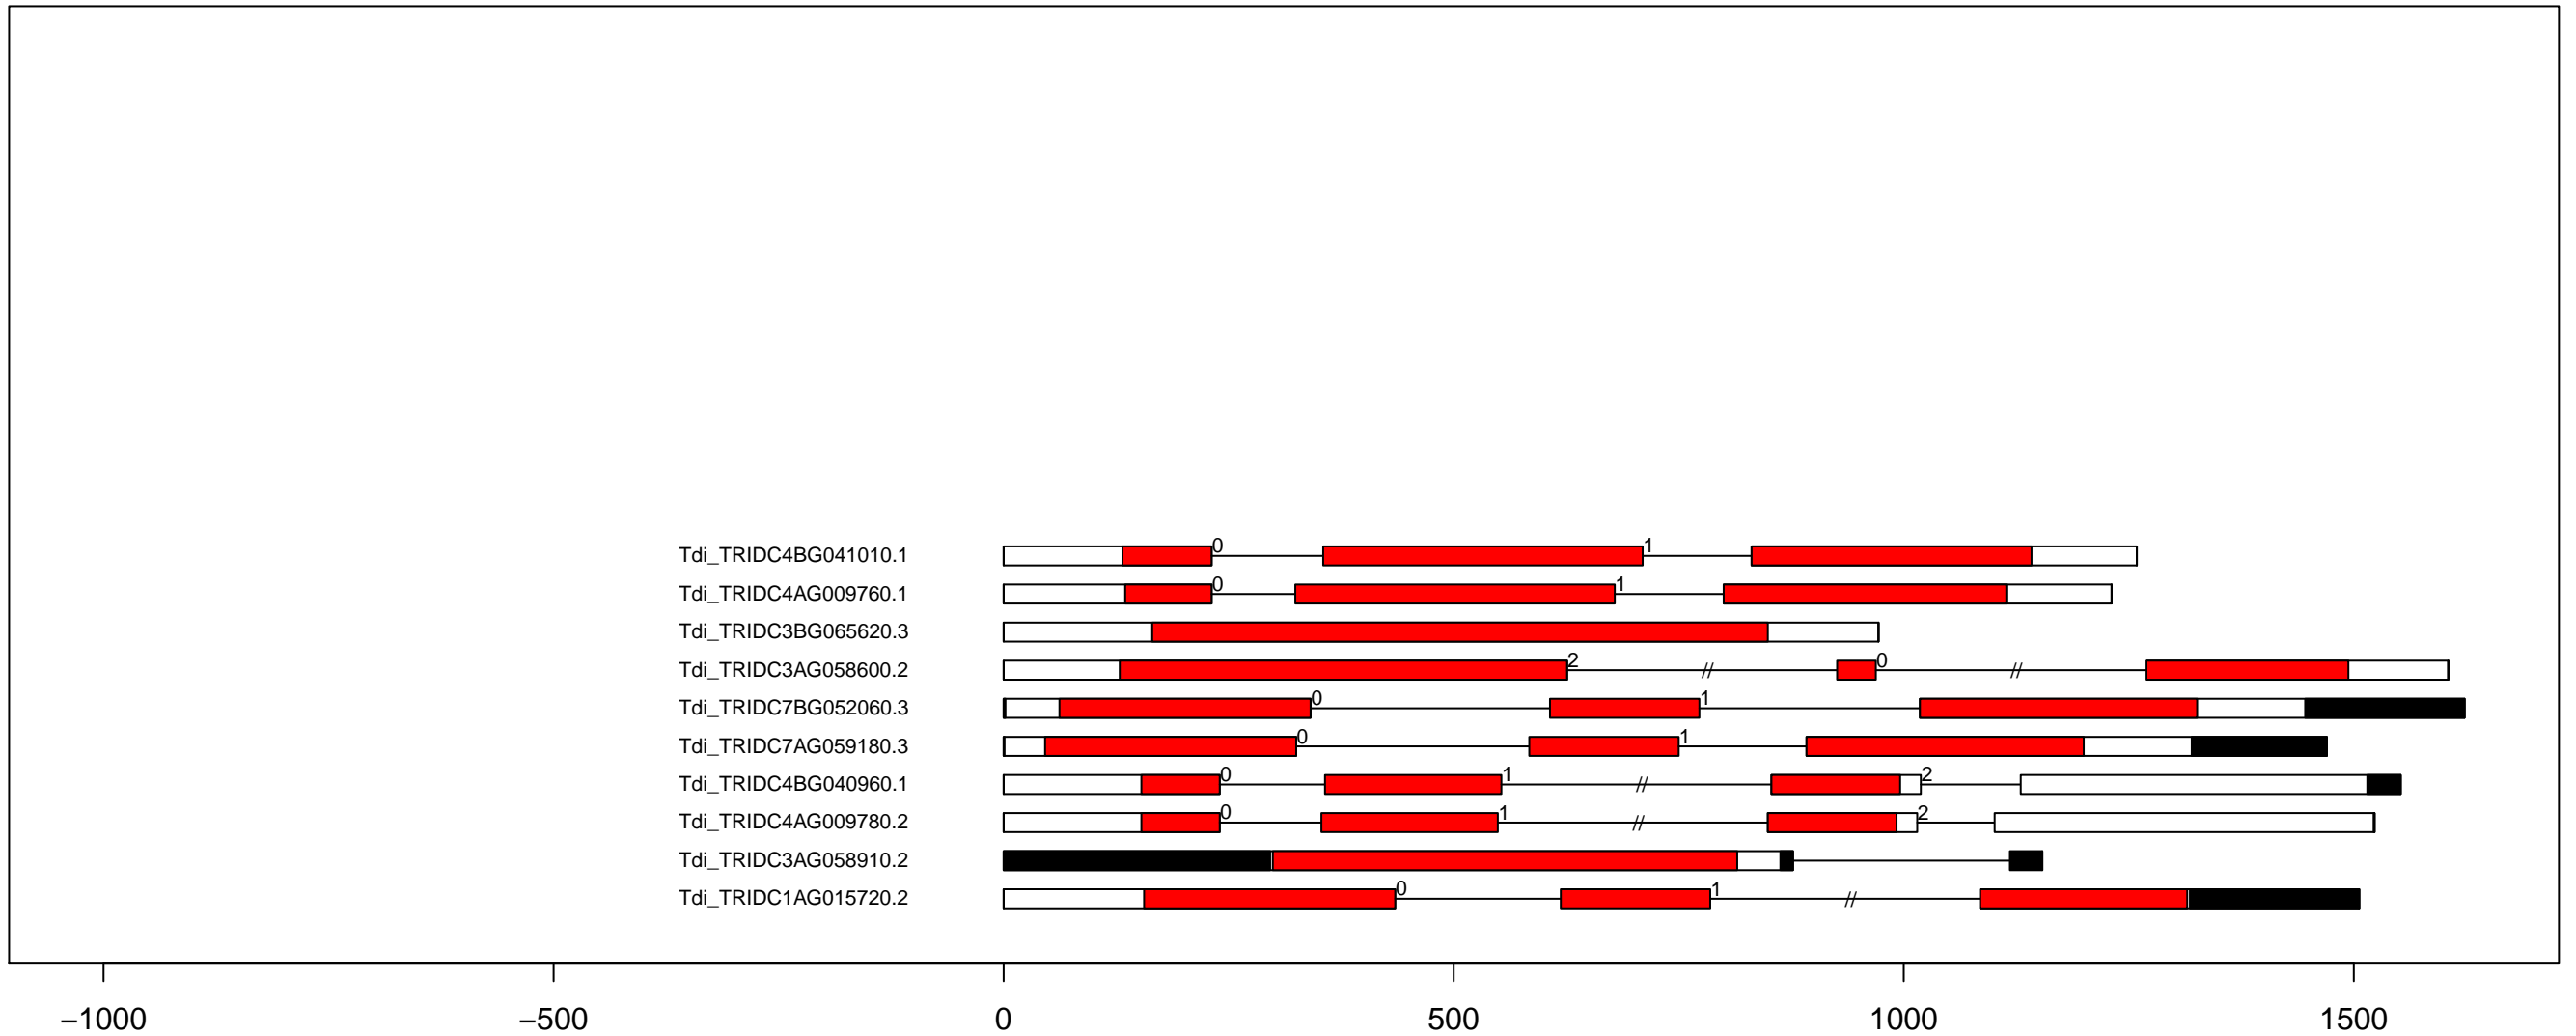

# T.di class III peroxidase XIII subfamily exon-intron and prx domain diagram (all)

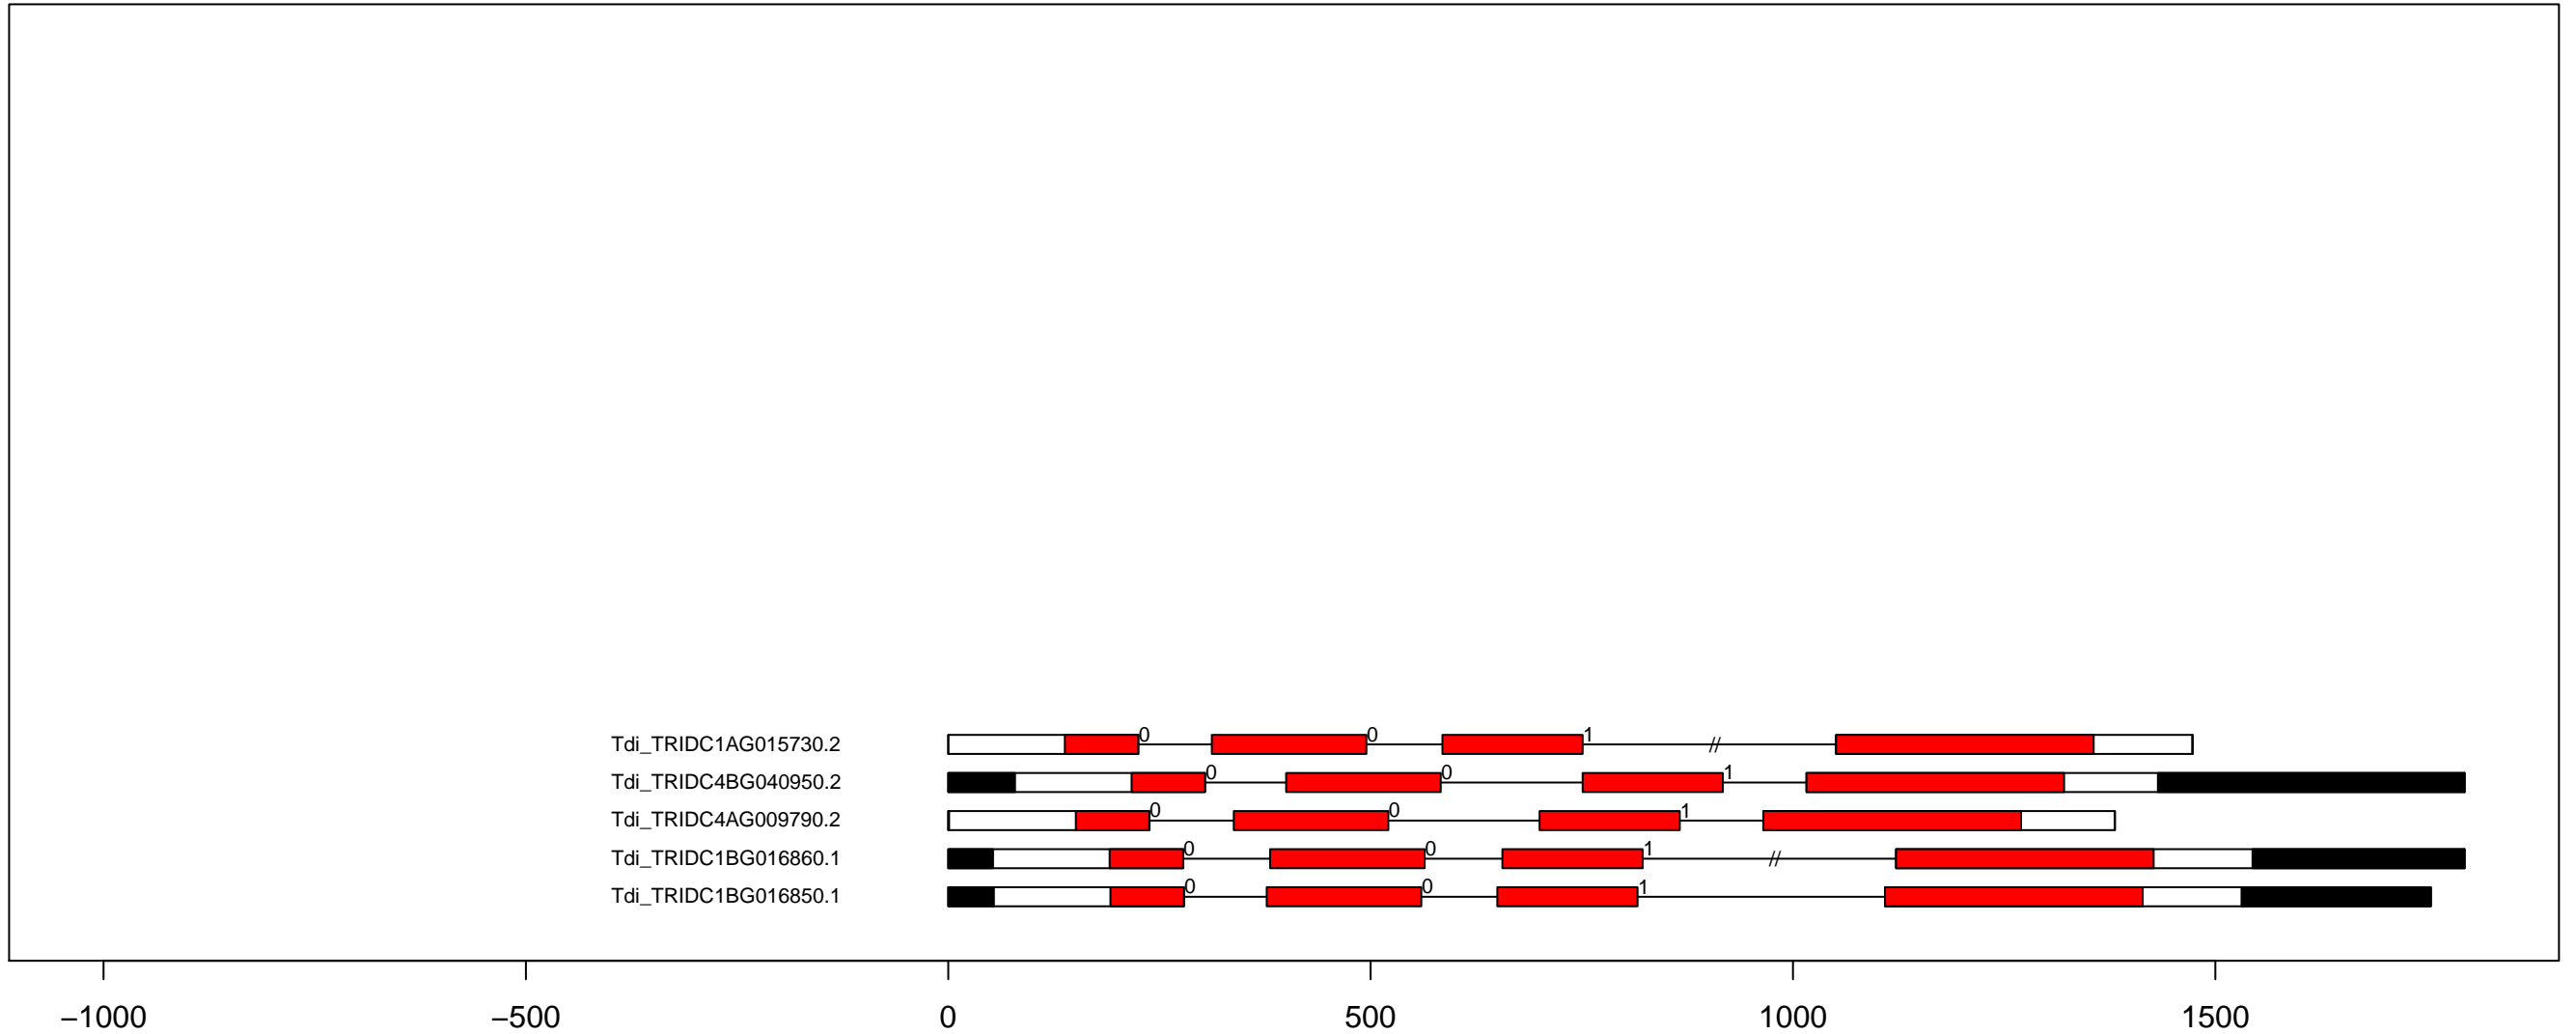

# T.di class III peroxidase XIV subfamily exon-intron and prx domain diagram (all)

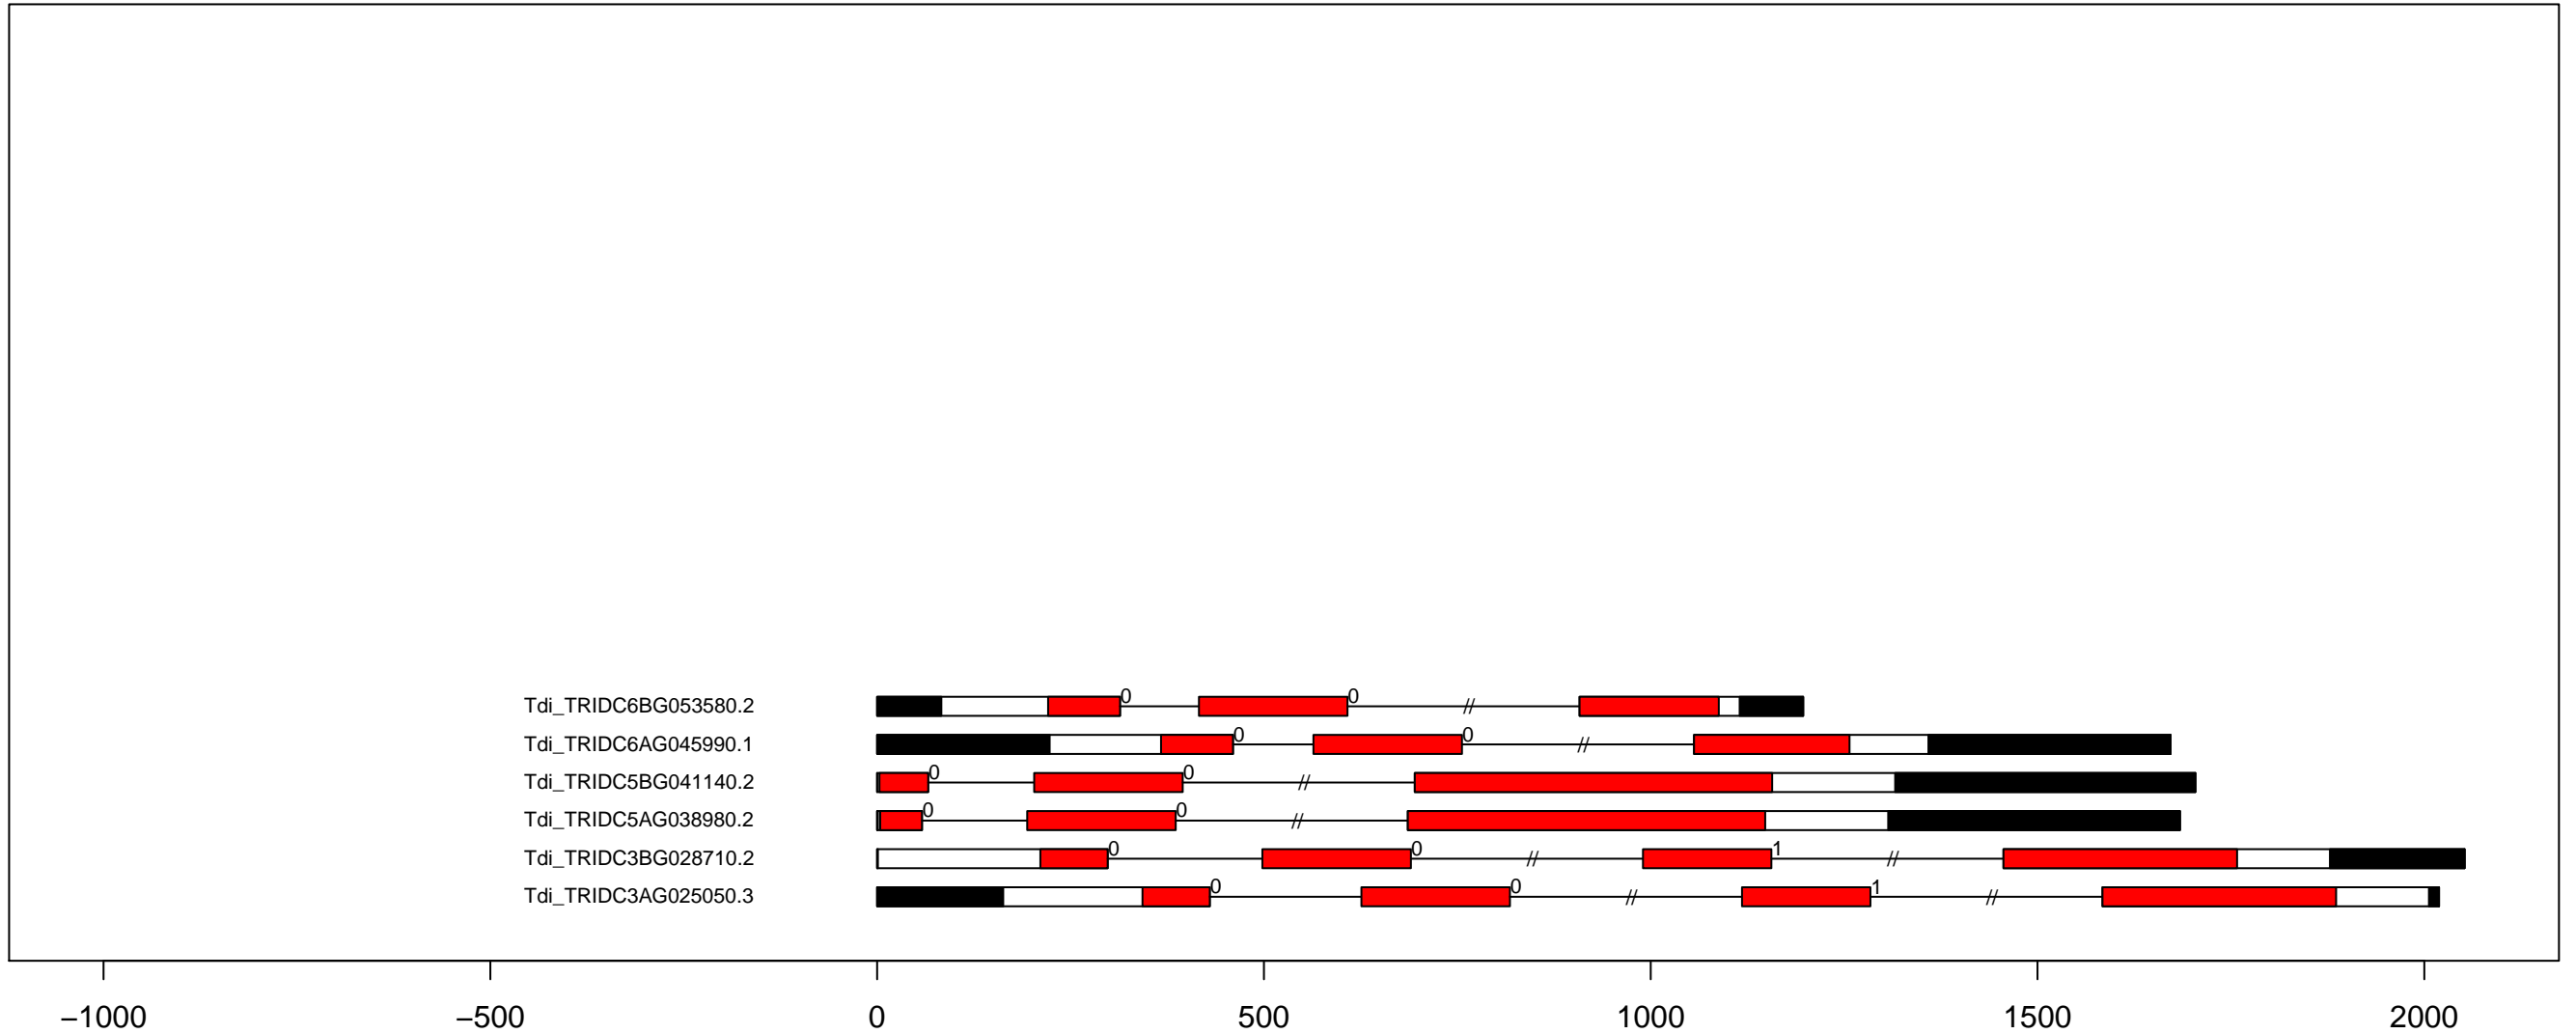

# T.di class III peroxidase XV subfamily exon-intron and prx domain diagram (all)

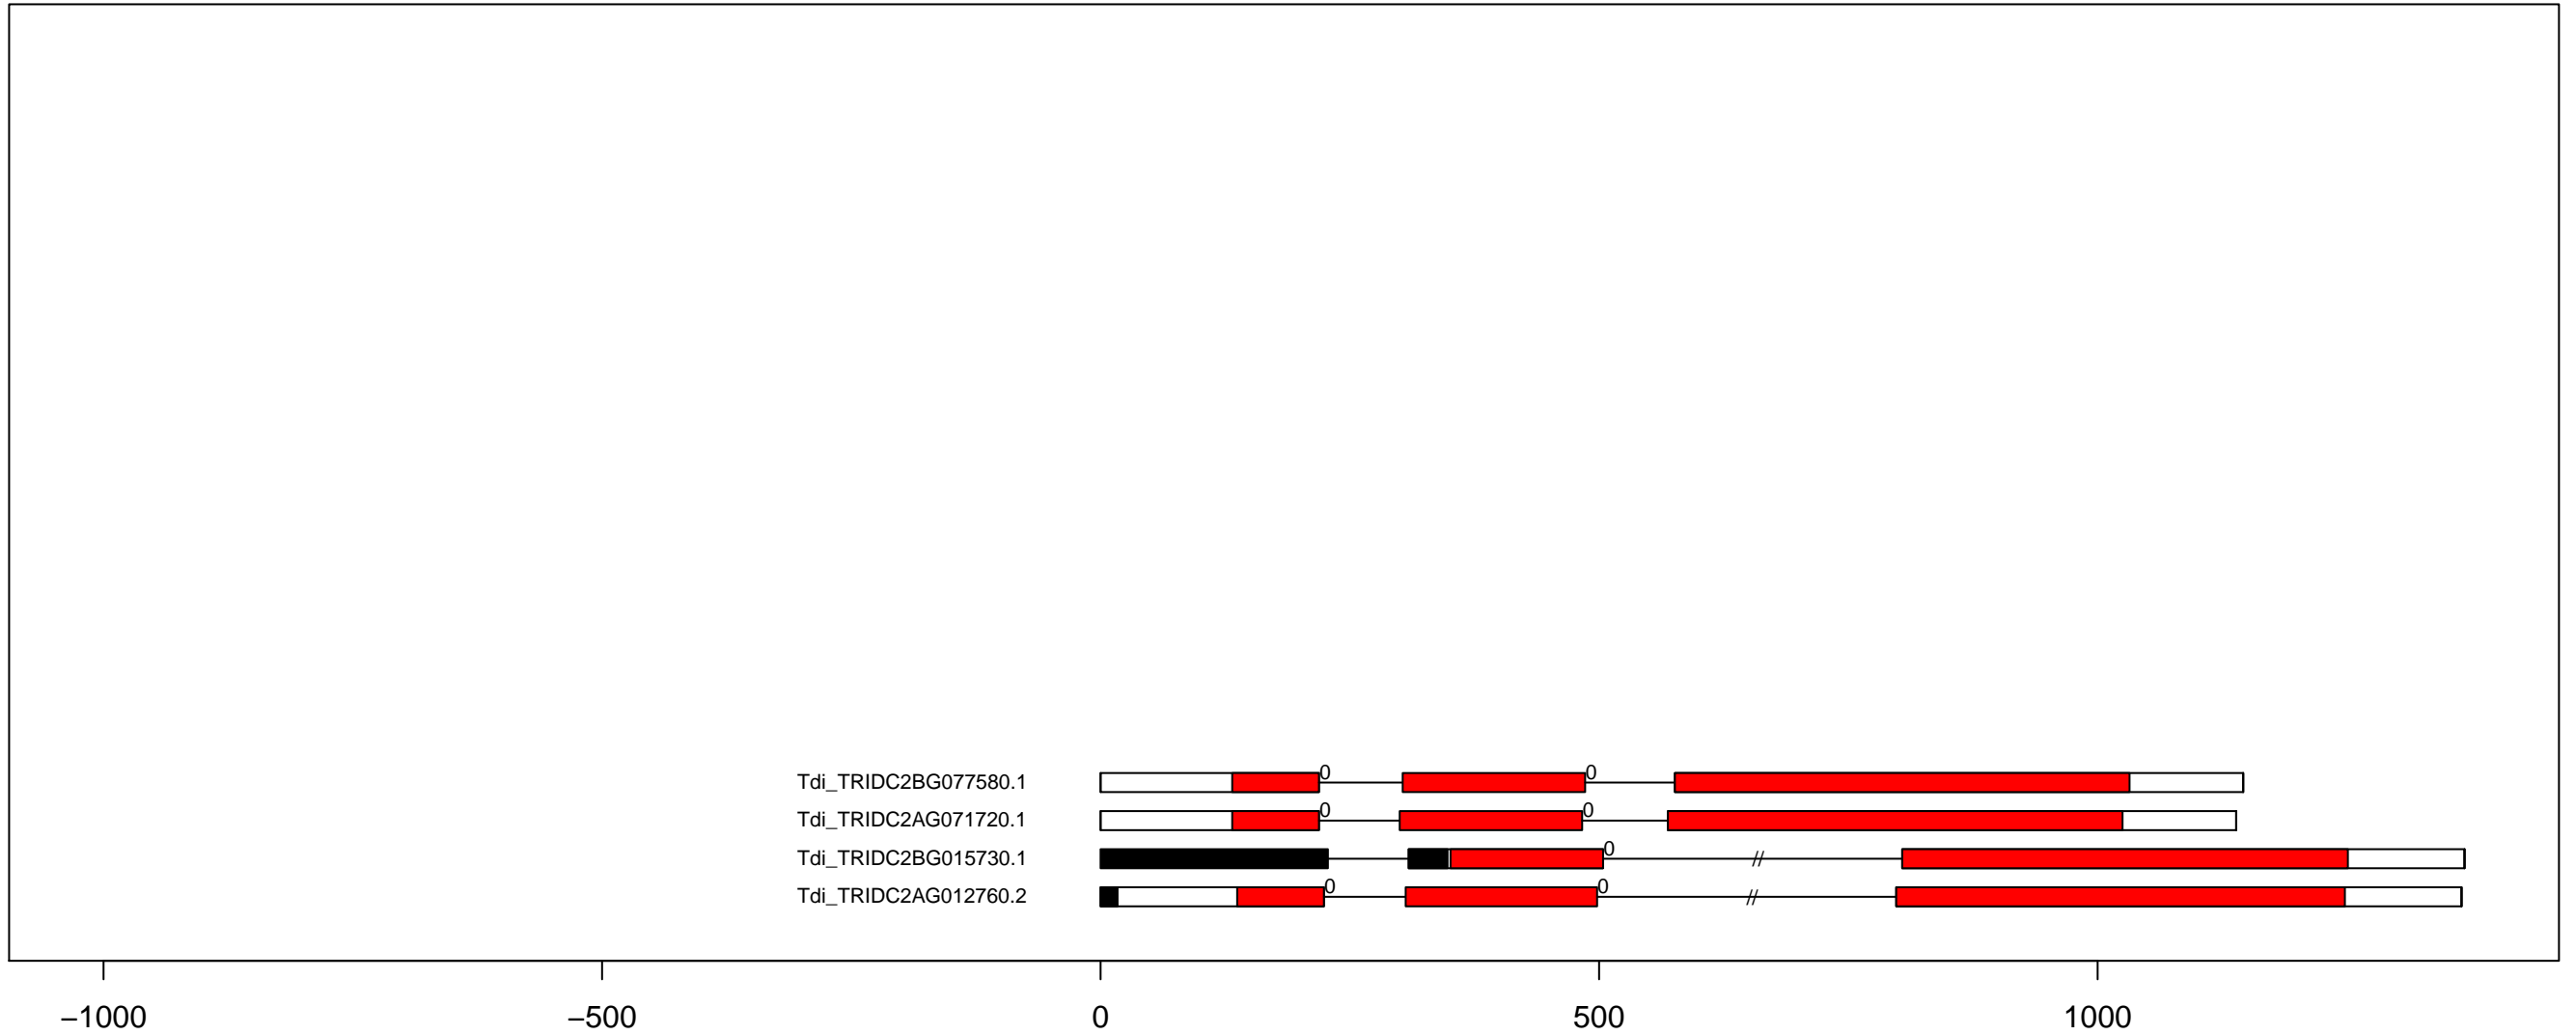

### T.di class III peroxidase XVI subfamily exon-intron and prx domain diagram (part 1)

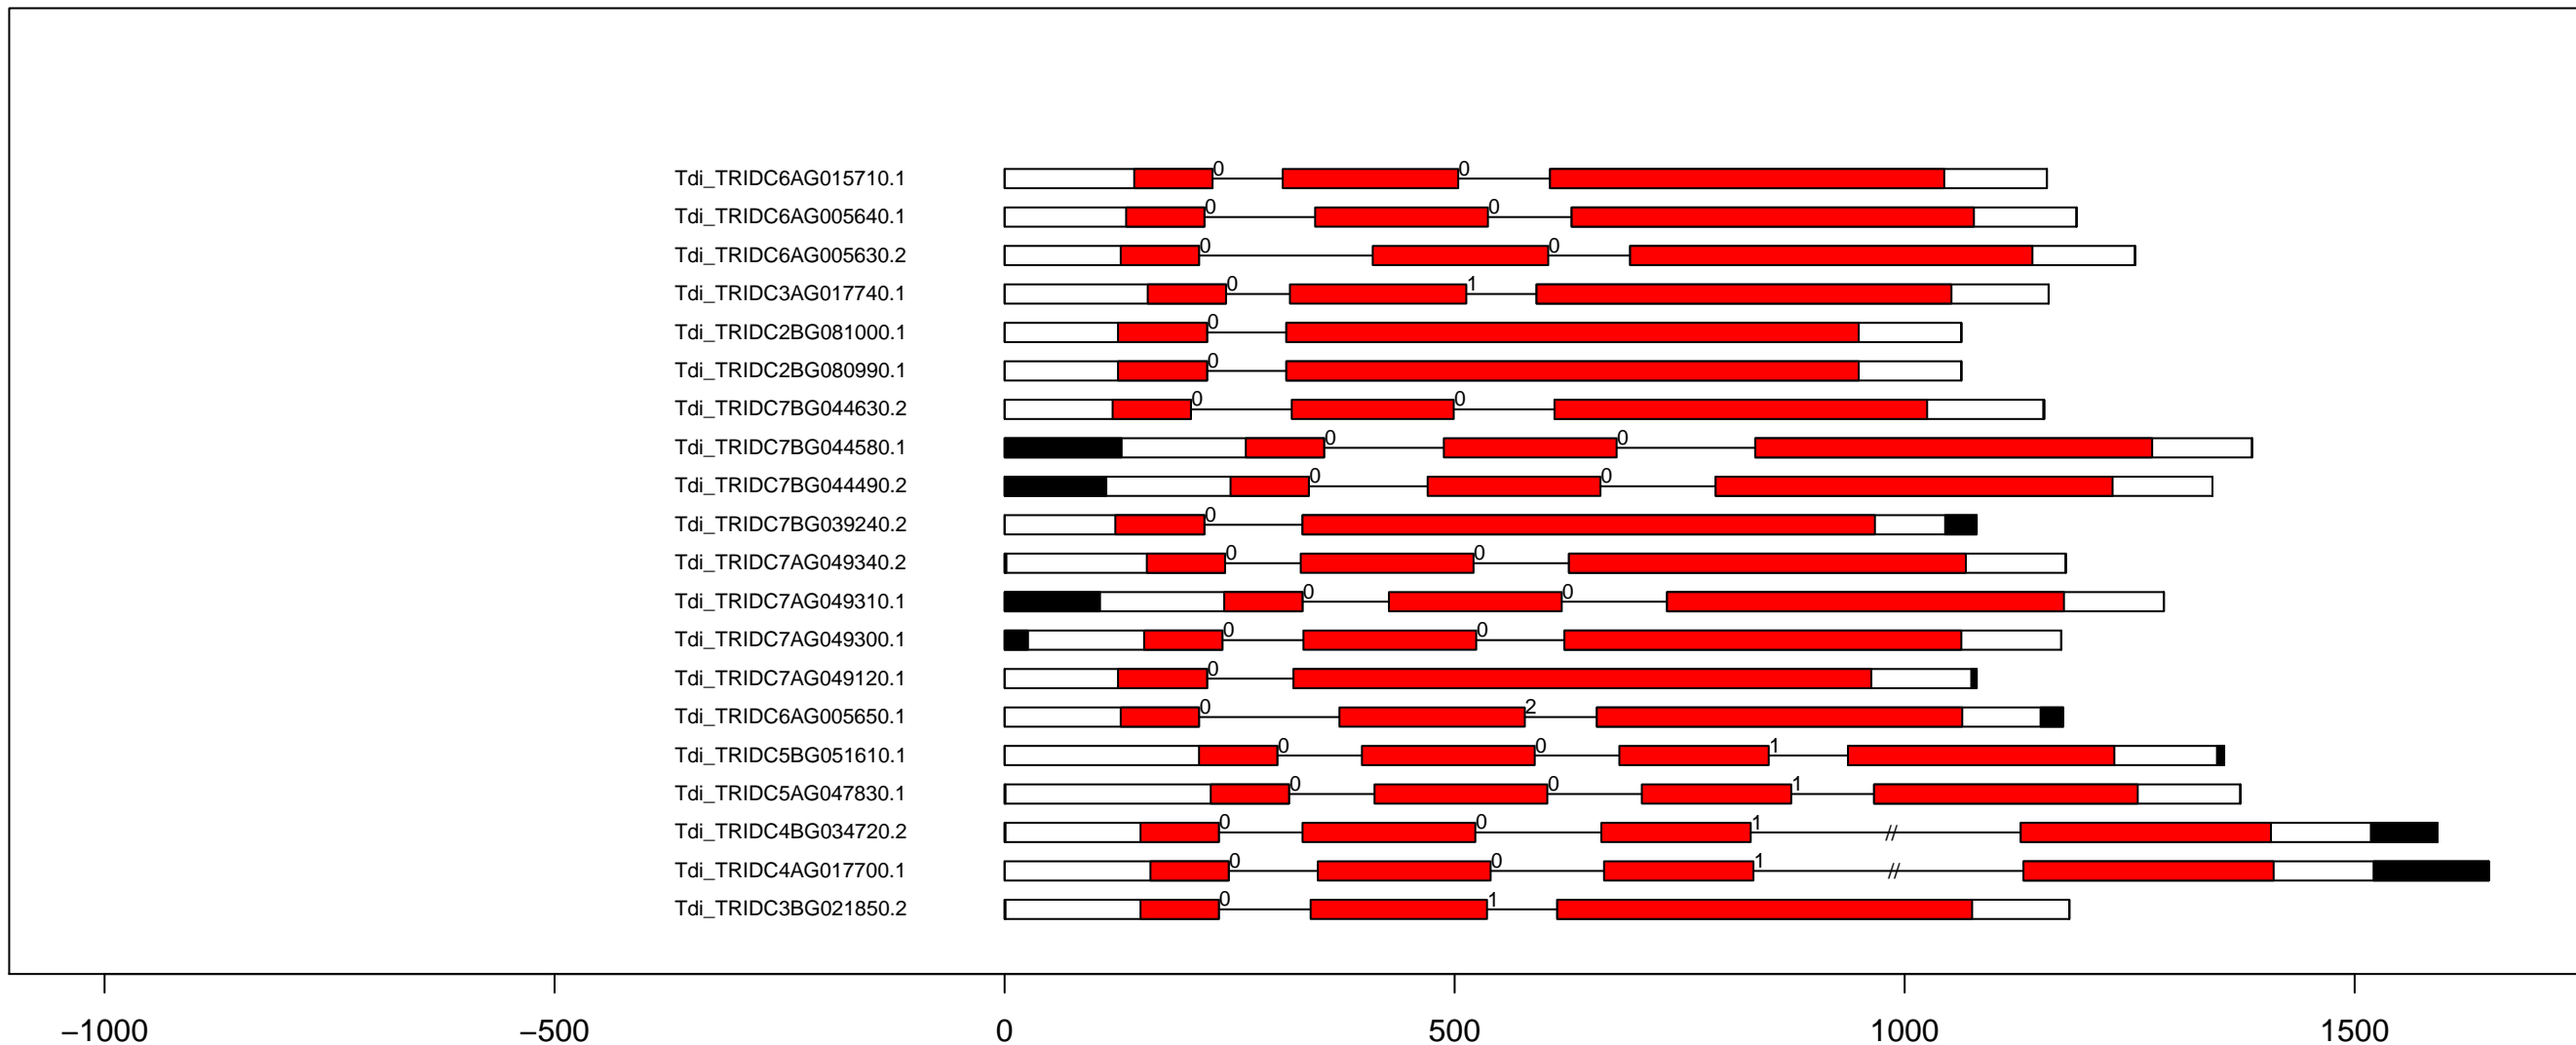



### T.di class III peroxidase XVI subfamily exon-intron and prx domain diagram (part 2)

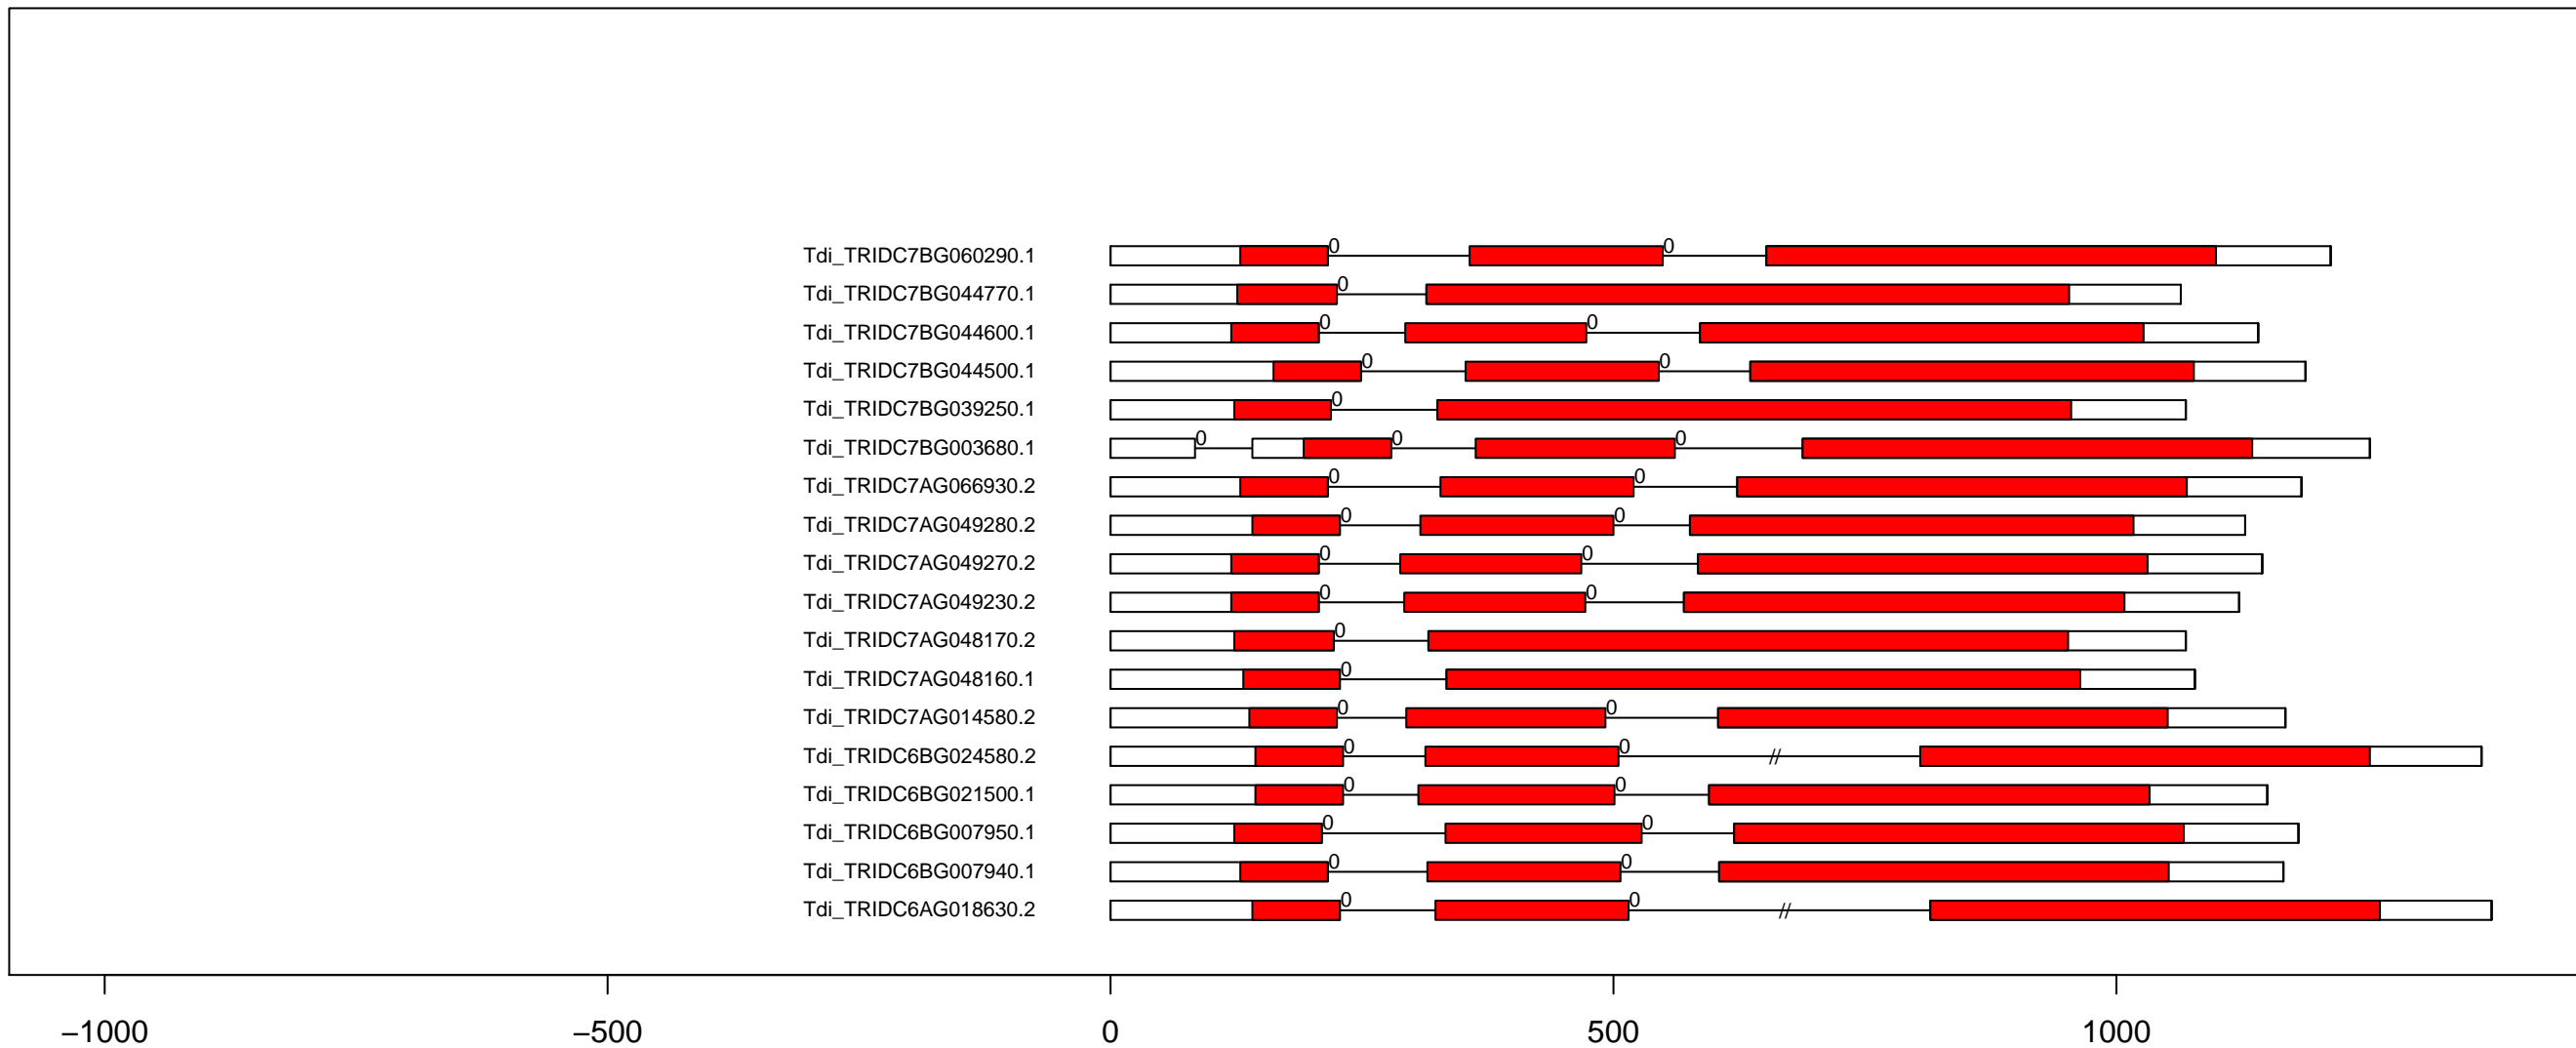

### T.di class III peroxidase XVII subfamily exon-intron and prx domain diagram (part 1)

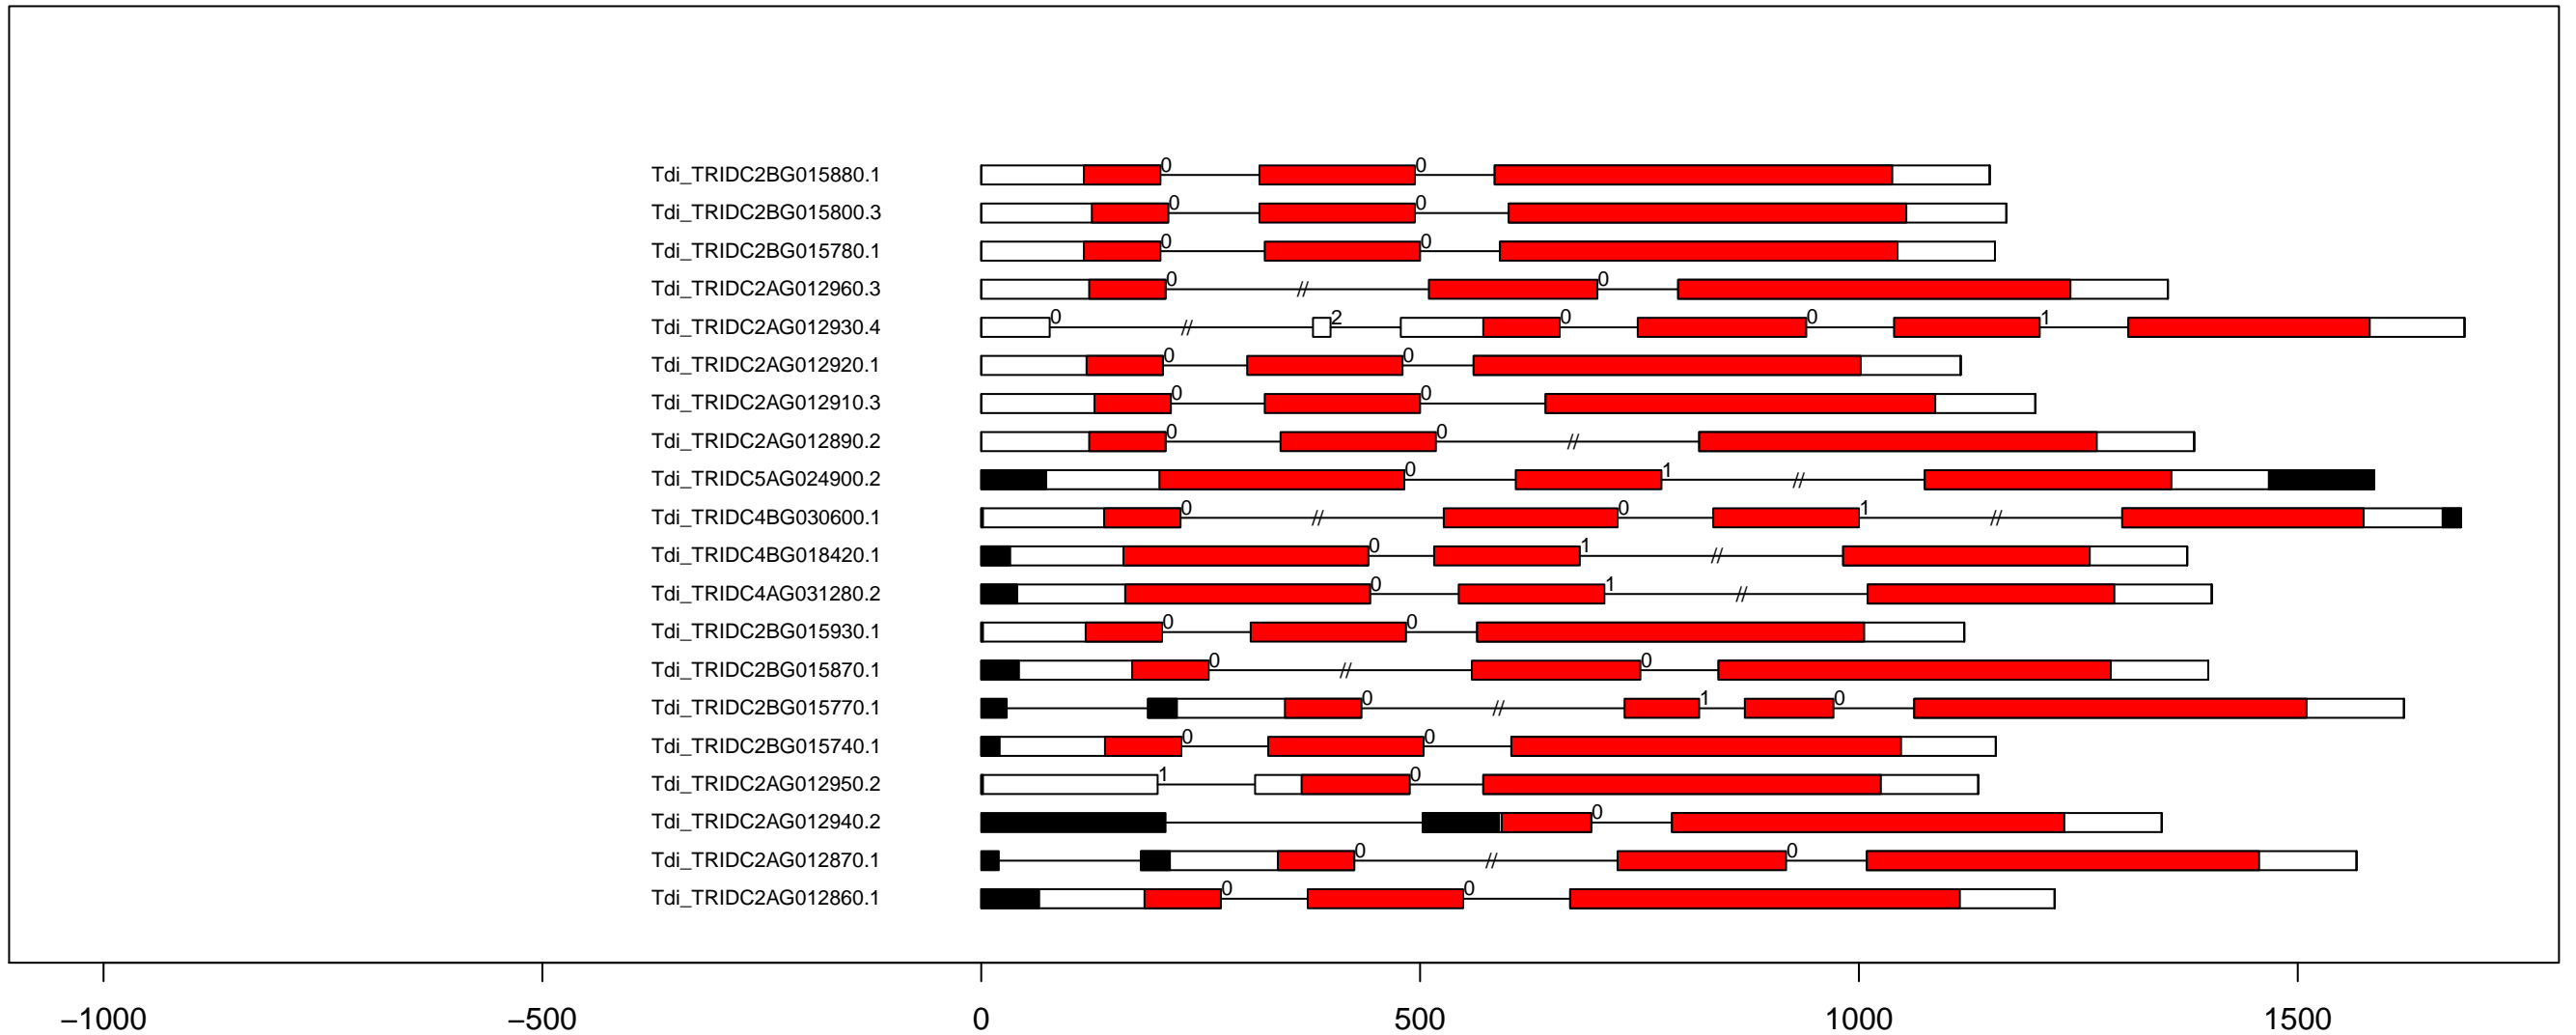

### T.di class III peroxidase XVII subfamily exon-intron and prx domain diagram (part 2)

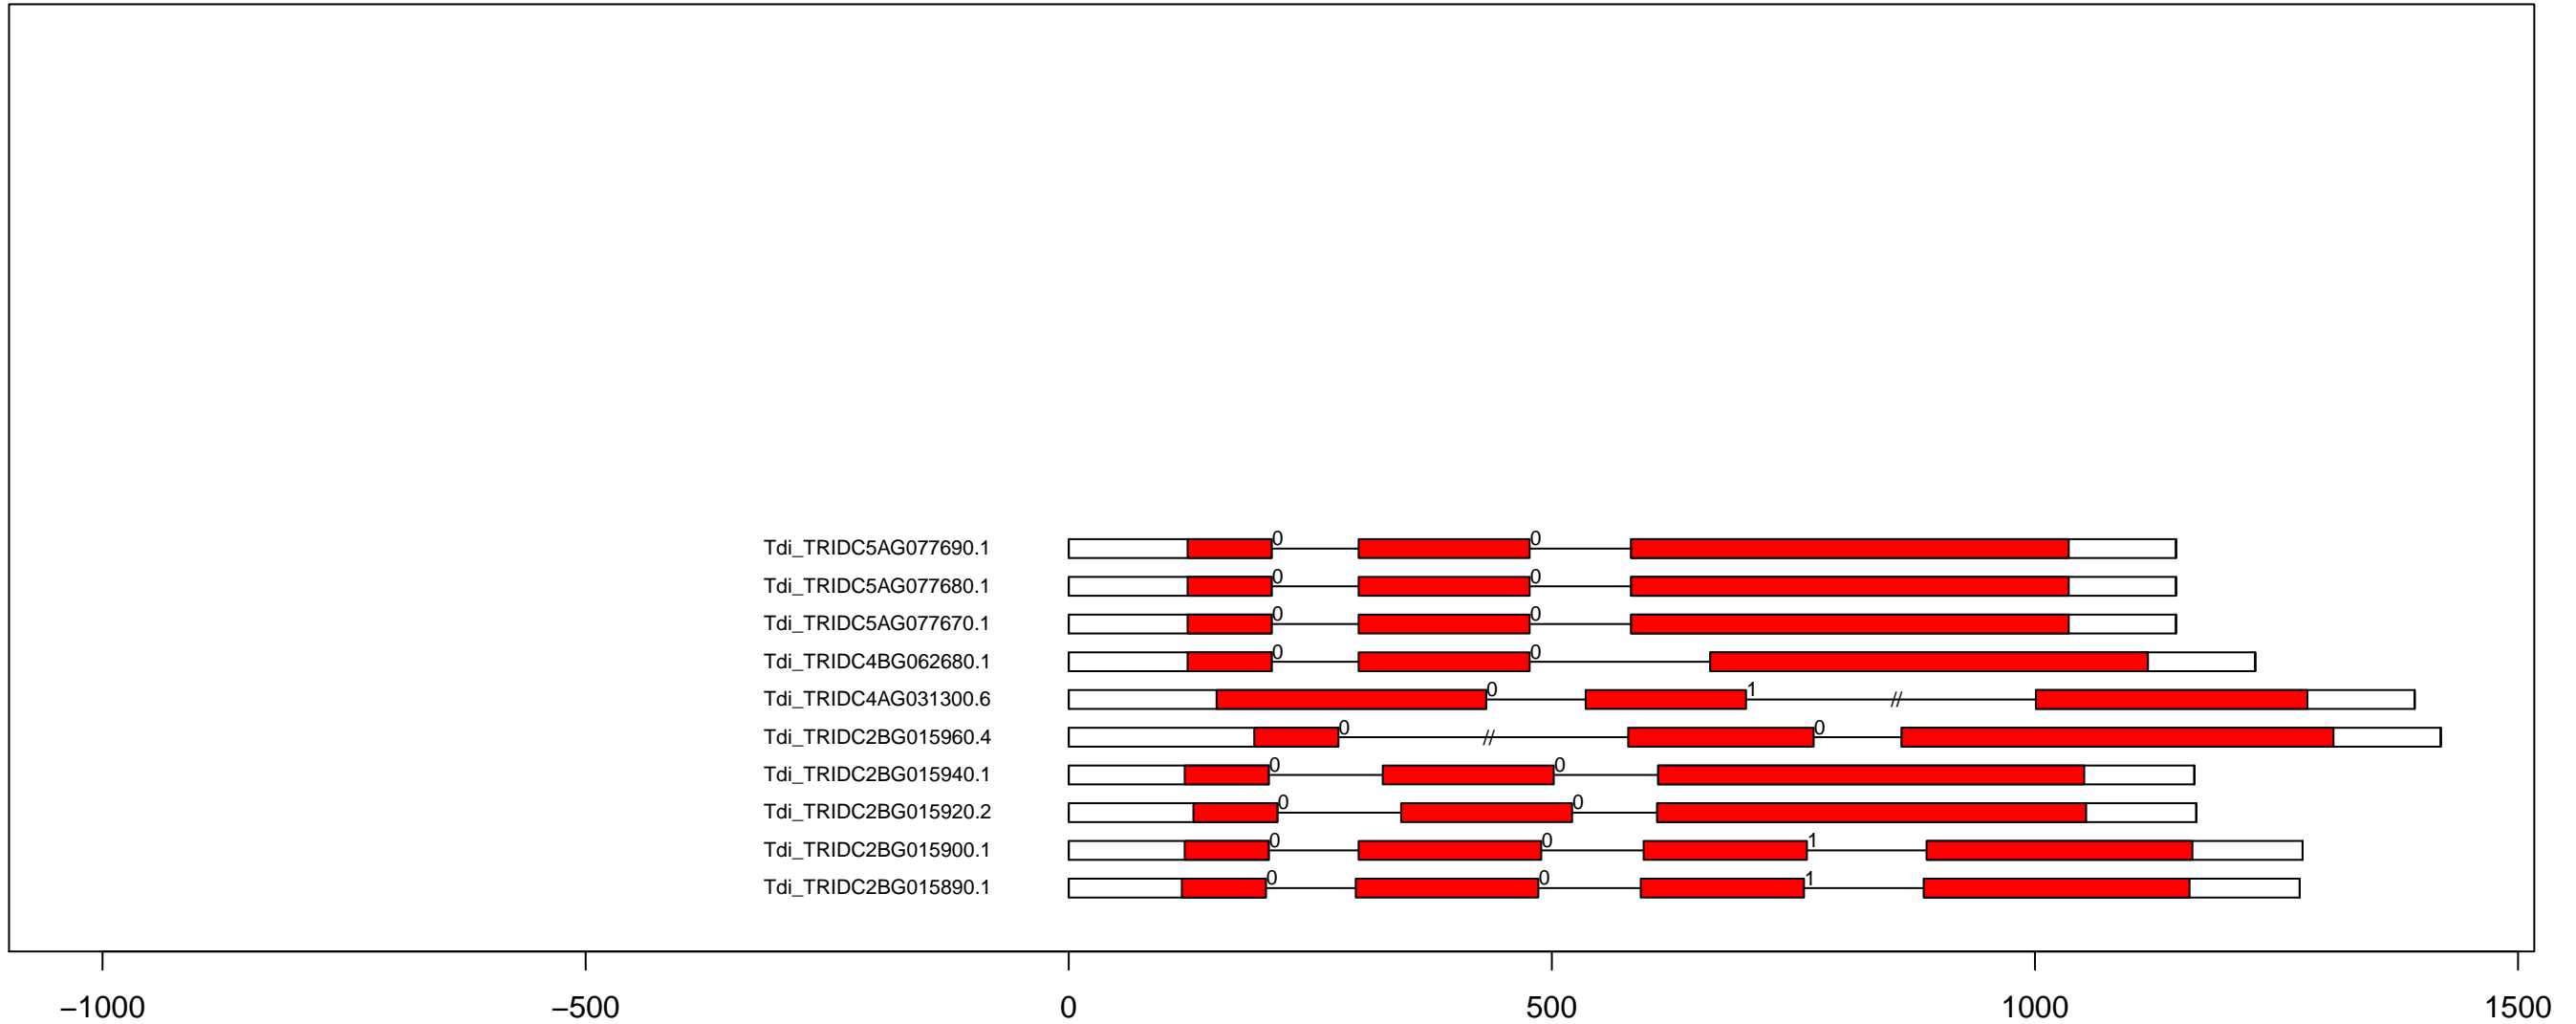

# T.di class III peroxidase XVIII subfamily exon-intron and prx domain diagram (all)

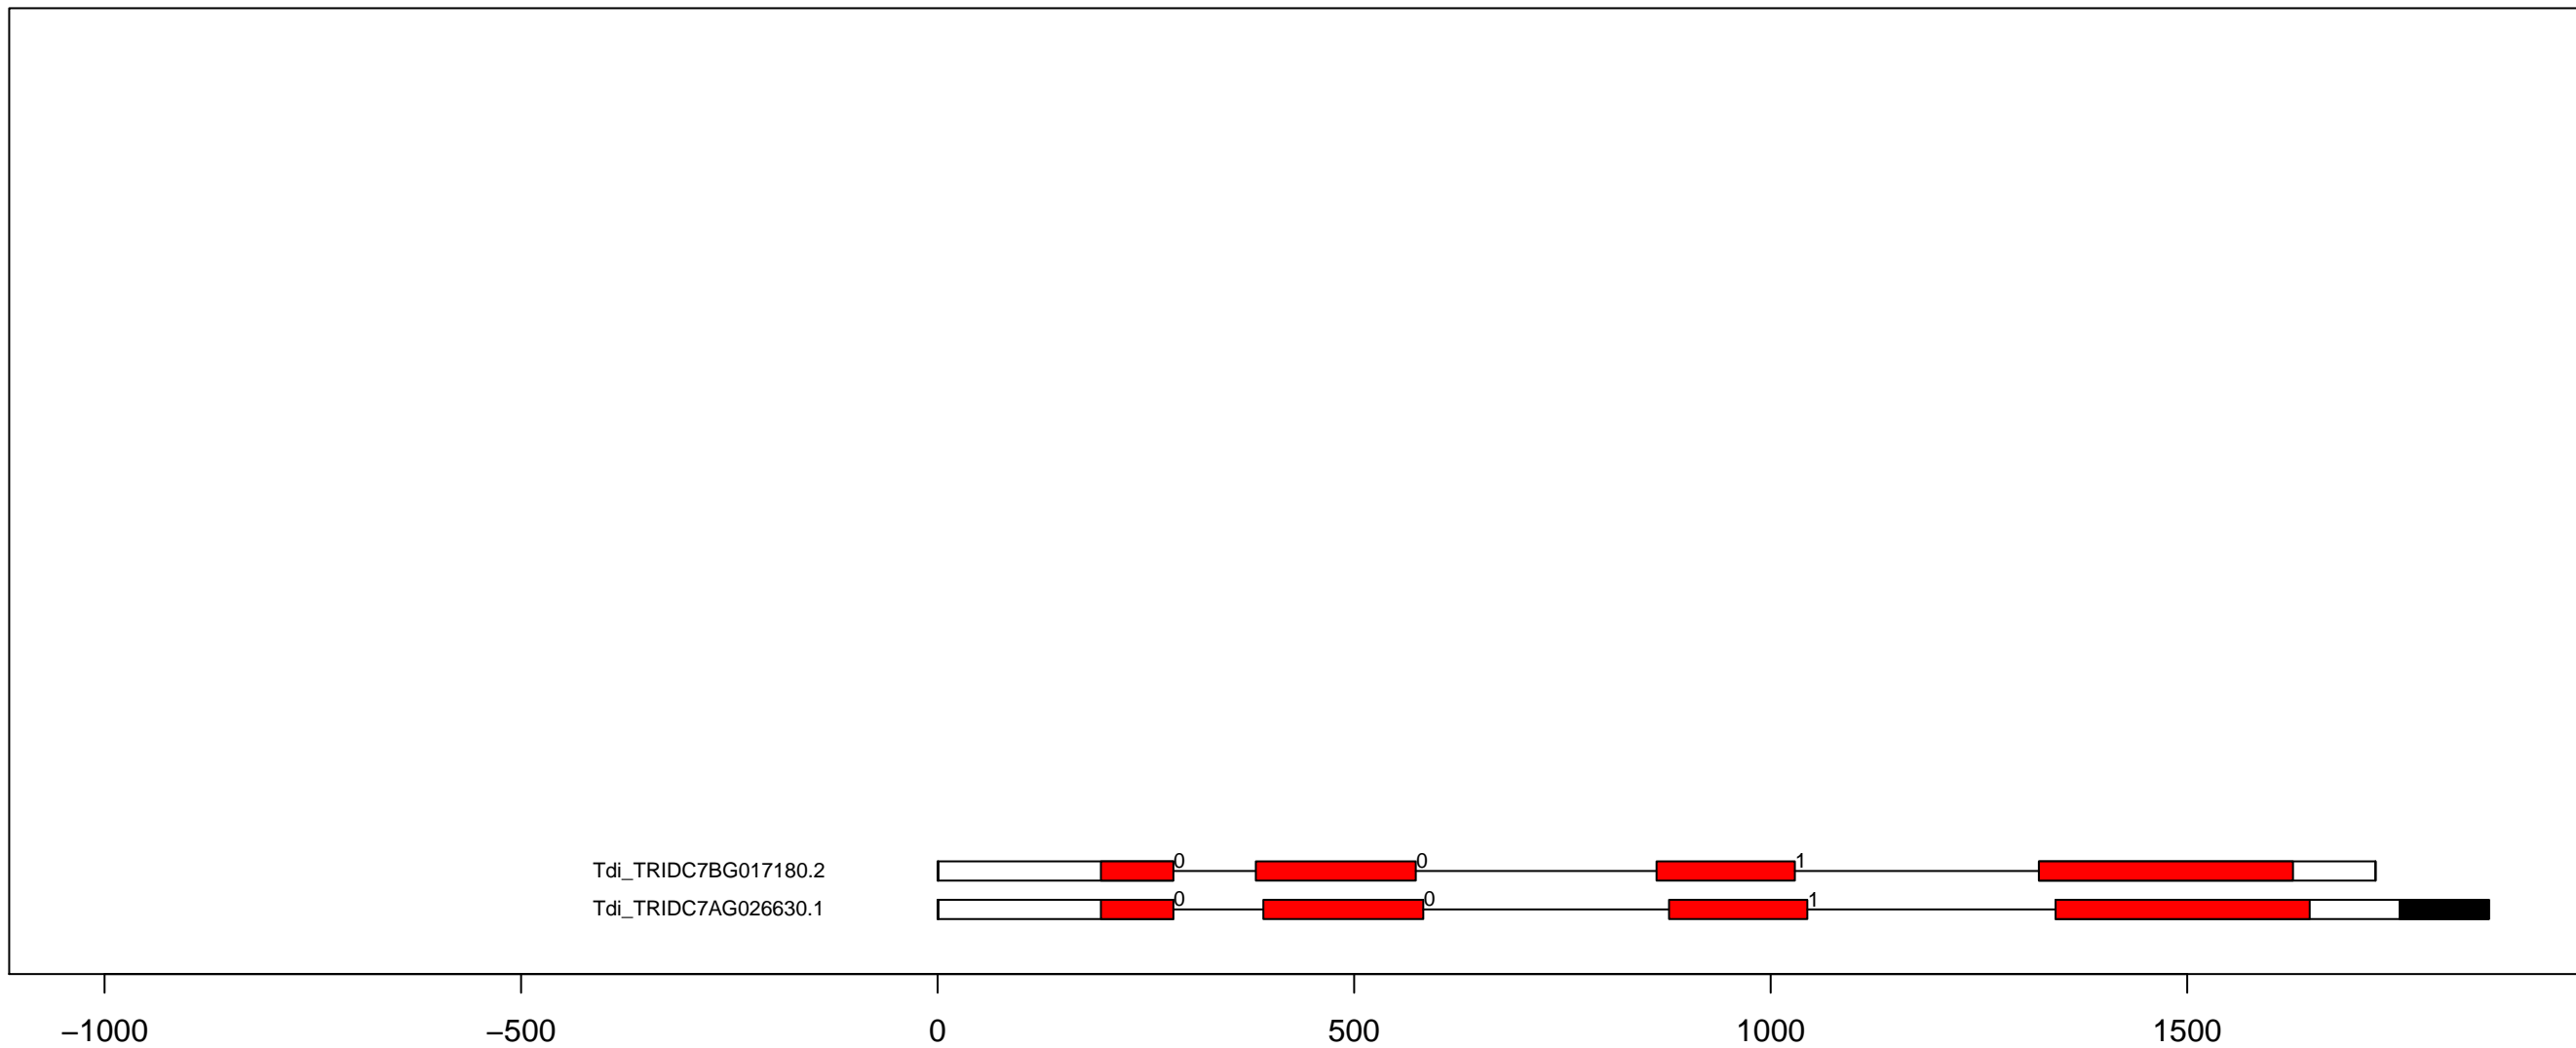

# T.di class III peroxidase unclar\_classifications subfamily exon-intron and prx domain diagram (all)

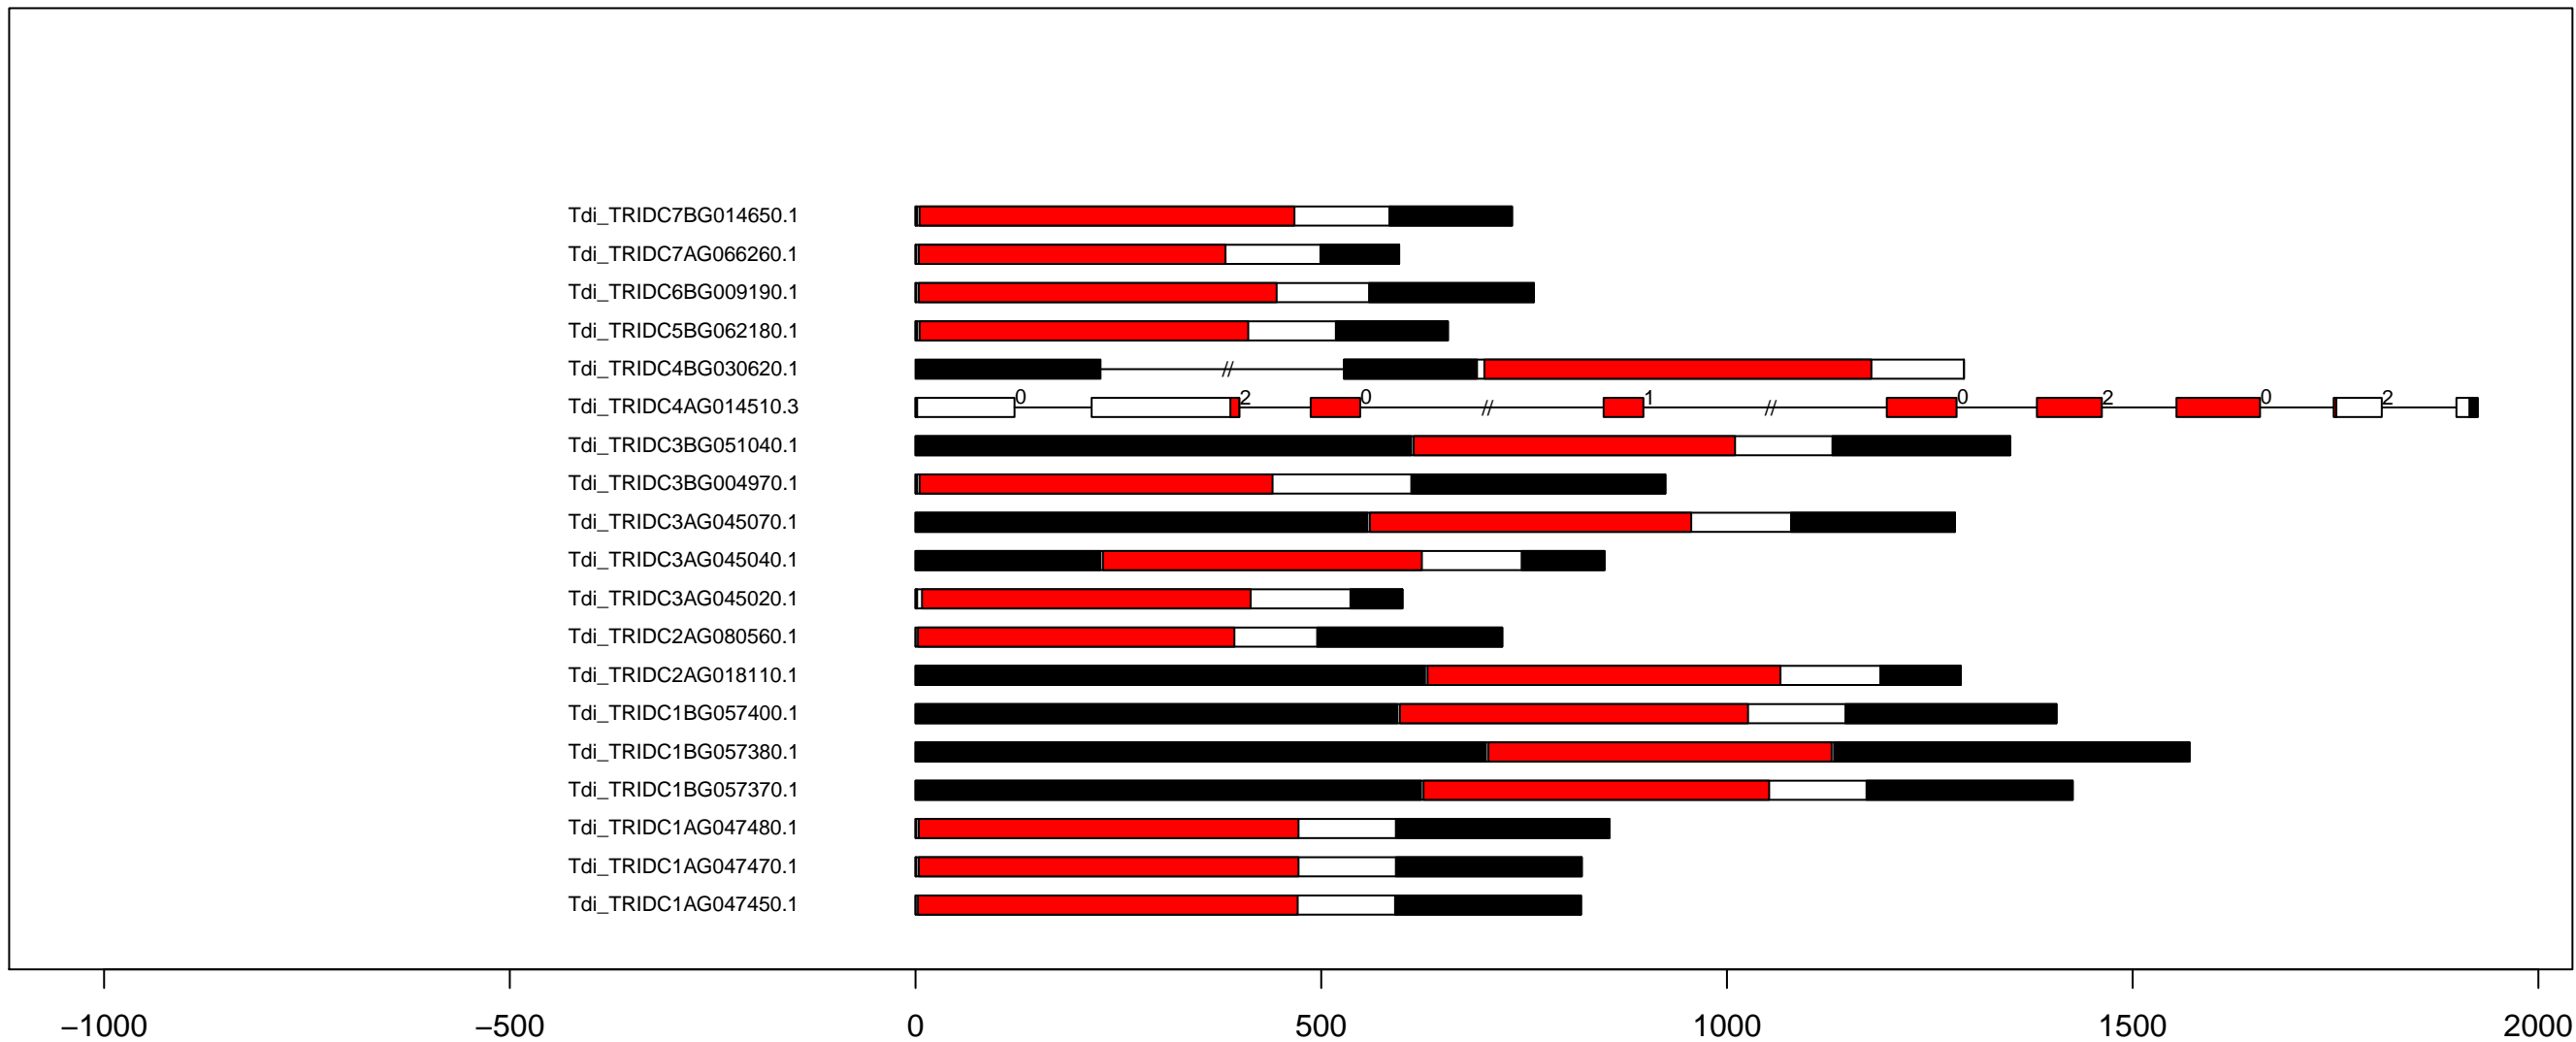

### T.ur class III peroxidase I subfamily exon-intron and prx domain diagram (part 1)

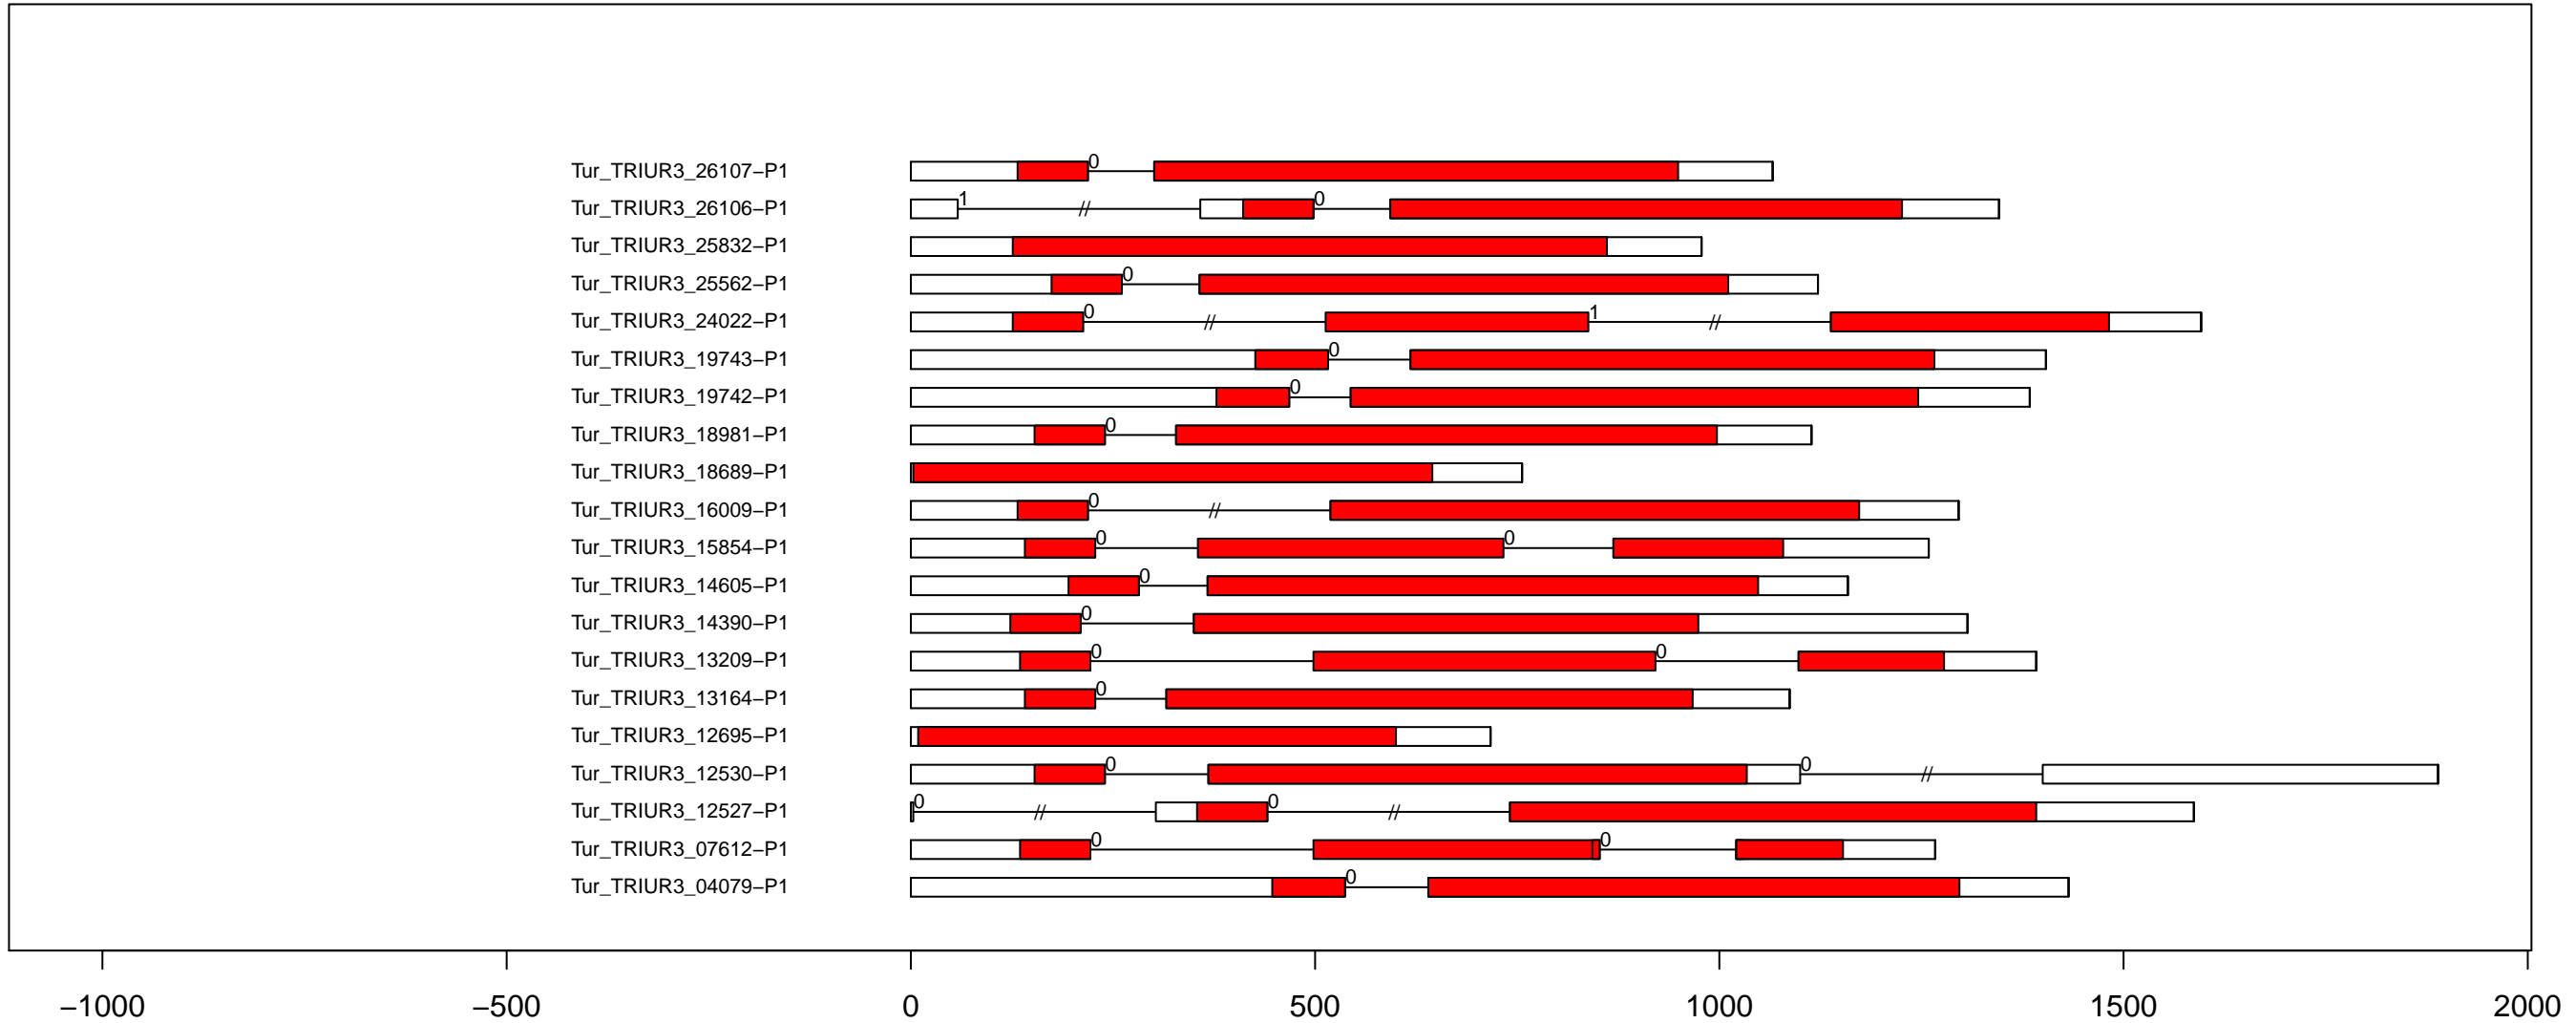

### T.ur class III peroxidase I subfamily exon-intron and prx domain diagram (part 2)

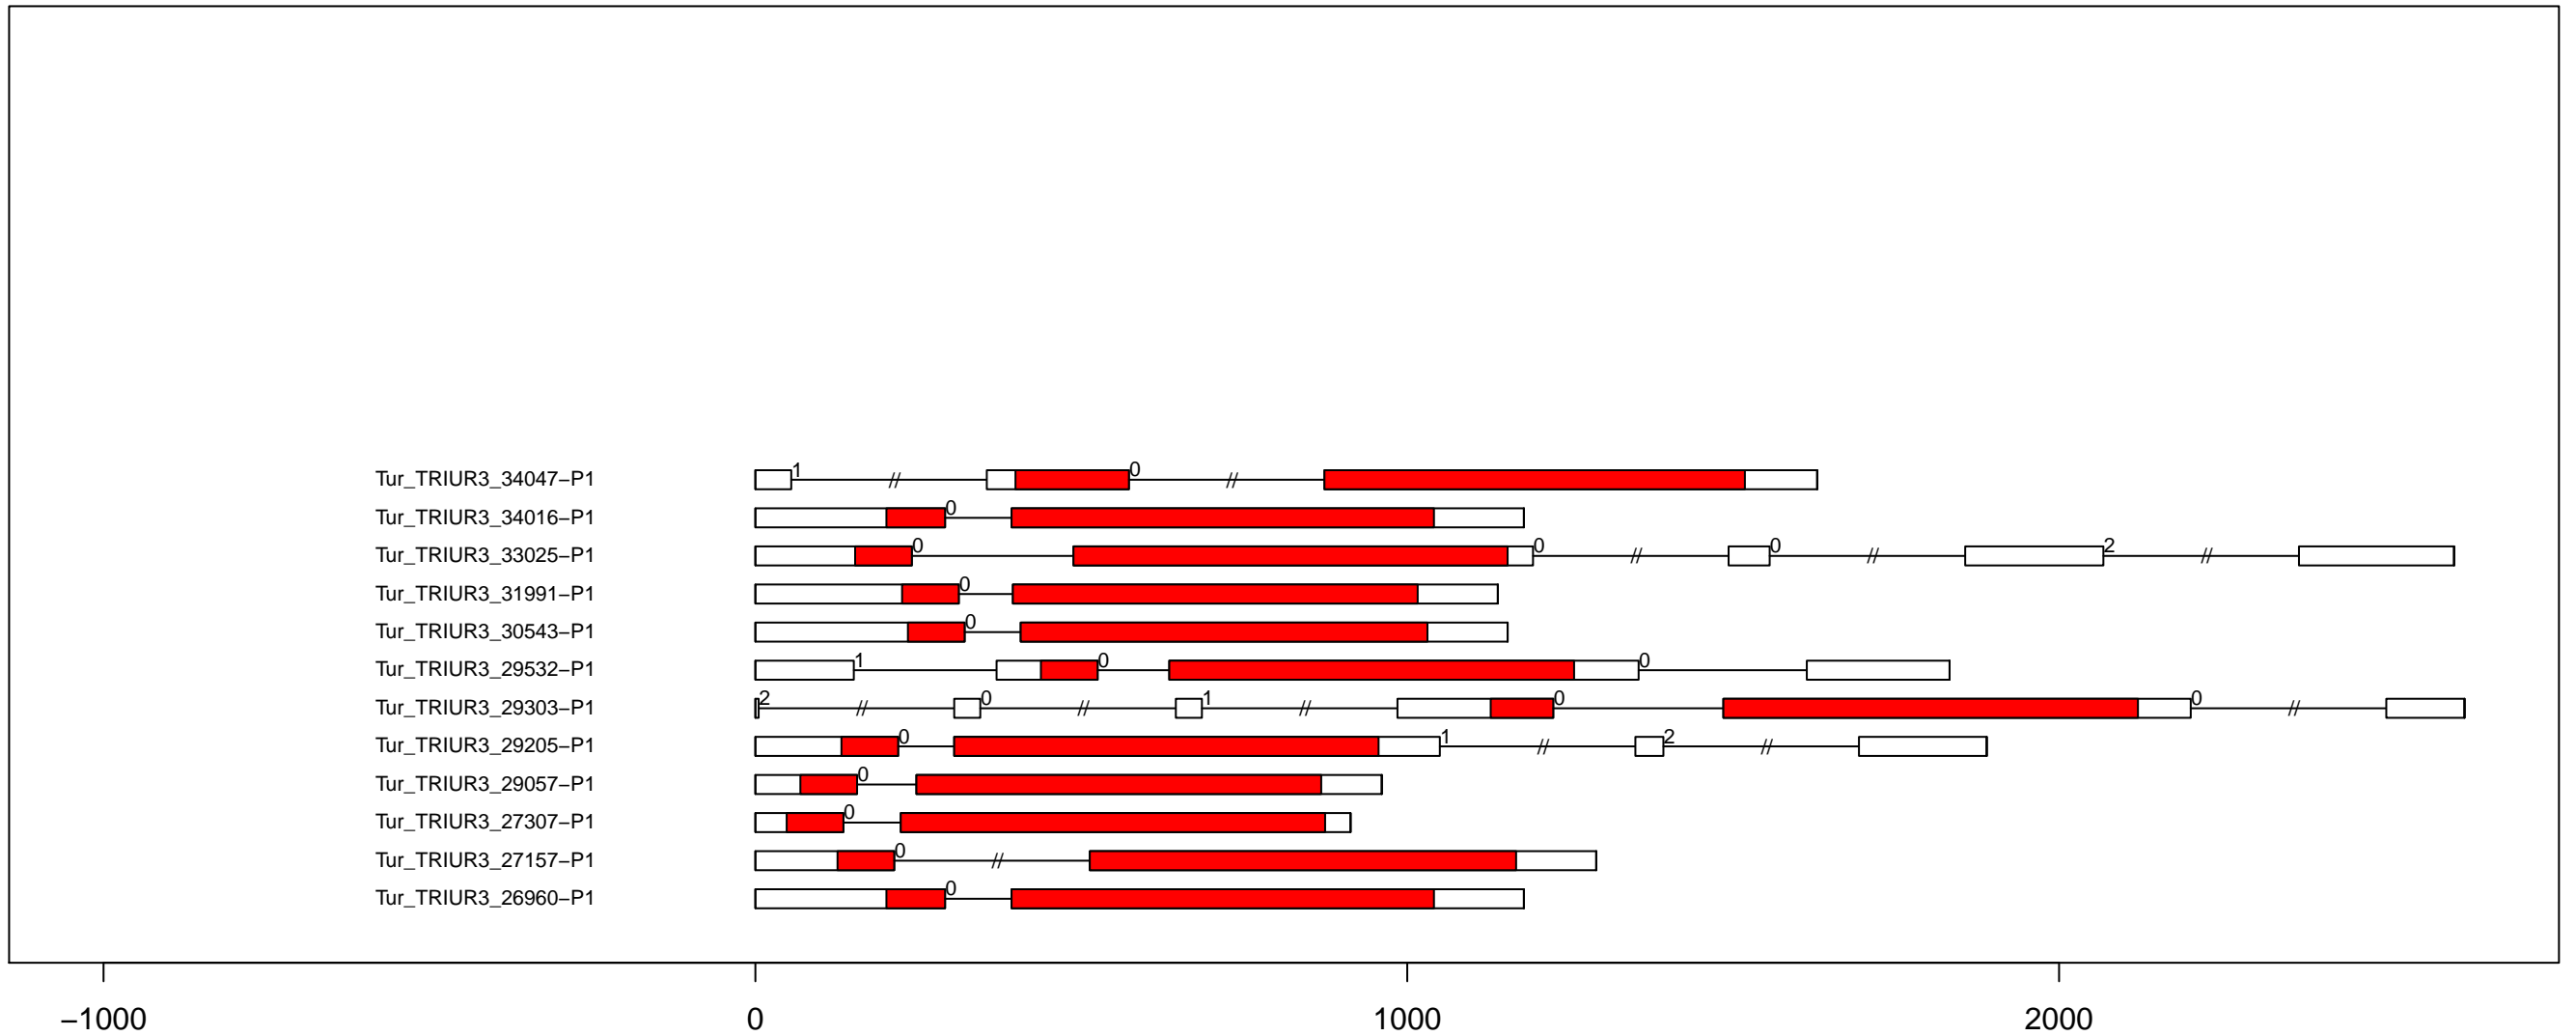

# T.ur class III peroxidase II subfamily exon-intron and prx domain diagram (all)

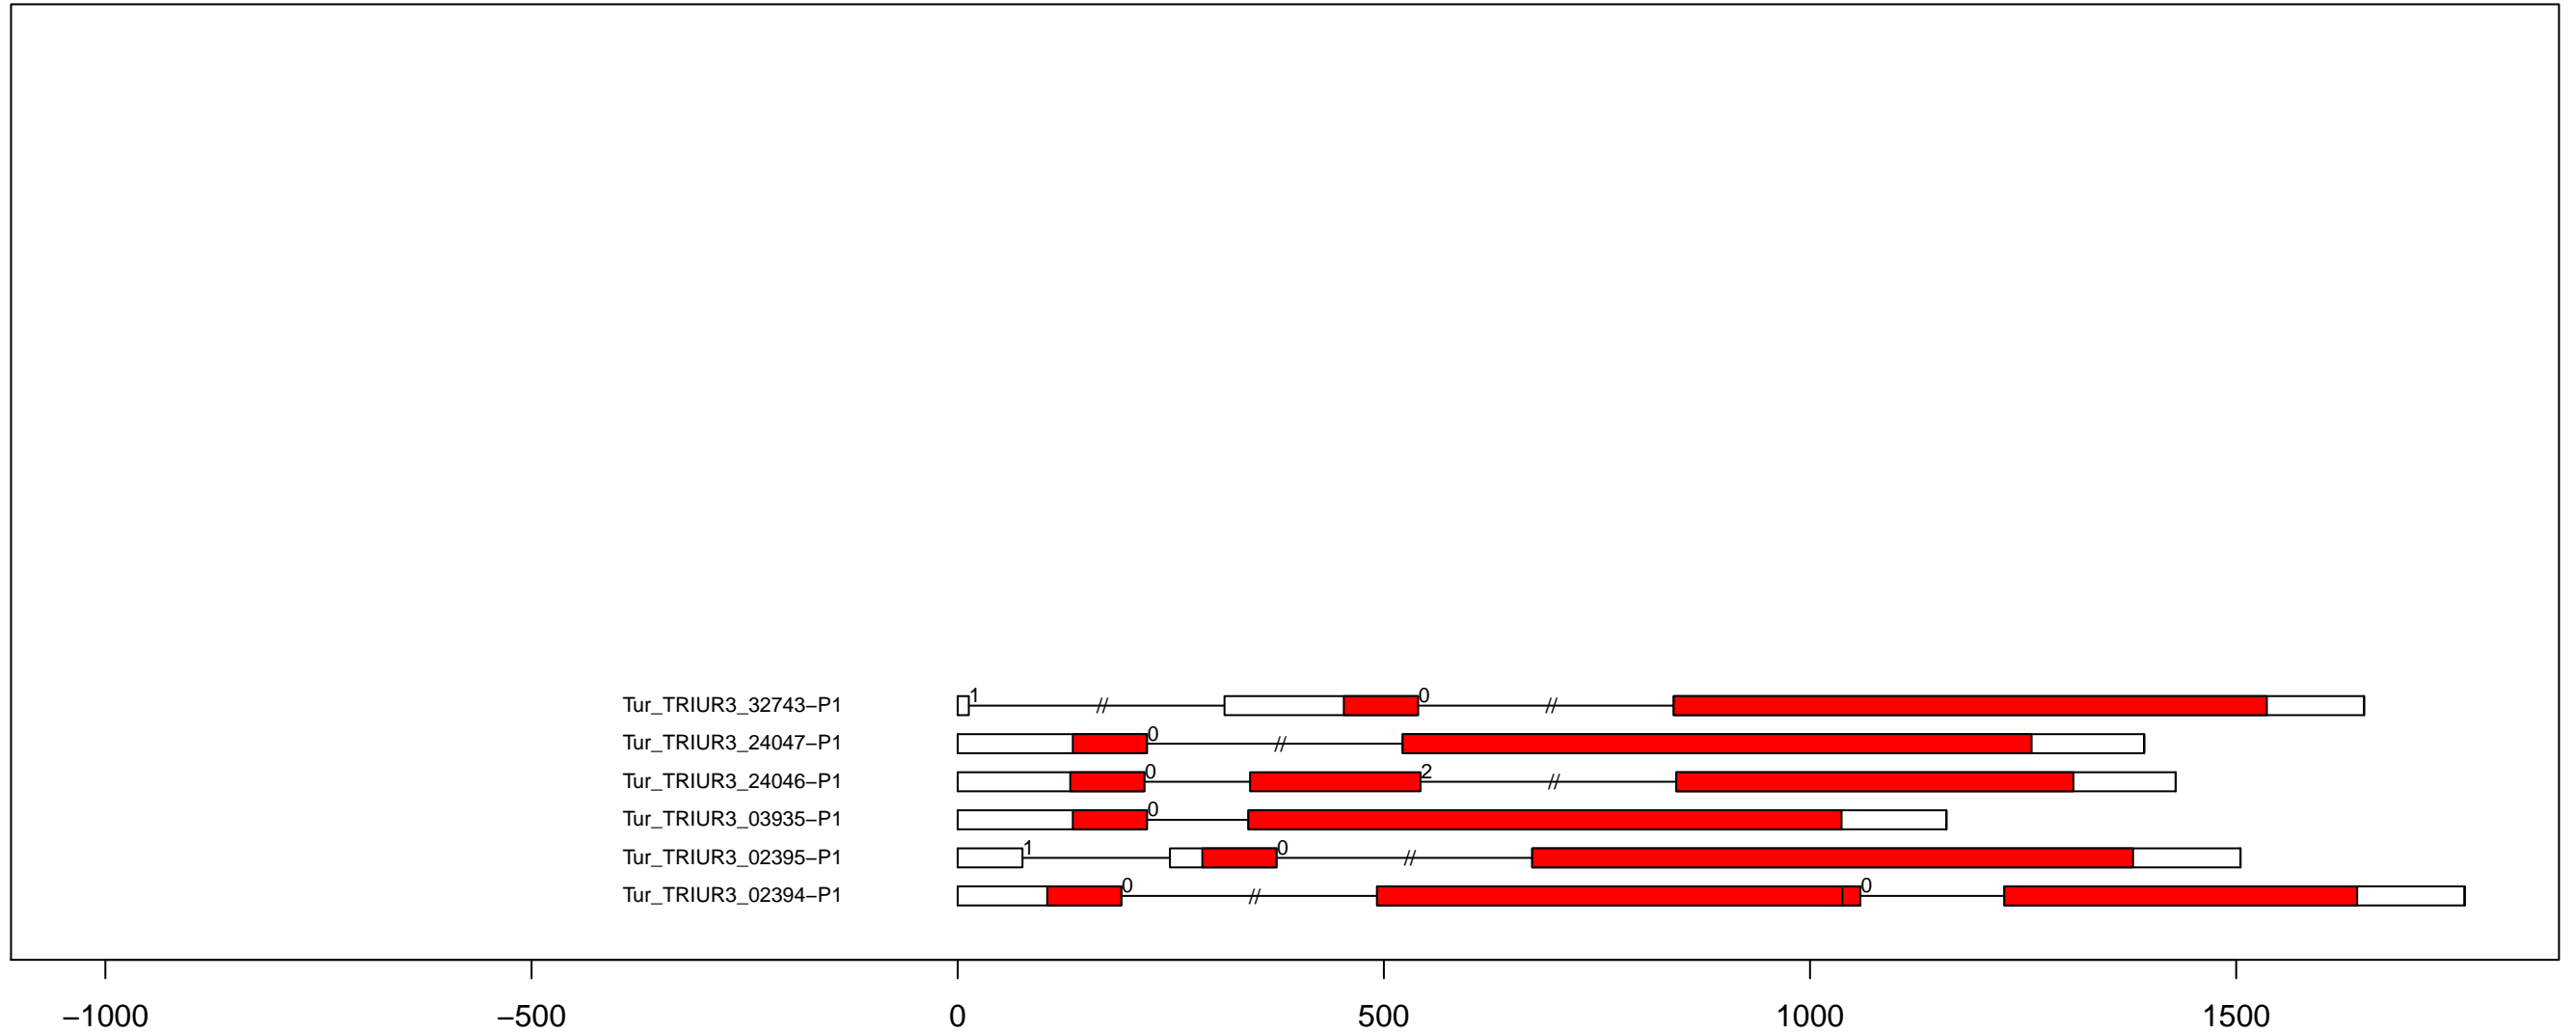



# T.ur class III peroxidase III subfamily exon-intron and prx domain diagram (all)

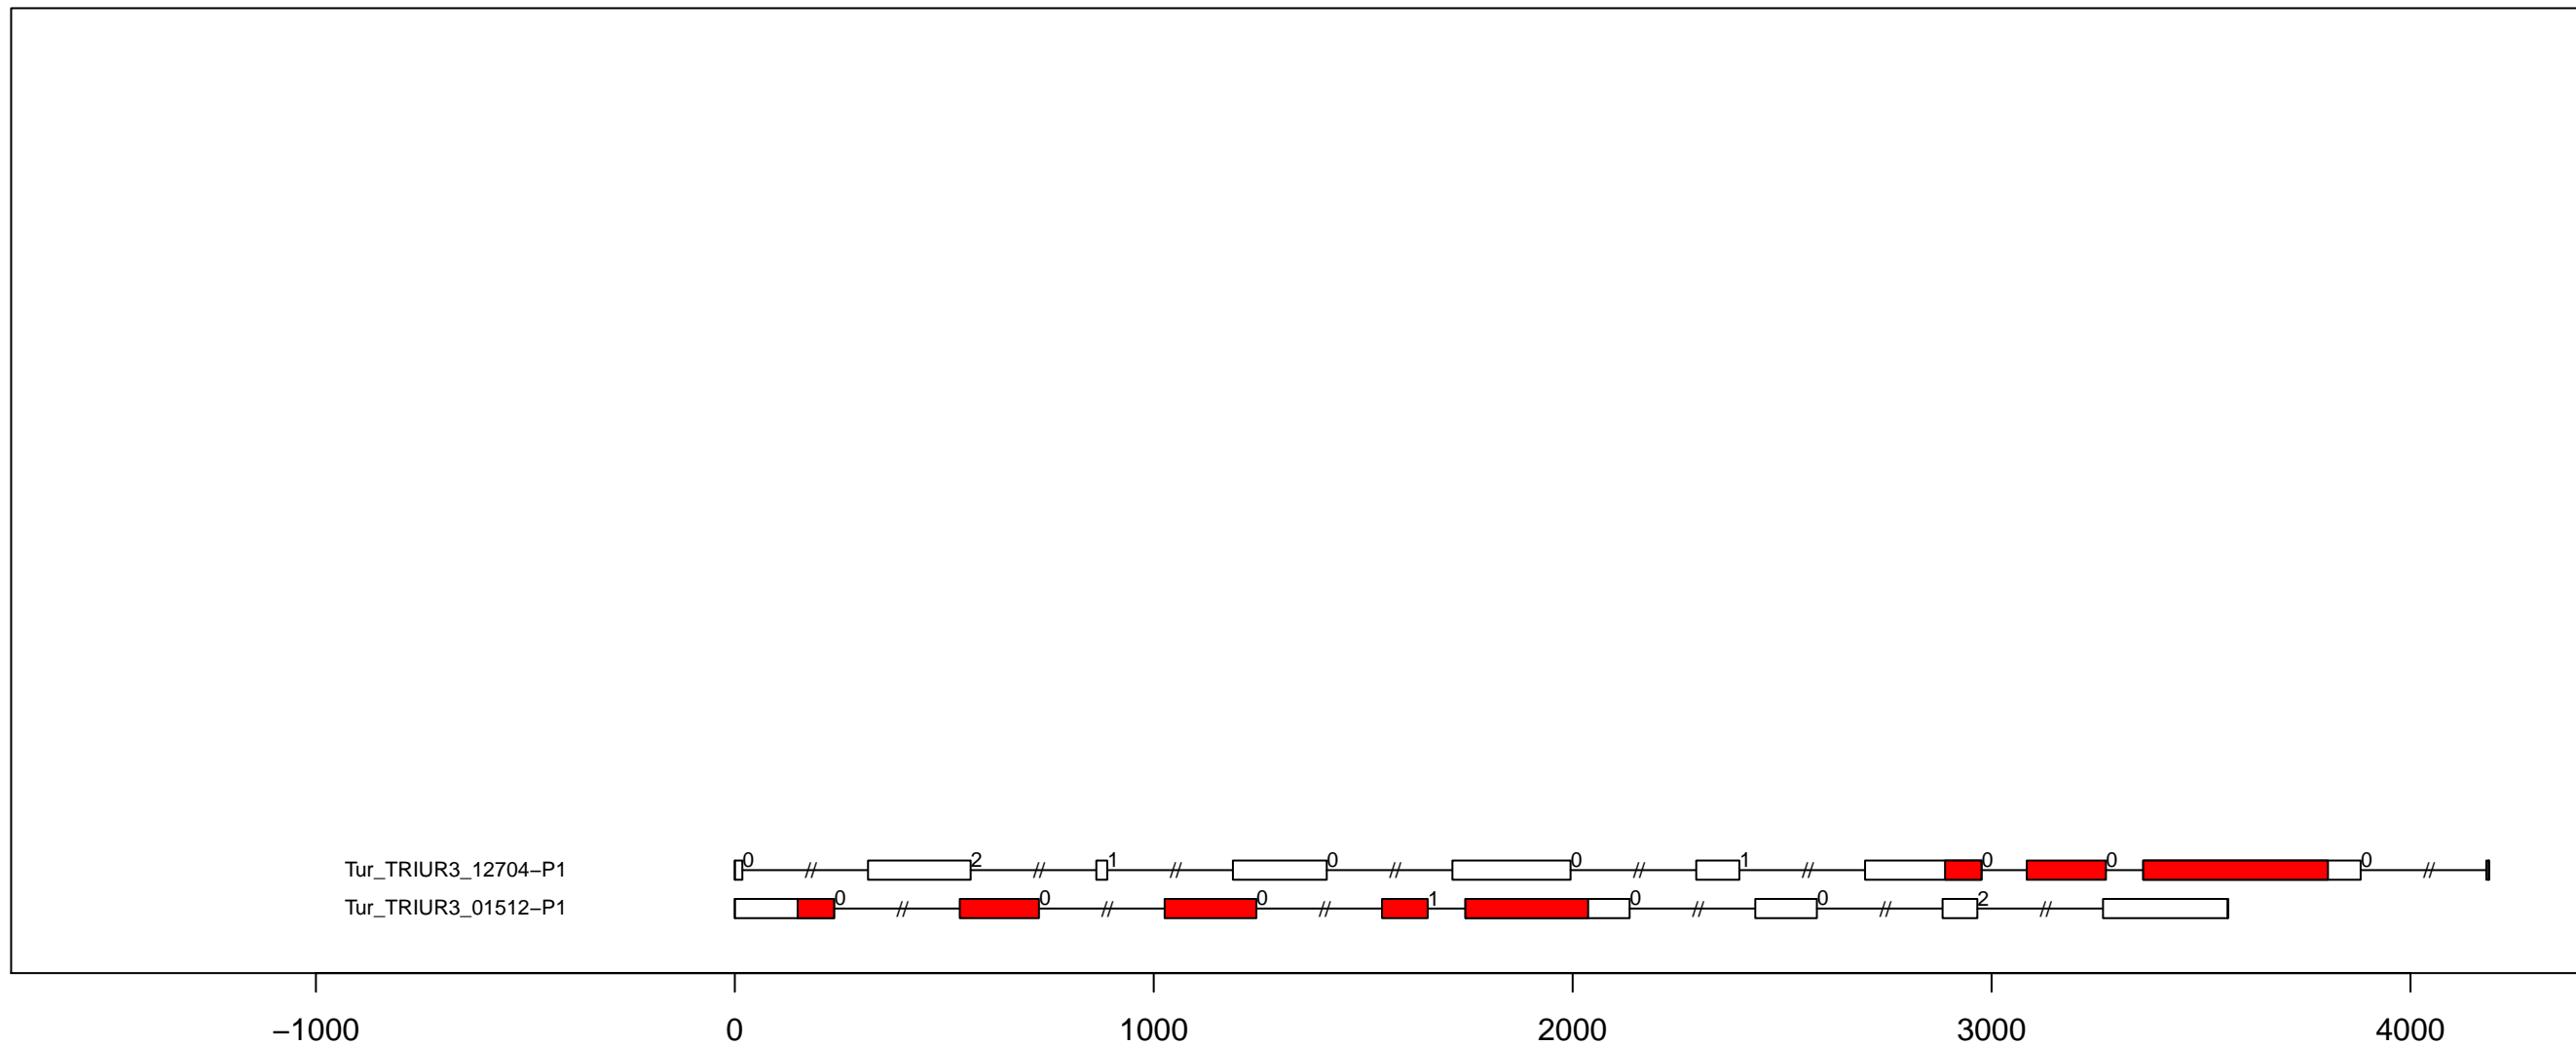

### T.ur class III peroxidase V subfamily exon-intron and prx domain diagram (all)

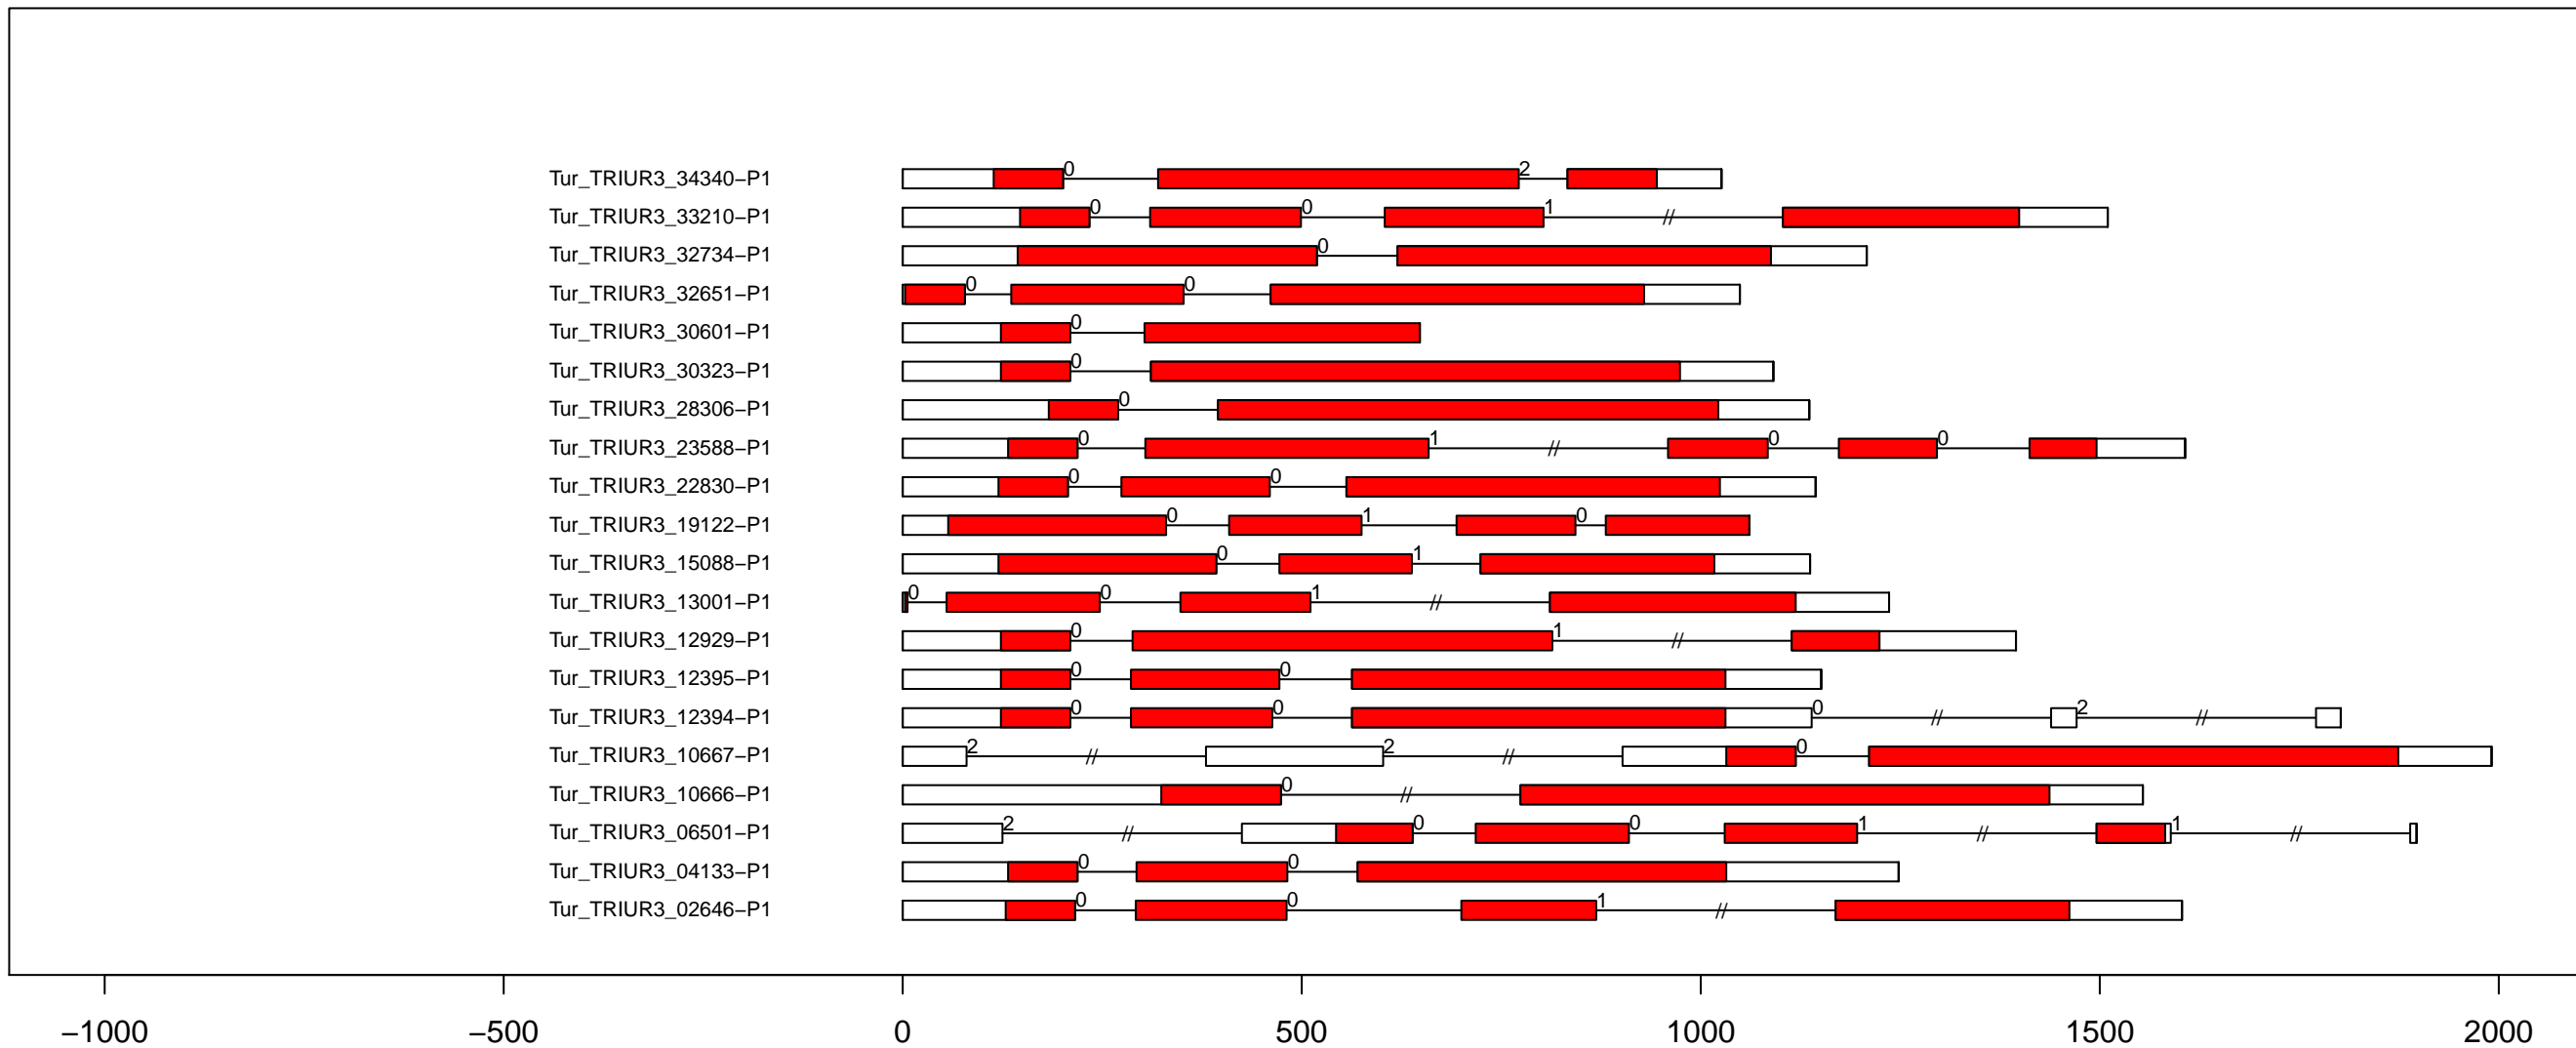

### T.ur class III peroxidase VI subfamily exon-intron and prx domain diagram (all)

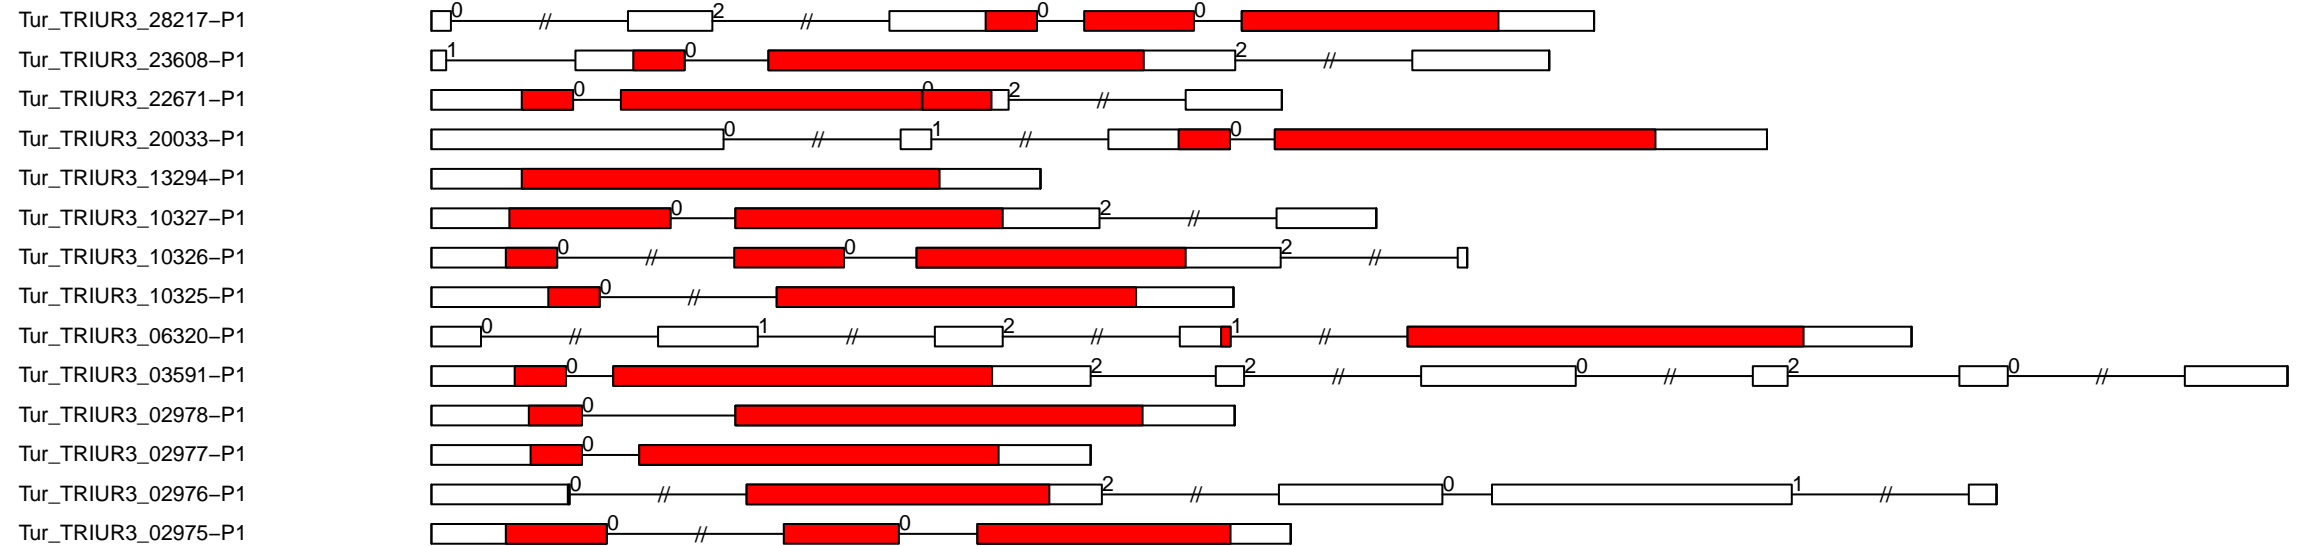

### T.ur class III peroxidase VII subfamily exon-intron and prx domain diagram (all)

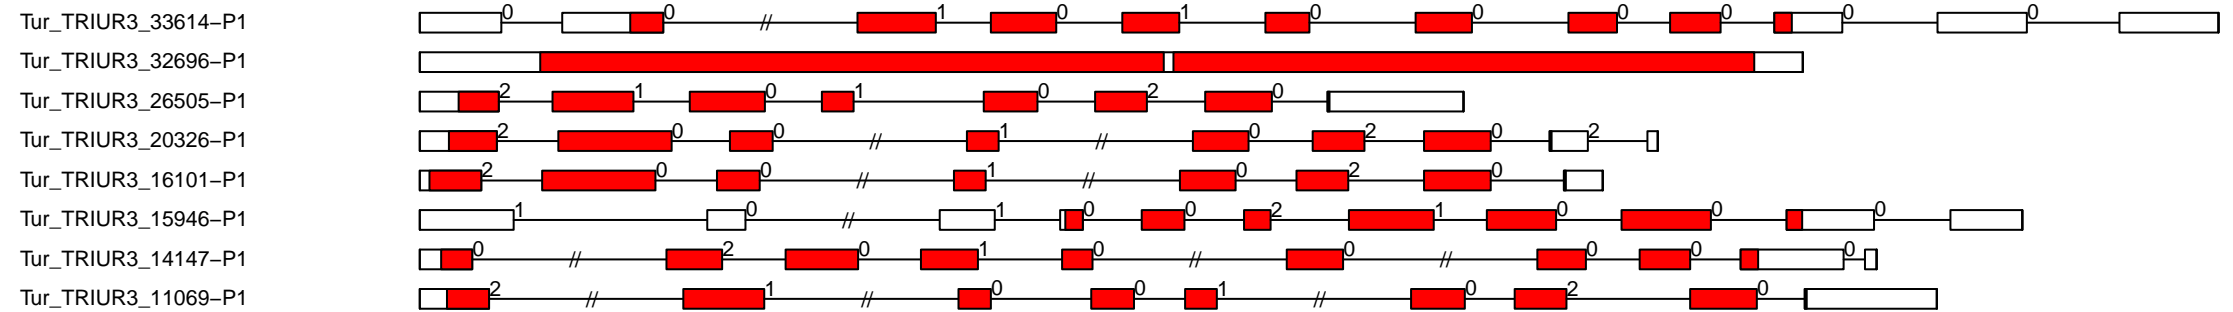

-1000

0

1000

2000



# T.ur class III peroxidase X subfamily exon-intron and prx domain diagram (all)

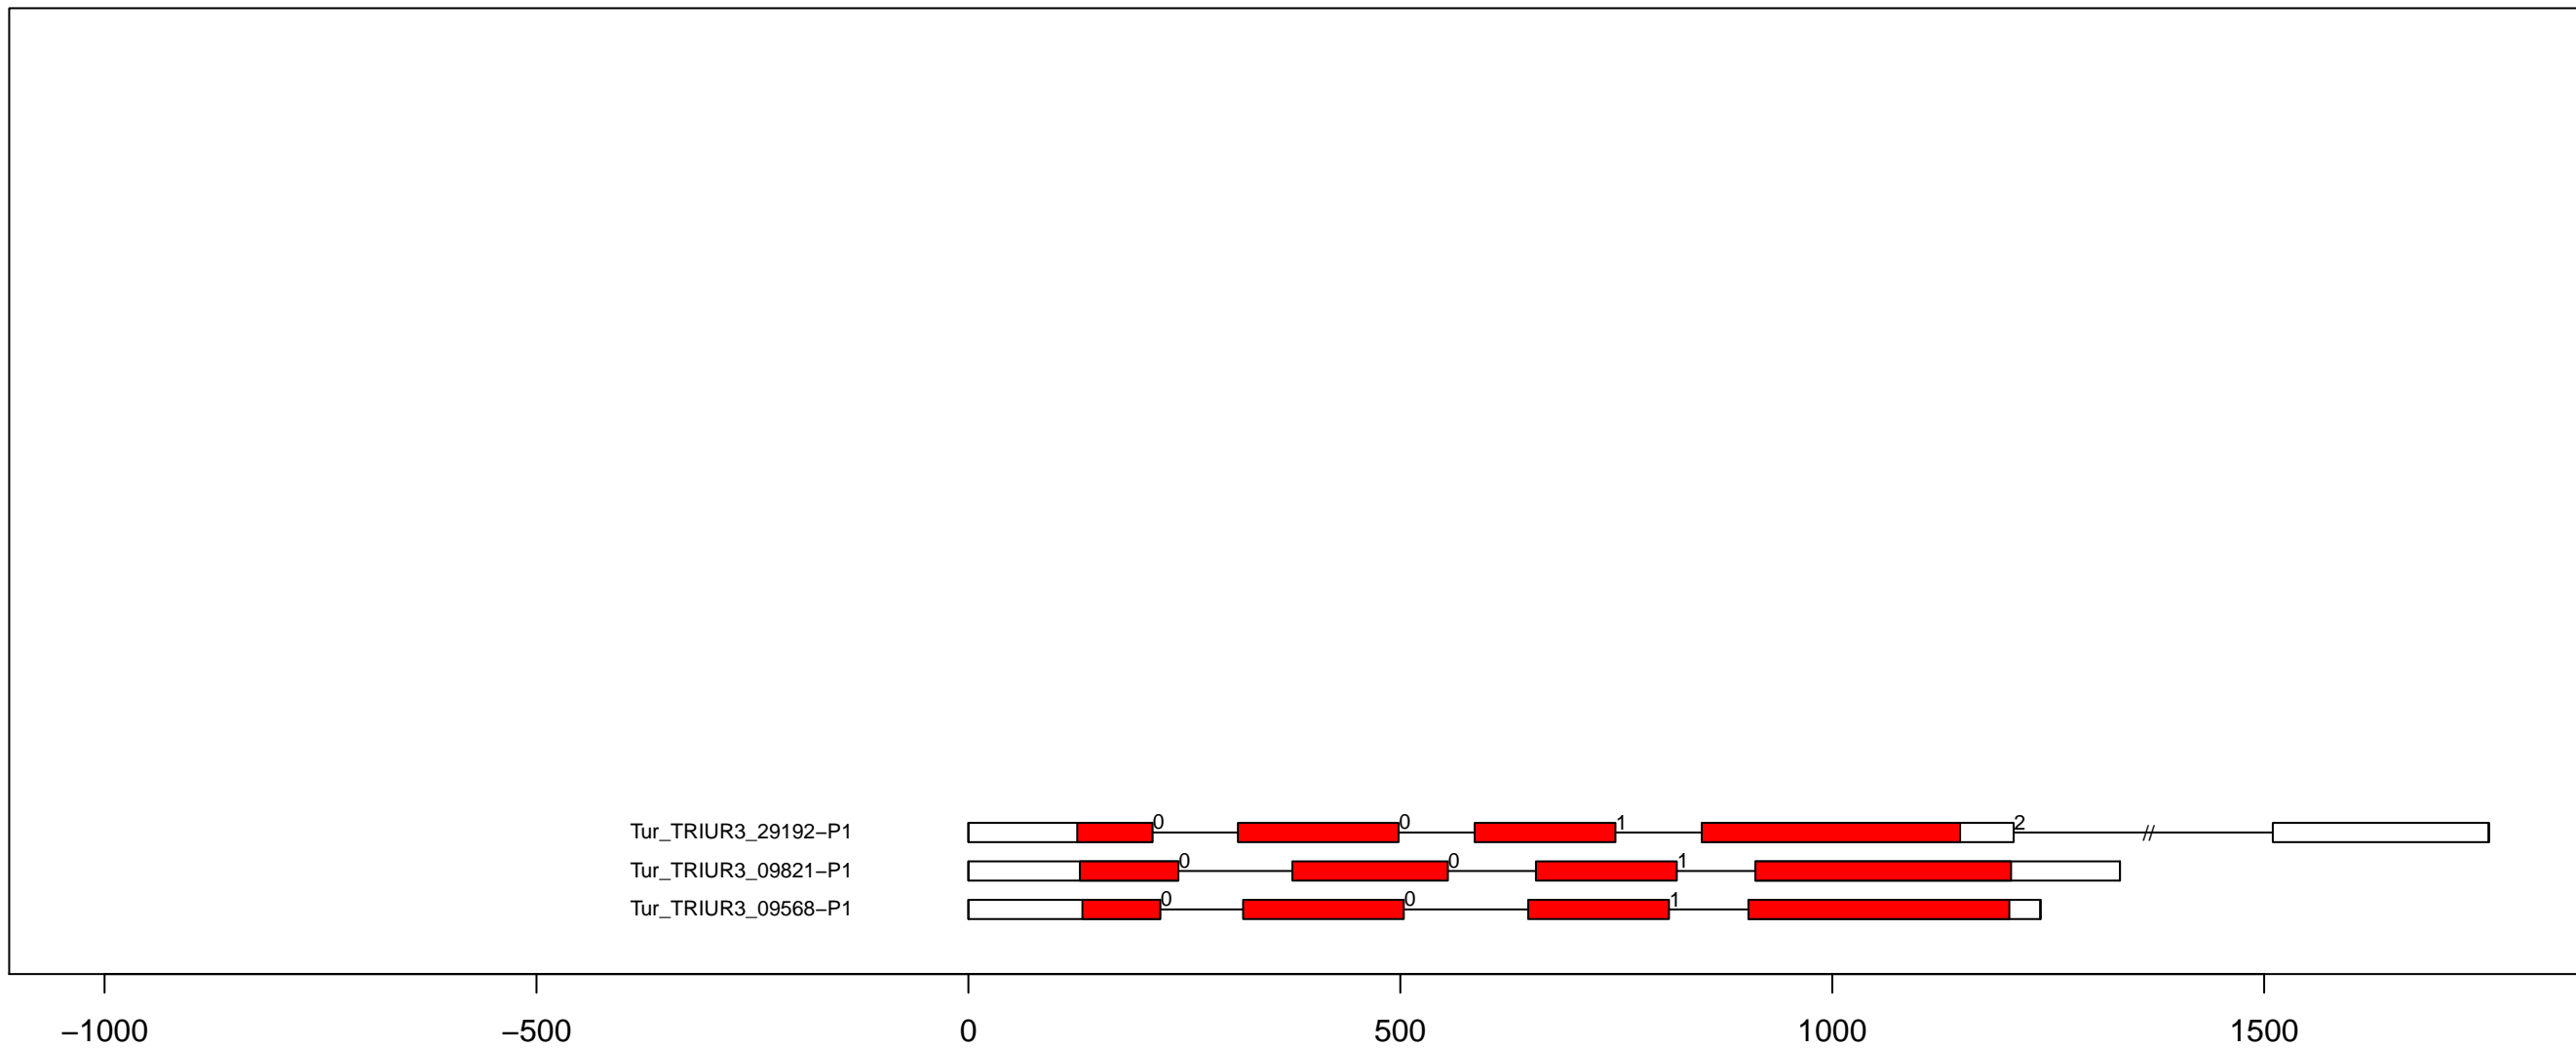

# T.ur class III peroxidase XI subfamily exon-intron and prx domain diagram (all)

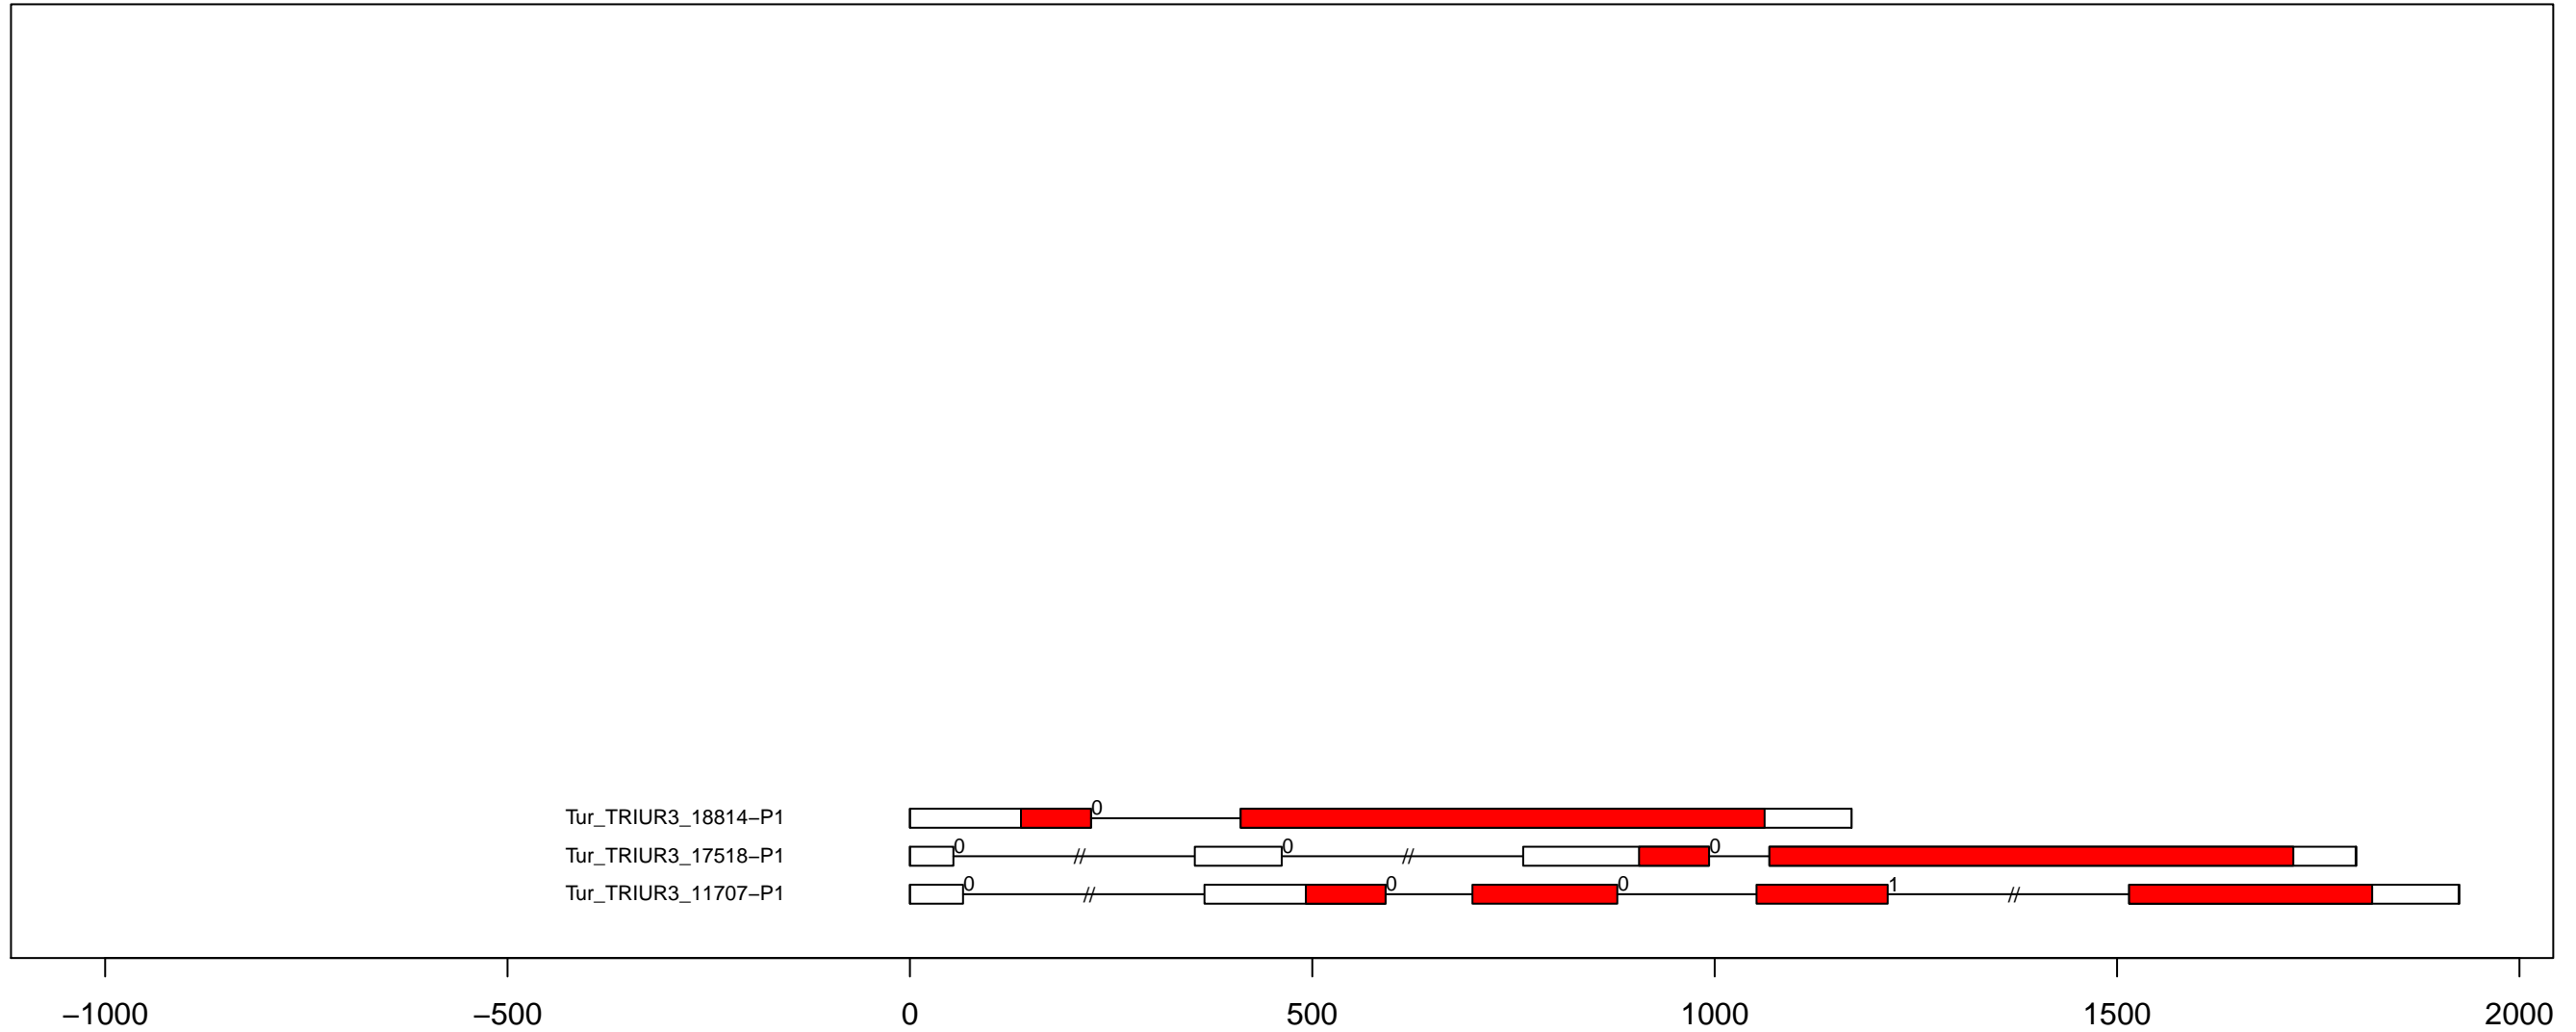





# T.ur class III peroxidase XIII subfamily exon-intron and prx domain diagram (all)

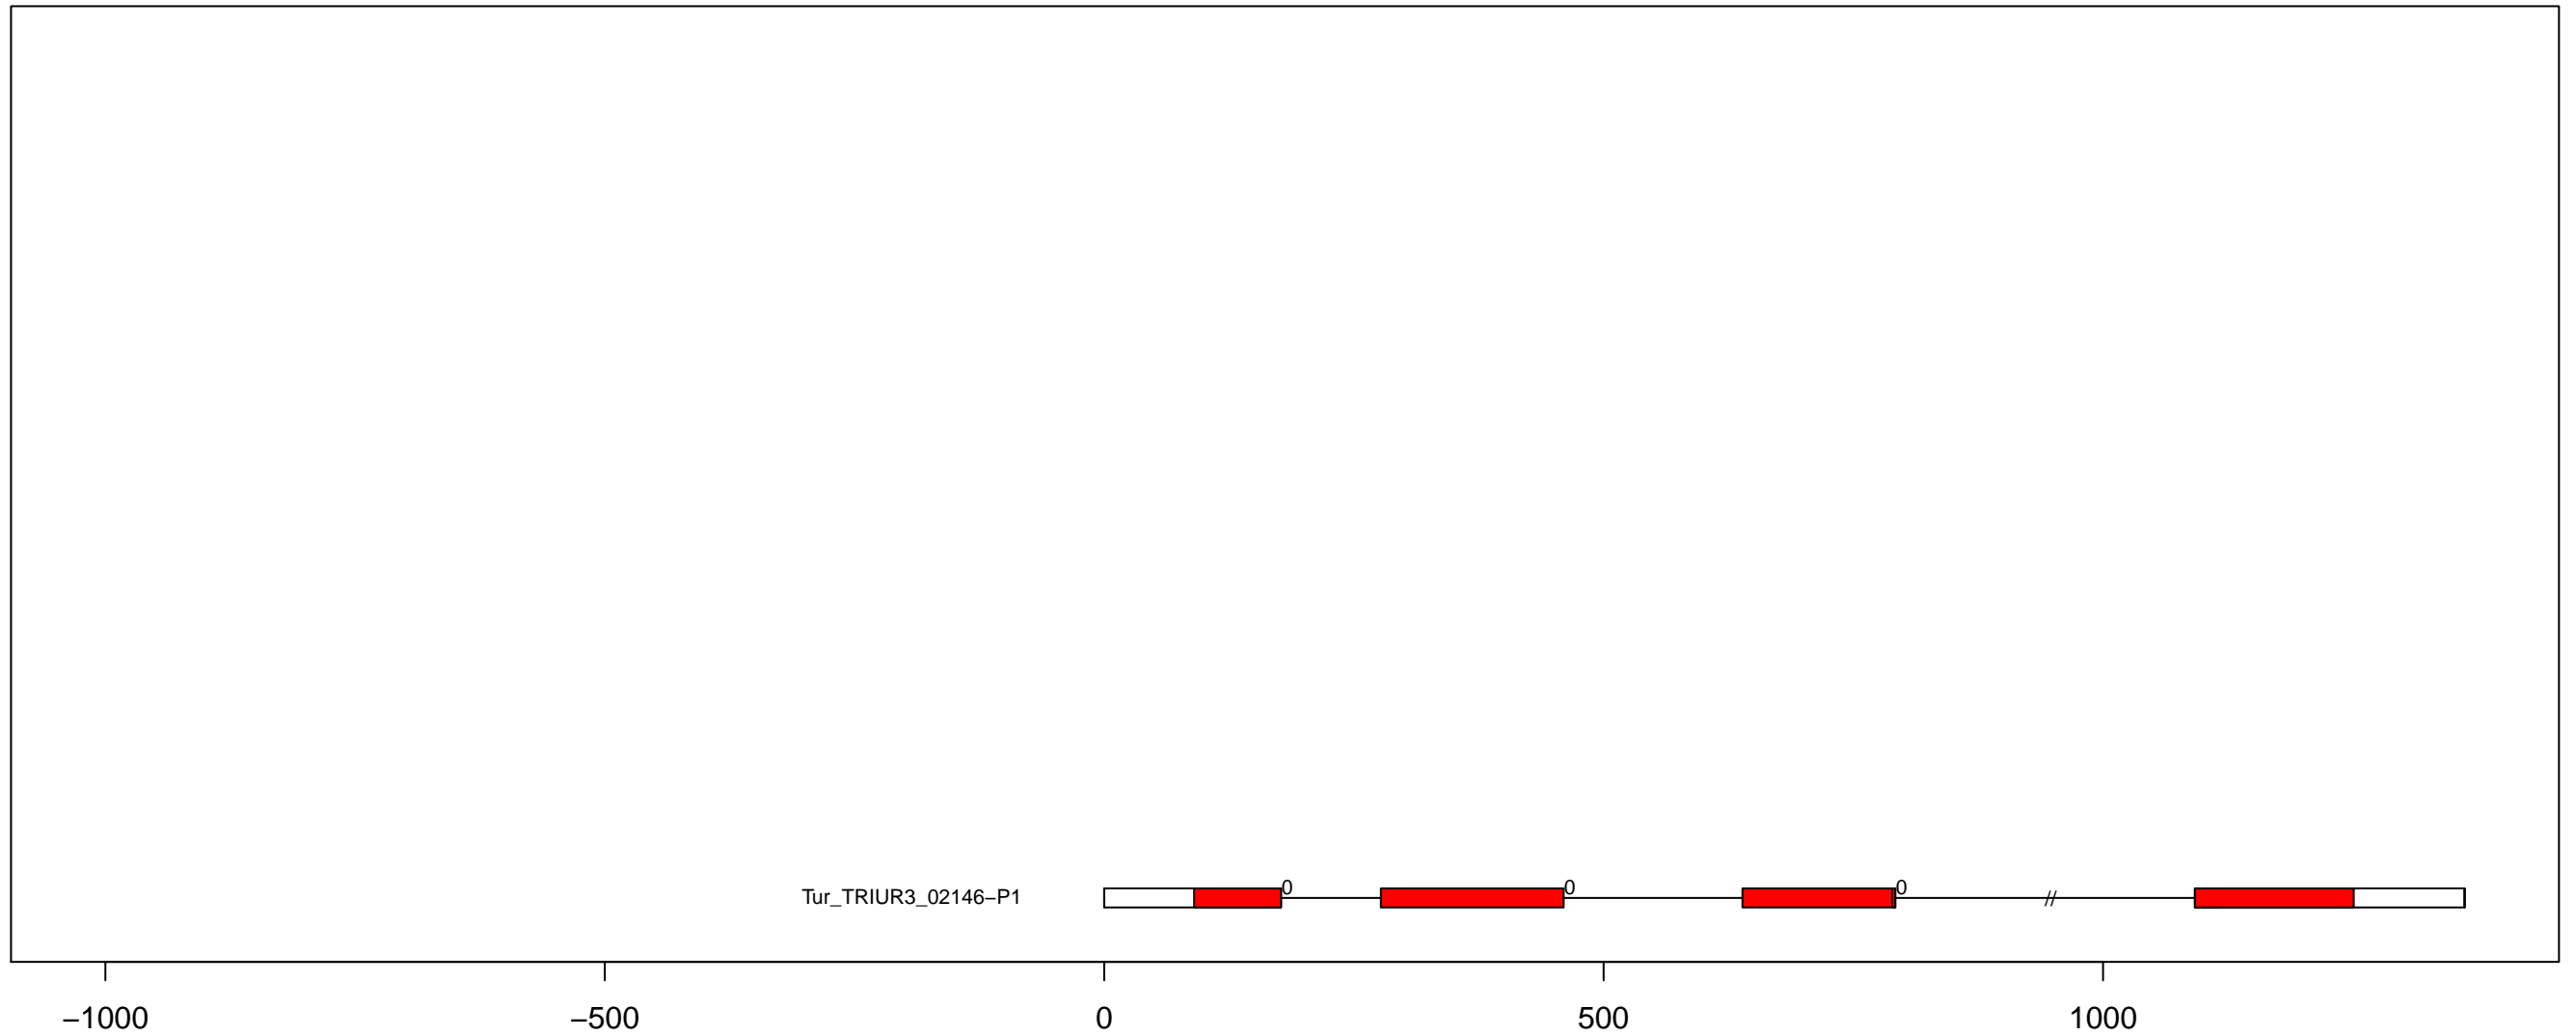

# T.ur class III peroxidase XIV subfamily exon-intron and prx domain diagram (all)

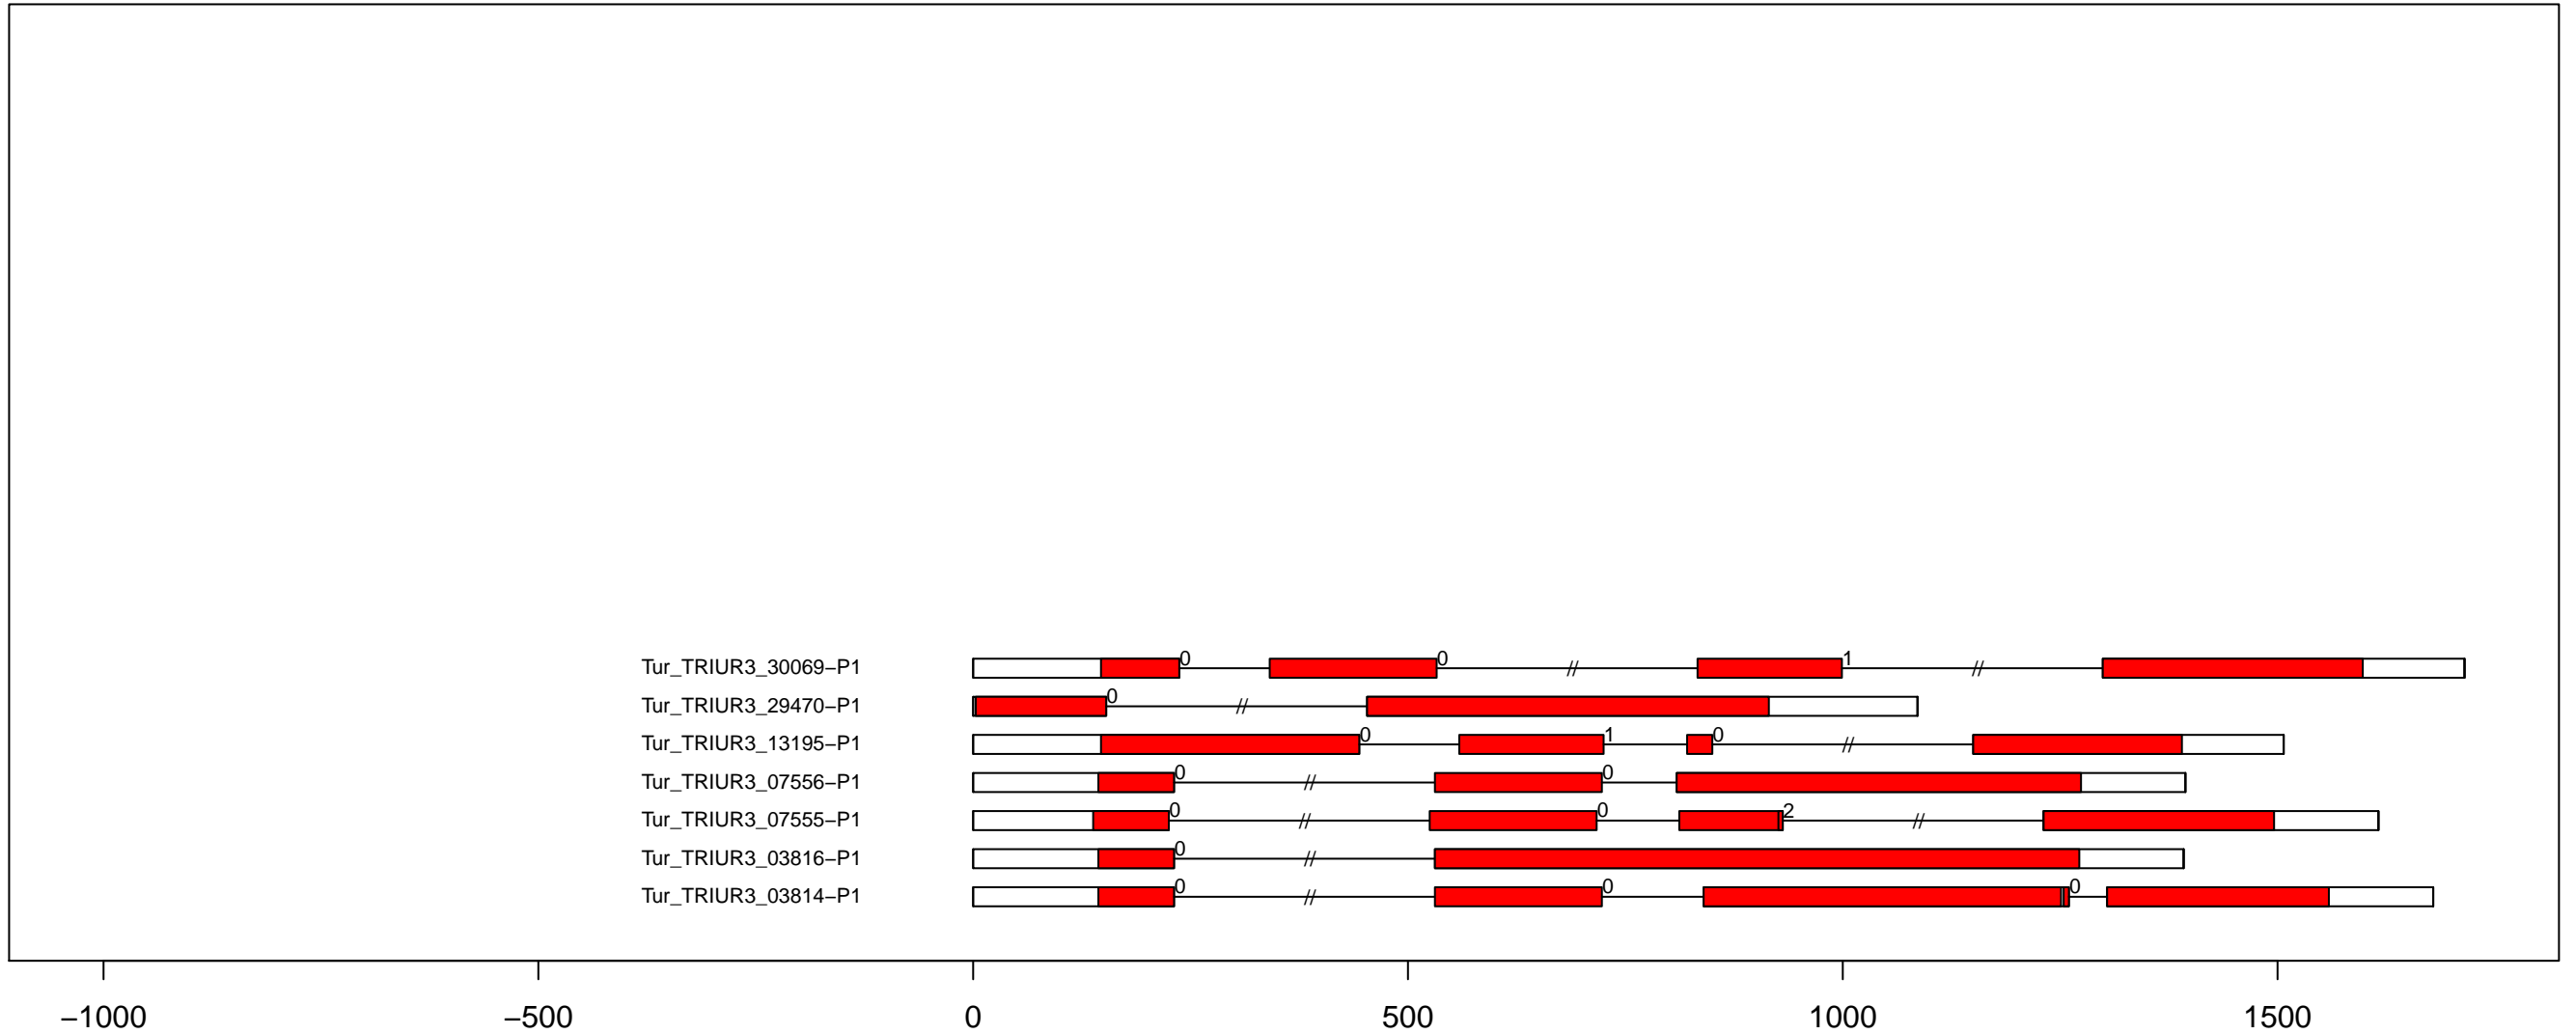

# T.ur class III peroxidase XV subfamily exon-intron and prx domain diagram (all)

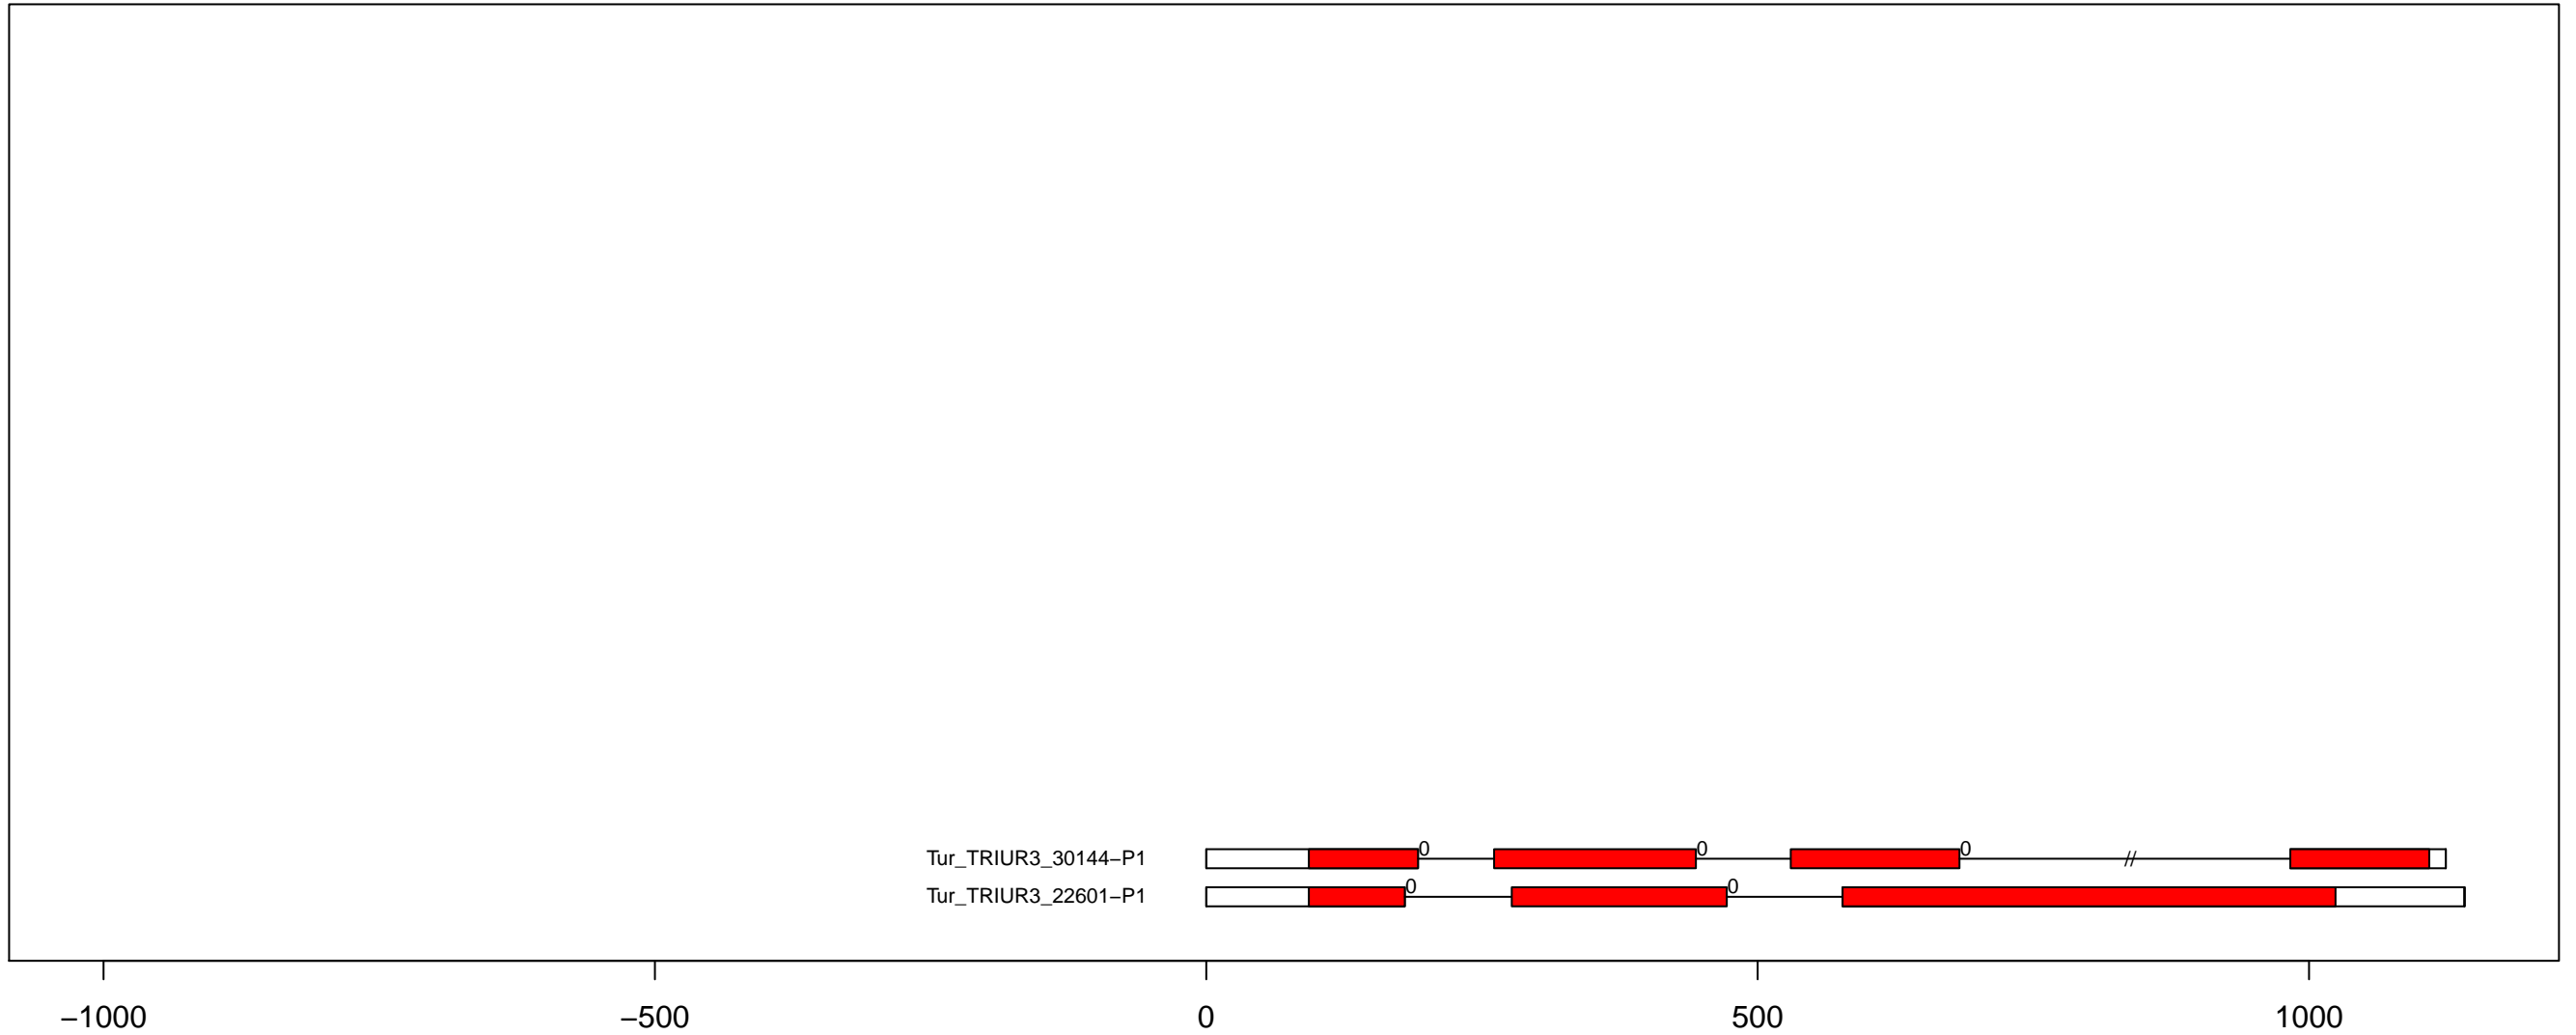



### T.ur class III peroxidase XVII subfamily exon-intron and prx domain diagram (all)

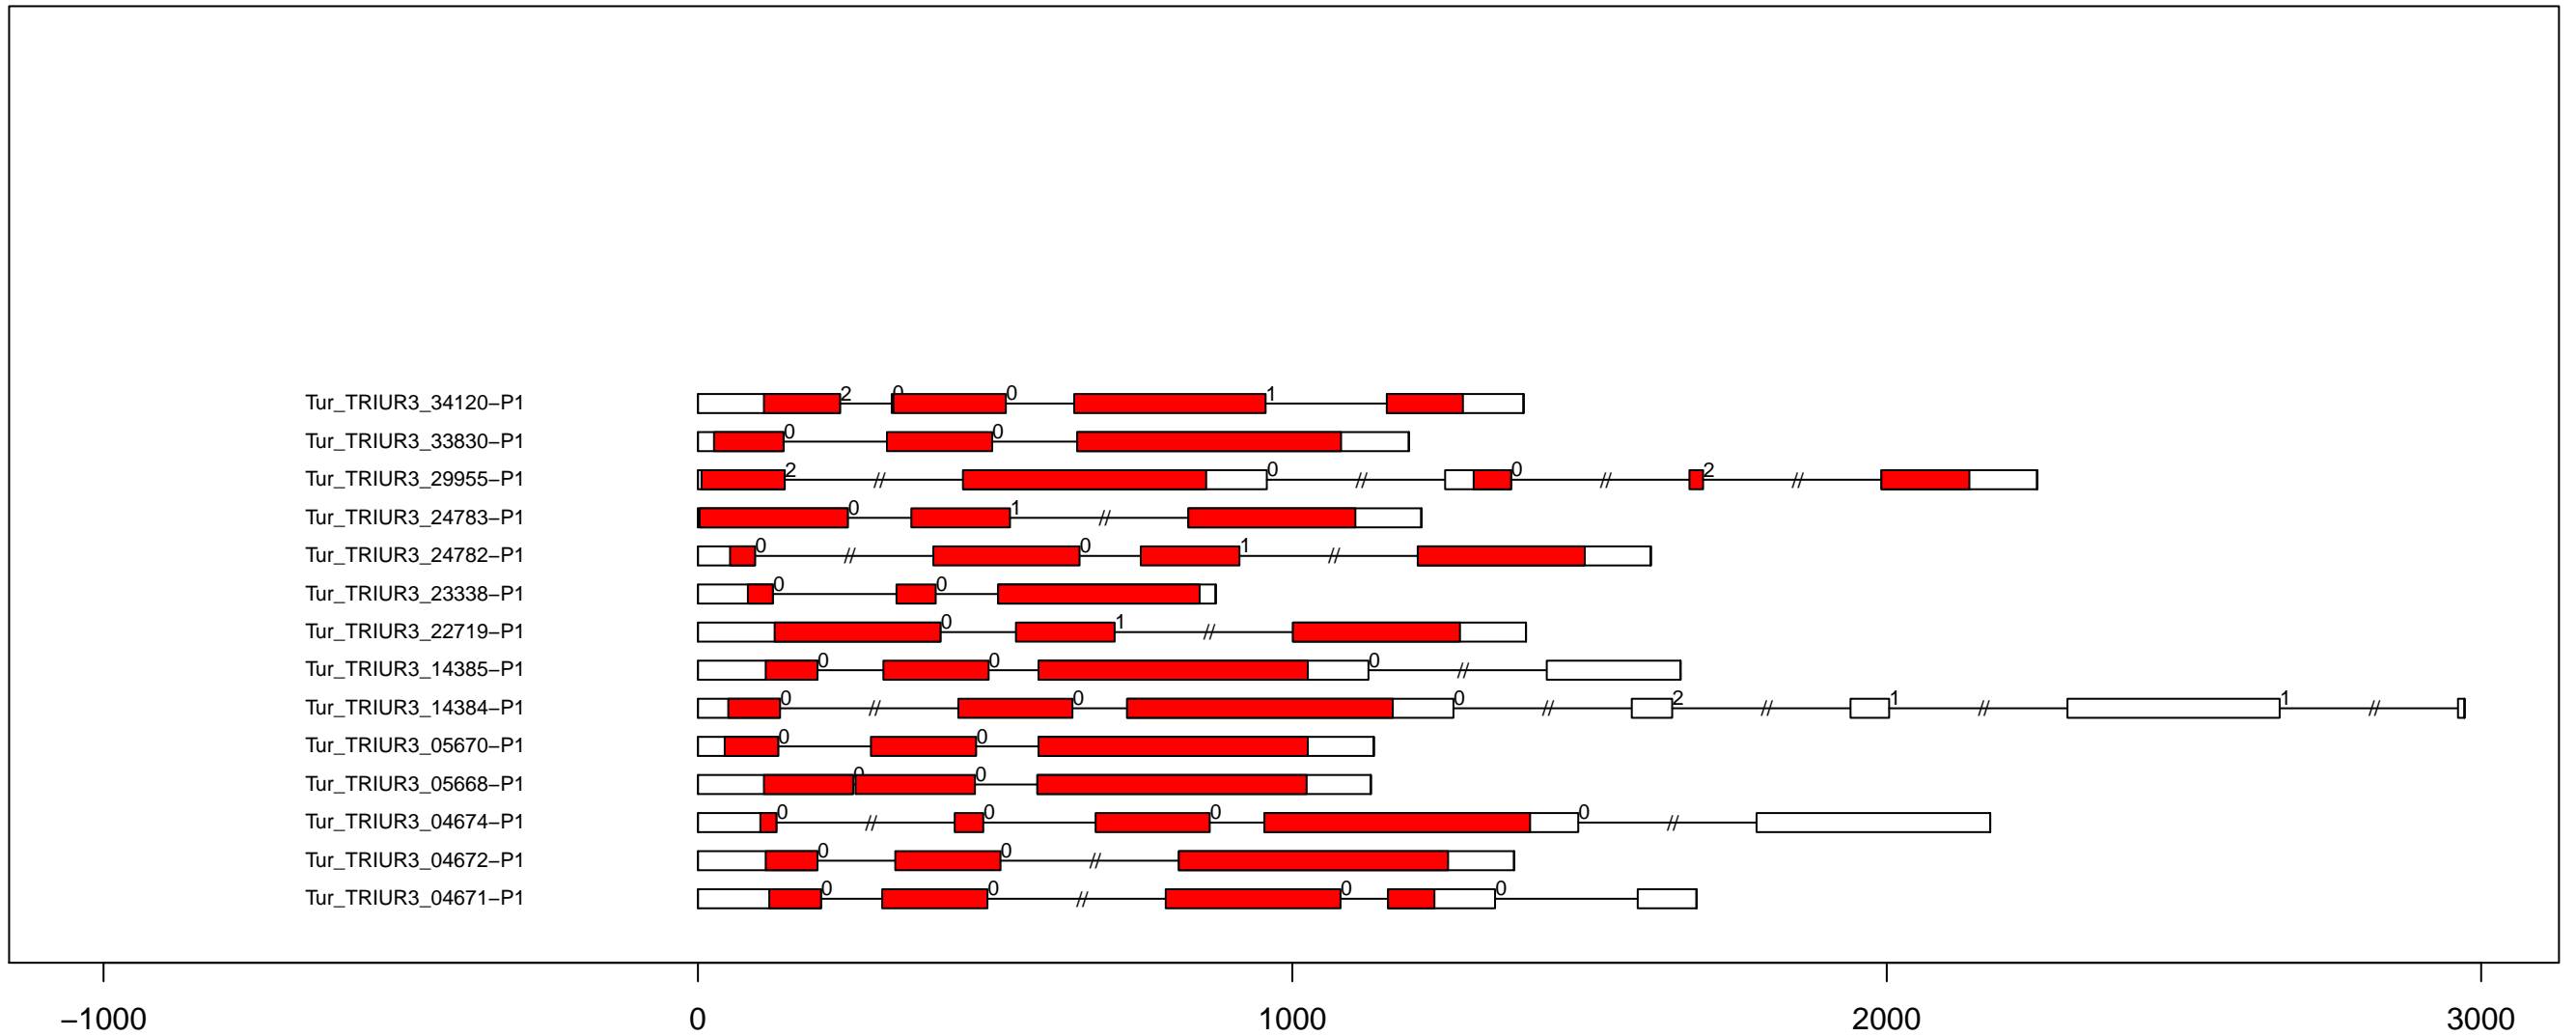

# T.ur class III peroxidase XVIII subfamily exon-intron and prx domain diagram (all)

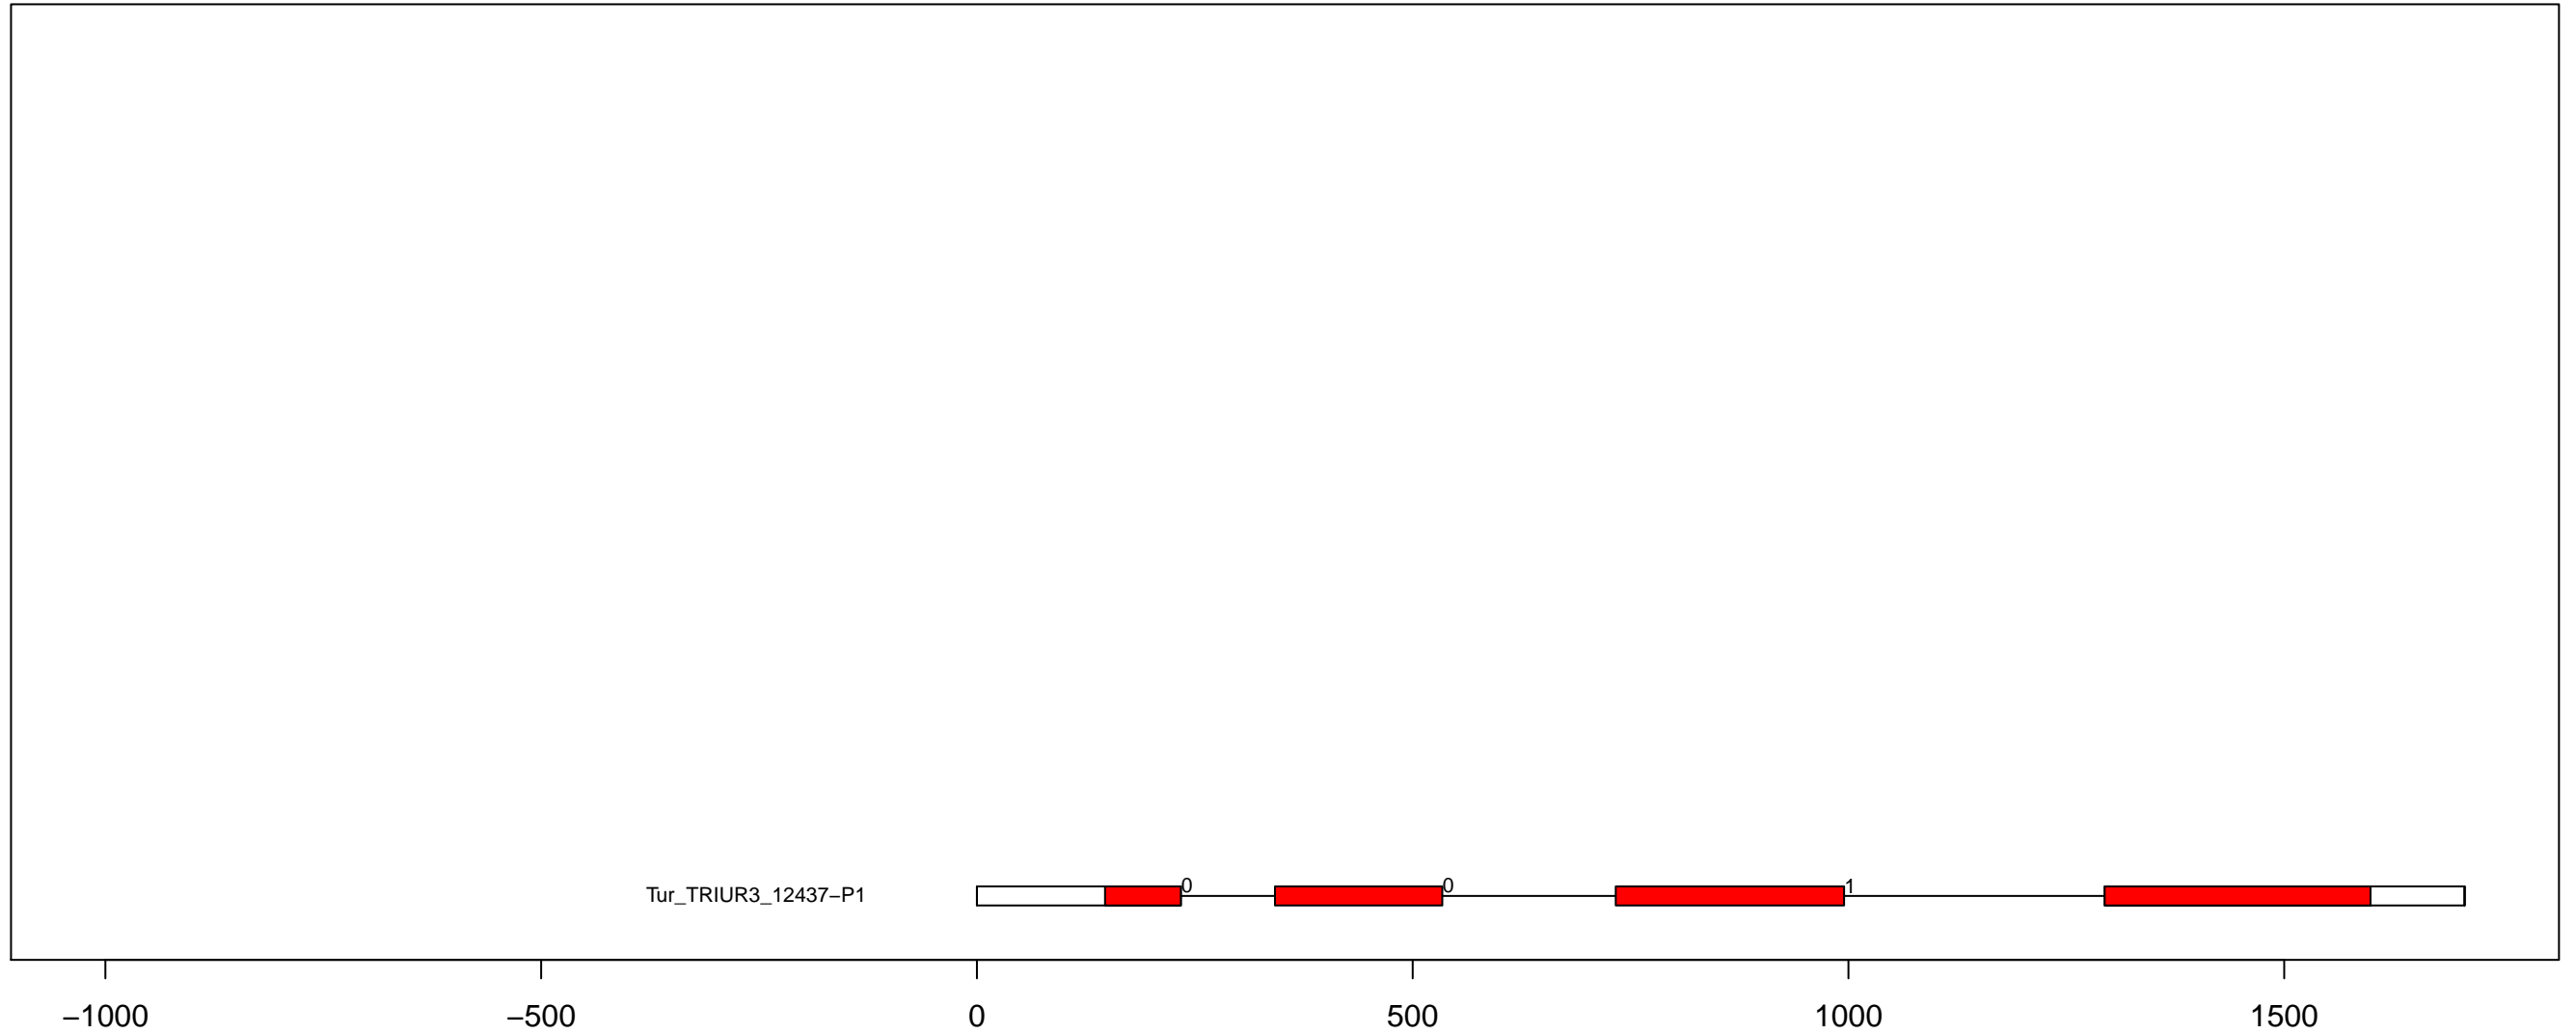

# T.ur class III peroxidase unclar\_classifications subfamily exon-intron and prx domain diagram (all)

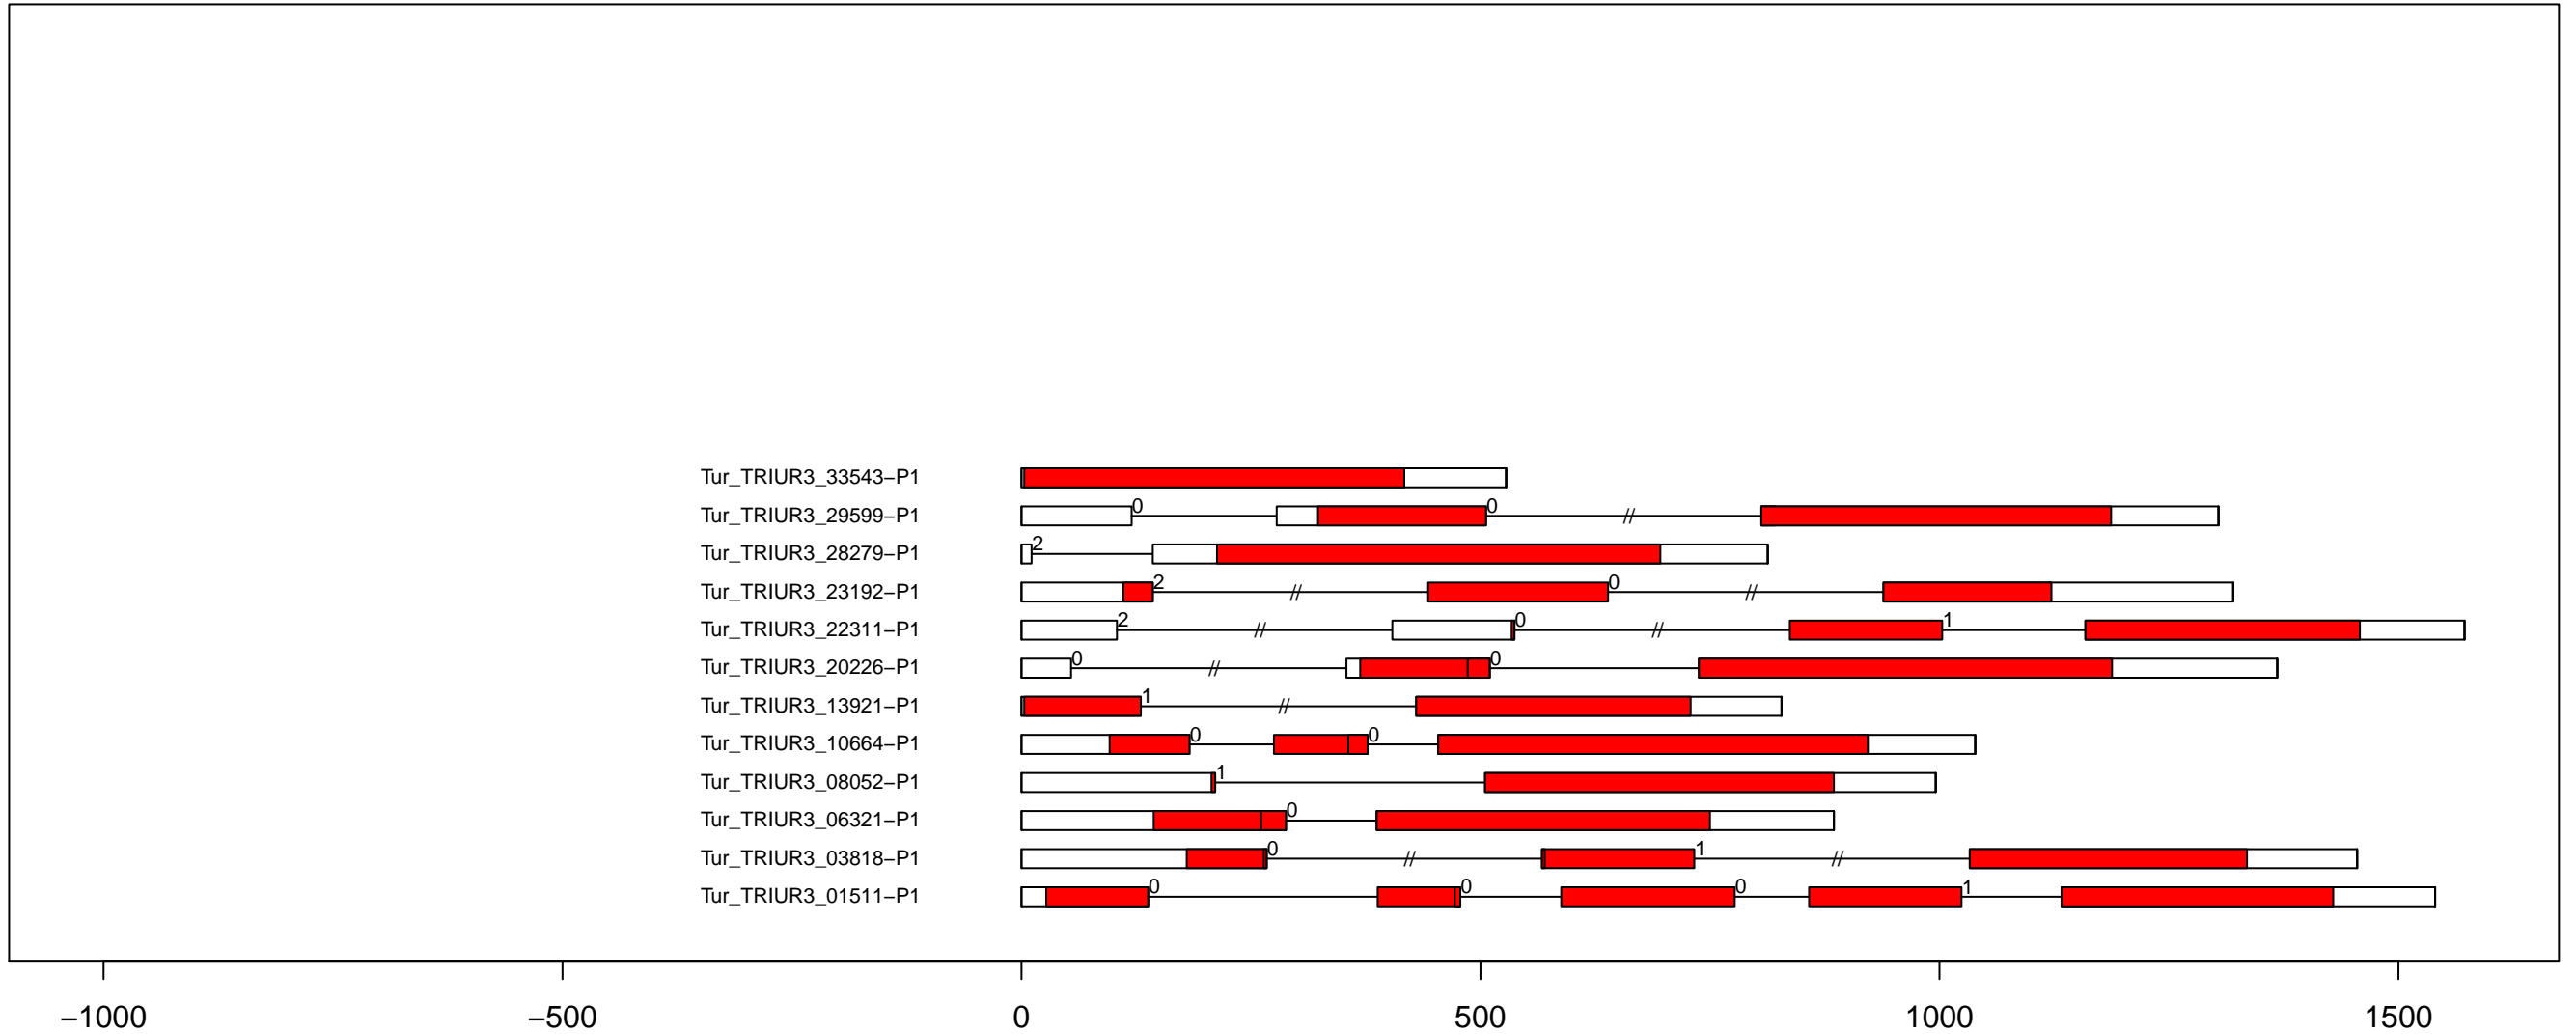

### A.ta class III peroxidase I subfamily exon-intron and prx domain diagram (part 1)

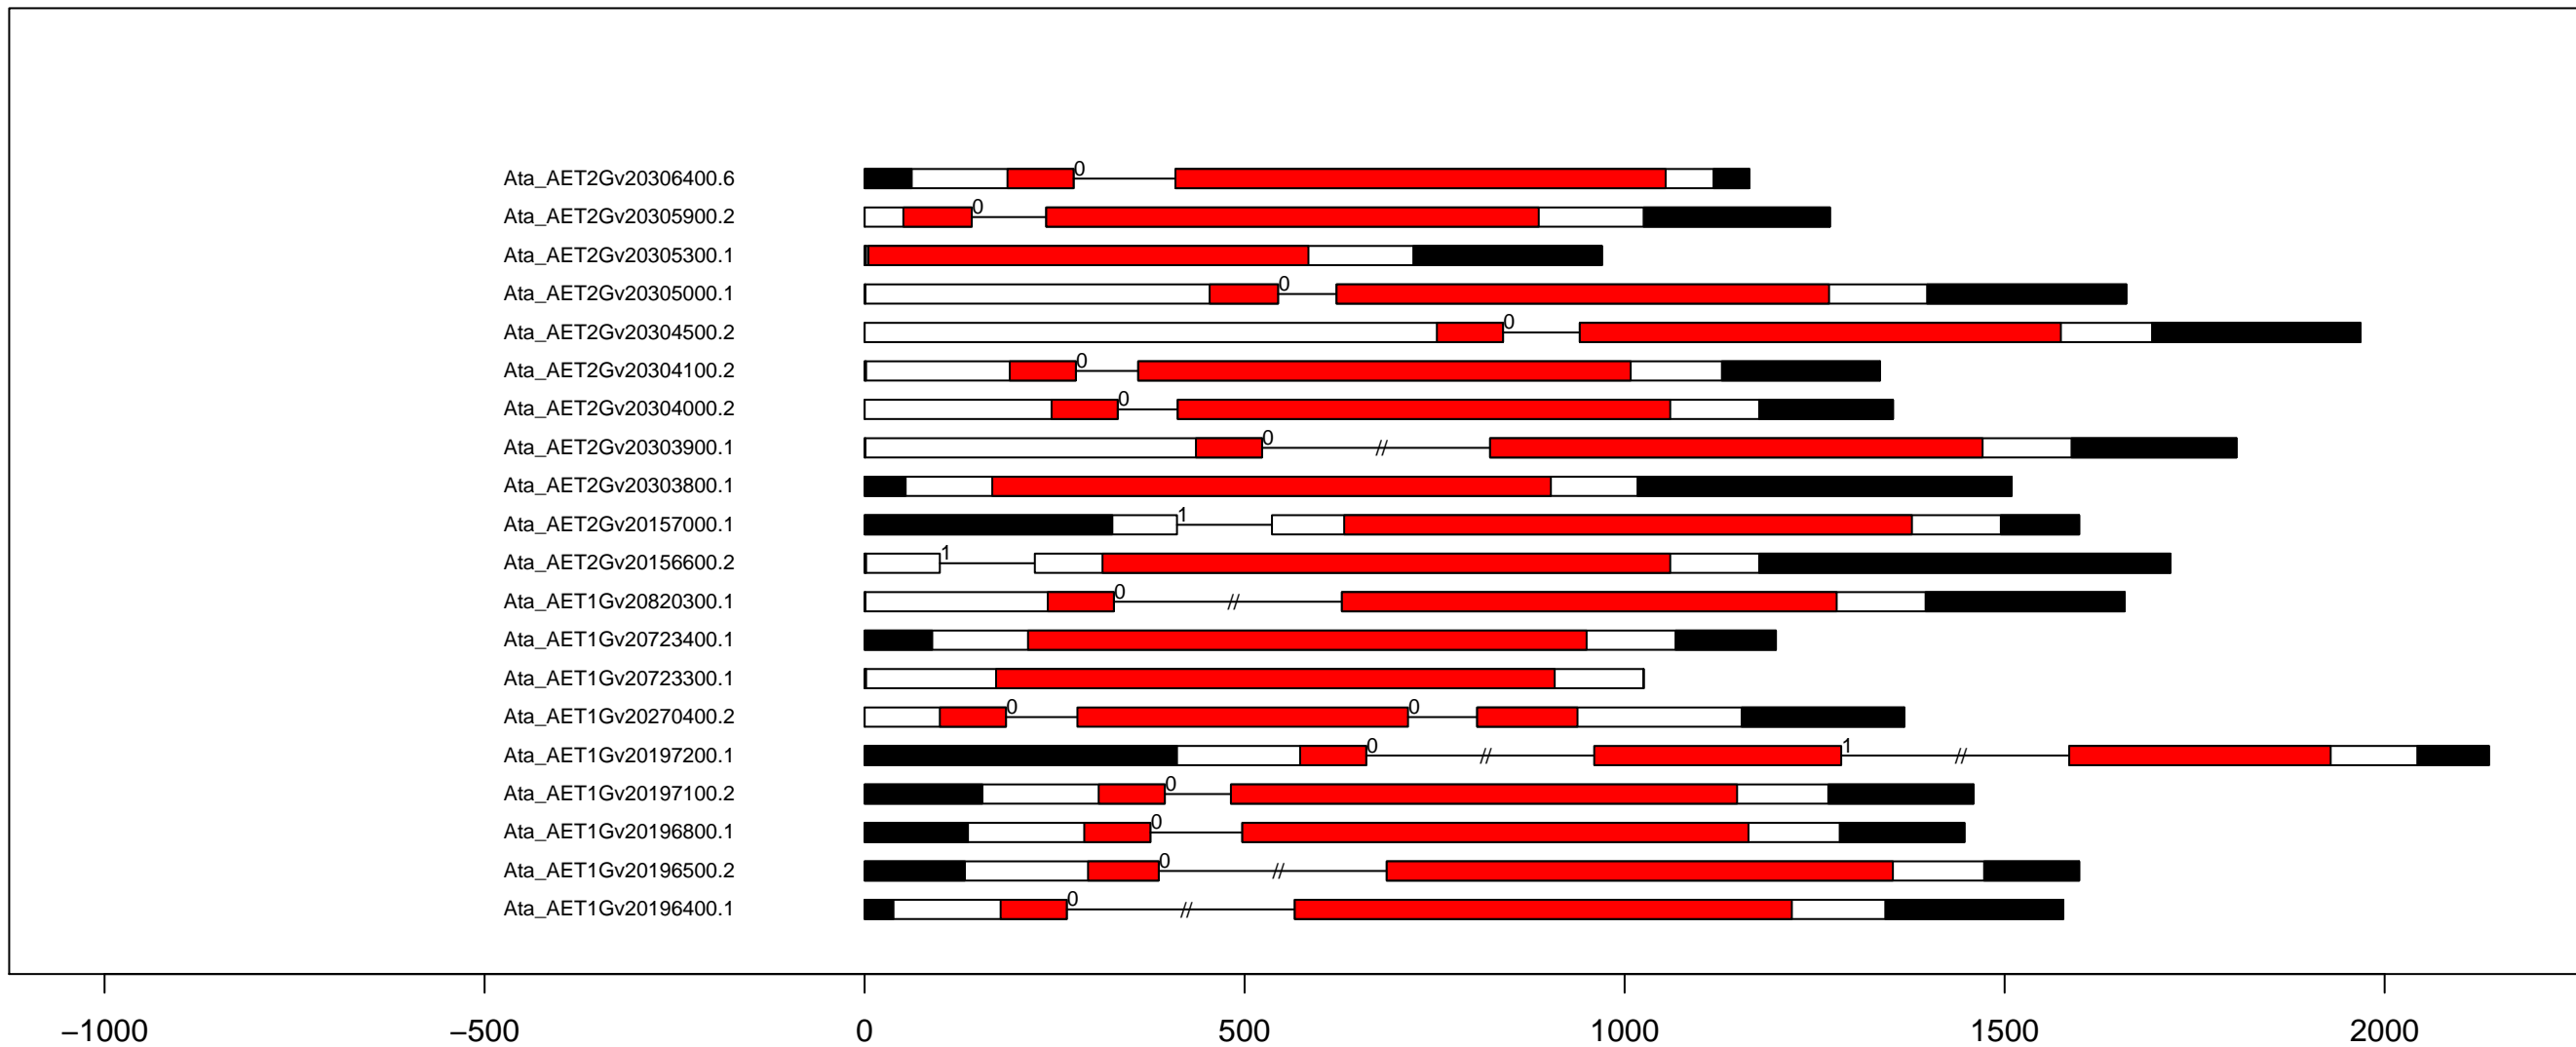



### A.ta class III peroxidase I subfamily exon-intron and prx domain diagram (part 2)

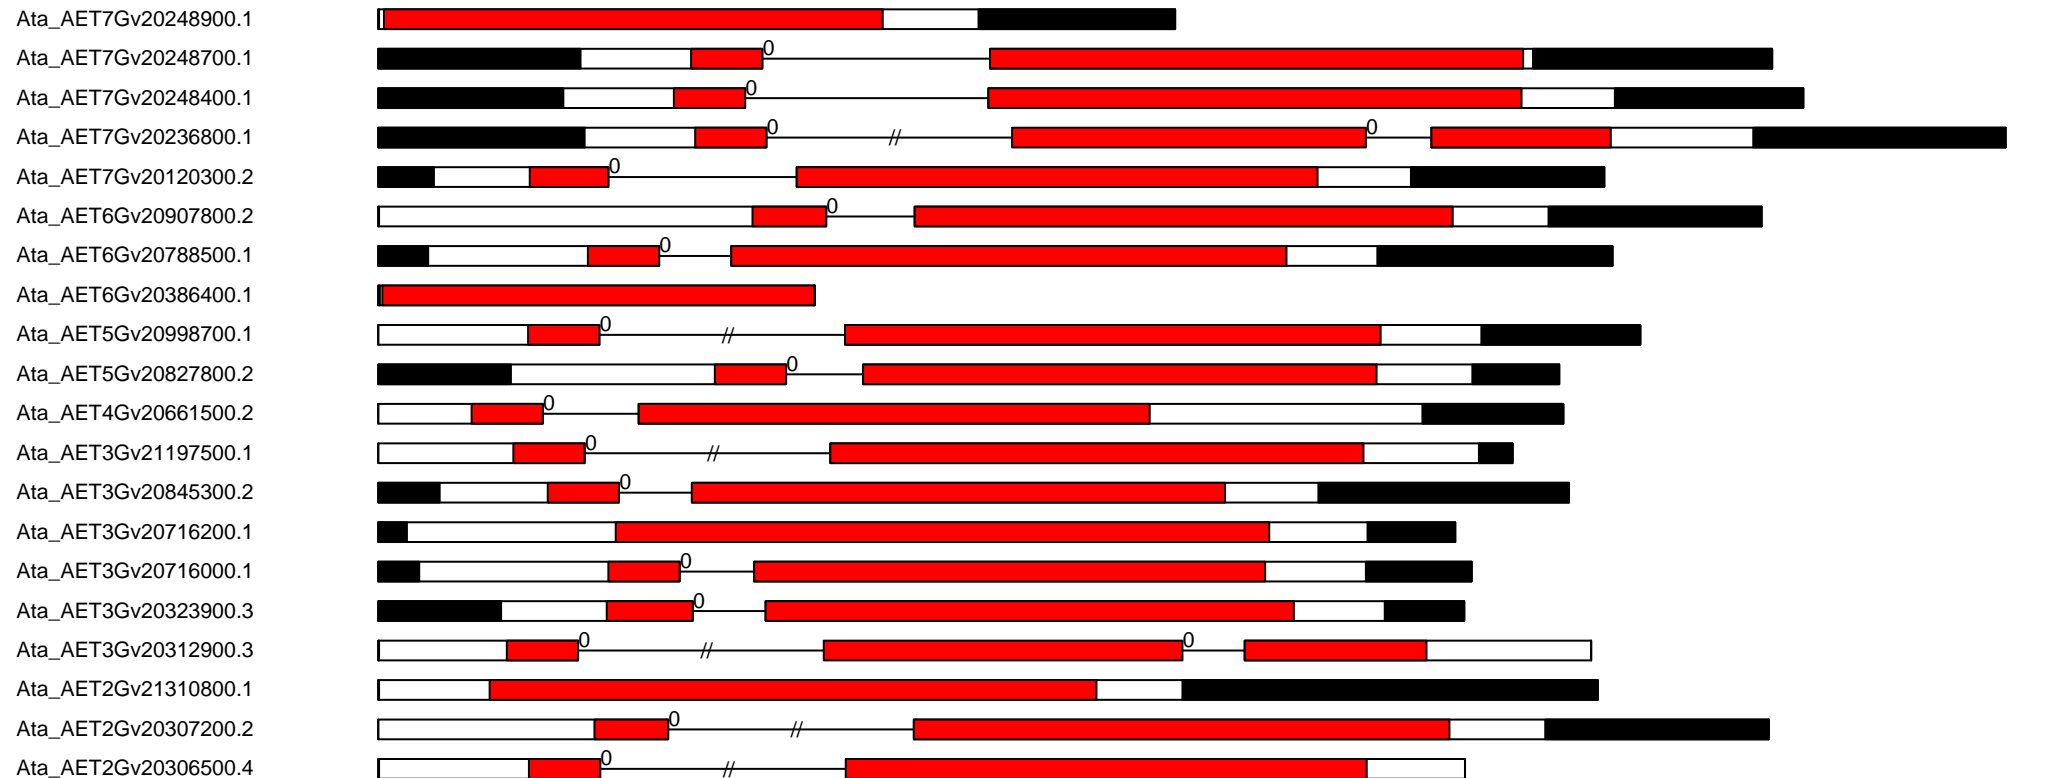

### A.ta class III peroxidase I subfamily exon-intron and prx domain diagram (part 3)

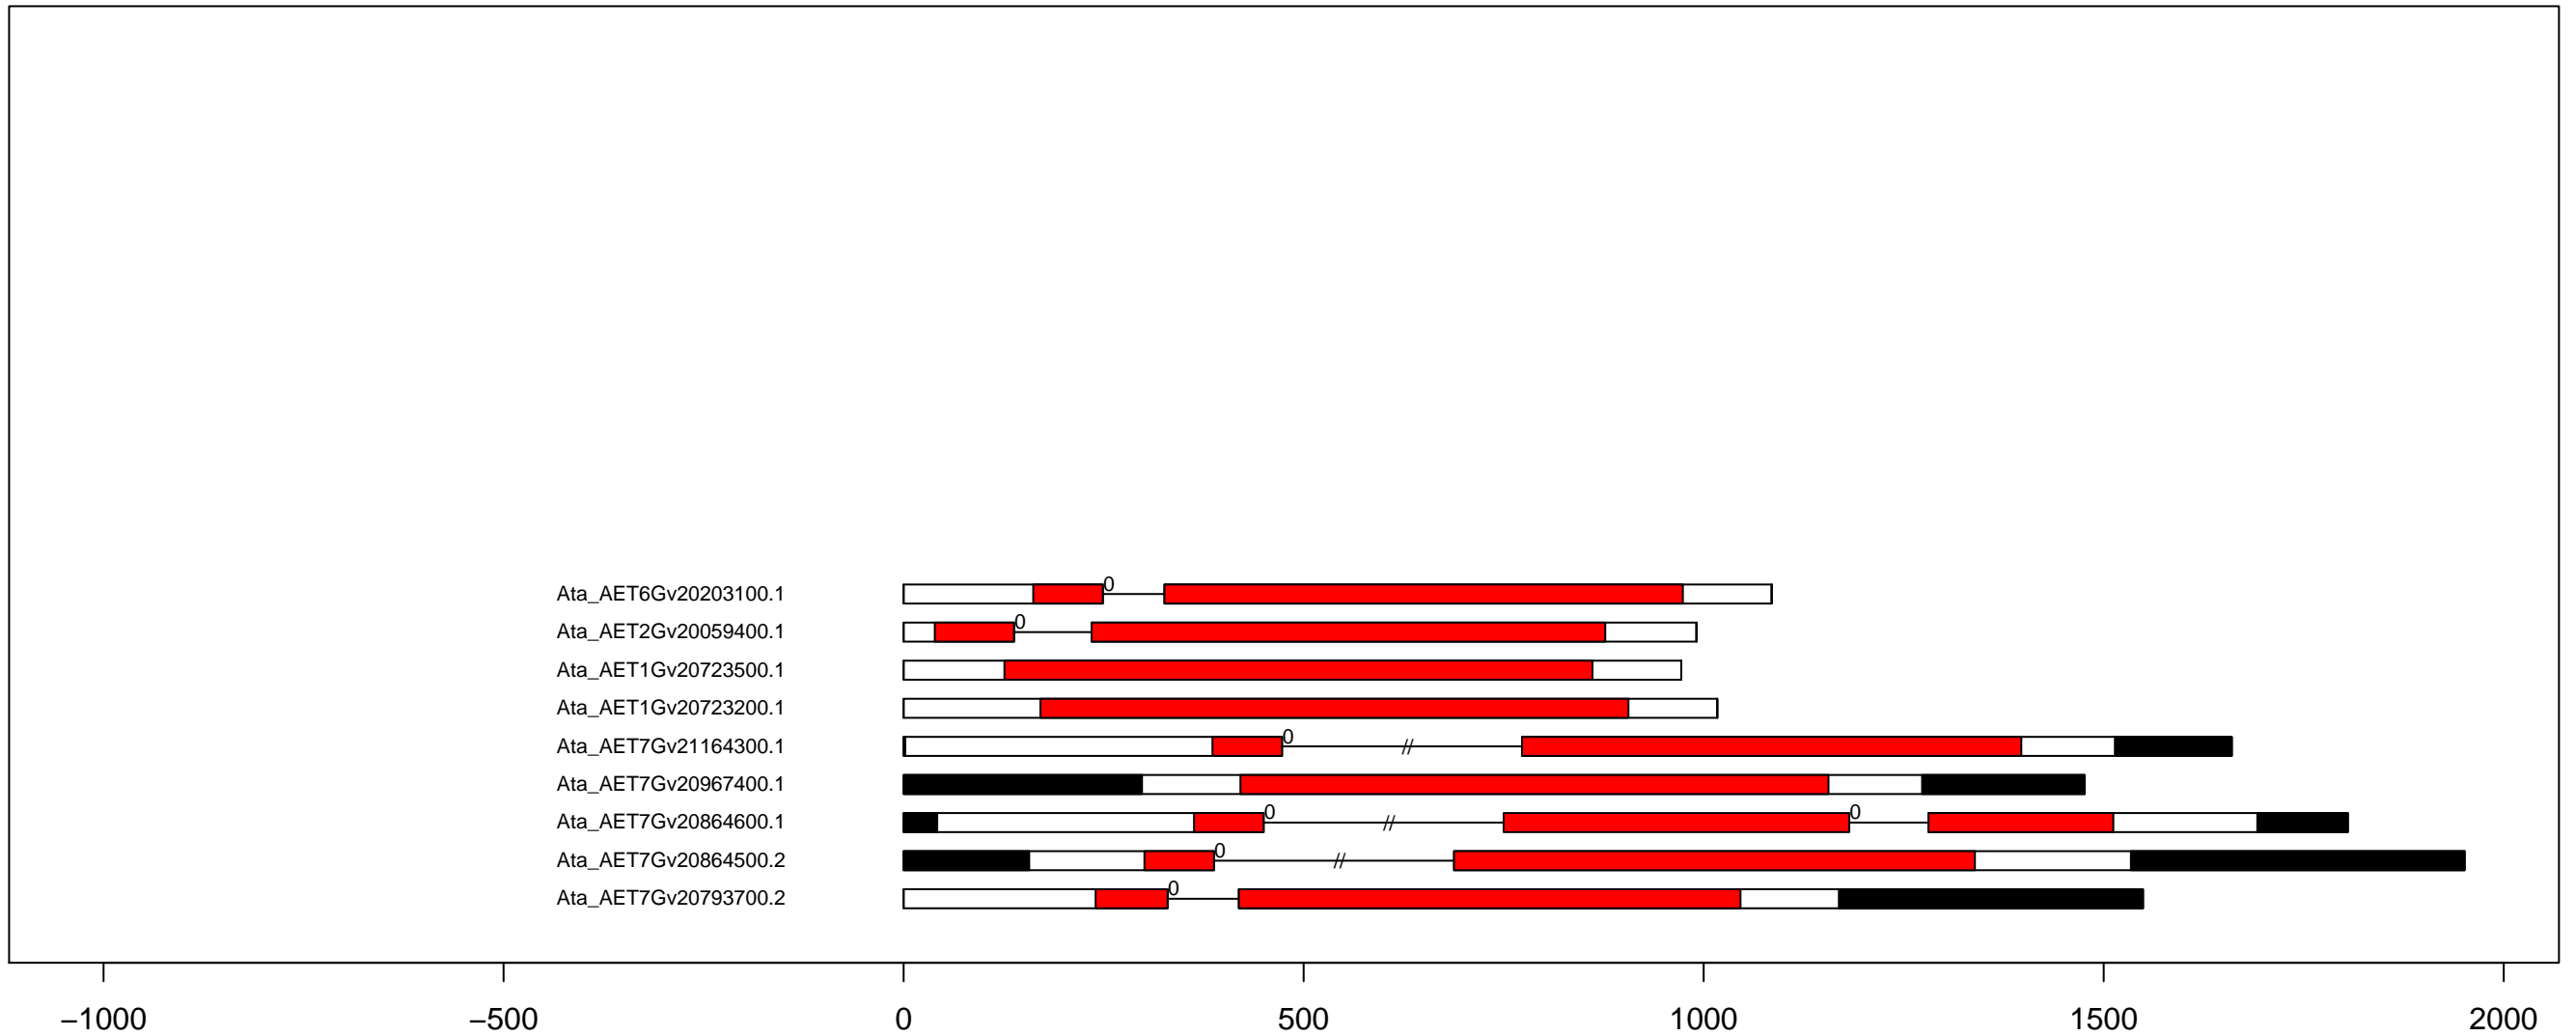

# A.ta class III peroxidase II subfamily exon-intron and prx domain diagram (all)

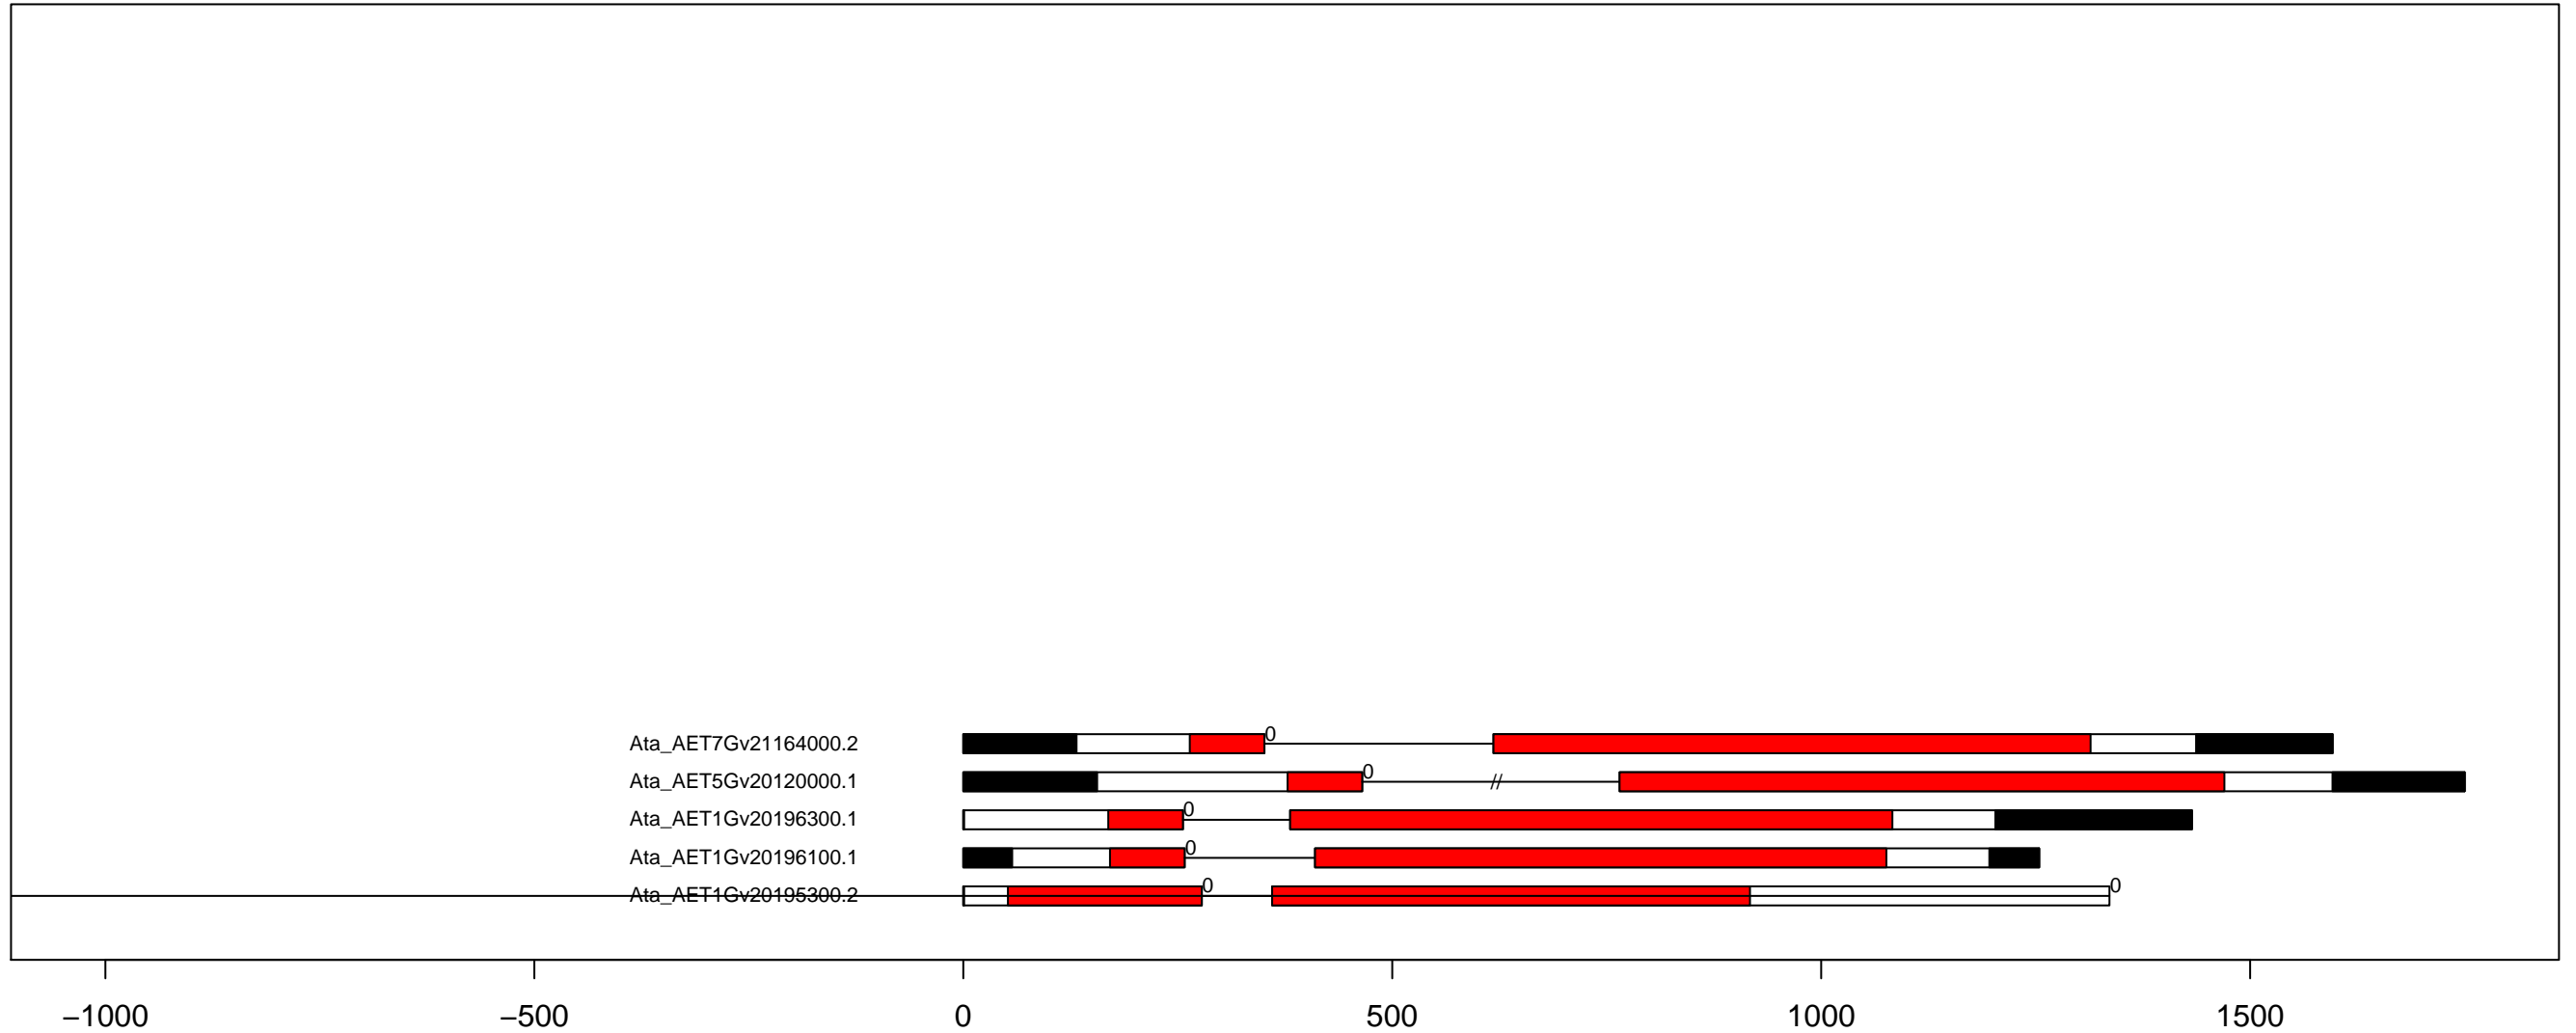

# A.ta class III peroxidase III subfamily exon-intron and prx domain diagram (all)

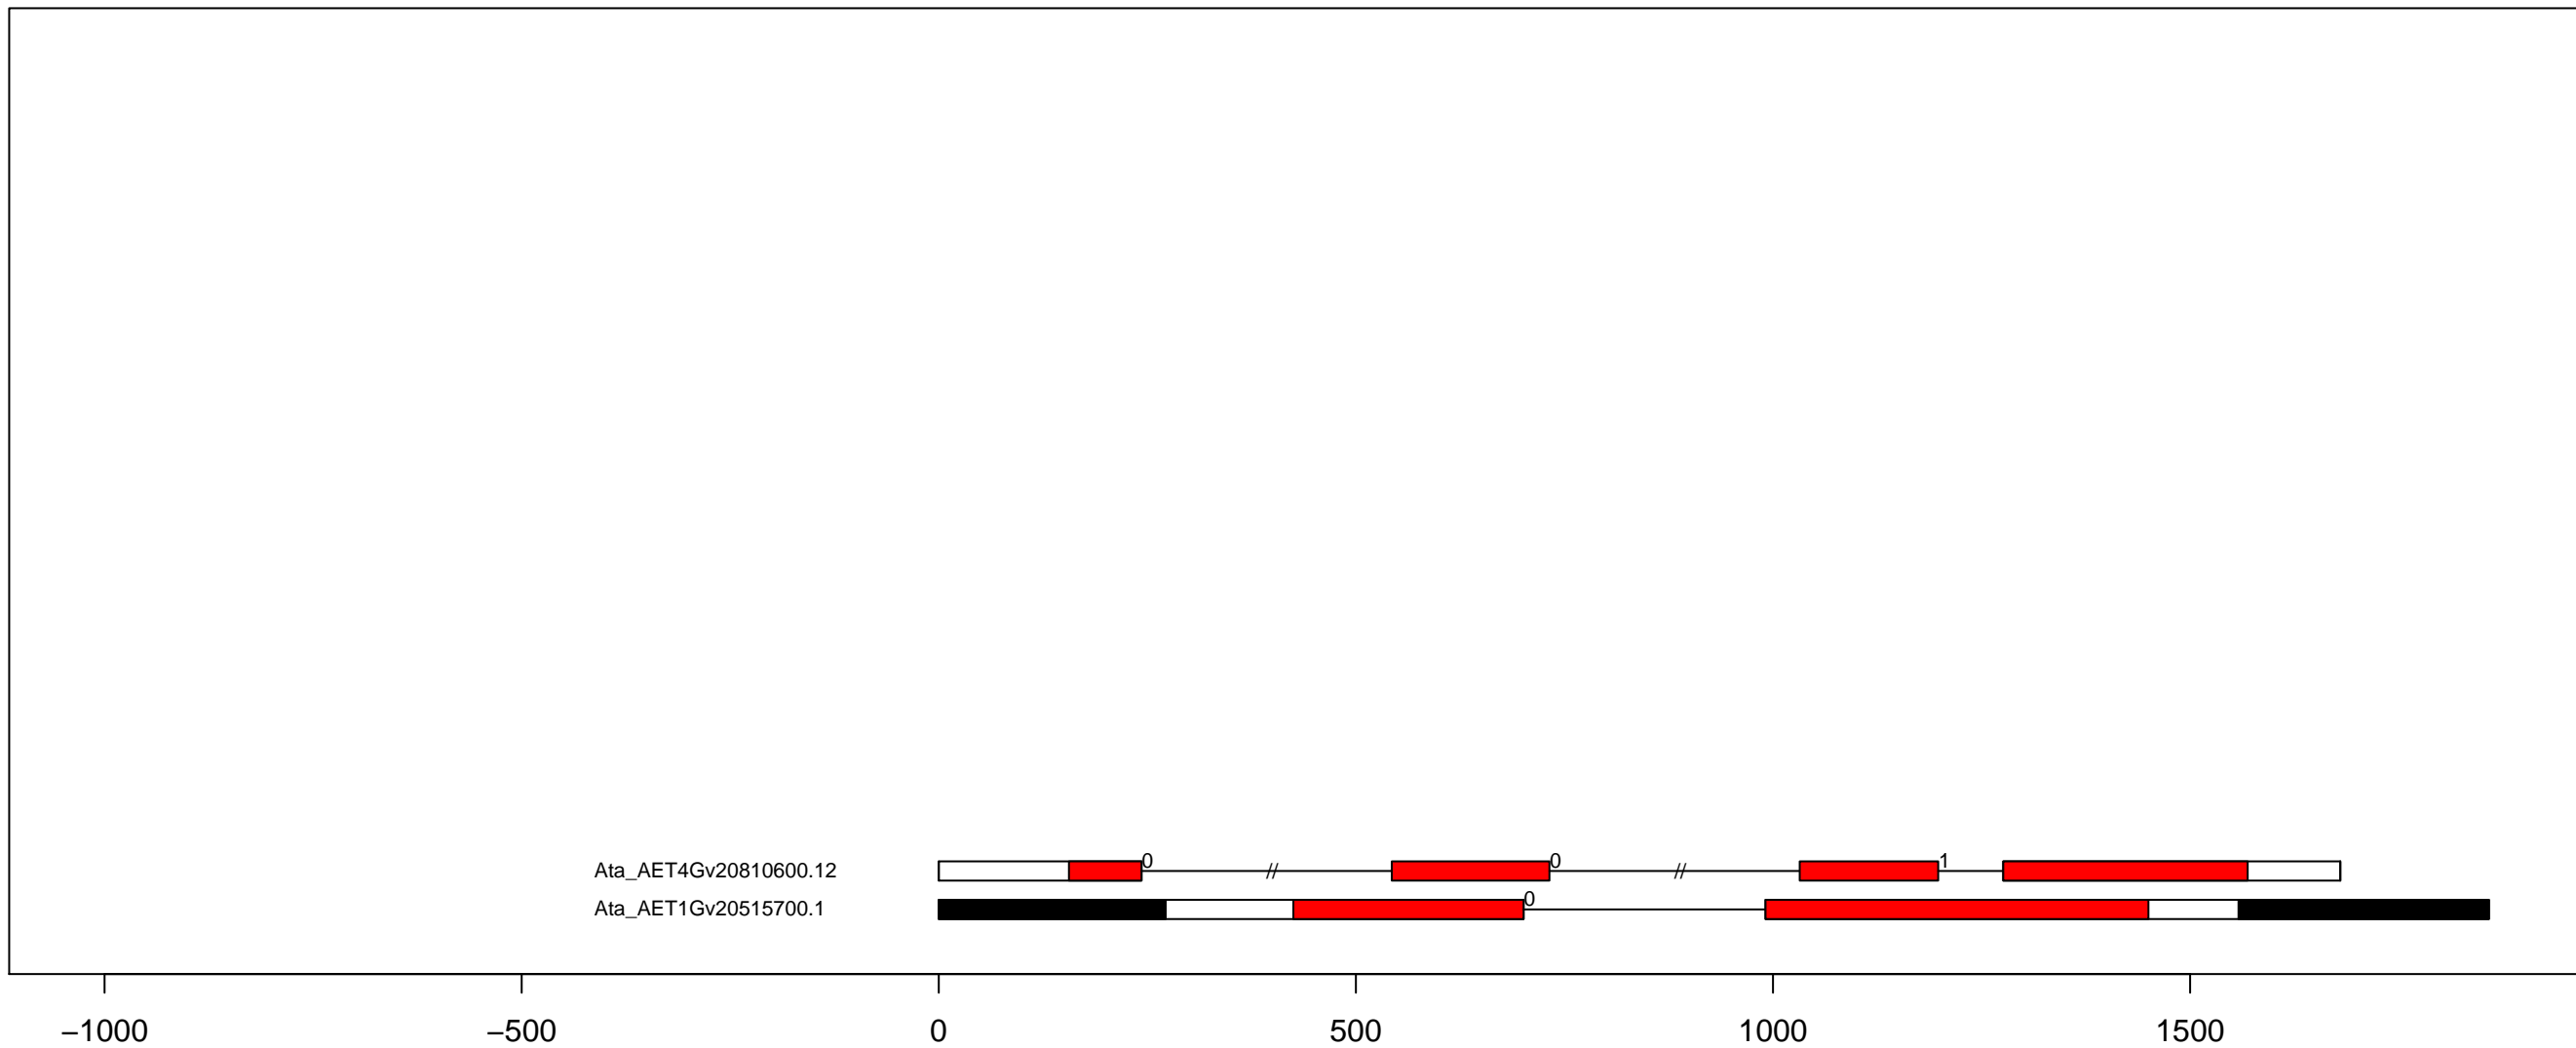





### A.ta class III peroxidase VI subfamily exon-intron and prx domain diagram (all)

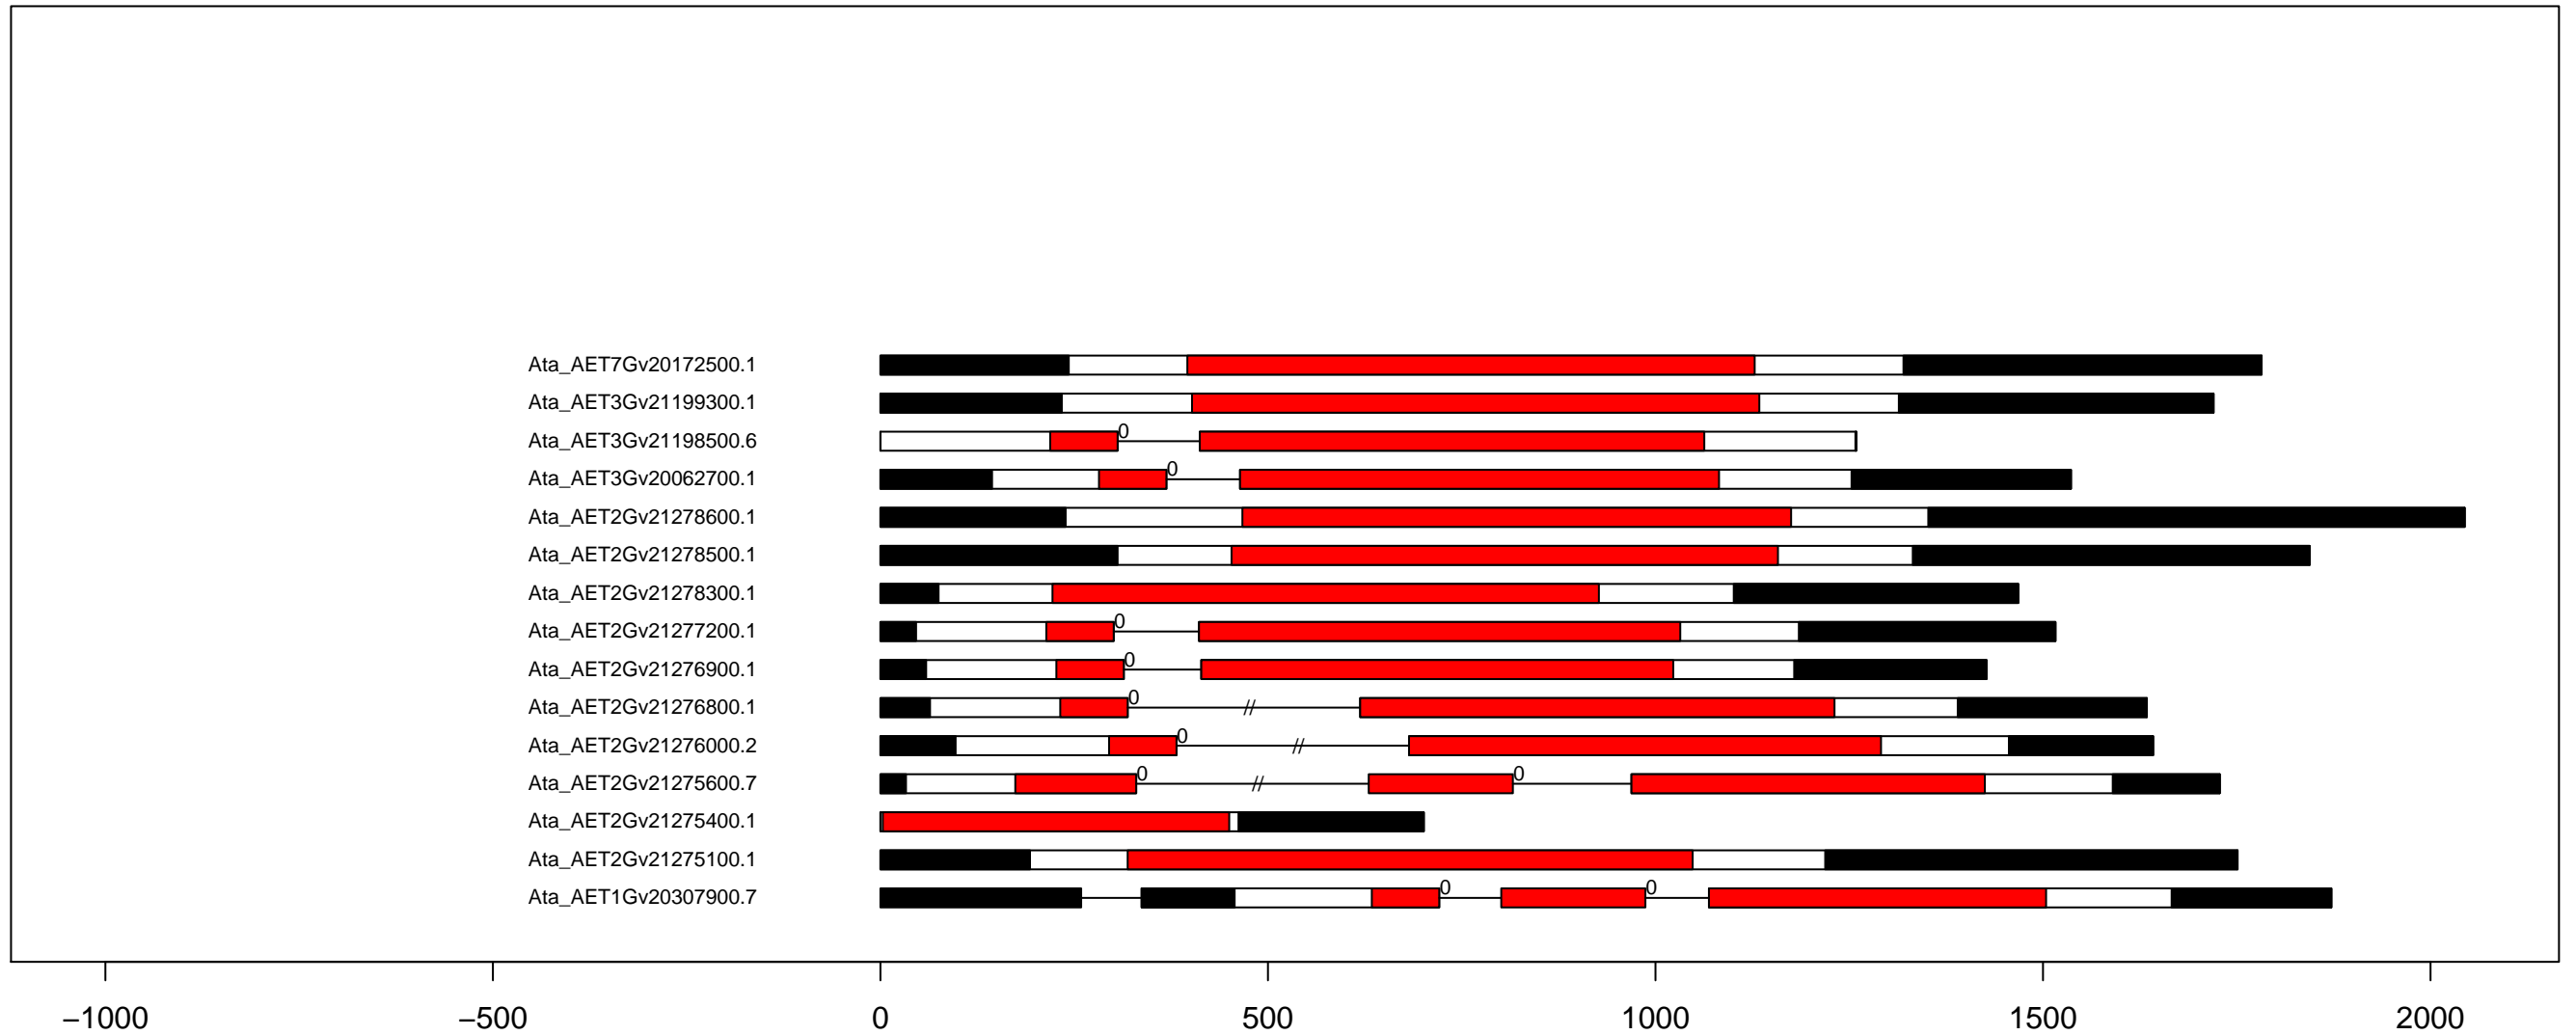







# A.ta class III peroxidase X subfamily exon-intron and prx domain diagram (all)

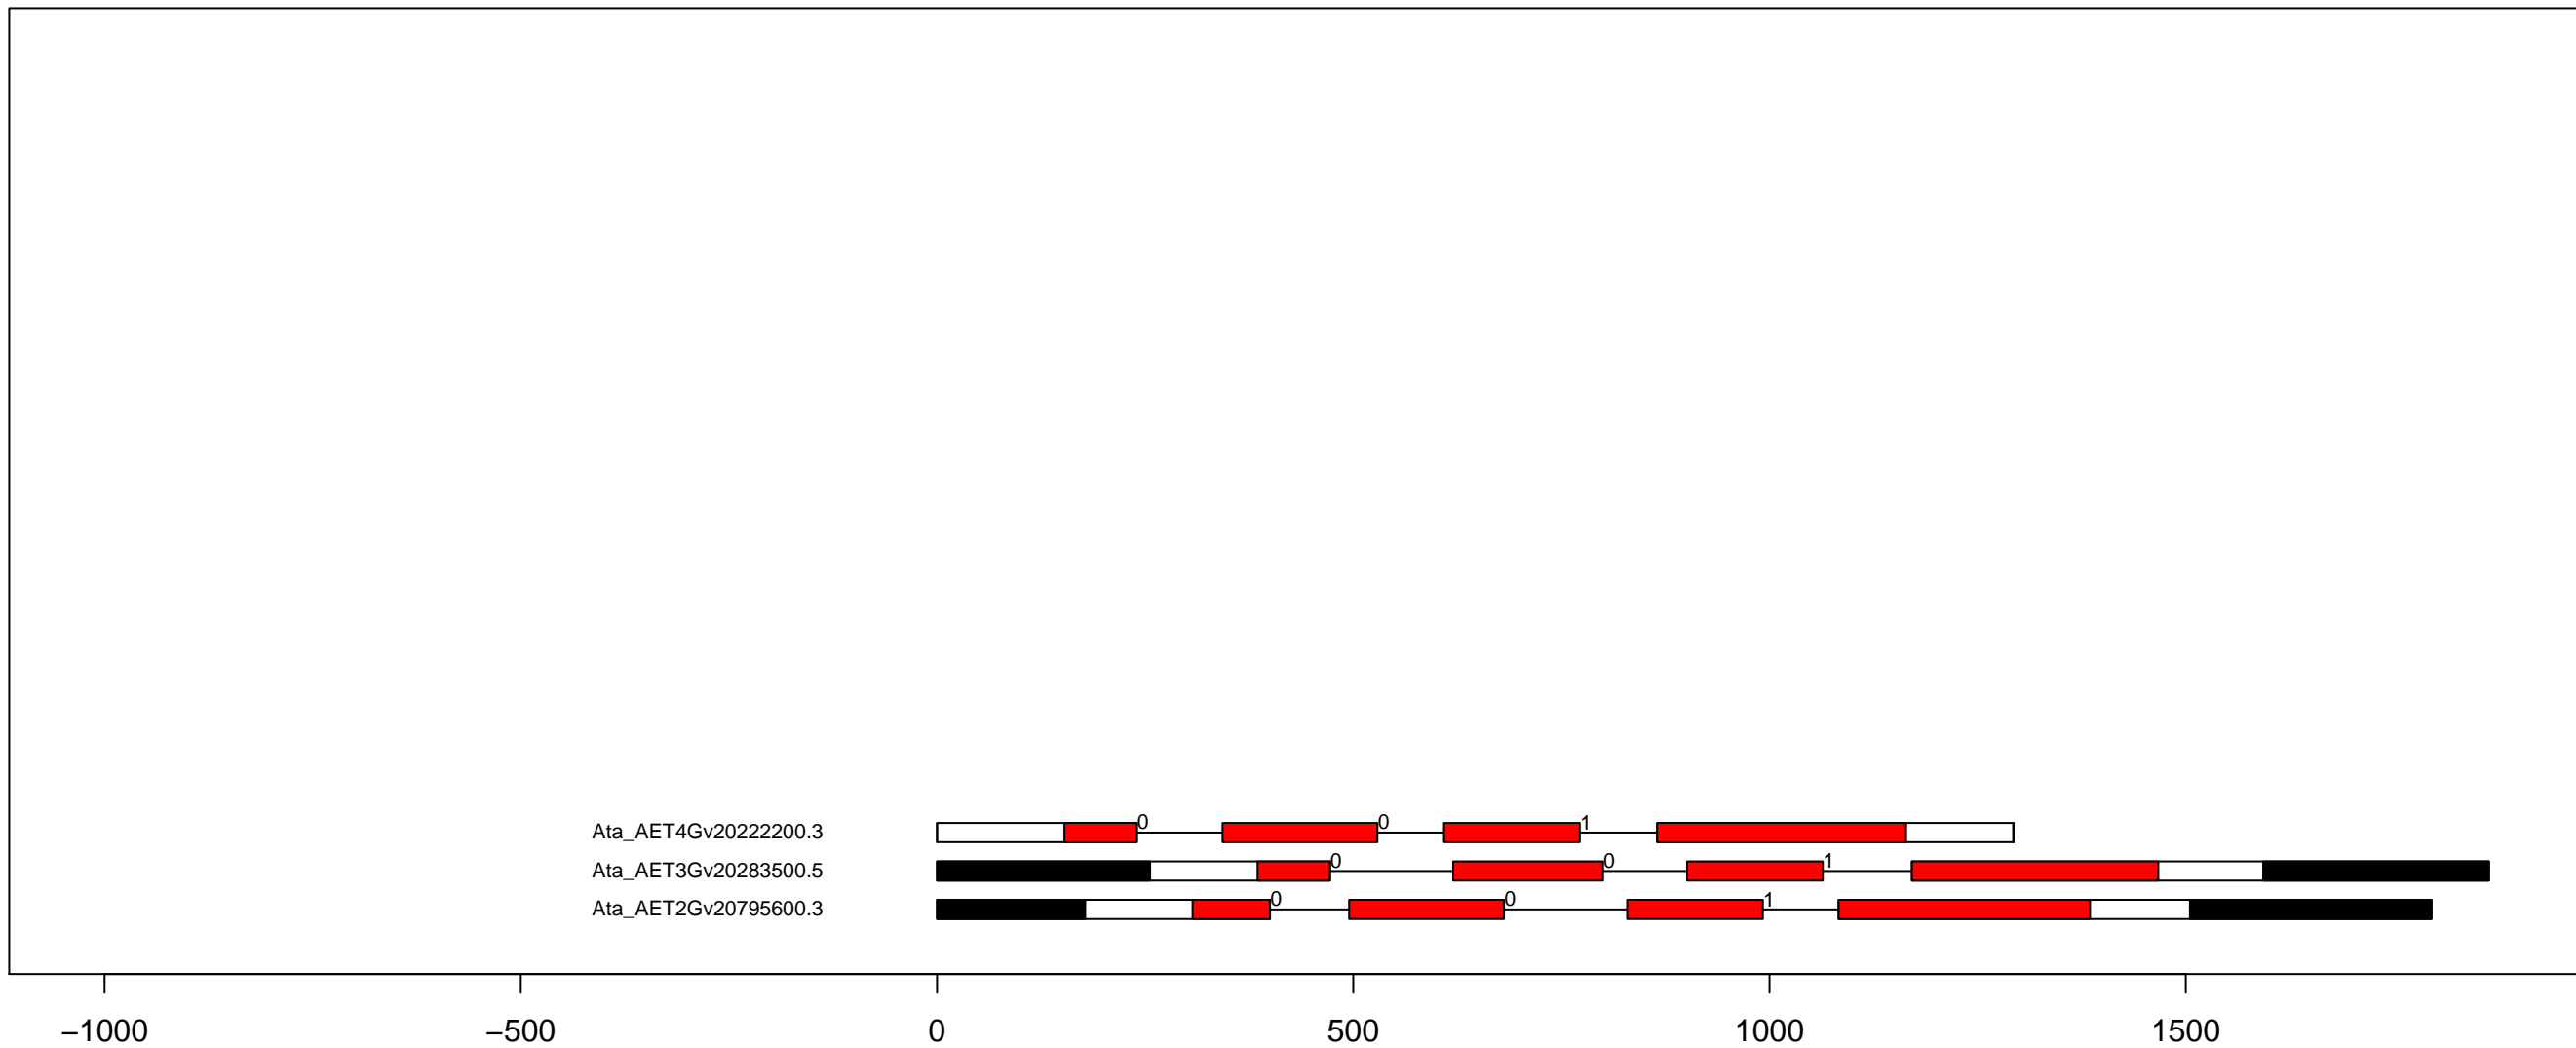

# A.ta class III peroxidase XI subfamily exon-intron and prx domain diagram (all)

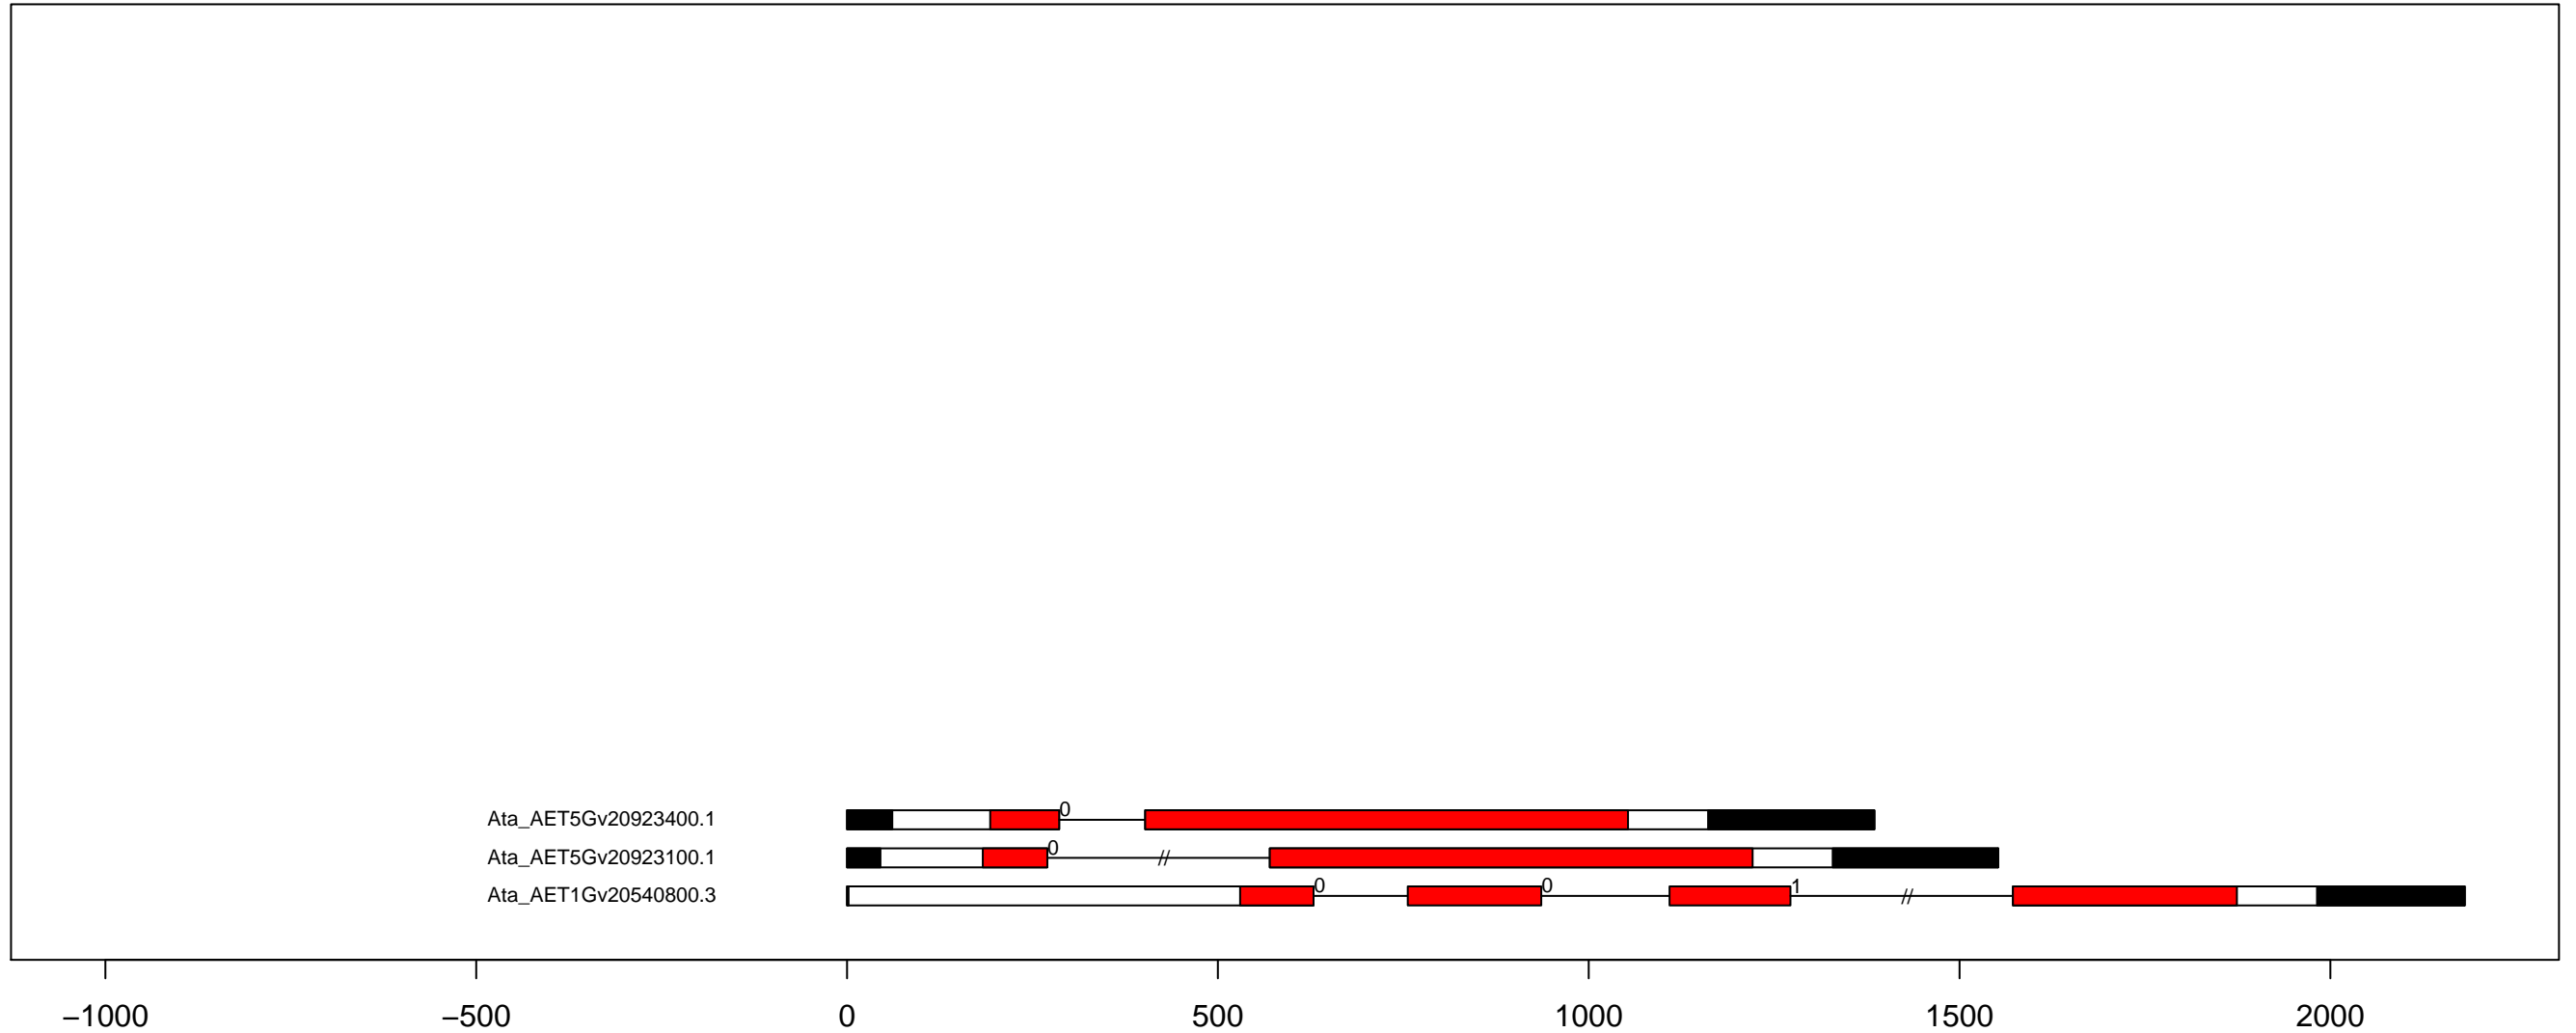

### A.ta class III peroxidase XII subfamily exon-intron and prx domain diagram (all)

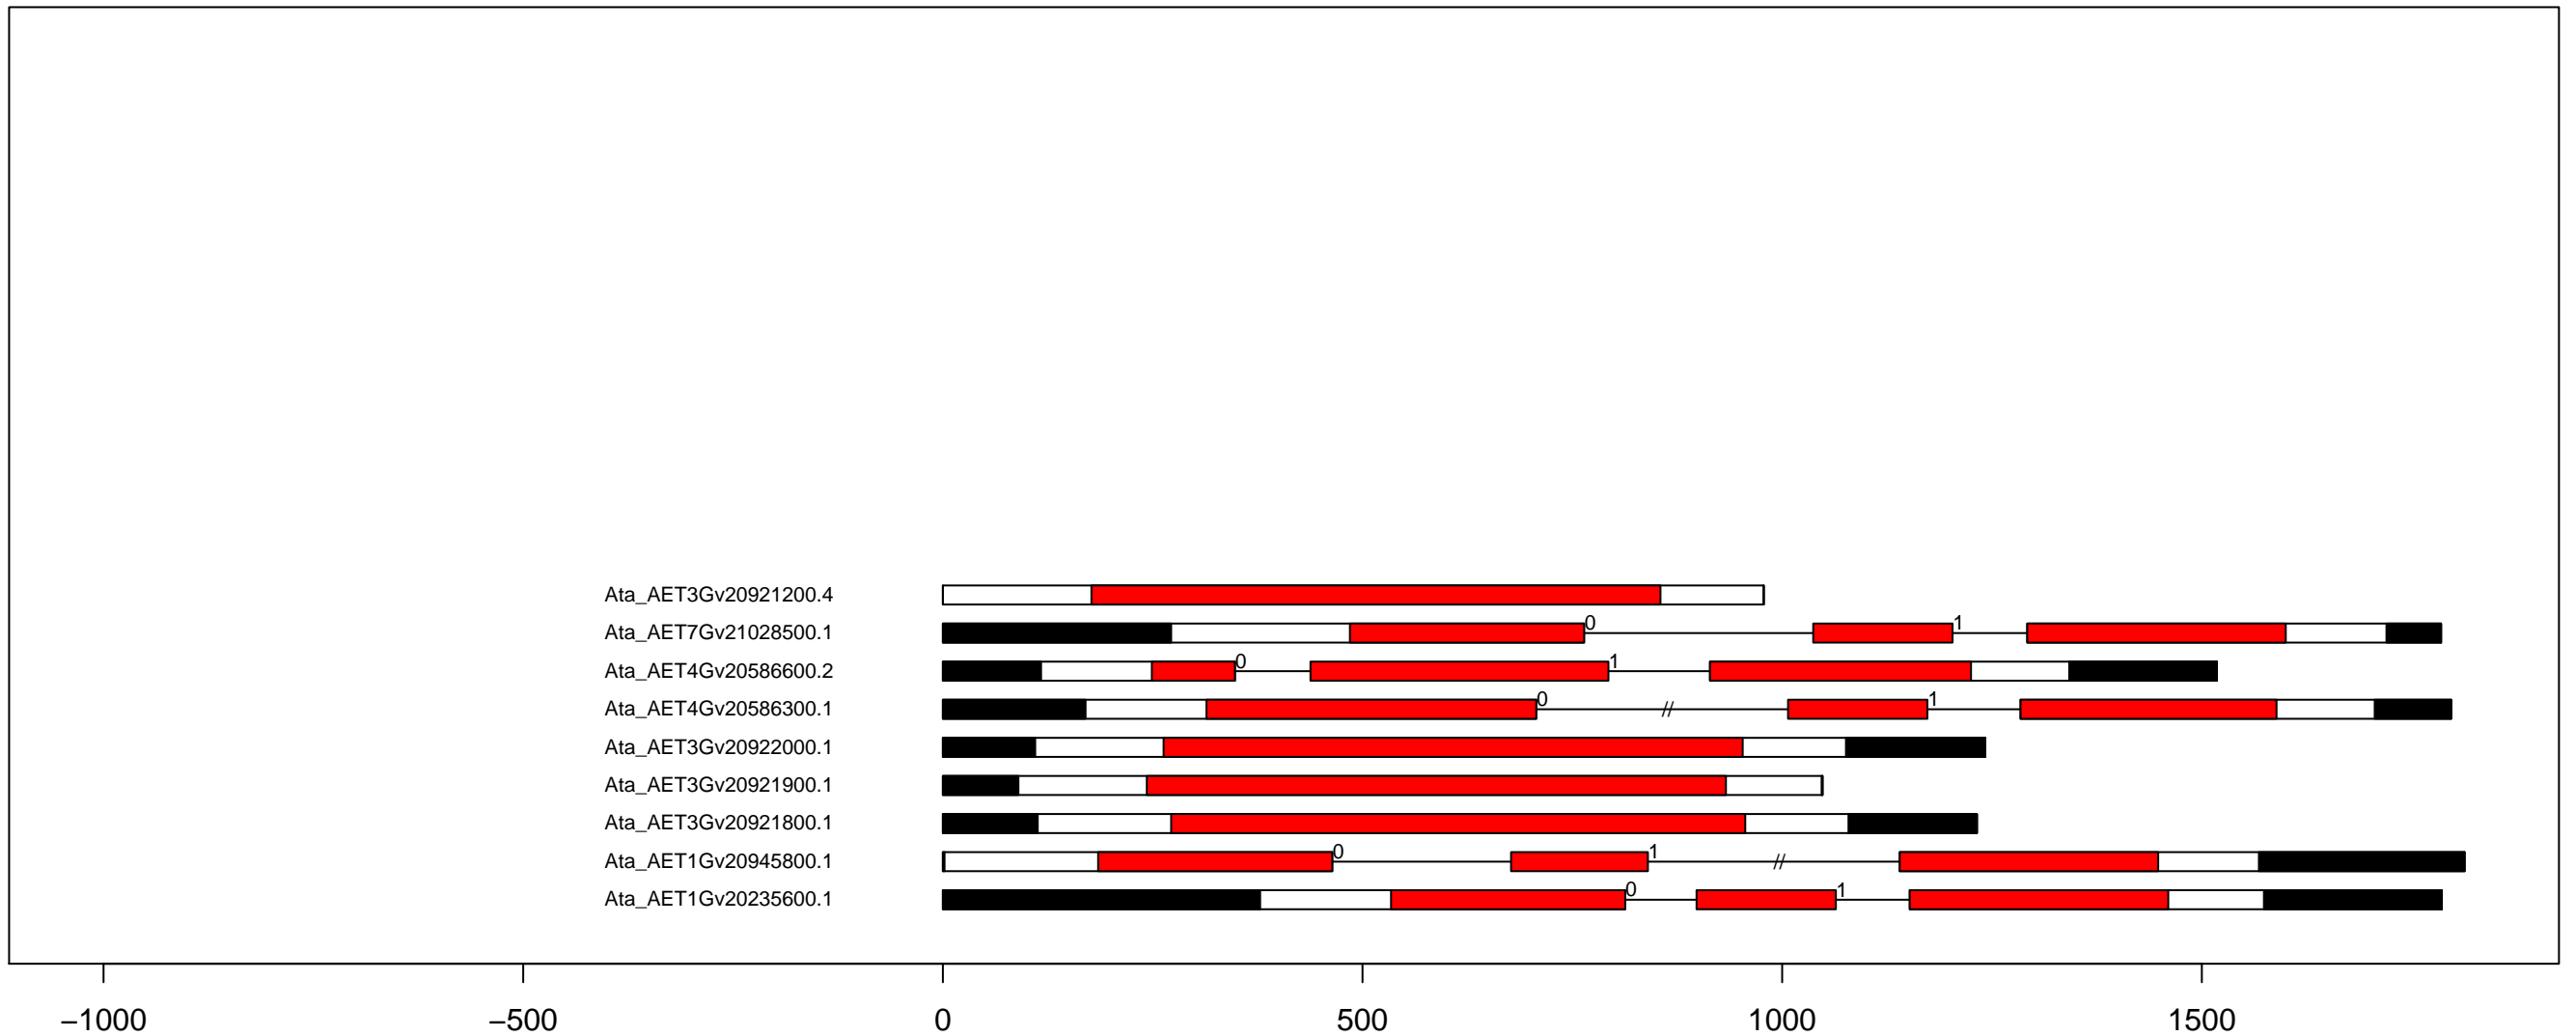

# A.ta class III peroxidase XIII subfamily exon-intron and prx domain diagram (all)

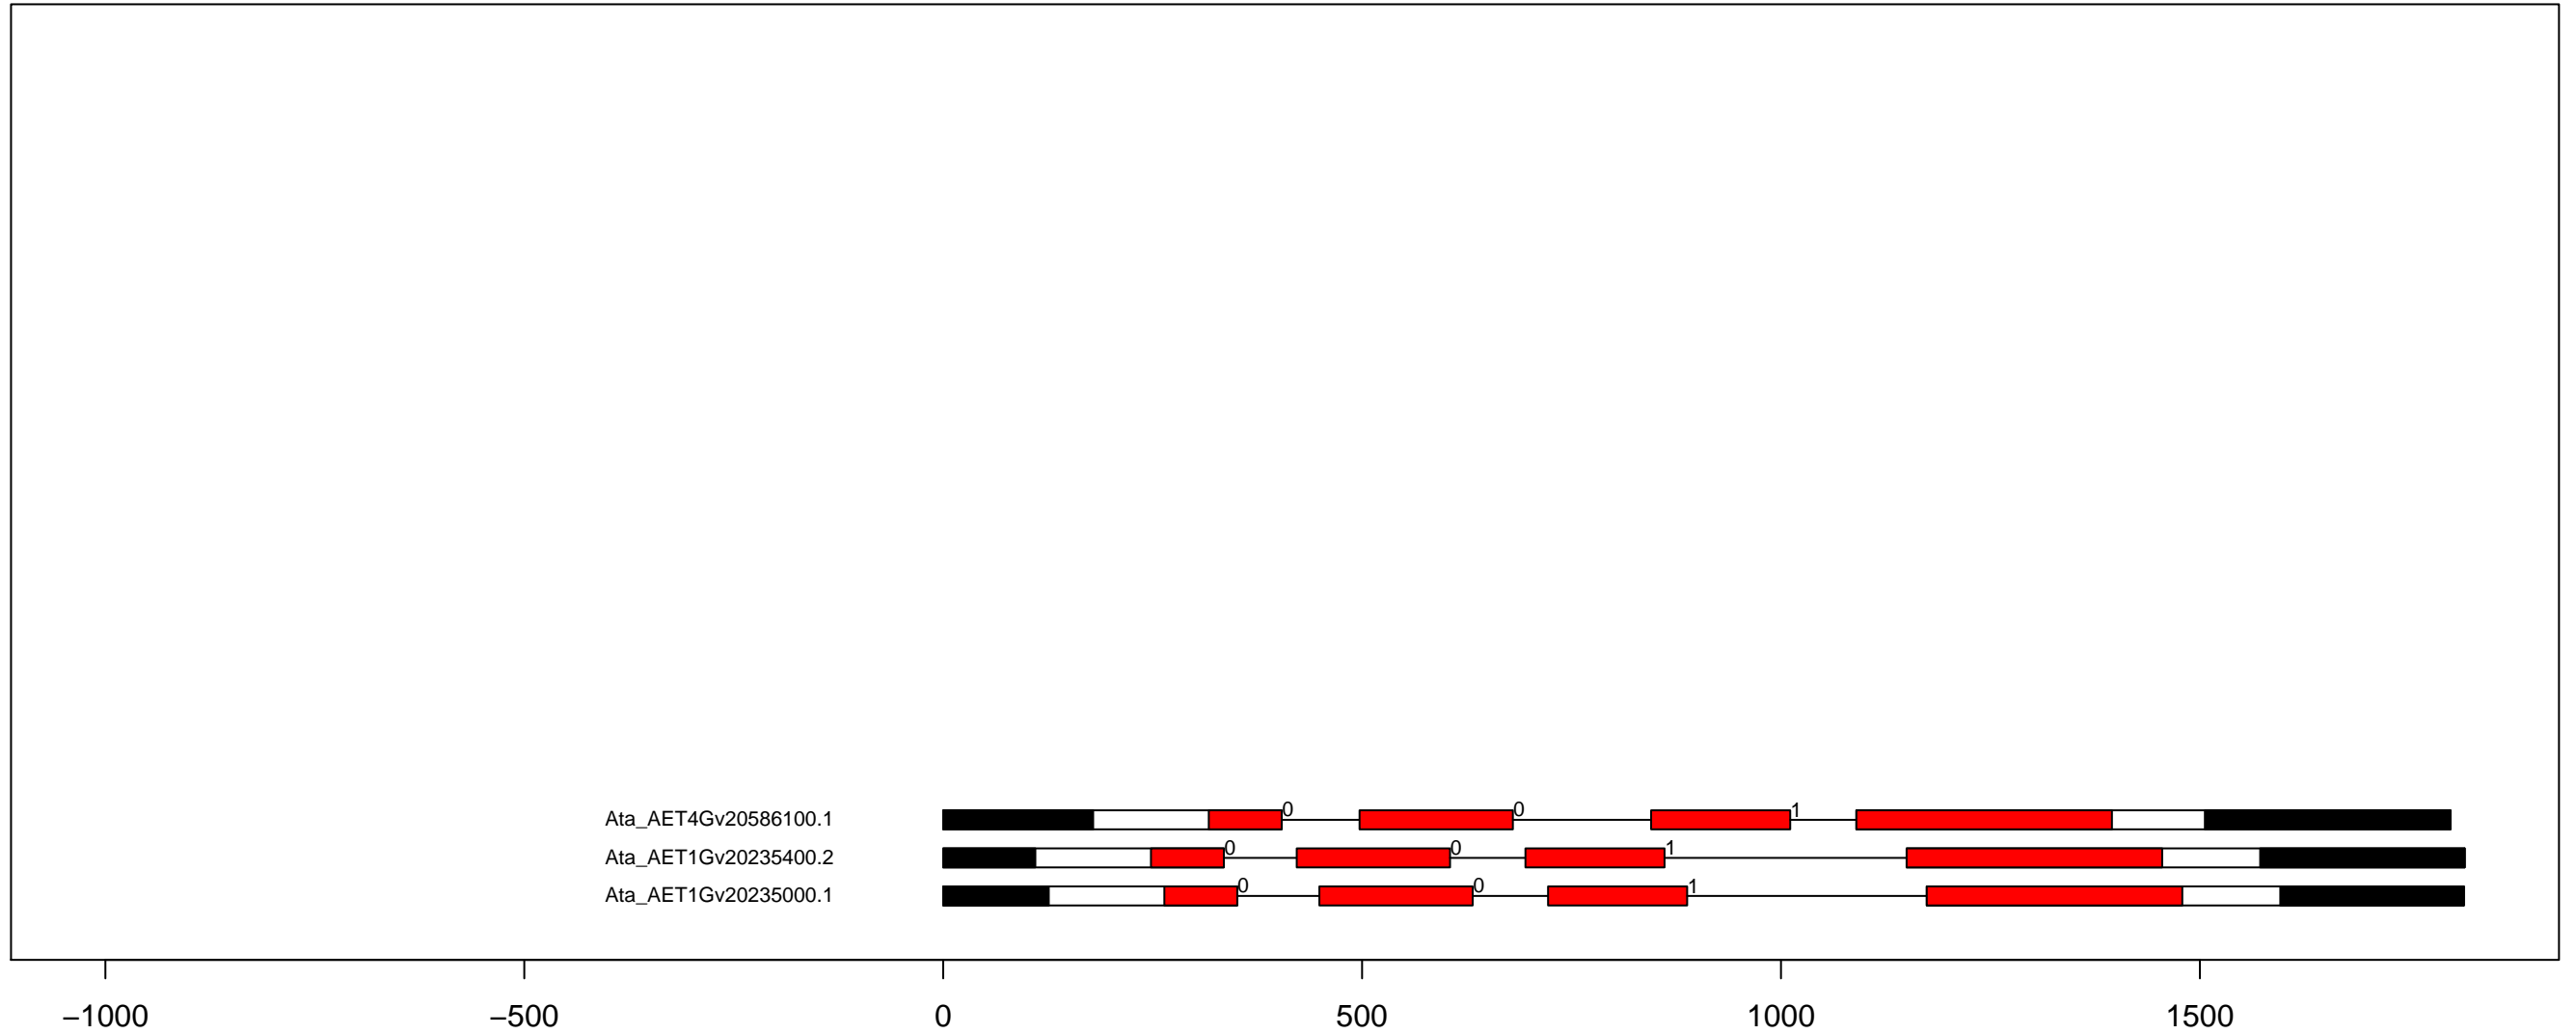

# A.ta class III peroxidase XIV subfamily exon-intron and prx domain diagram (all)

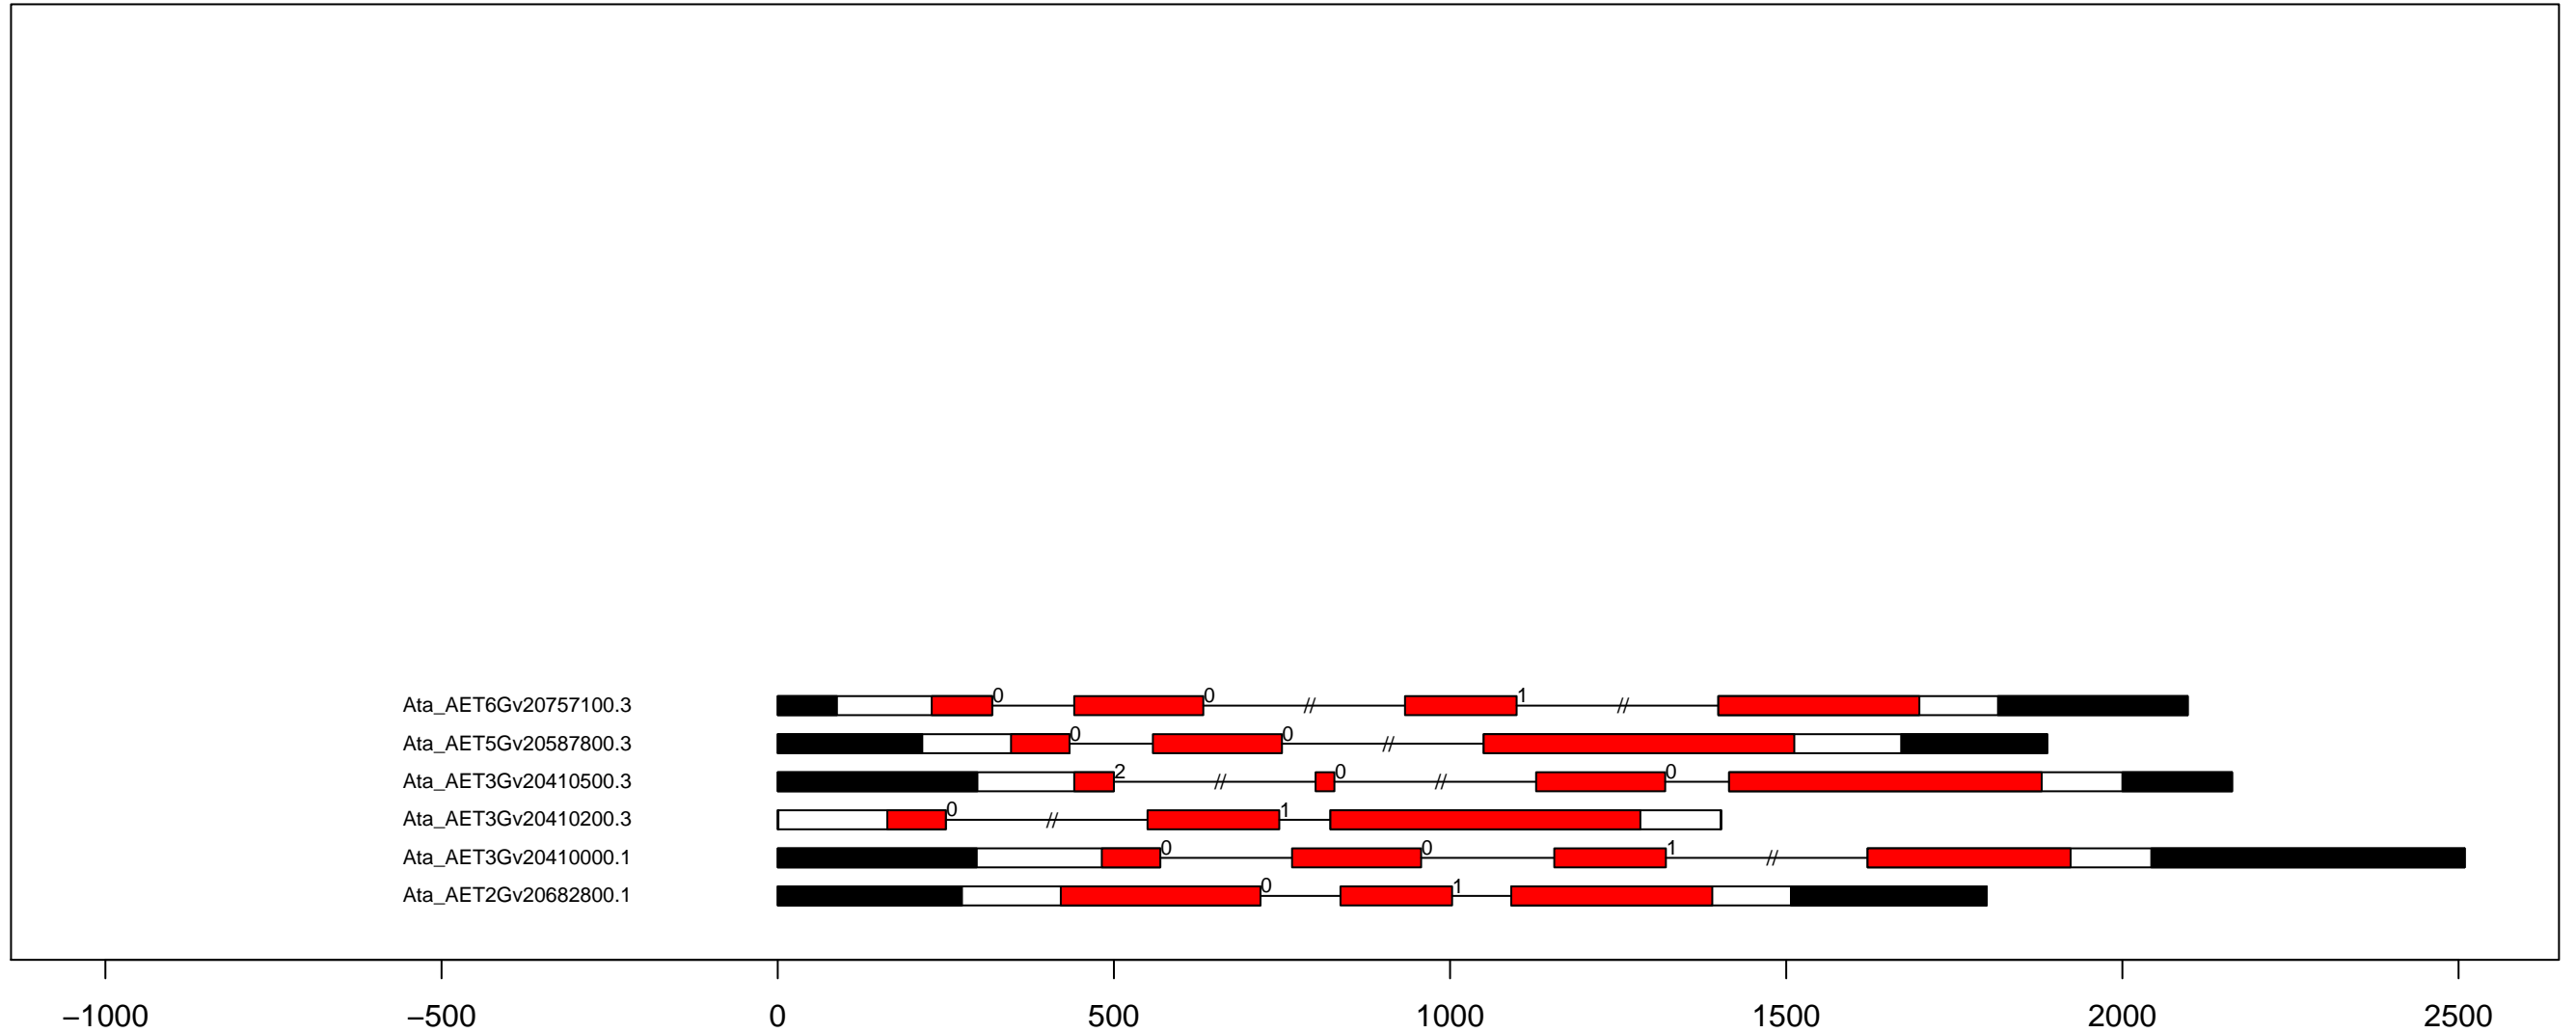

# A.ta class III peroxidase XV subfamily exon-intron and prx domain diagram (all)

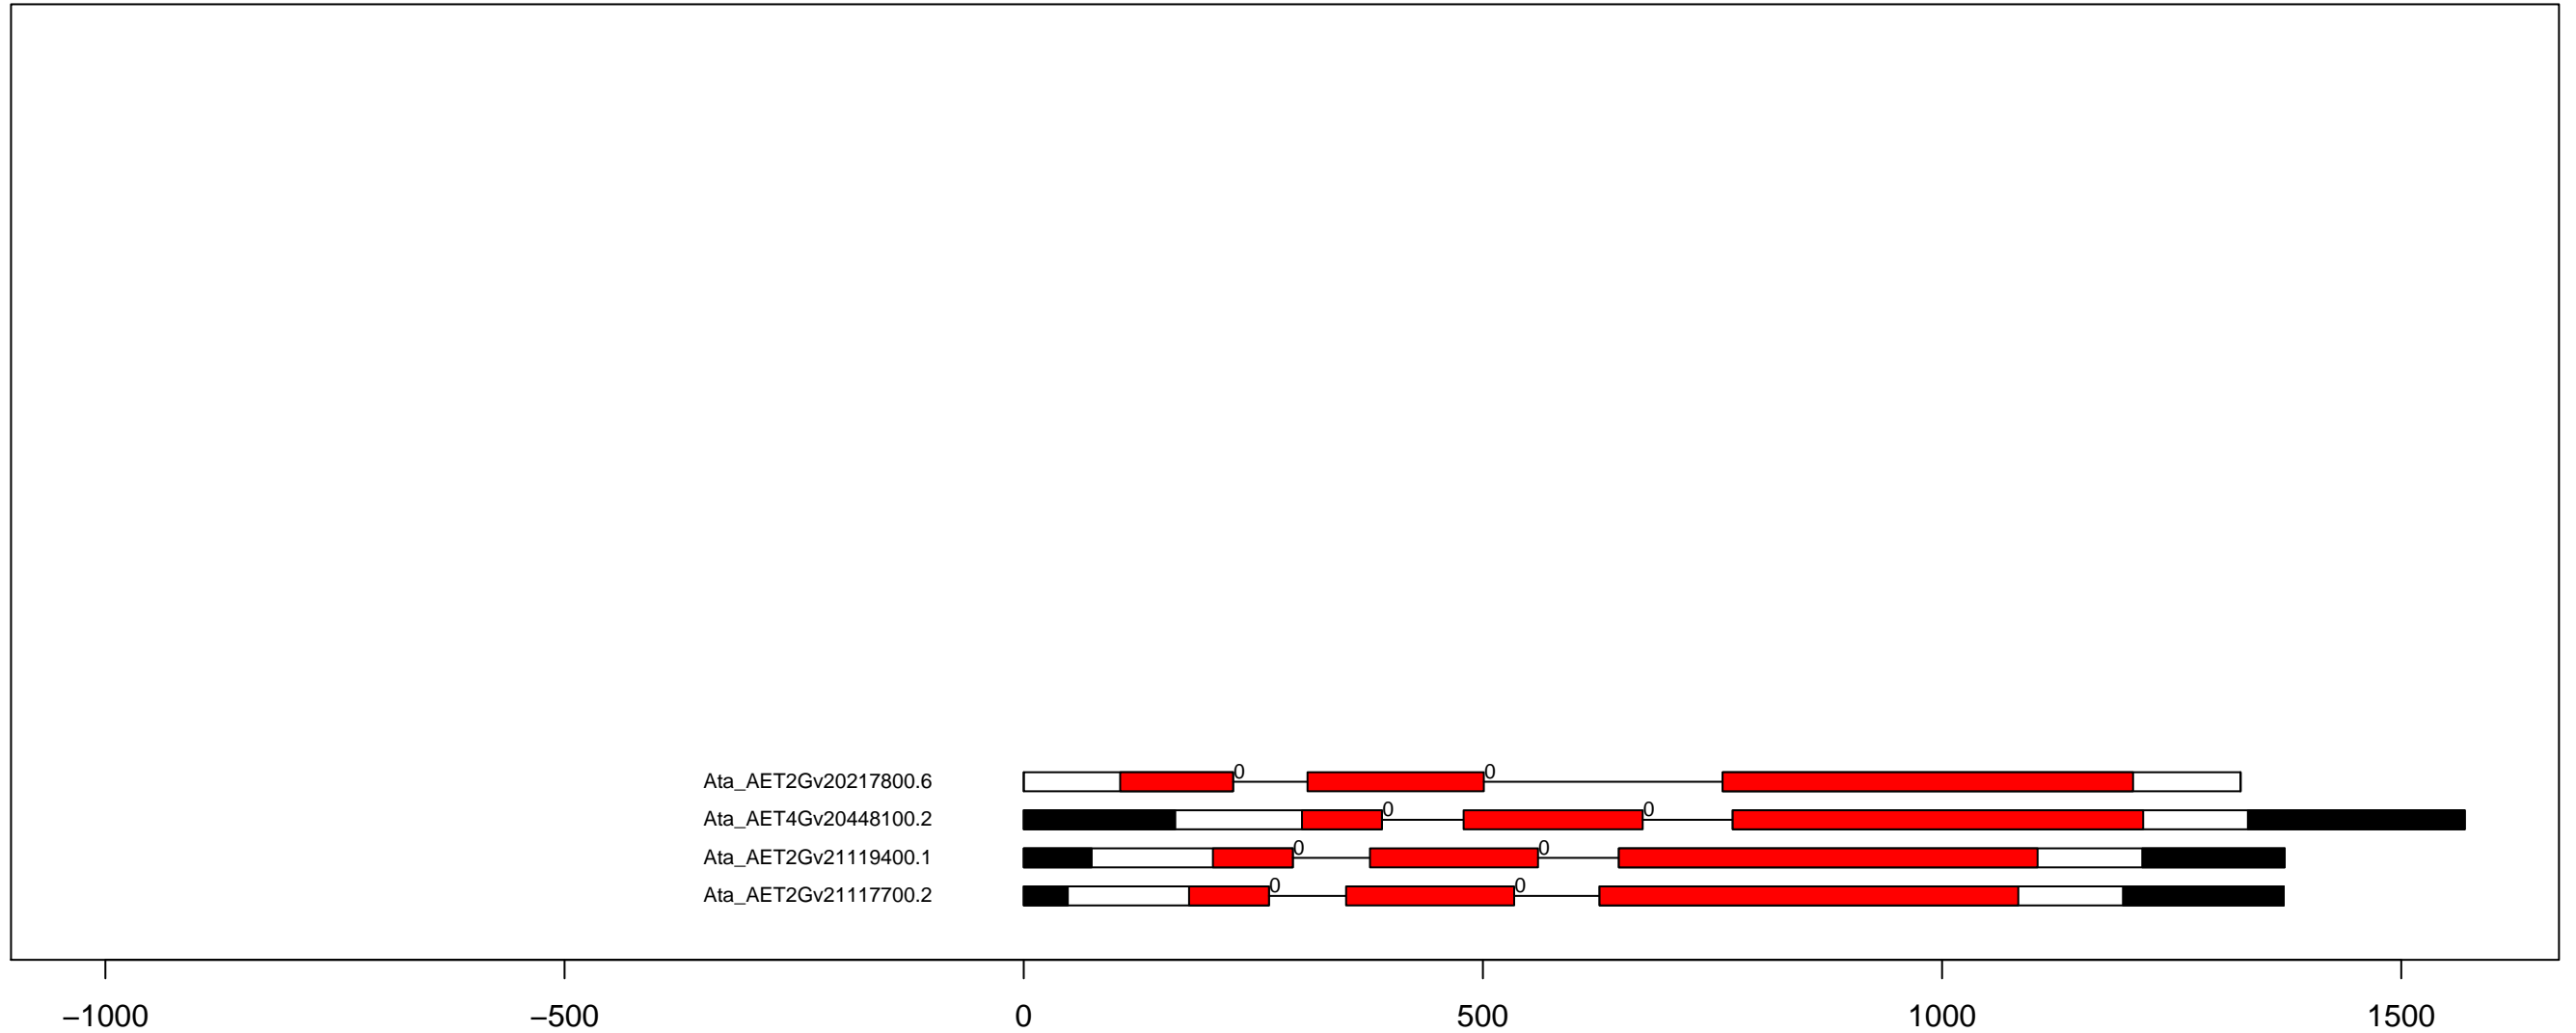

### A.ta class III peroxidase XVI subfamily exon-intron and prx domain diagram (all)

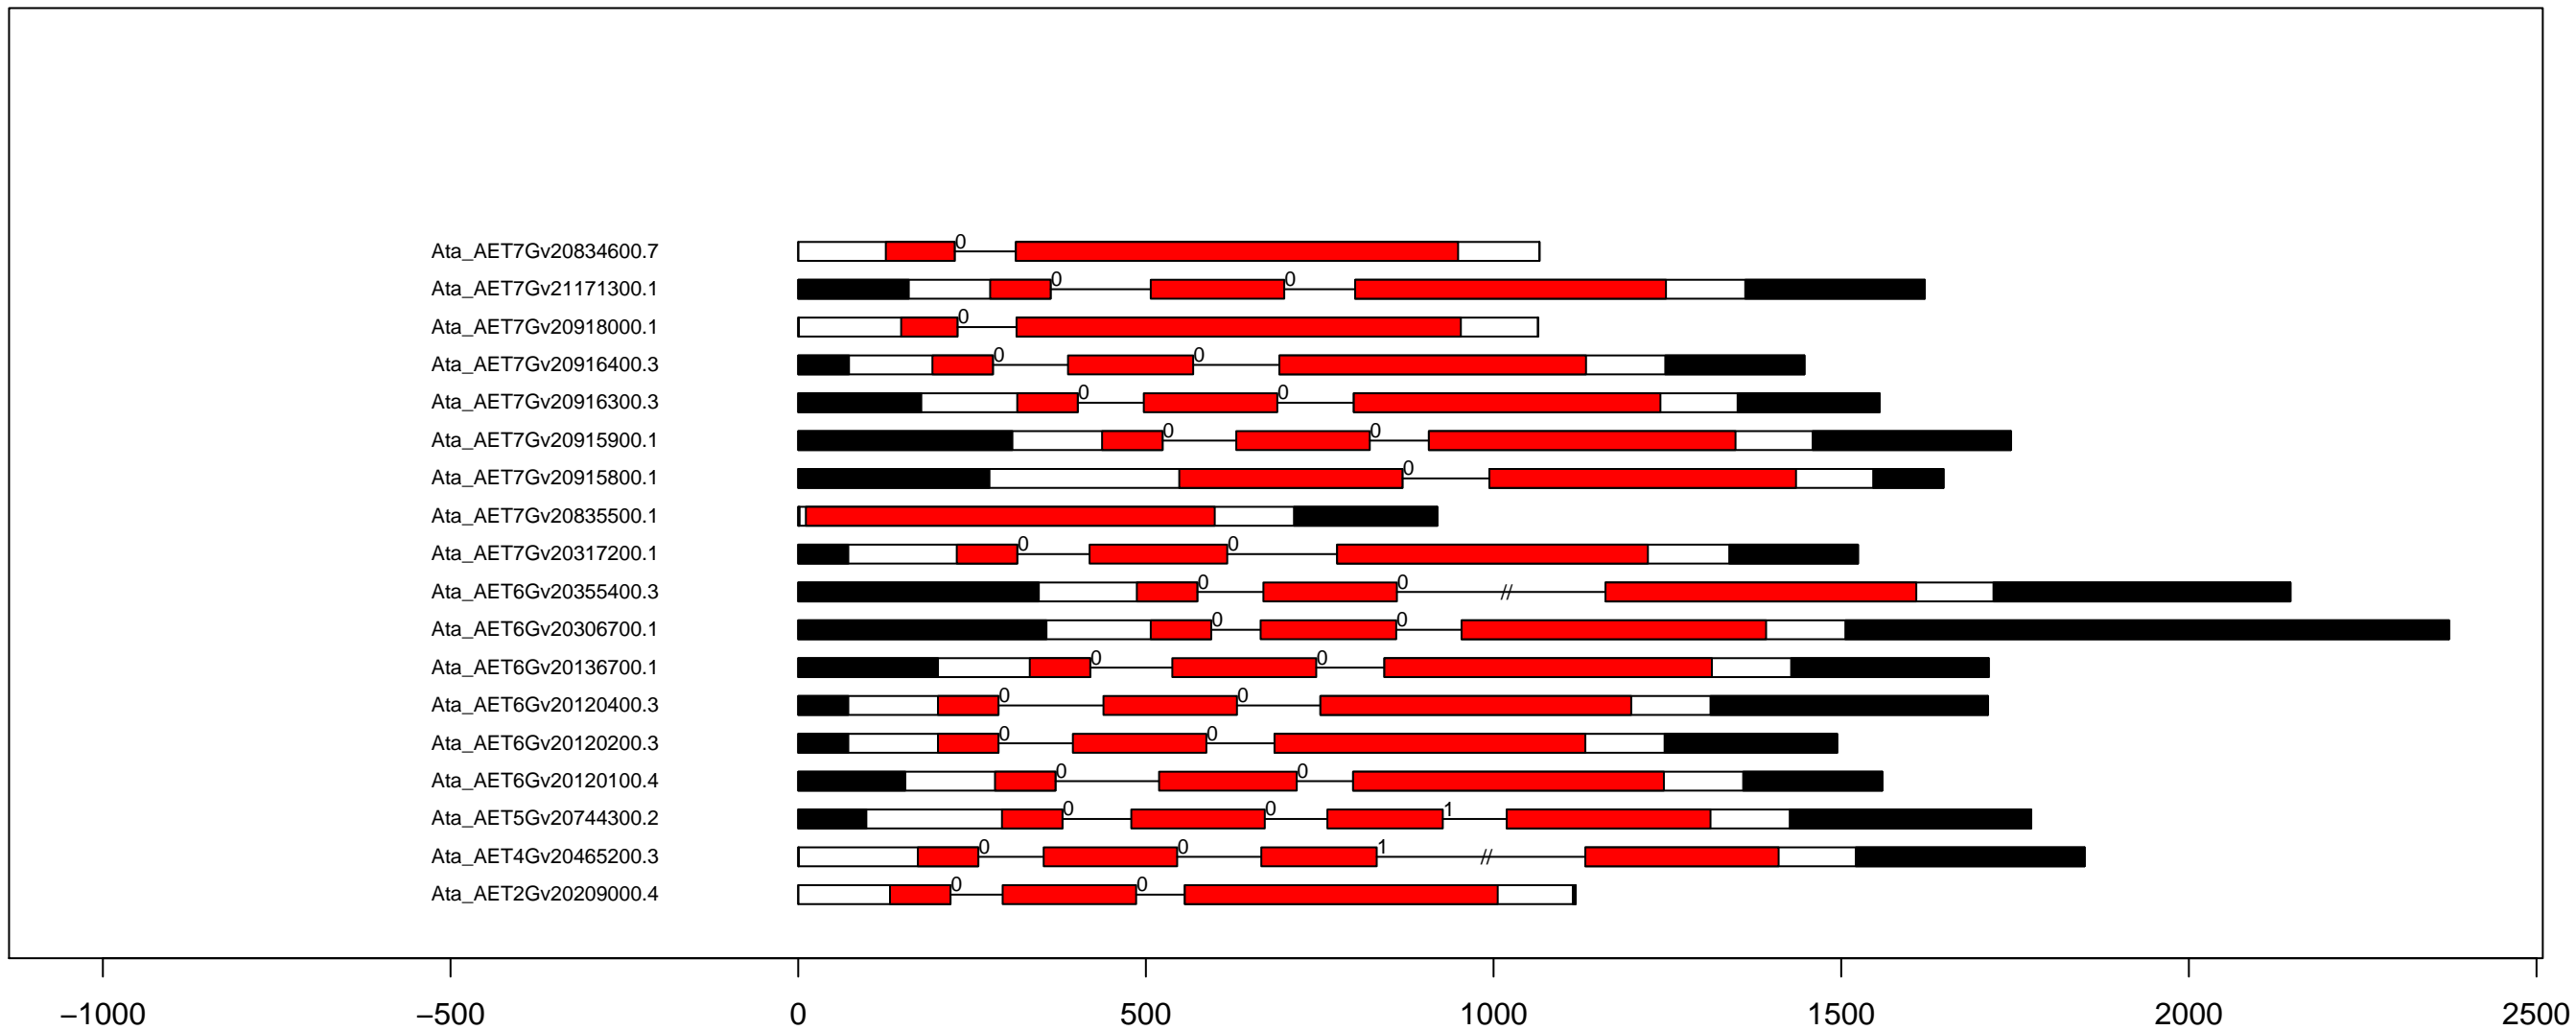



# A.ta class III peroxidase XVII subfamily exon-intron and prx domain diagram (all)

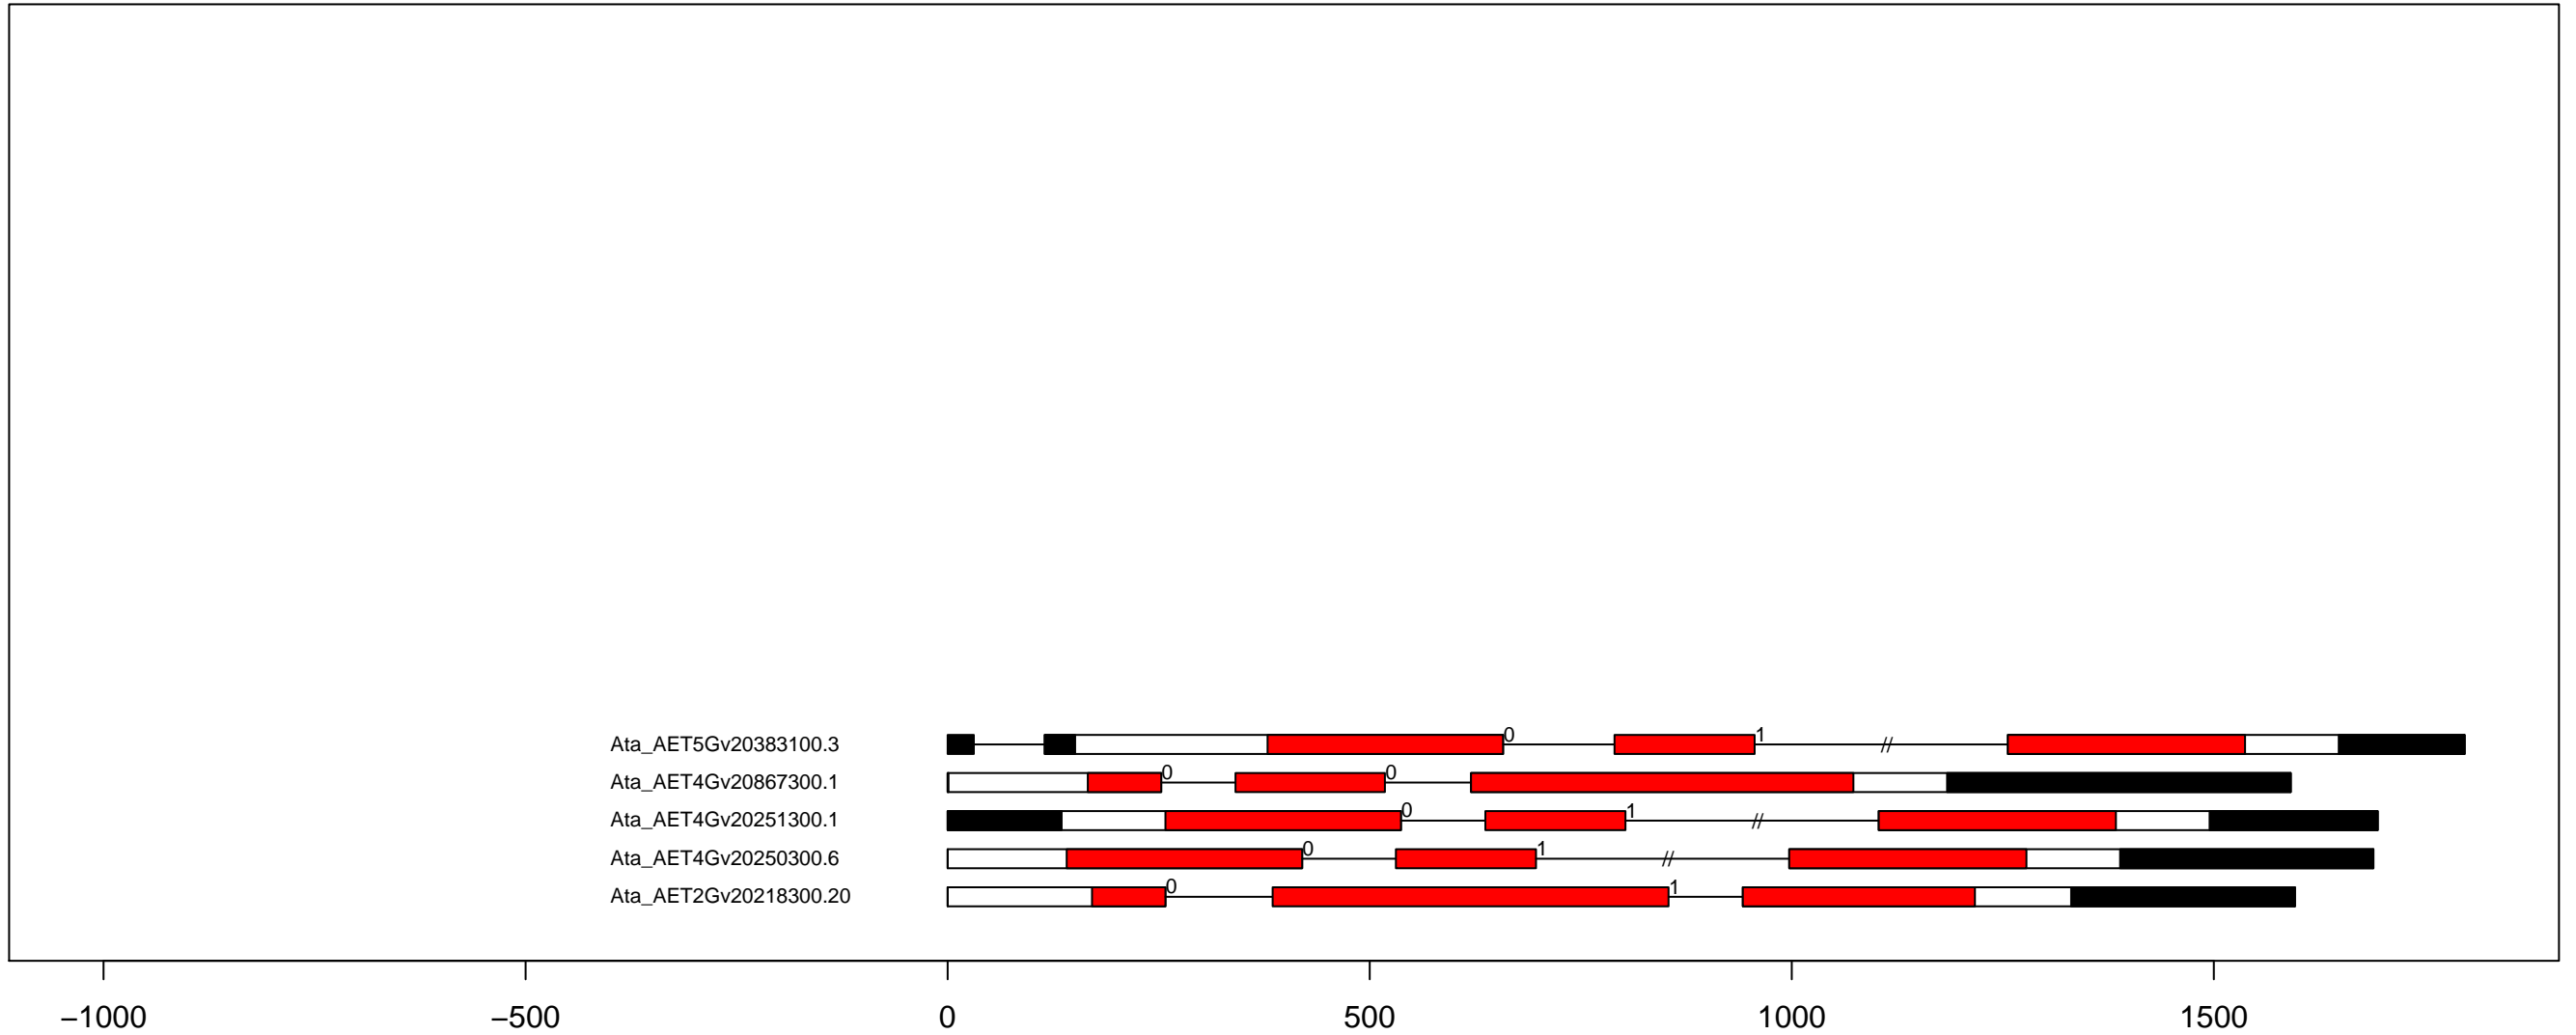

# A.ta class III peroxidase XVIII subfamily exon-intron and prx domain diagram (all)

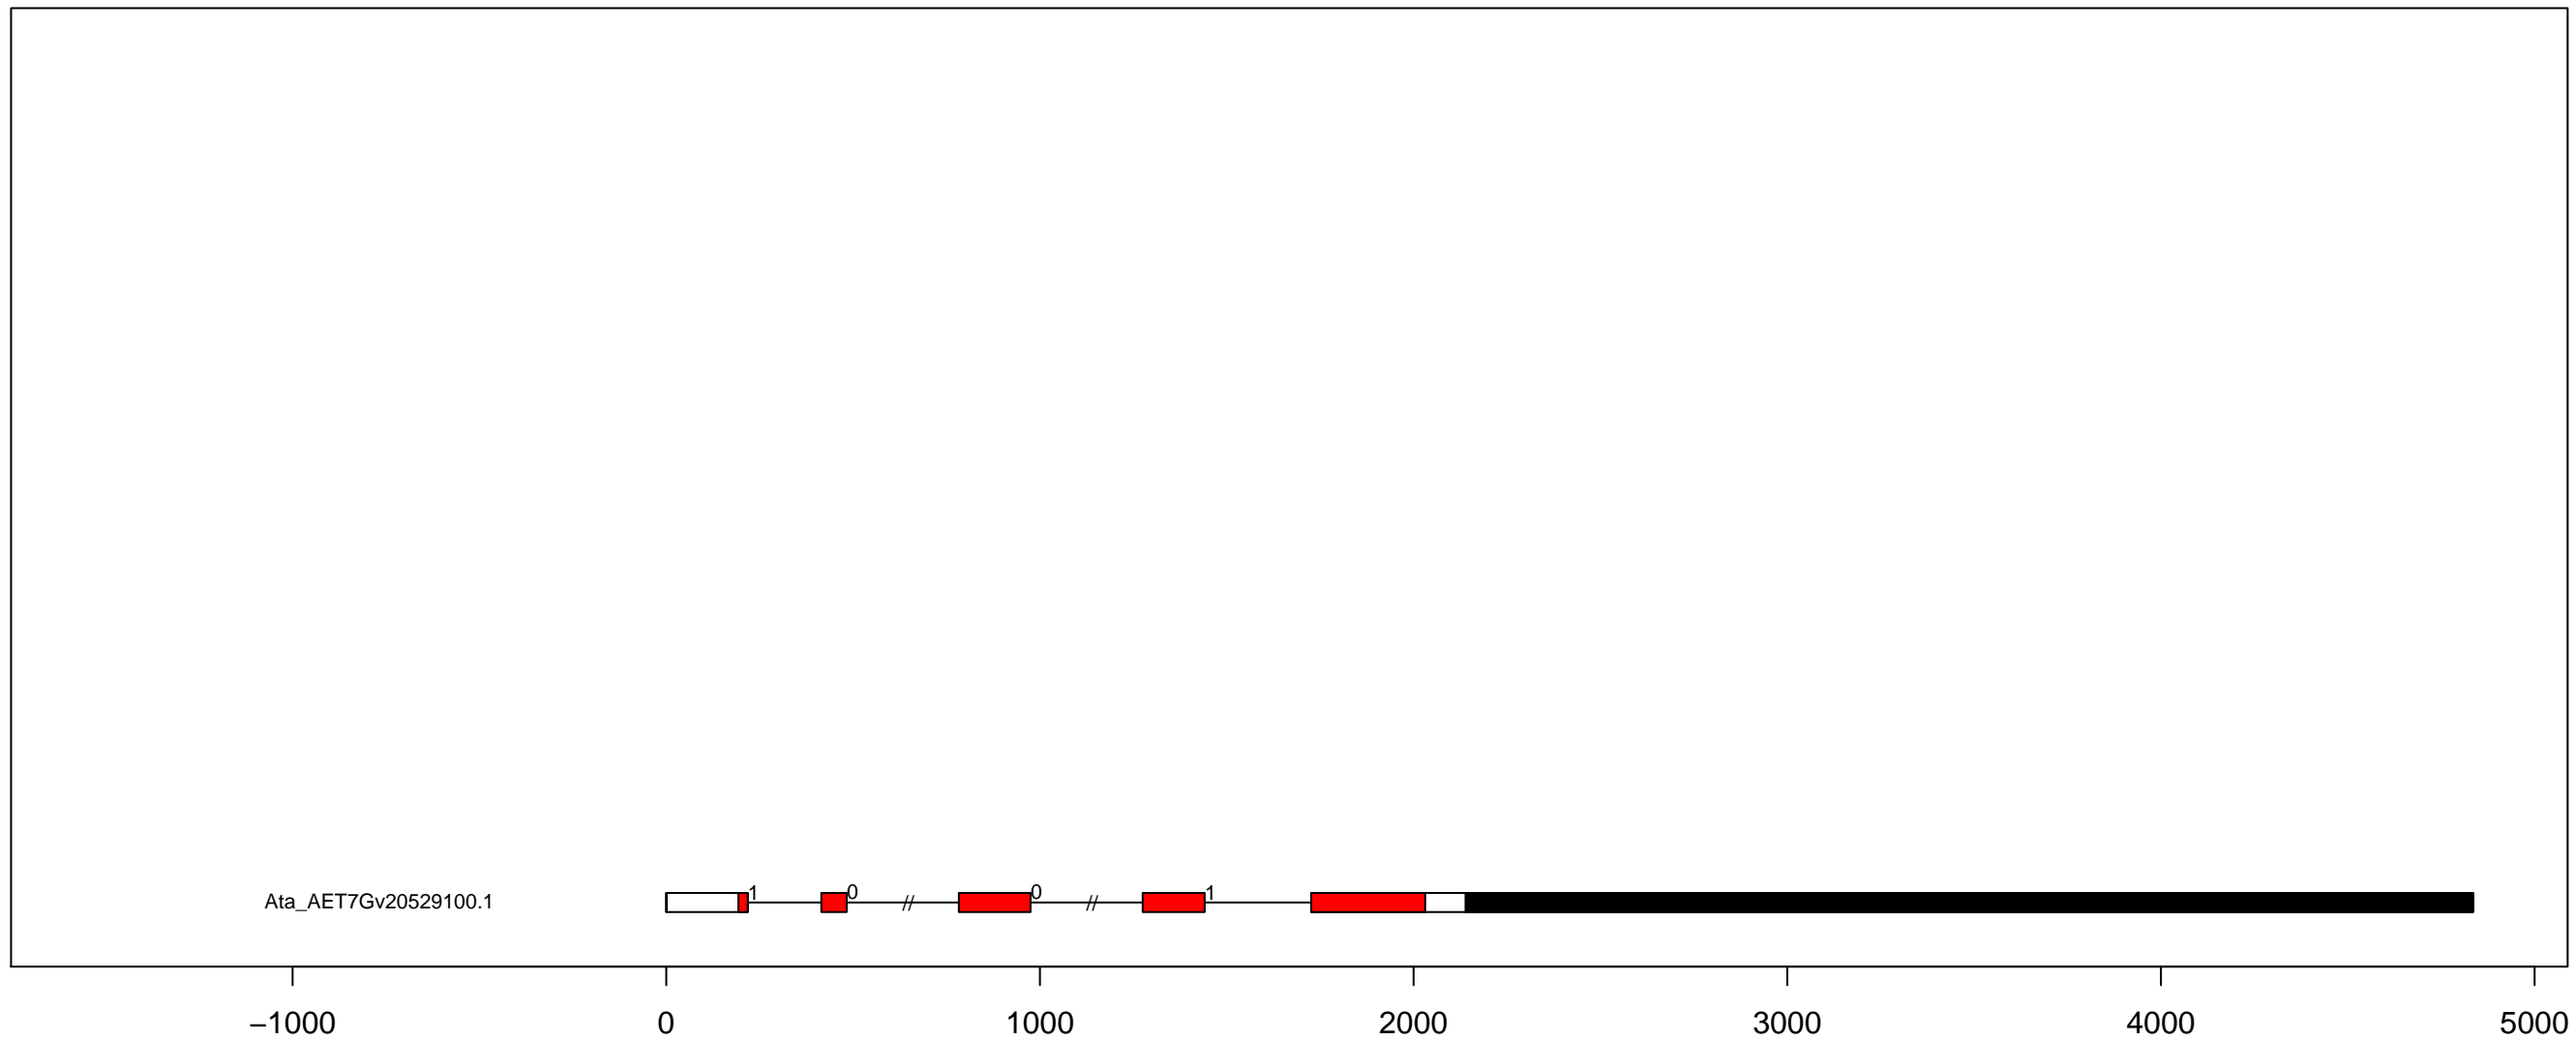

**A.ta class III peroxidase unclear\_classifications subfamily exon-intron and prx domain diagram (all)**

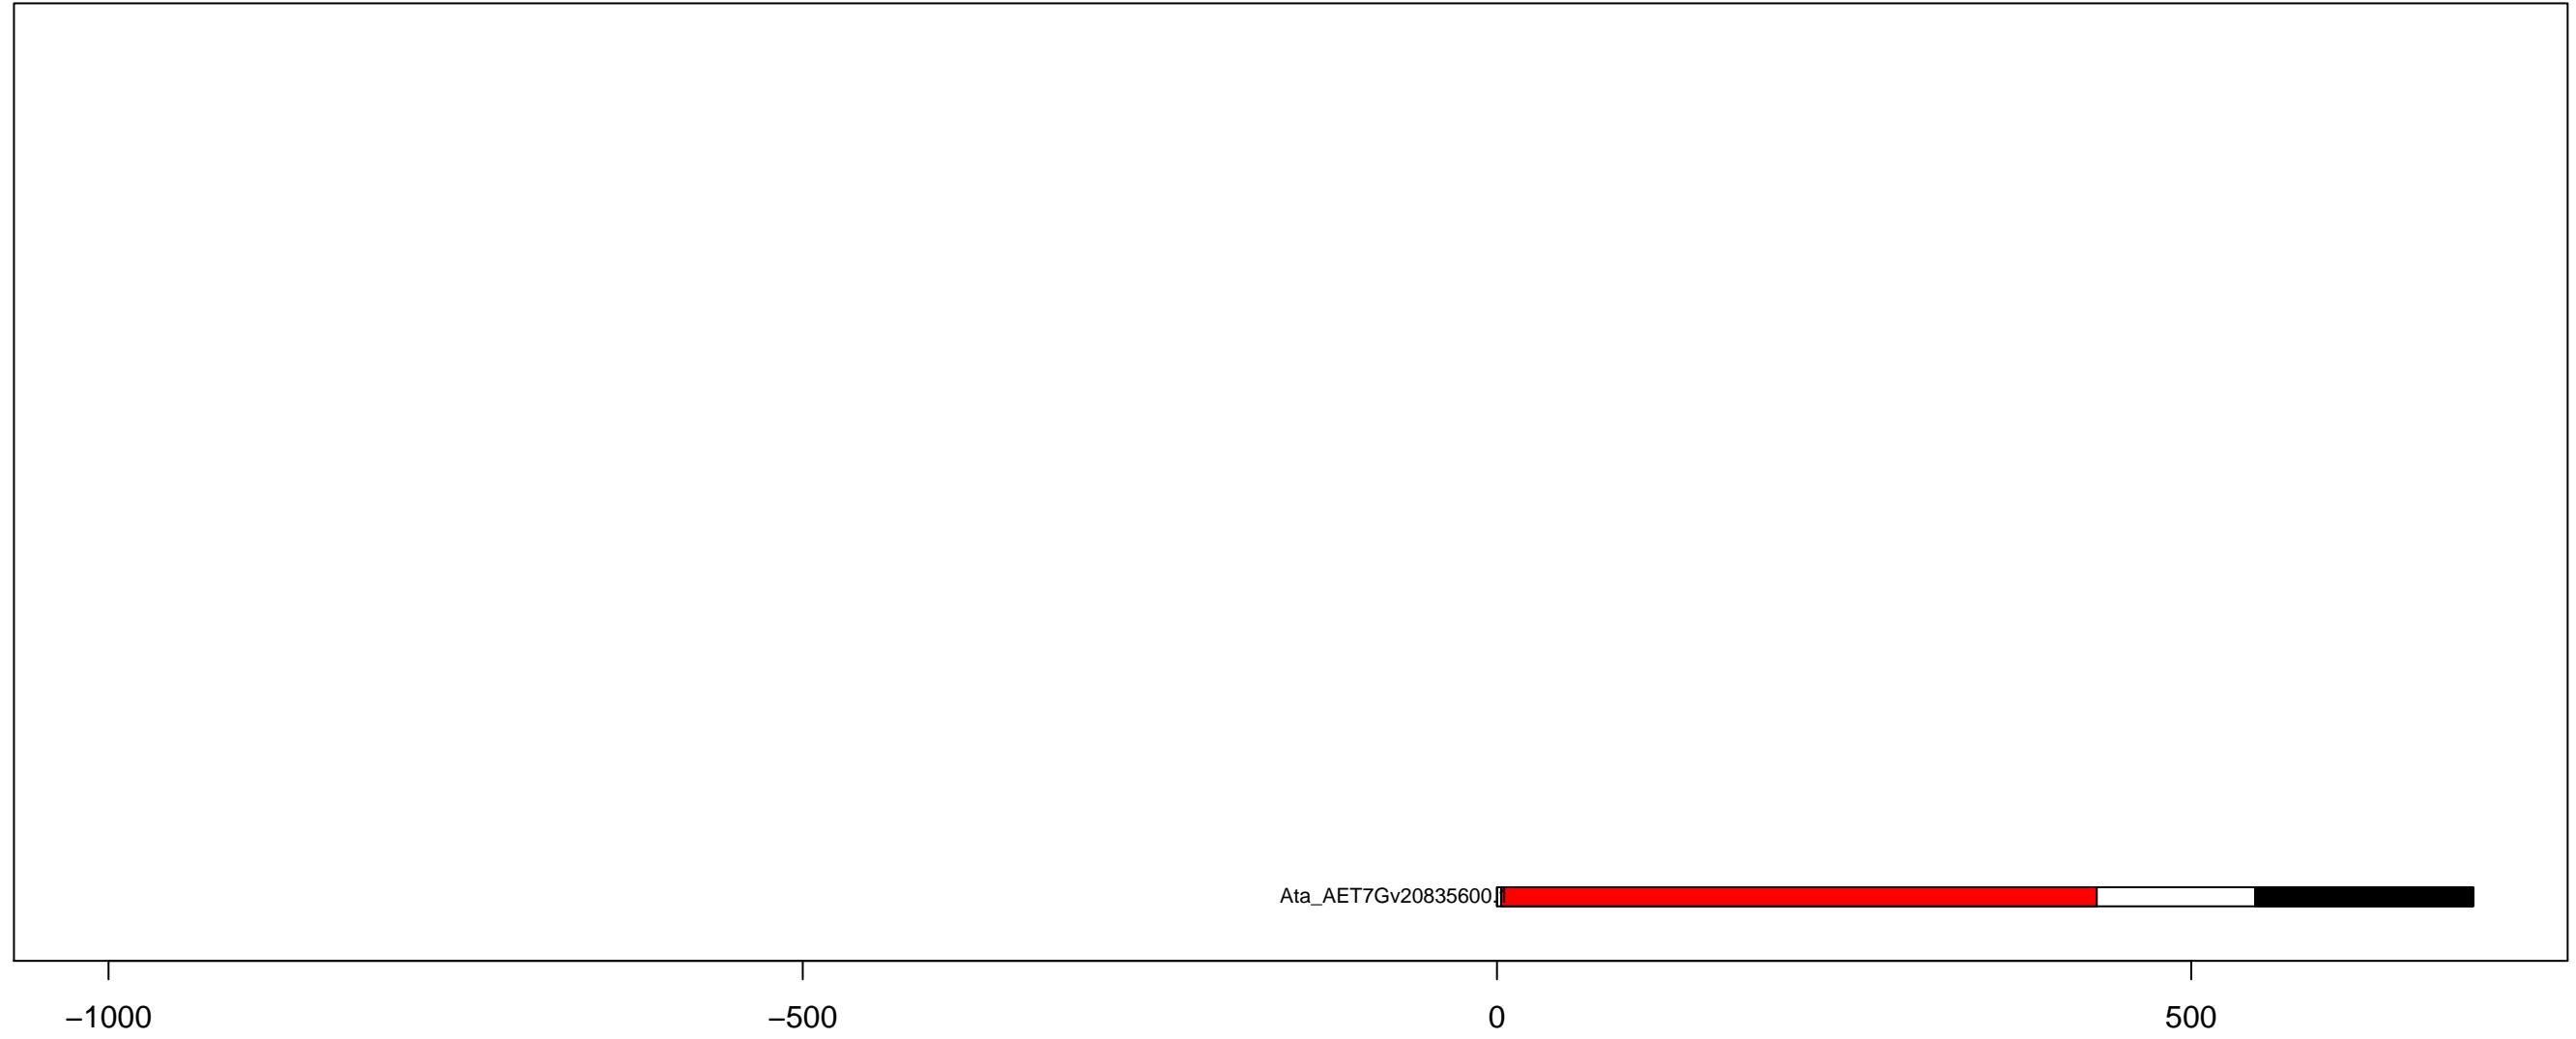

### B.di class III peroxidase I subfamily exon-intron and prx domain diagram (part 1)

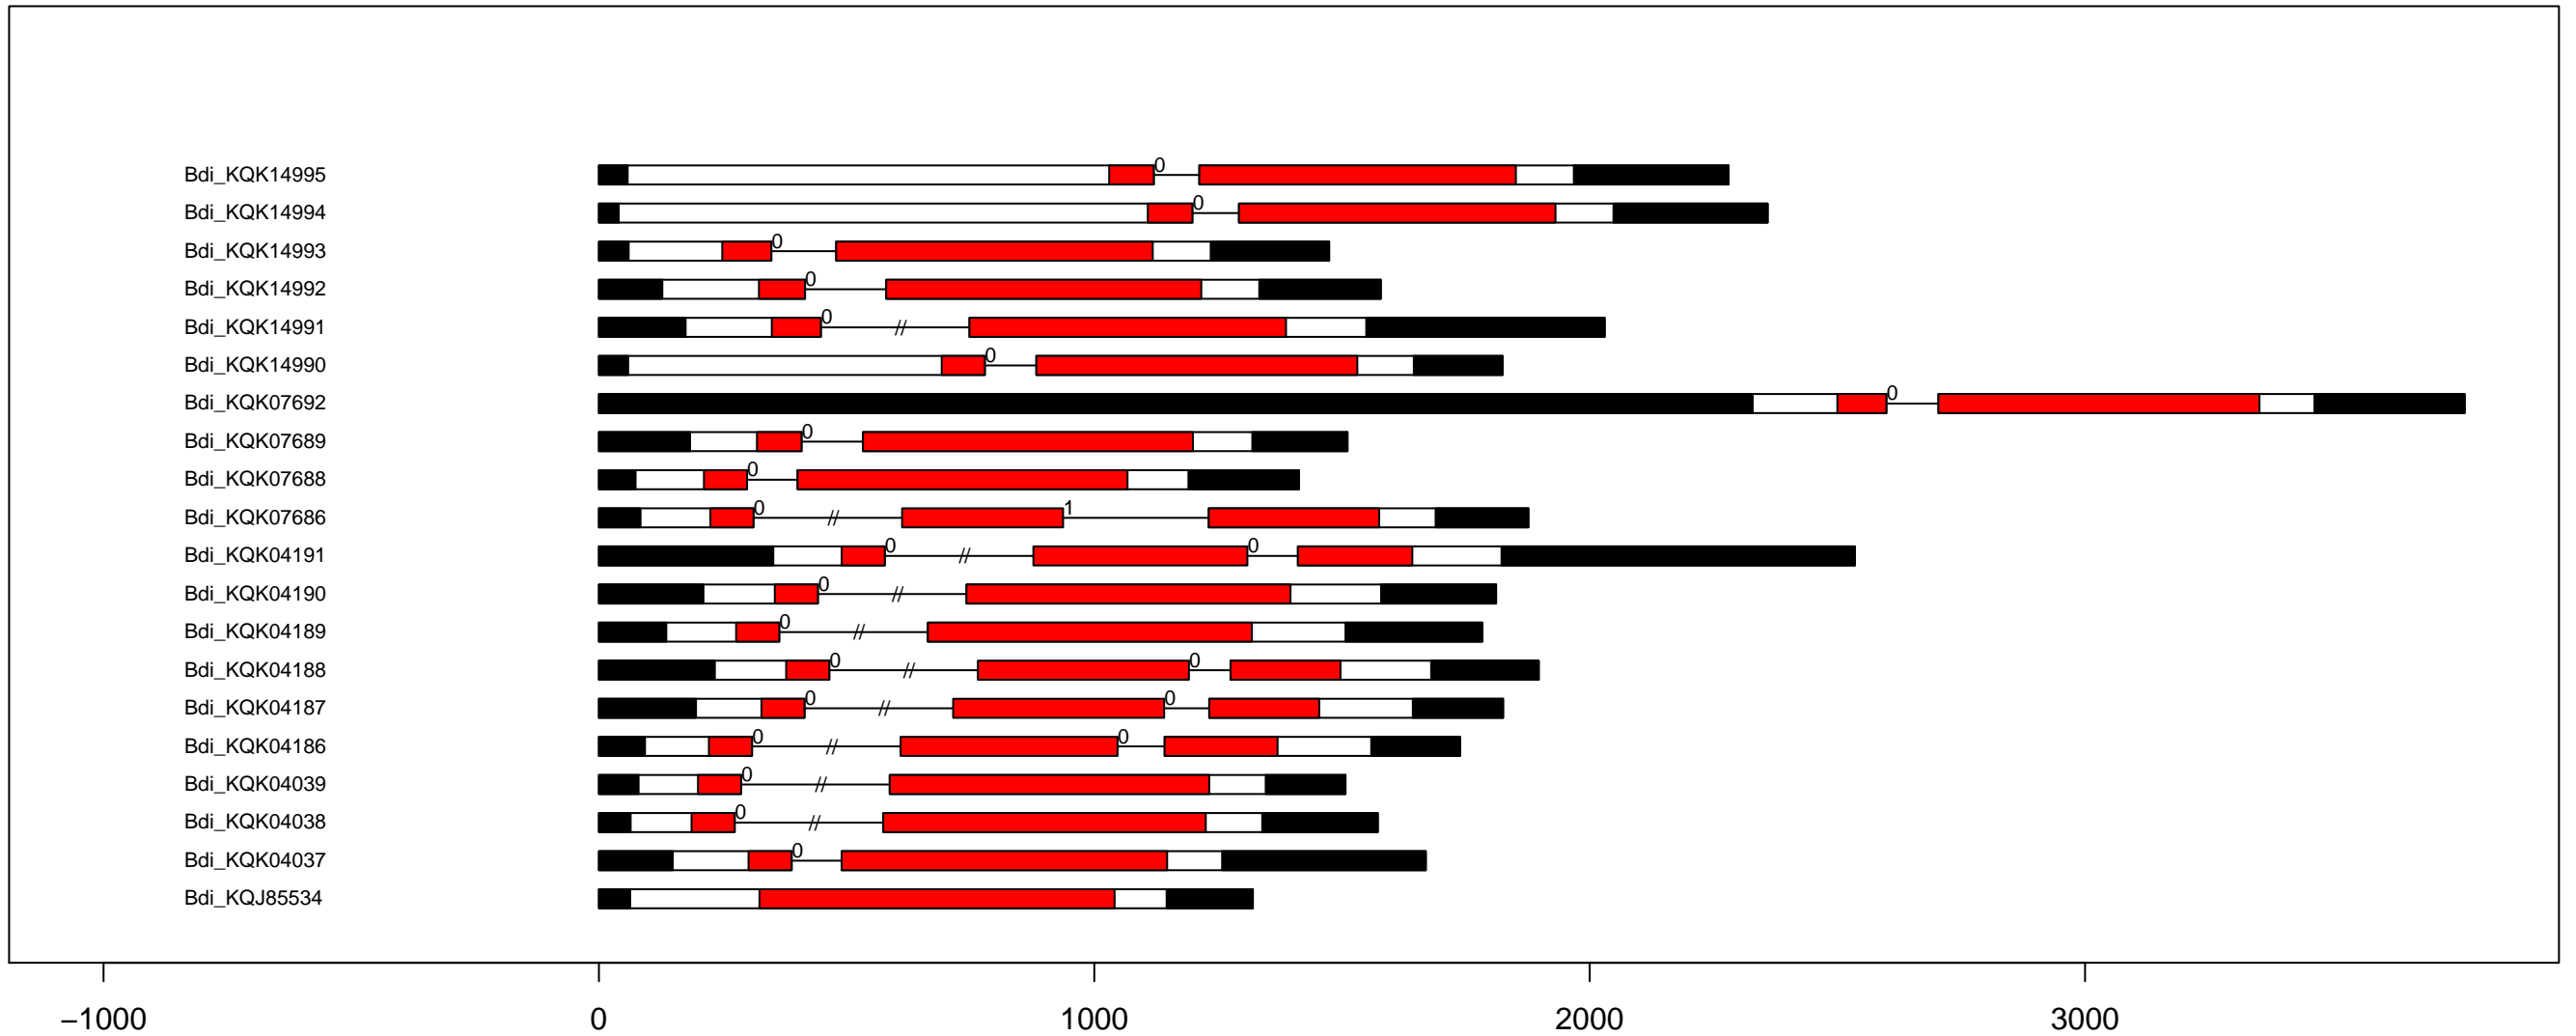

# B.di class III peroxidase I subfamily exon-intron and prx domain diagram (part 2)

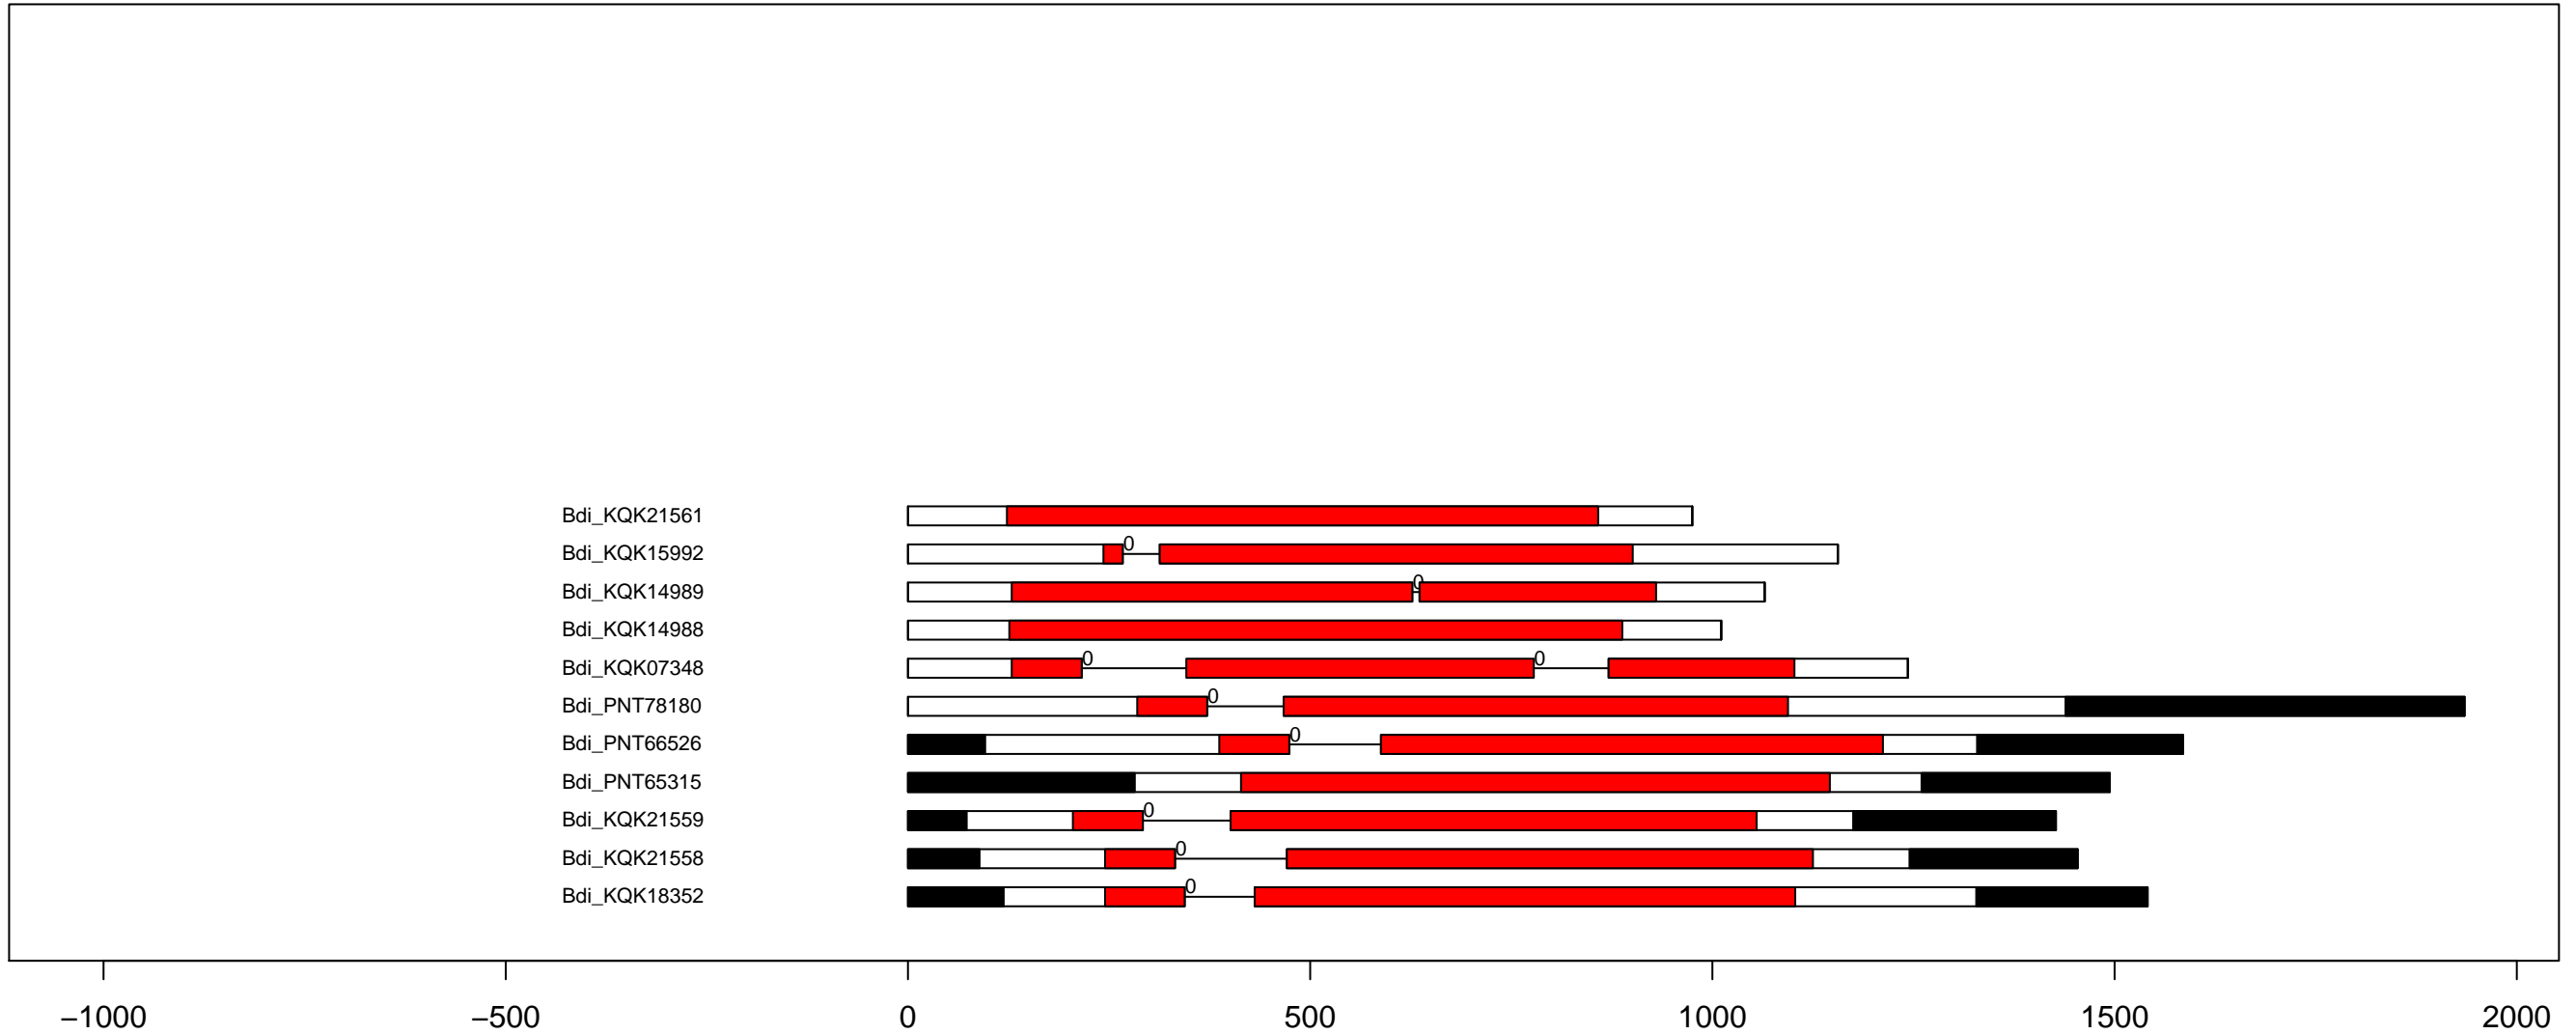

### B.di class III peroxidase II subfamily exon-intron and prx domain diagram (all)

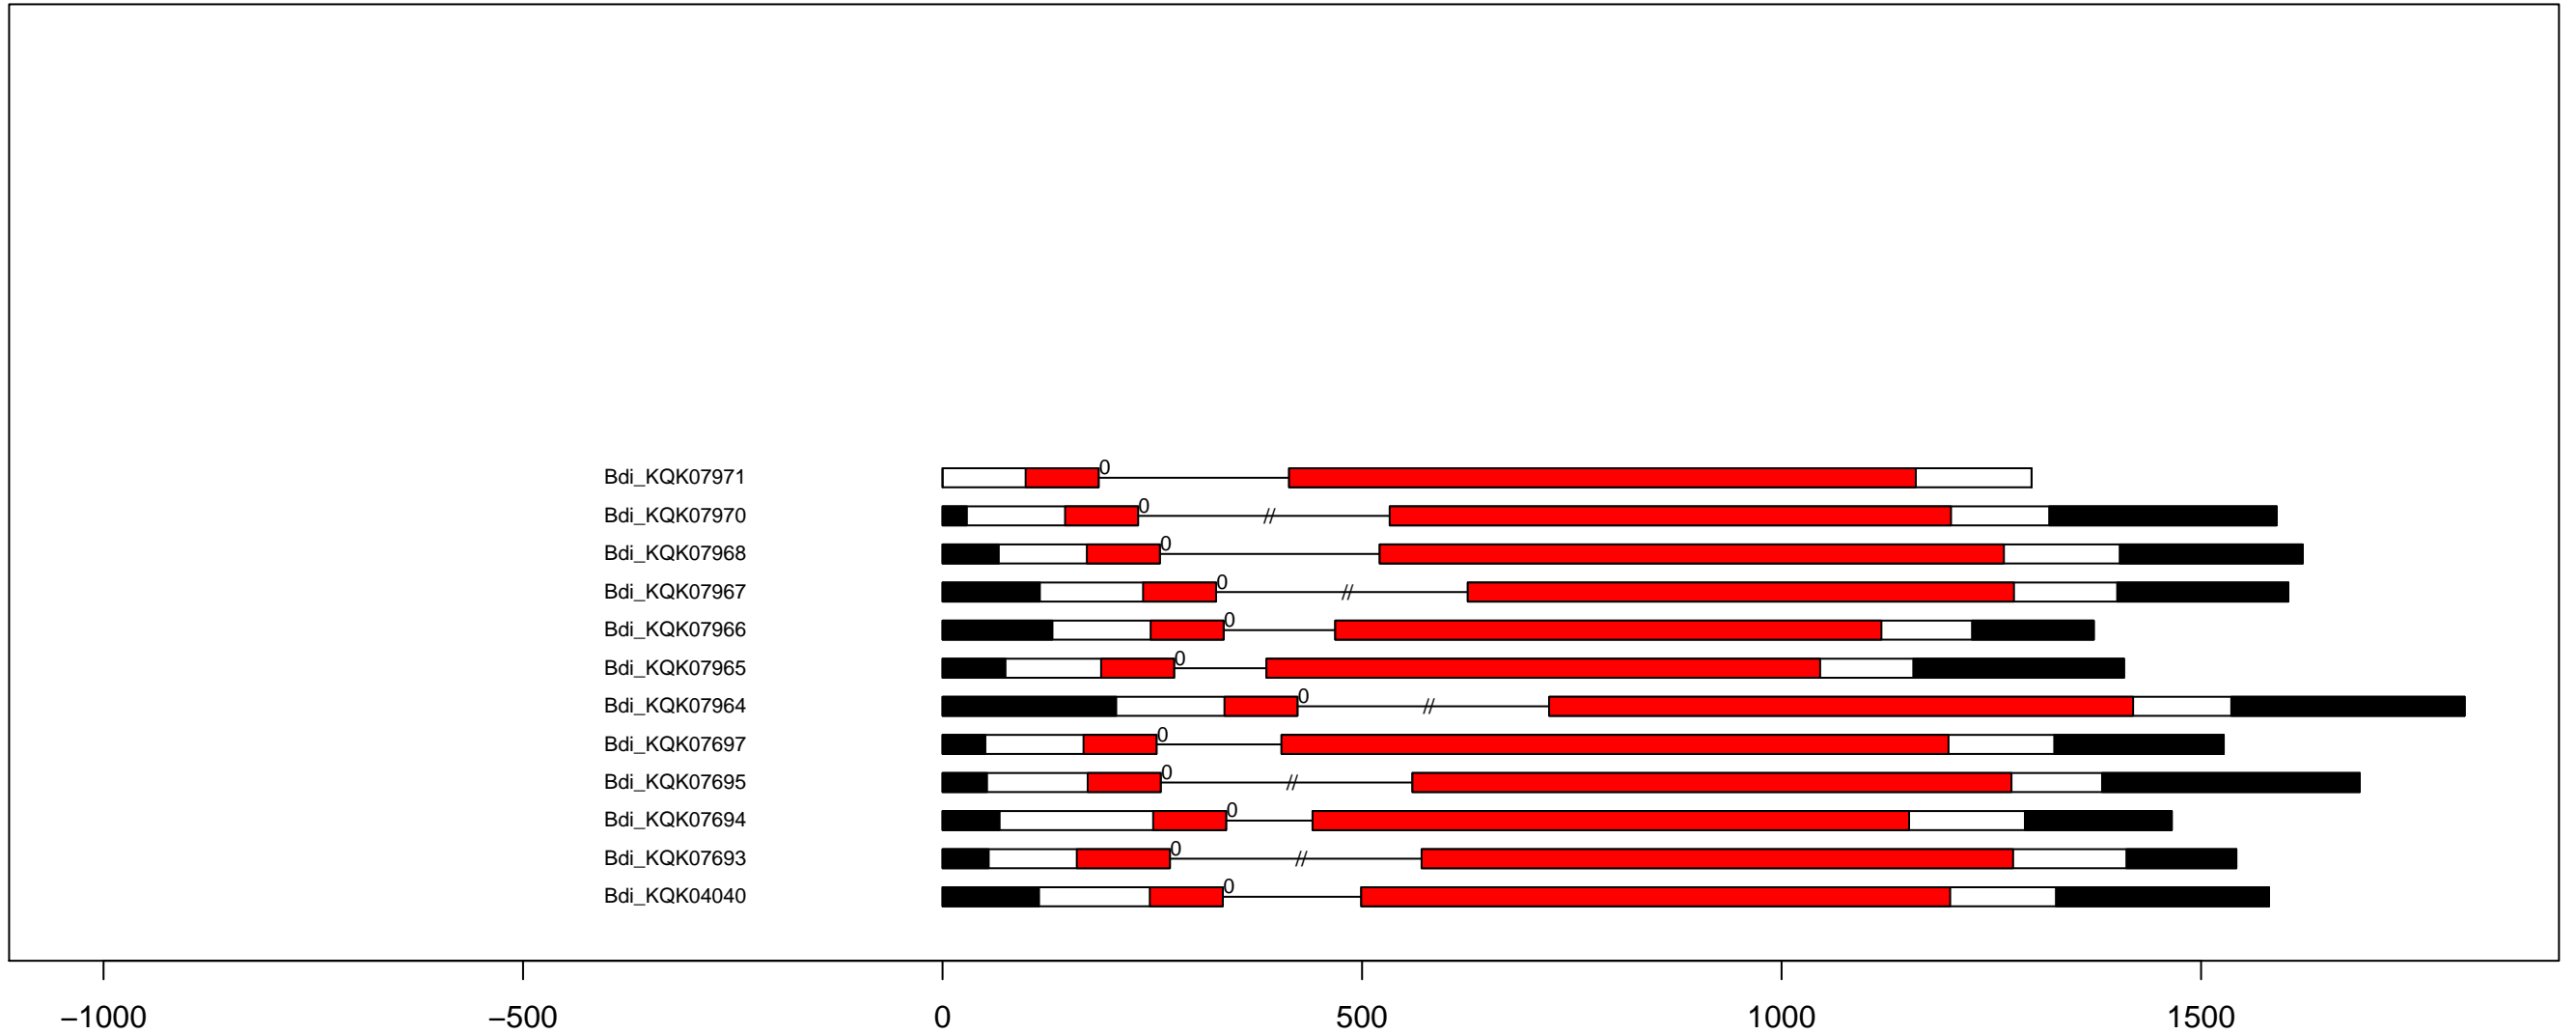

# B.di class III peroxidase III subfamily exon-intron and prx domain diagram (all)

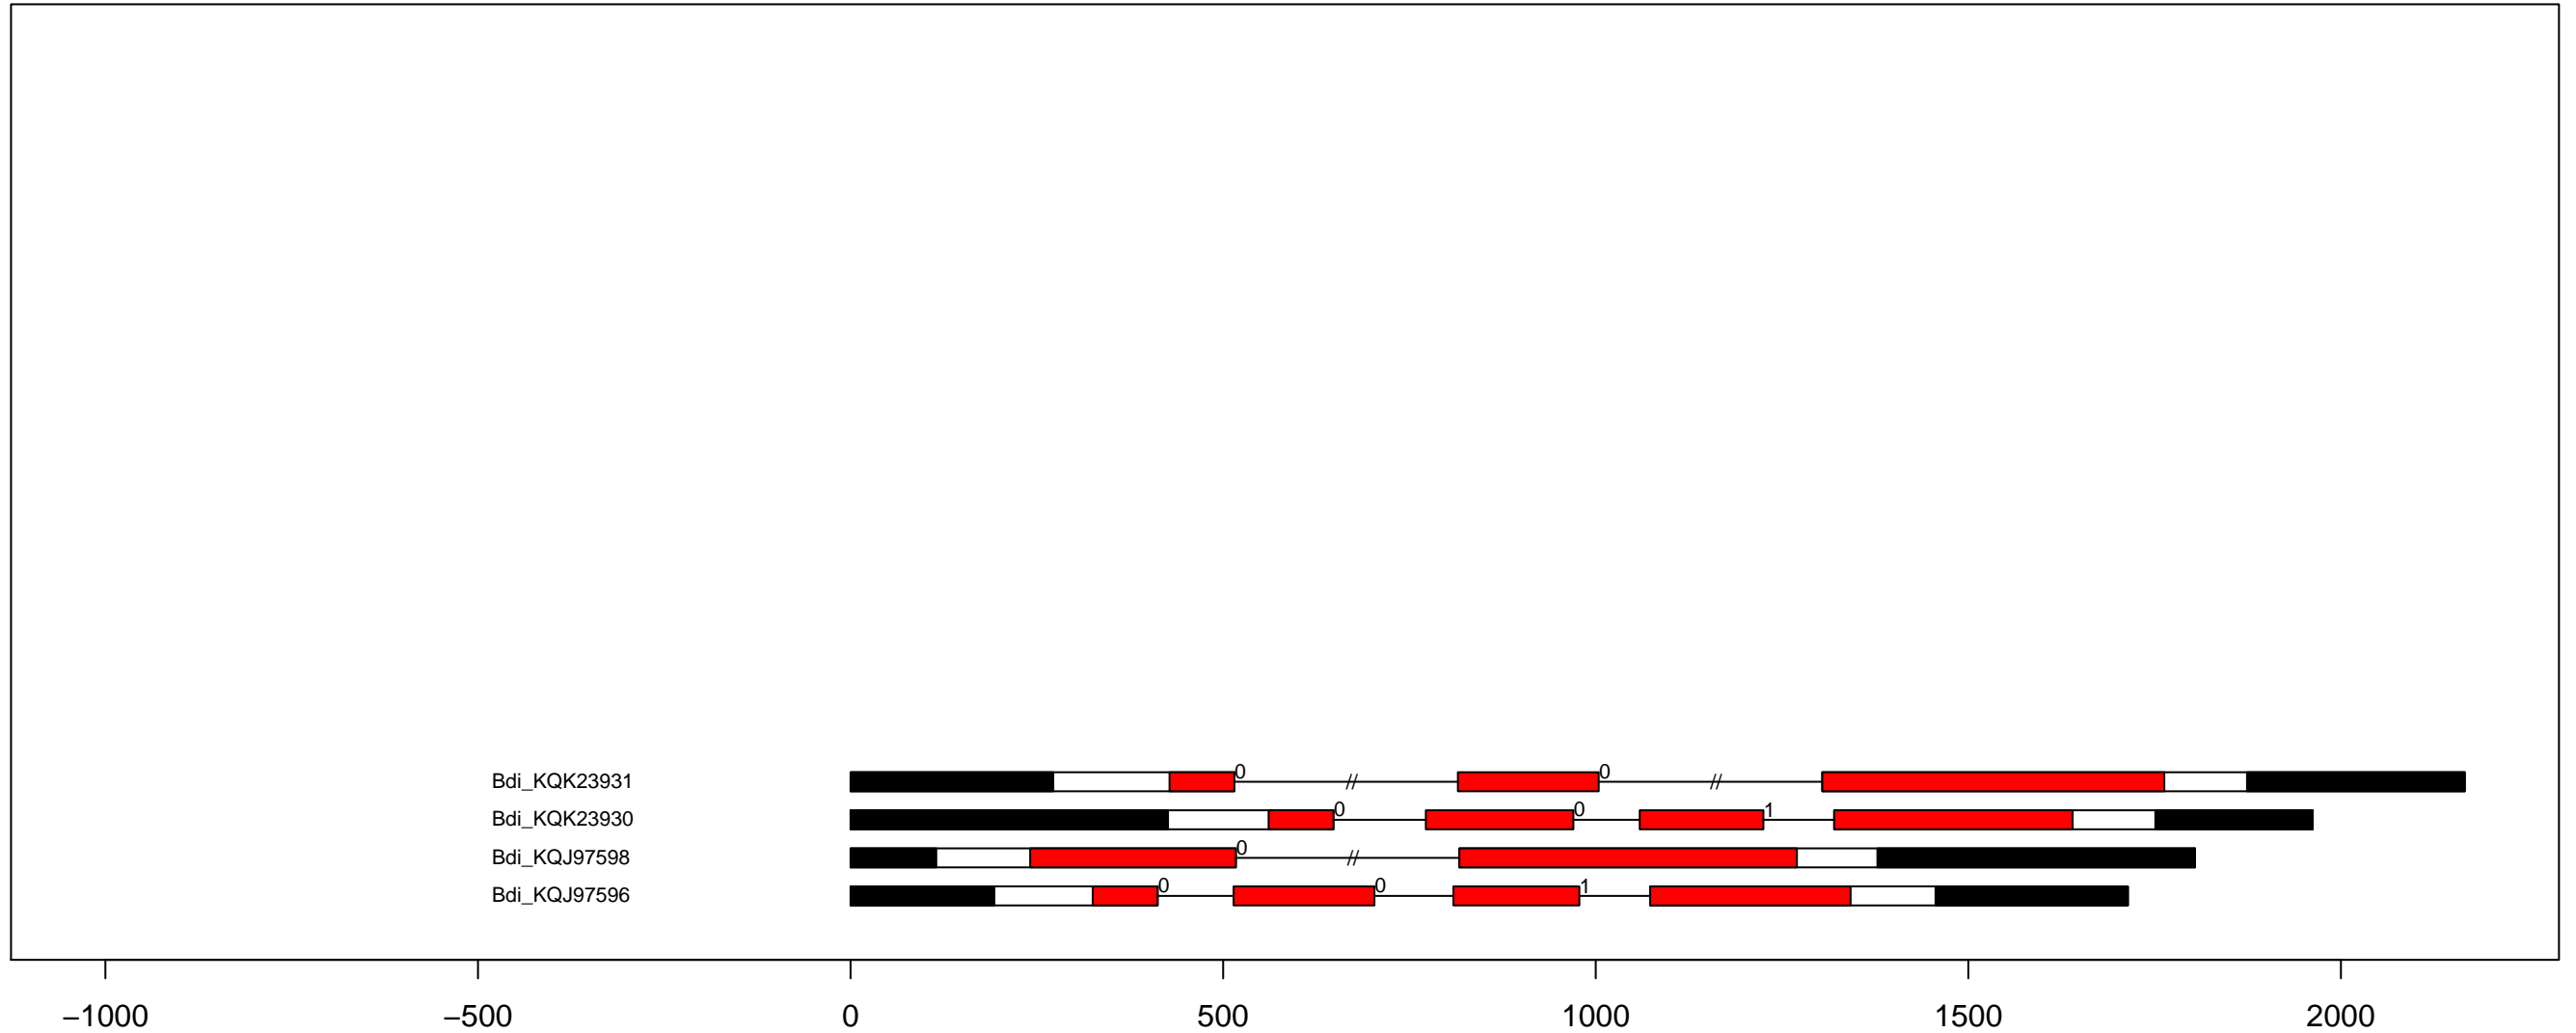

### B.di class III peroxidase V subfamily exon-intron and prx domain diagram (part 1)

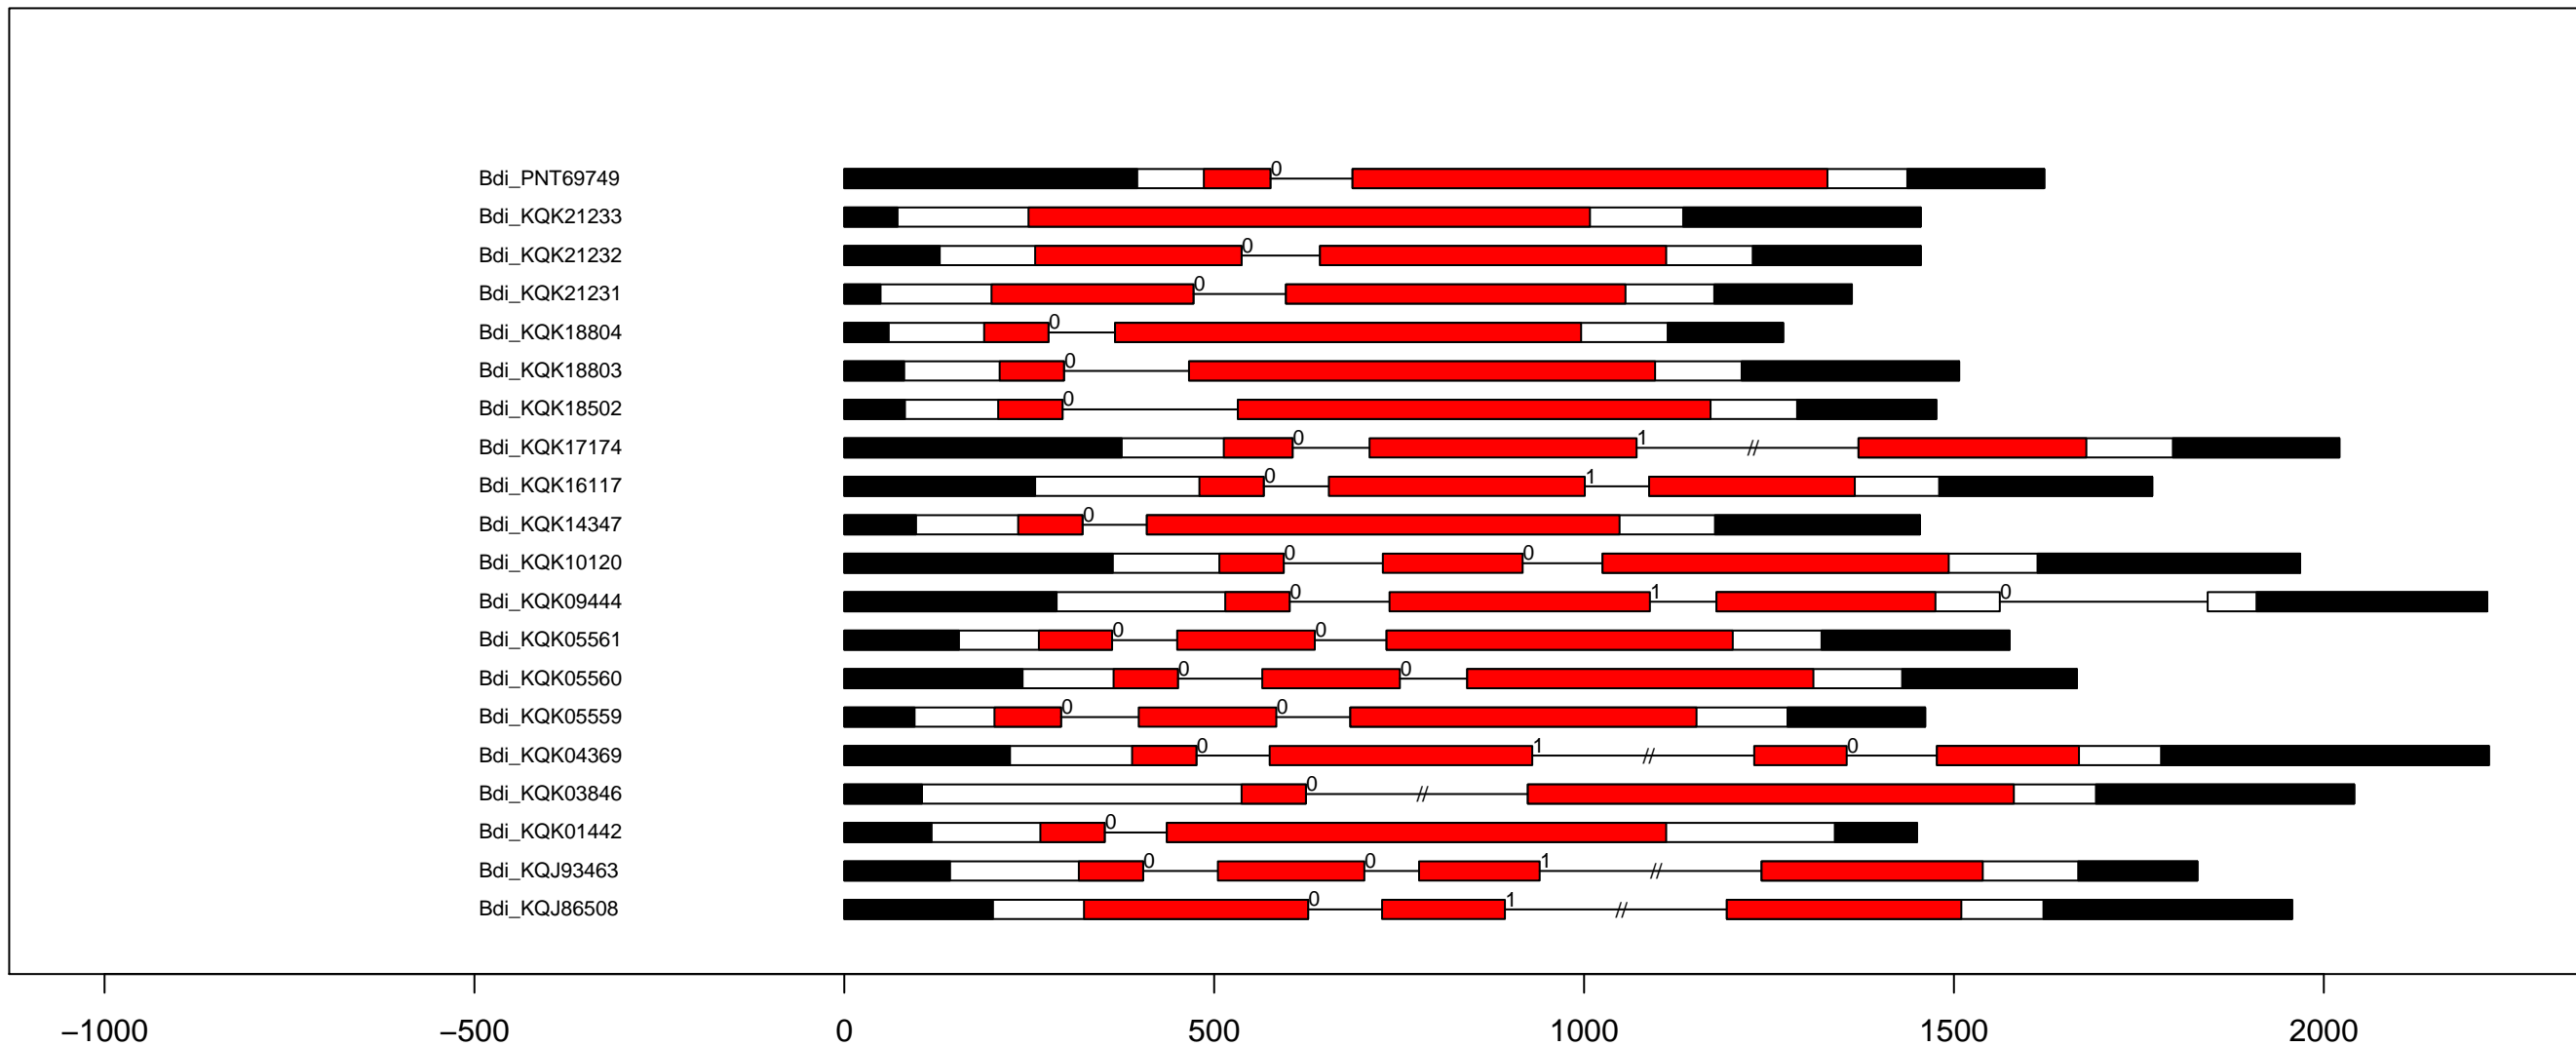



### B.di class III peroxidase V subfamily exon-intron and prx domain diagram (part 2)

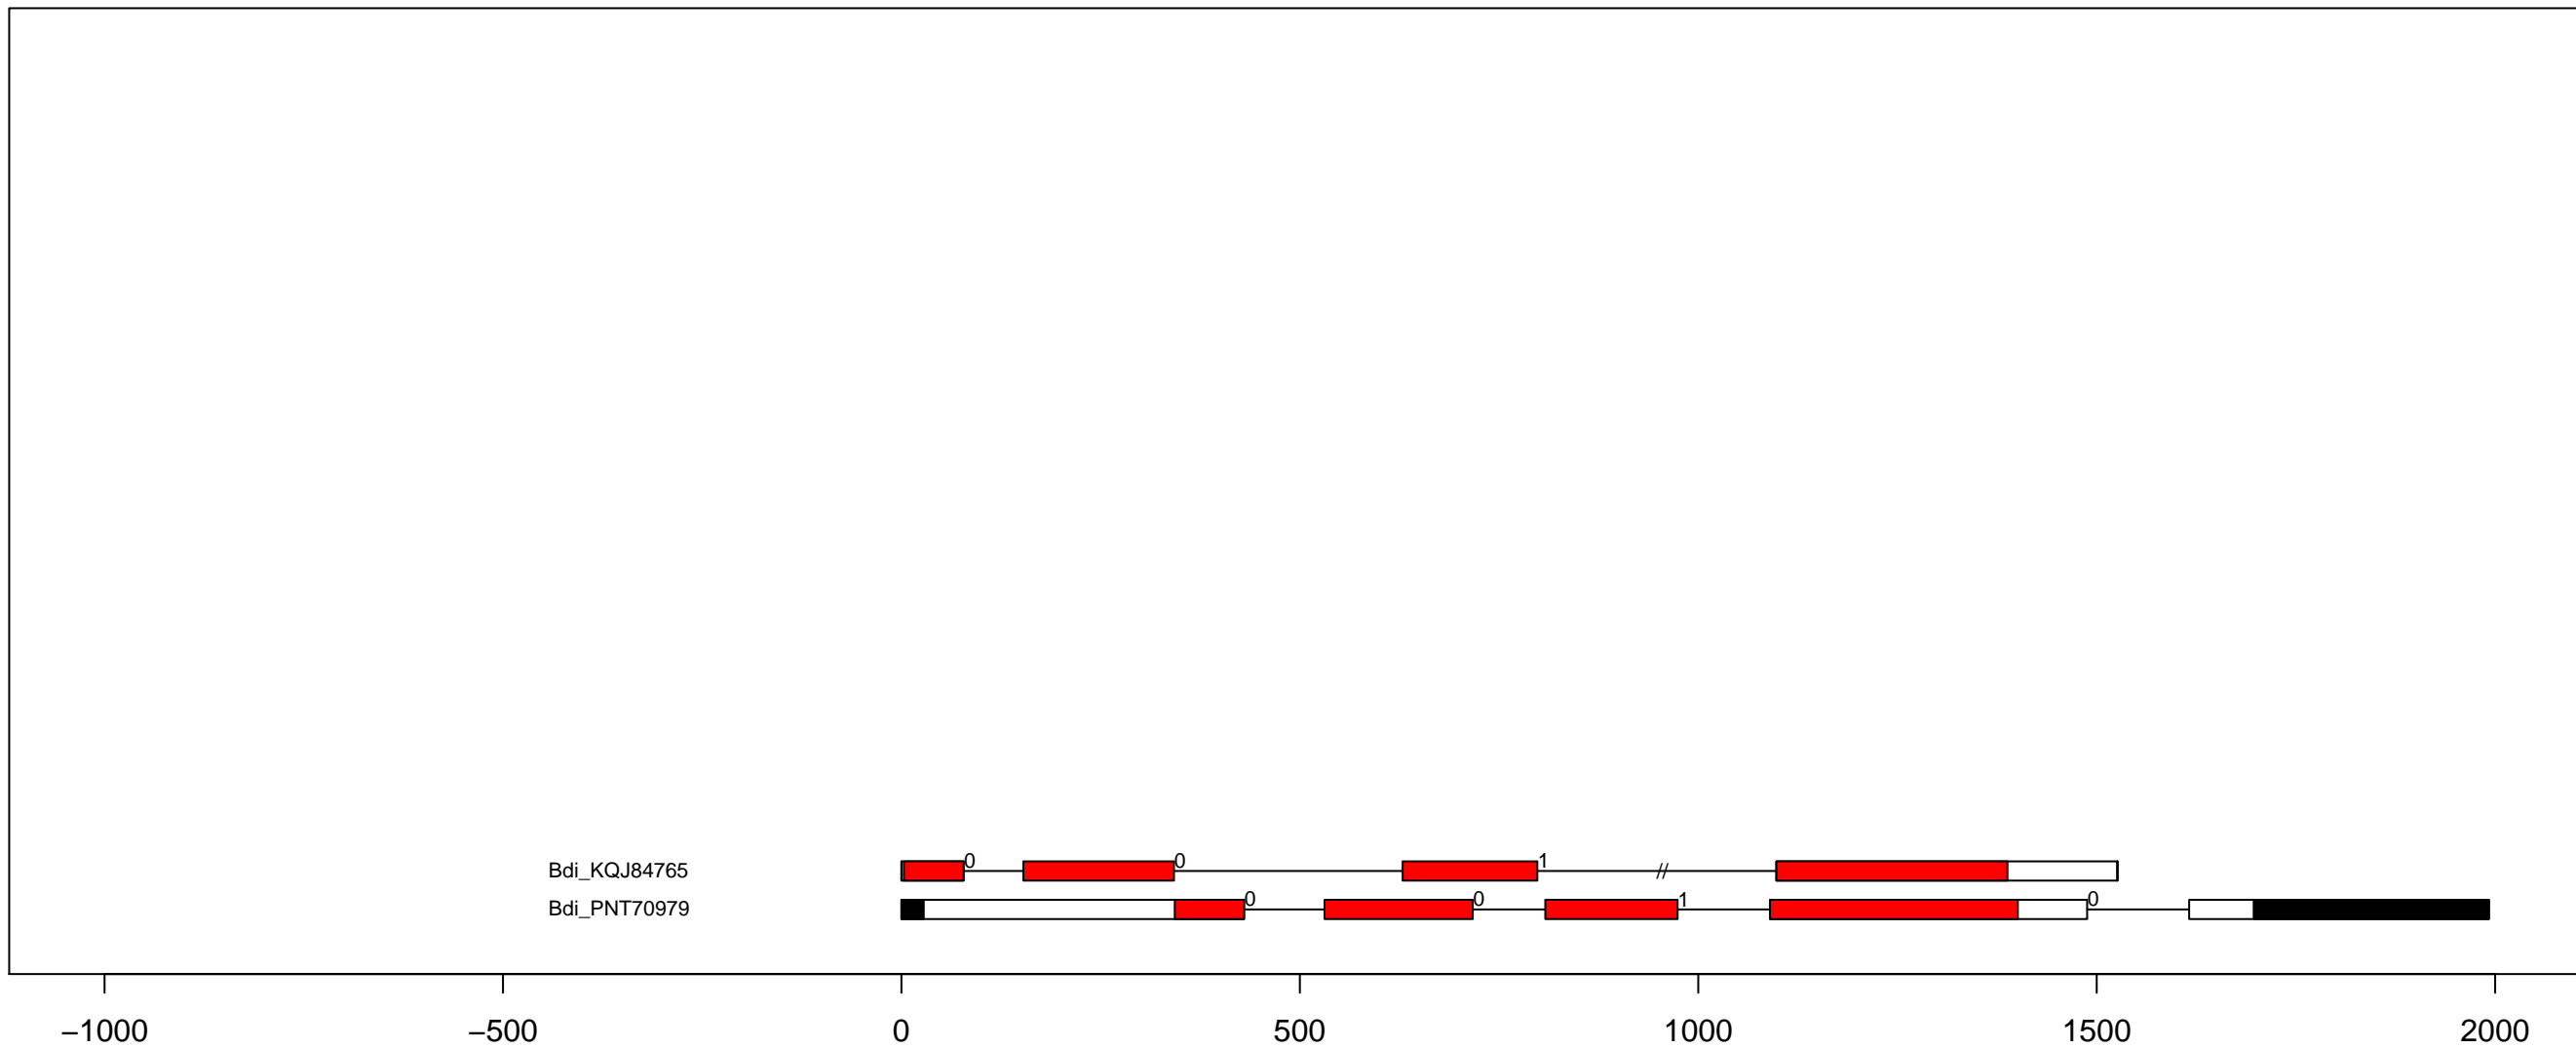

# B.di class III peroxidase VI subfamily exon-intron and prx domain diagram (all)

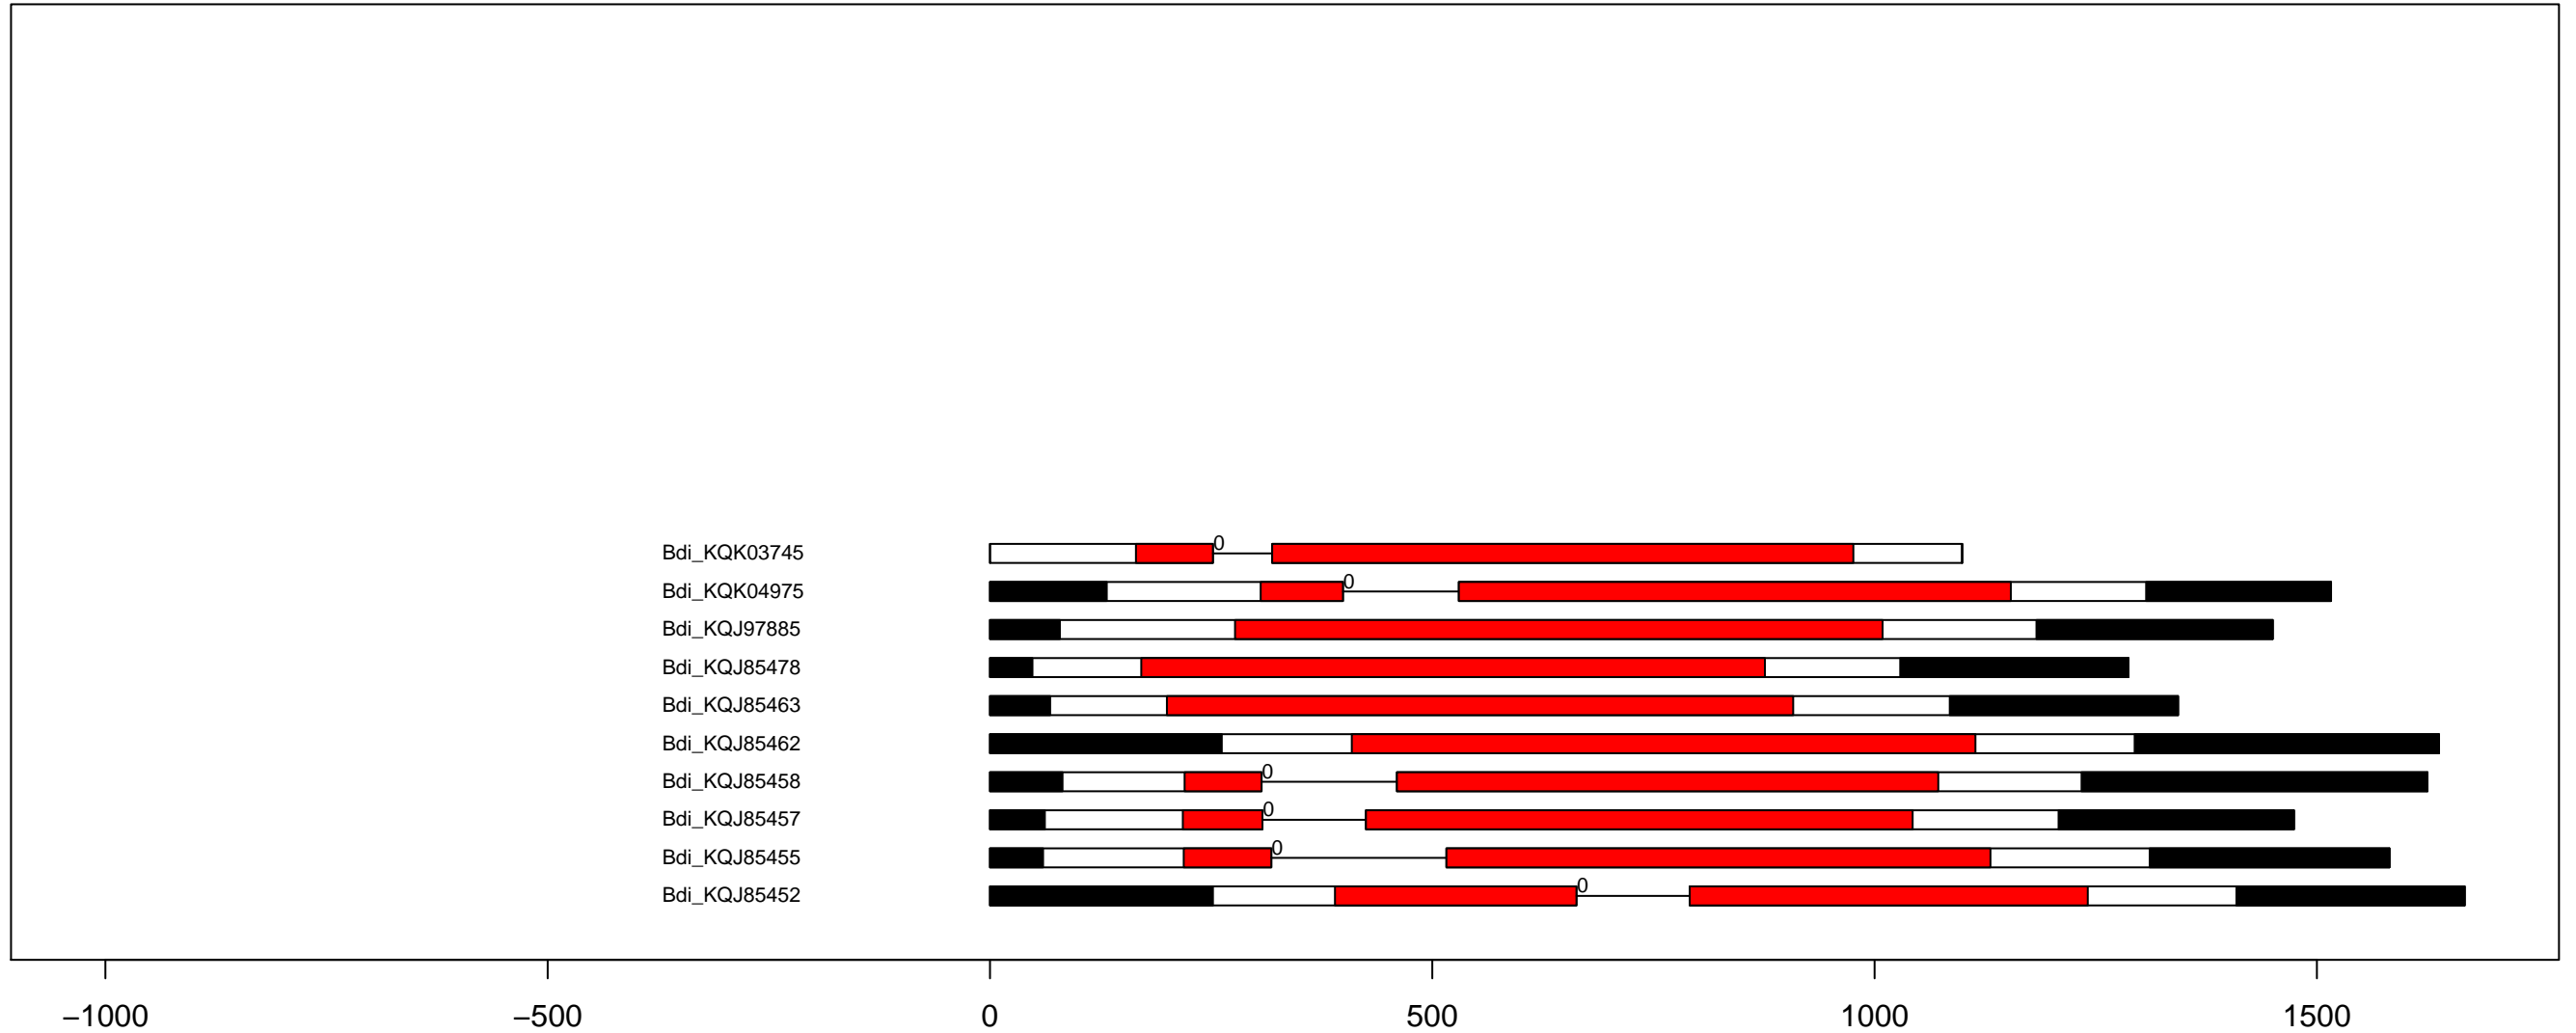

# B.di class III peroxidase VII subfamily exon-intron and prx domain diagram (all)

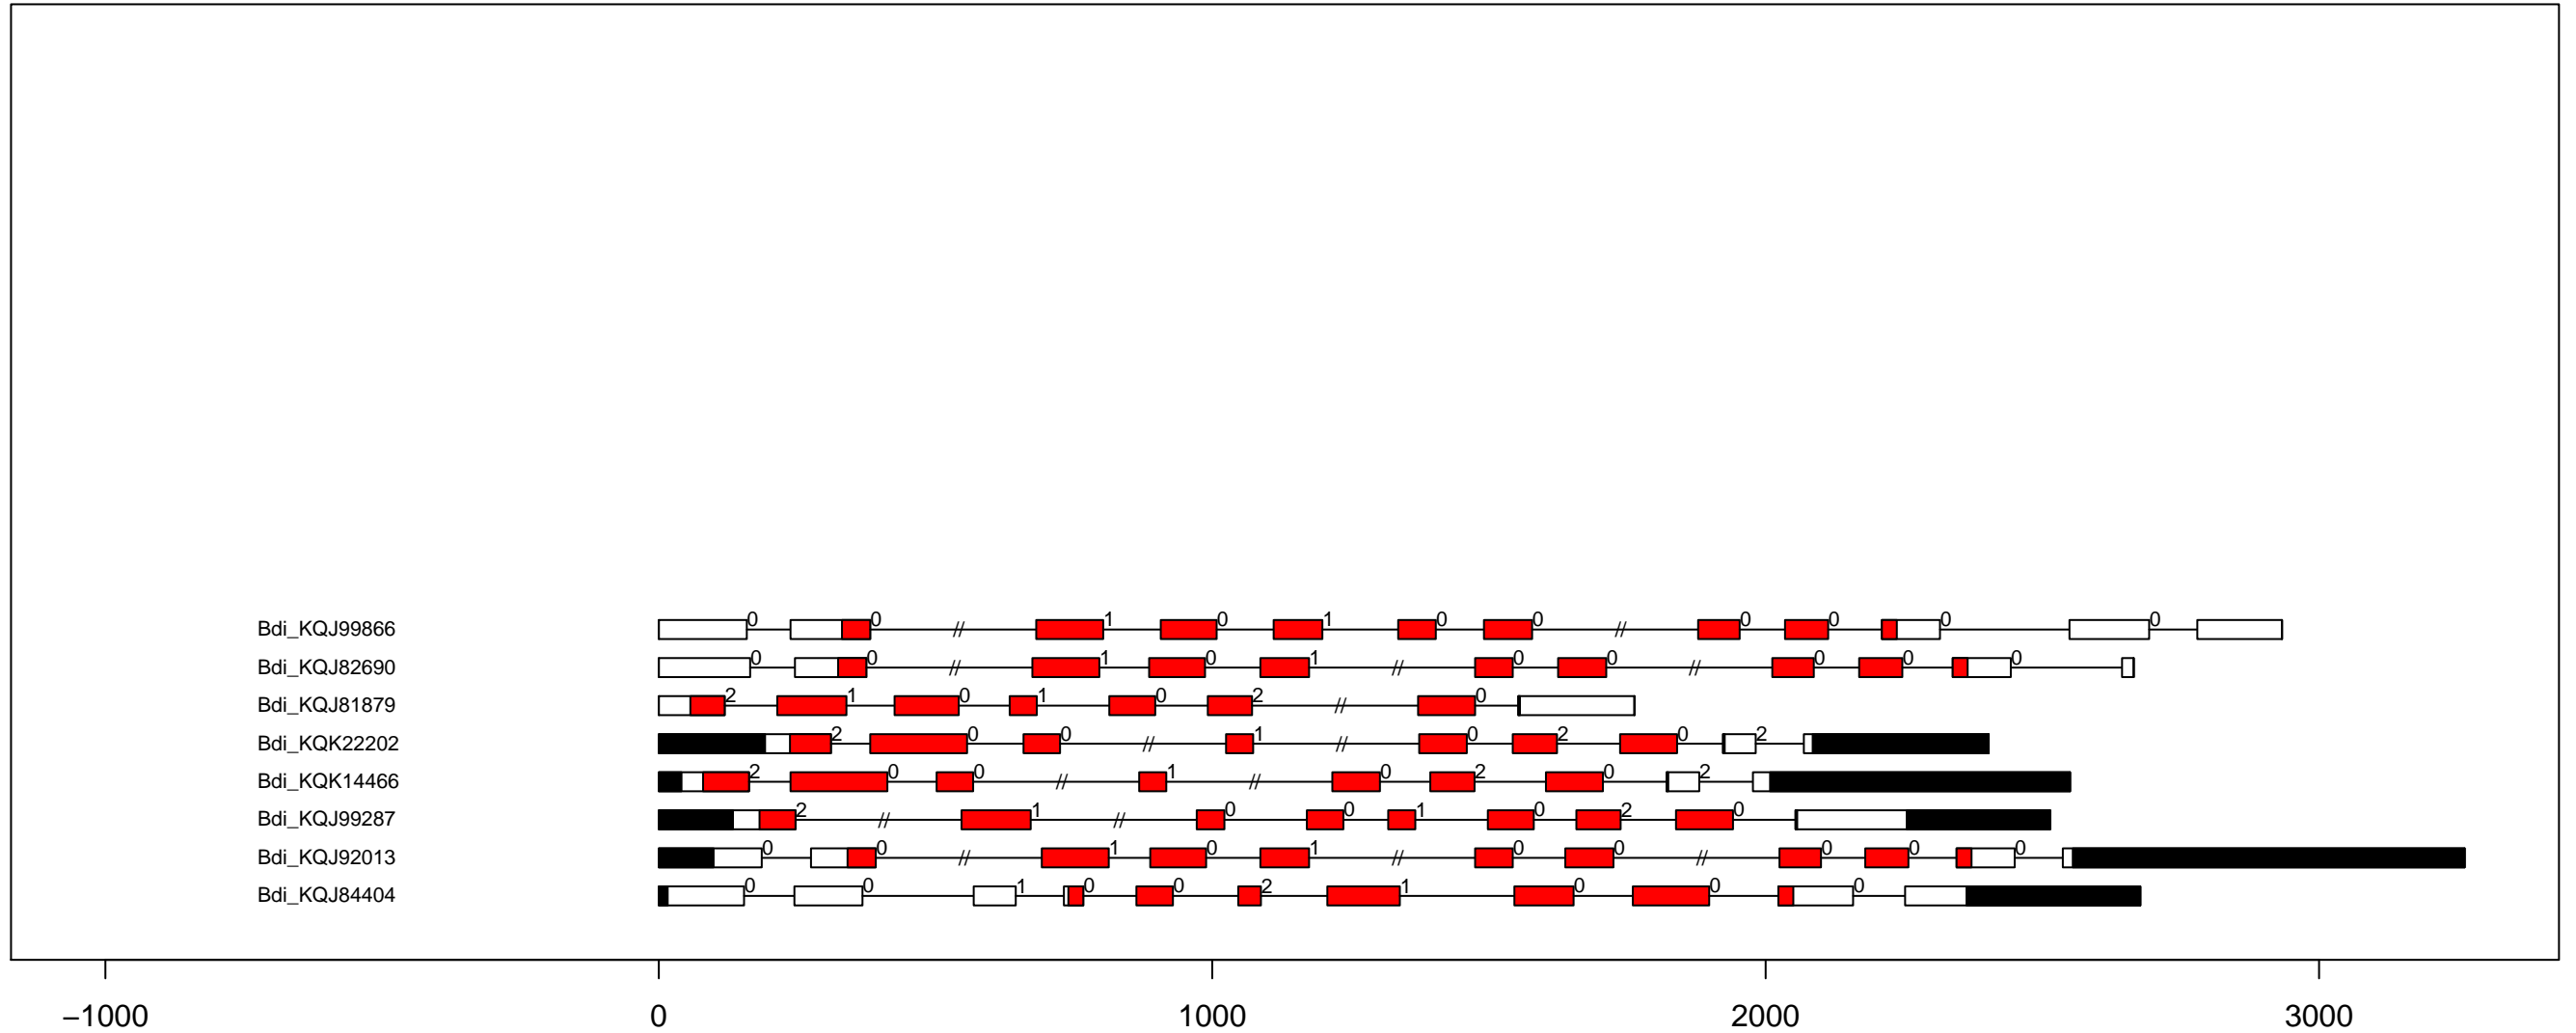



# B.di class III peroxidase X subfamily exon-intron and prx domain diagram (all)

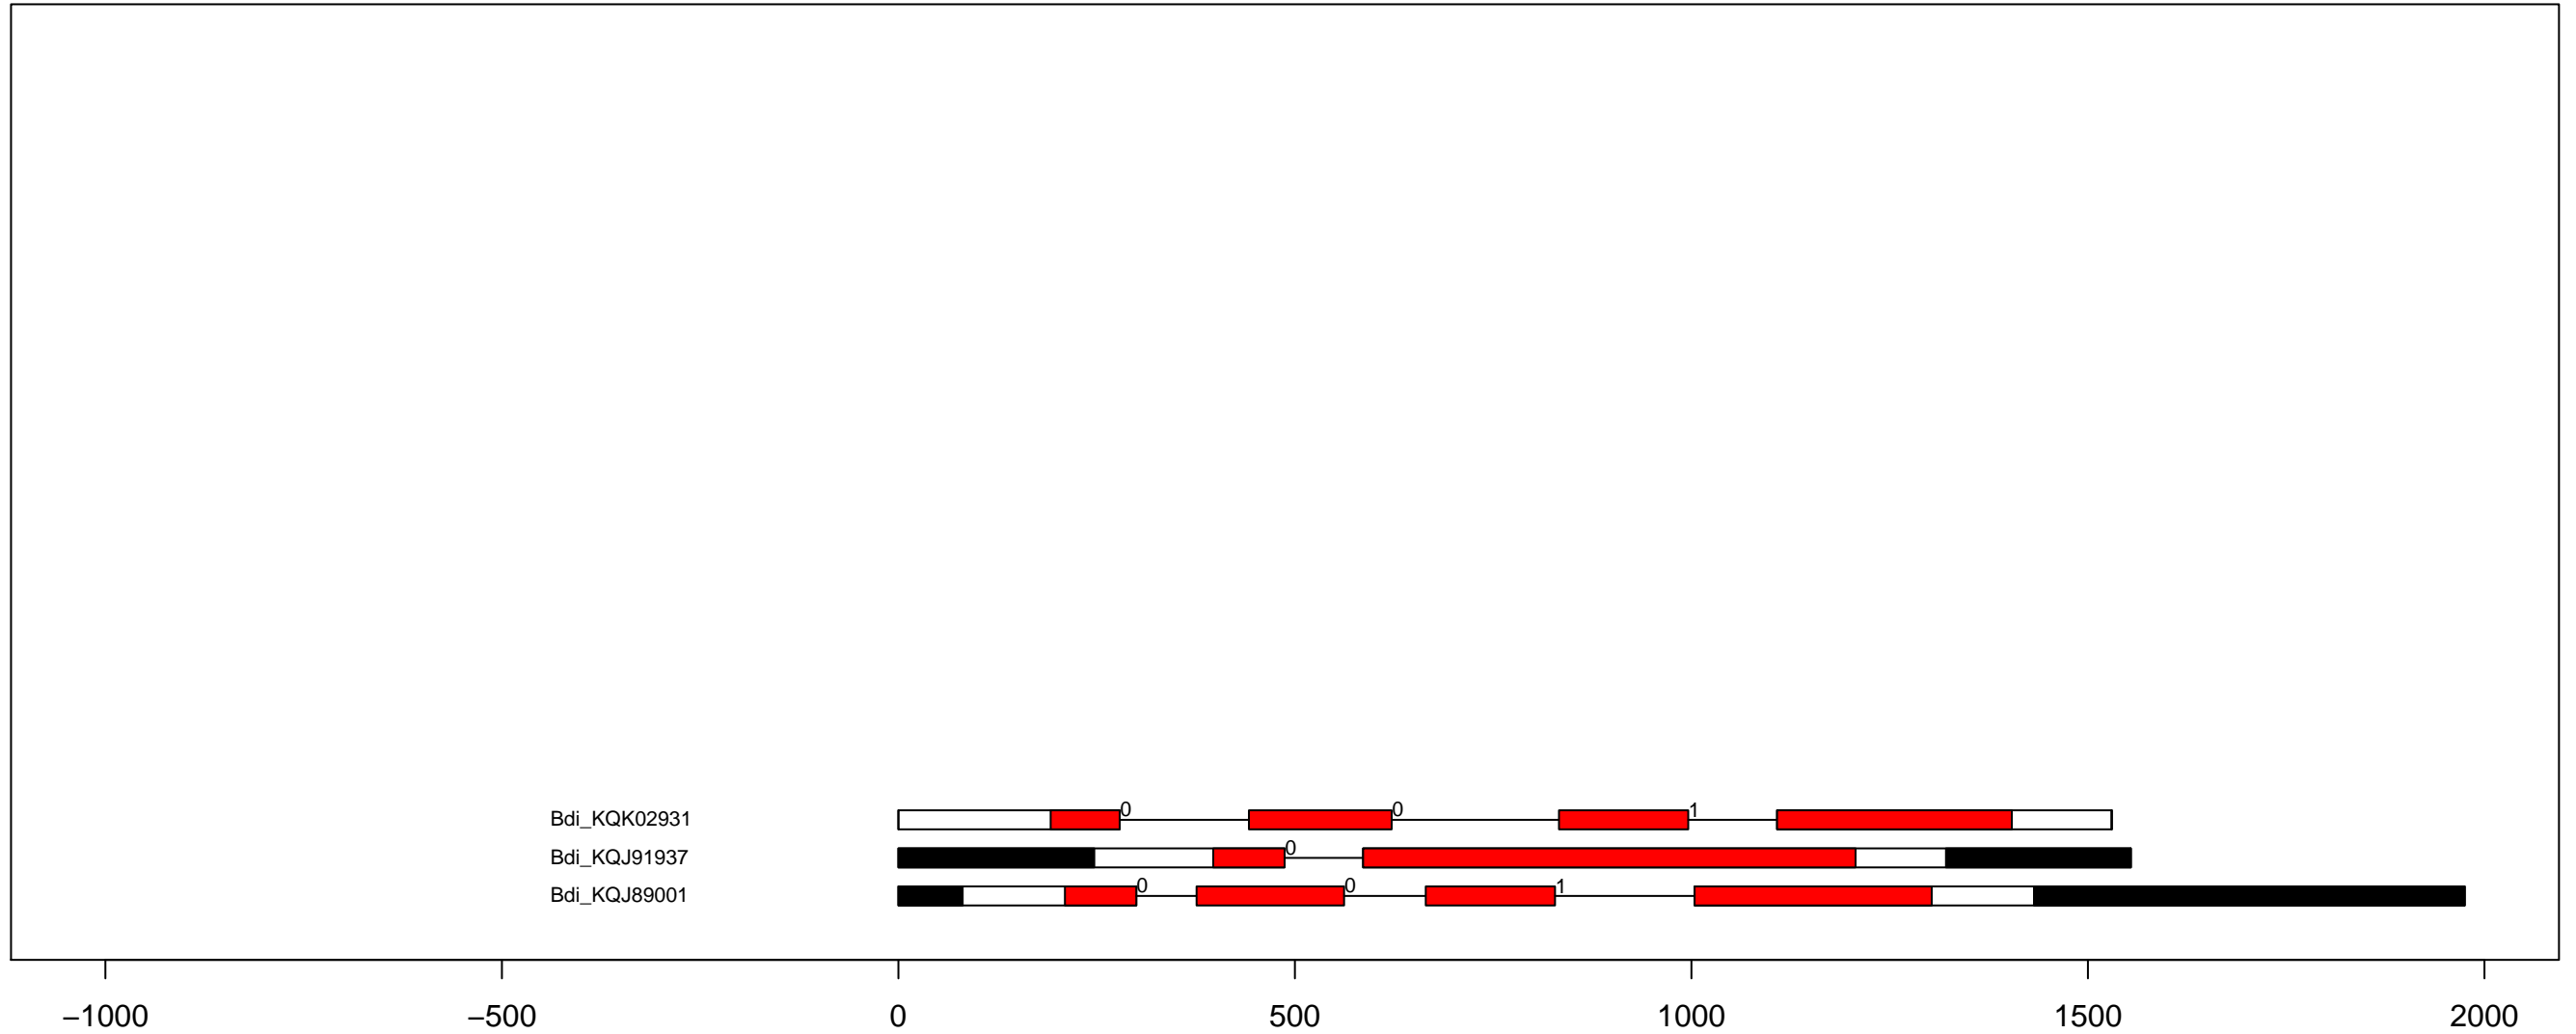

# B.di class III peroxidase XI subfamily exon-intron and prx domain diagram (all)

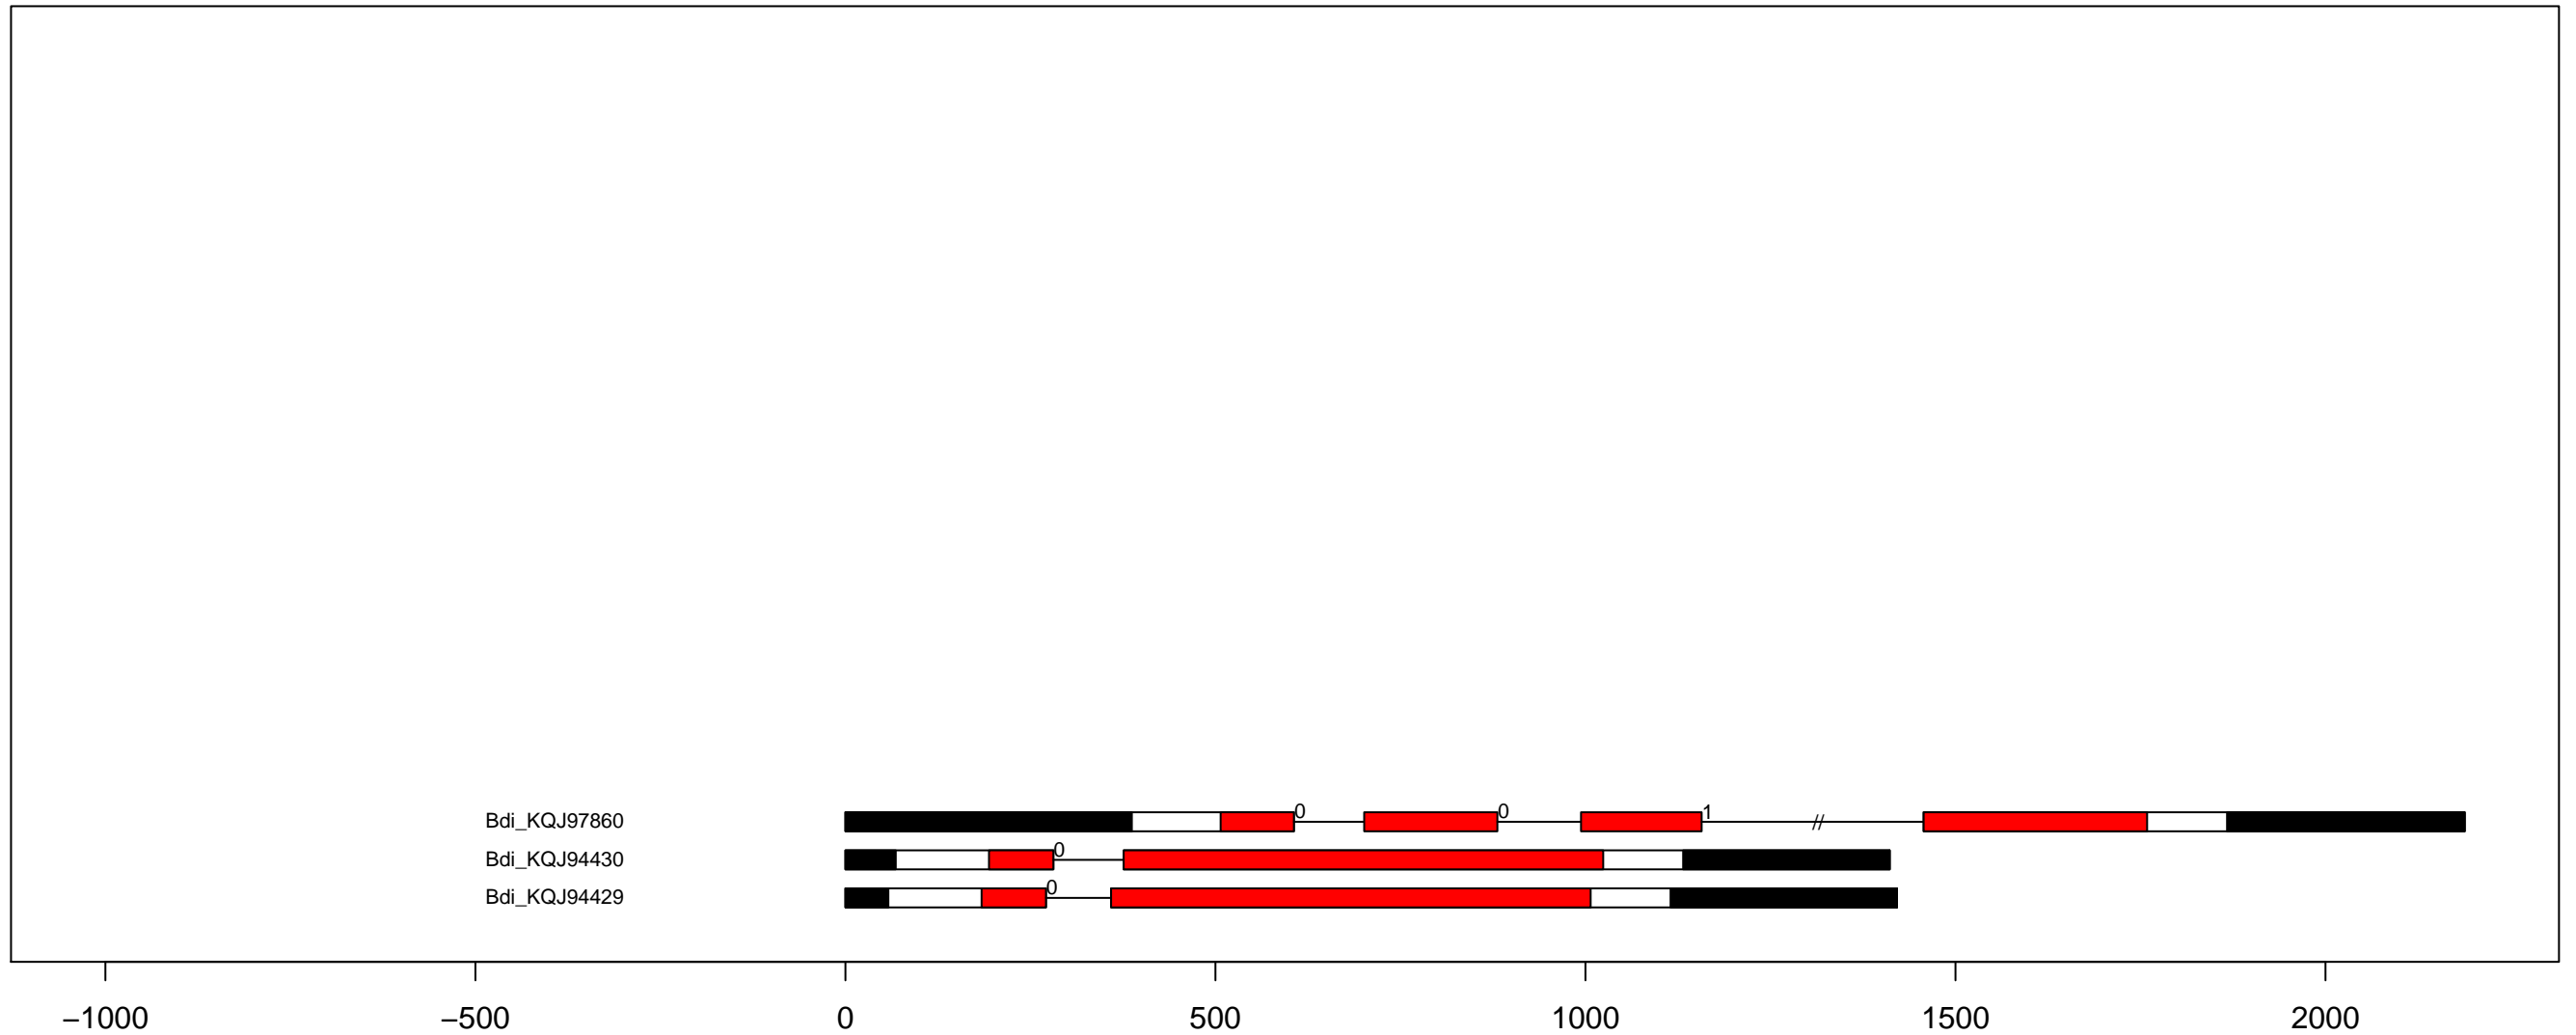

# B.di class III peroxidase XII subfamily exon-intron and prx domain diagram (all)

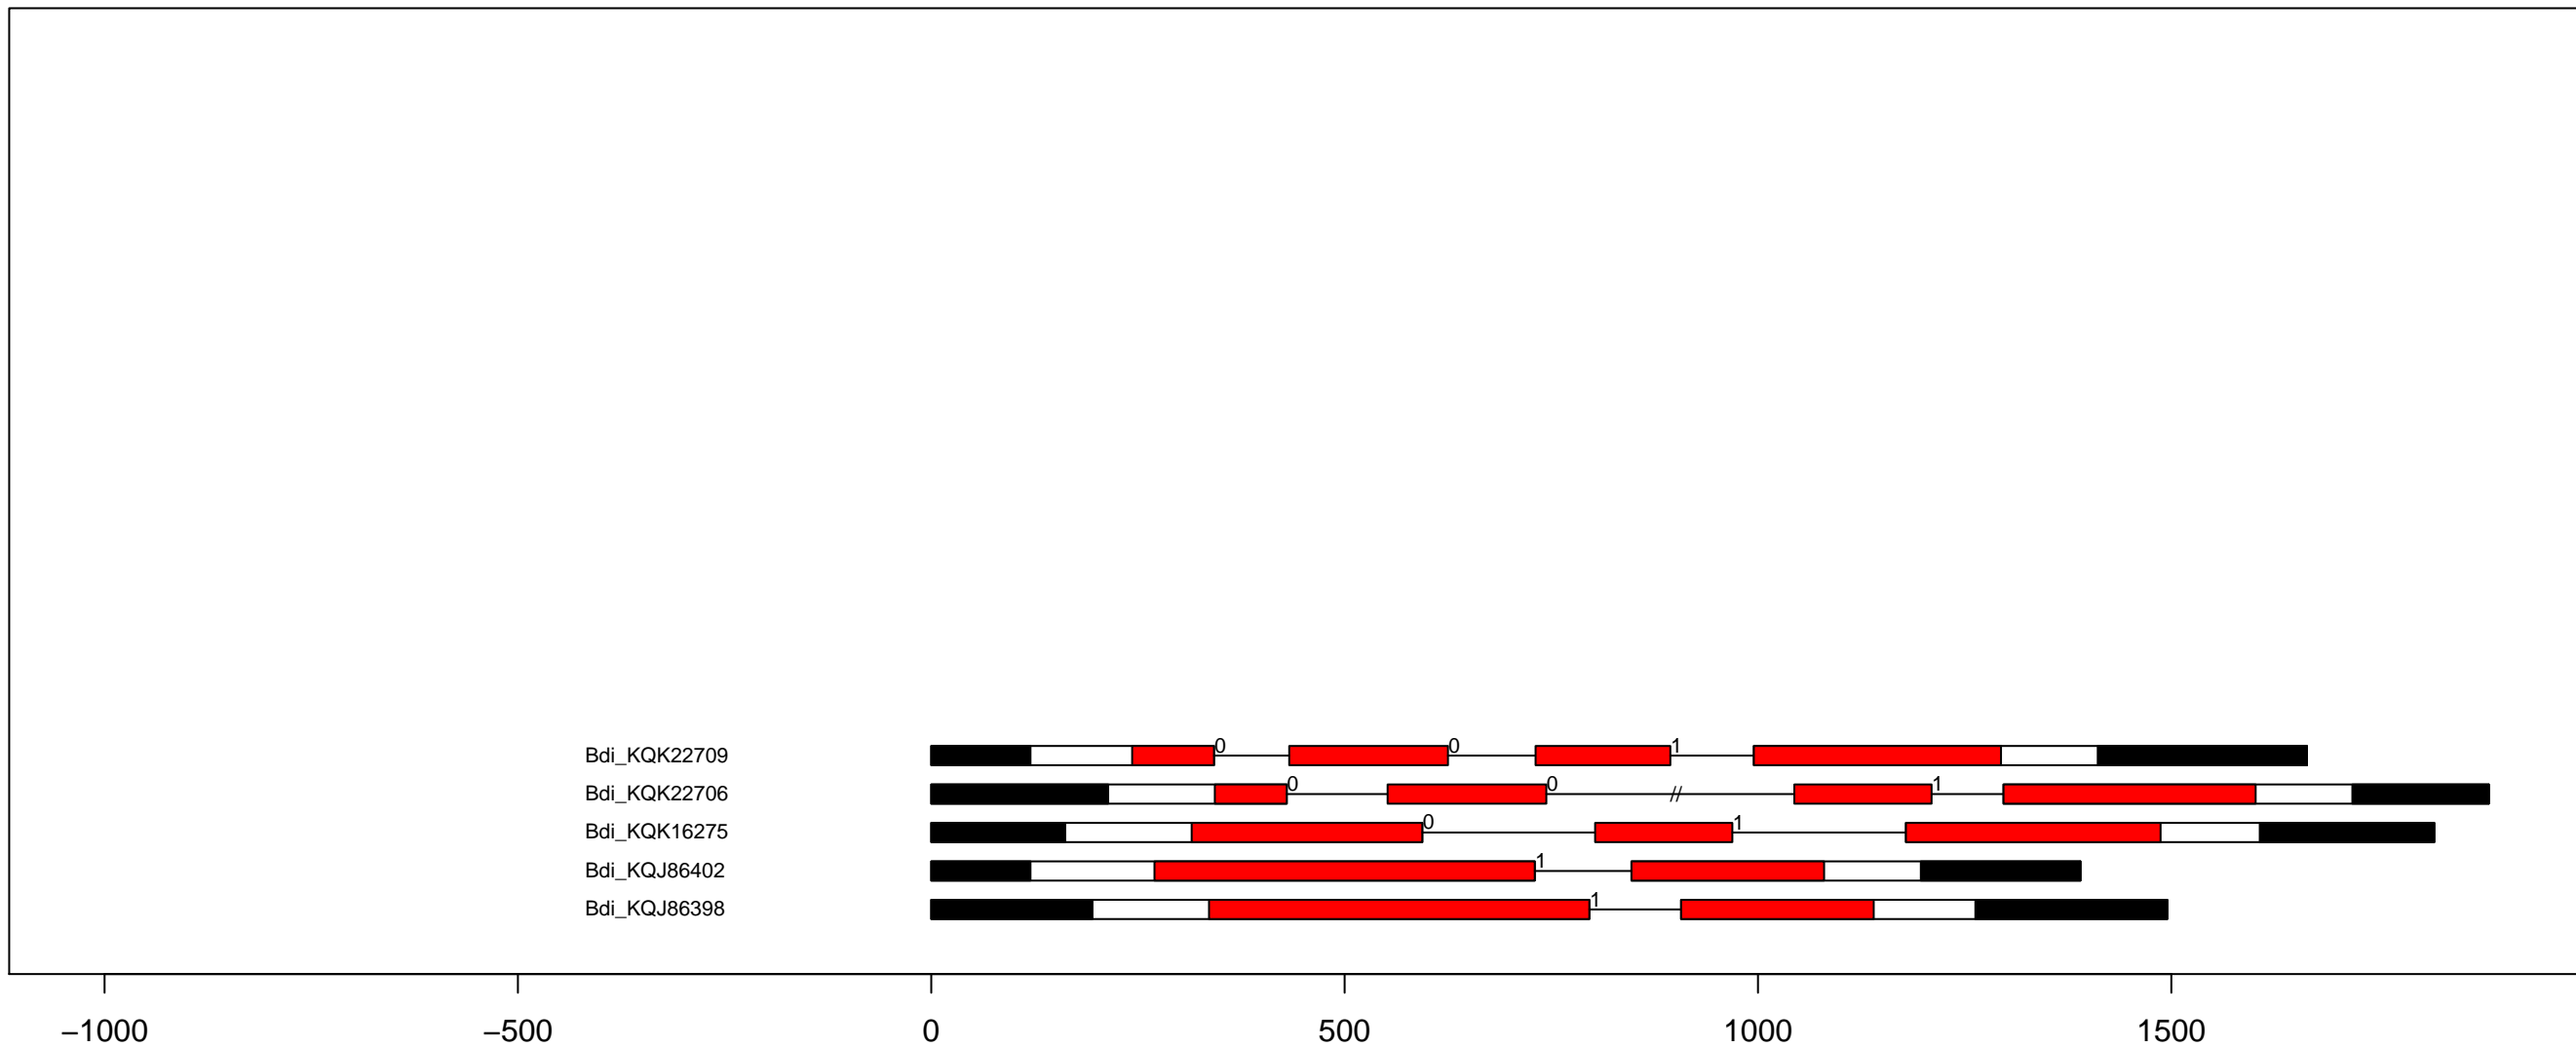

# B.di class III peroxidase XIII subfamily exon-intron and prx domain diagram (all)

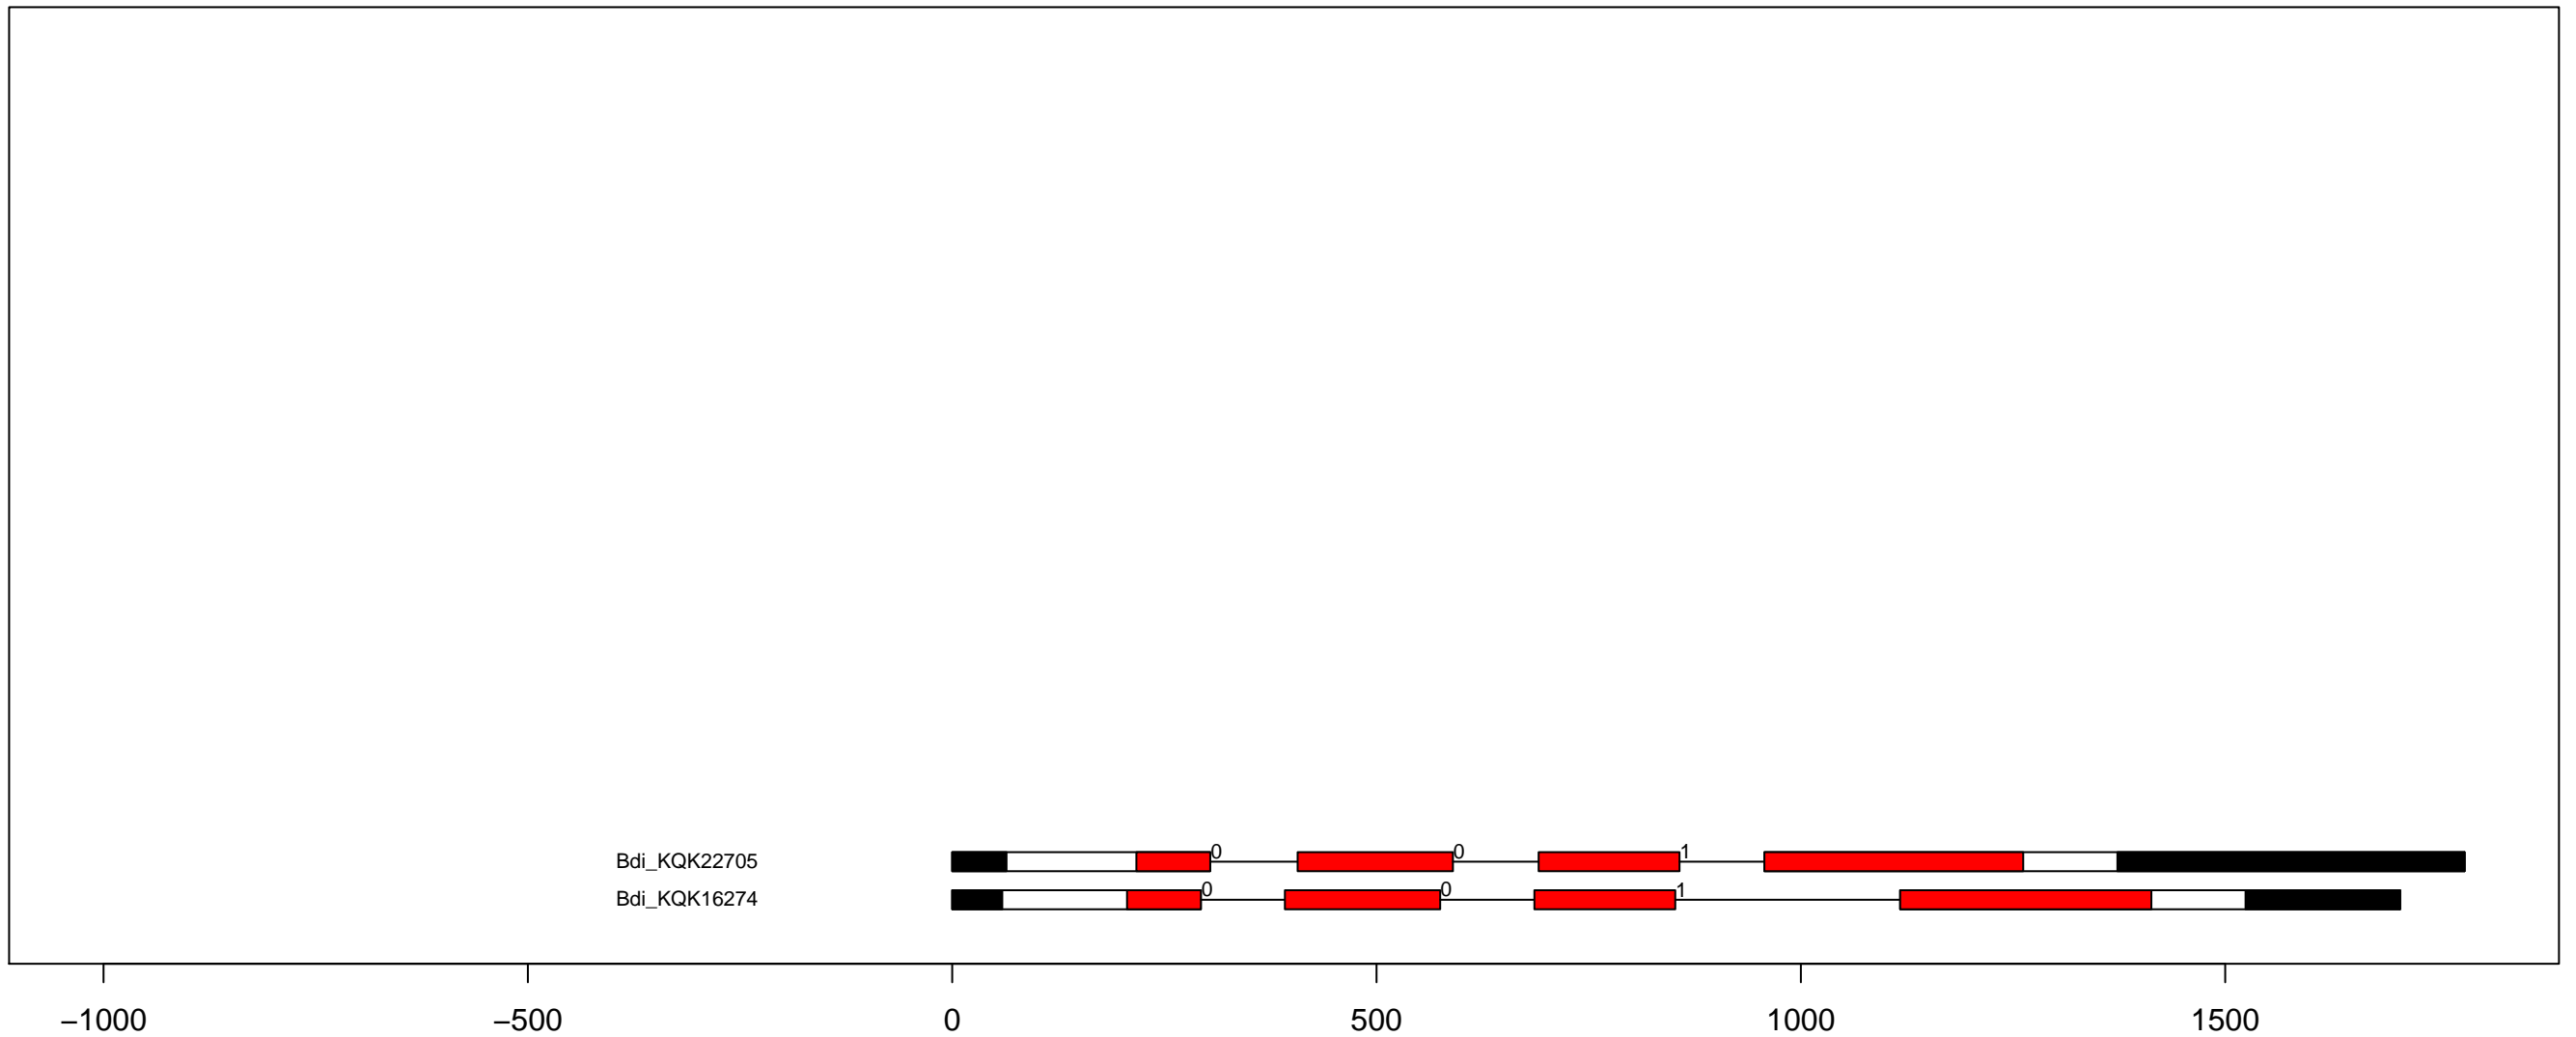



# B.di class III peroxidase XIV subfamily exon-intron and prx domain diagram (all)

Bdi\_PNT64771  
Bdi\_KQK08234  
Bdi\_KQK03766  
Bdi\_KQK03765  
Bdi\_KQK03757  
Bdi\_KQK03752  
Bdi\_KQJ90609  
Bdi\_KQJ82616

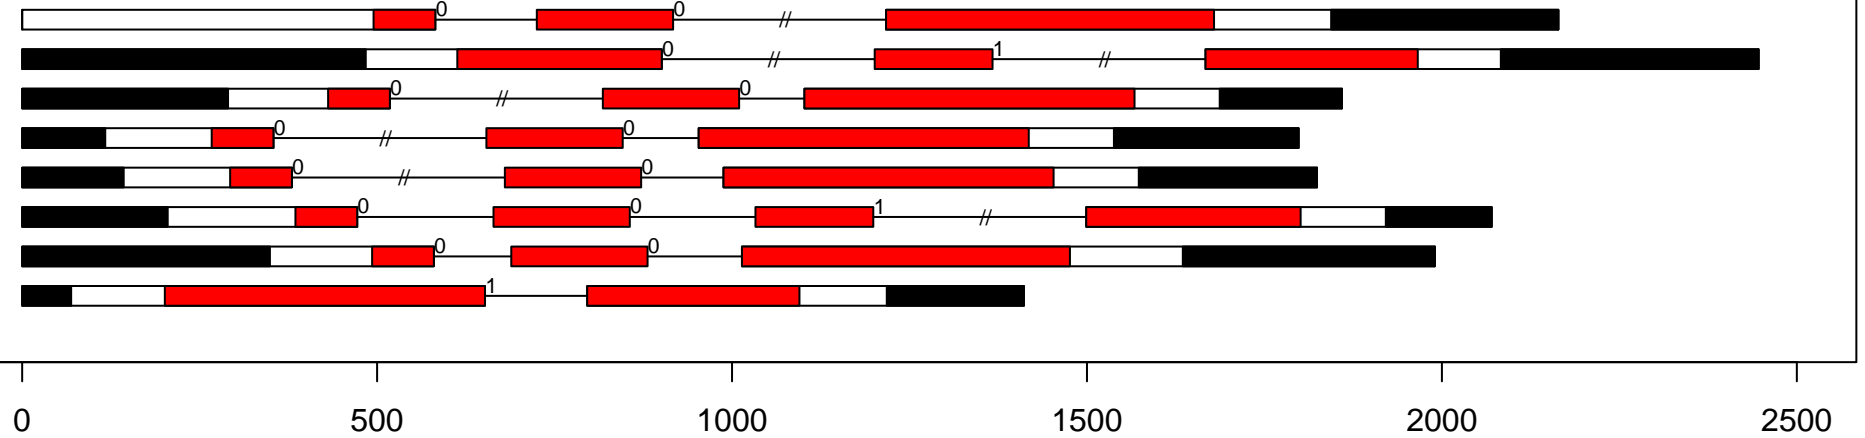

# B.di class III peroxidase XV subfamily exon-intron and prx domain diagram (all)

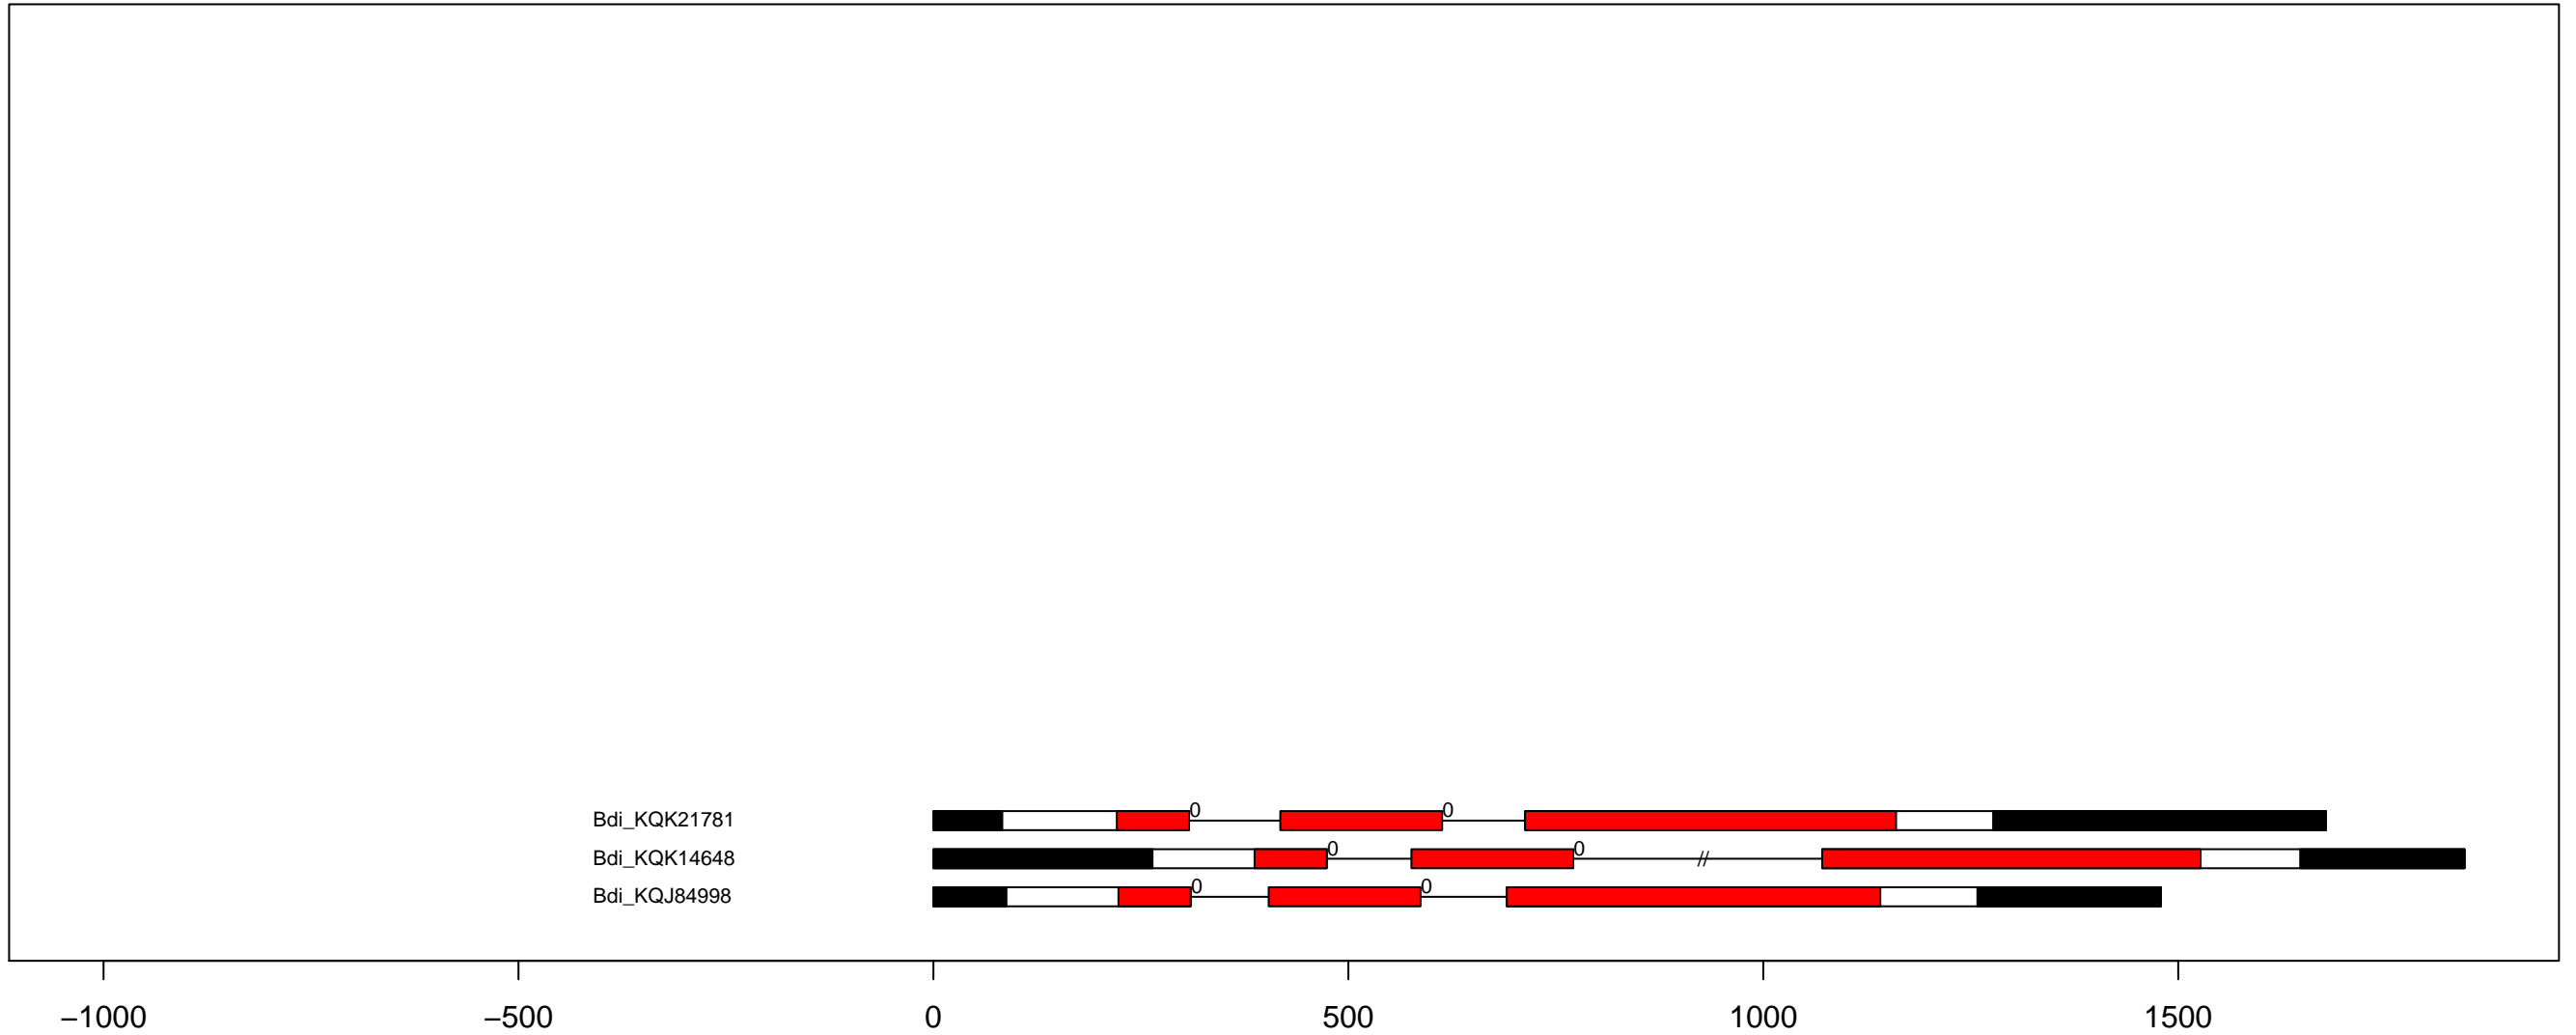

# B.di class III peroxidase XVI subfamily exon-intron and prx domain diagram (all)

Bdi\_KQK20877  
Bdi\_KQK18293  
Bdi\_KQK18159  
Bdi\_KQK18061  
Bdi\_KQK18055  
Bdi\_KQK18053  
Bdi\_KQK18052  
Bdi\_KQK03240  
Bdi\_KQJ94196  
Bdi\_KQJ94195  
Bdi\_KQJ94194  
Bdi\_KQJ94190  
Bdi\_KQJ94189  
Bdi\_KQJ94188  
Bdi\_KQJ84288

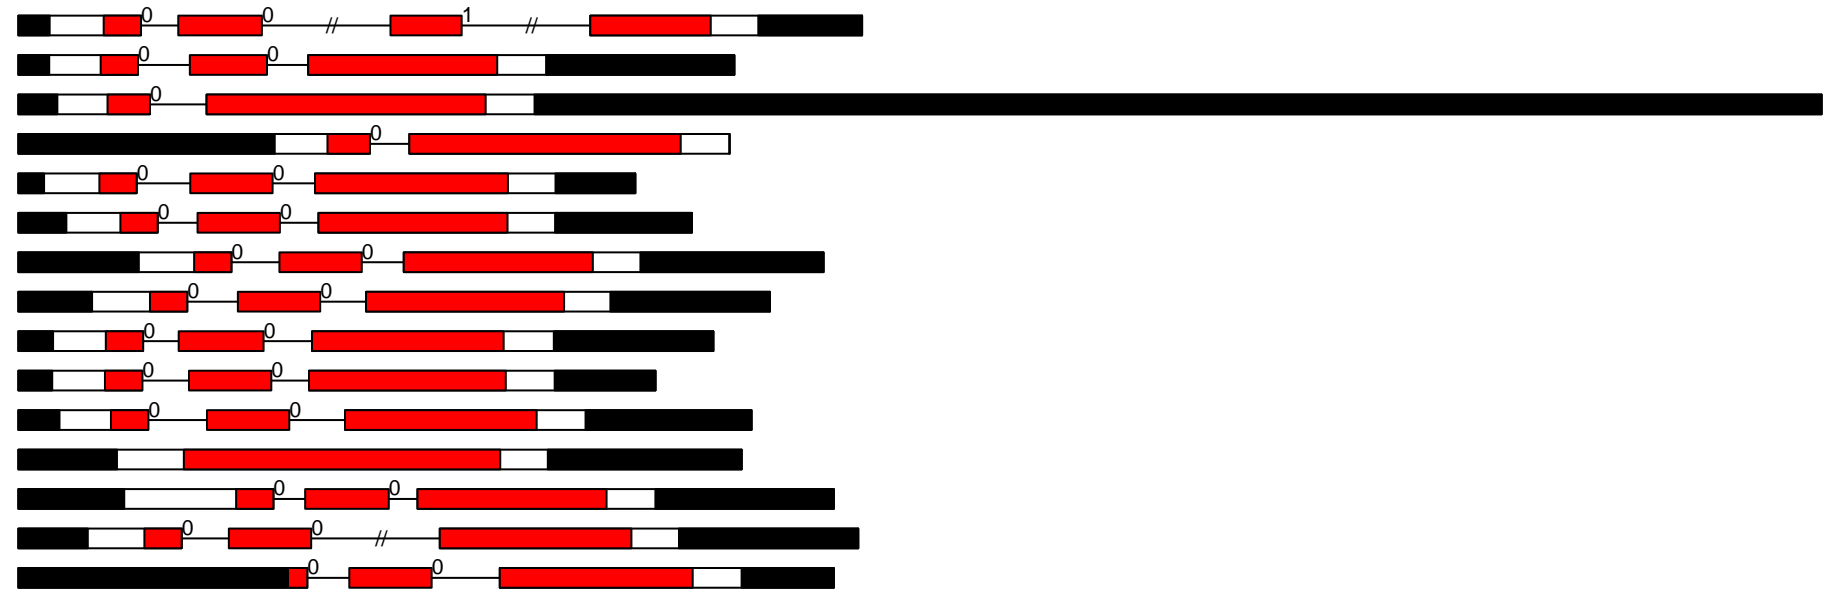

-1000

0

1000

2000

3000

4000

# B.di class III peroxidase XVII subfamily exon-intron and prx domain diagram (all)

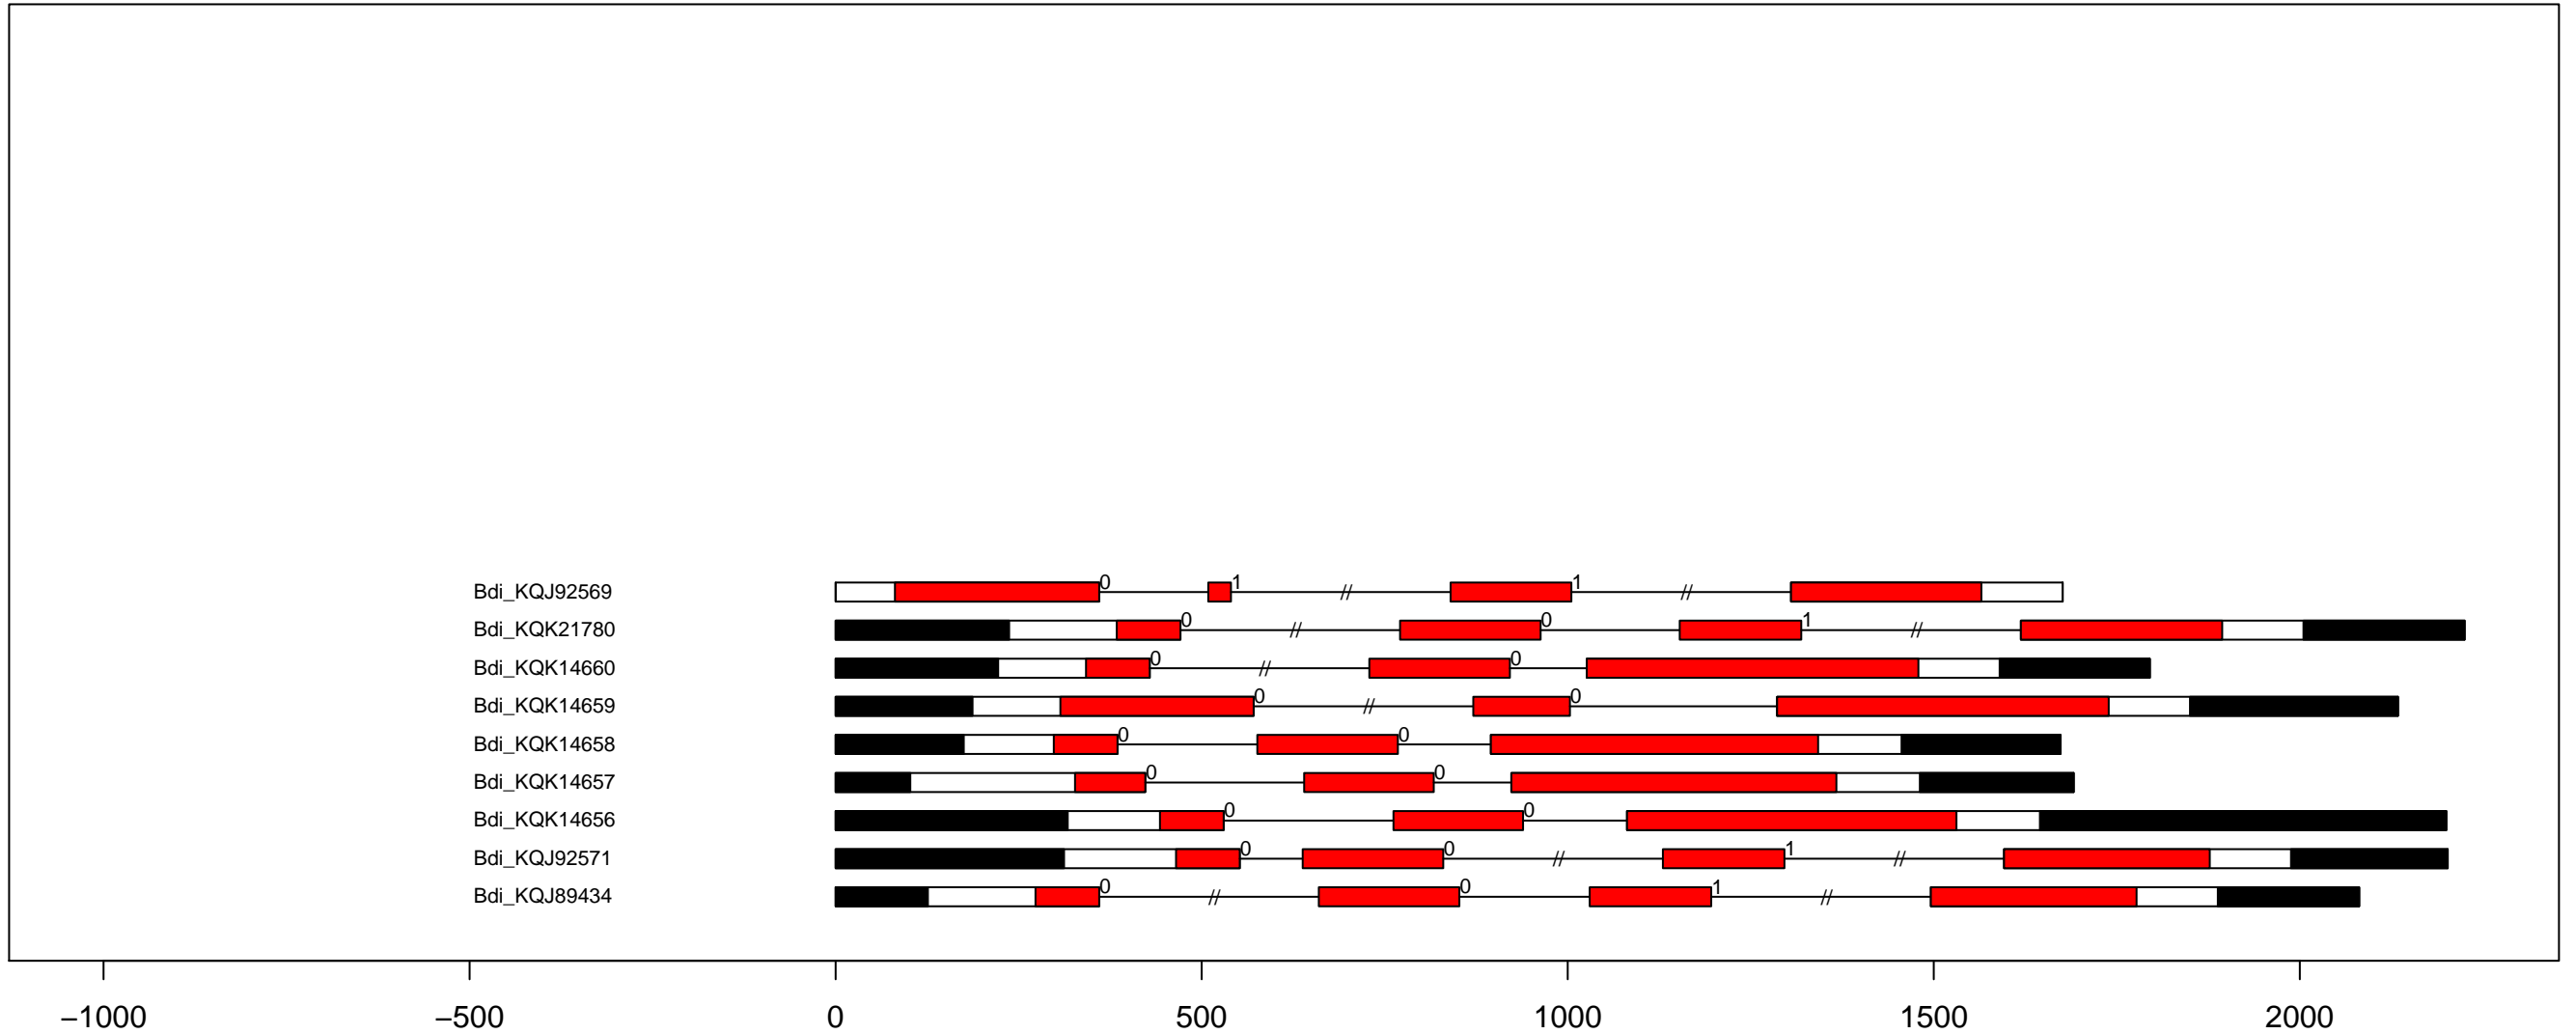

# B.di class III peroxidase XVIII subfamily exon-intron and prx domain diagram (all)

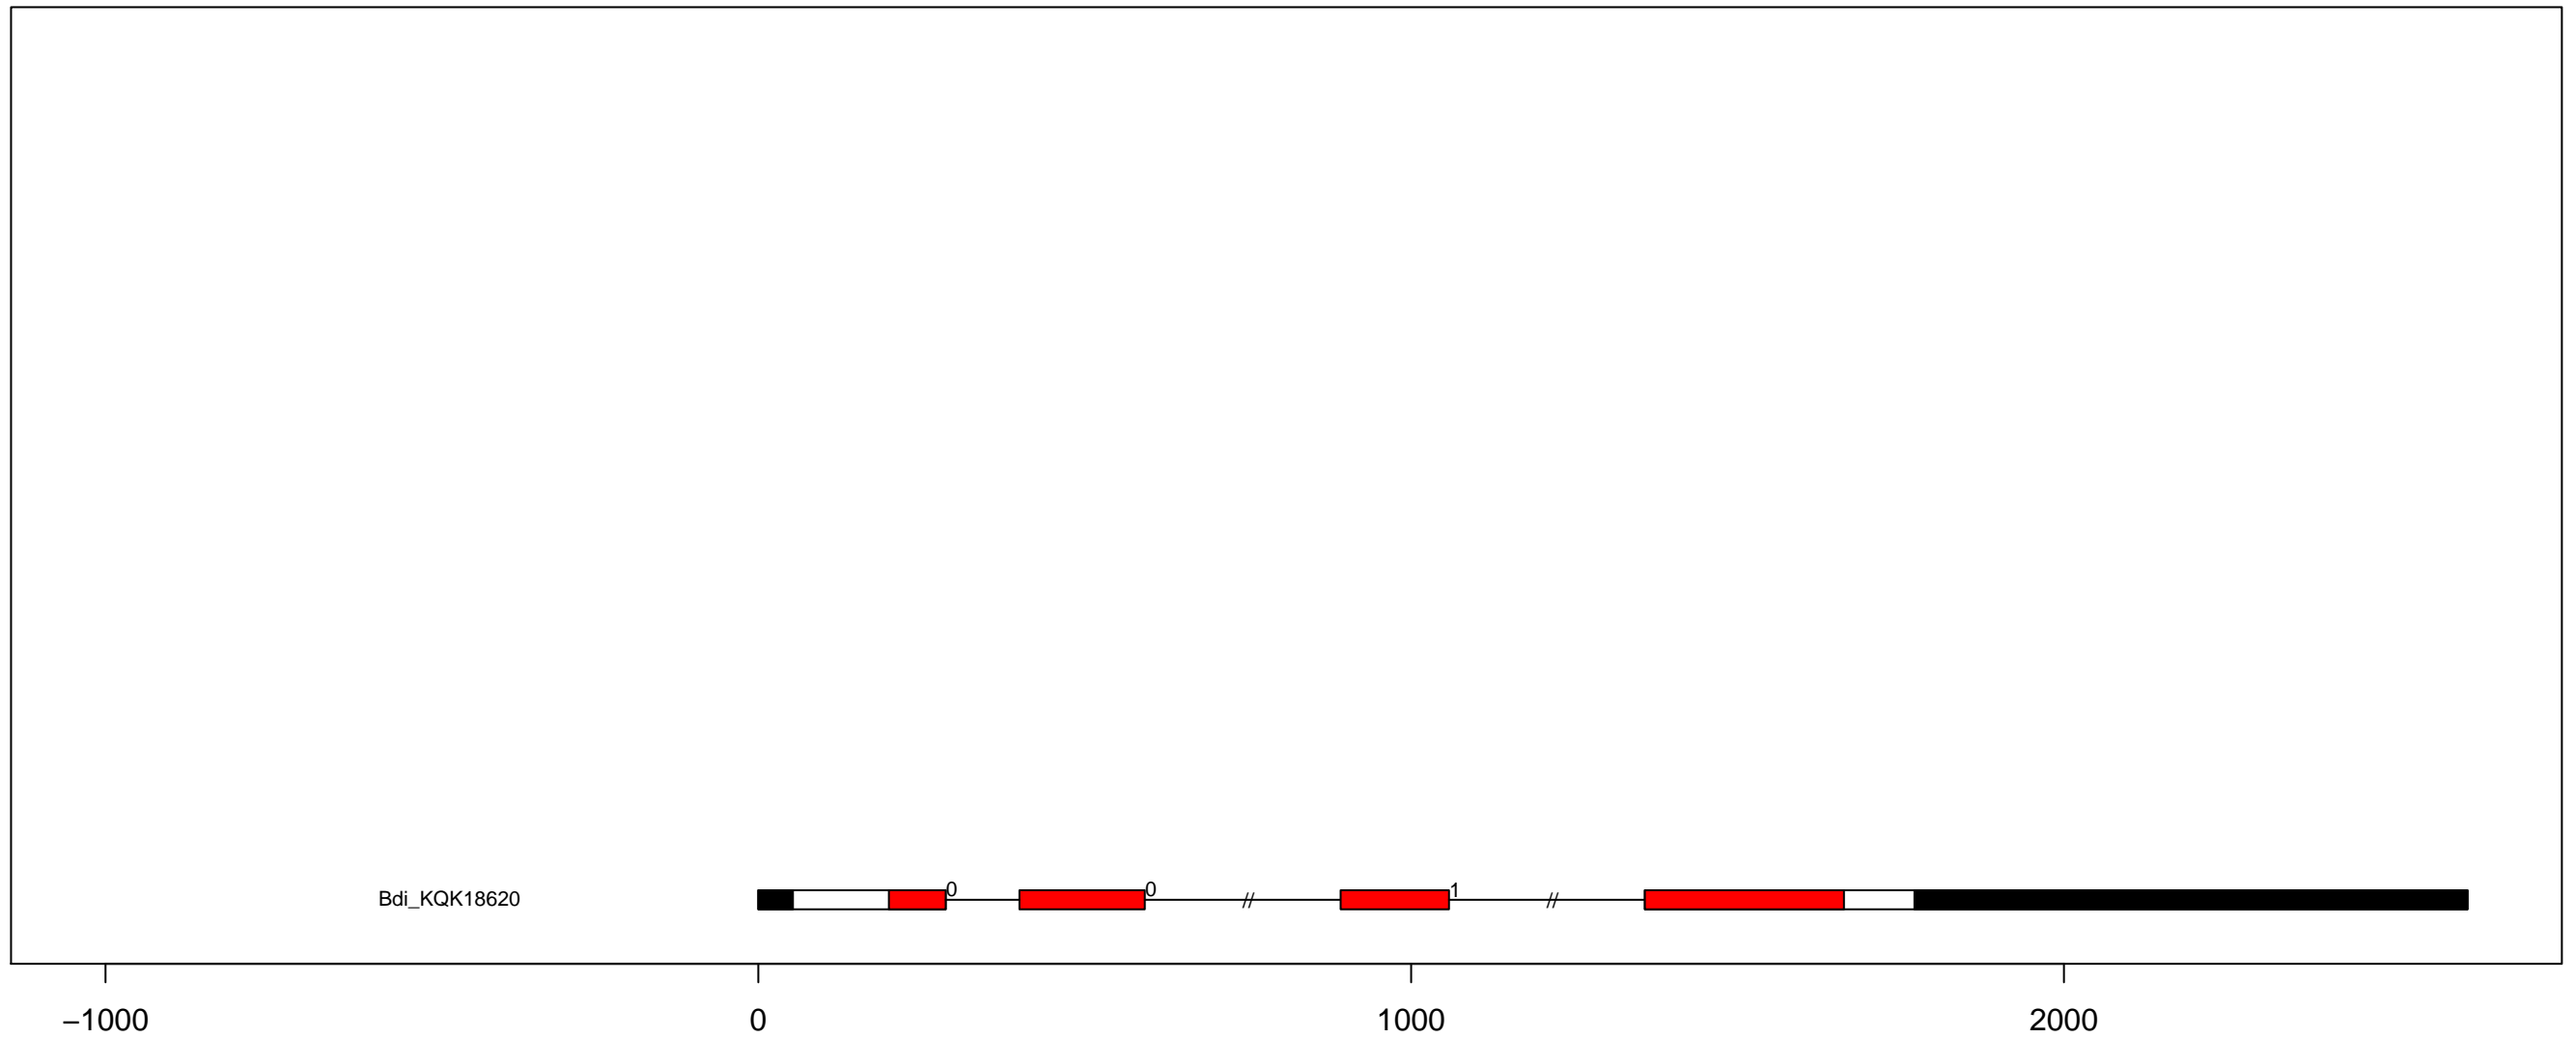

# B.di class III peroxidase unclar\_classifications subfamily exon-intron and prx domain diagram (all)

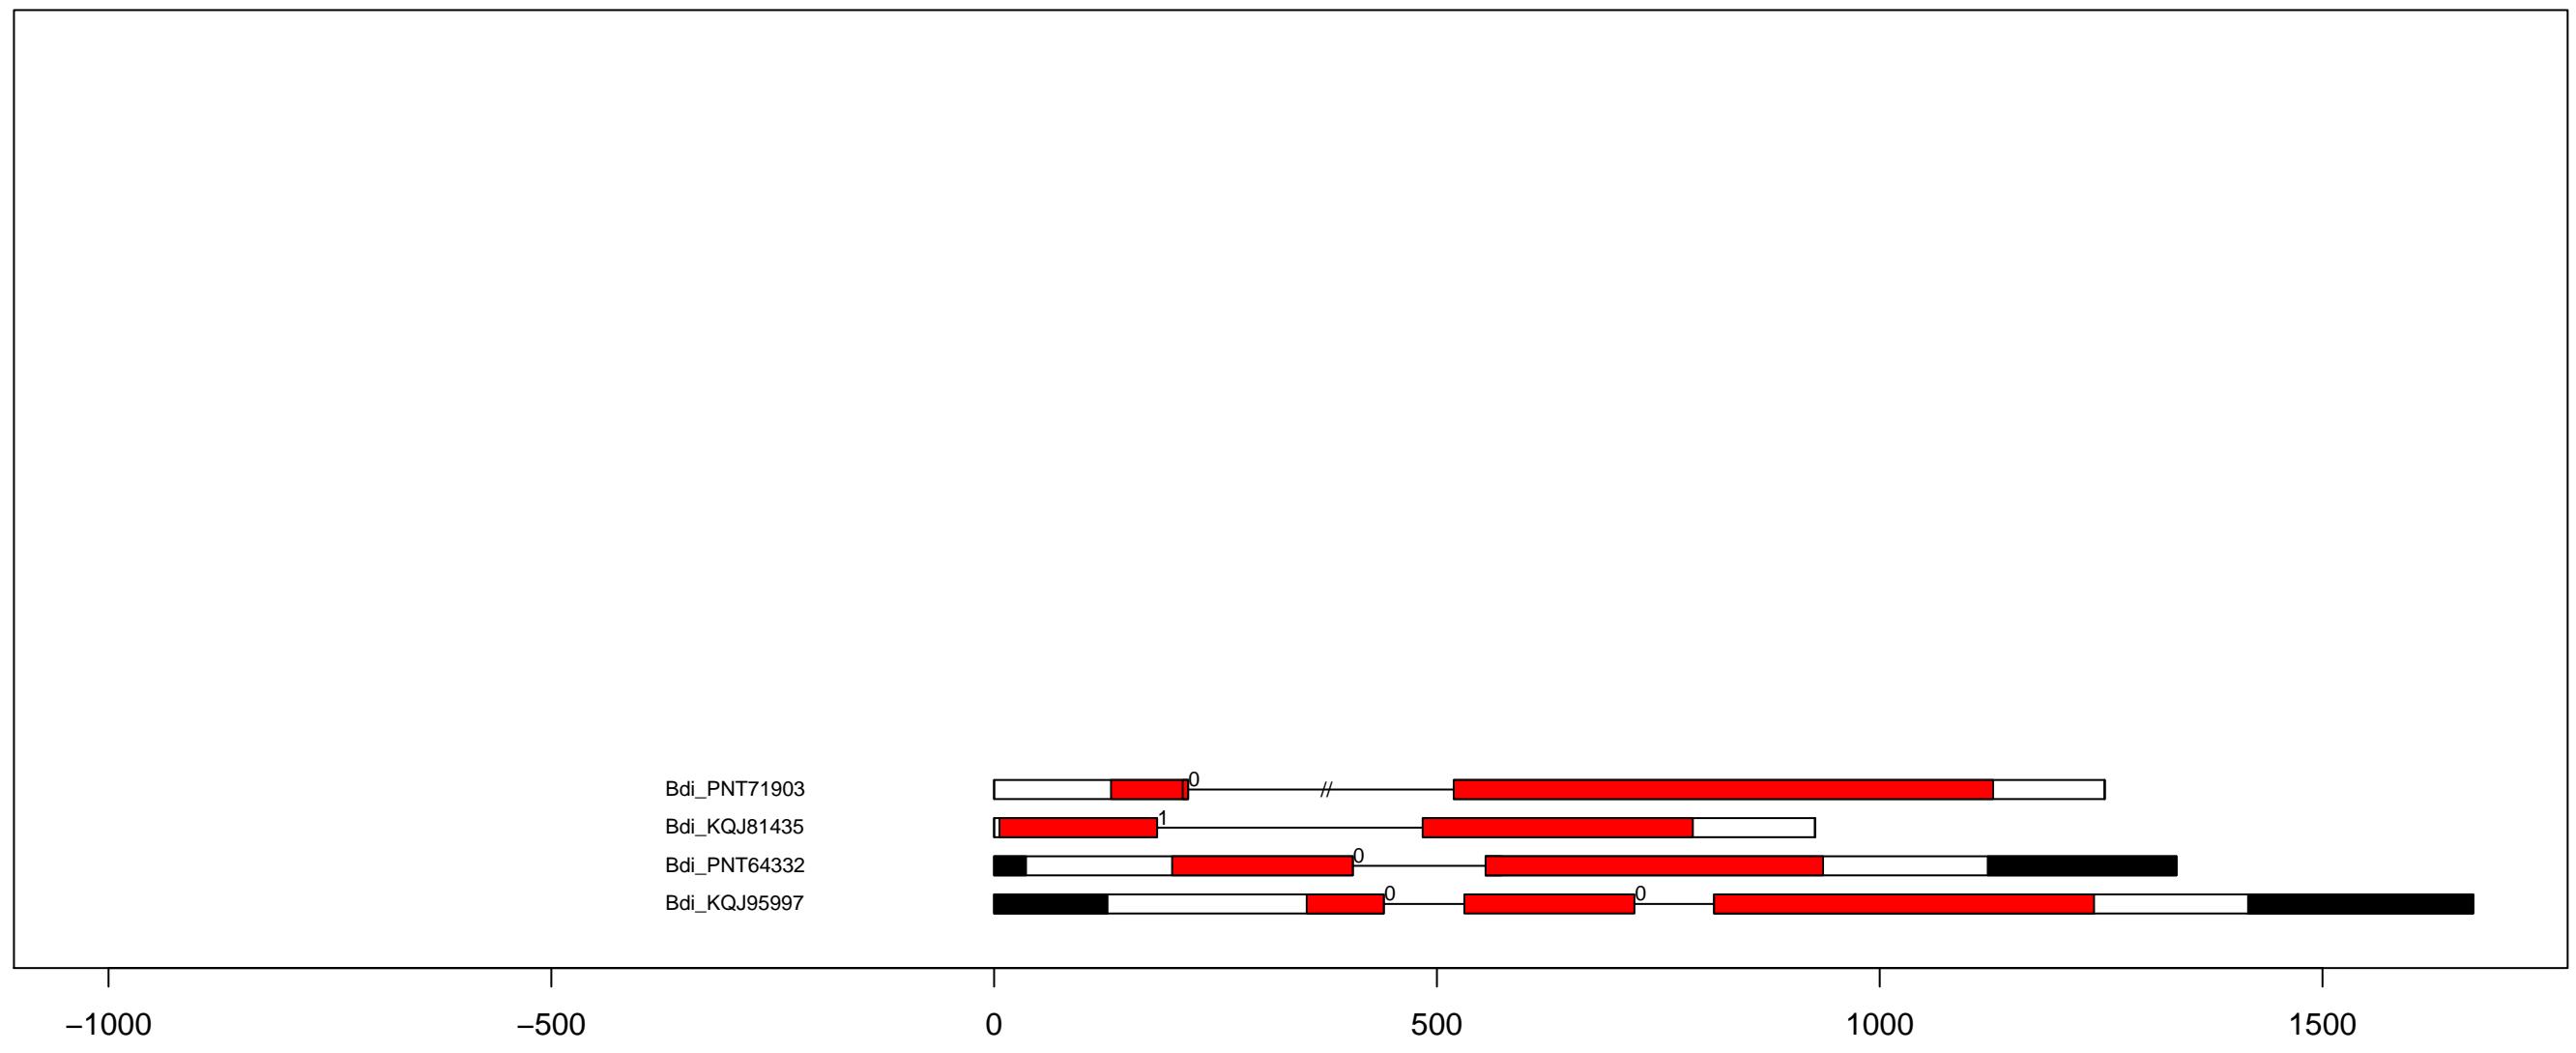

### O.sa class III peroxidase I subfamily exon-intron and prx domain diagram (part 1)

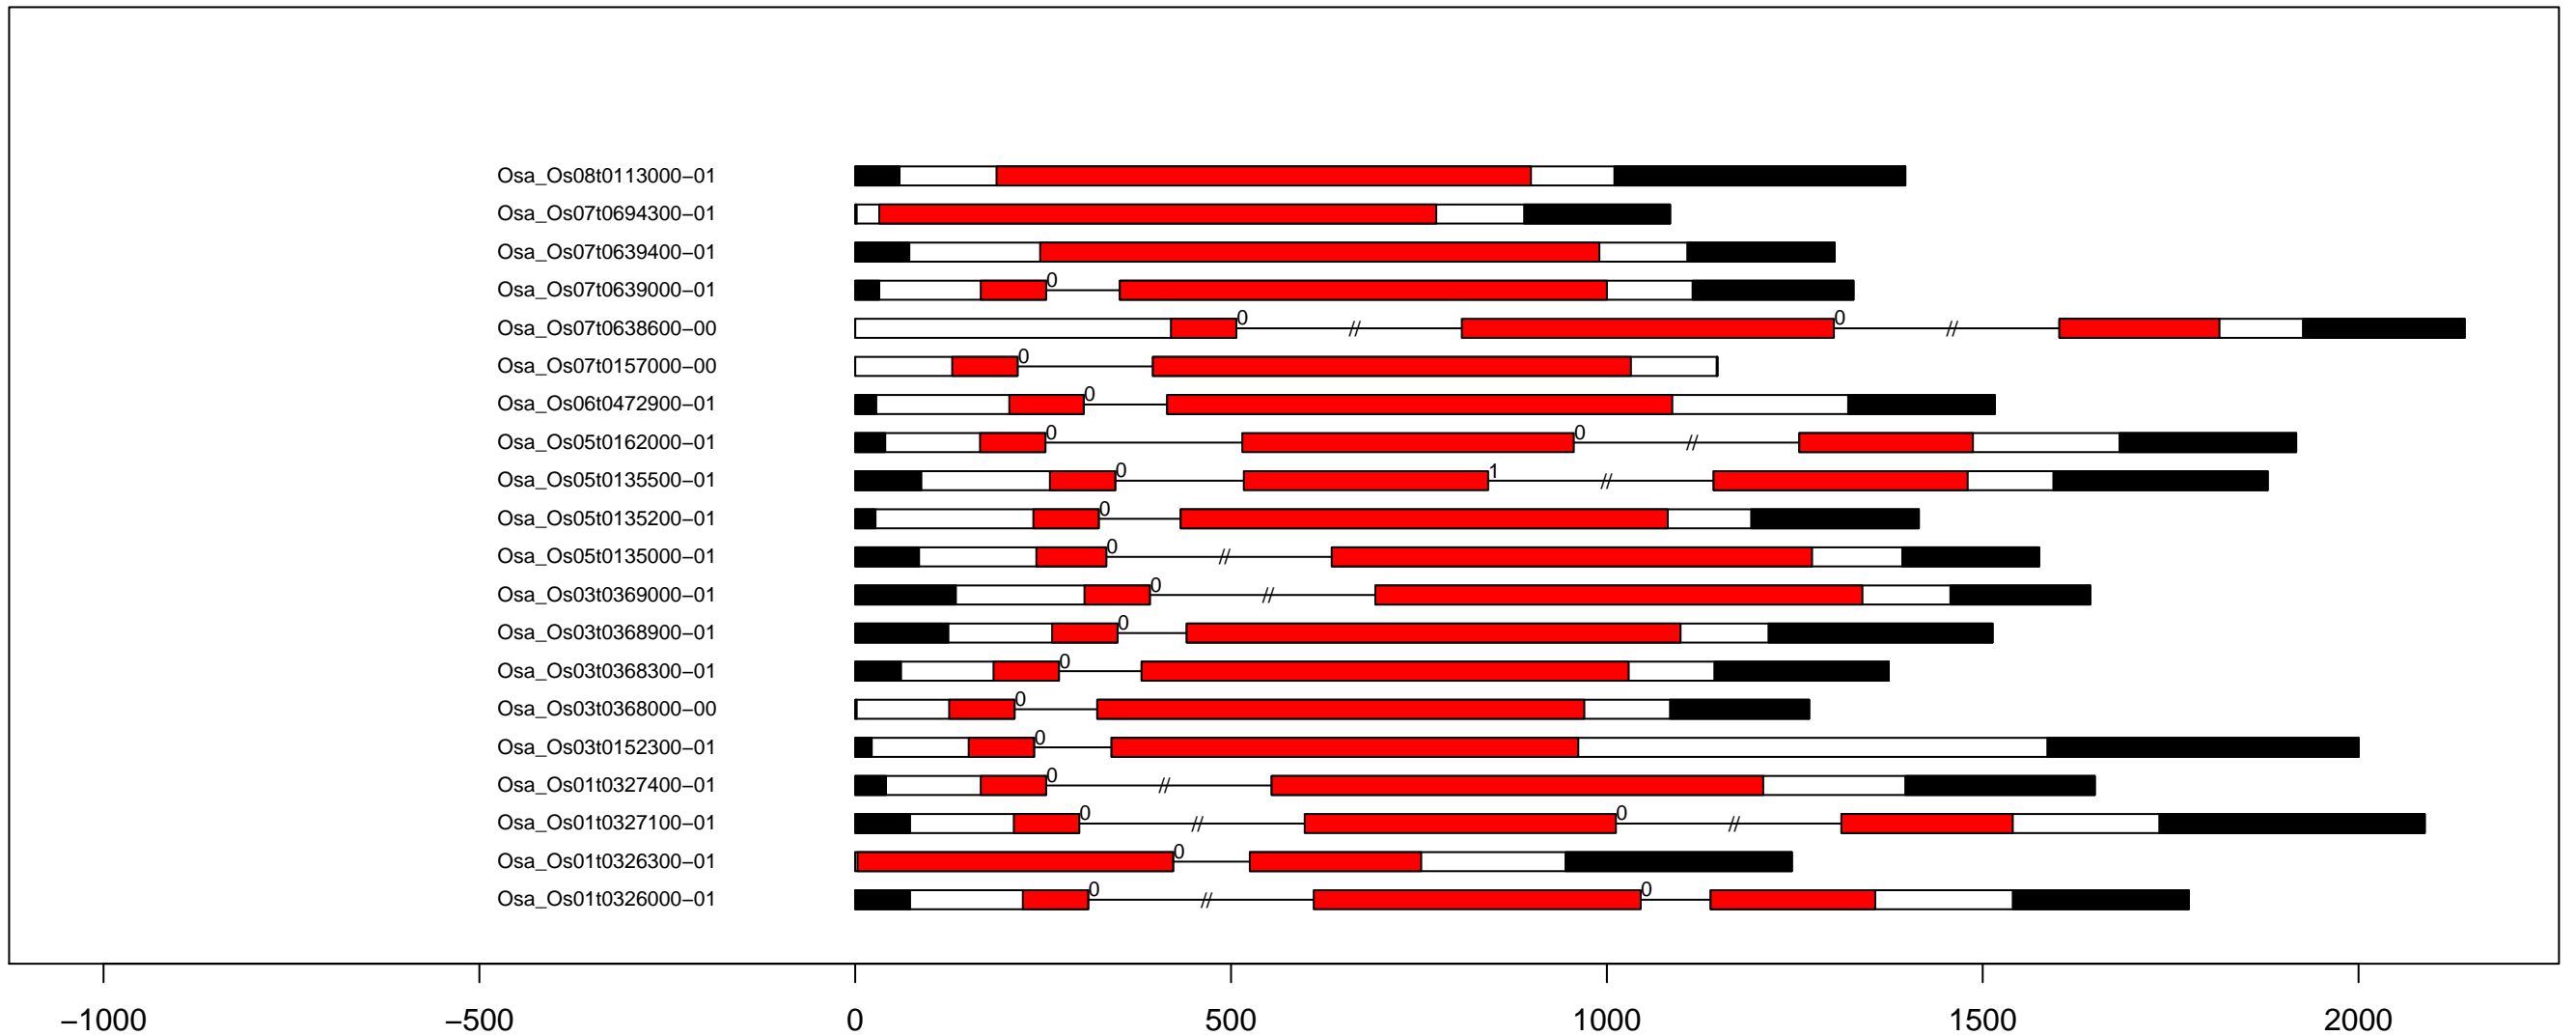

# O.sa class III peroxidase I subfamily exon-intron and prx domain diagram (part 2)

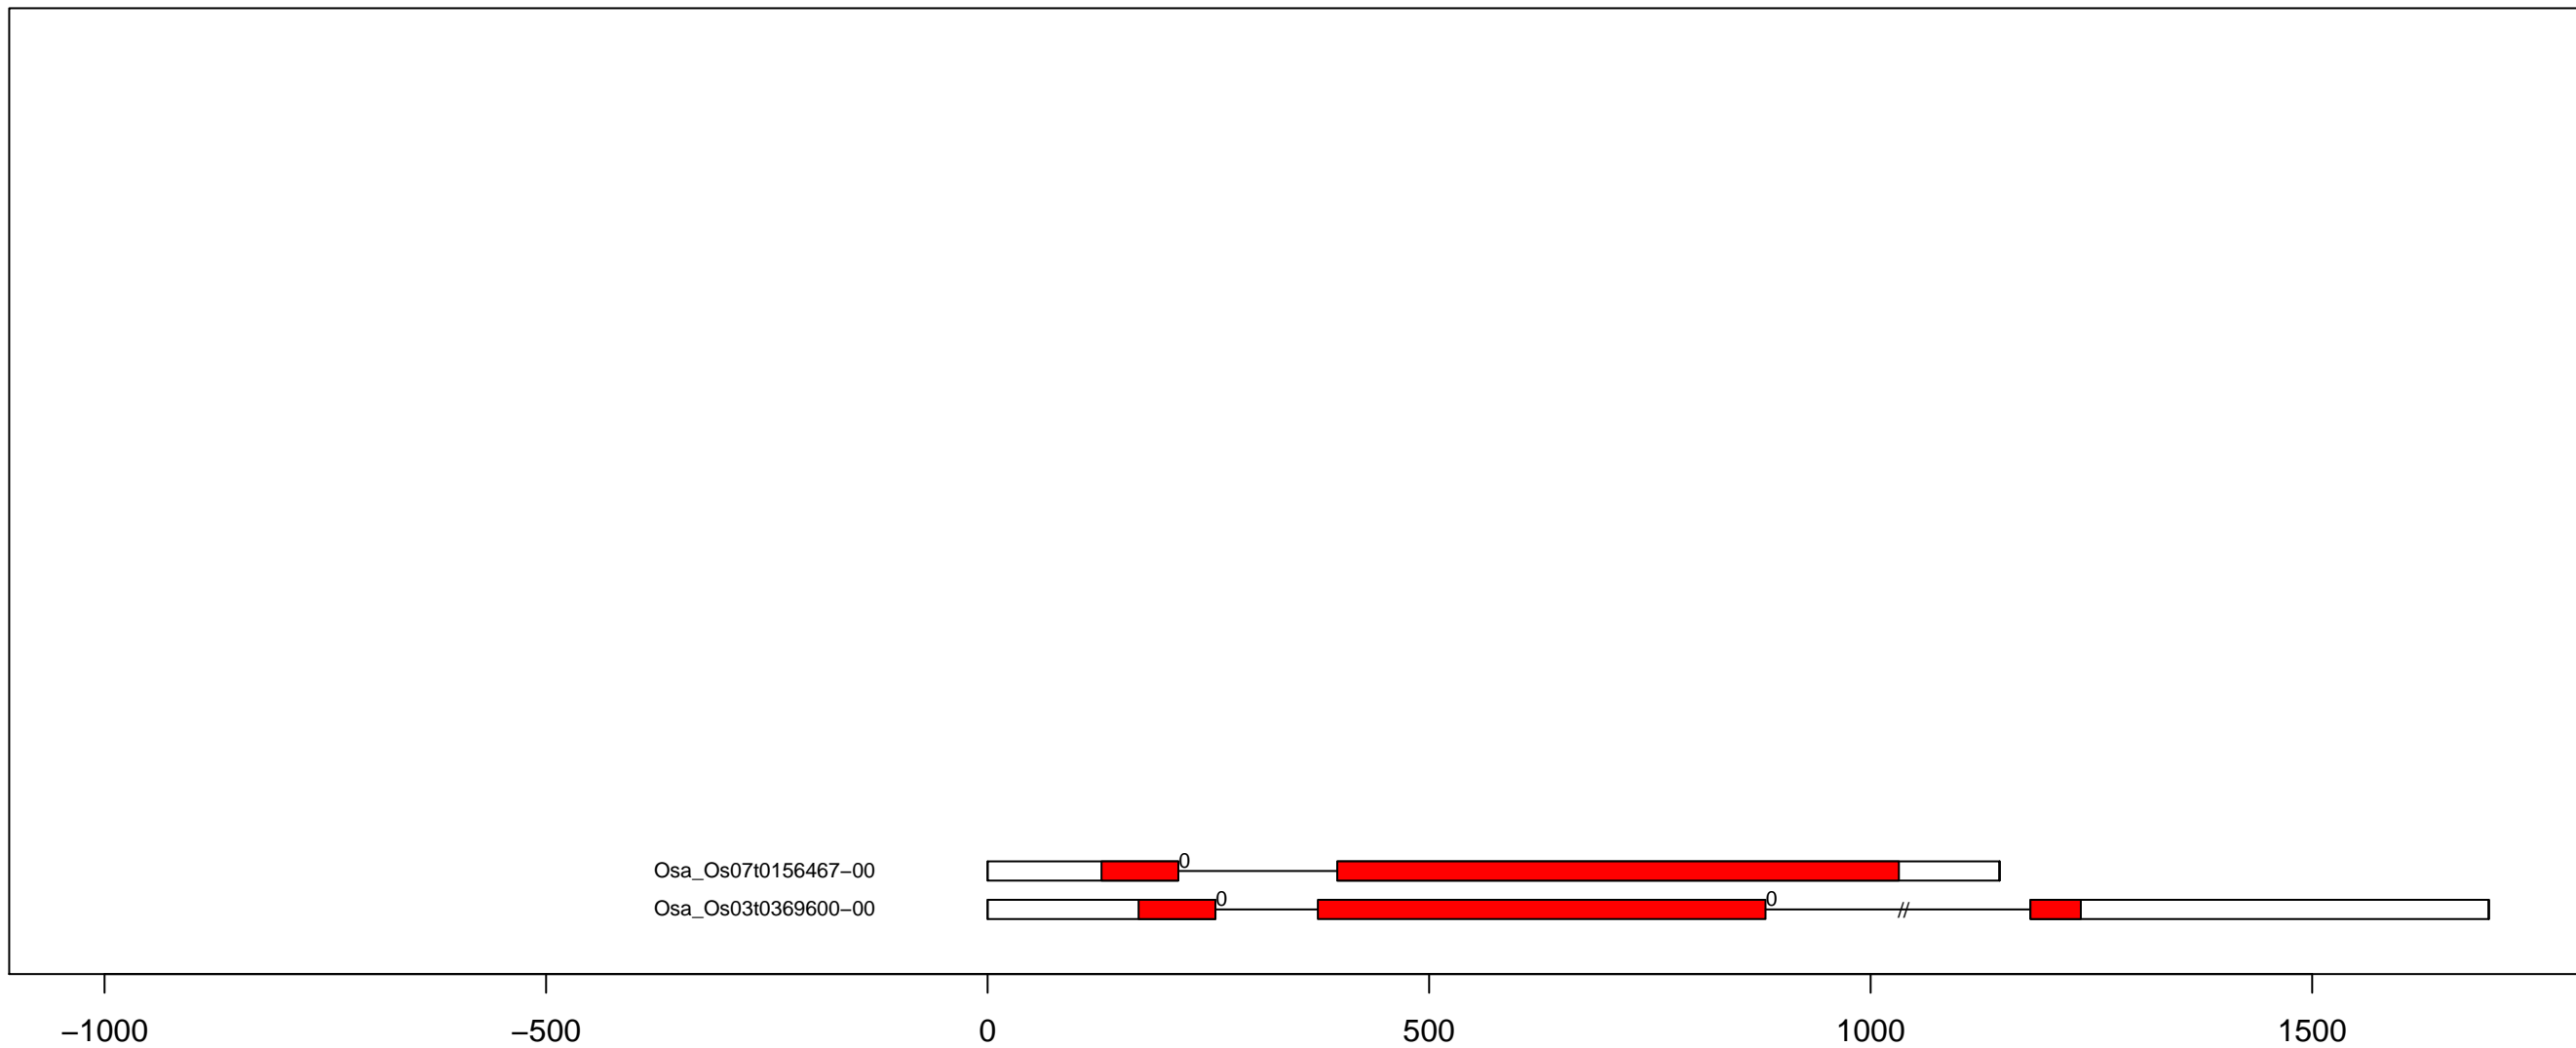



# O.sa class III peroxidase II subfamily exon-intron and prx domain diagram (all)

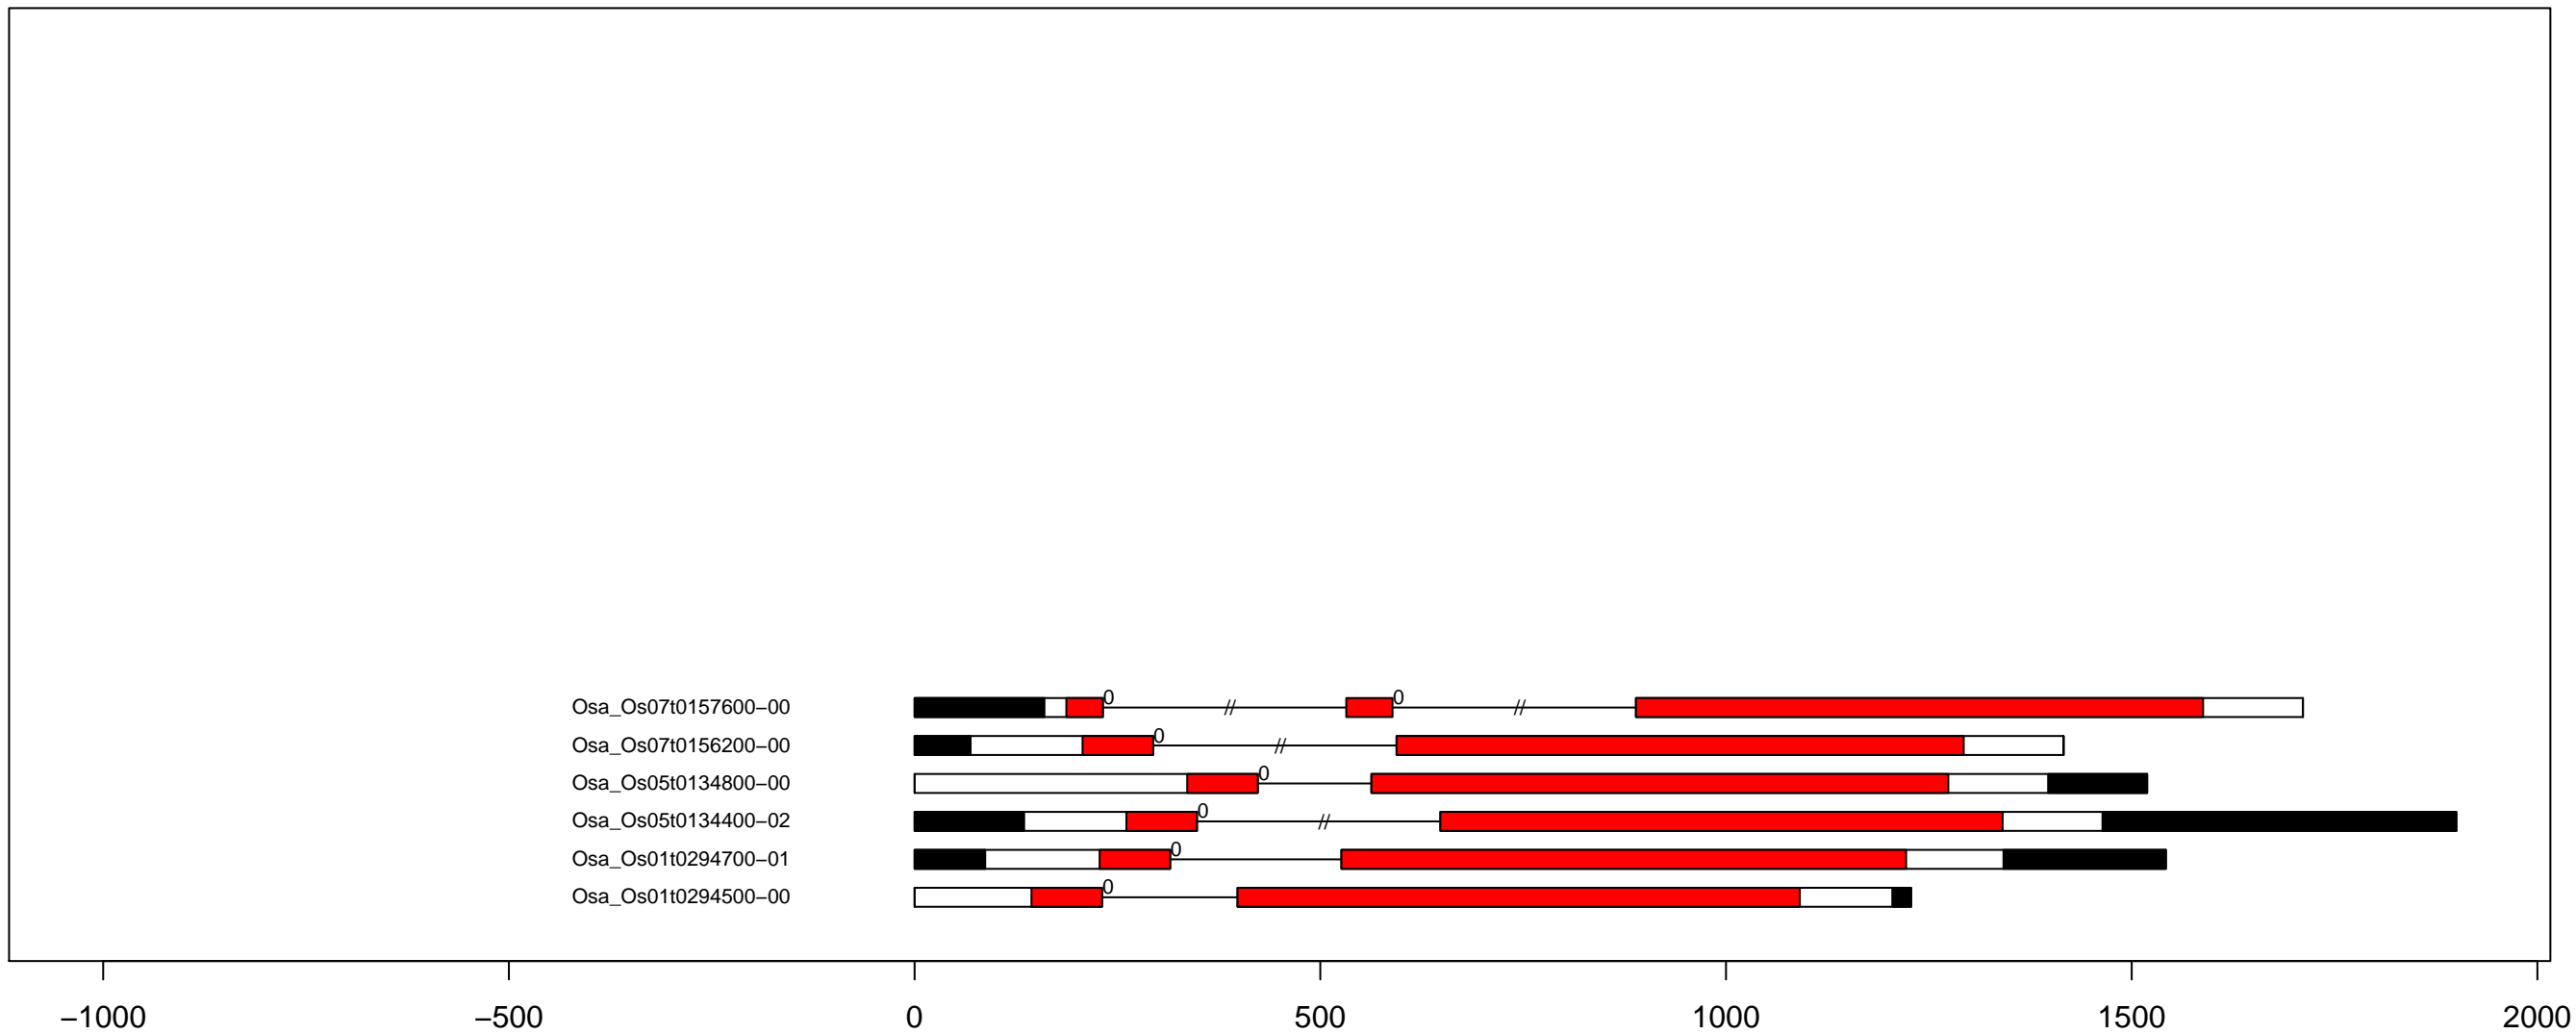

# O.sa class III peroxidase III subfamily exon-intron and prx domain diagram (all)

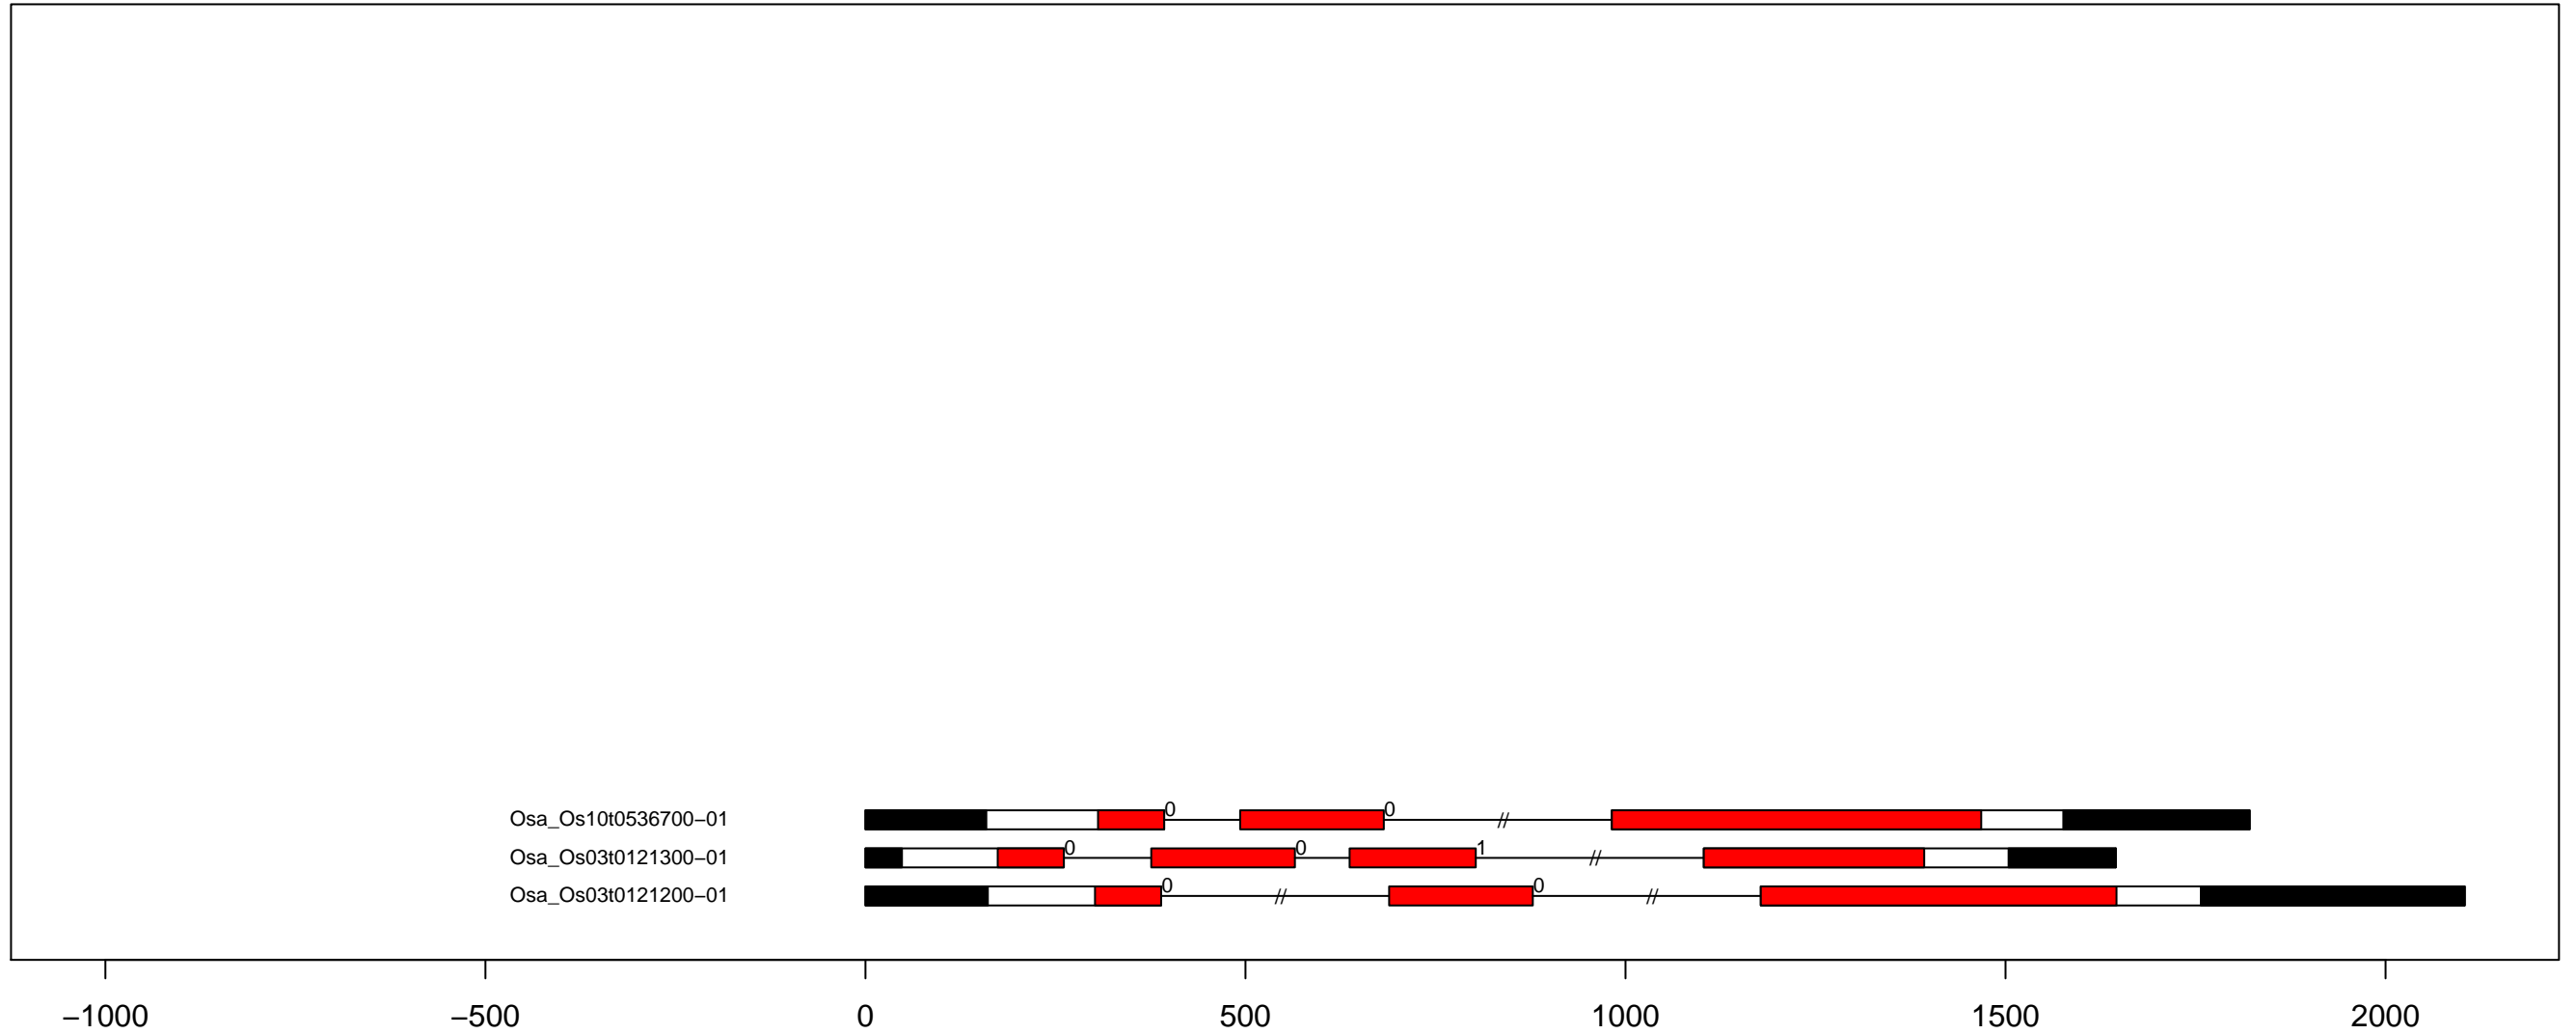

### O.sa class III peroxidase V subfamily exon-intron and prx domain diagram (all)

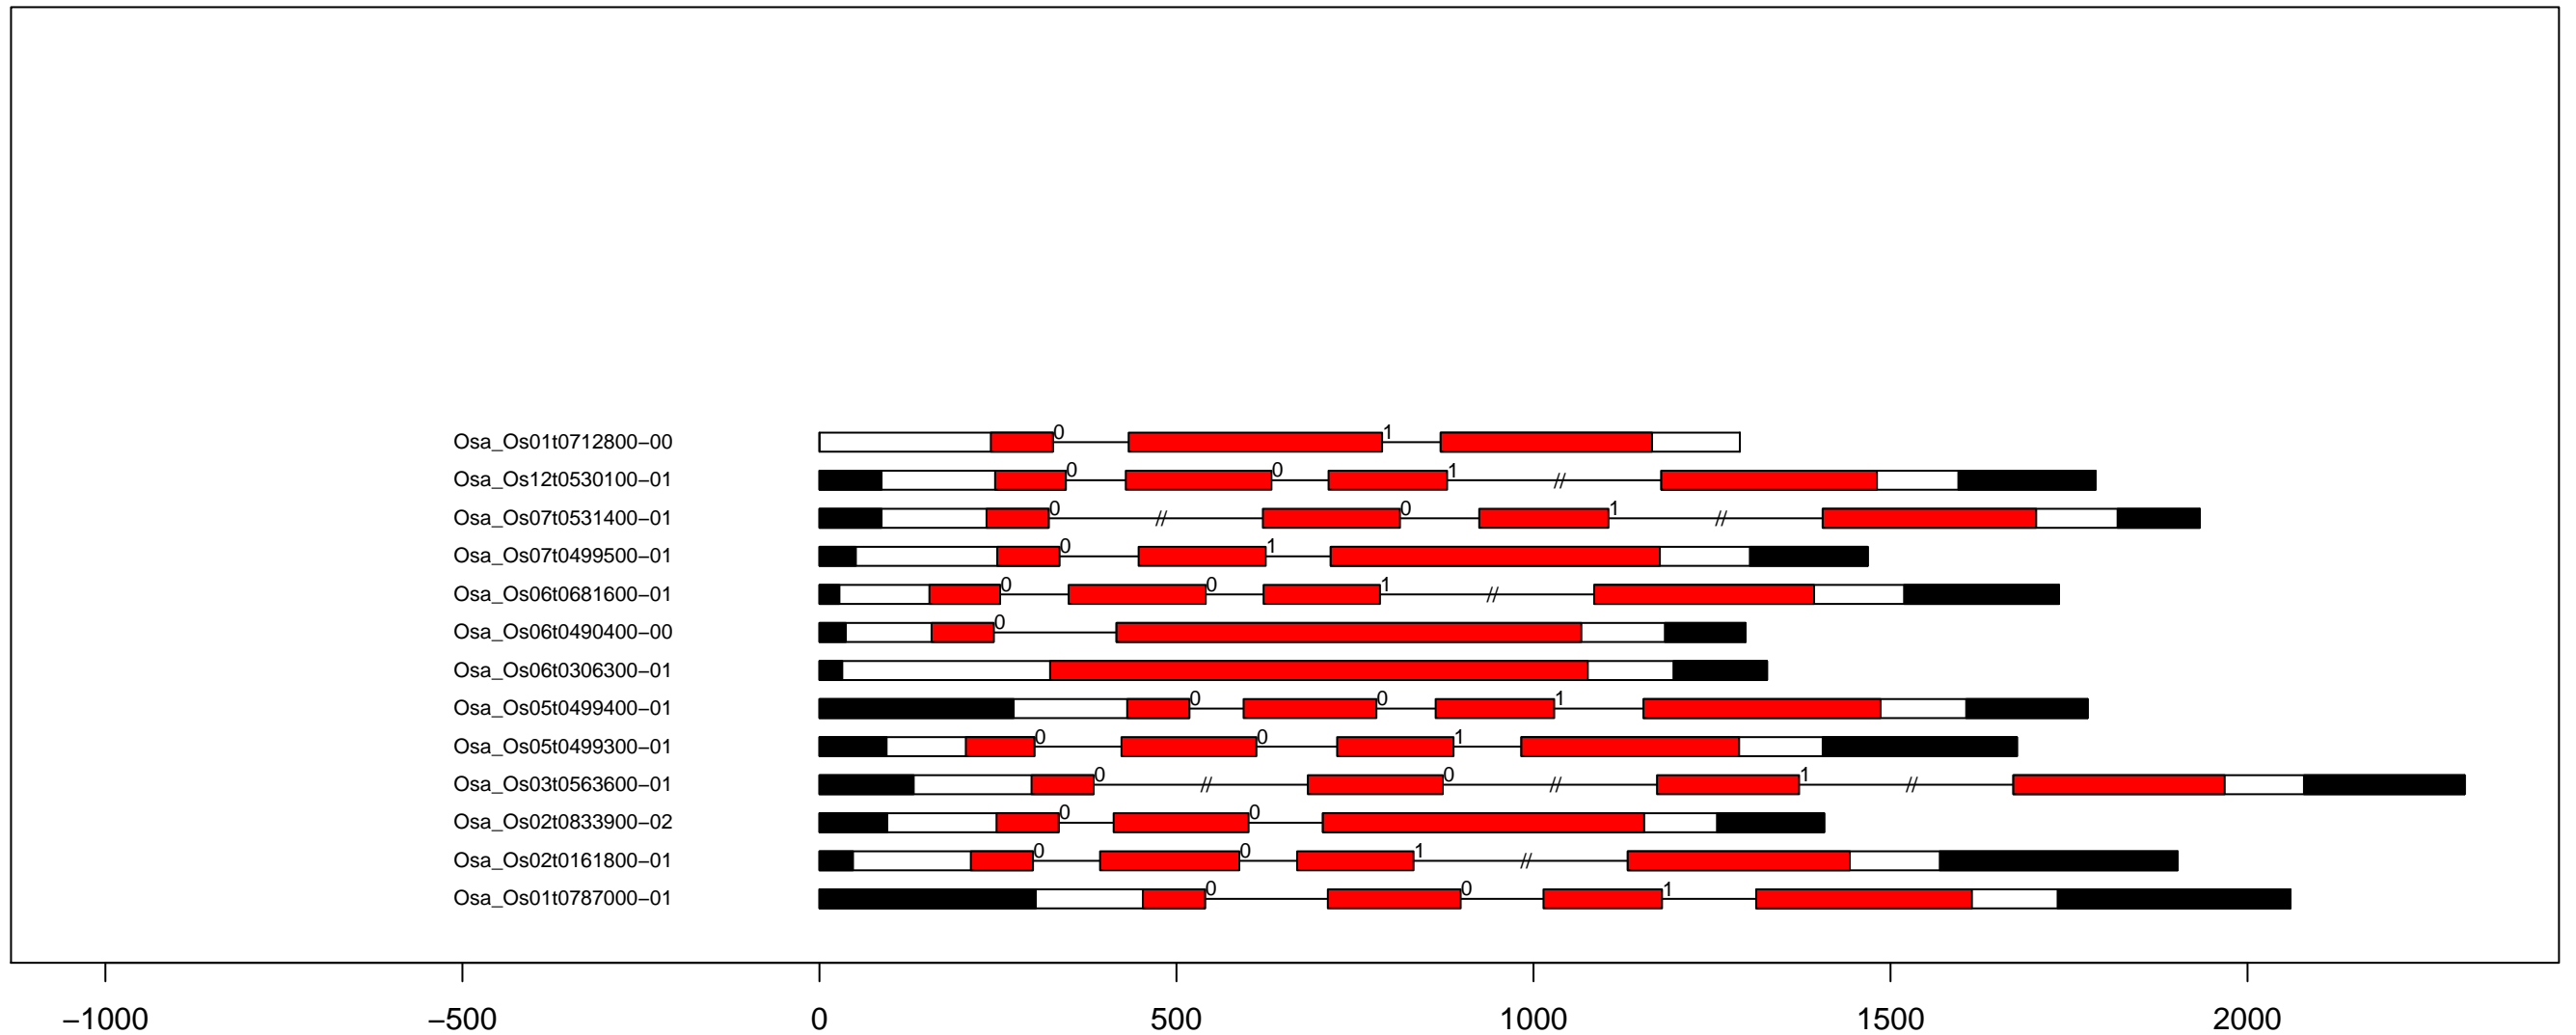

# O.sa class III peroxidase VI subfamily exon-intron and prx domain diagram (all)

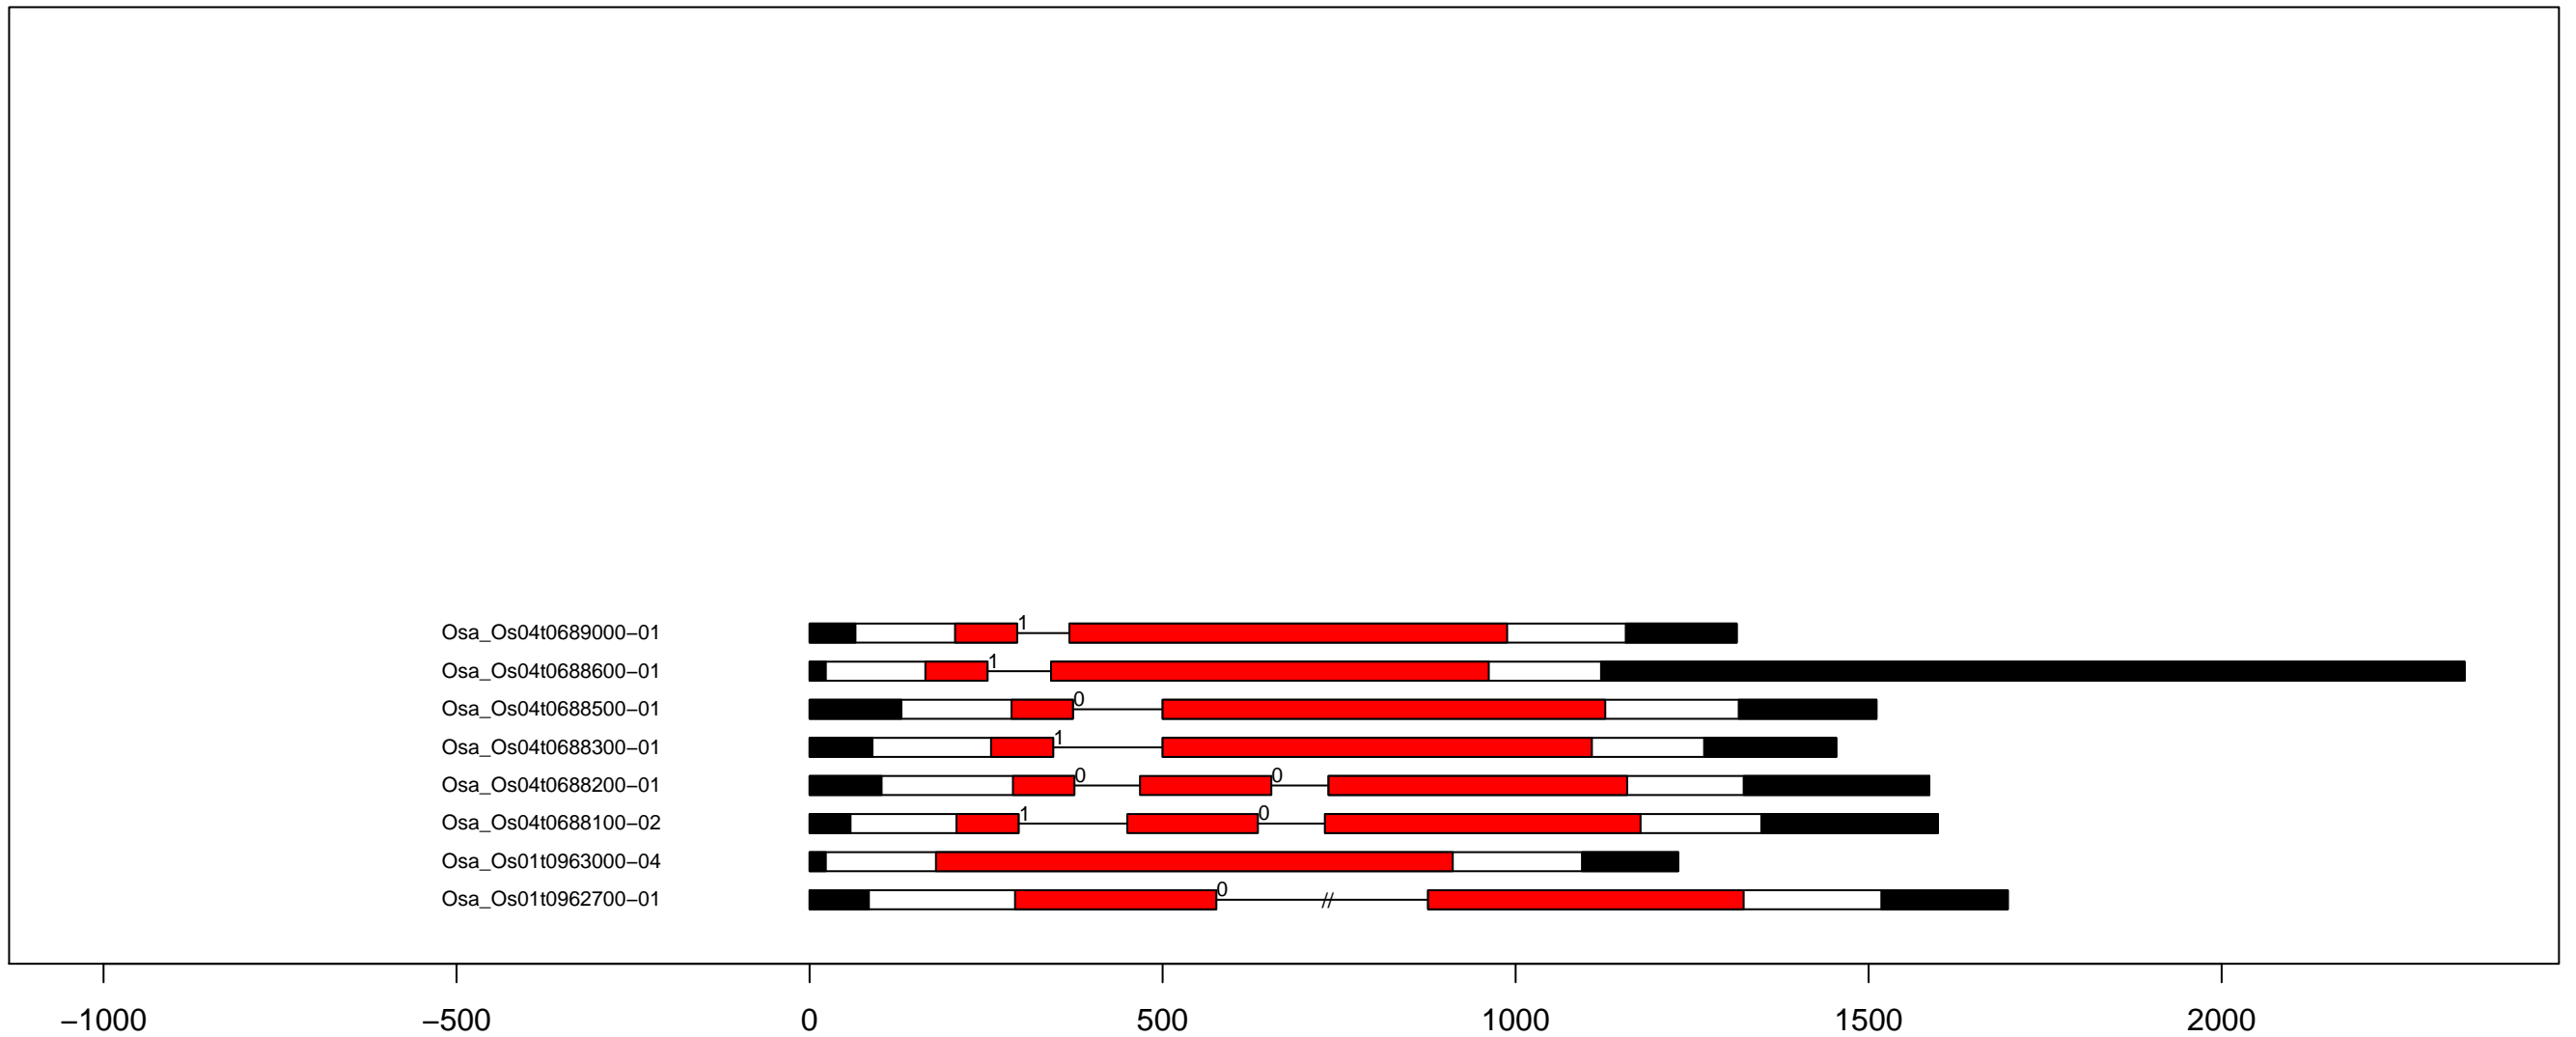

# O.sa class III peroxidase VII subfamily exon-intron and prx domain diagram (all)

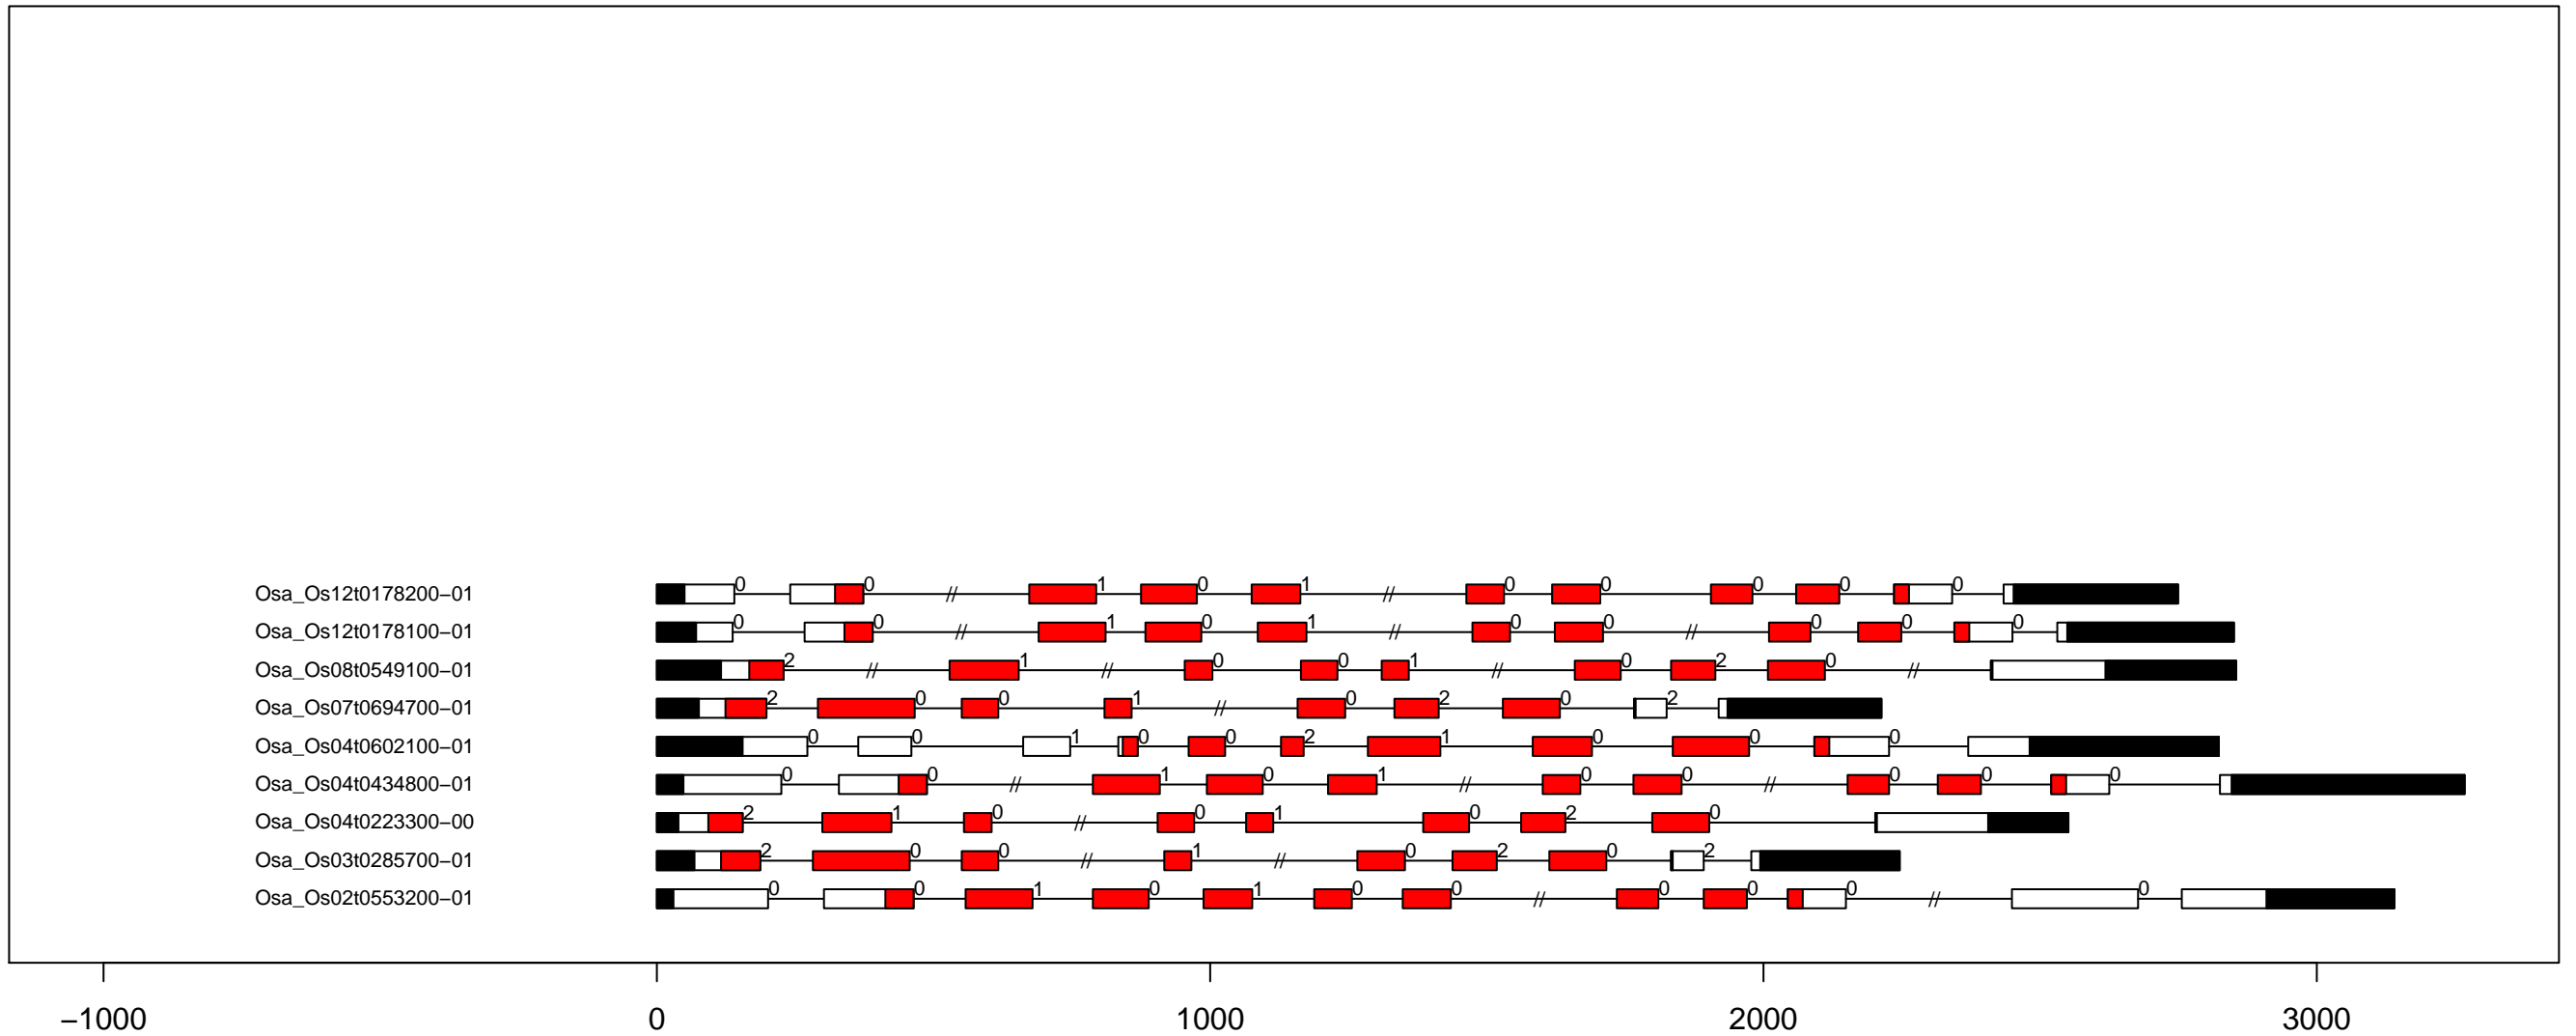

### O.sa class III peroxidase IX subfamily exon-intron and prx domain diagram (all)

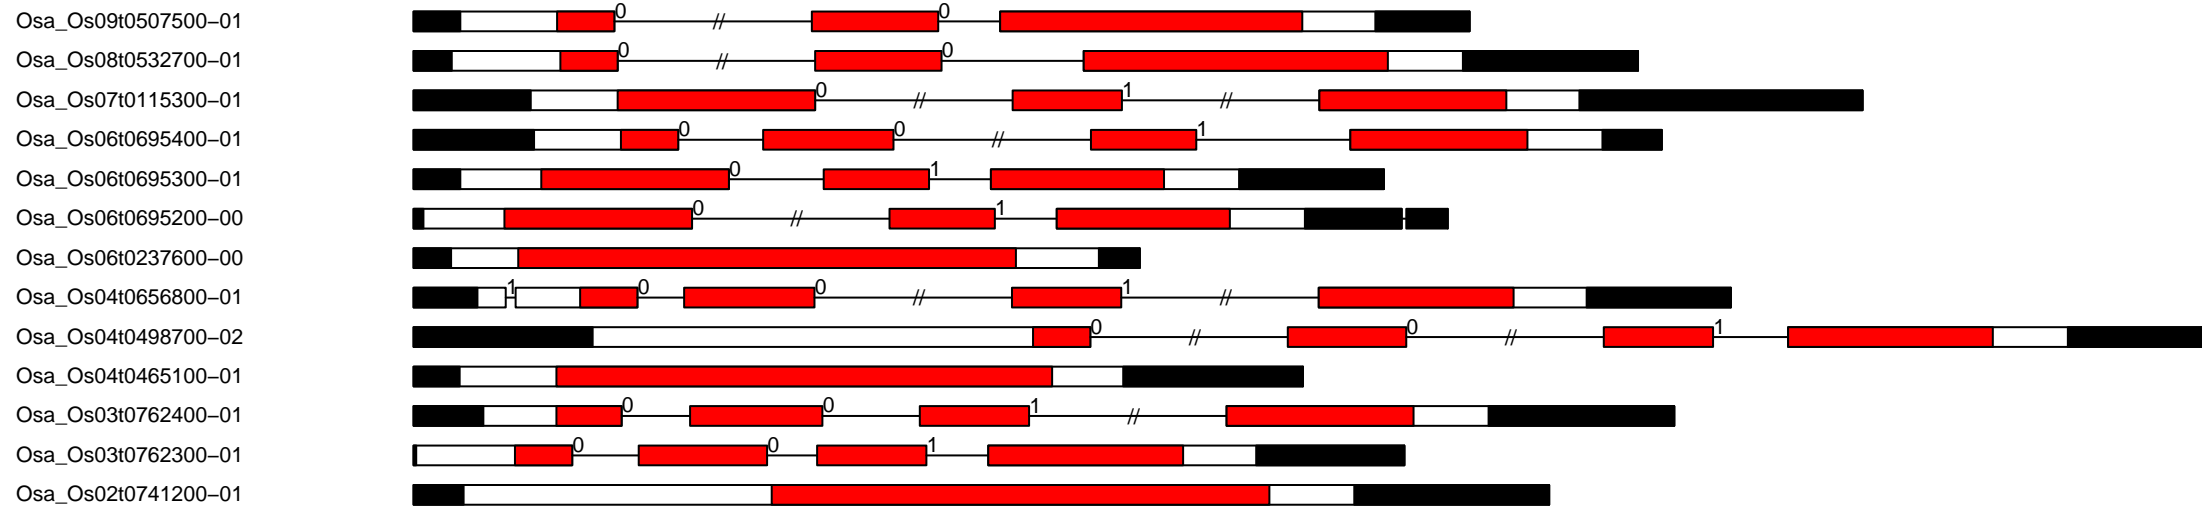

-1000

0

1000

2000

# O.sa class III peroxidase X subfamily exon-intron and prx domain diagram (all)

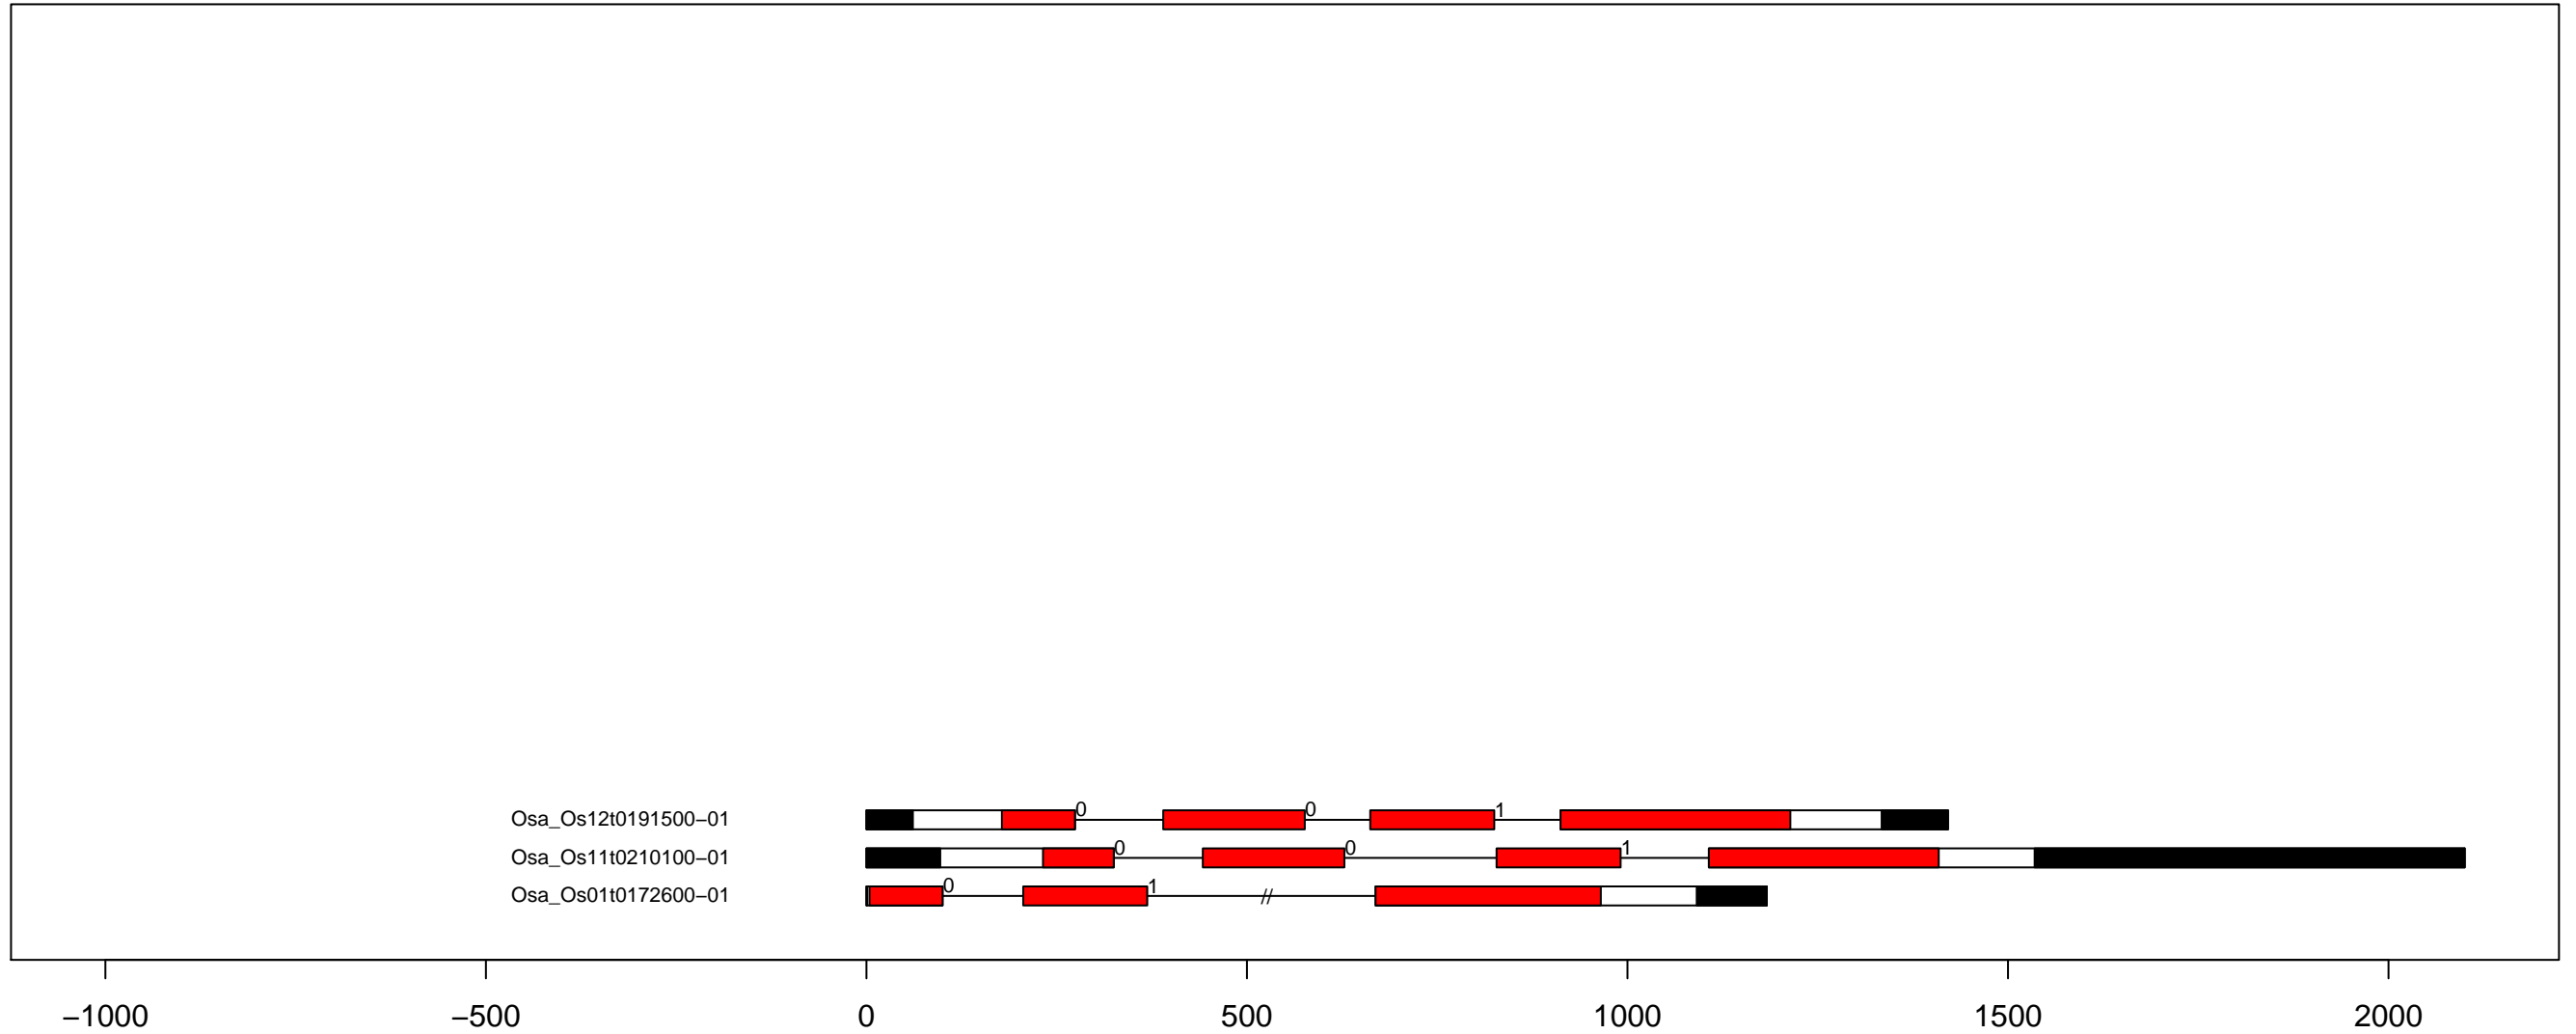

# O.sa class III peroxidase XI subfamily exon-intron and prx domain diagram (all)

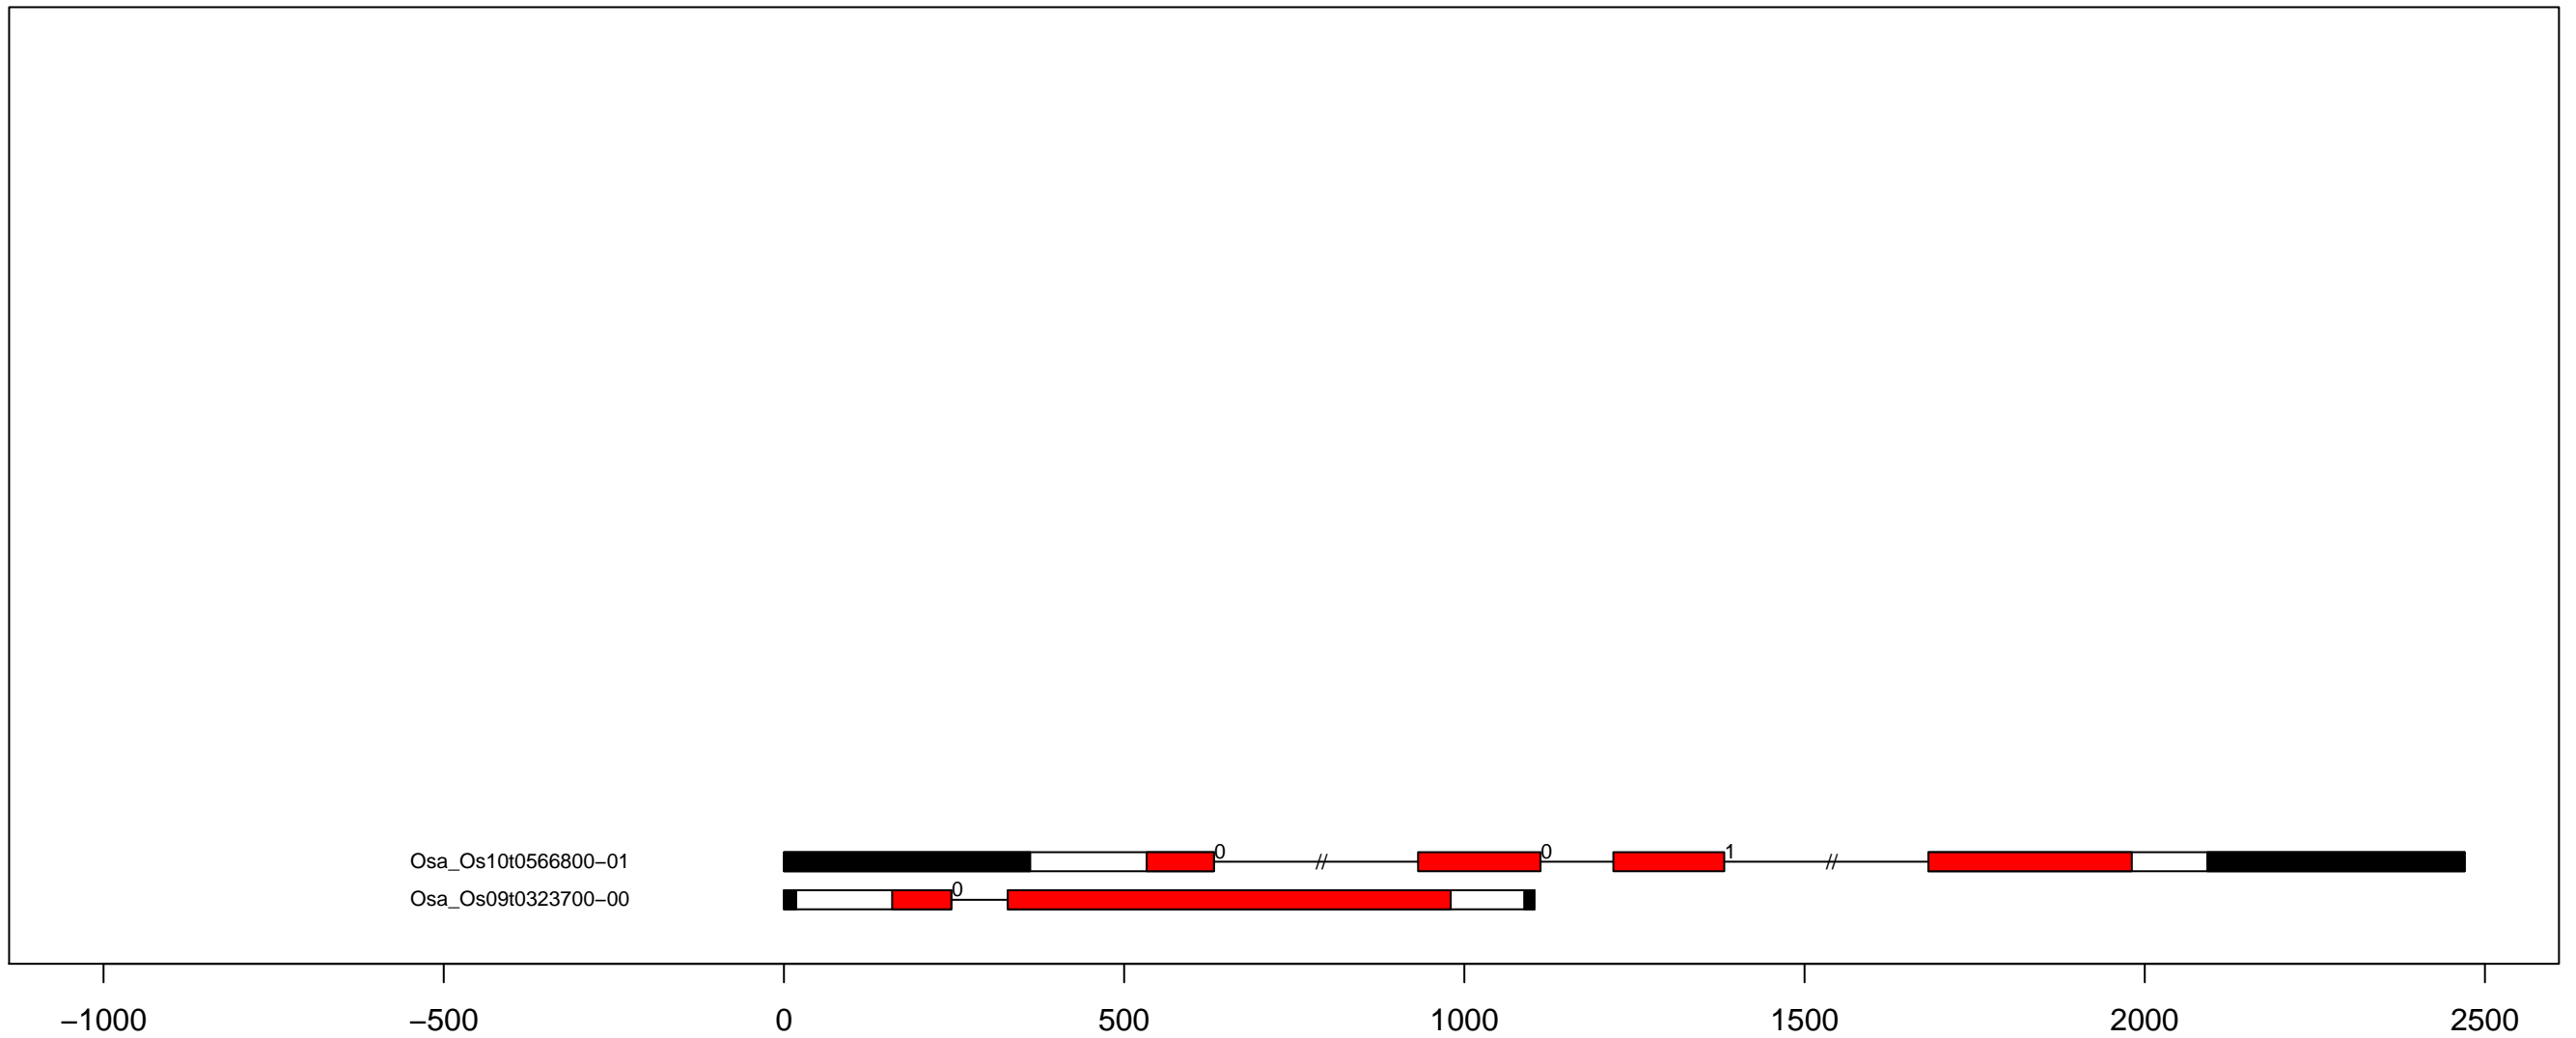



# O.sa class III peroxidase XII subfamily exon-intron and prx domain diagram (all)

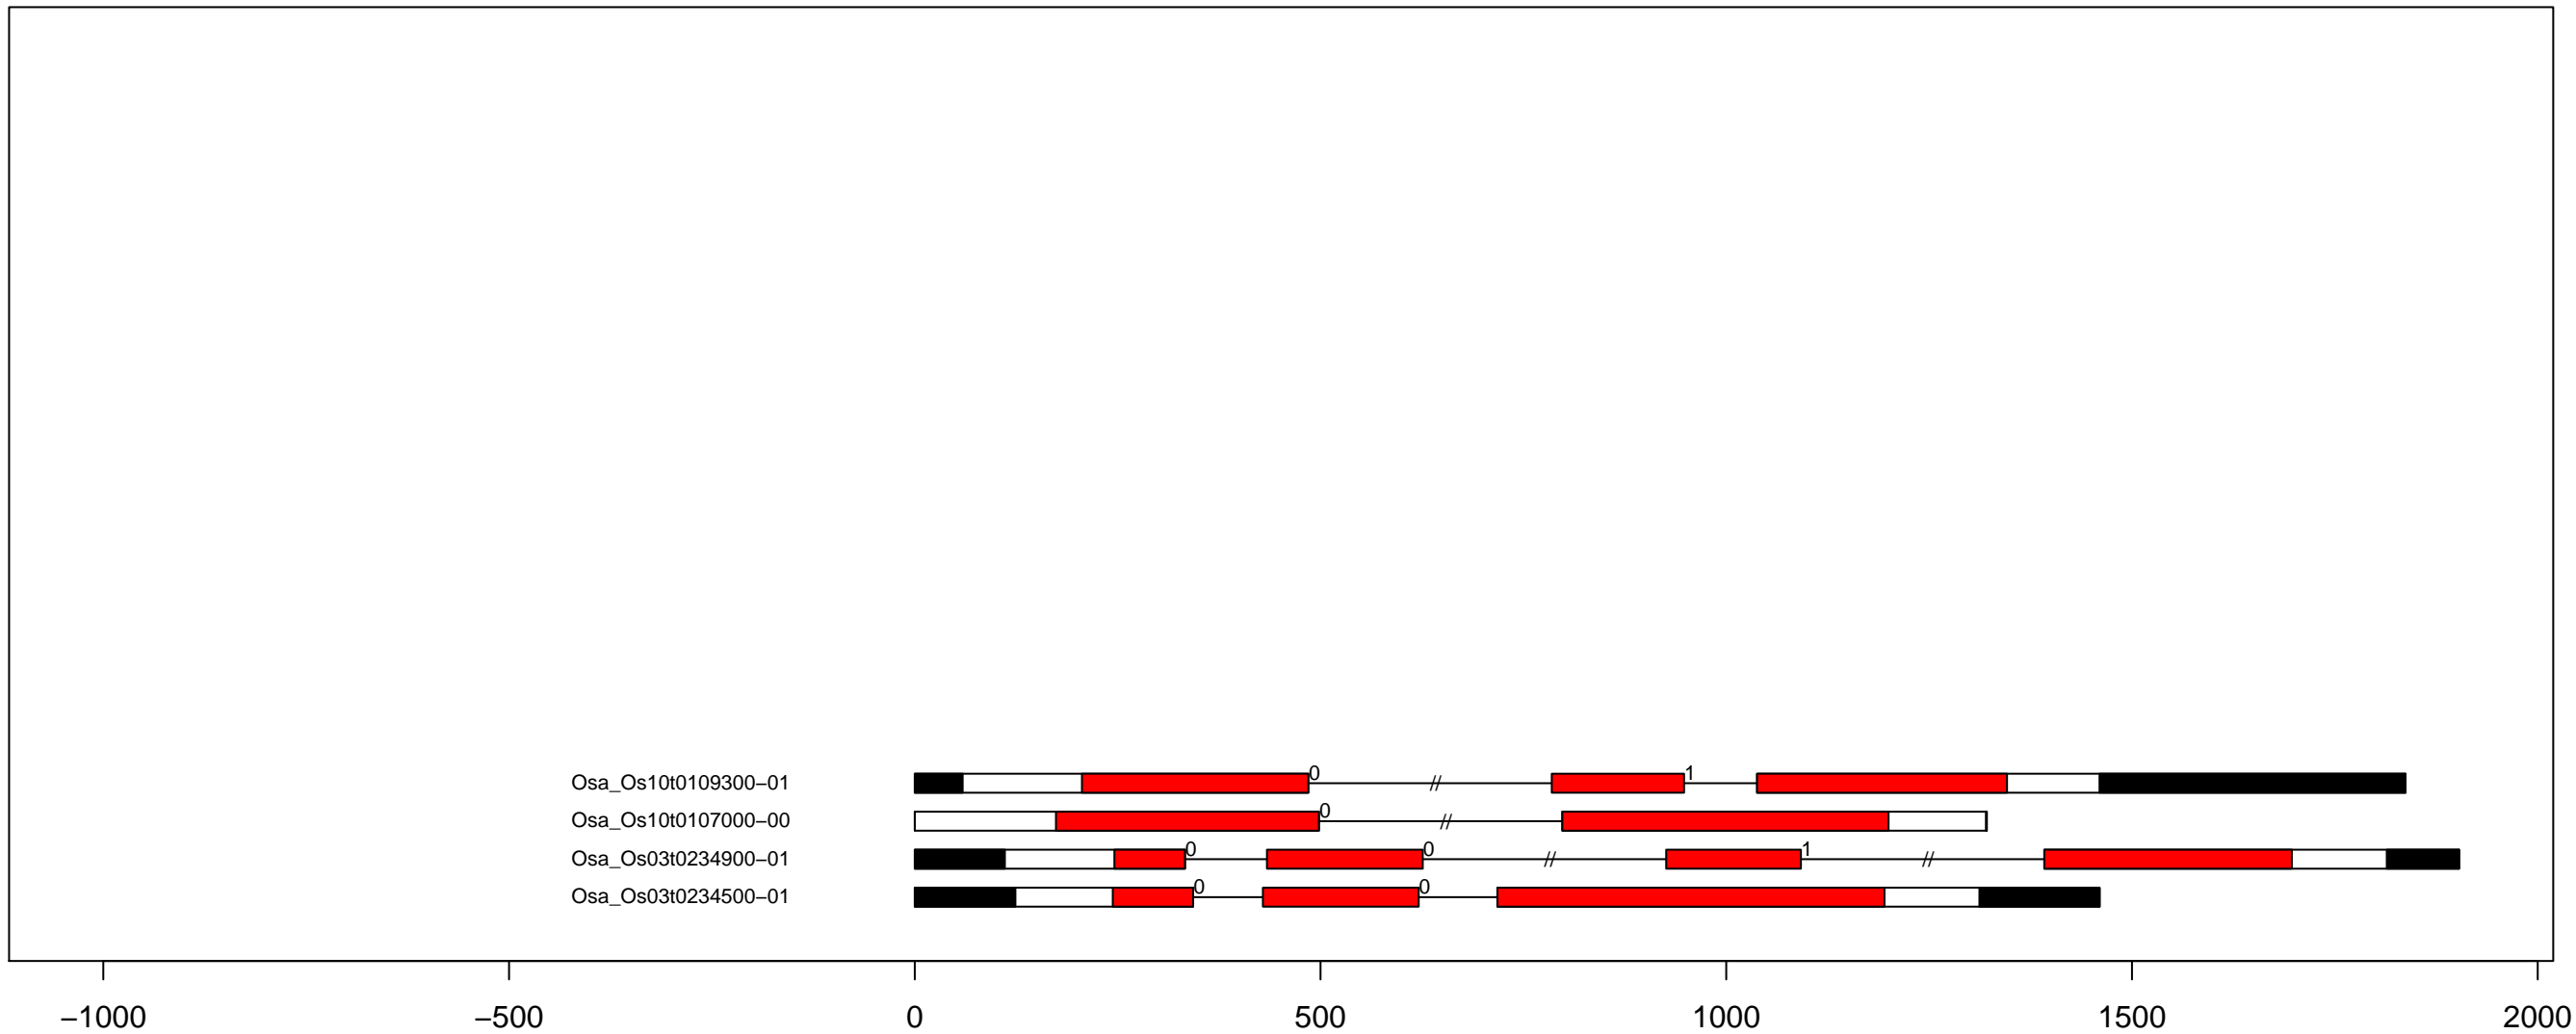

# O.sa class III peroxidase XIII subfamily exon-intron and prx domain diagram (all)

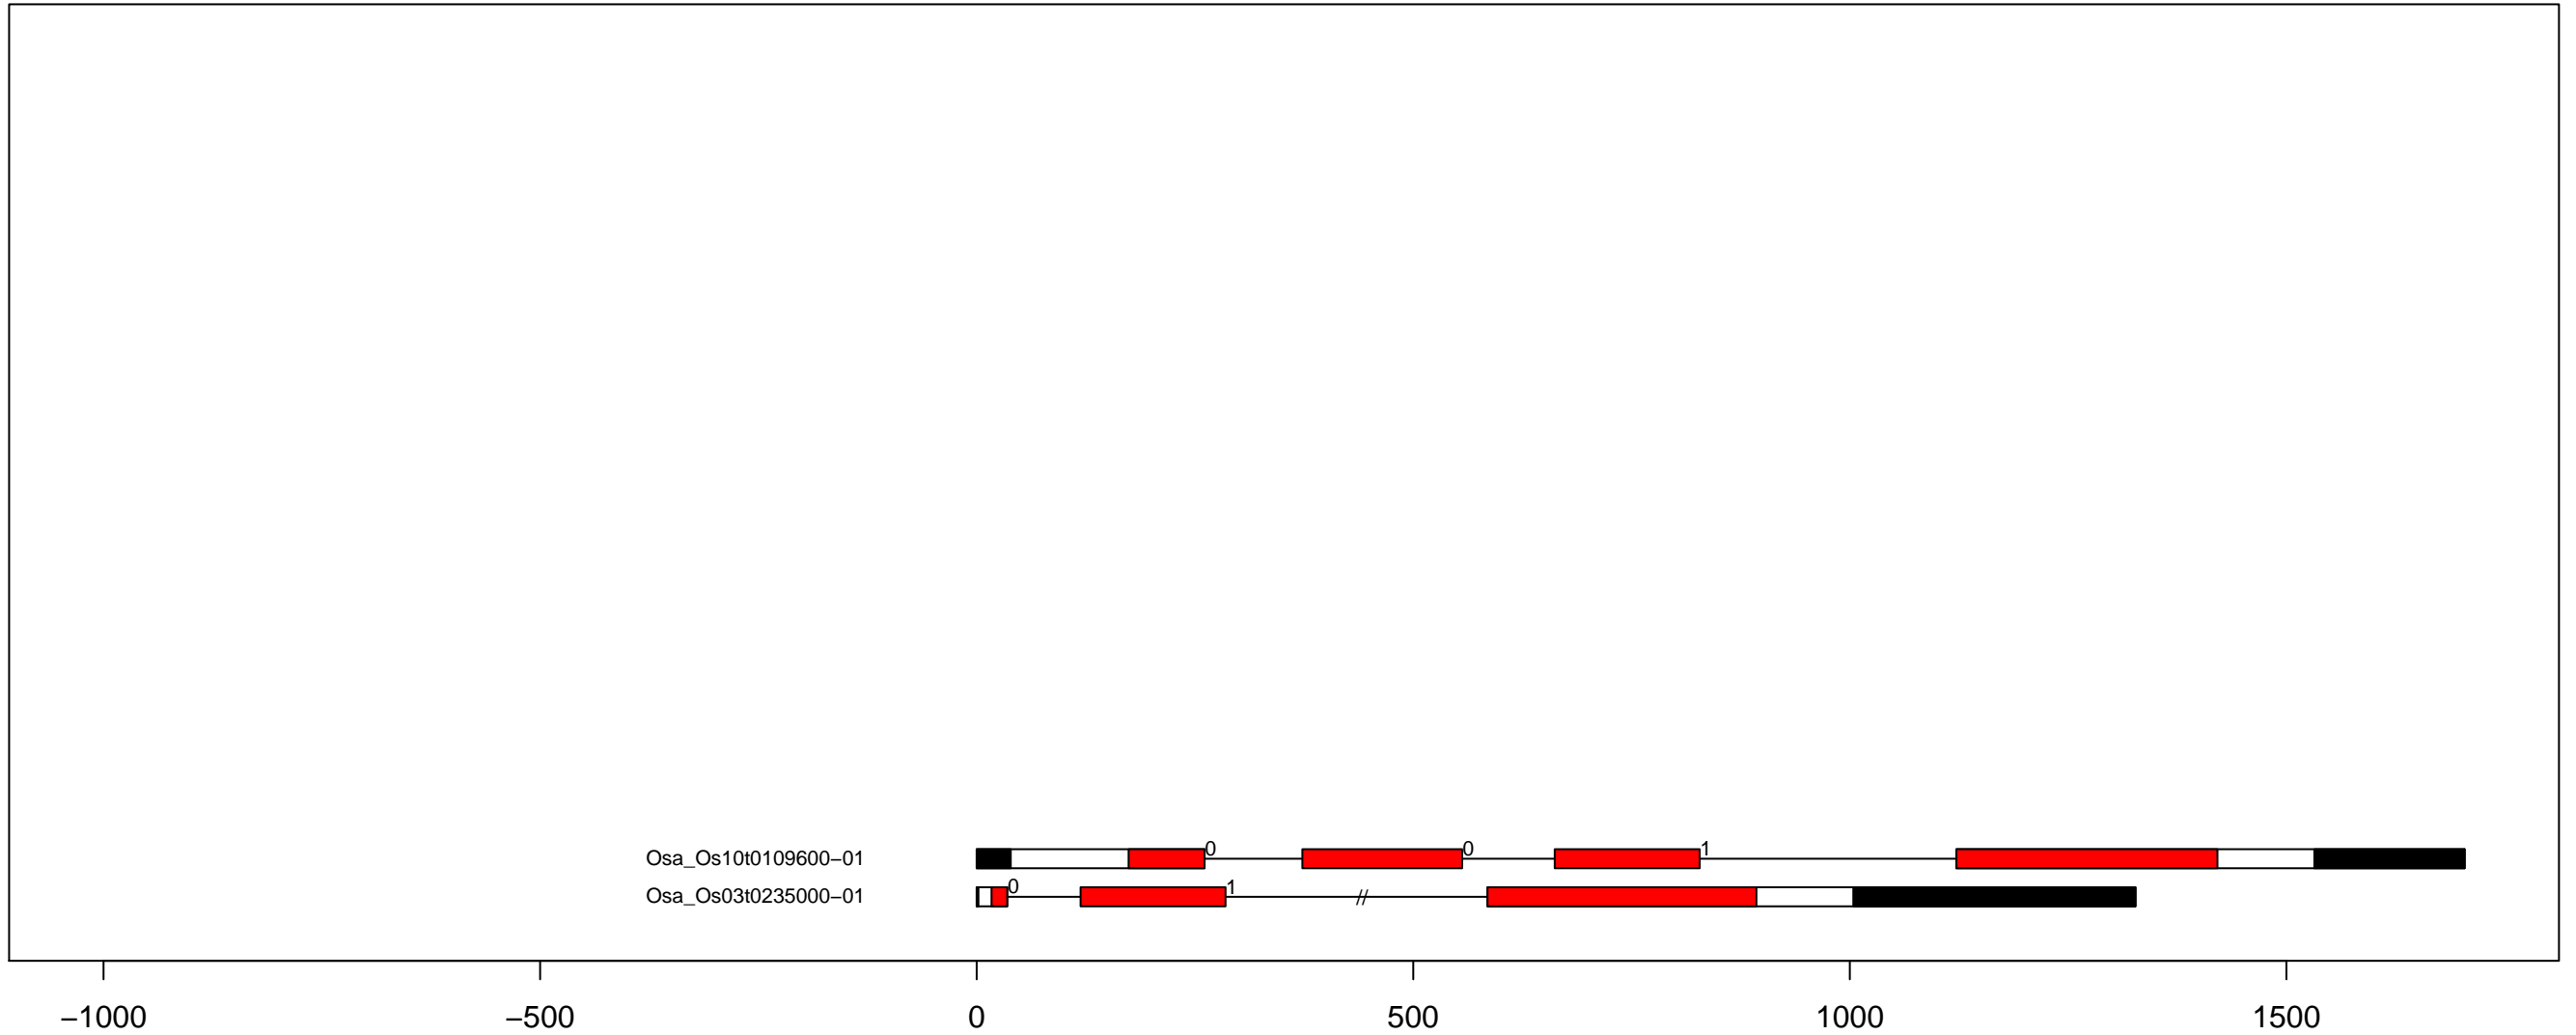

# O.sa class III peroxidase XIV subfamily exon-intron and prx domain diagram (all)

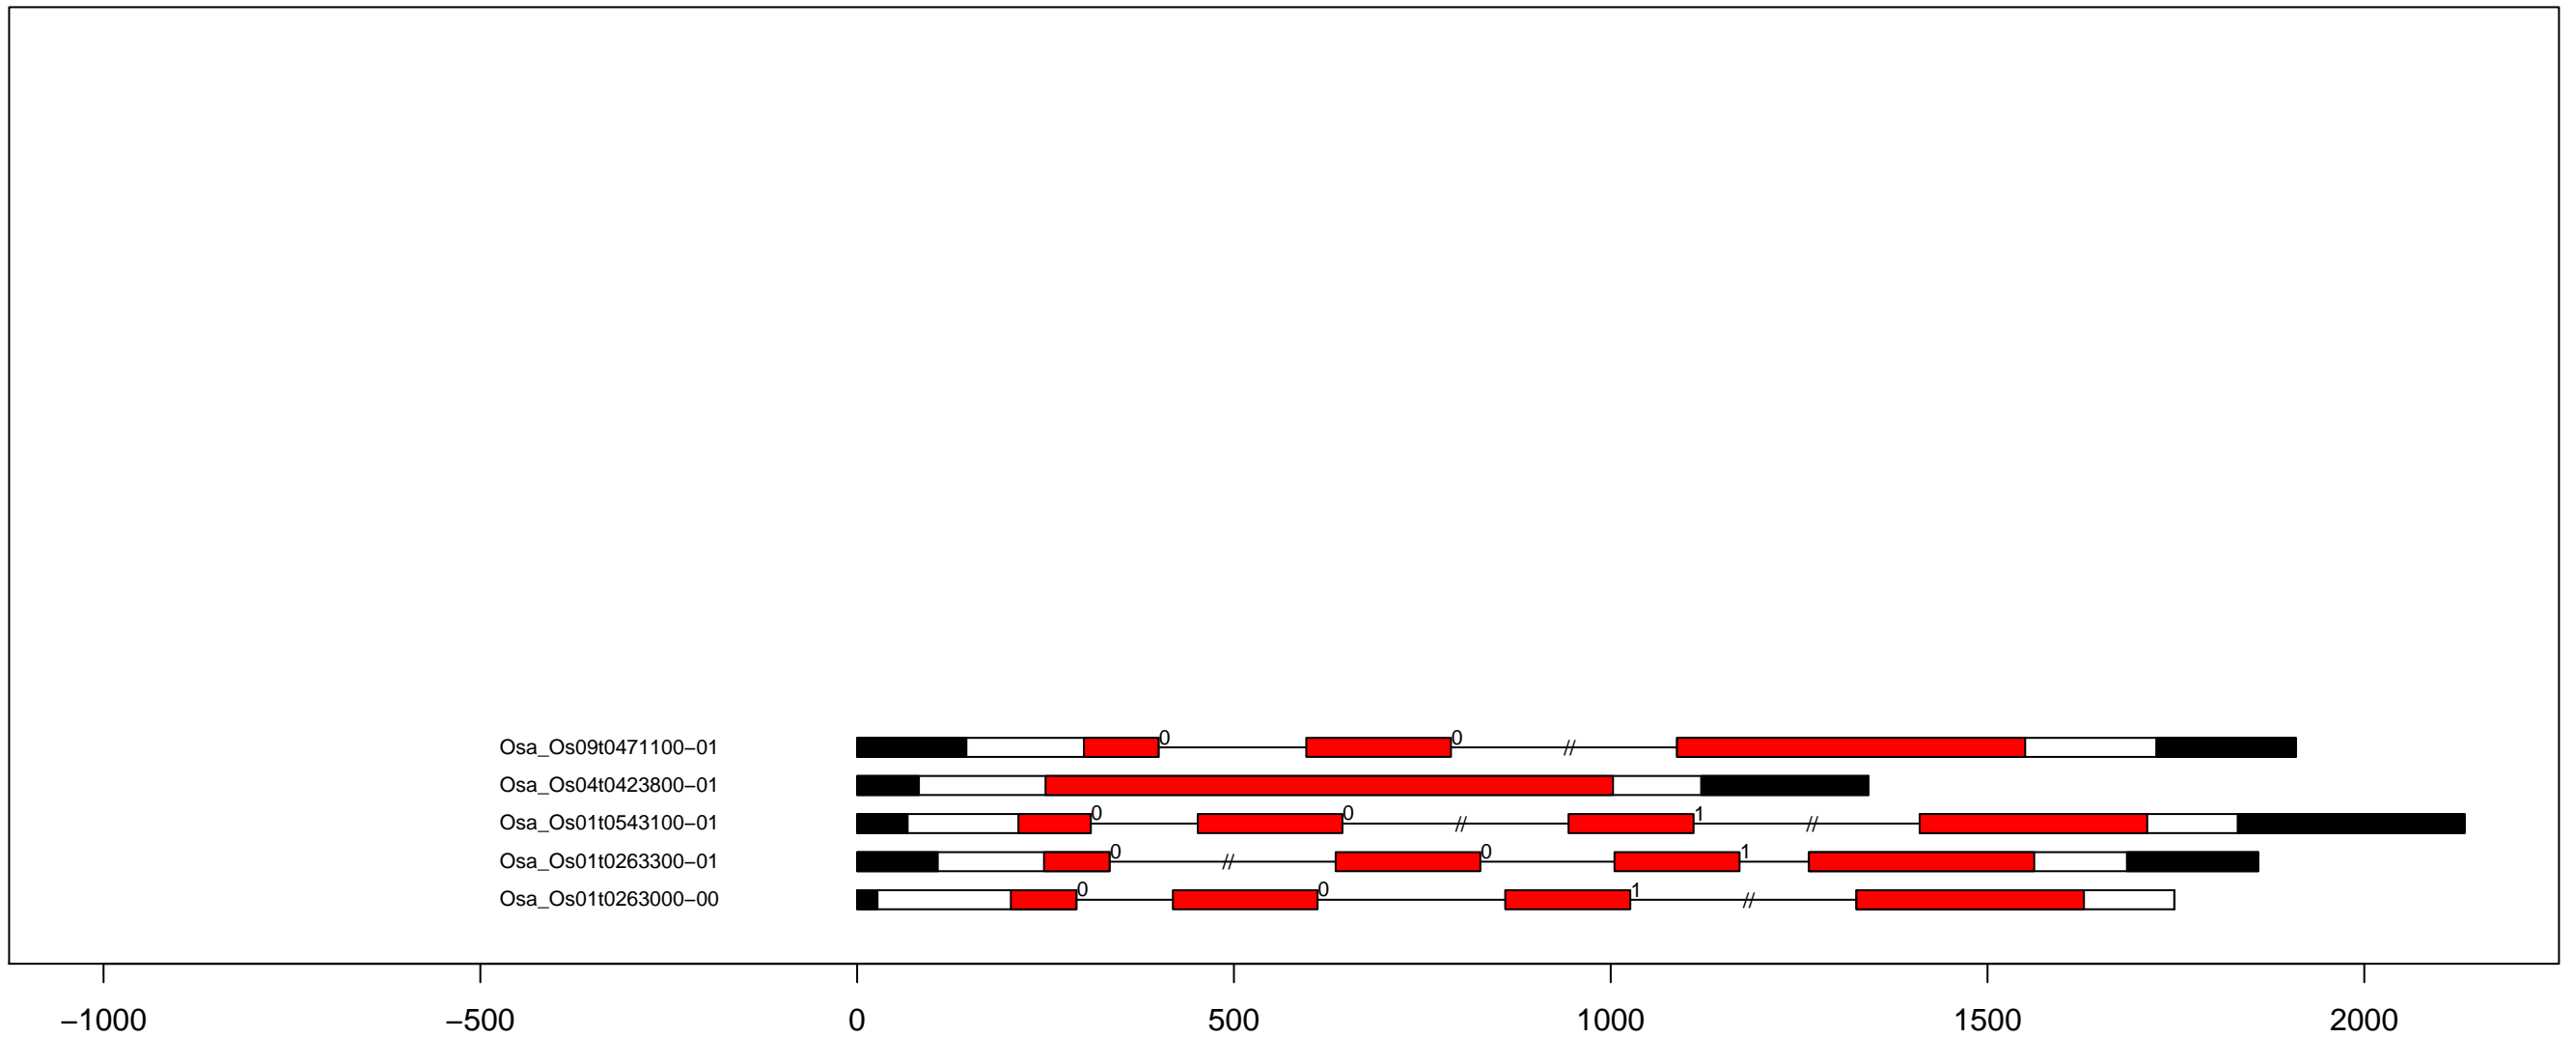

# O.sa class III peroxidase XV subfamily exon-intron and prx domain diagram (all)

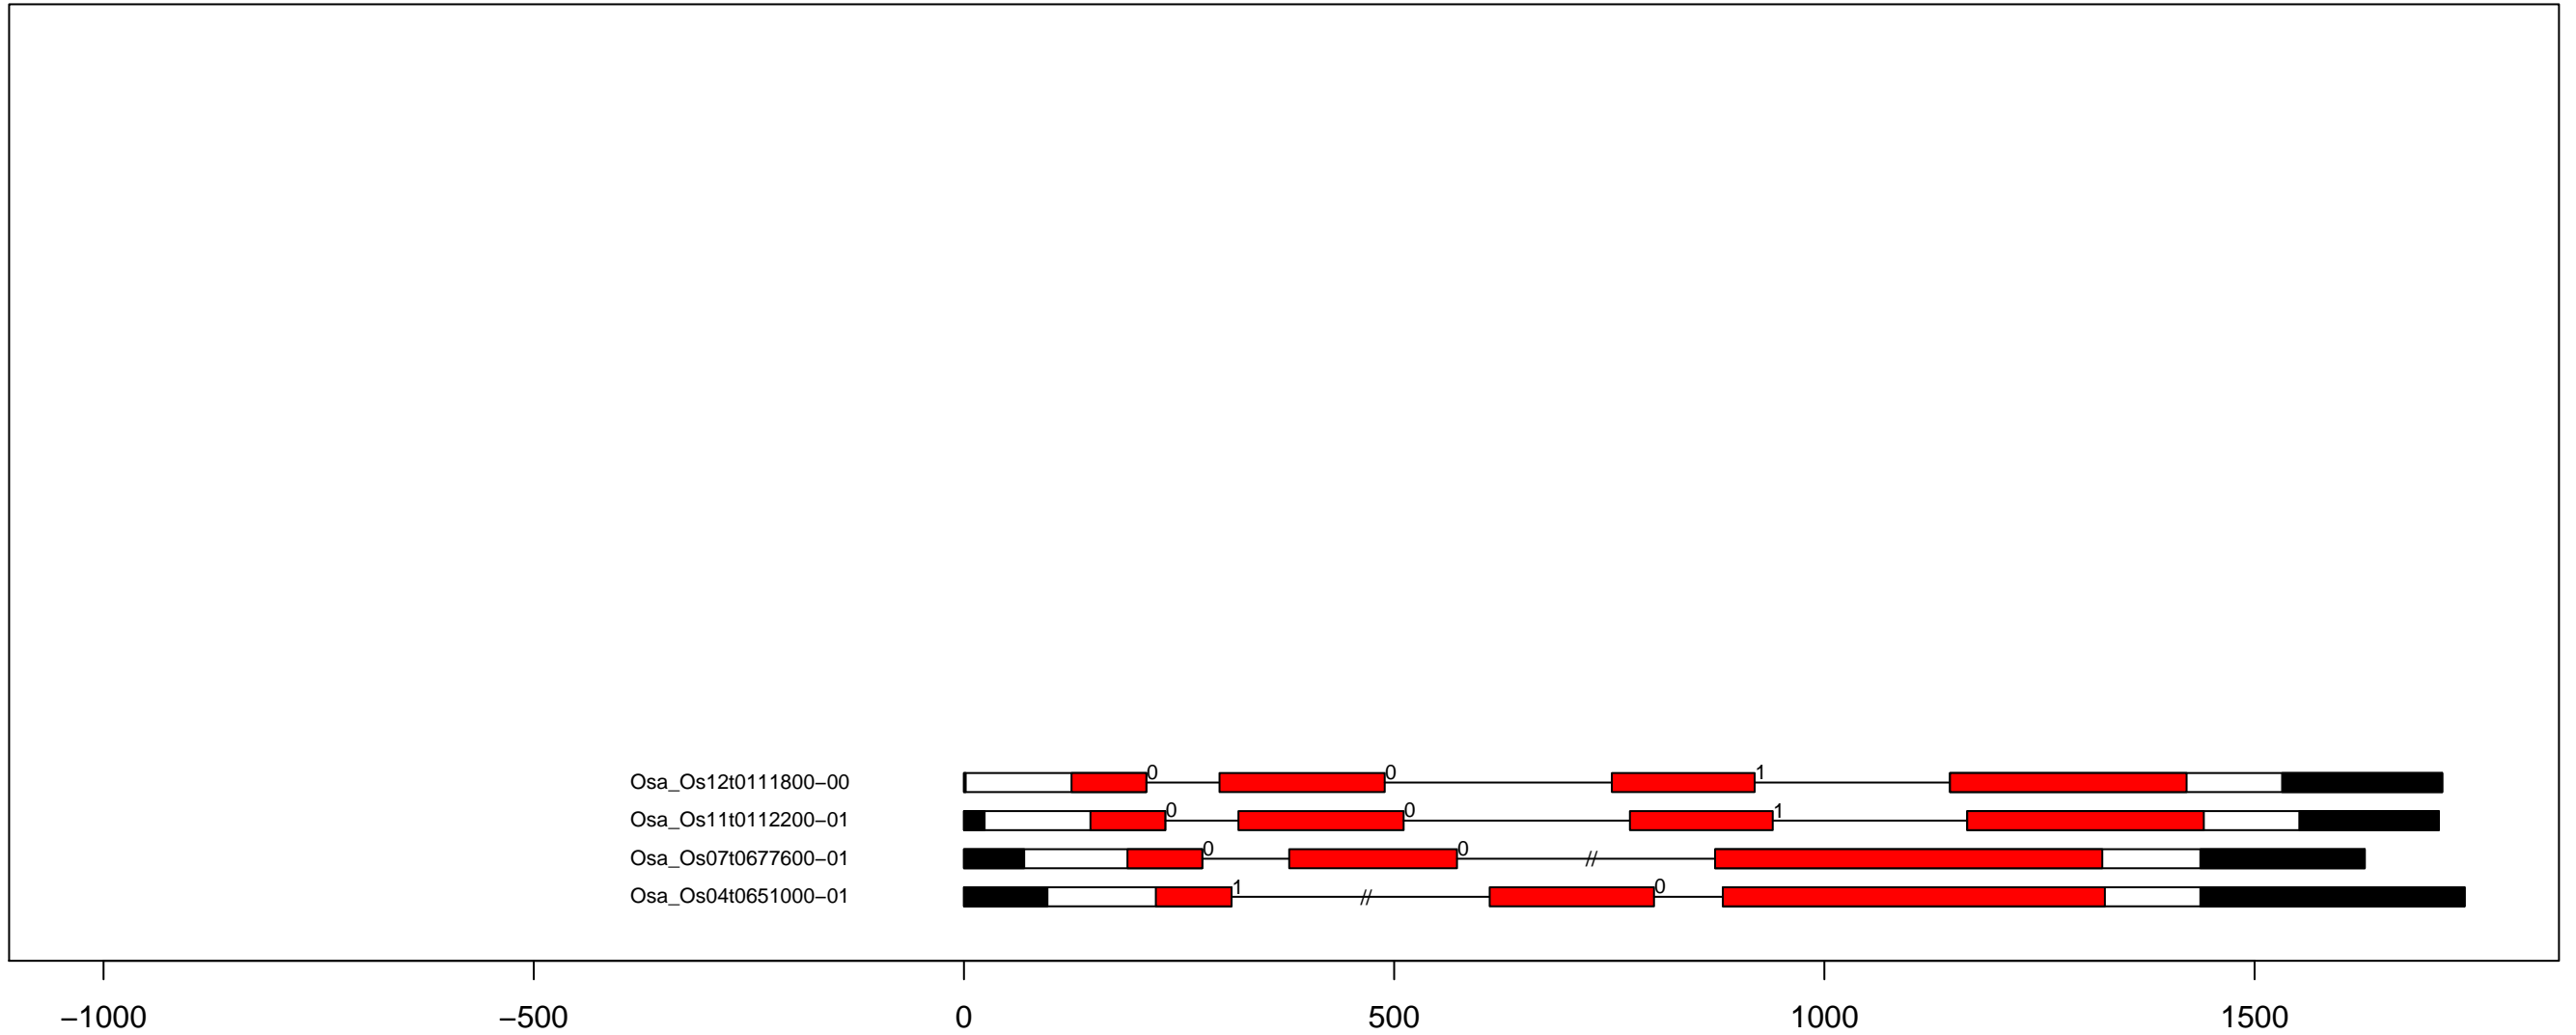

# O.sa class III peroxidase XVI subfamily exon-intron and prx domain diagram (all)

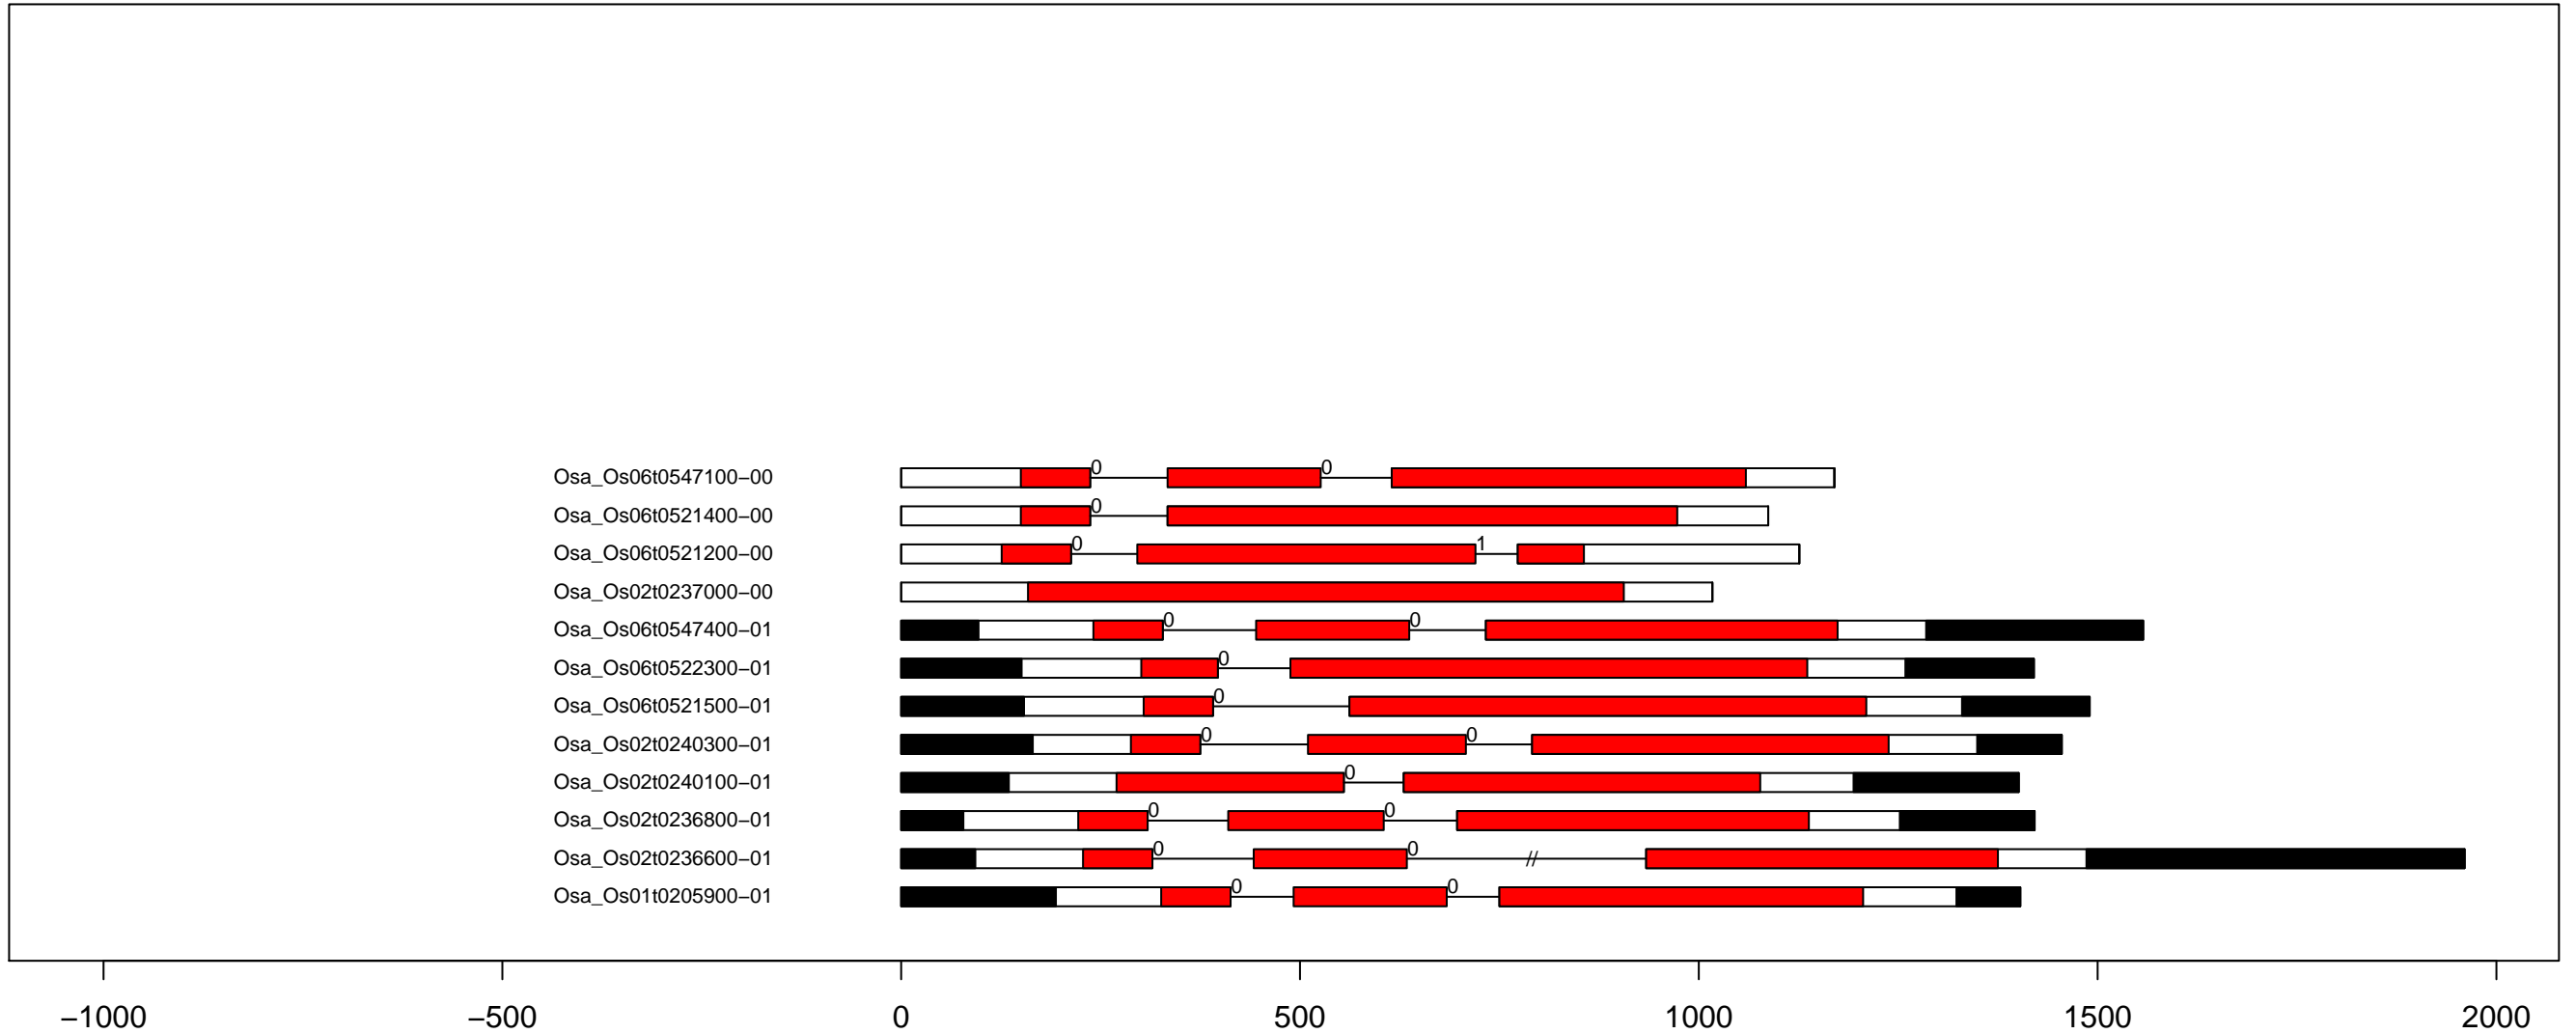

# O.sa class III peroxidase XVII subfamily exon-intron and prx domain diagram (all)

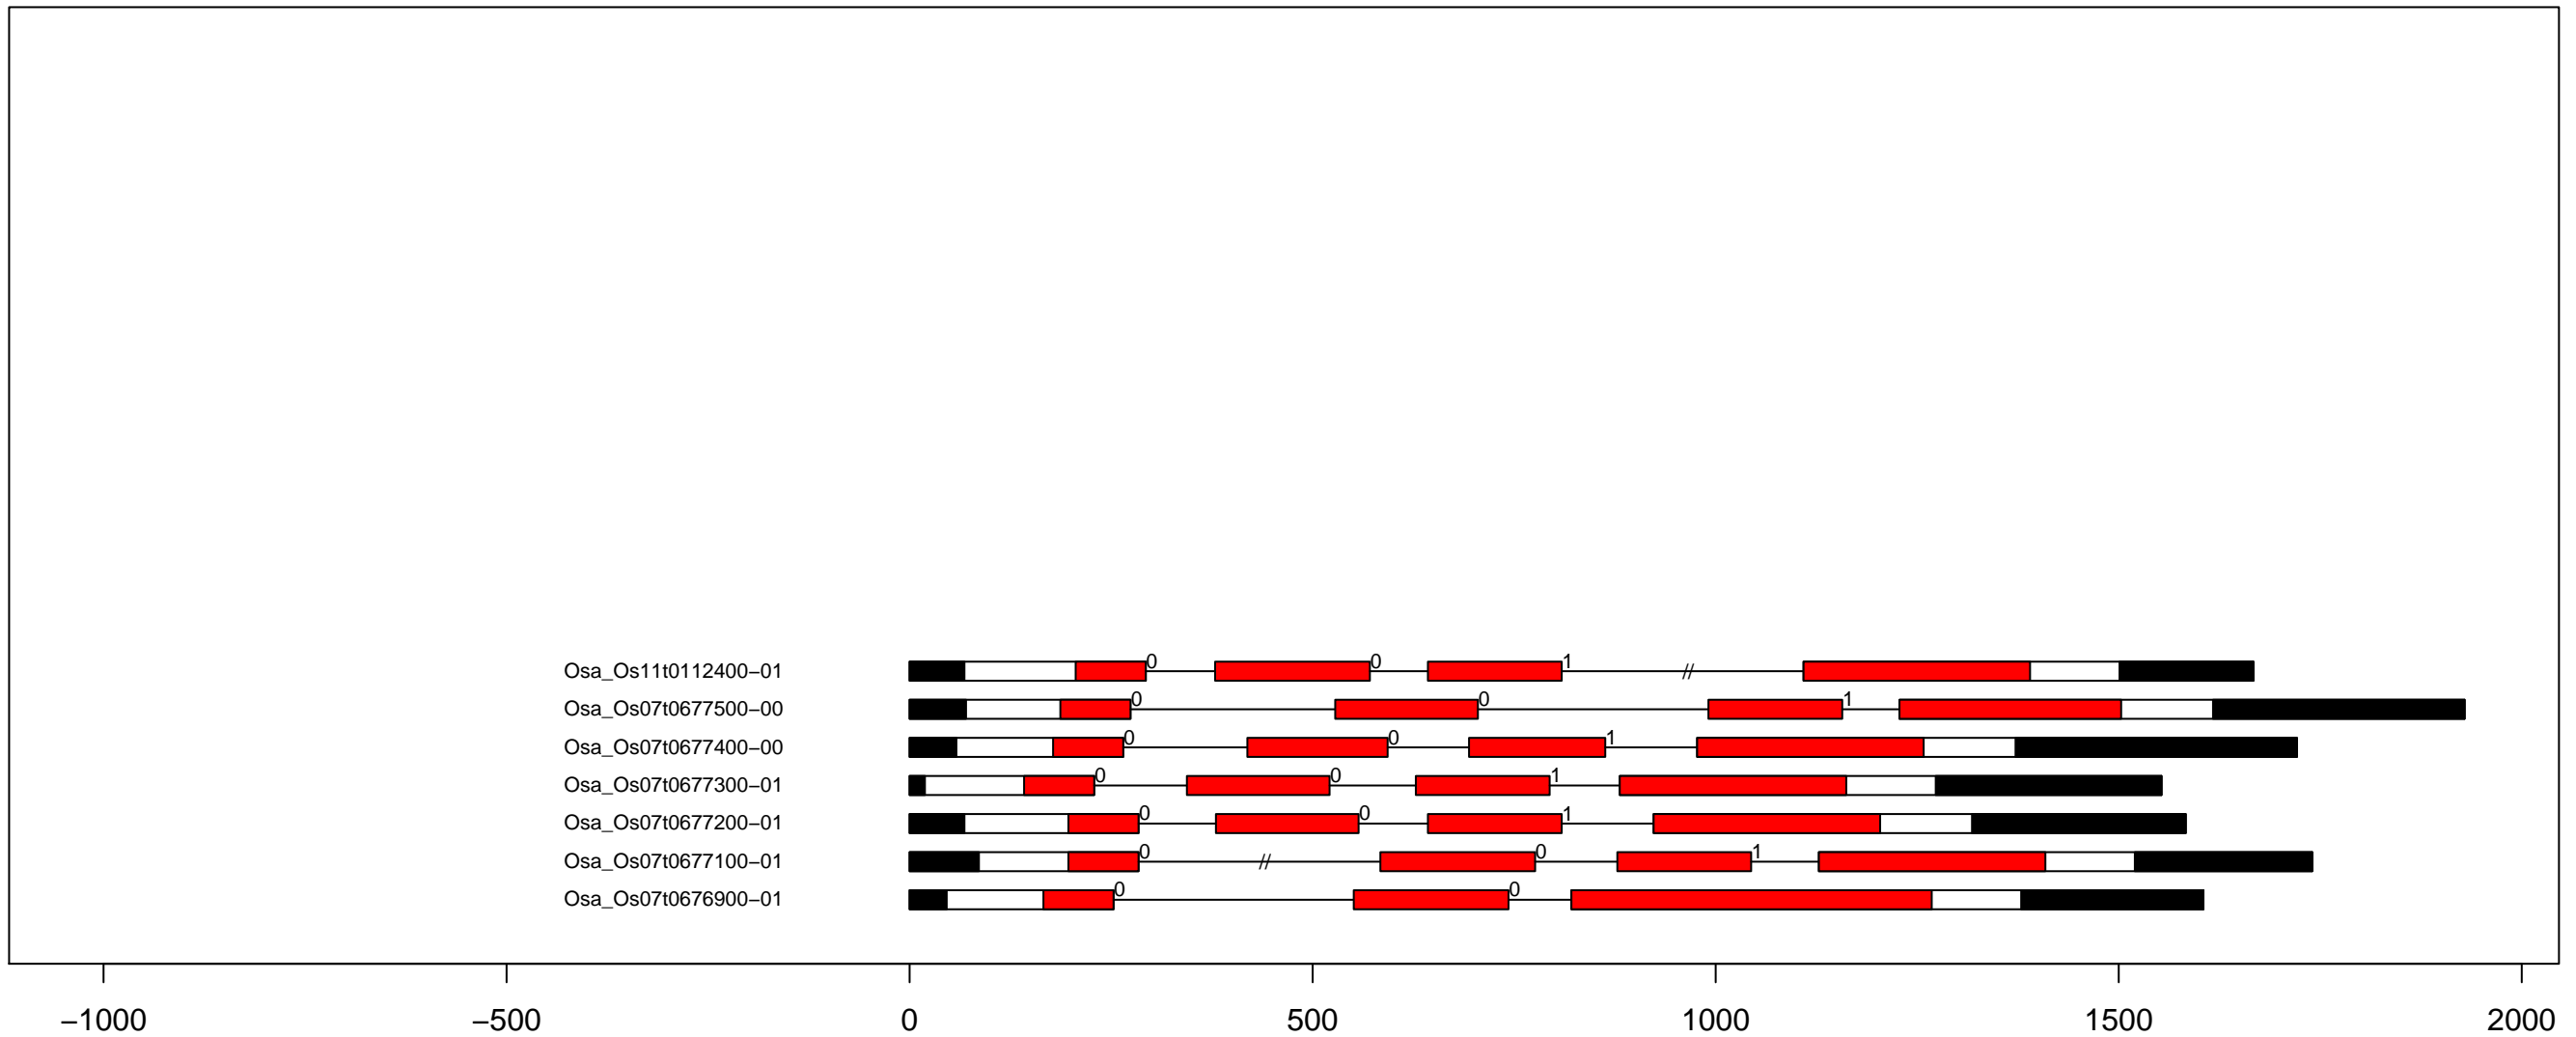

# O.sa class III peroxidase XVIII subfamily exon-intron and prx domain diagram (all)

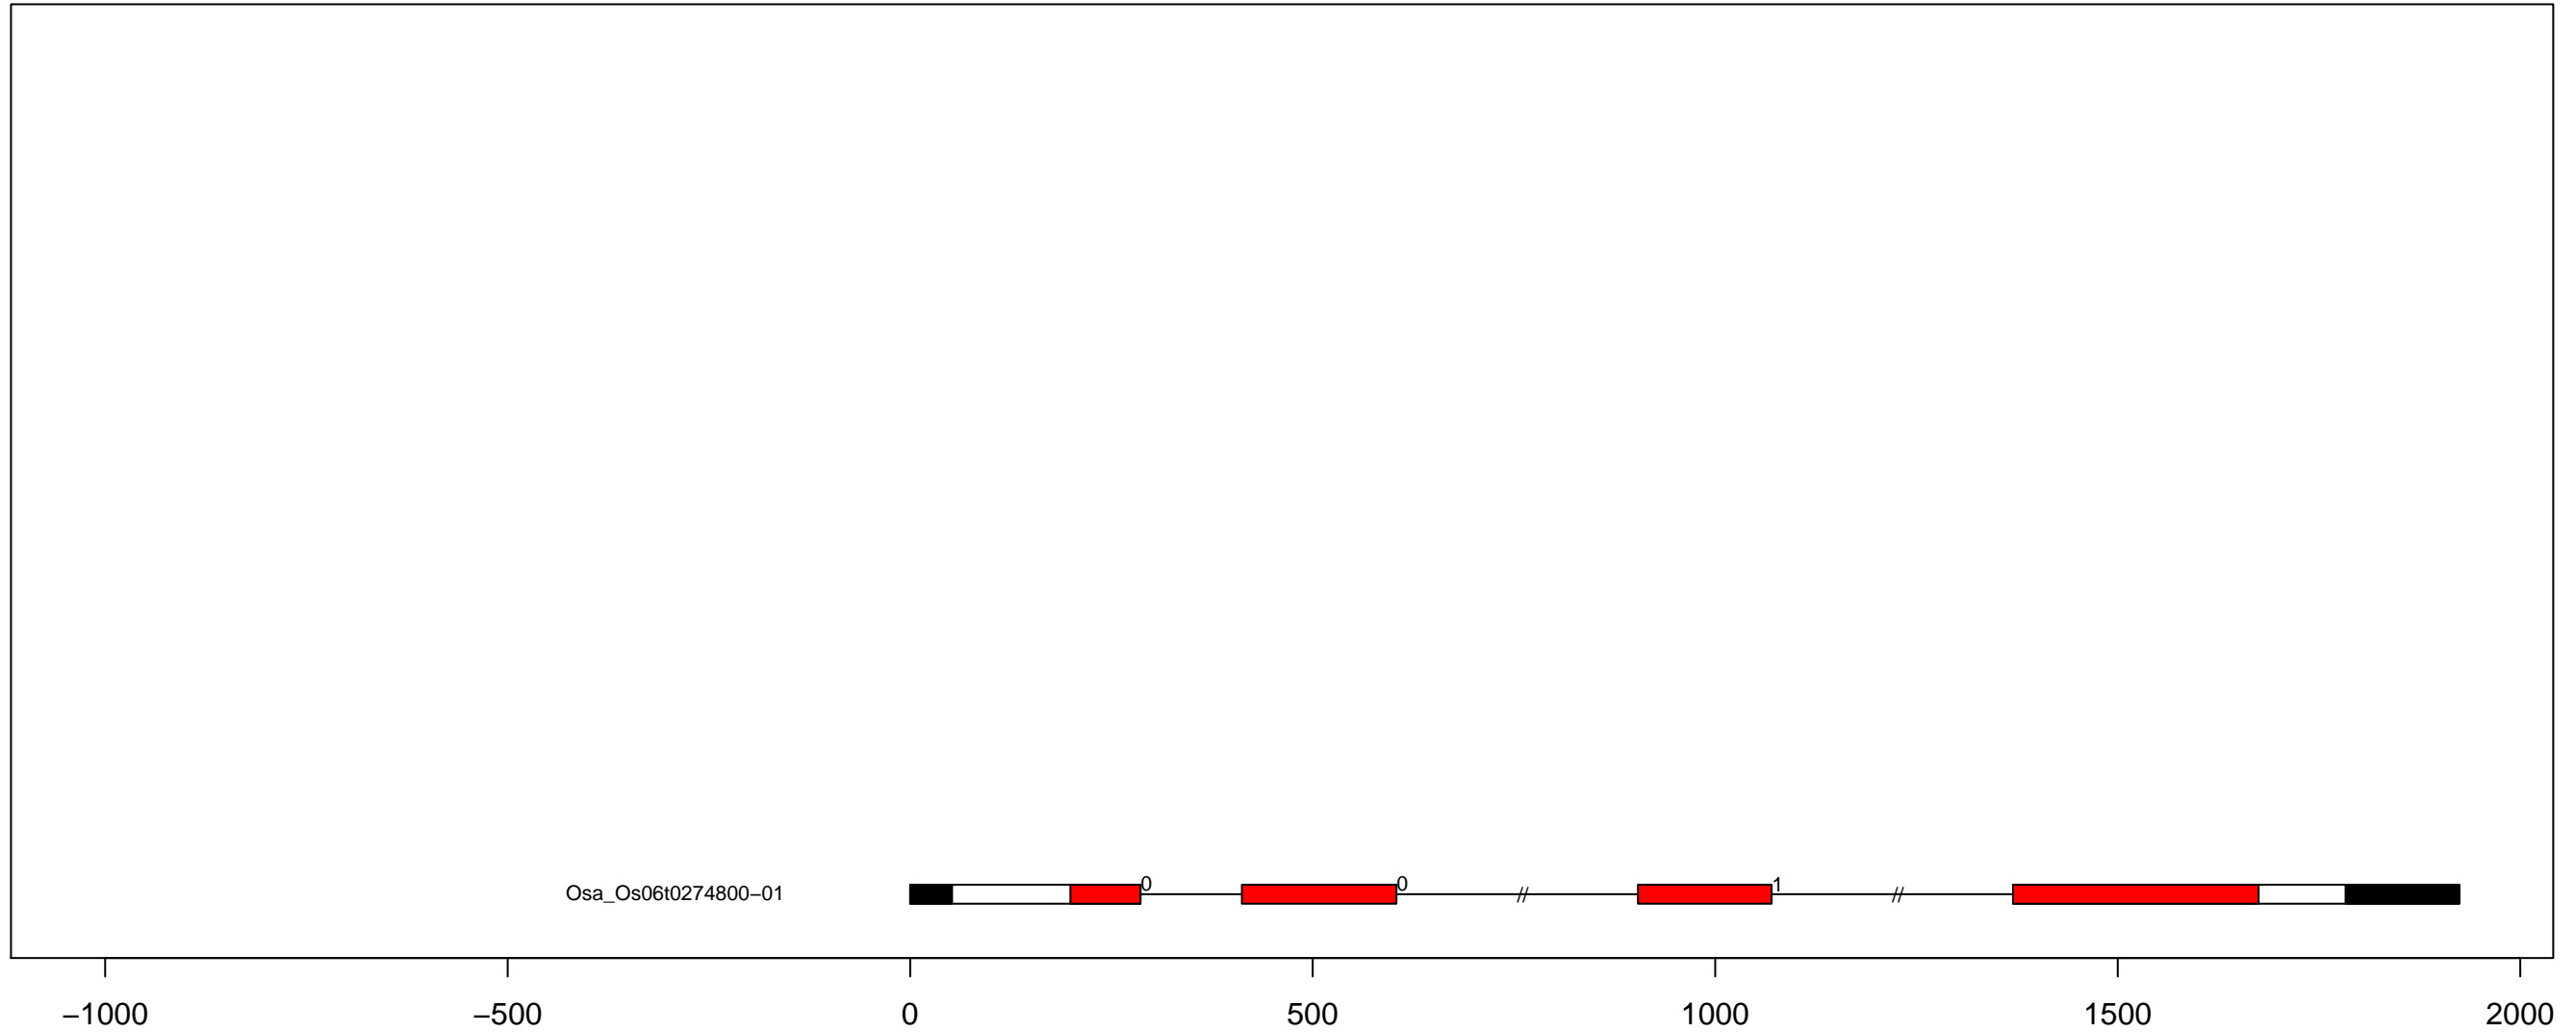

O.sa class III peroxidase unclar\_classifications subfamily exon-intron and prx domain diagram (all)

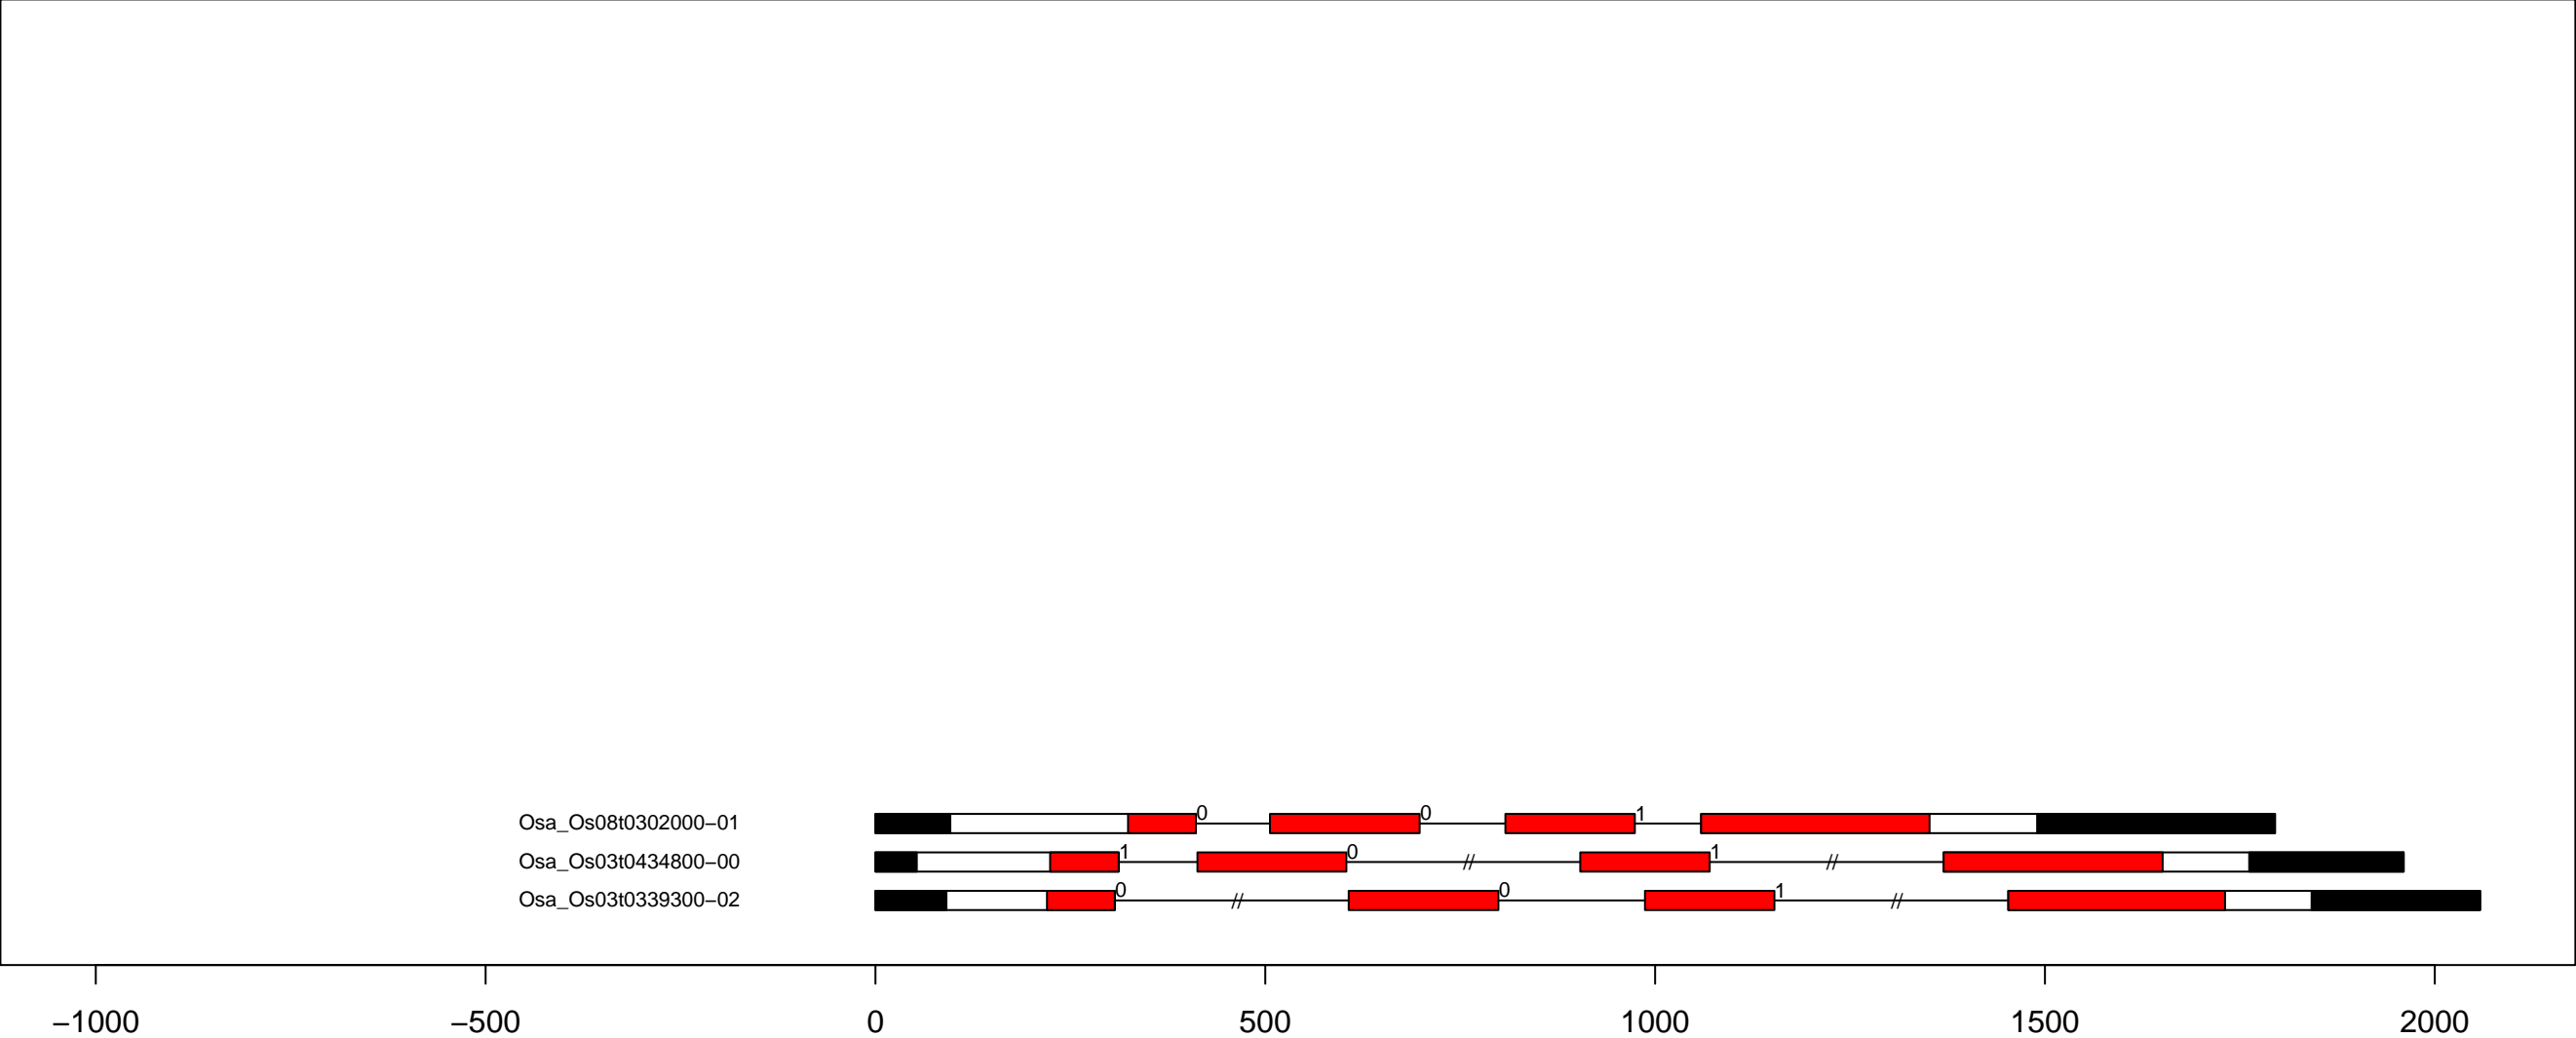



### Z.ma class III peroxidase I subfamily exon-intron and prx domain diagram (part 1)

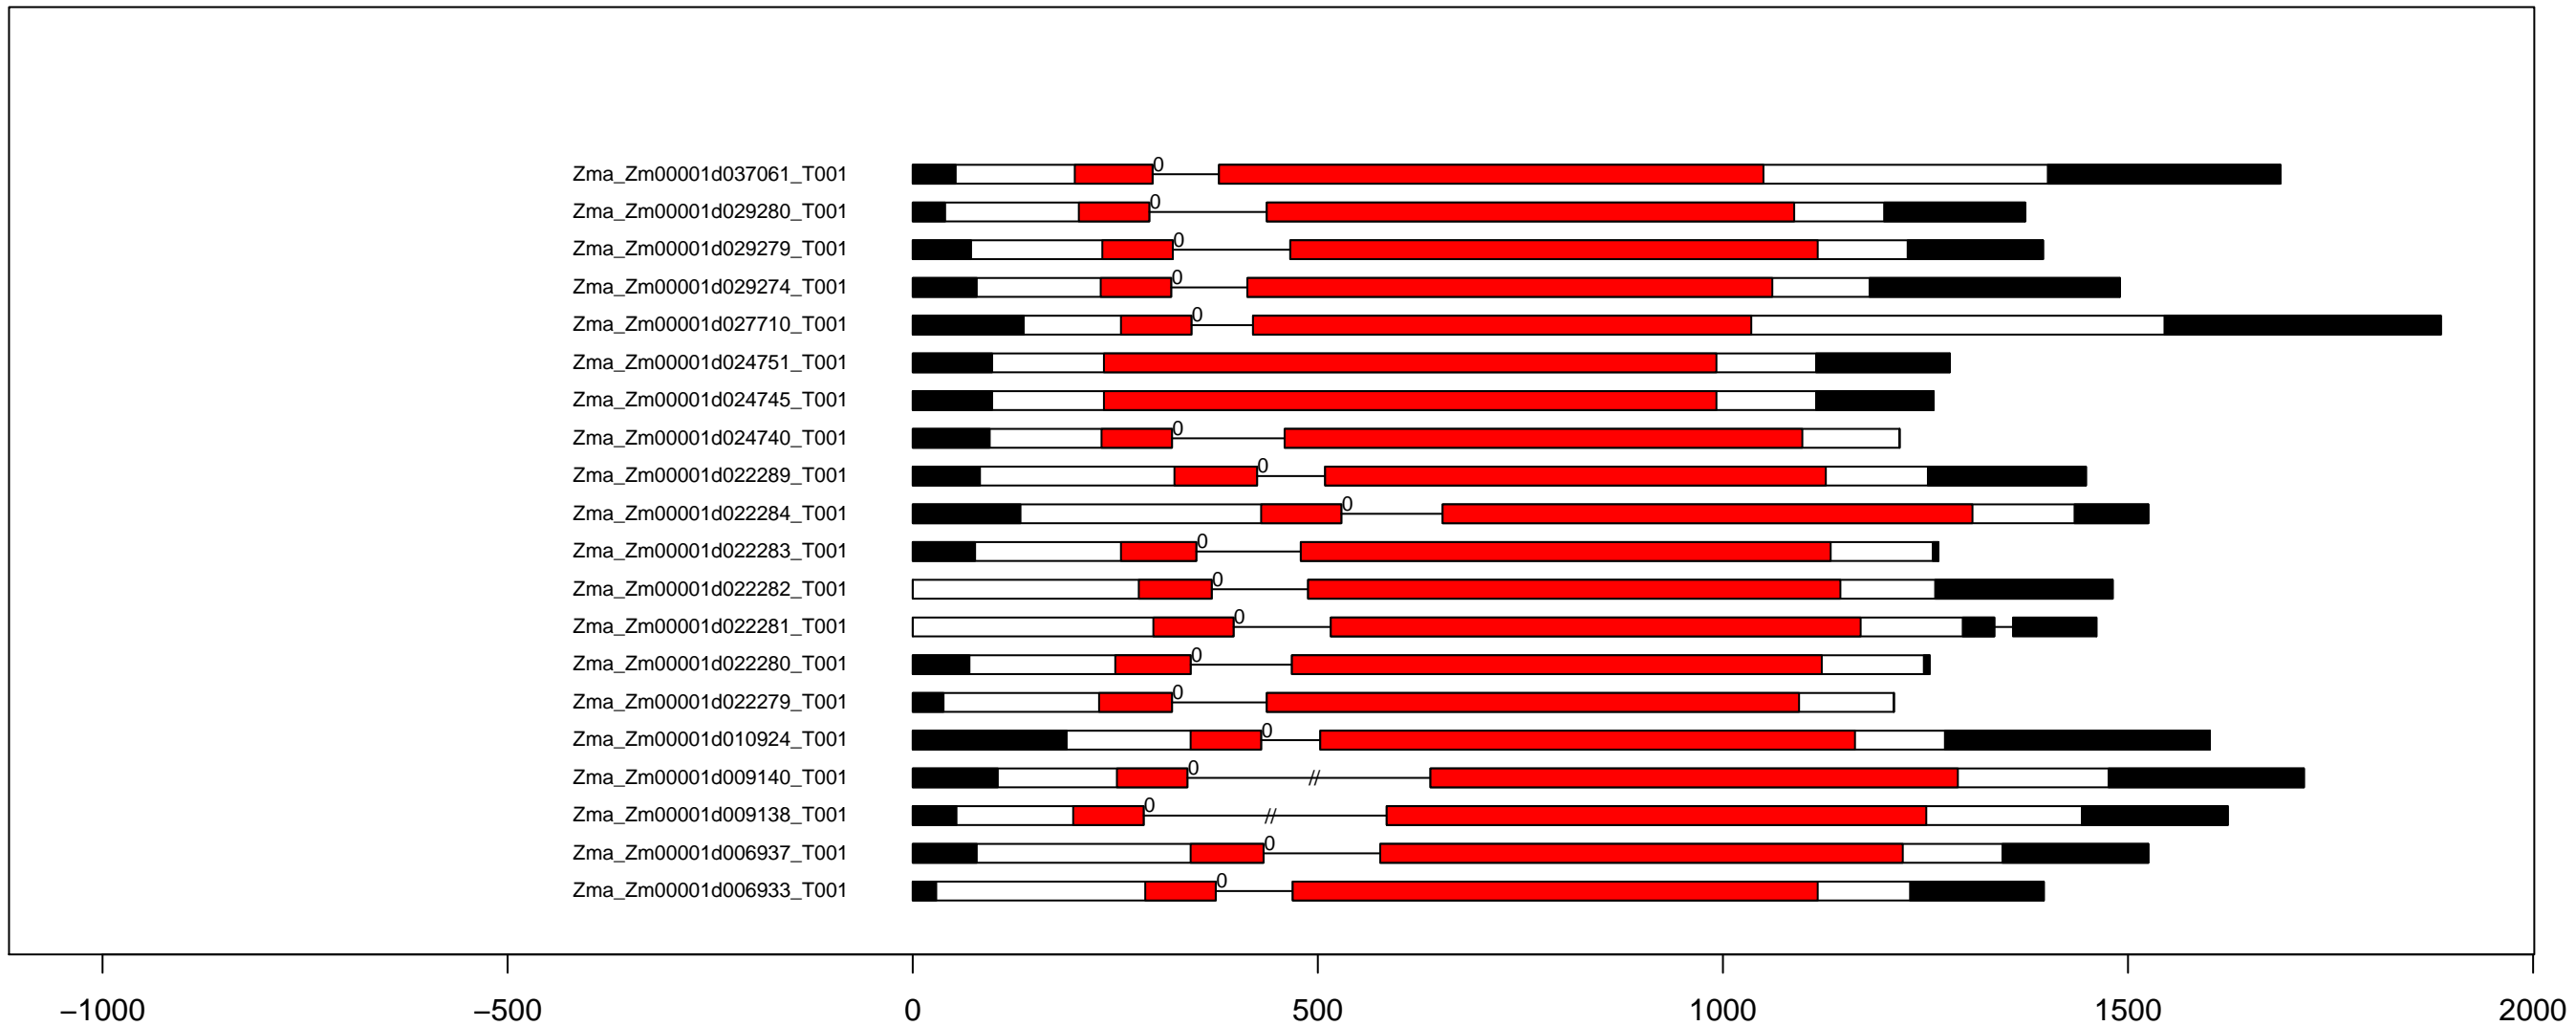

## Z.ma class III peroxidase I subfamily exon-intron and prx domain diagram (part 2)

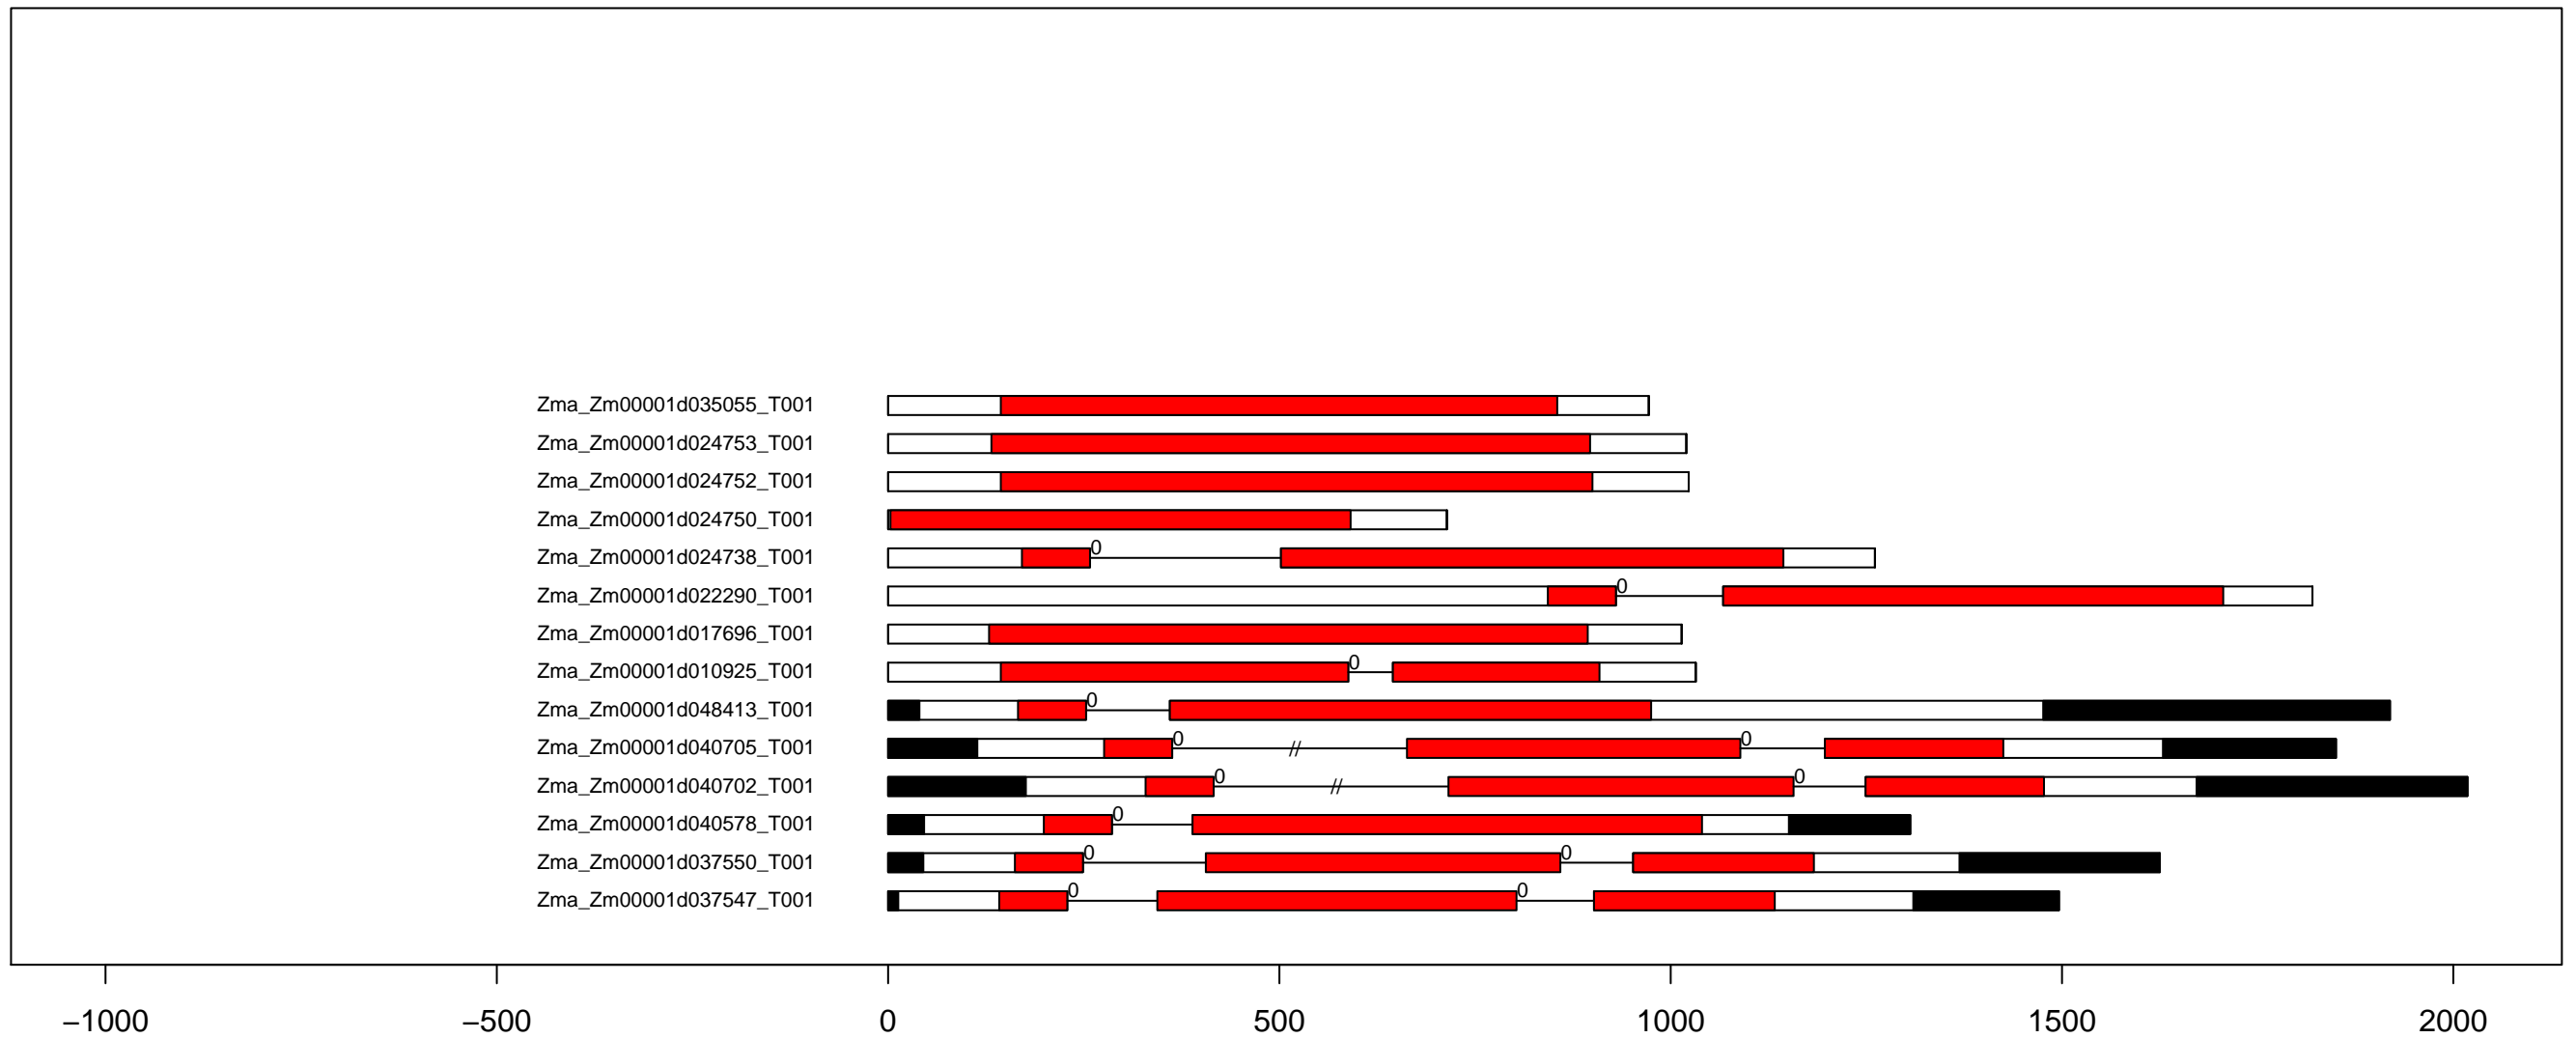

# Z.ma class III peroxidase II subfamily exon-intron and prx domain diagram (all)

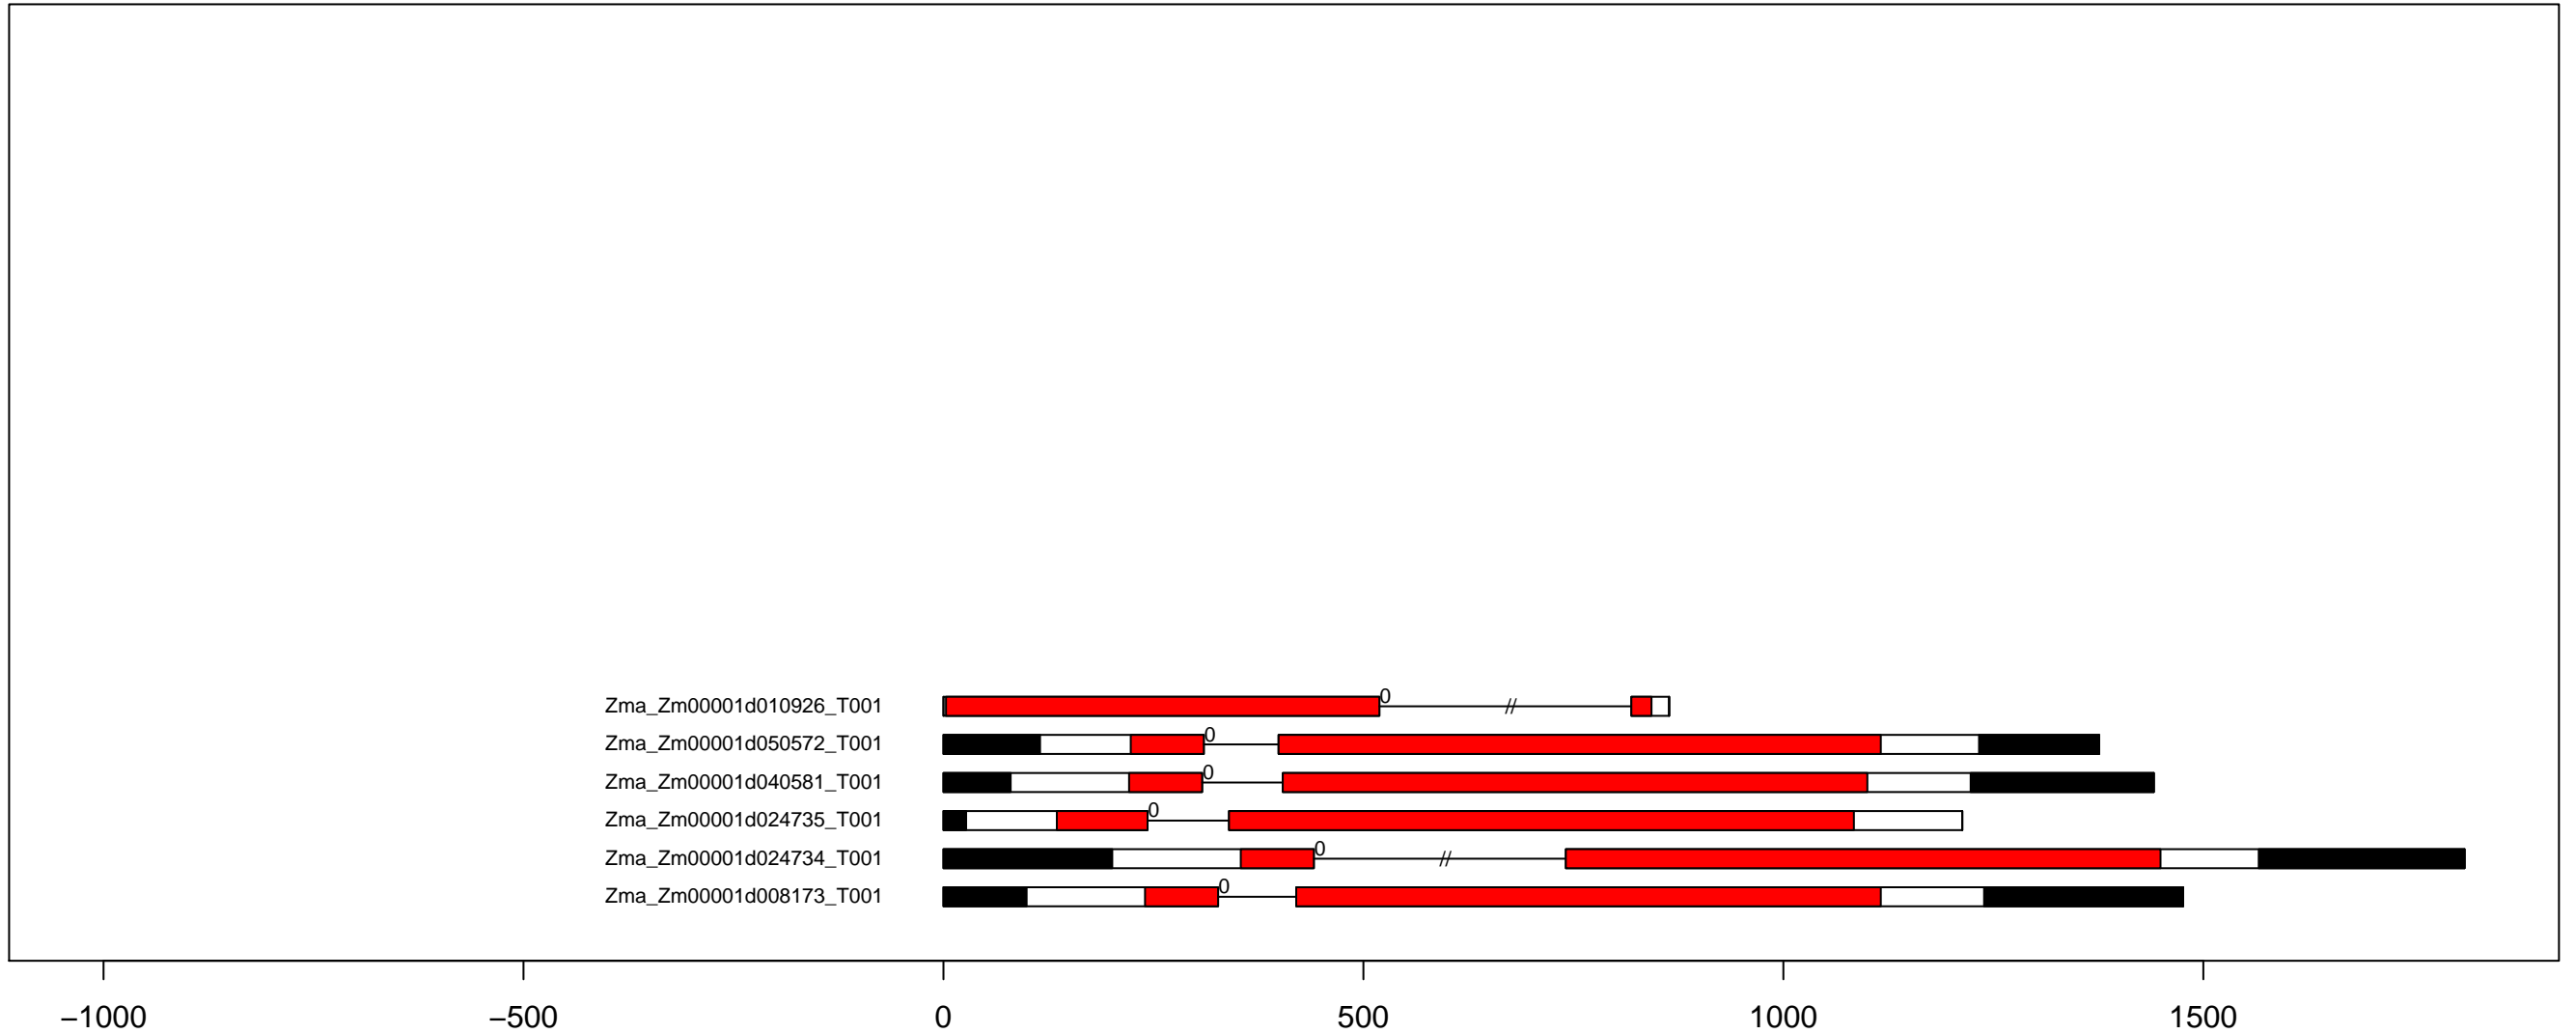

# Z.ma class III peroxidase III subfamily exon-intron and prx domain diagram (all)

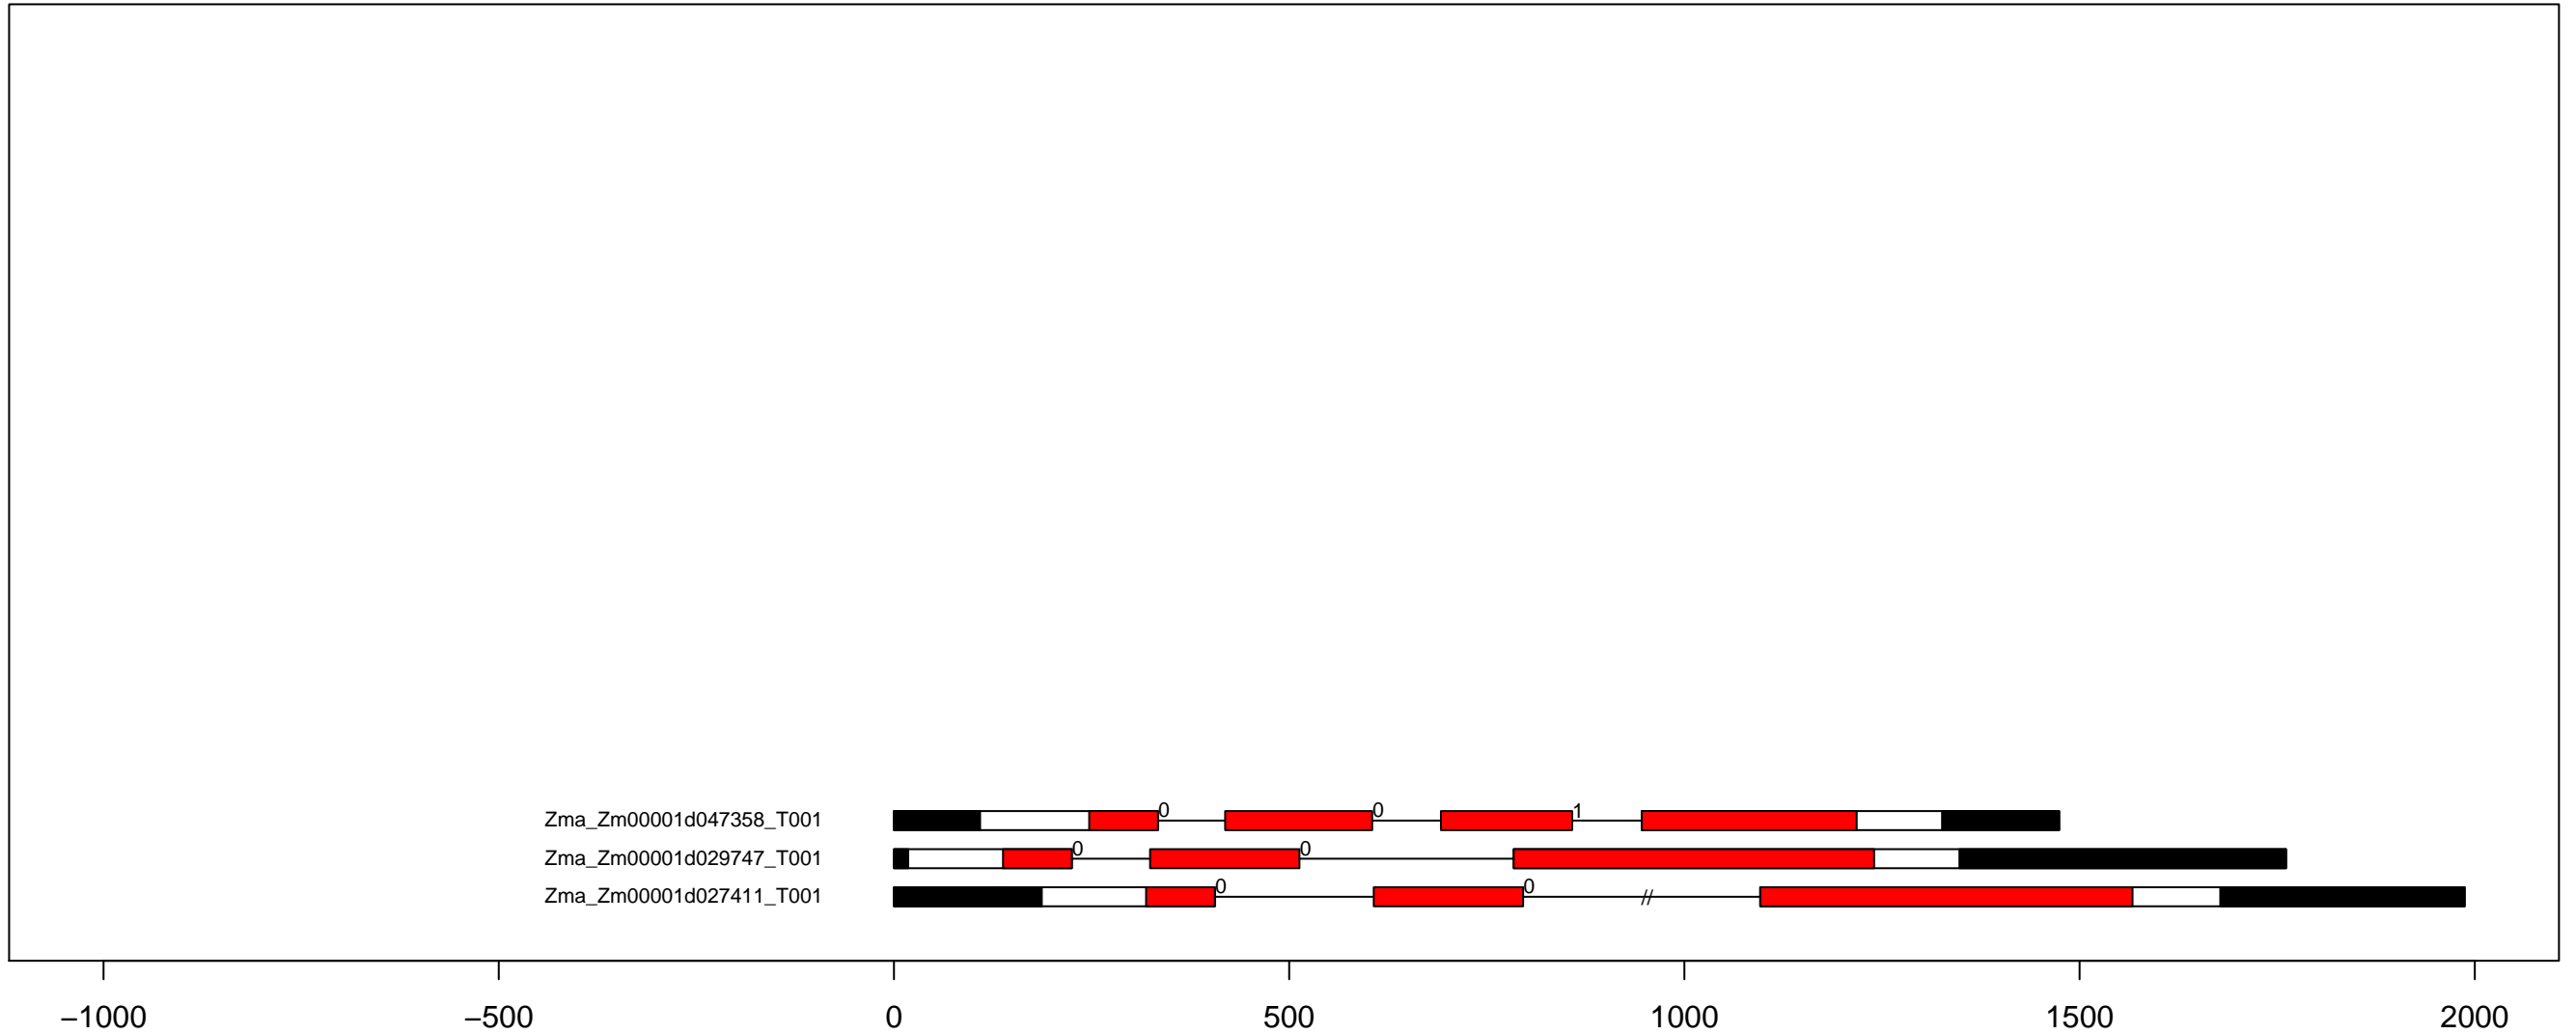

### Z.ma class III peroxidase V subfamily exon-intron and prx domain diagram (all)

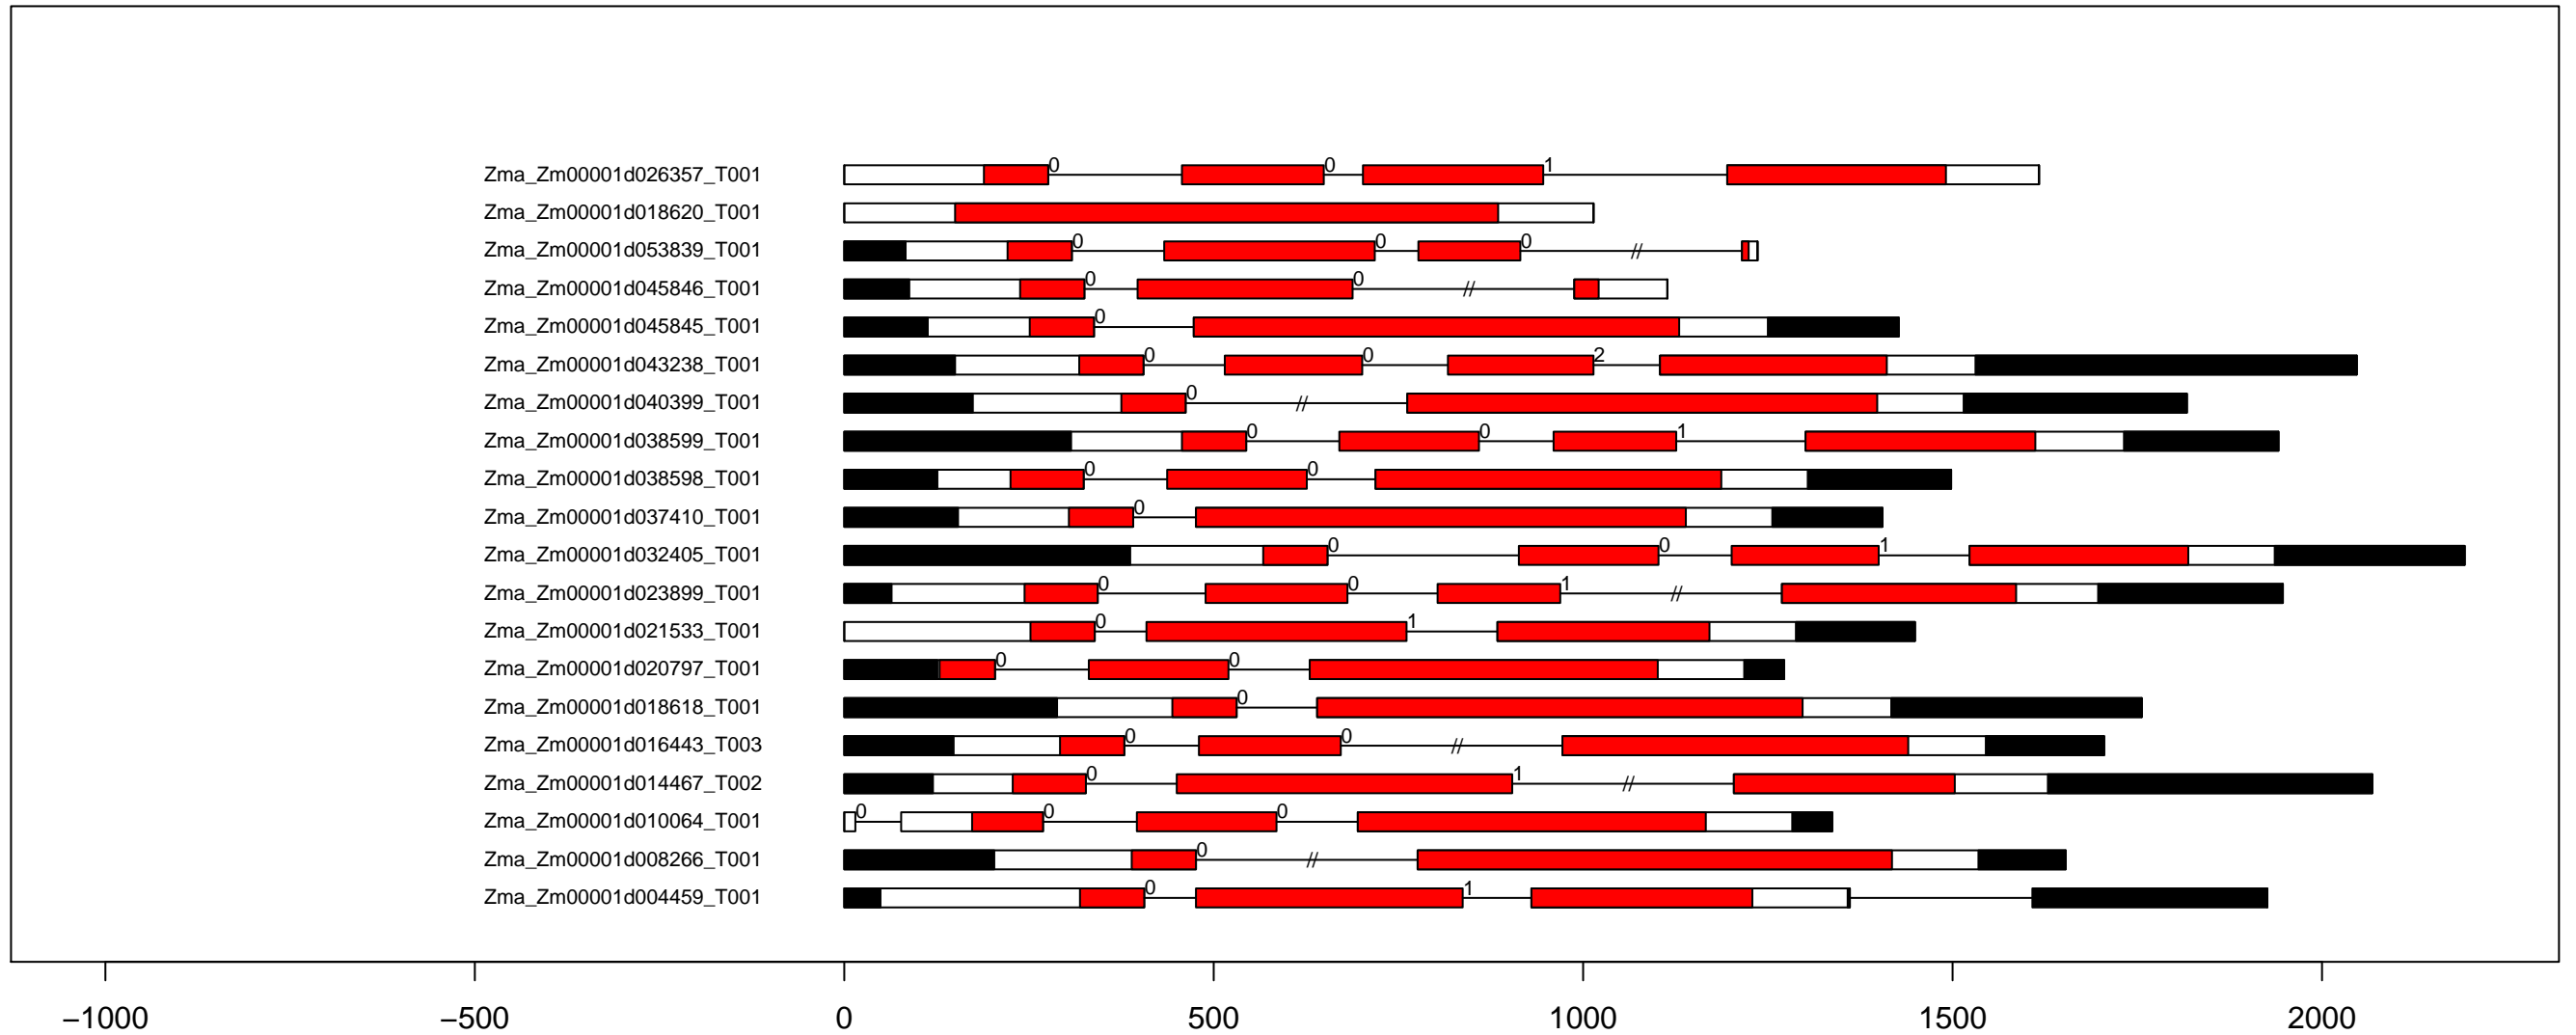

# Z.ma class III peroxidase VI subfamily exon-intron and prx domain diagram (all)

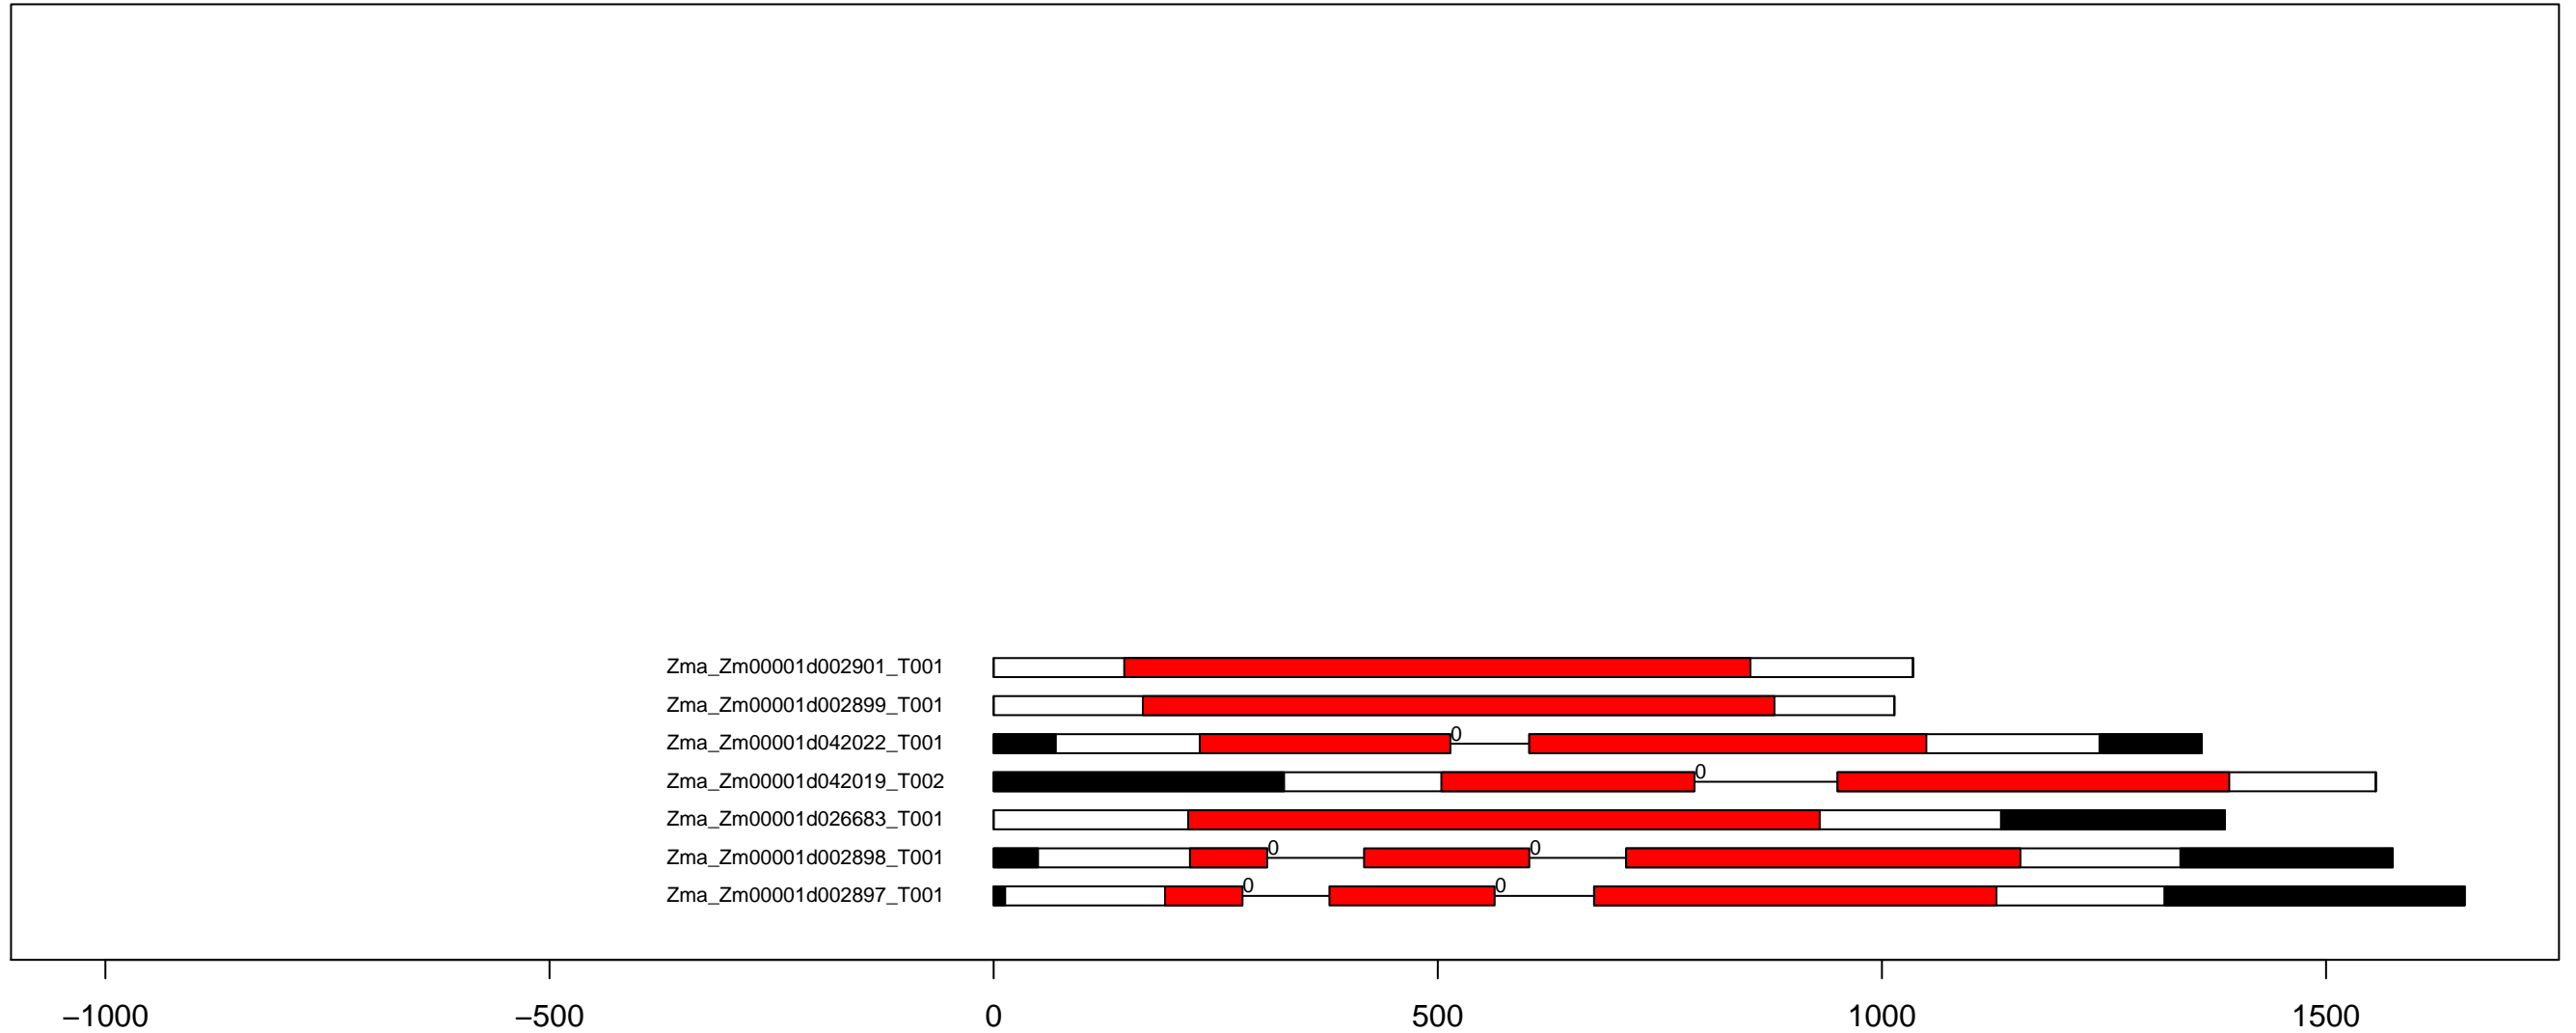

### Z.ma class III peroxidase VII subfamily exon-intron and prx domain diagram (all)

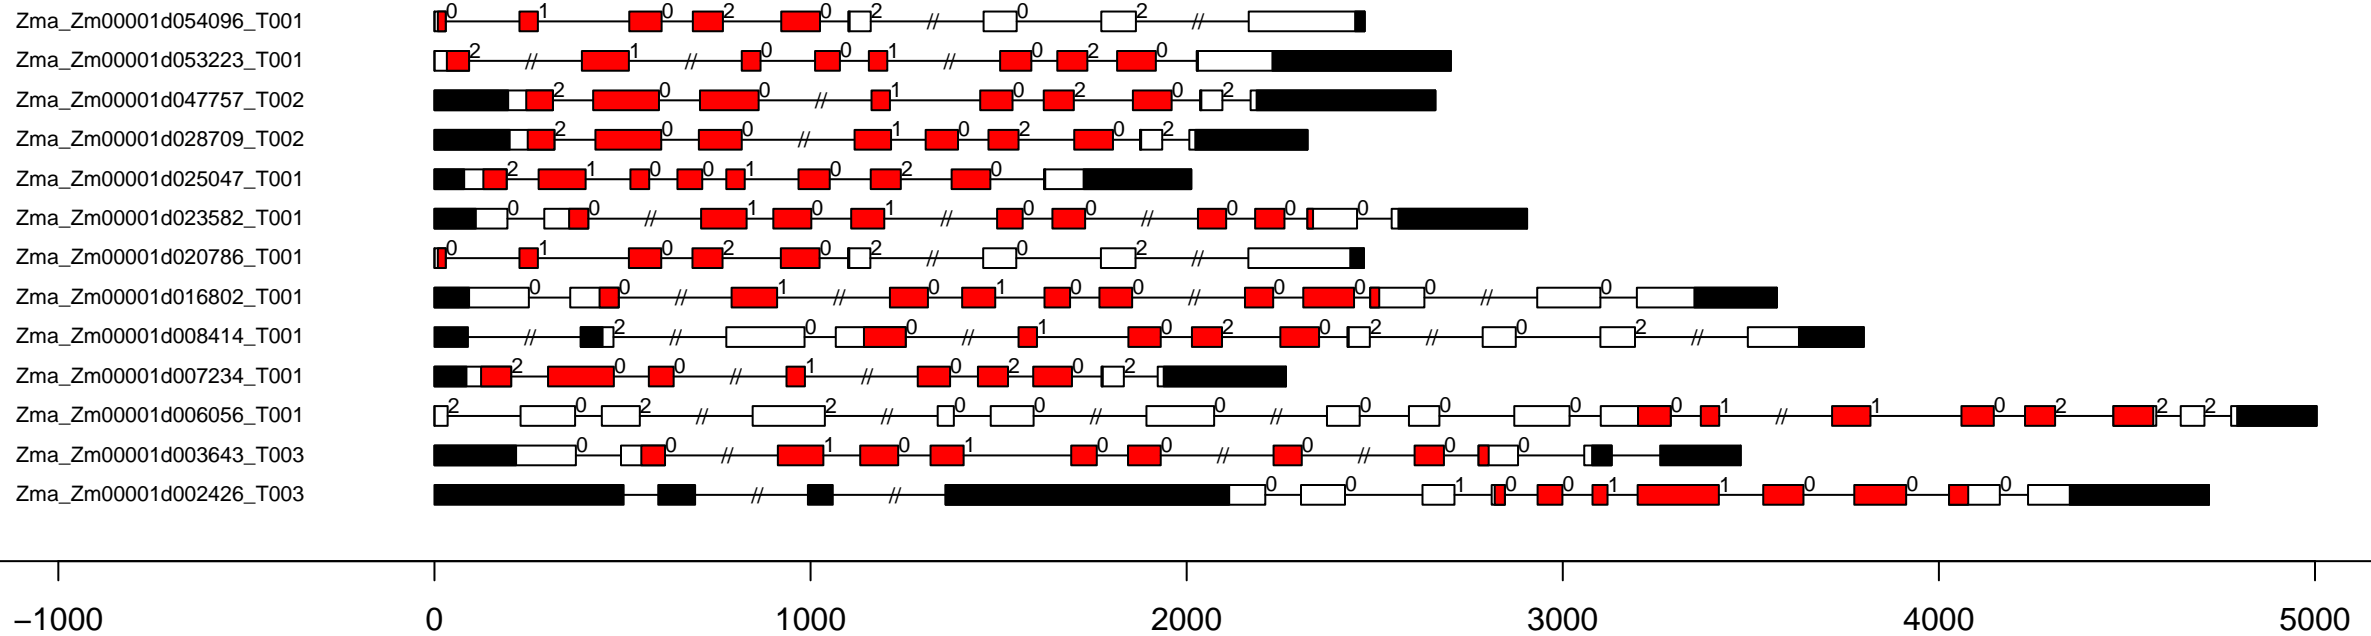

### Z.ma class III peroxidase IX subfamily exon-intron and prx domain diagram (all)

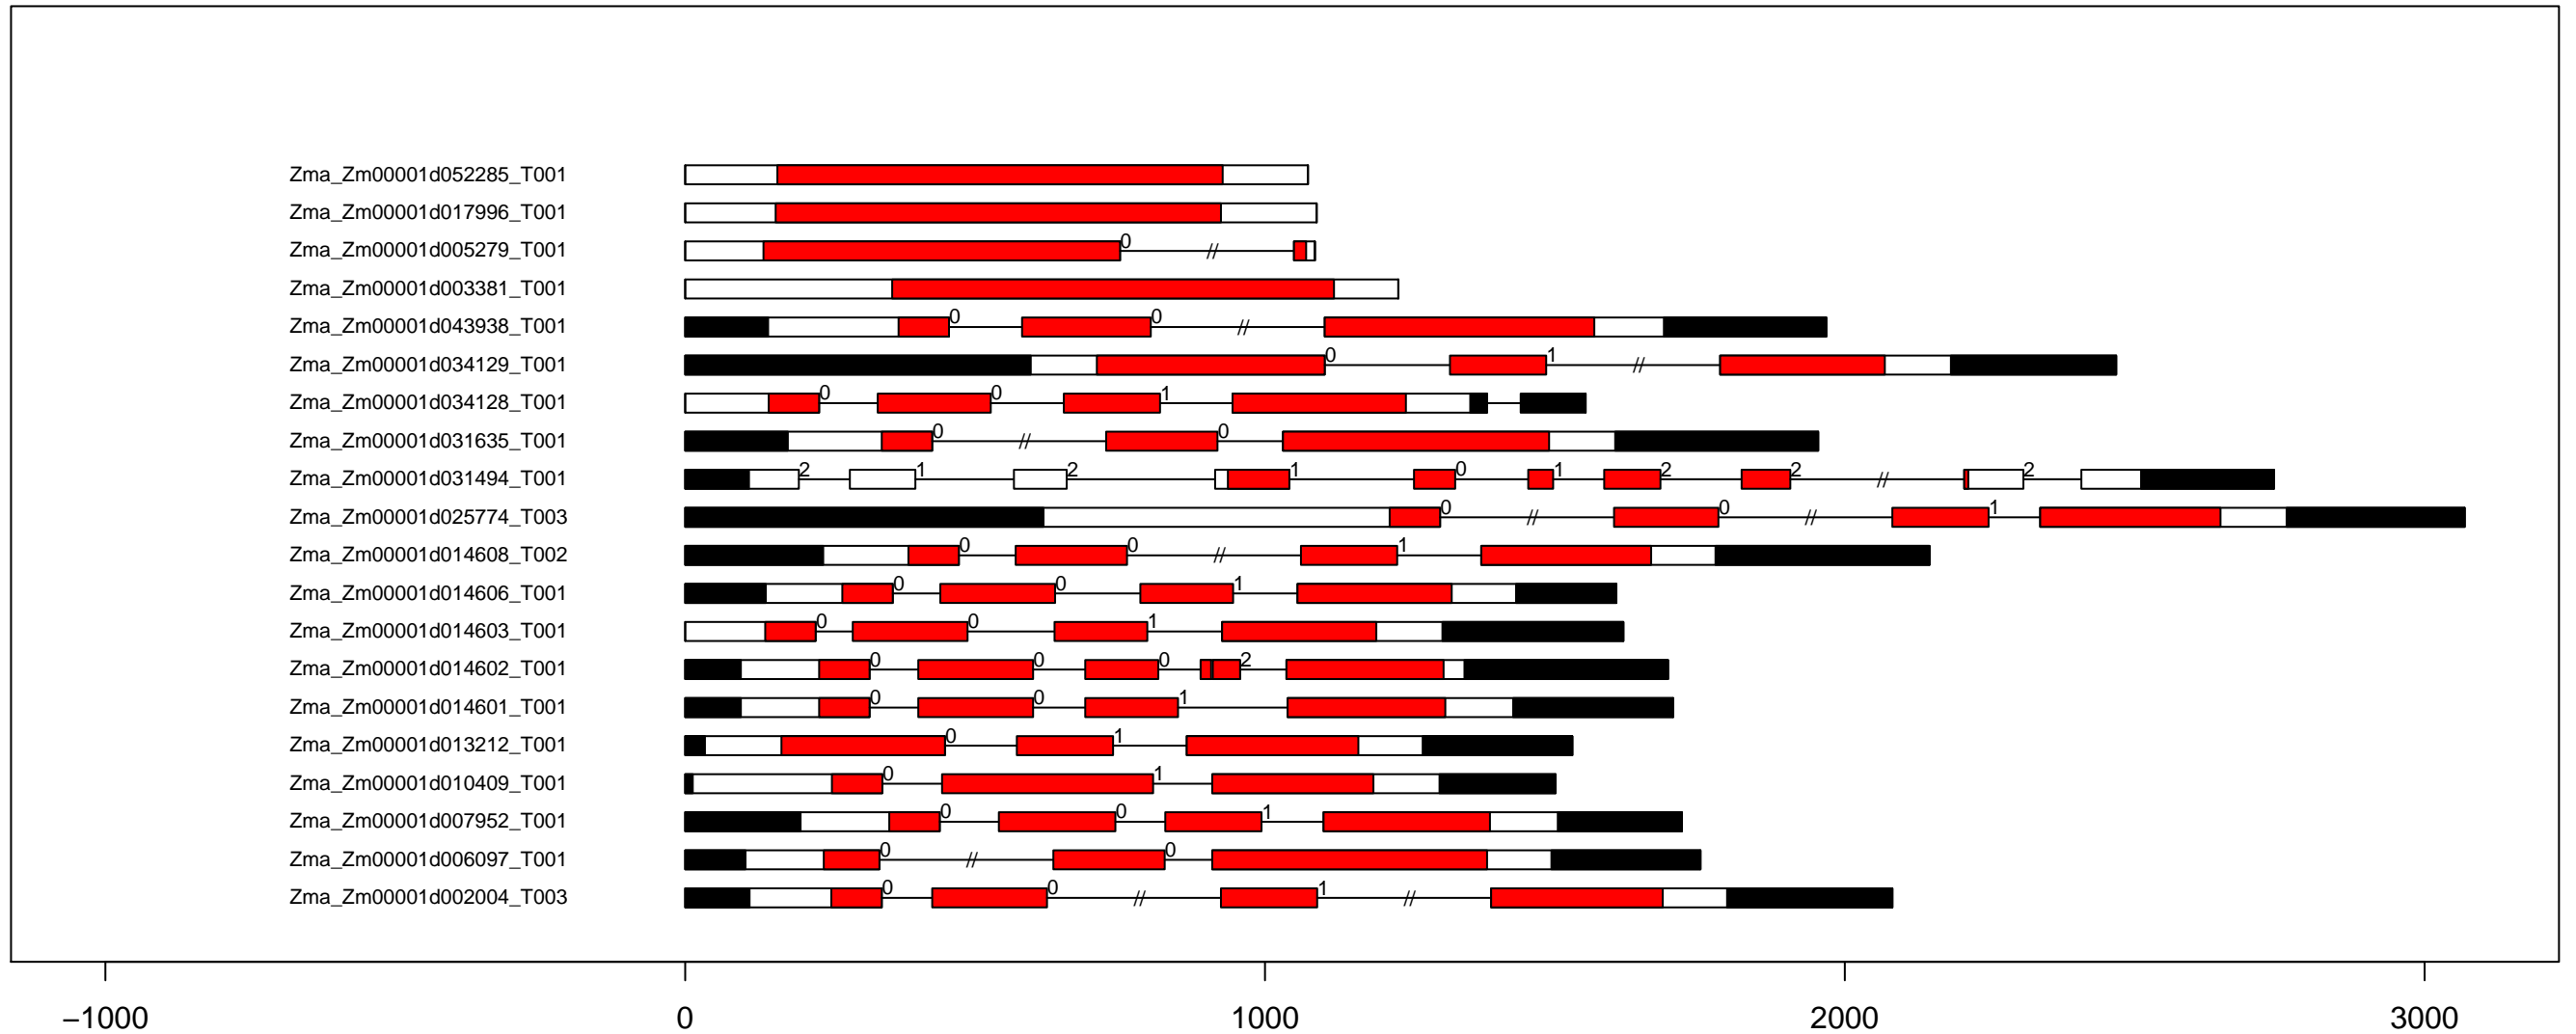



# Z.ma class III peroxidase X subfamily exon-intron and prx domain diagram (all)

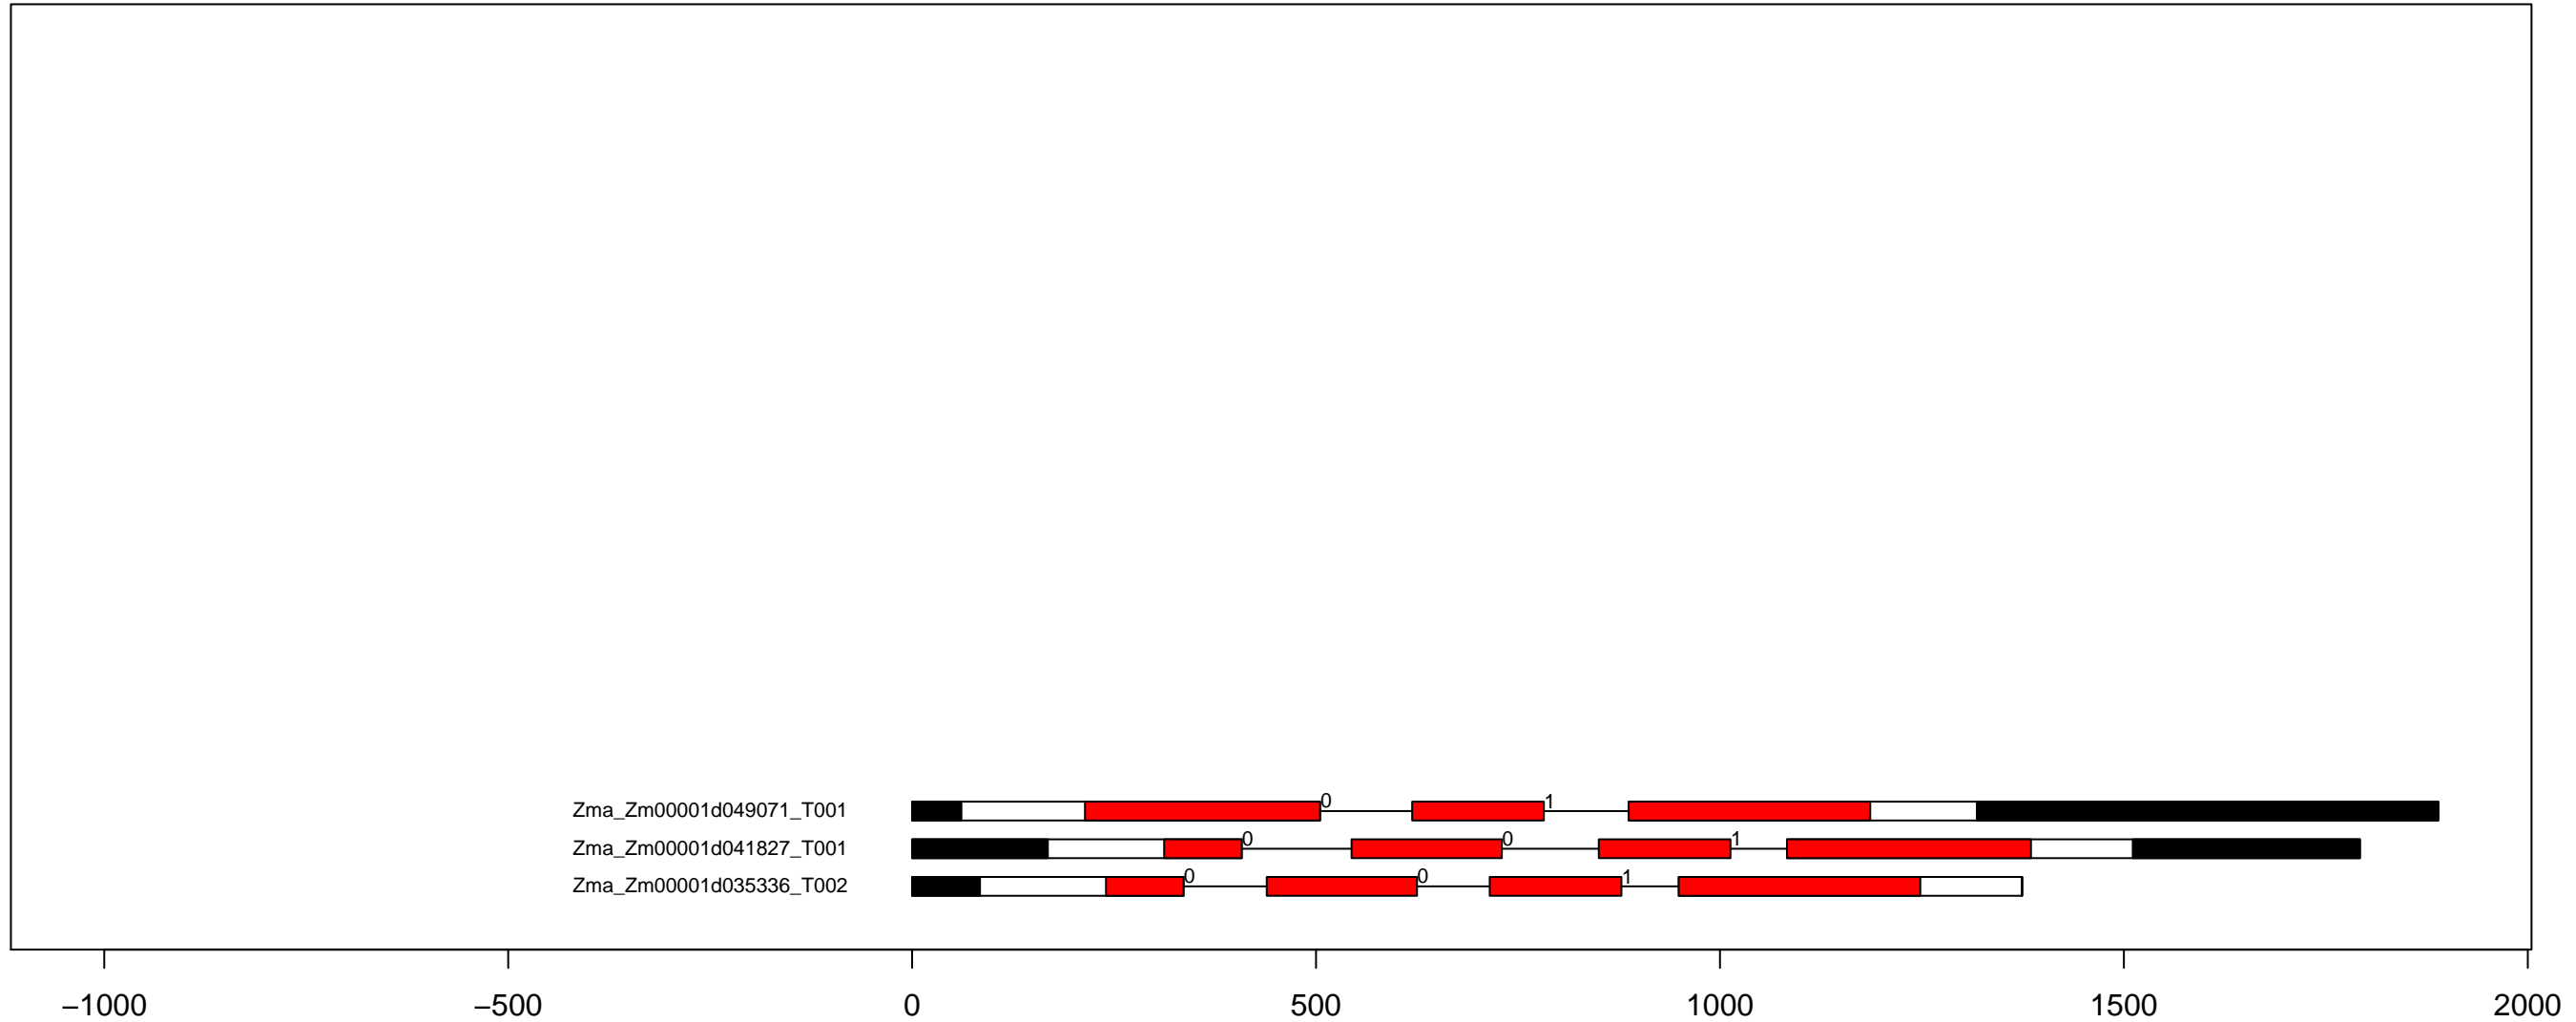

# Z.ma class III peroxidase XI subfamily exon-intron and prx domain diagram (all)

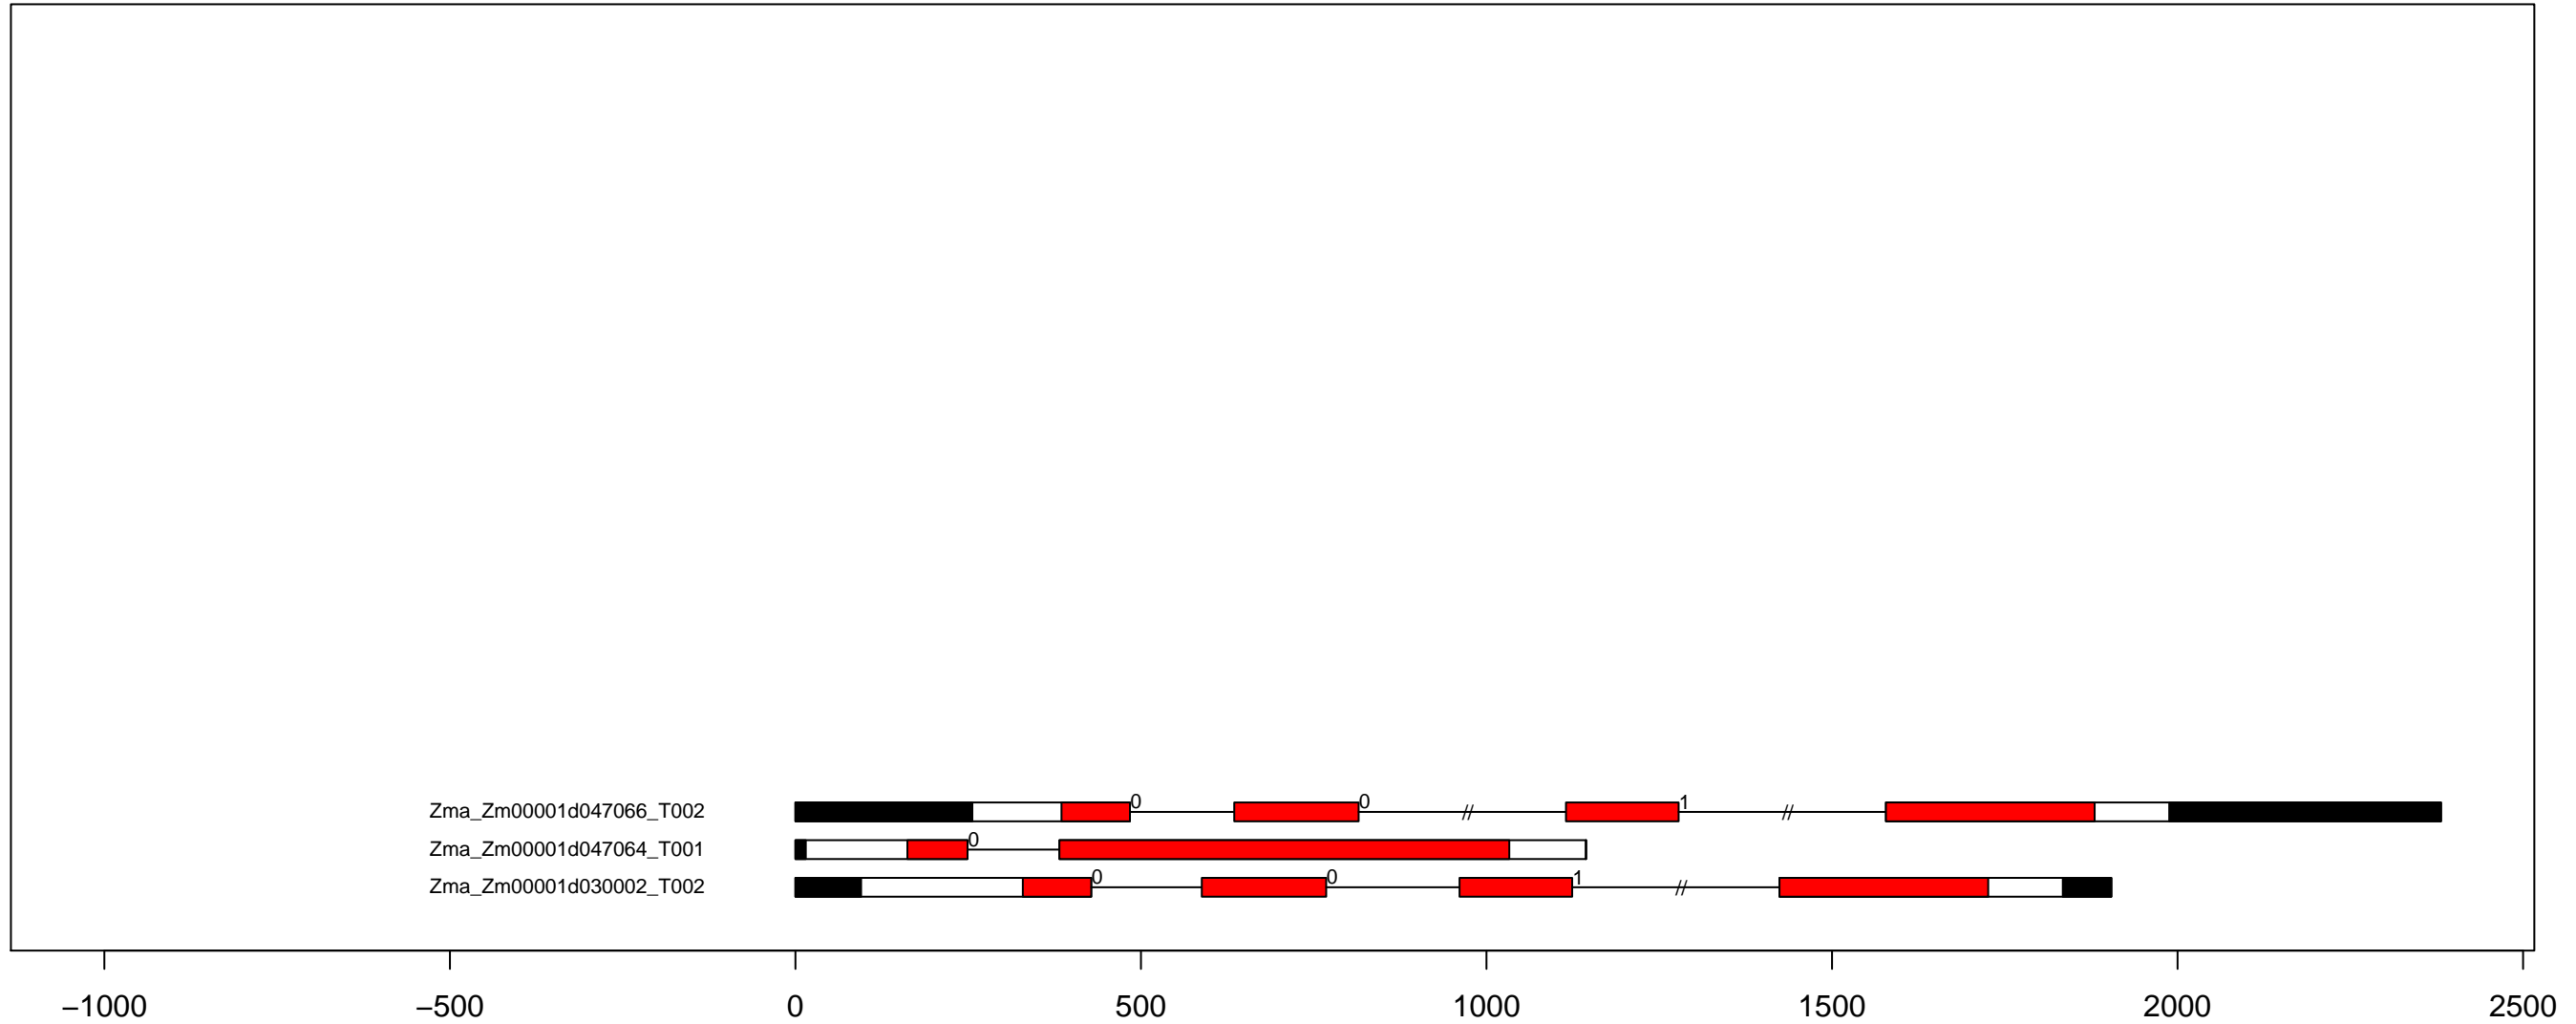

# Z.ma class III peroxidase XII subfamily exon-intron and prx domain diagram (all)

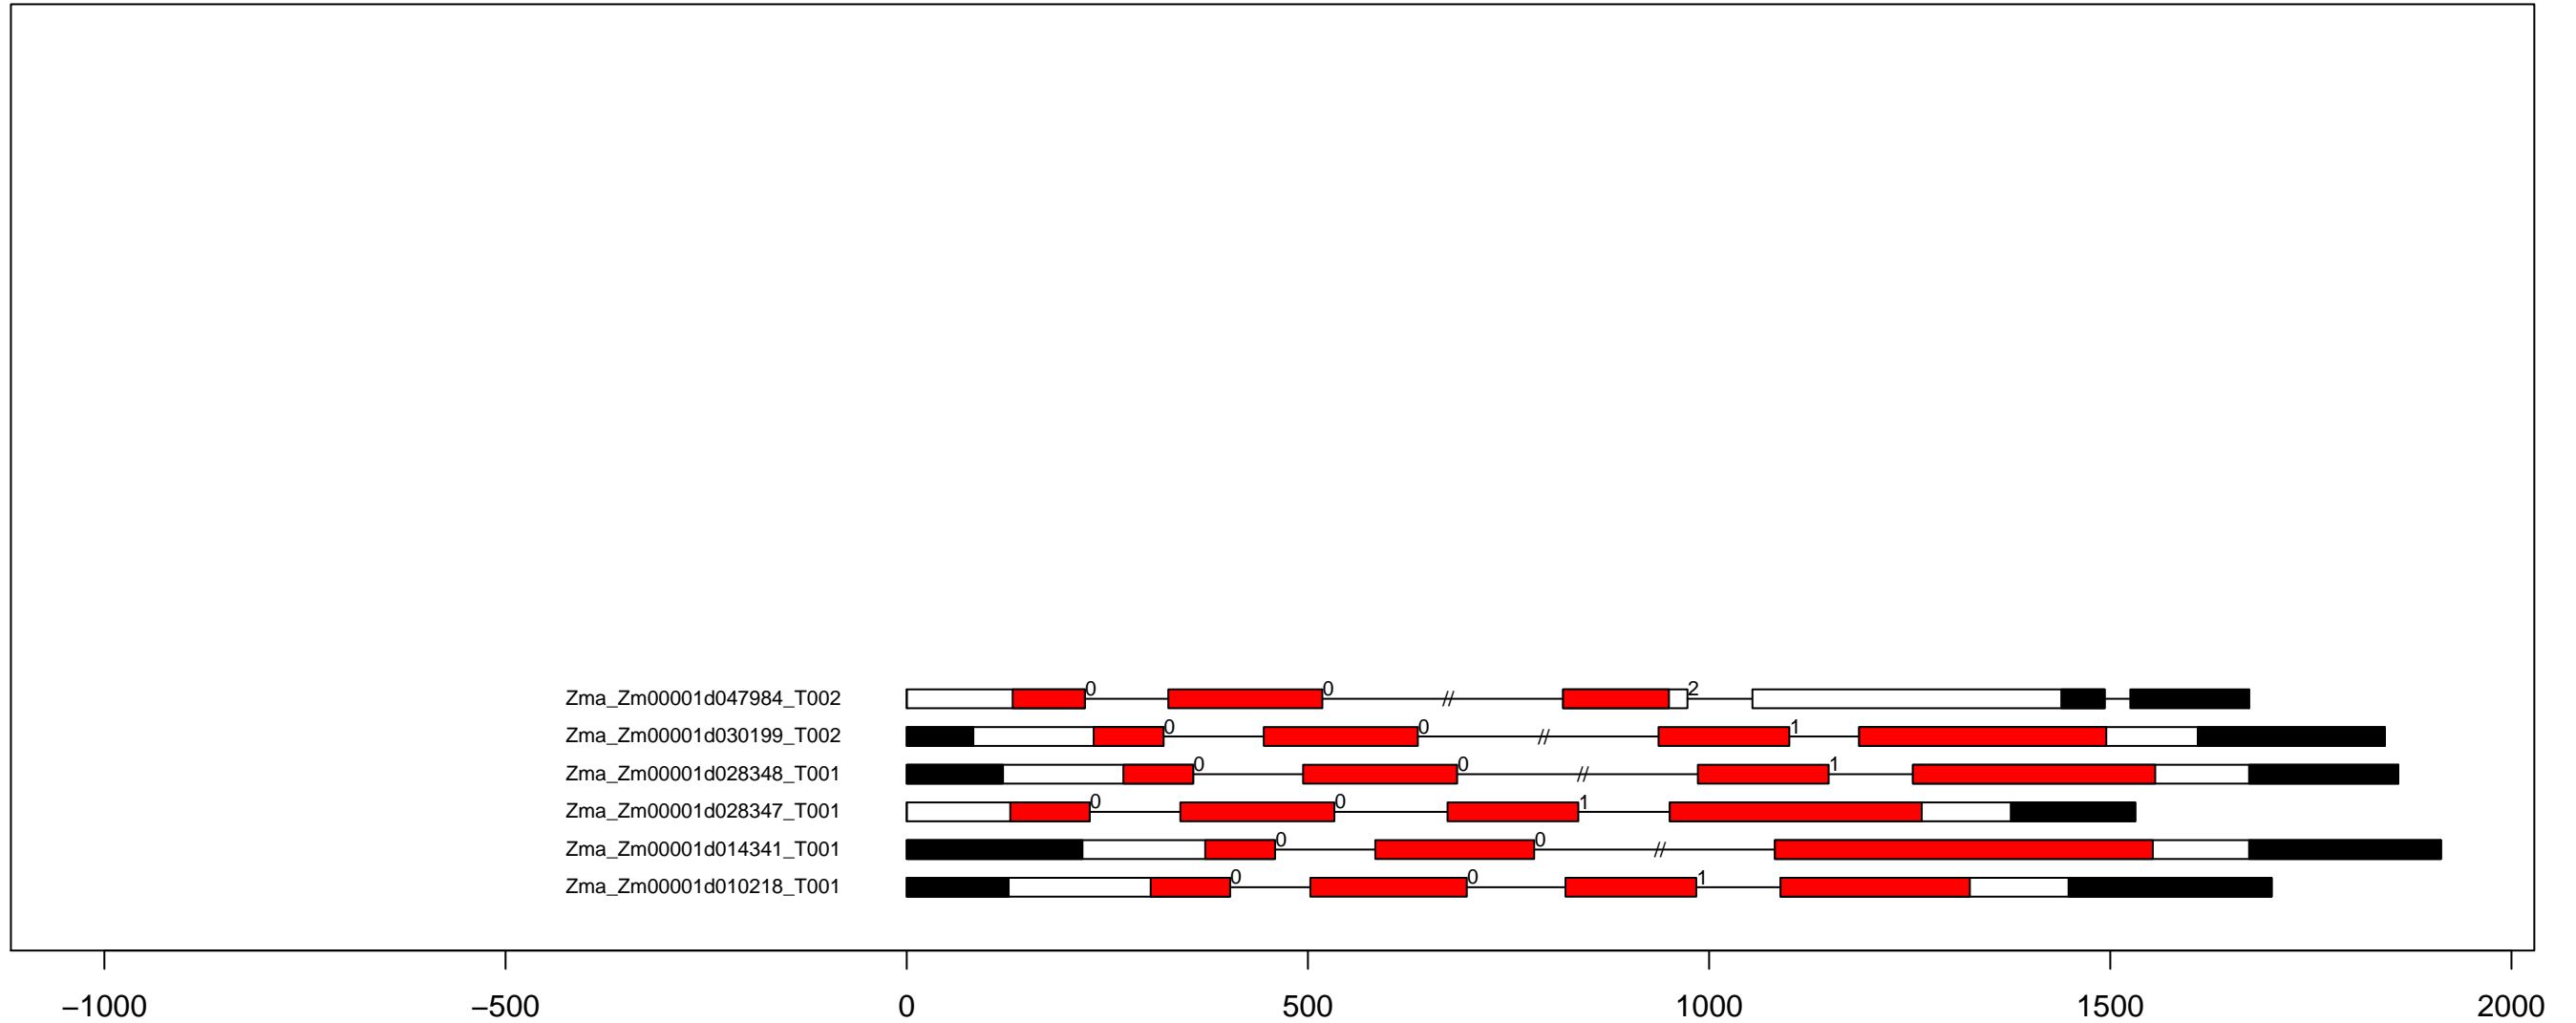

### Z.ma class III peroxidase XIII subfamily exon-intron and prx domain diagram (all)

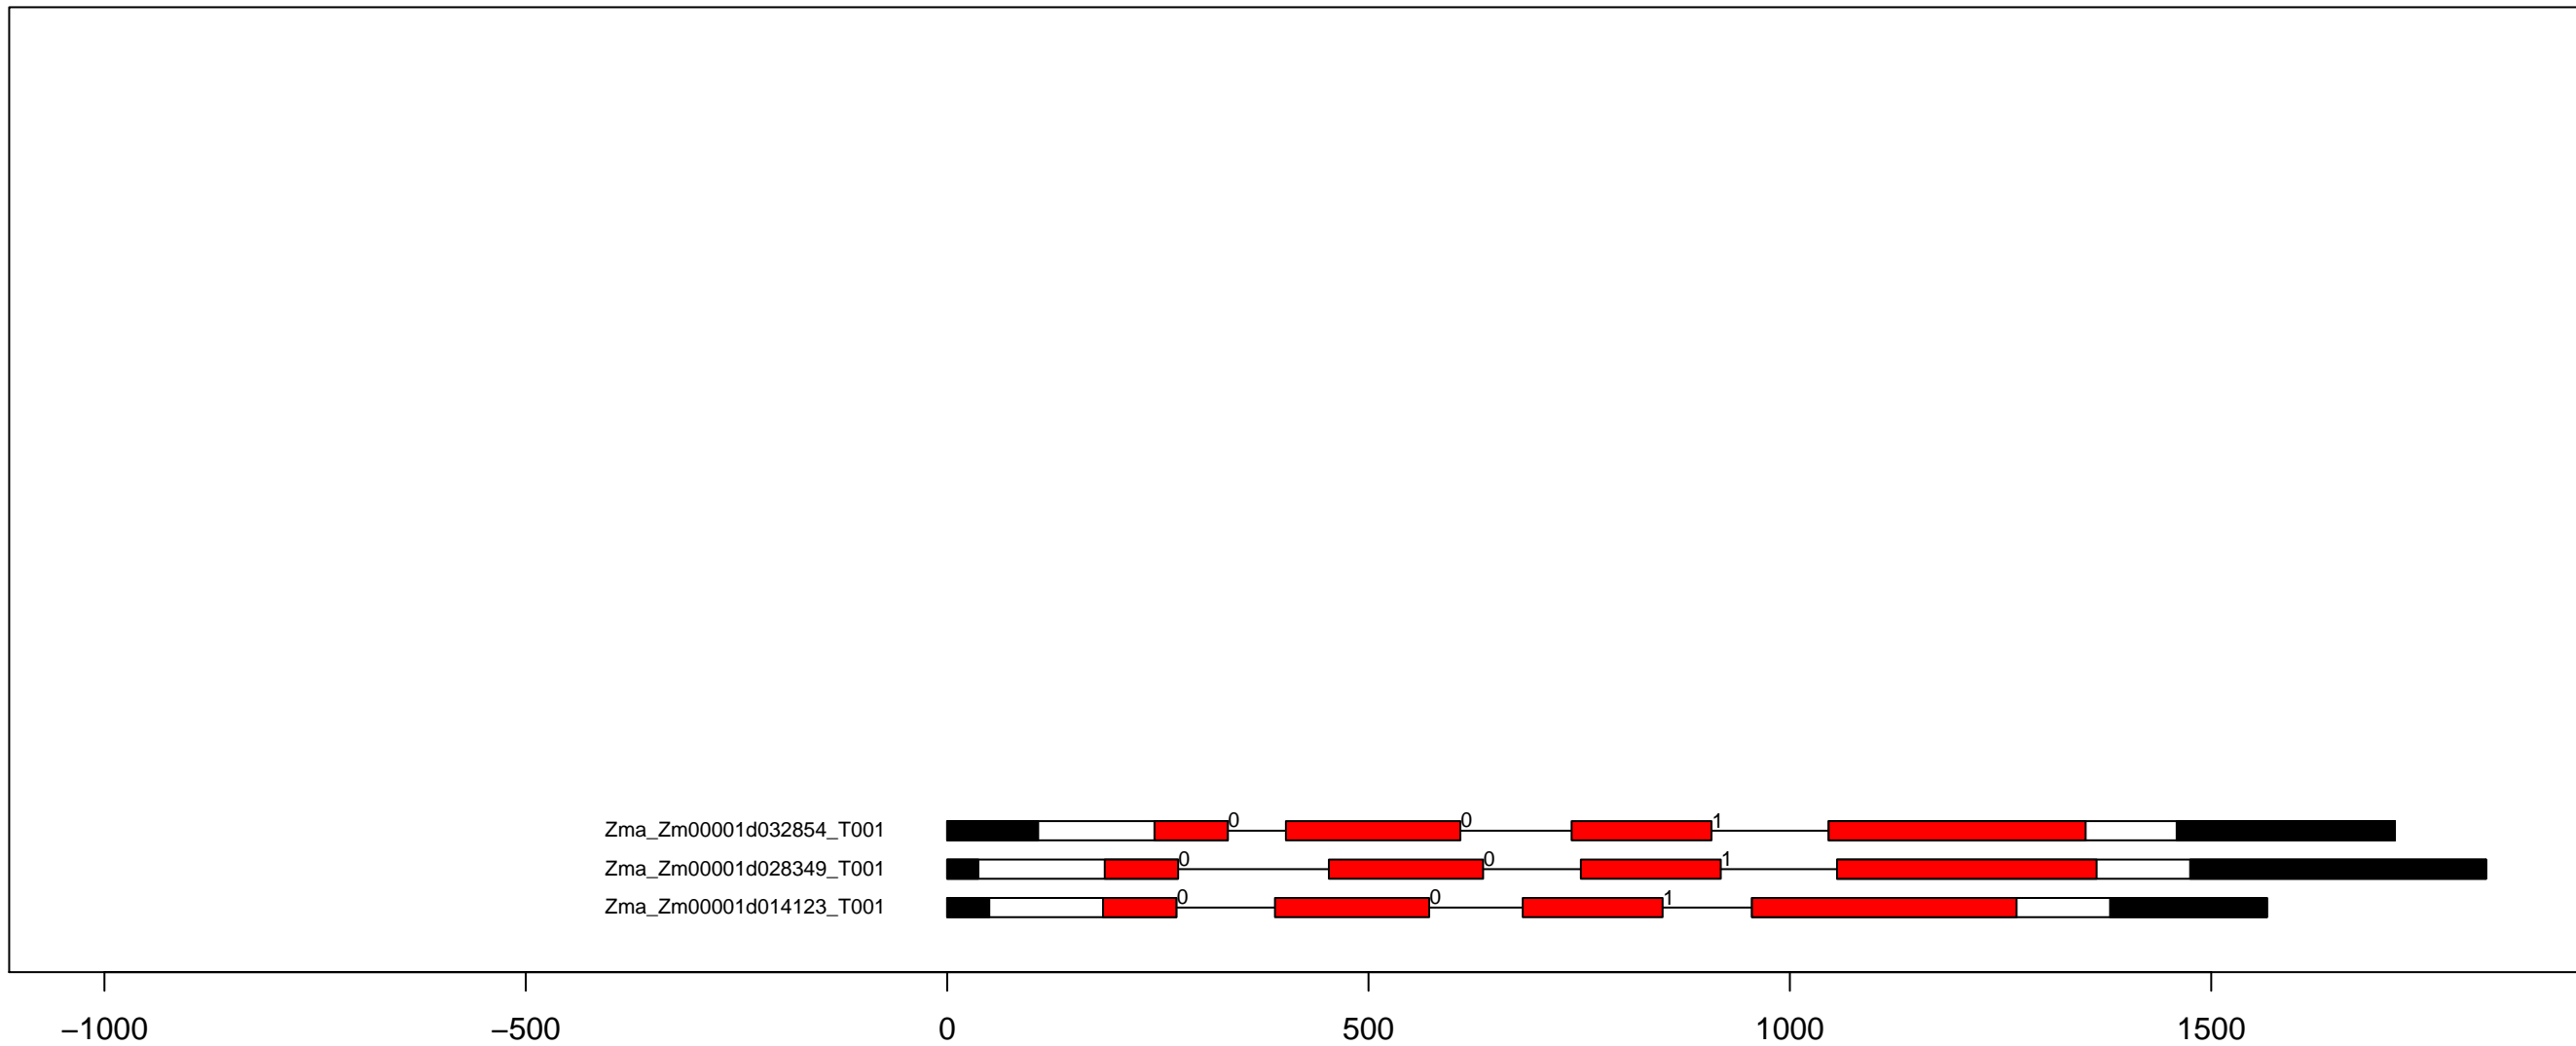

# Z.ma class III peroxidase XIV subfamily exon-intron and prx domain diagram (all)

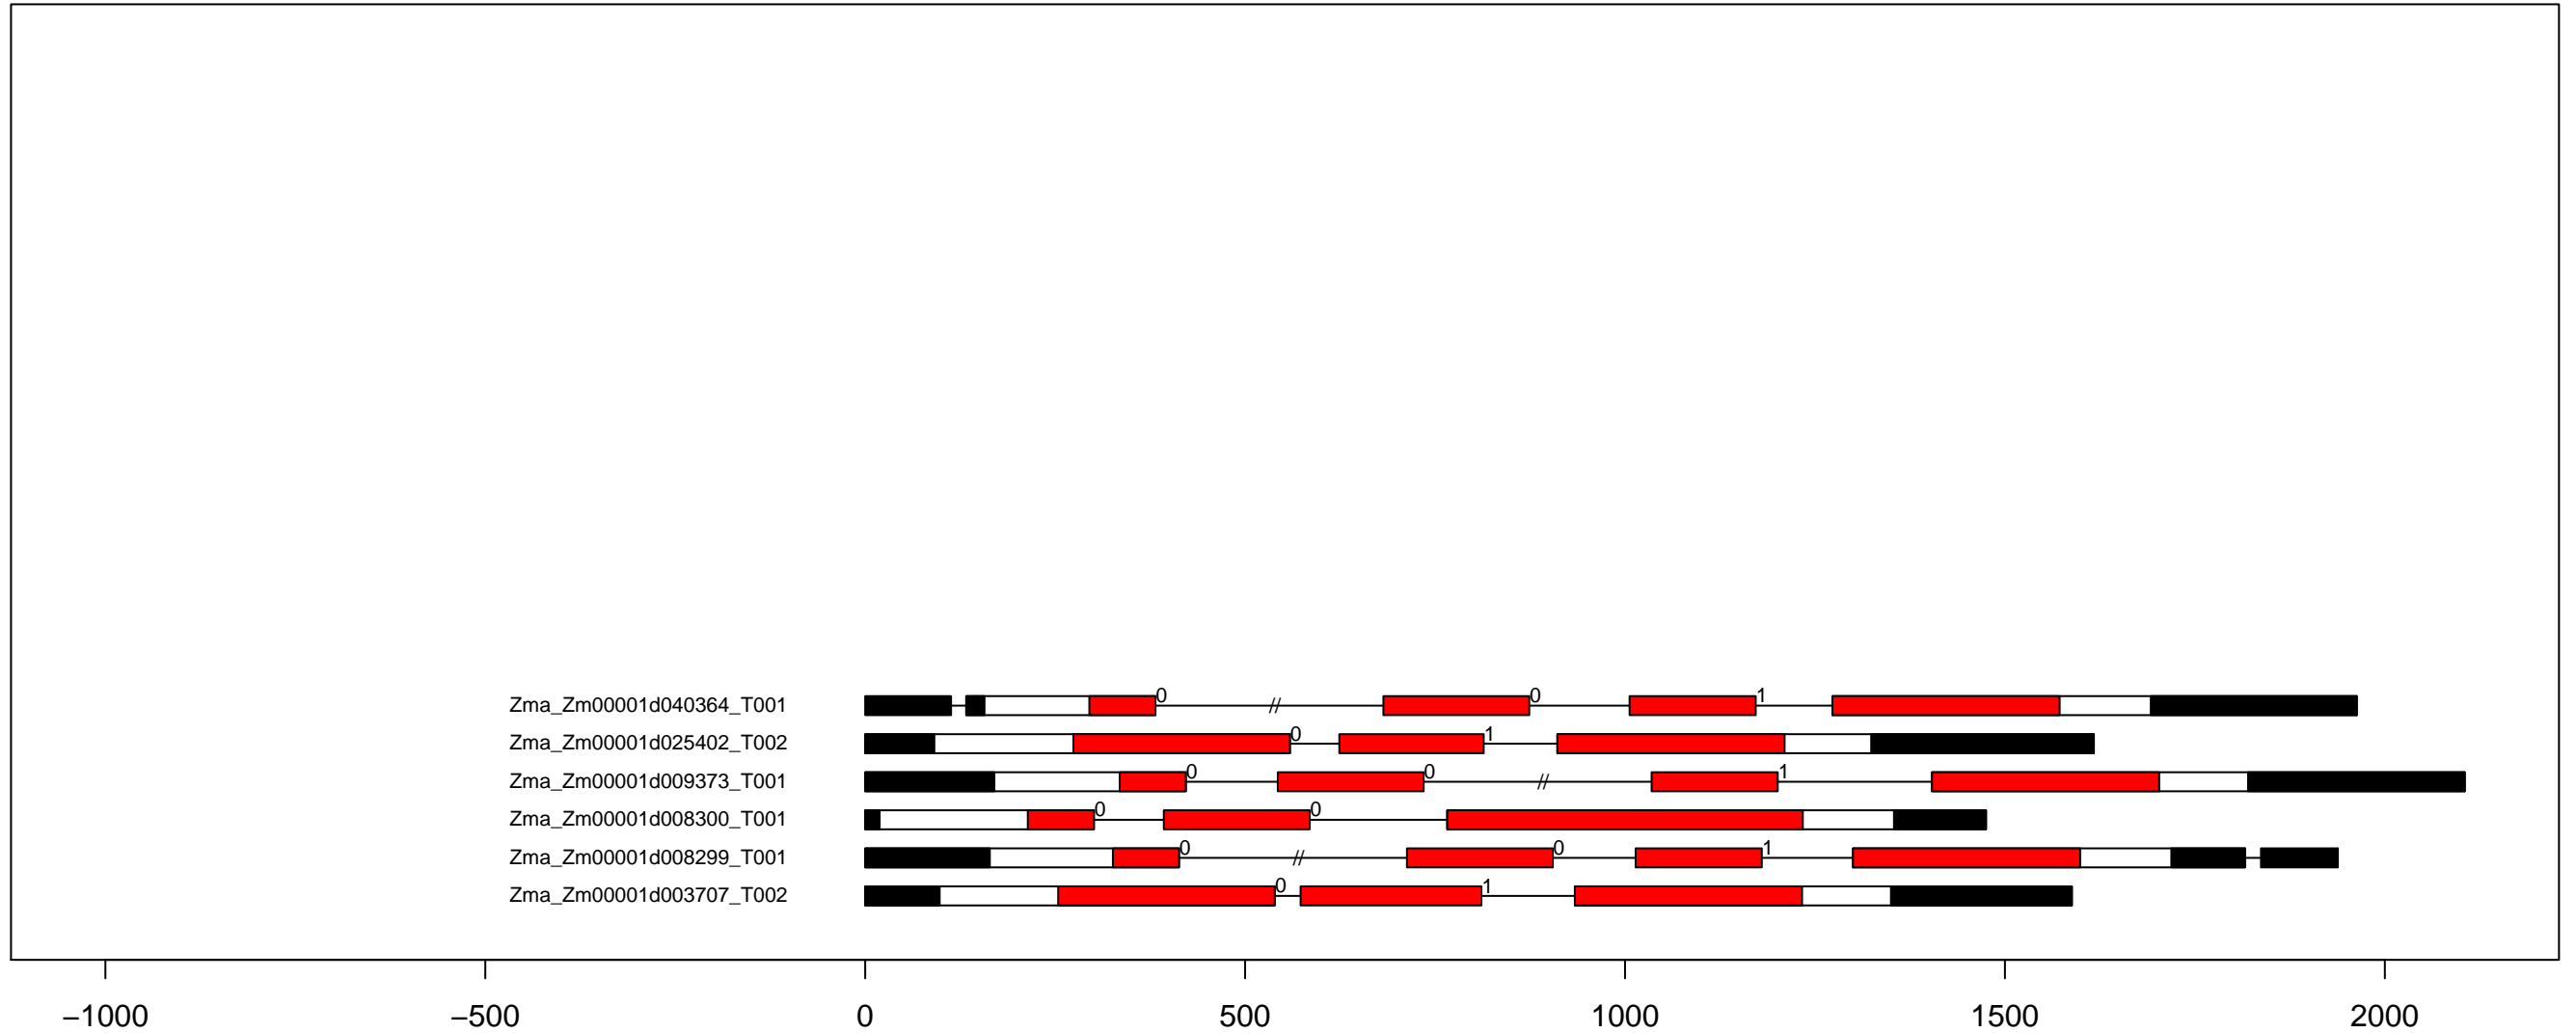

# Z.ma class III peroxidase XV subfamily exon-intron and prx domain diagram (all)

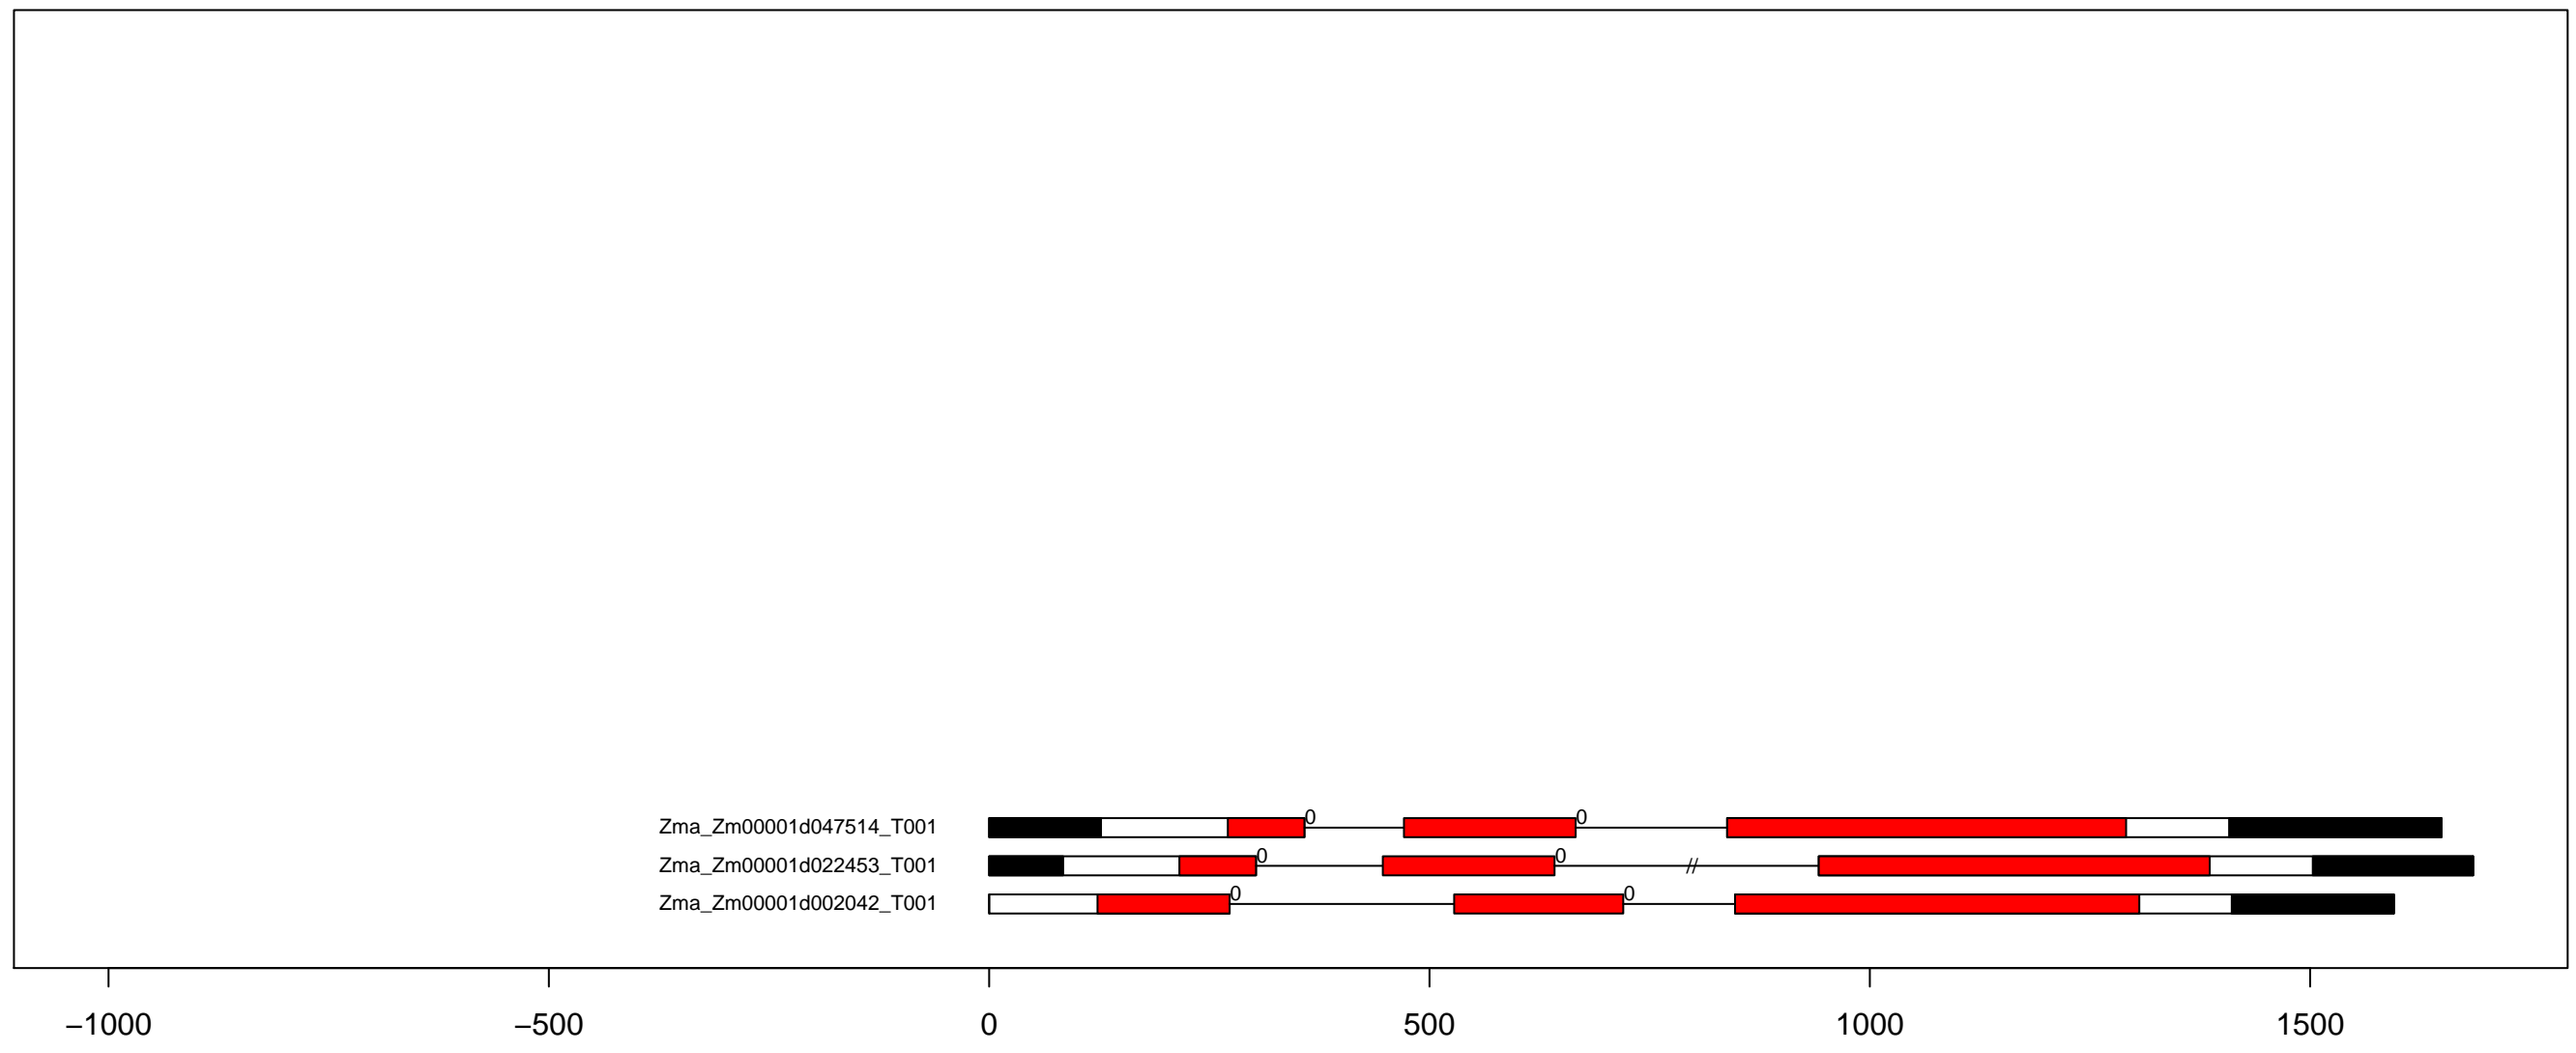

# Z.ma class III peroxidase XVI subfamily exon-intron and prx domain diagram (all)

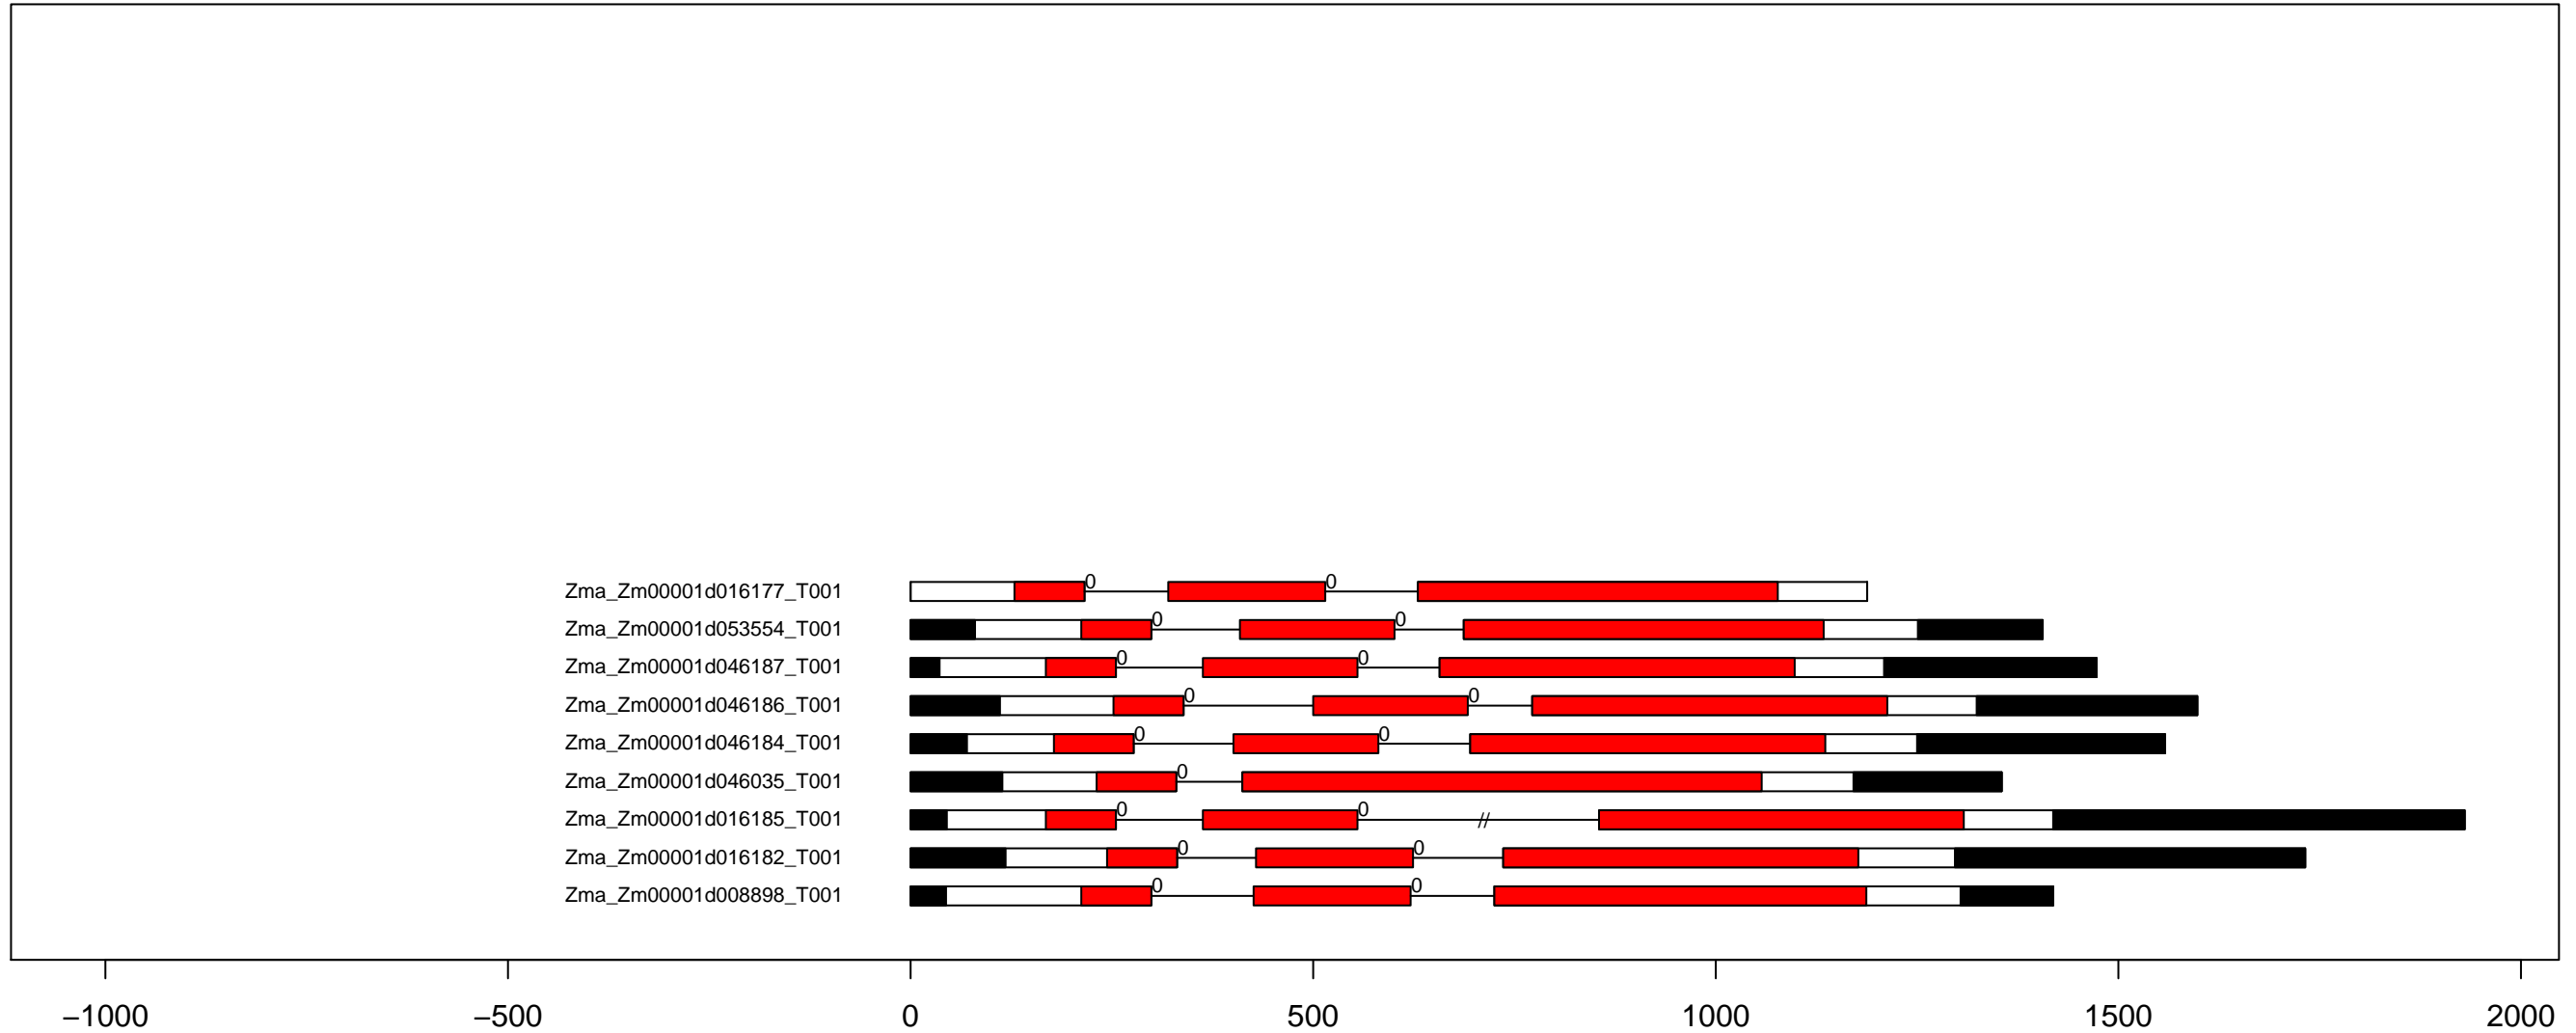

# Z.ma class III peroxidase XVII subfamily exon-intron and prx domain diagram (all)

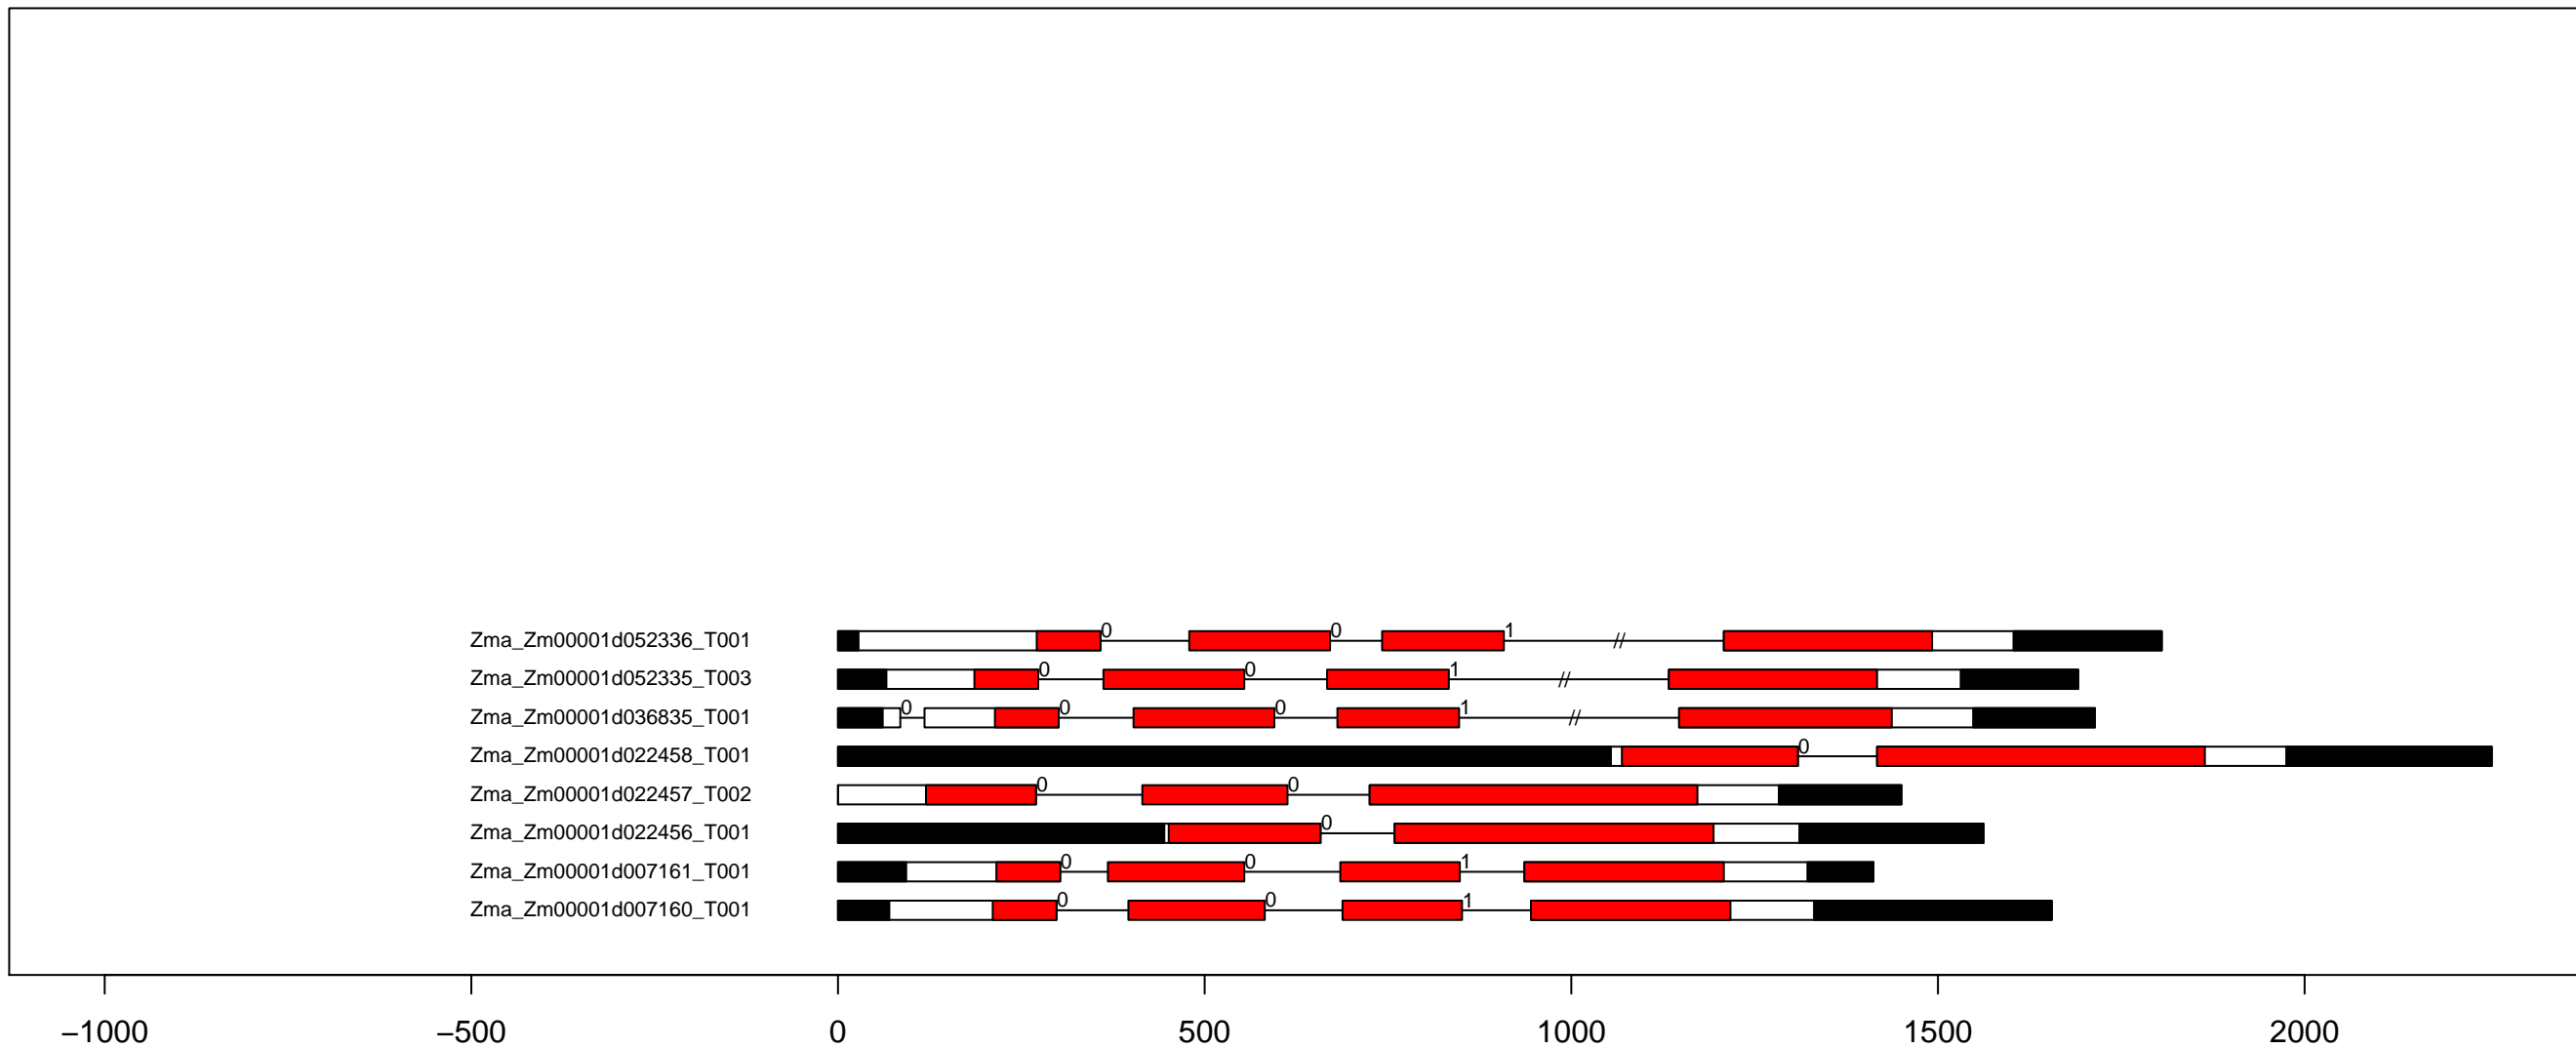



# Z.ma class III peroxidase XVIII subfamily exon-intron and prx domain diagram (all)

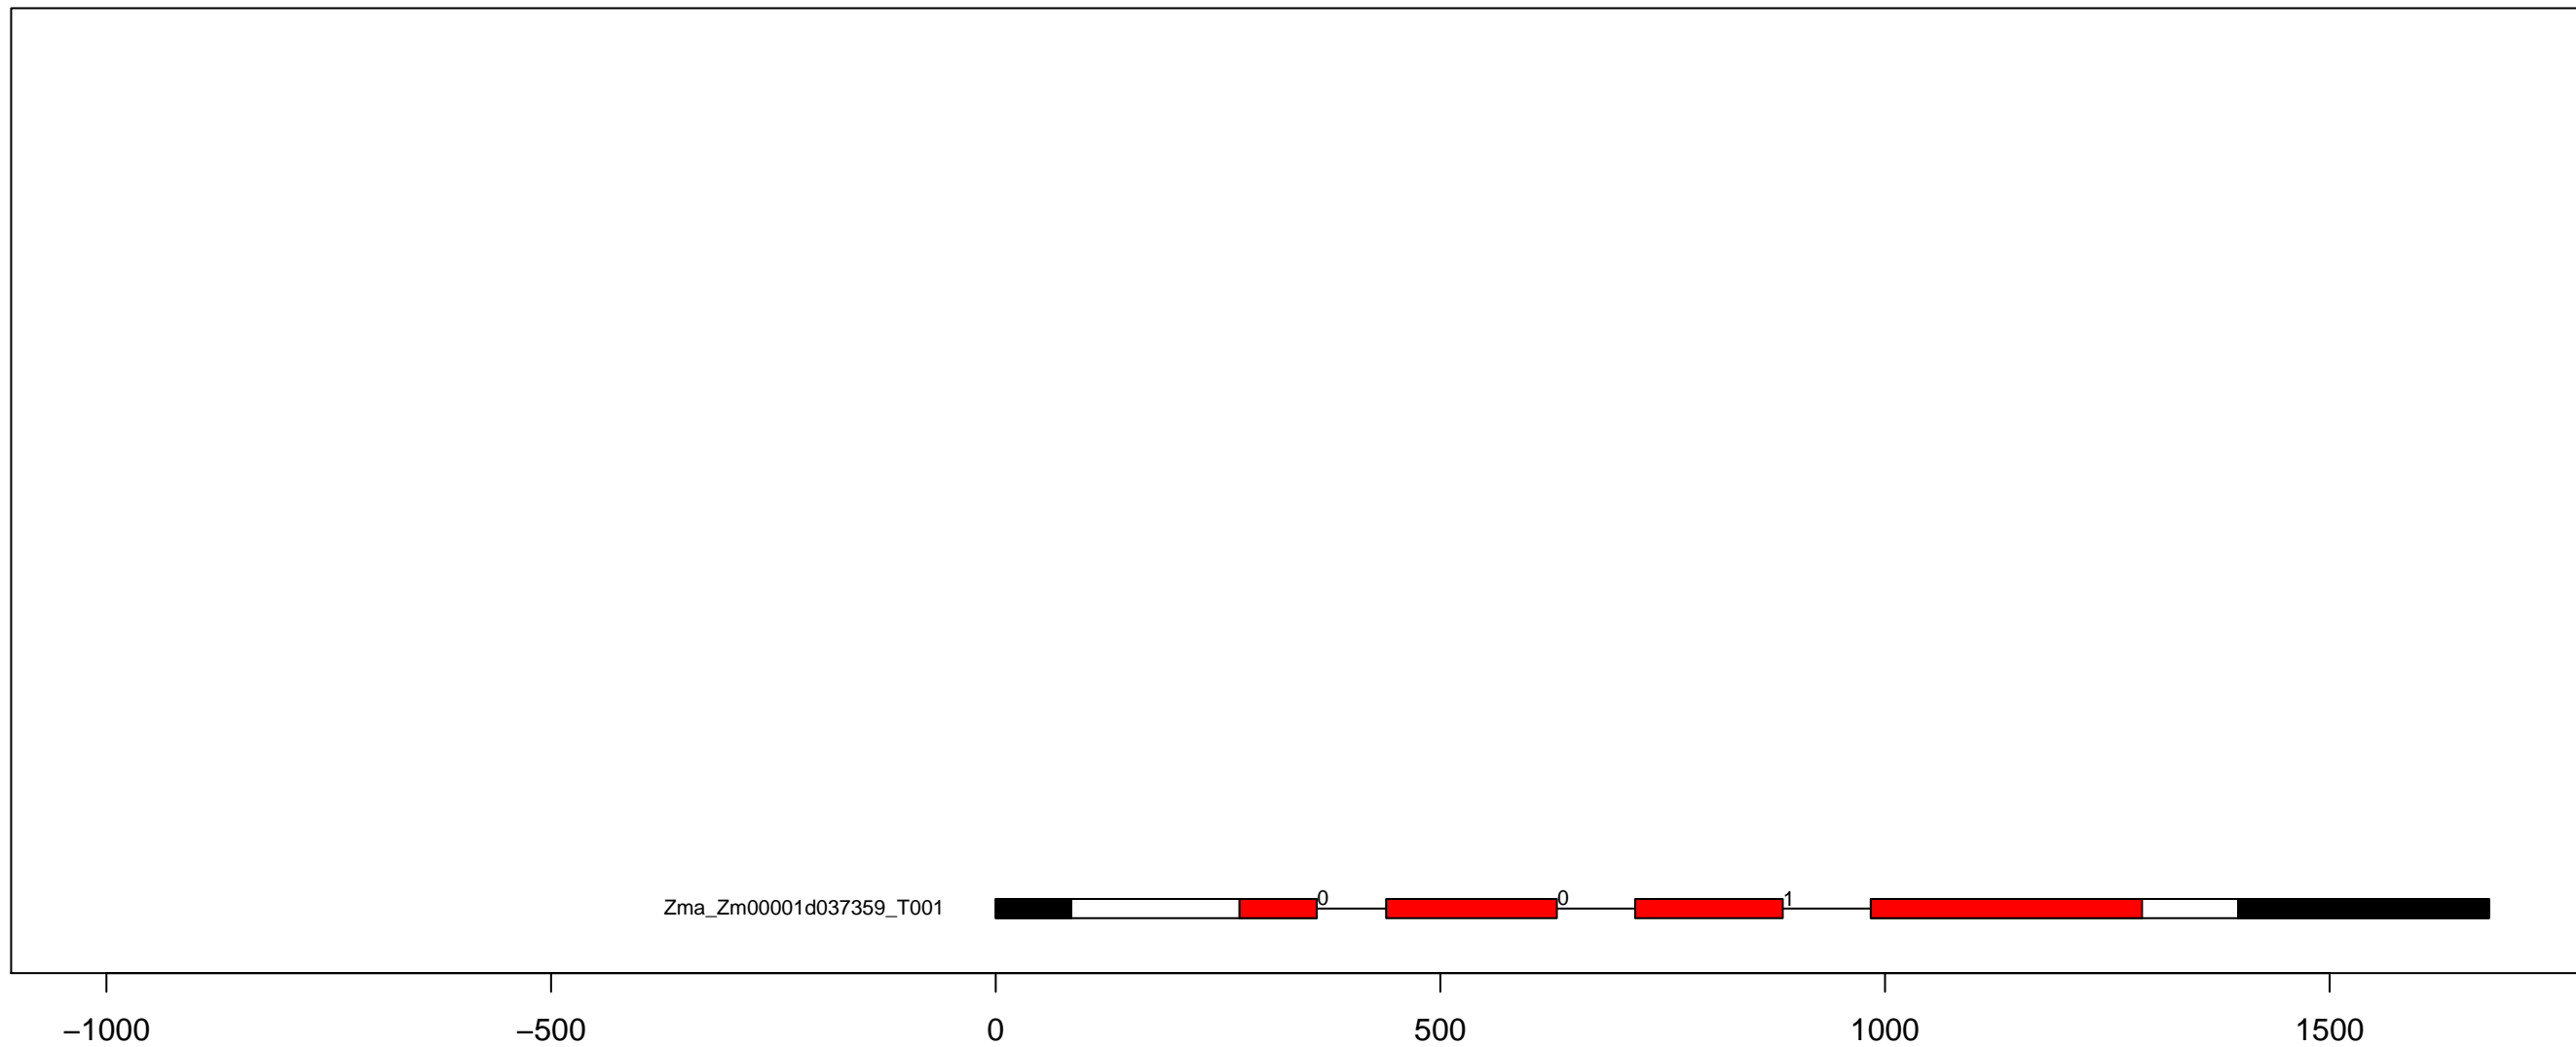

# Z.ma class III peroxidase unclar\_classifications subfamily exon-intron and prx domain diagram (all)

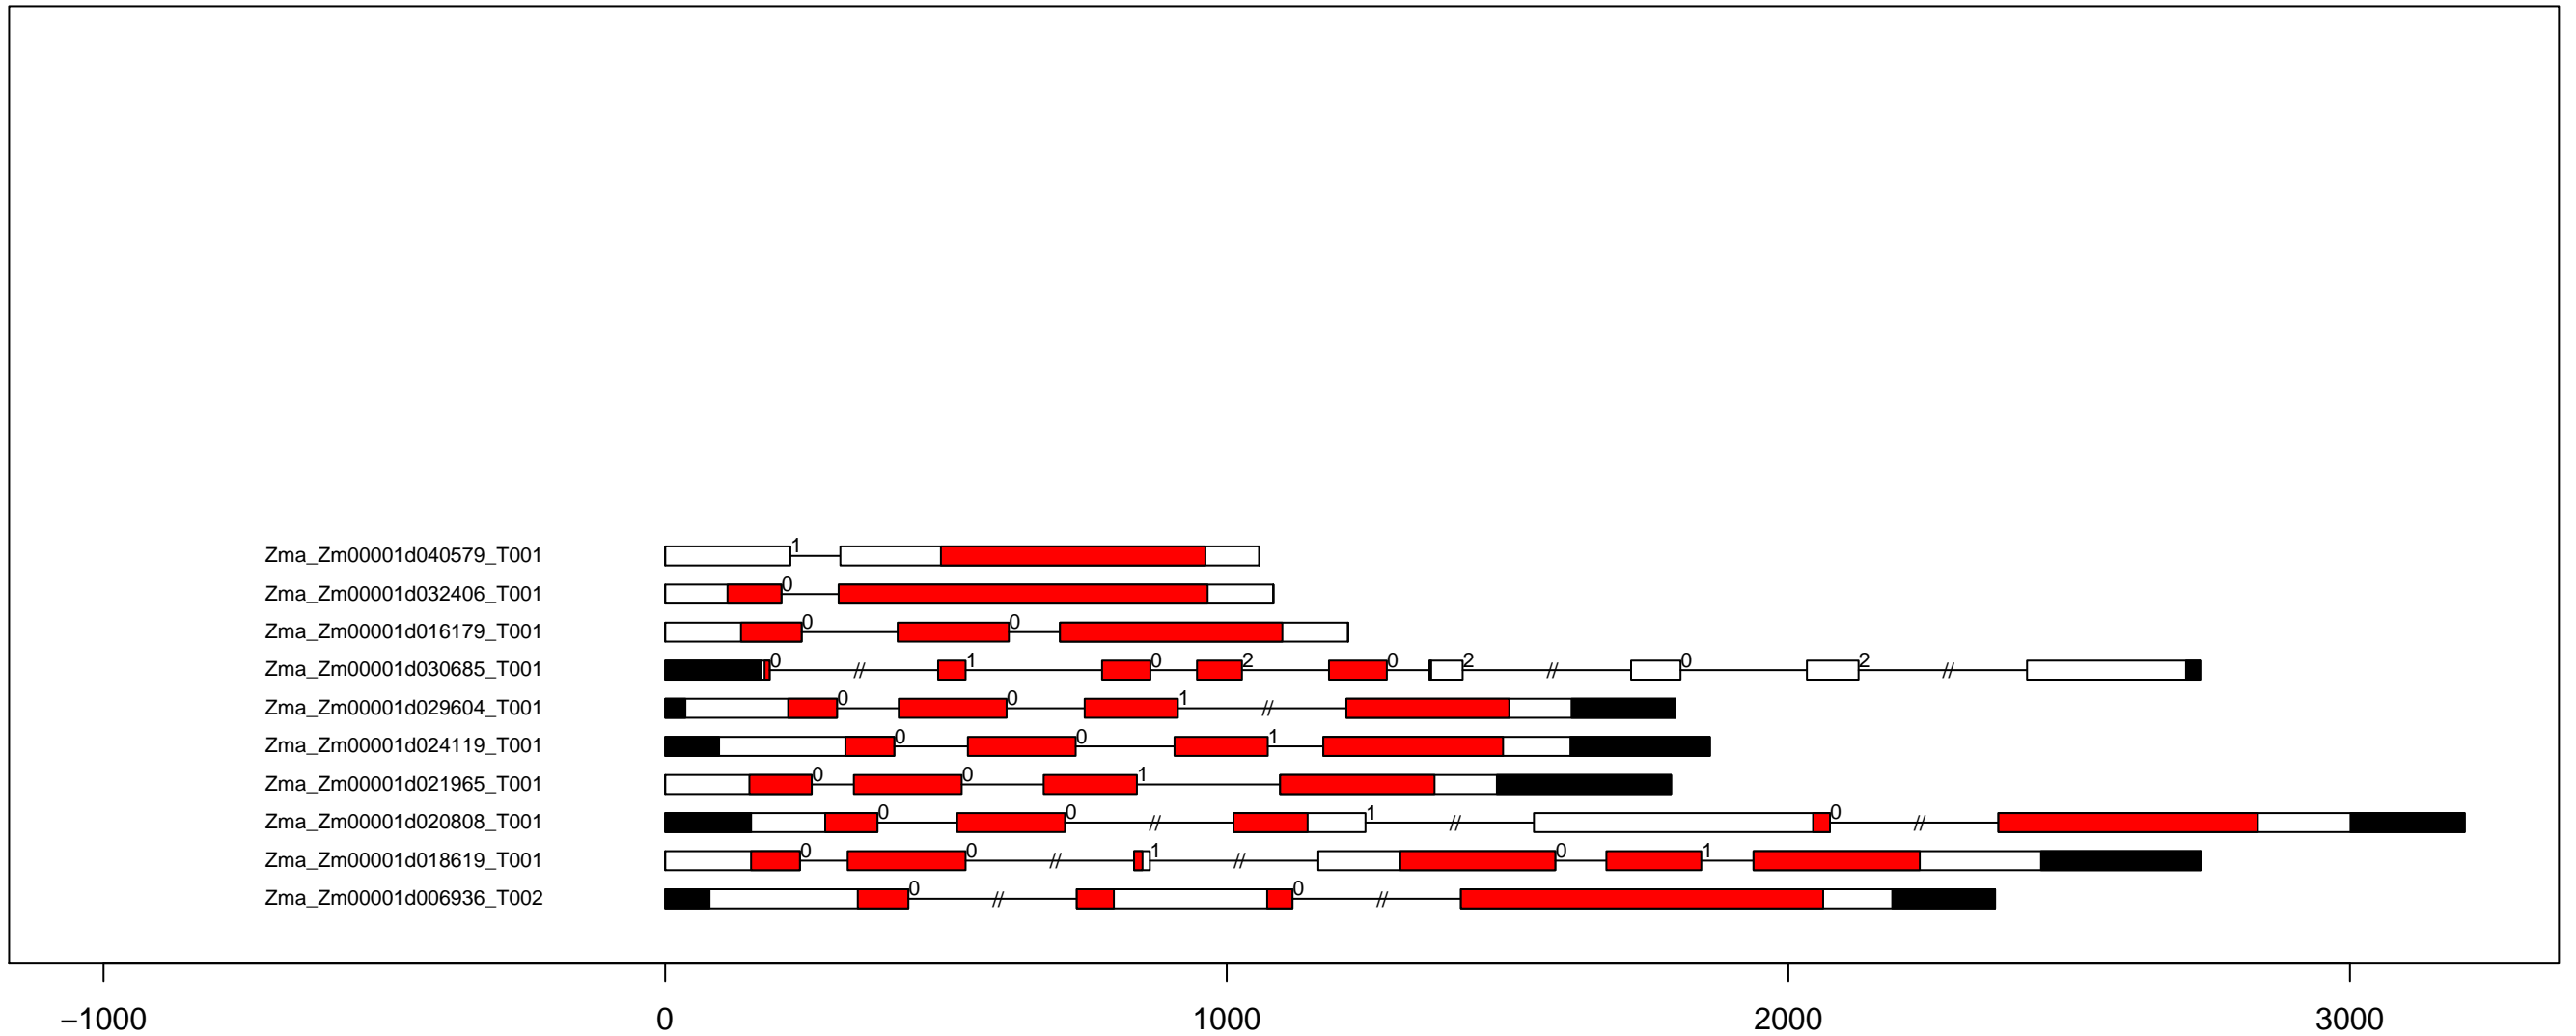

# A.th class III peroxidase I subfamily exon-intron and prx domain diagram (all)

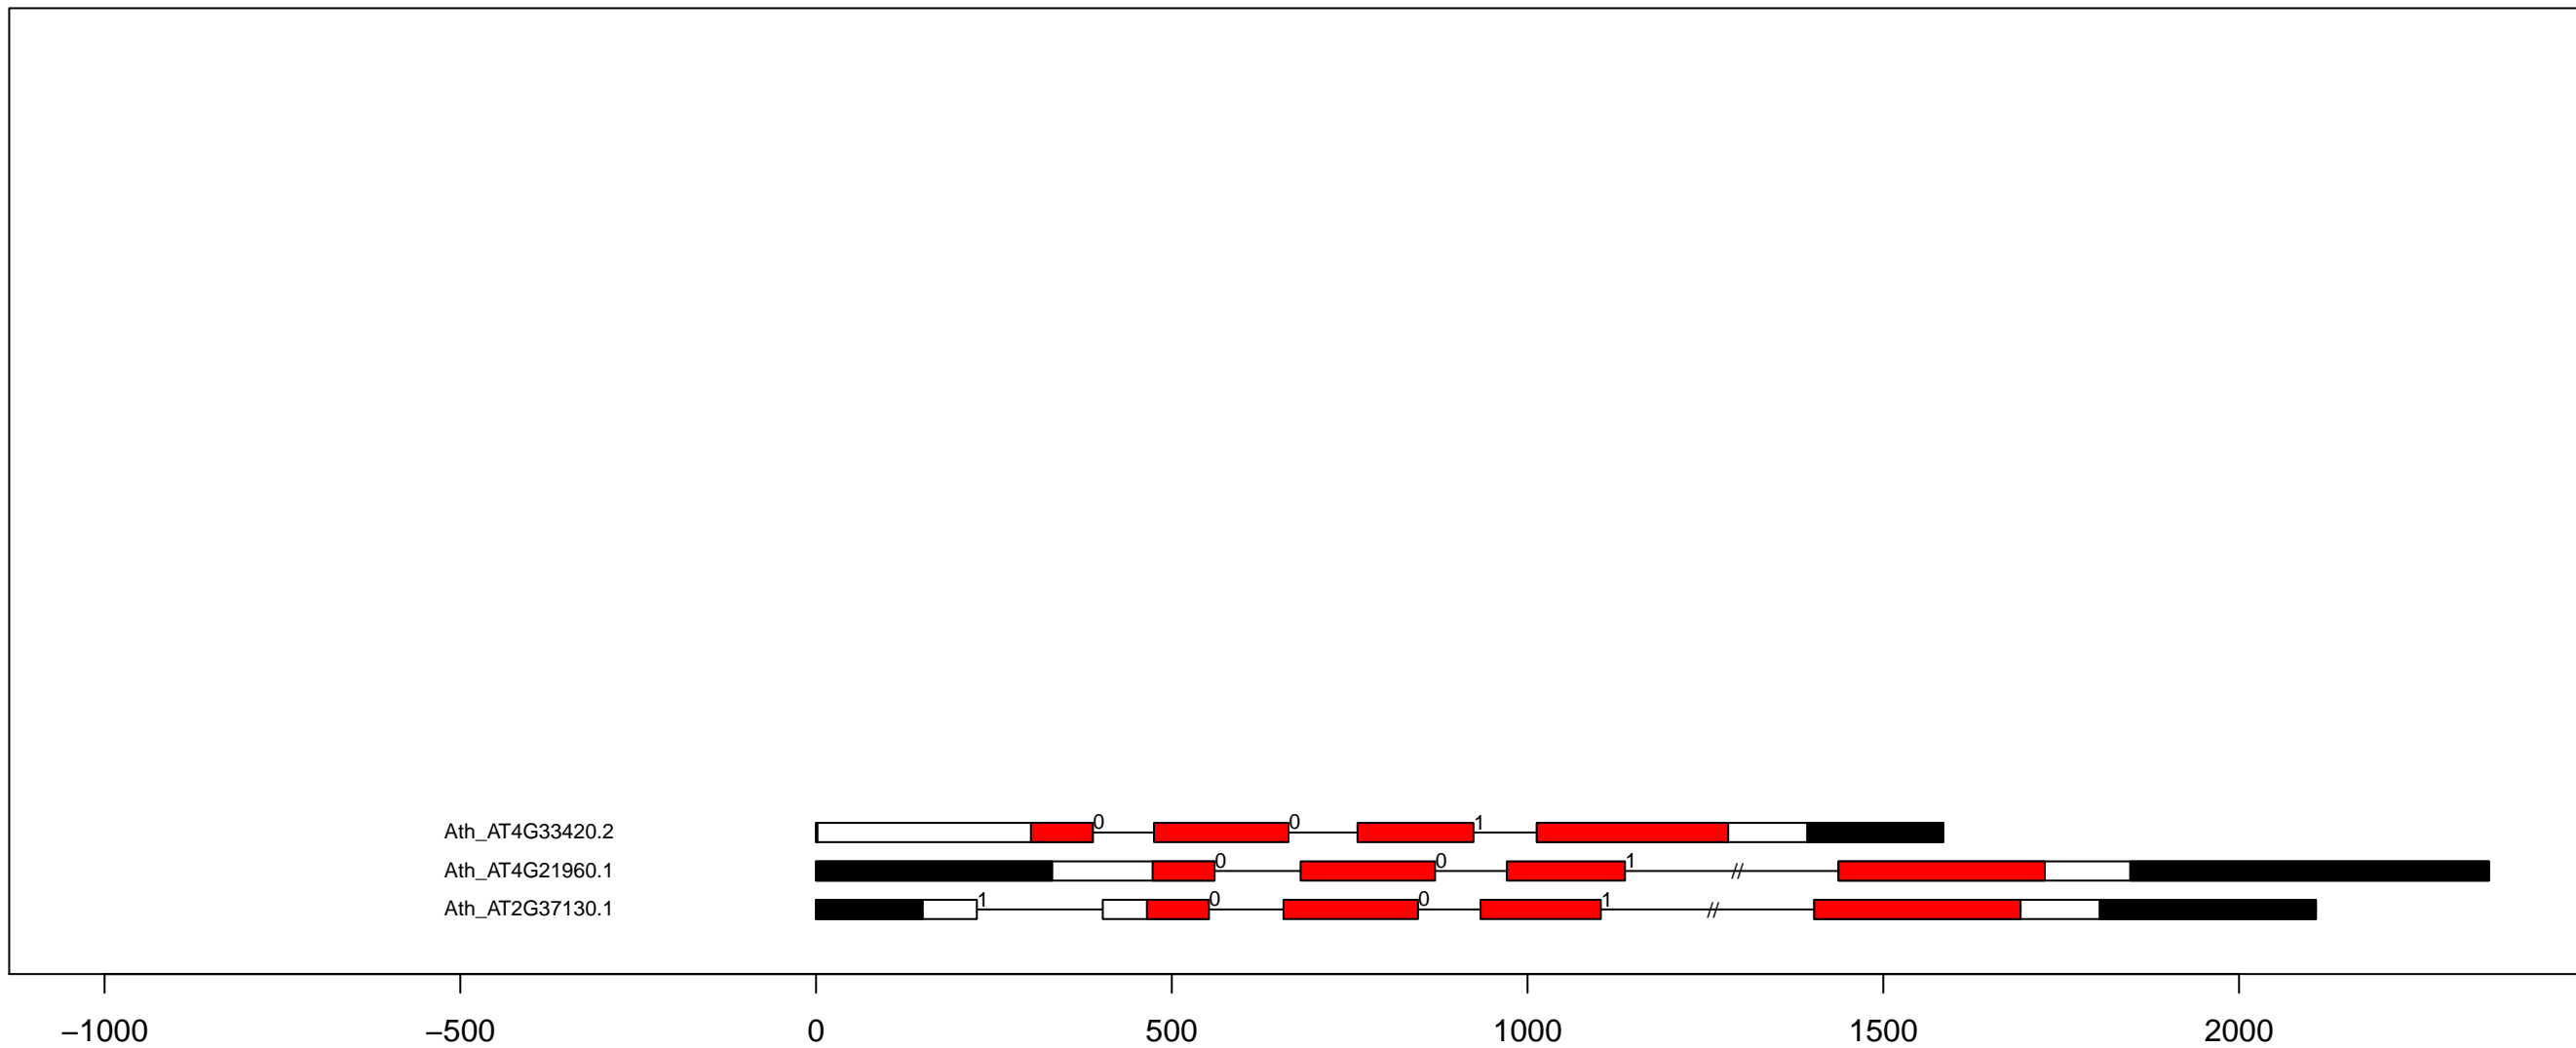

# A.th class III peroxidase V subfamily exon-intron and prx domain diagram (all)

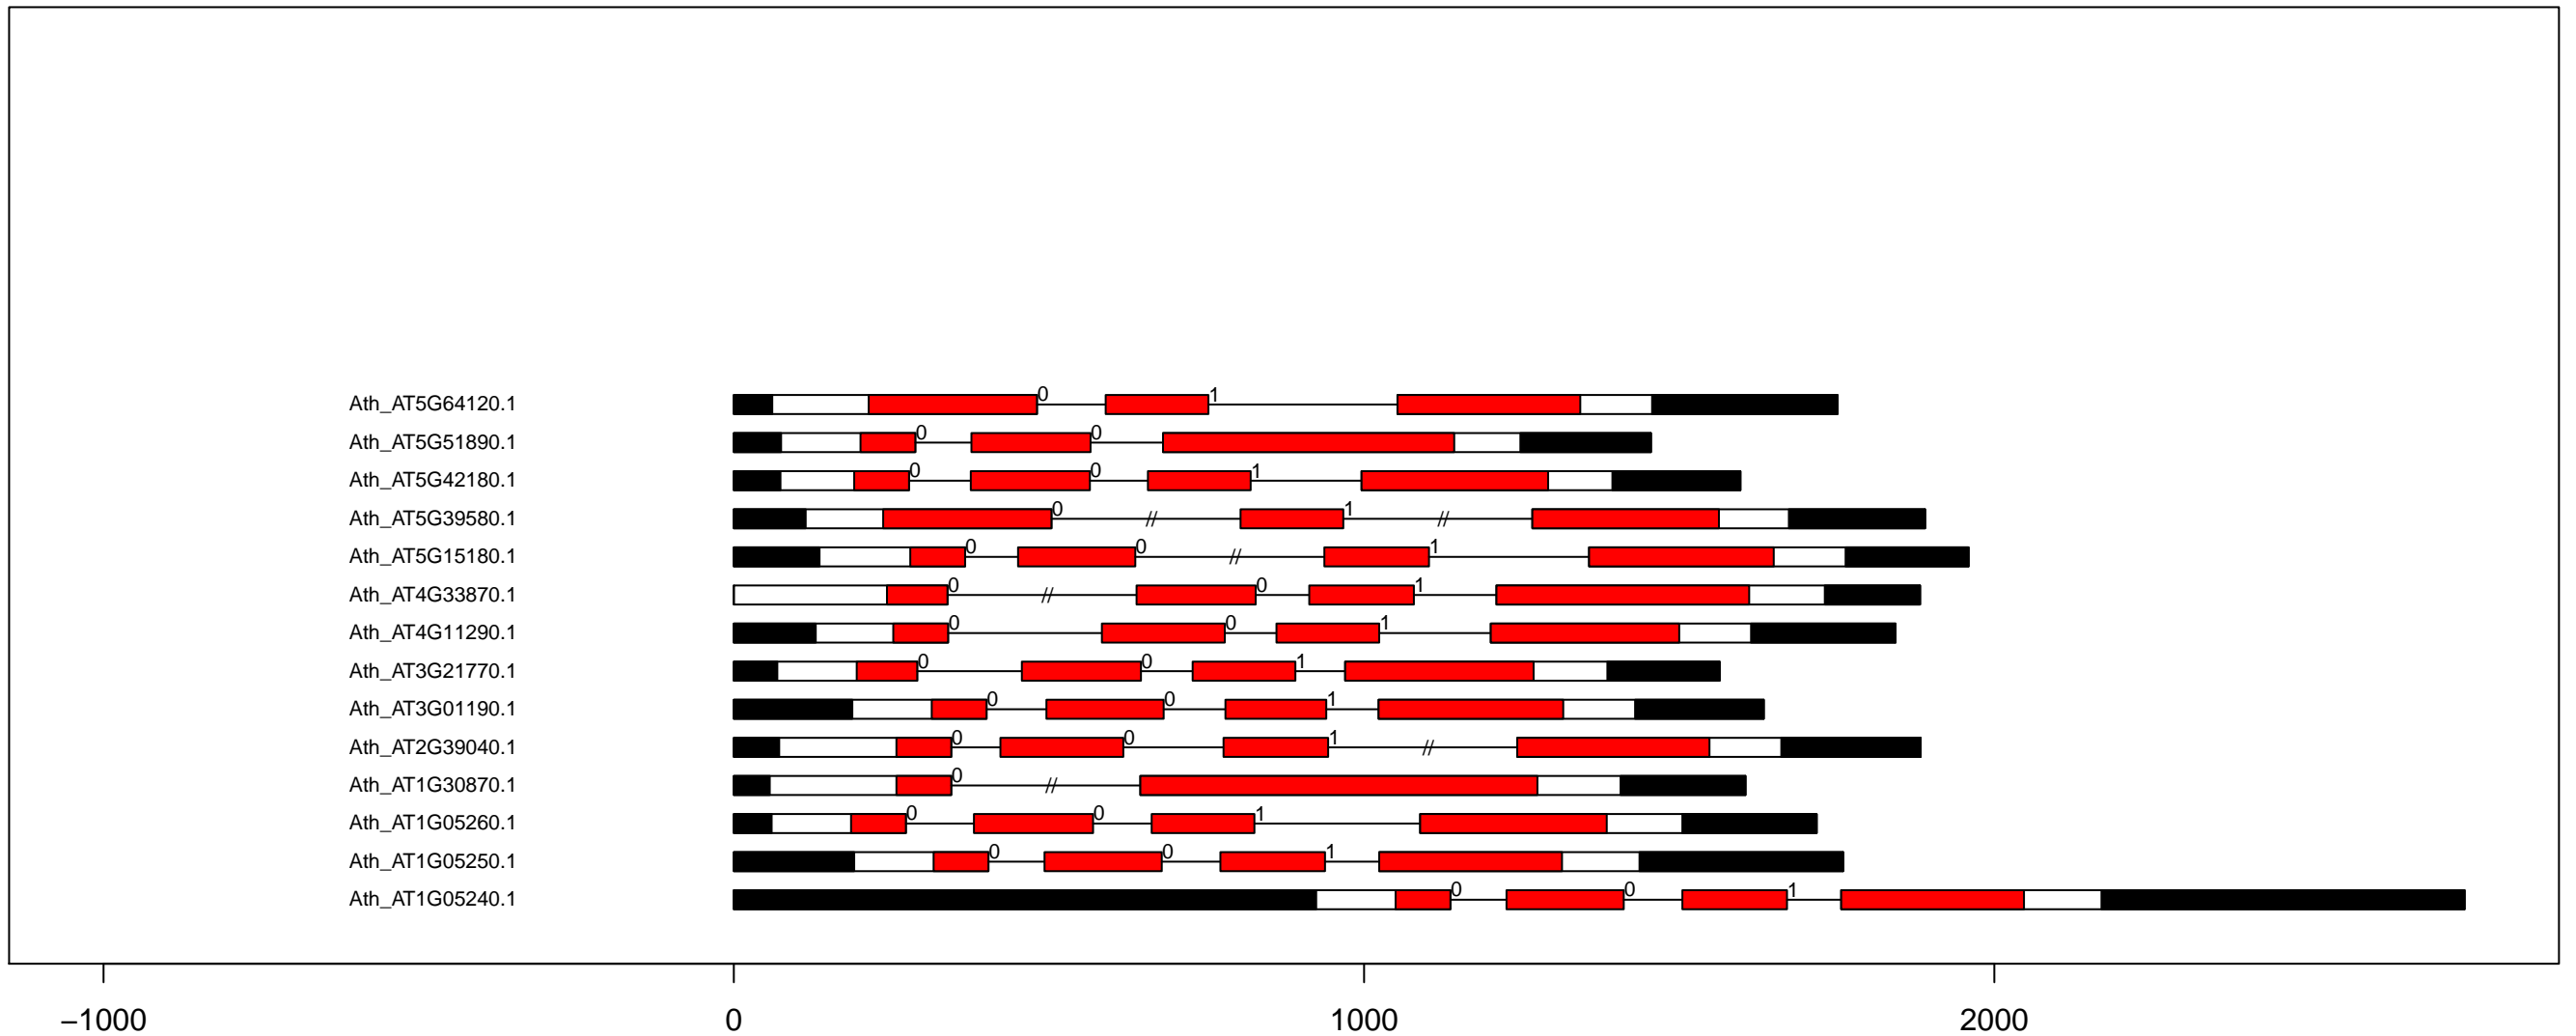

A.th class III peroxidase VI subfamily exon-intron and prx domain diagram (all)

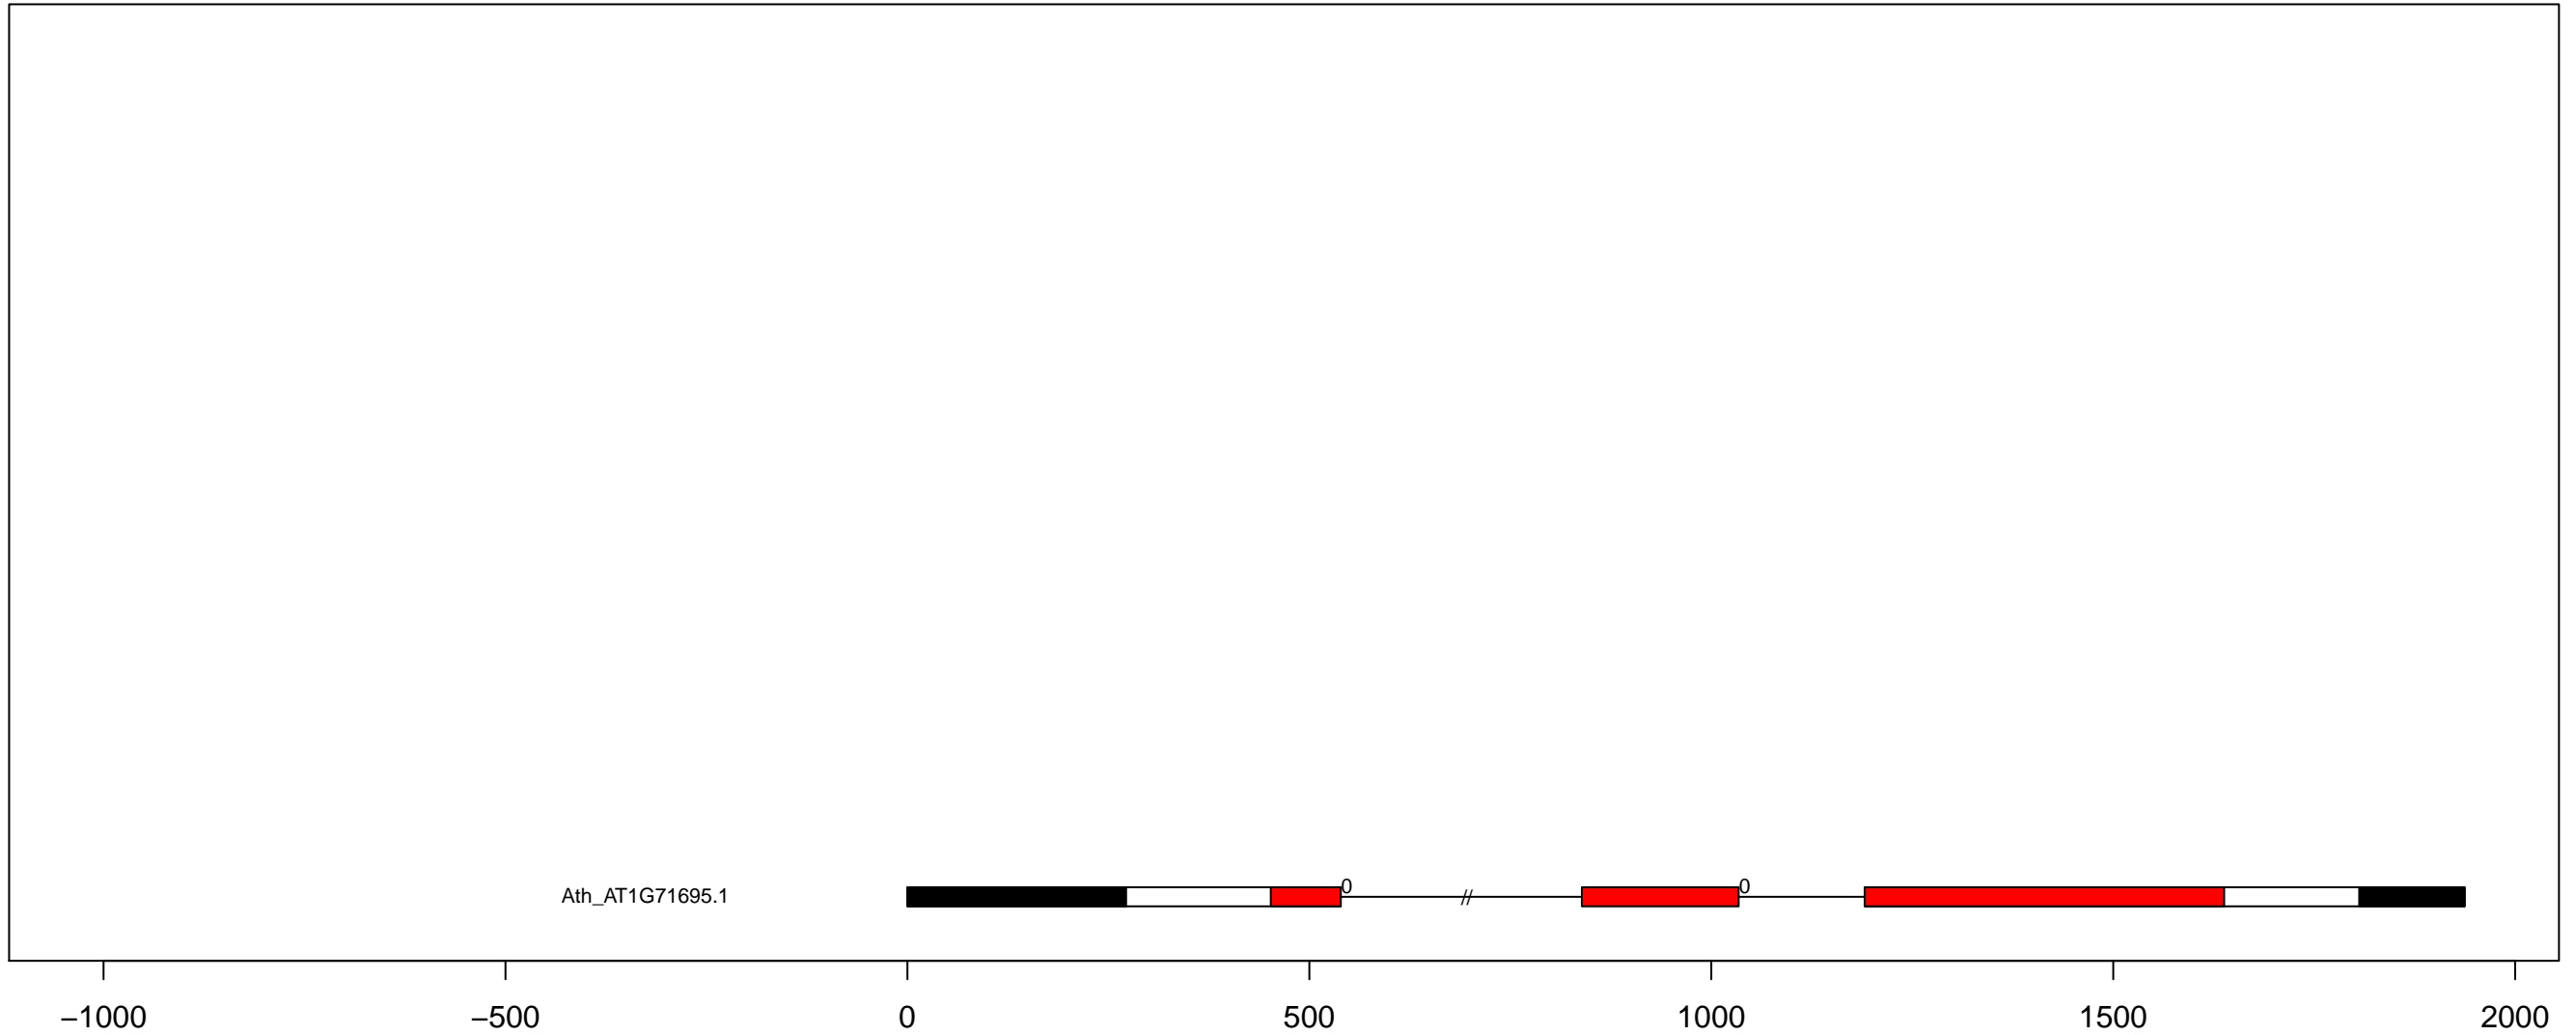



### A.th class III peroxidase IX subfamily exon-intron and prx domain diagram (all)

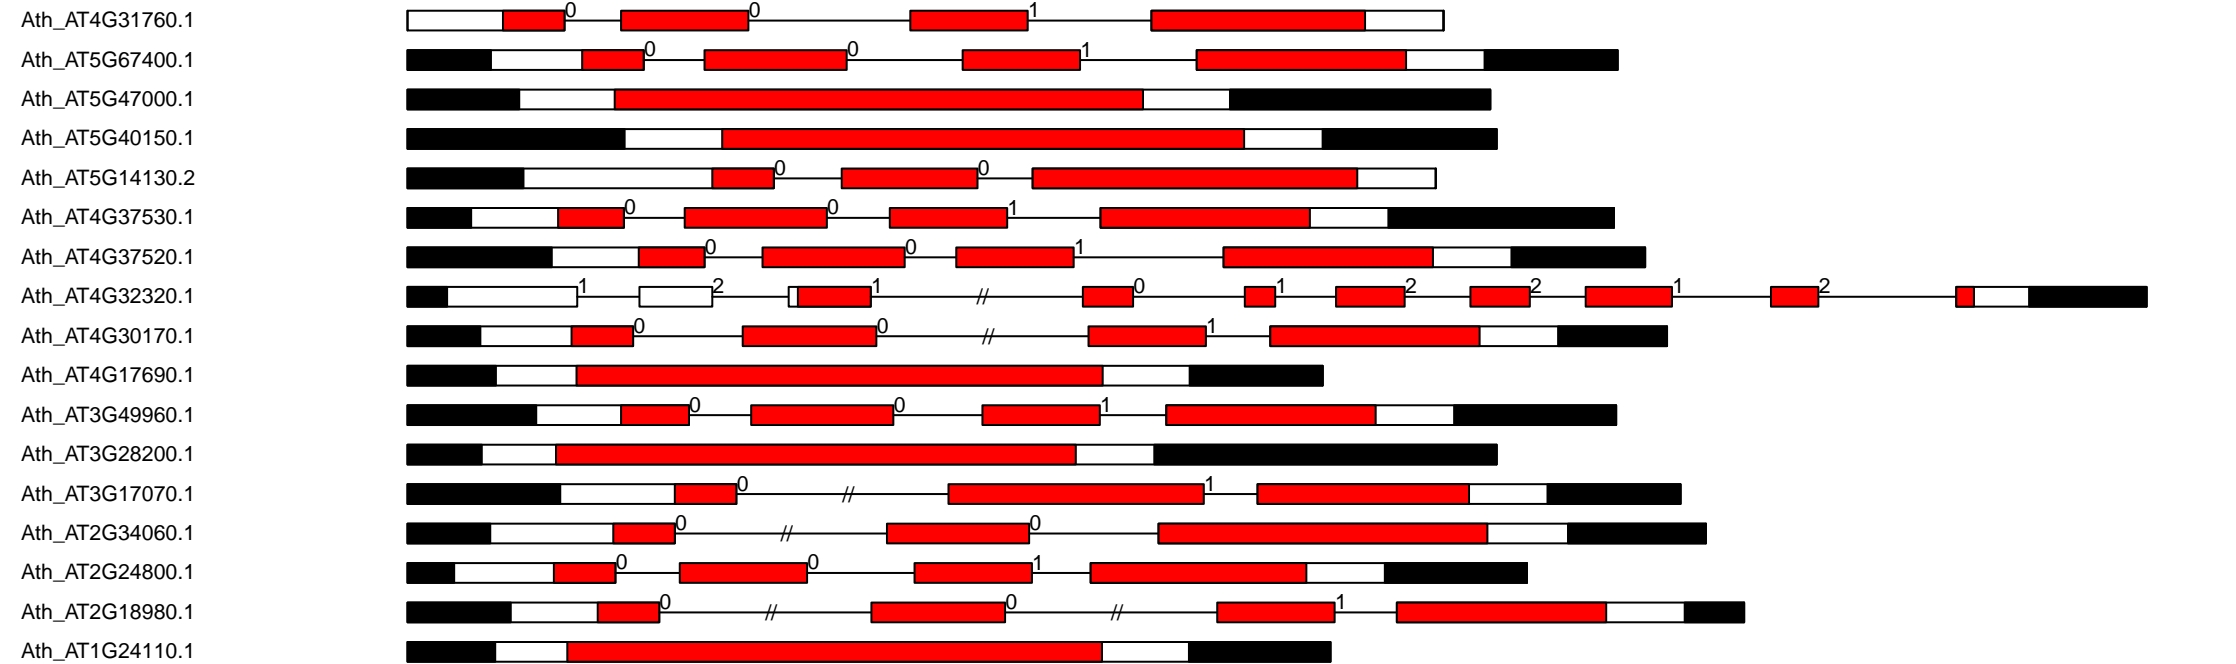

# A.th class III peroxidase X subfamily exon-intron and prx domain diagram (all)

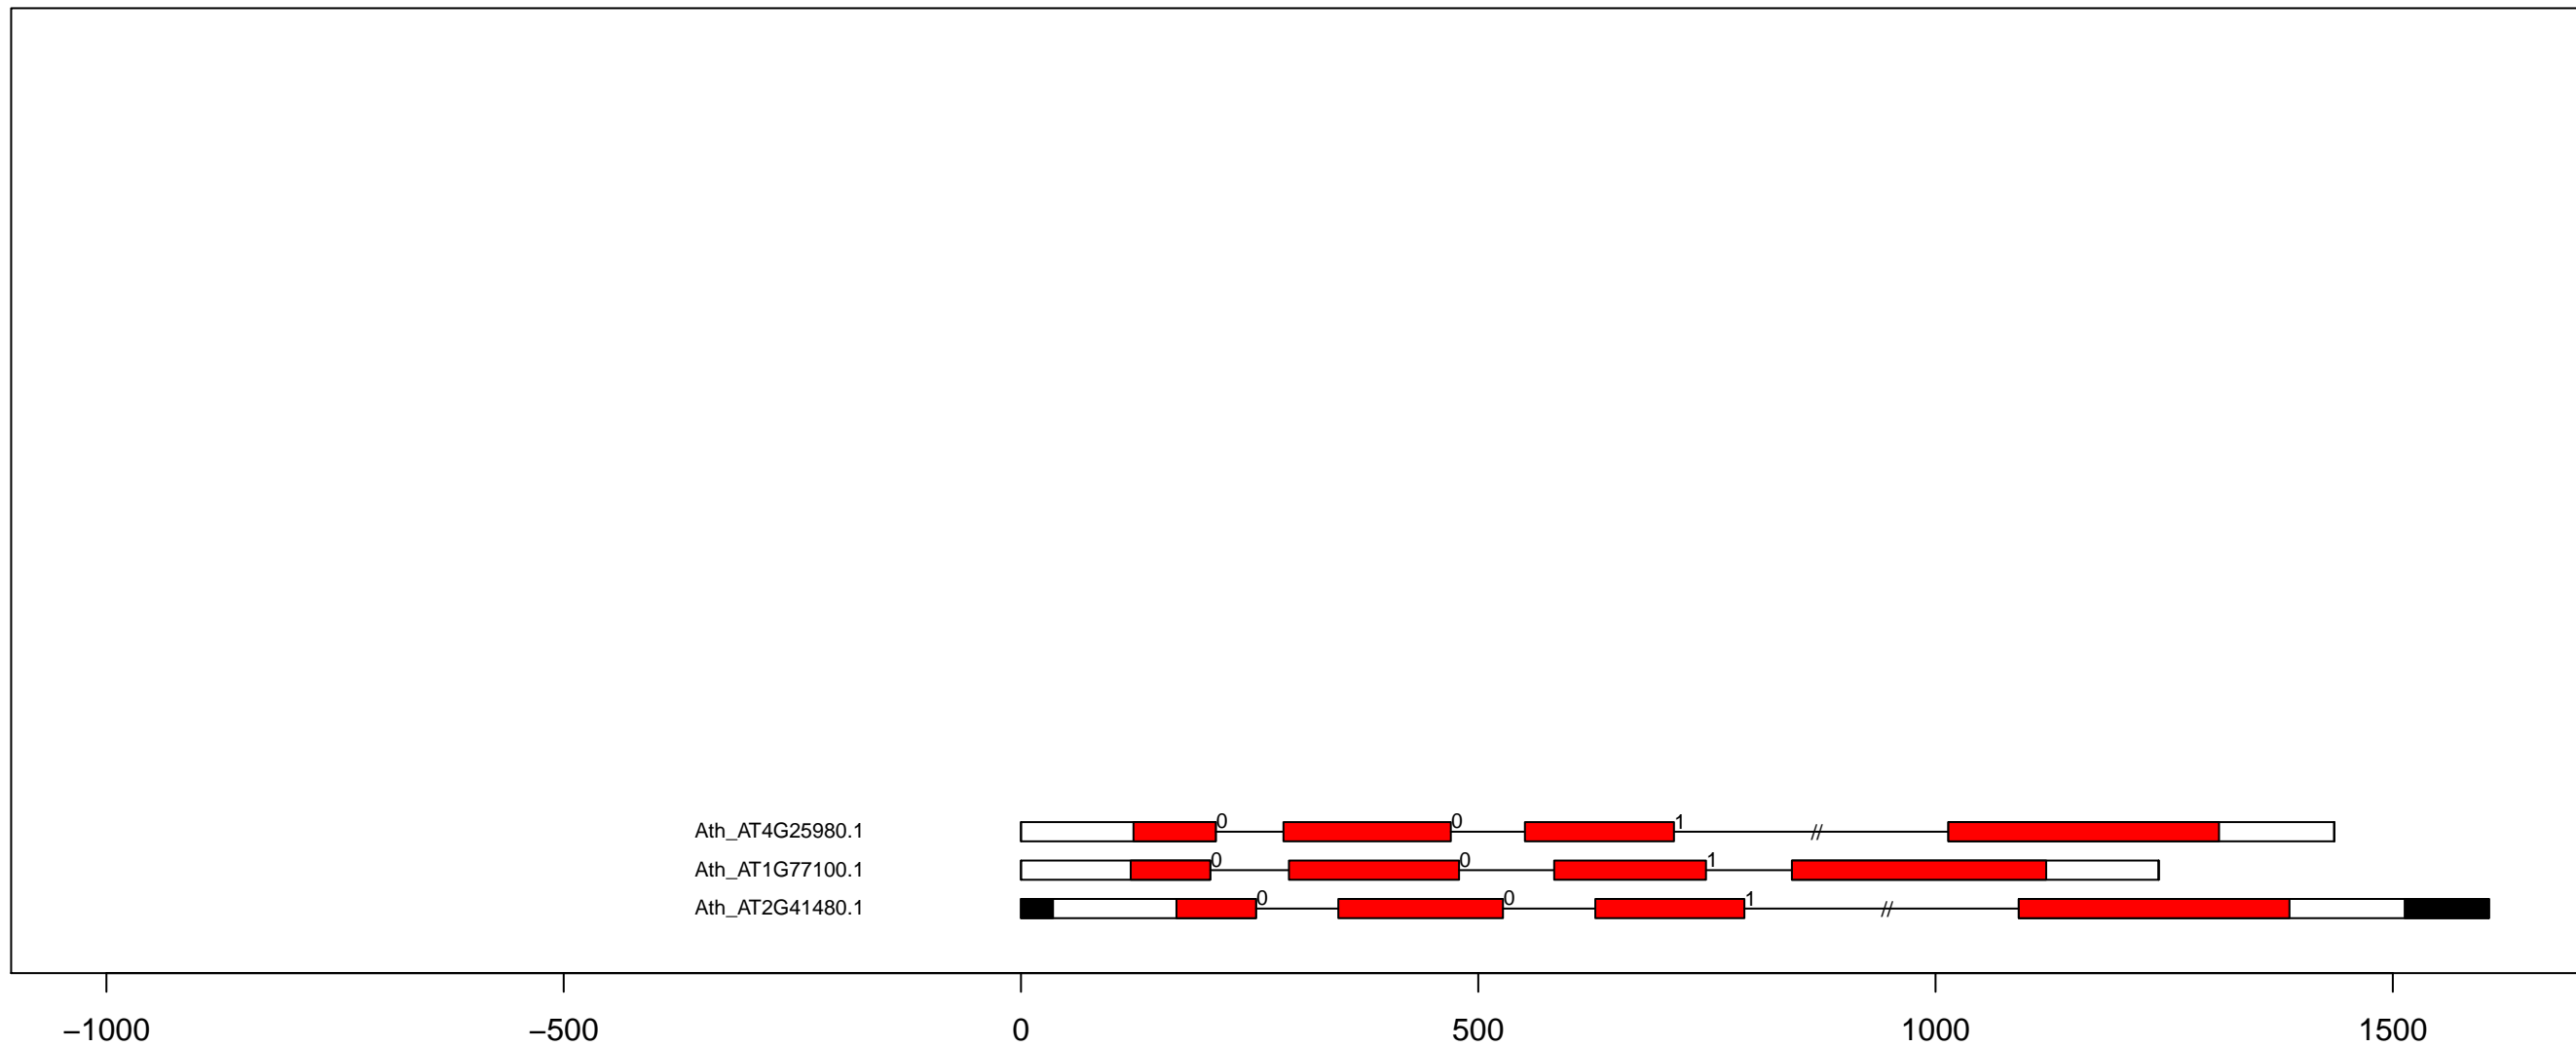



A.th class III peroxidase XI subfamily exon-intron and prx domain diagram (all)

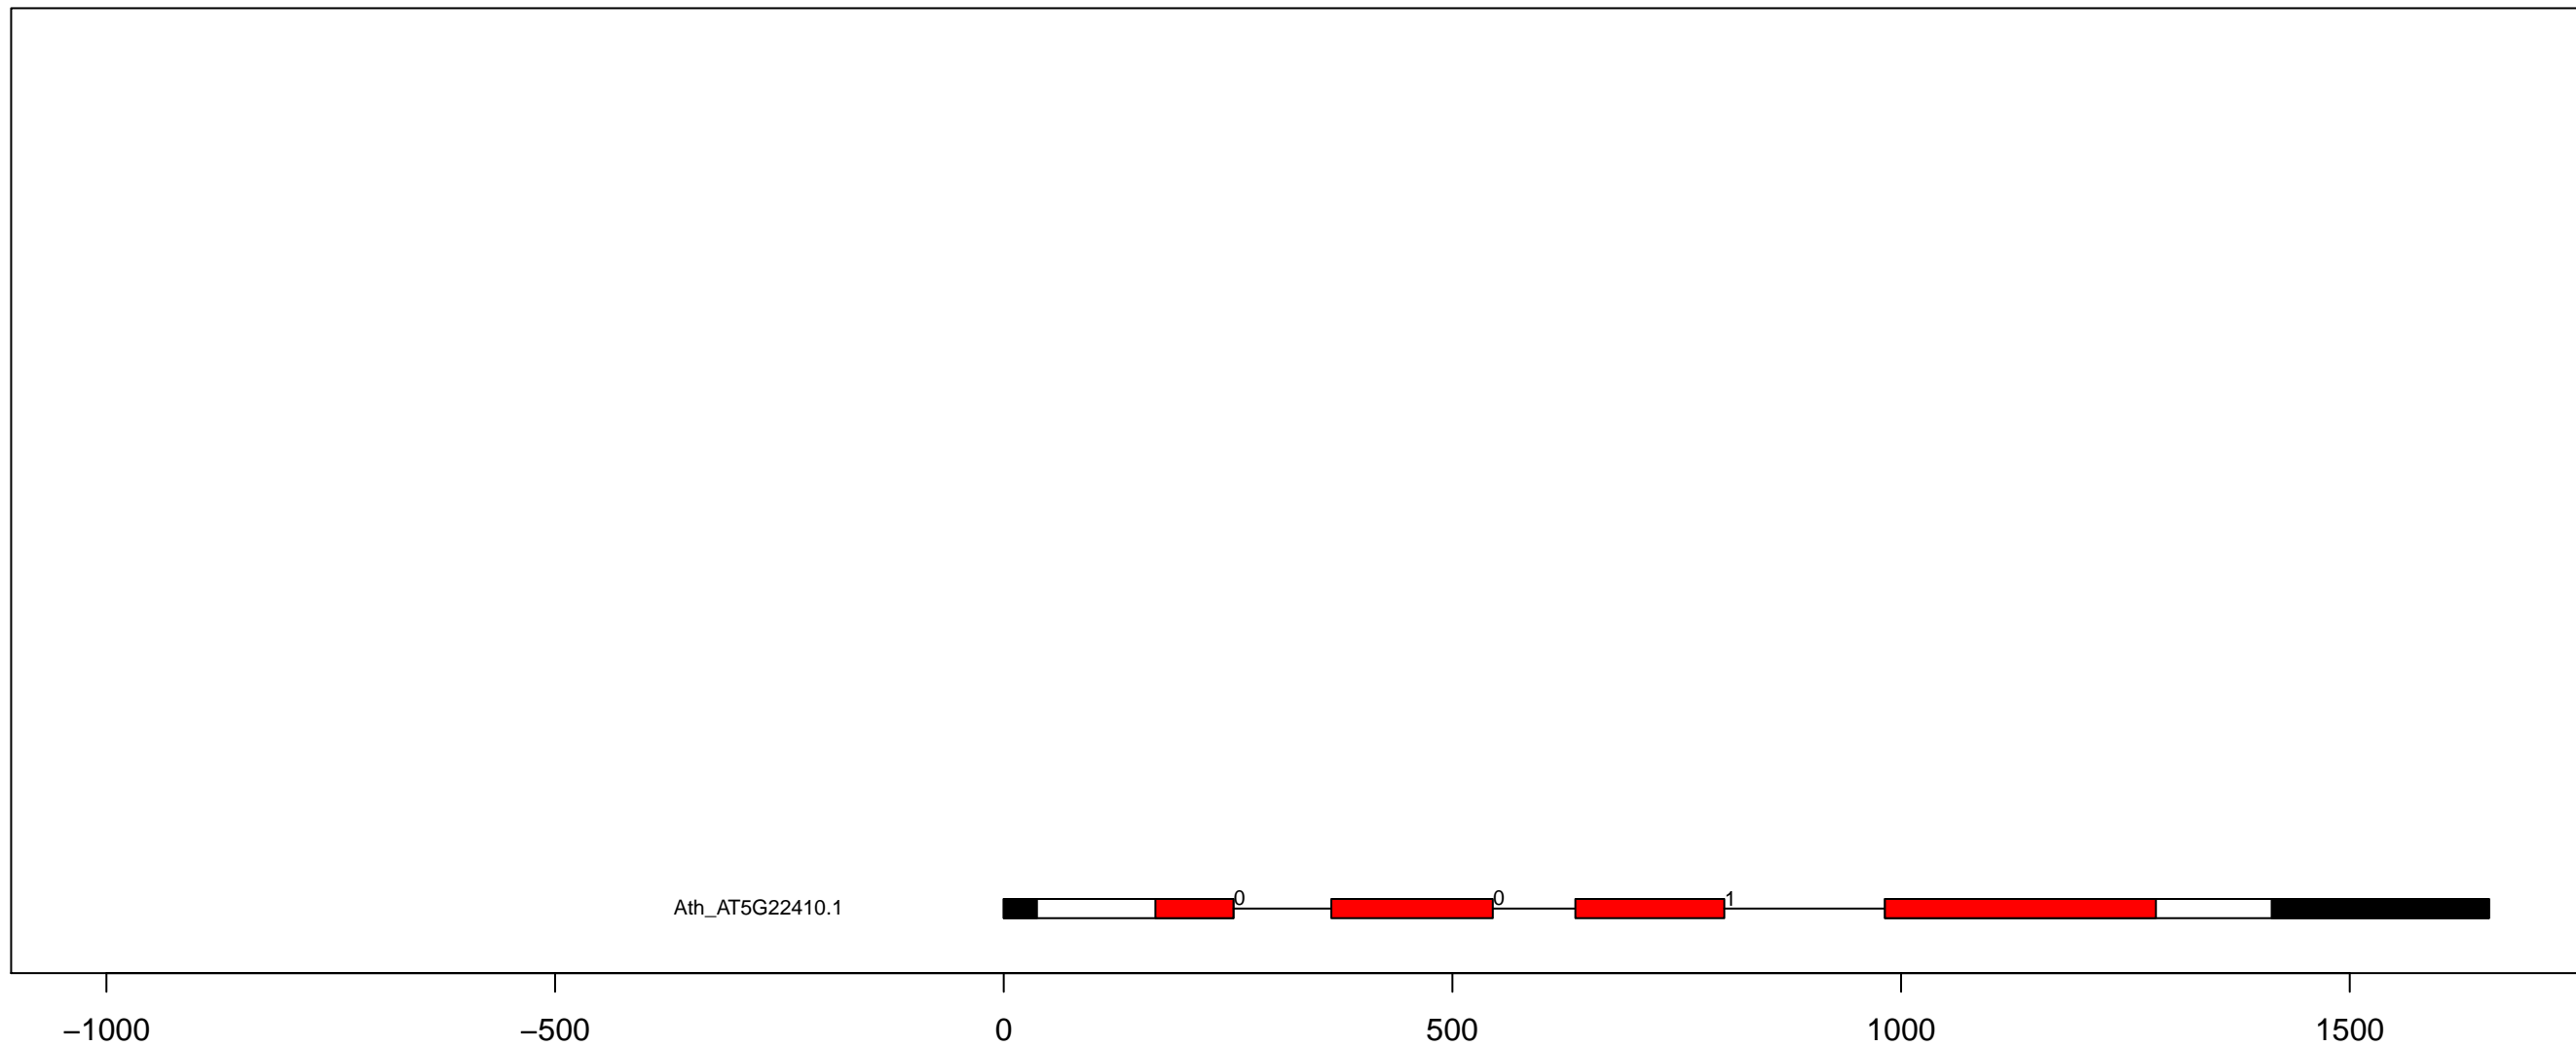

### A.th class III peroxidase XII subfamily exon-intron and prx domain diagram (all)

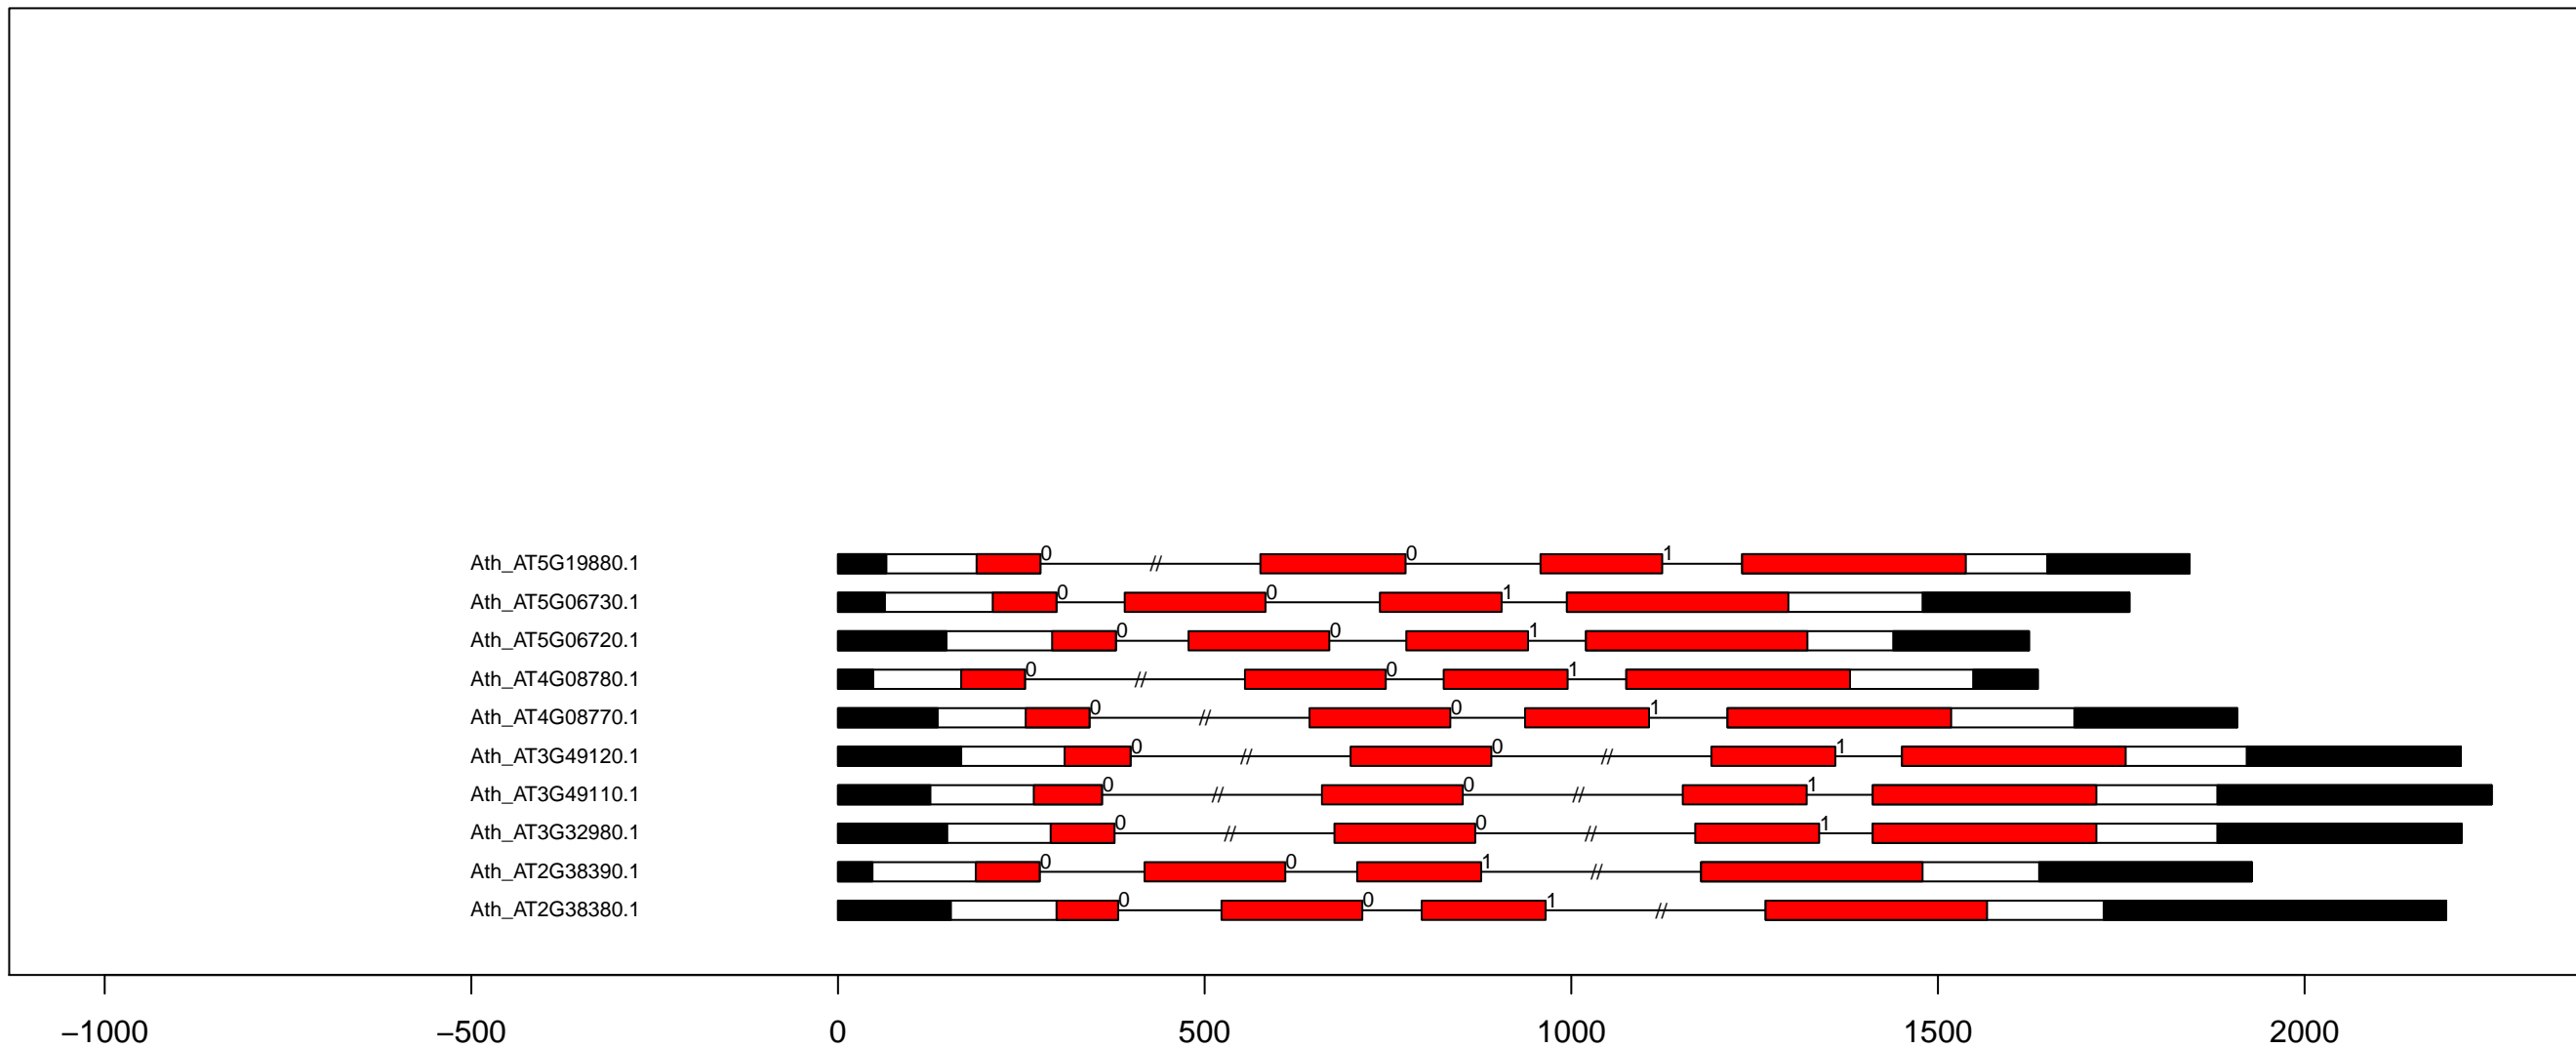

# A.th class III peroxidase XIII subfamily exon-intron and prx domain diagram (all)

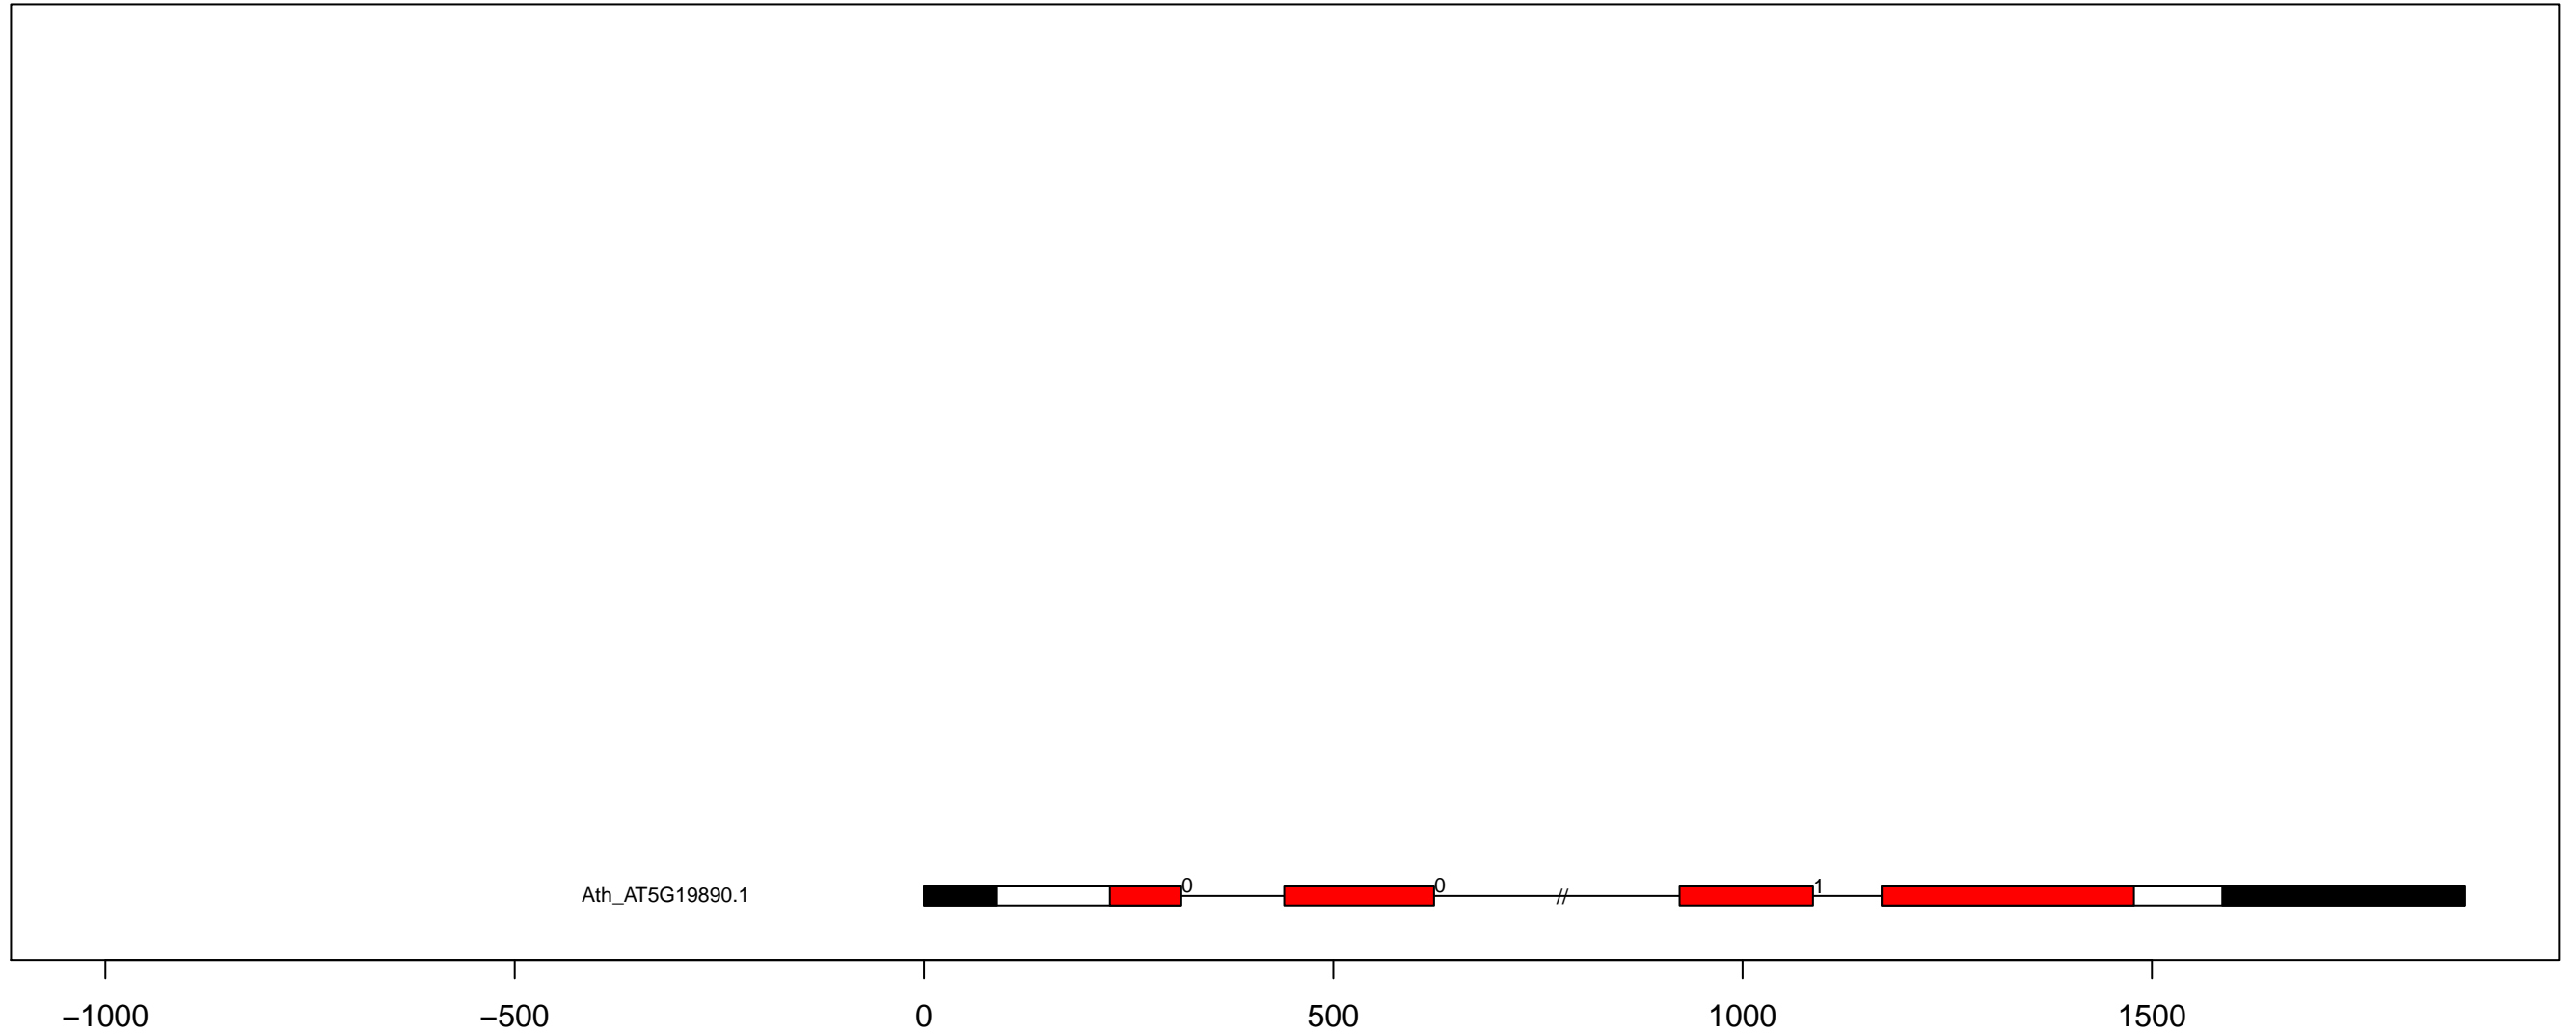



# A.th class III peroxidase XVII subfamily exon-intron and prx domain diagram (all)

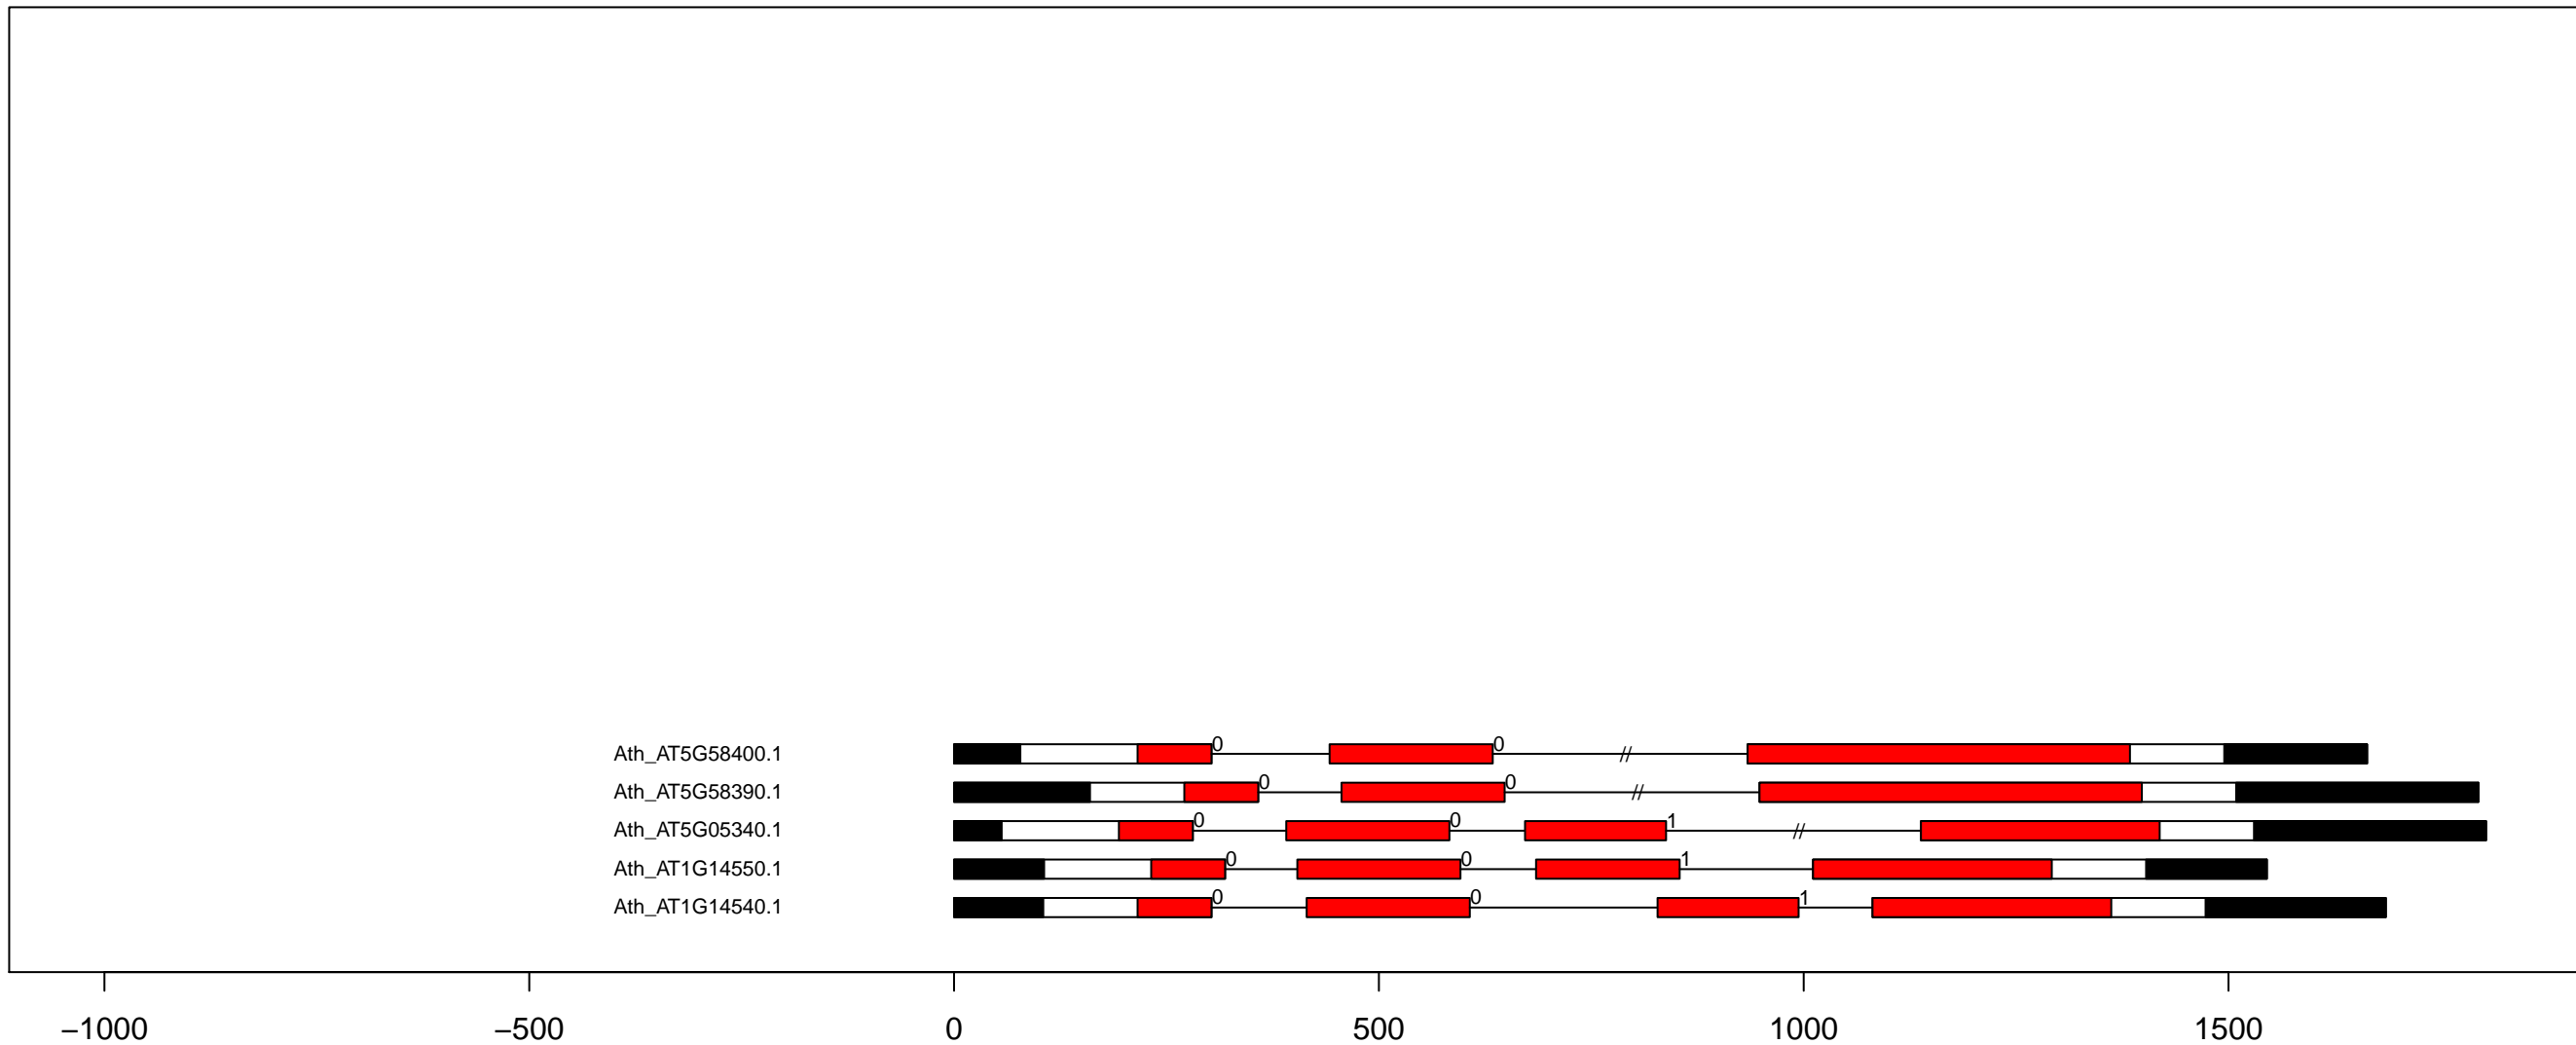

**A.th class III peroxidase XVIII subfamily exon-intron and prx domain diagram (all)**

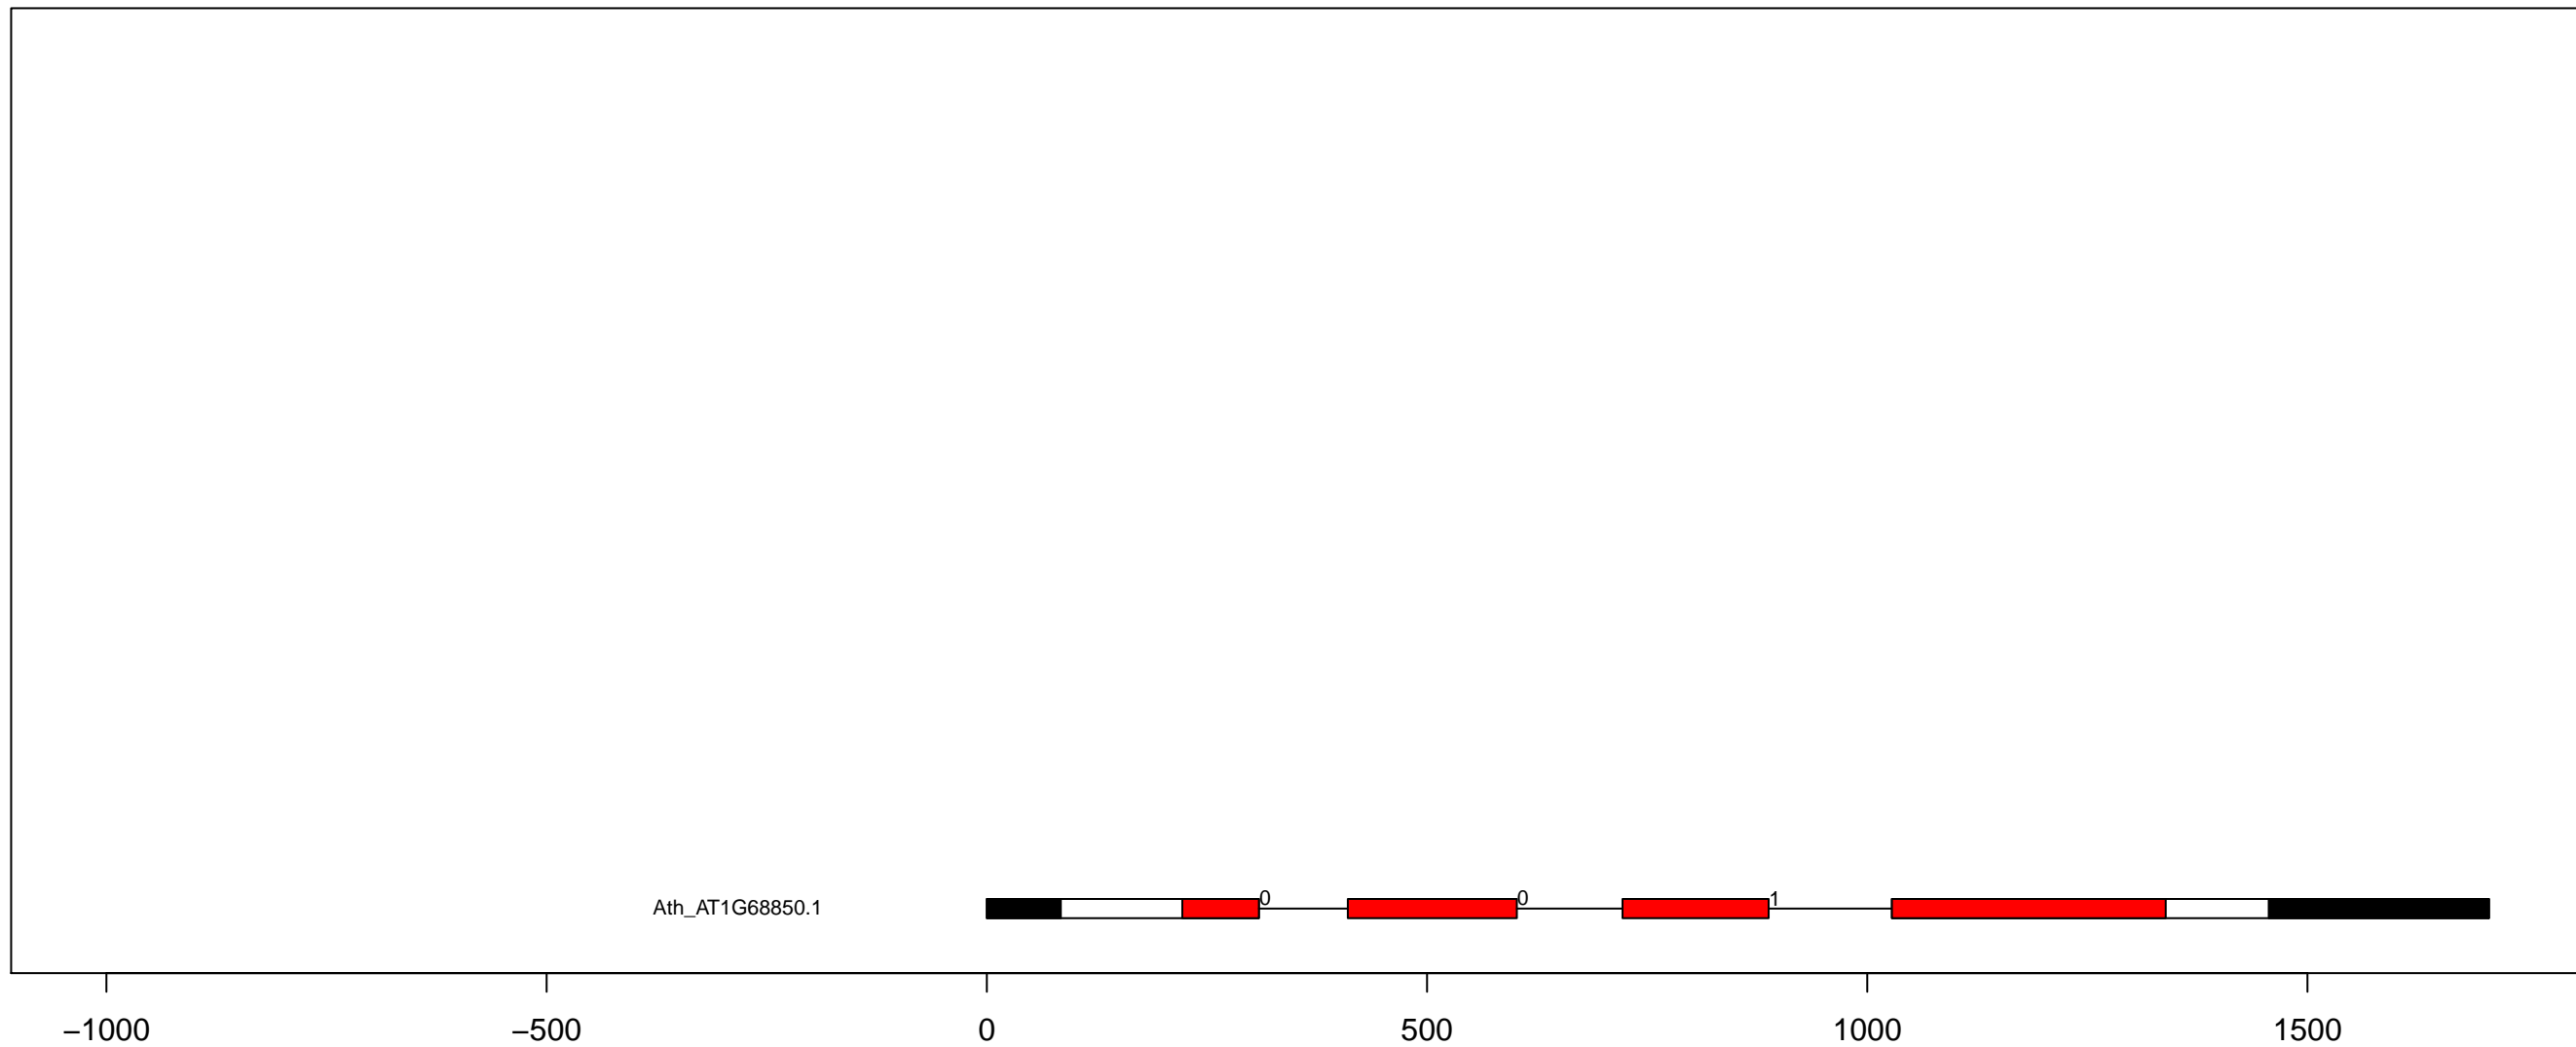

# A.th class III peroxidase unclar\_classifications subfamily exon-intron and prx domain diagram (all)

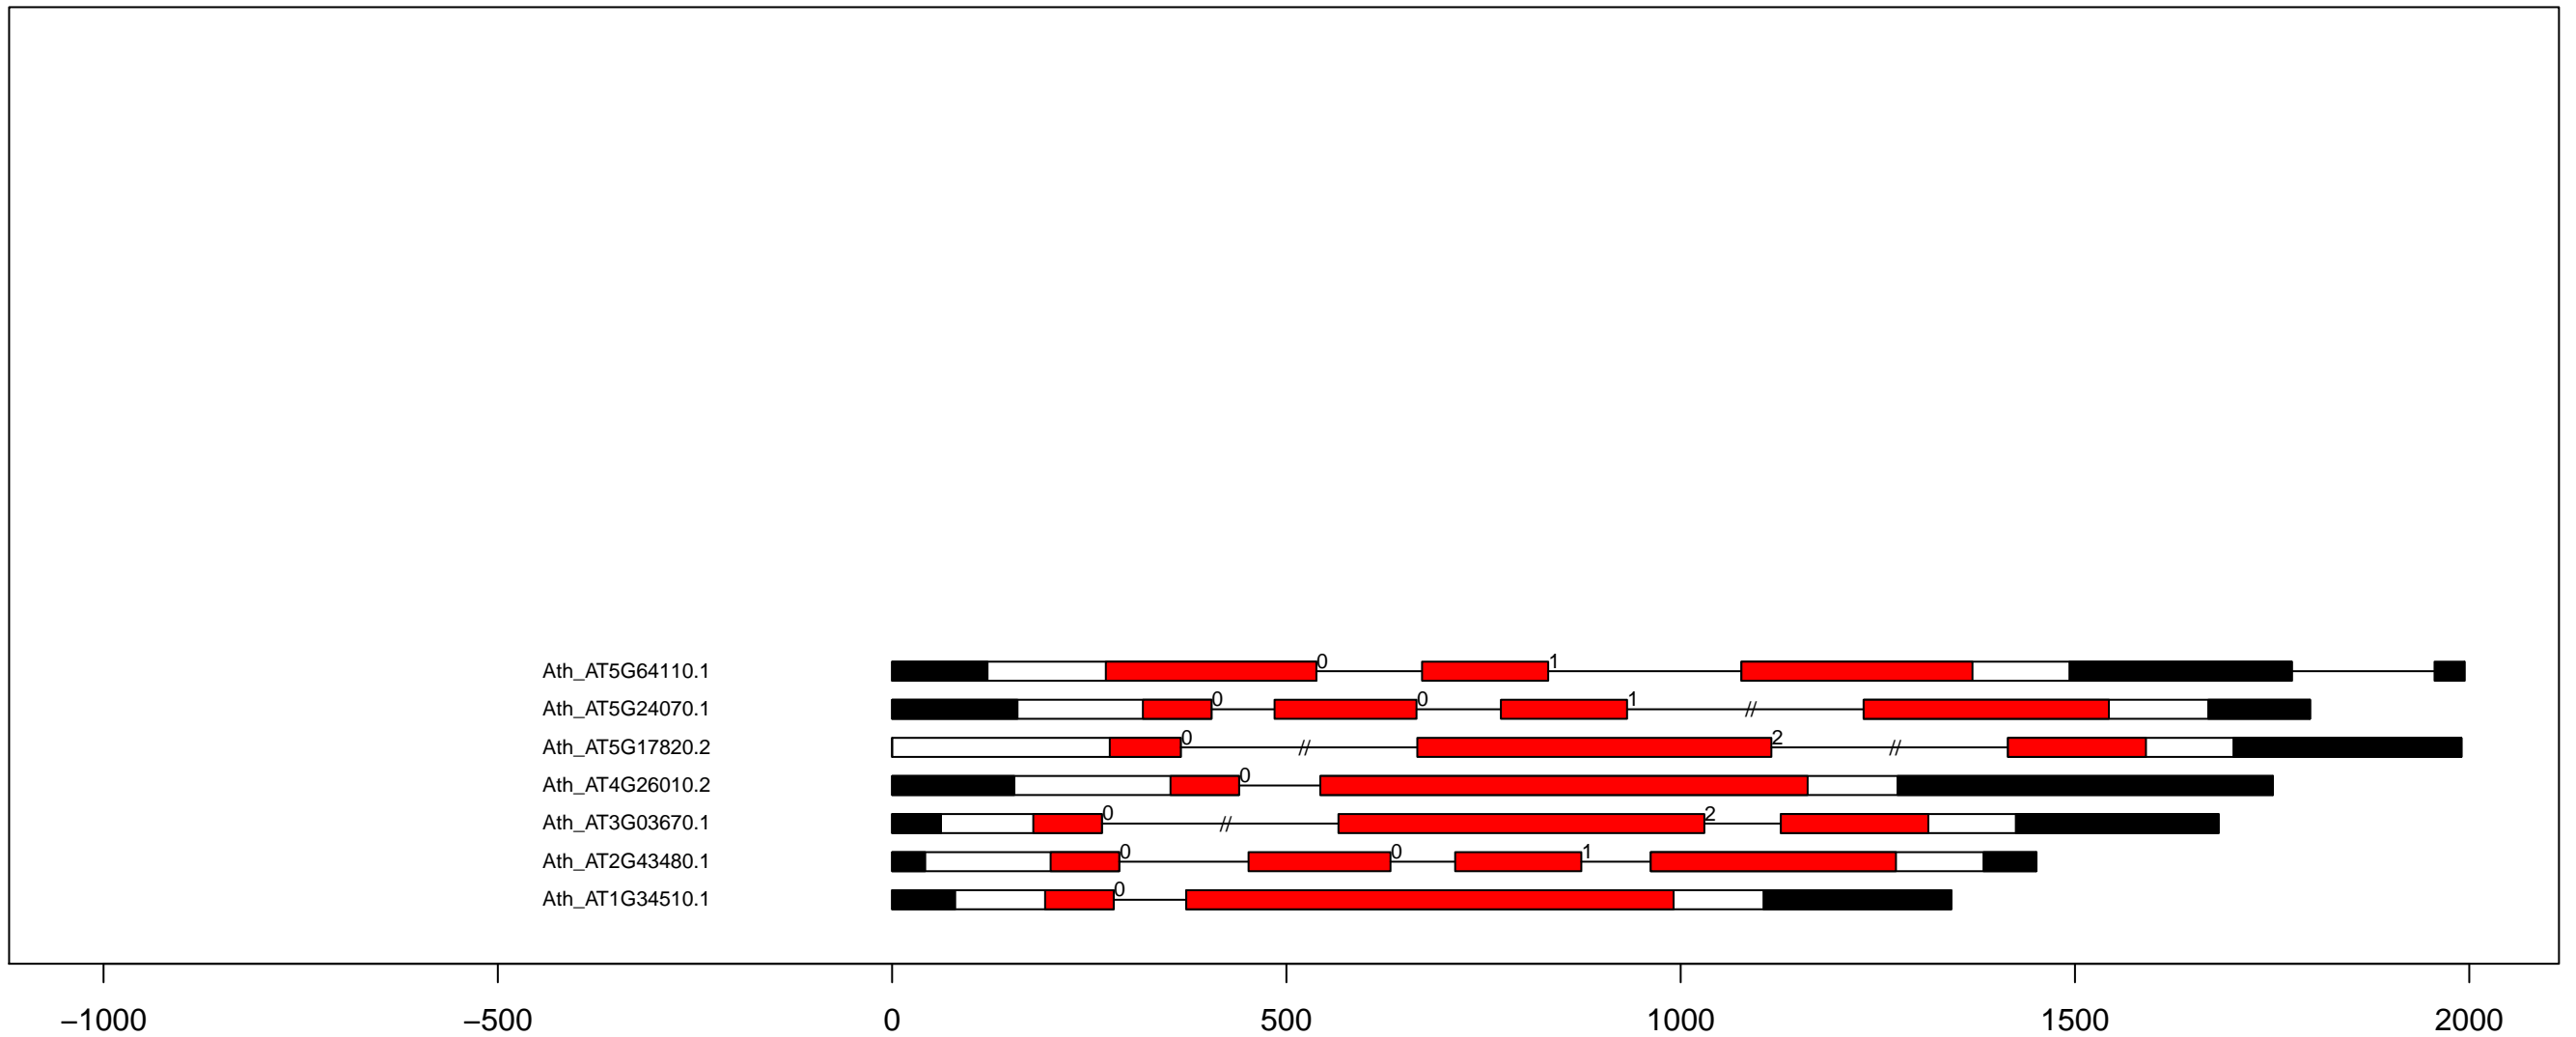

# V.vi class III peroxidase I subfamily exon-intron and prx domain diagram (all)

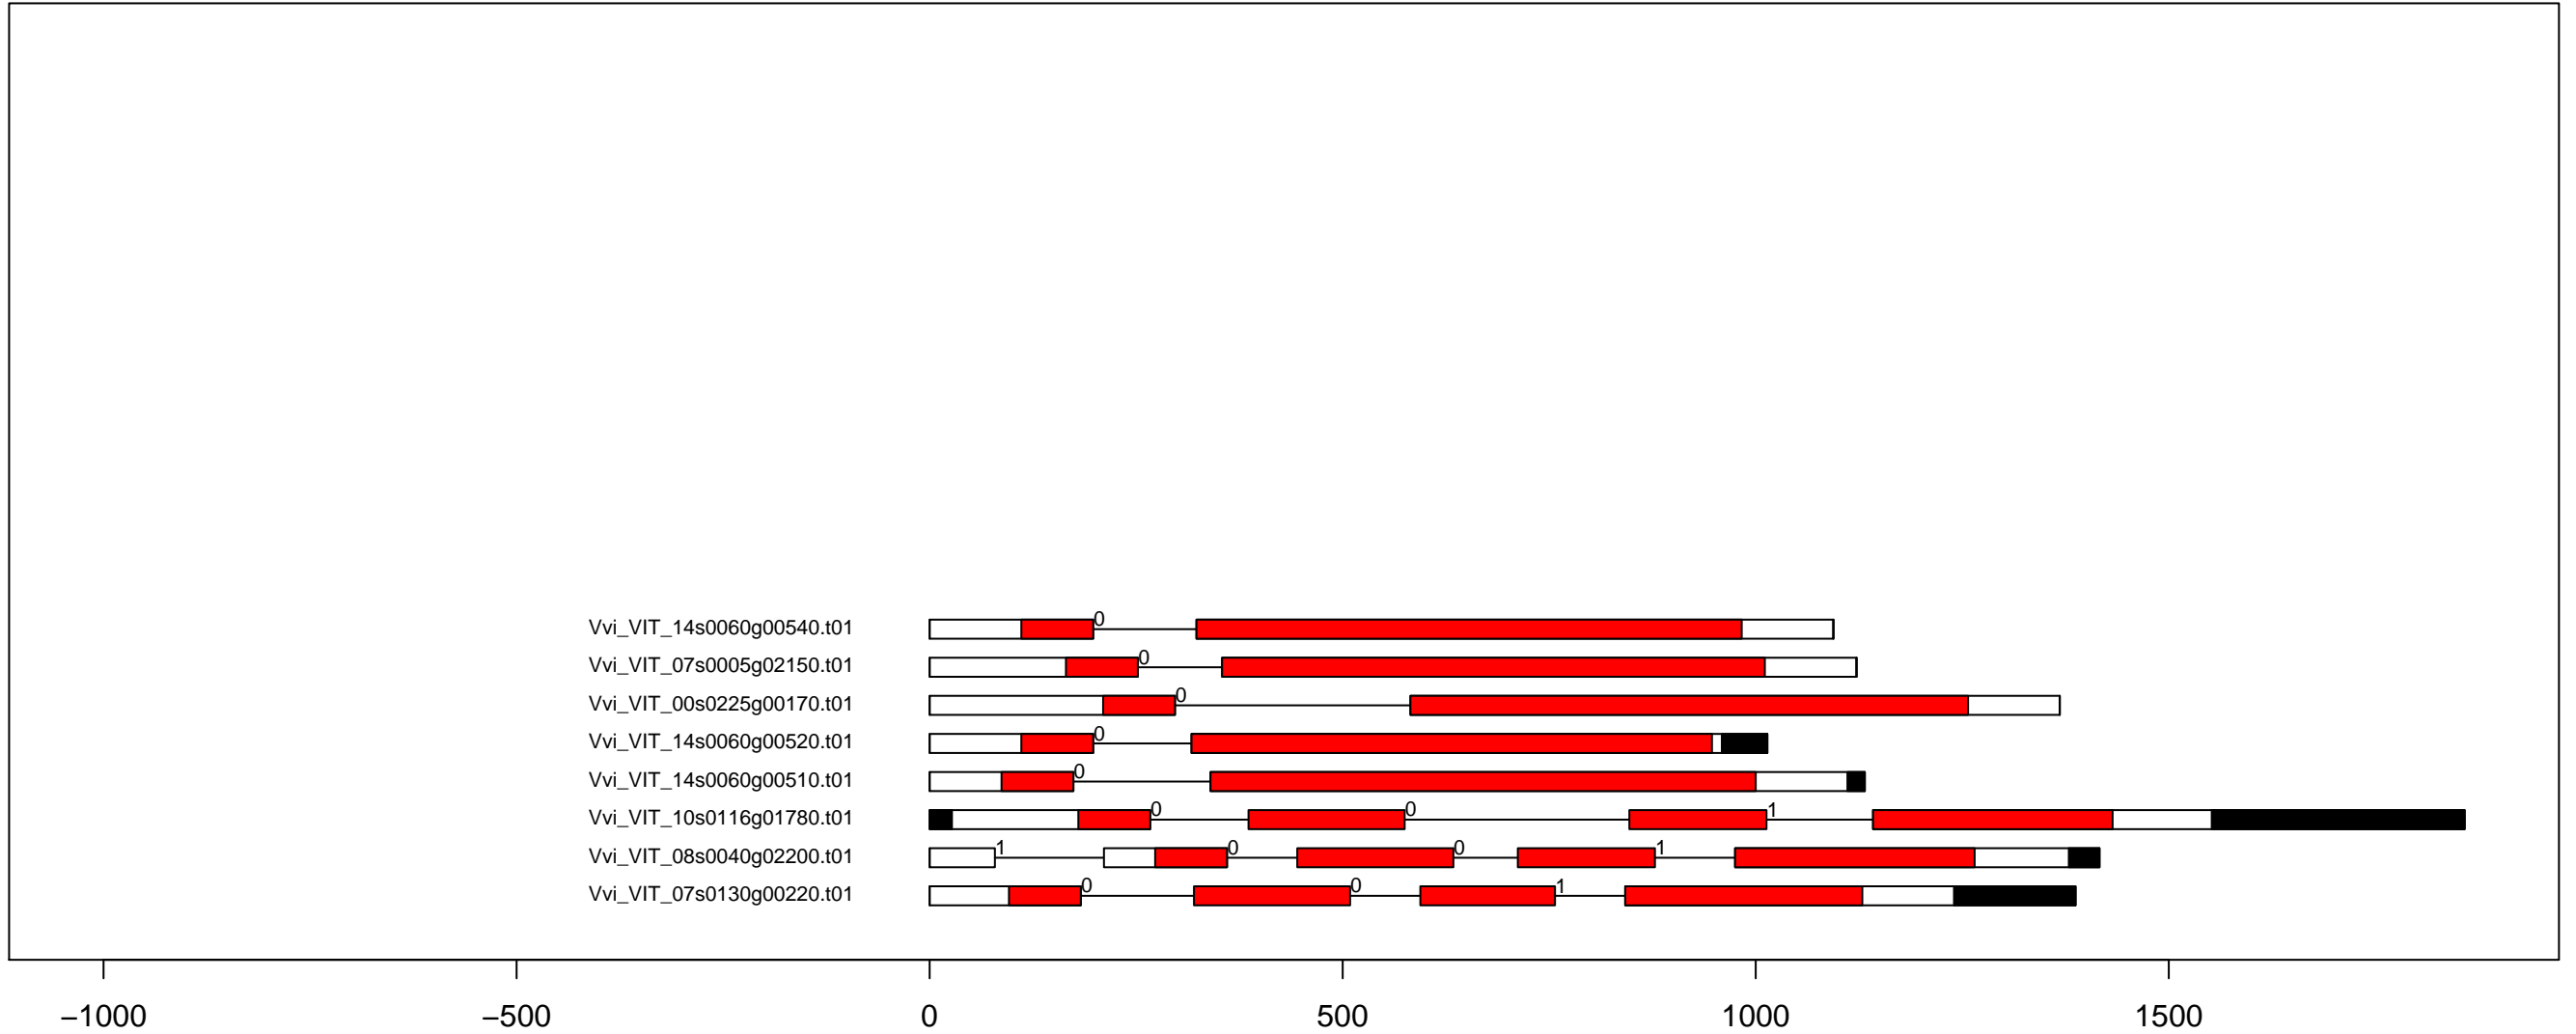



### V.vi class III peroxidase V subfamily exon-intron and prx domain diagram (all)

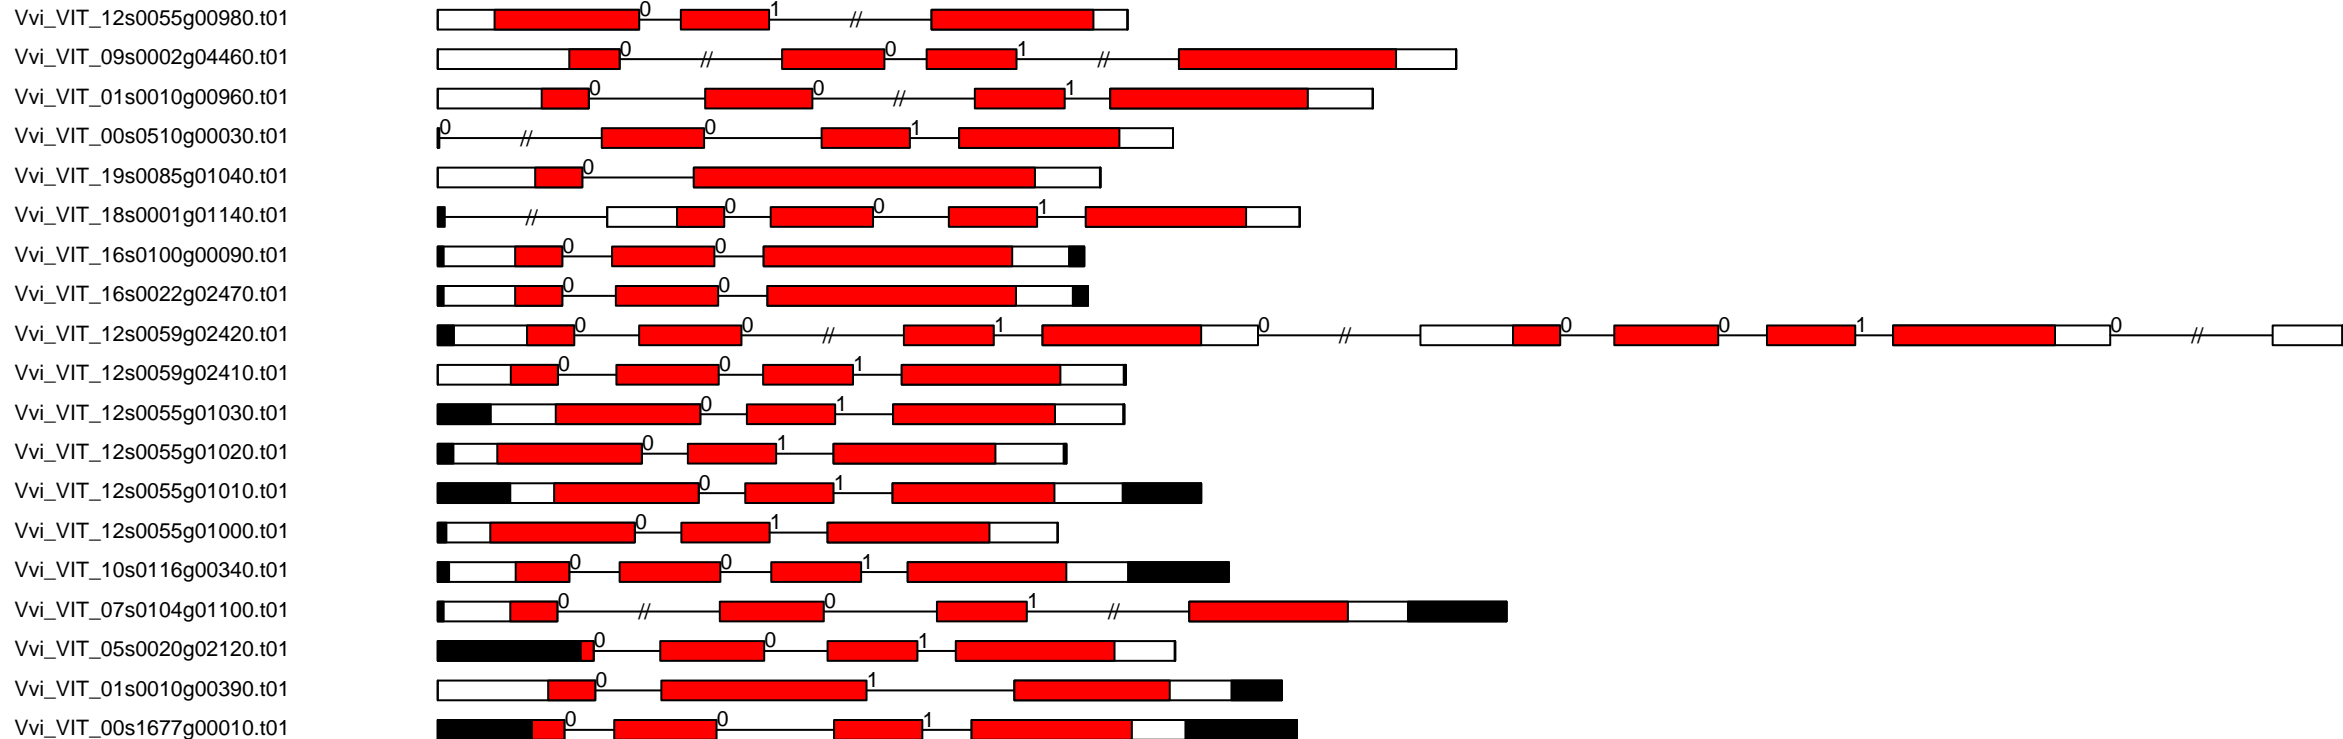

-1000

0

1000

2000

3000

# V.vi class III peroxidase VI subfamily exon-intron and prx domain diagram (all)

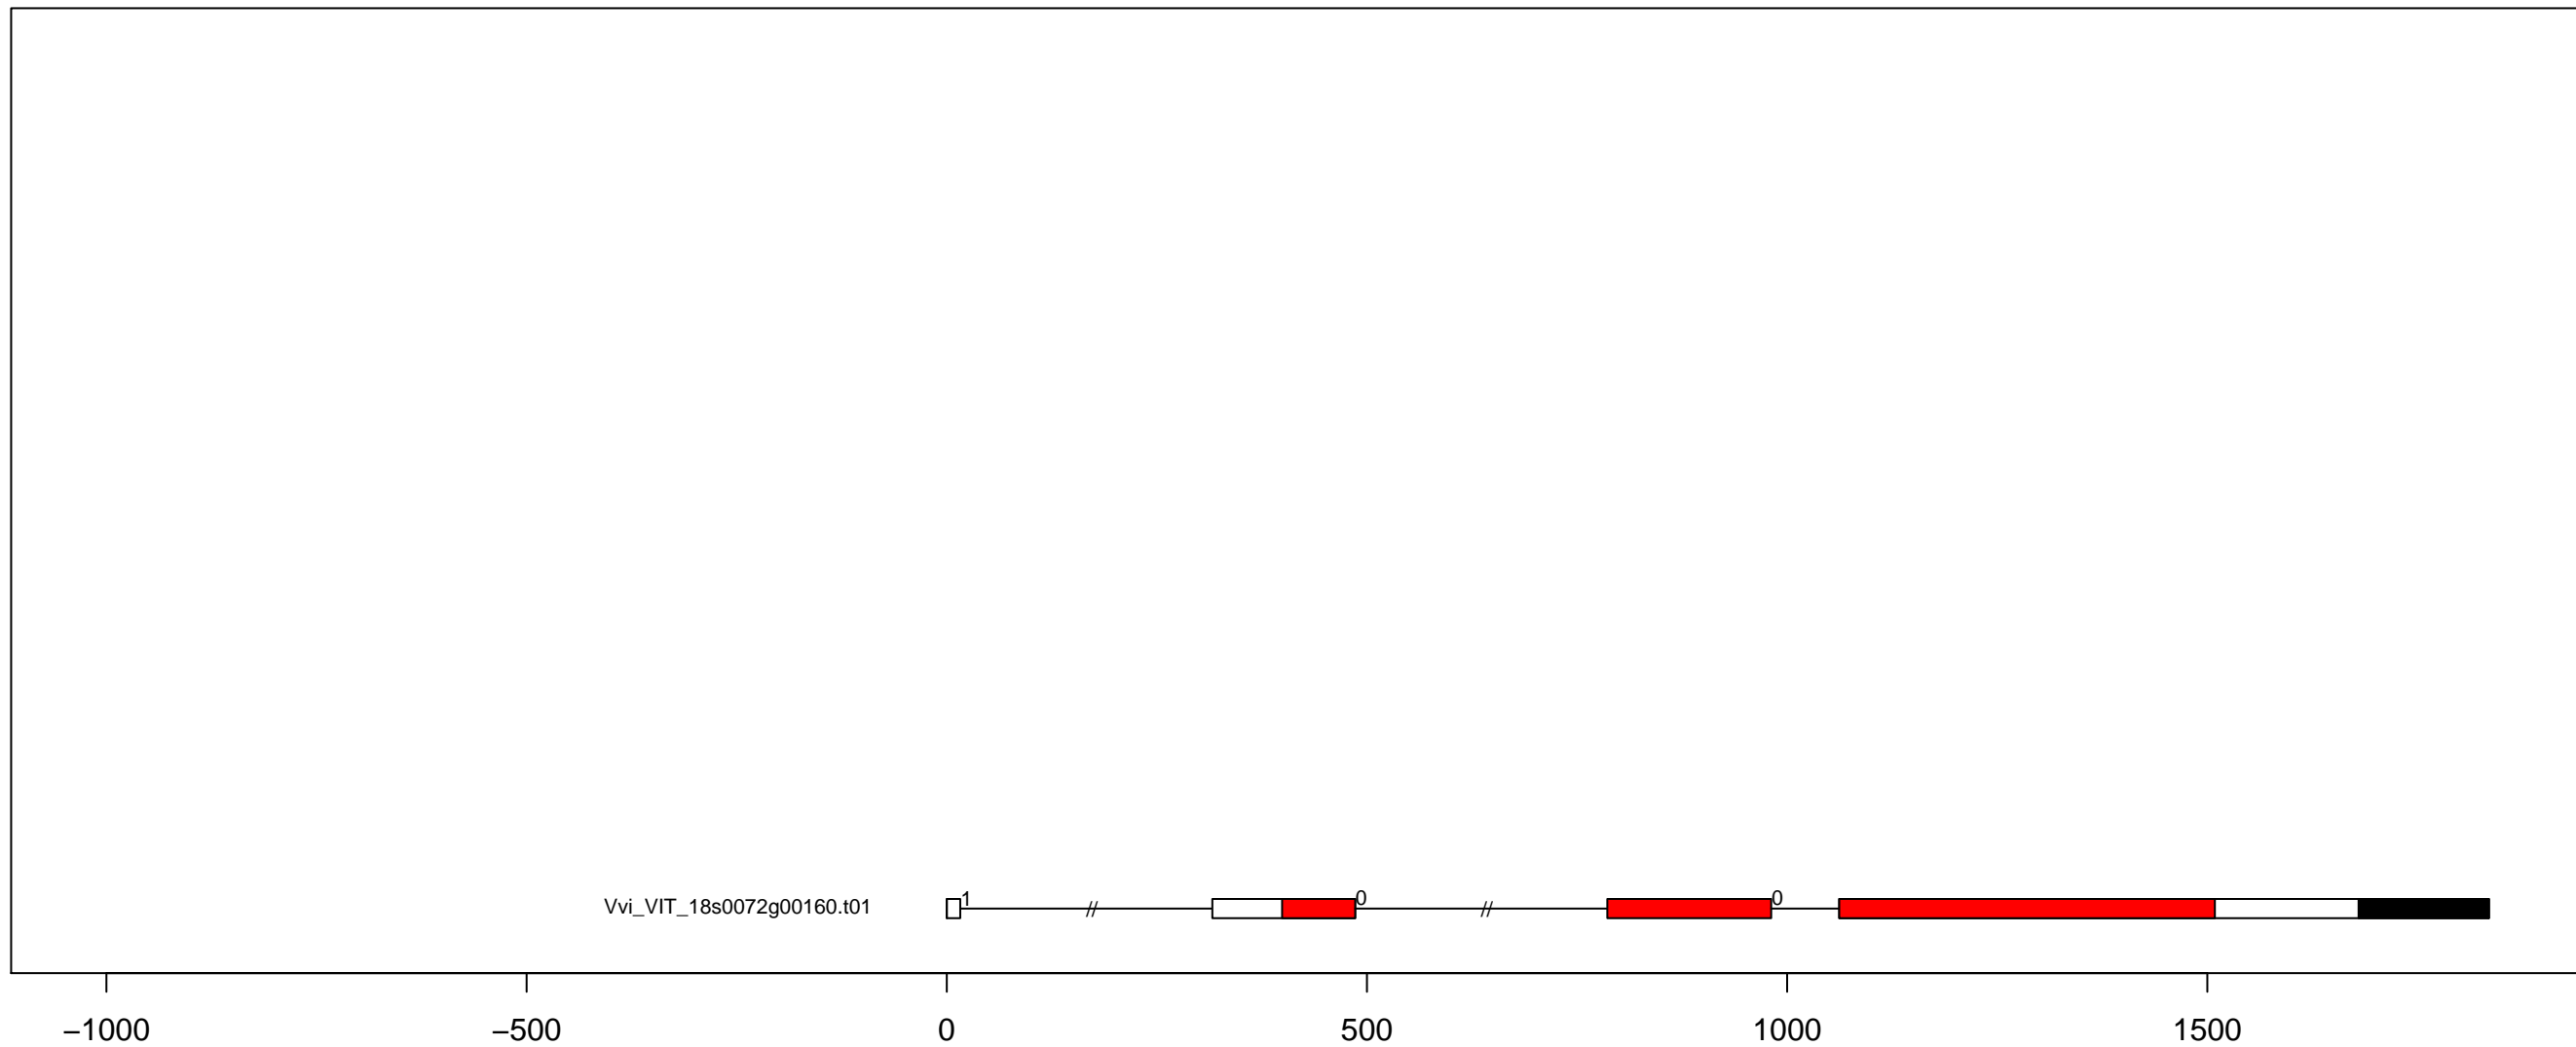

# V.vi class III peroxidase VII subfamily exon-intron and prx domain diagram (all)

Vvi\_VIT\_04s0023g03750.t01  
Vvi\_VIT\_18s0001g06370.t01  
Vvi\_VIT\_18s0001g02470.t01  
Vvi\_VIT\_08s0040g03150.t01  
Vvi\_VIT\_06s0004g03550.t01  
Vvi\_VIT\_03s0038g02320.t01

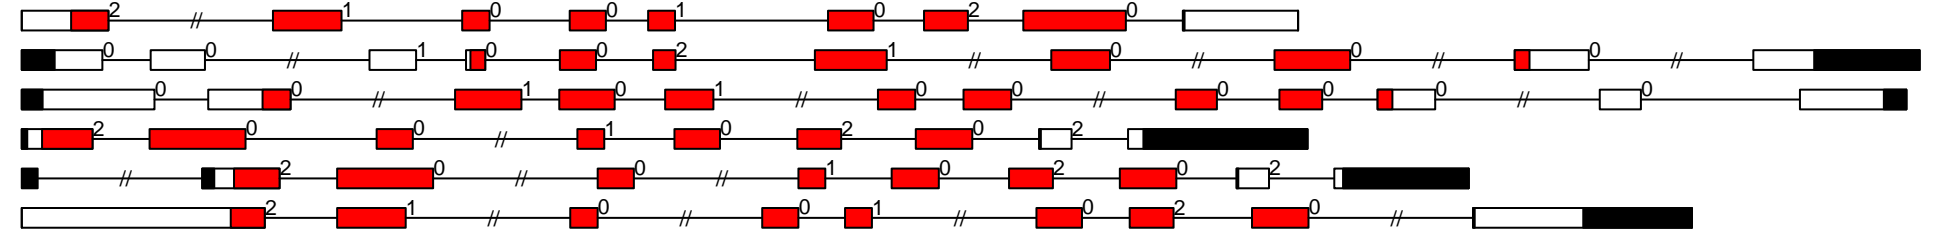

-1000

0

1000

2000

3000

### V.vi class III peroxidase IX subfamily exon-intron and prx domain diagram (all)

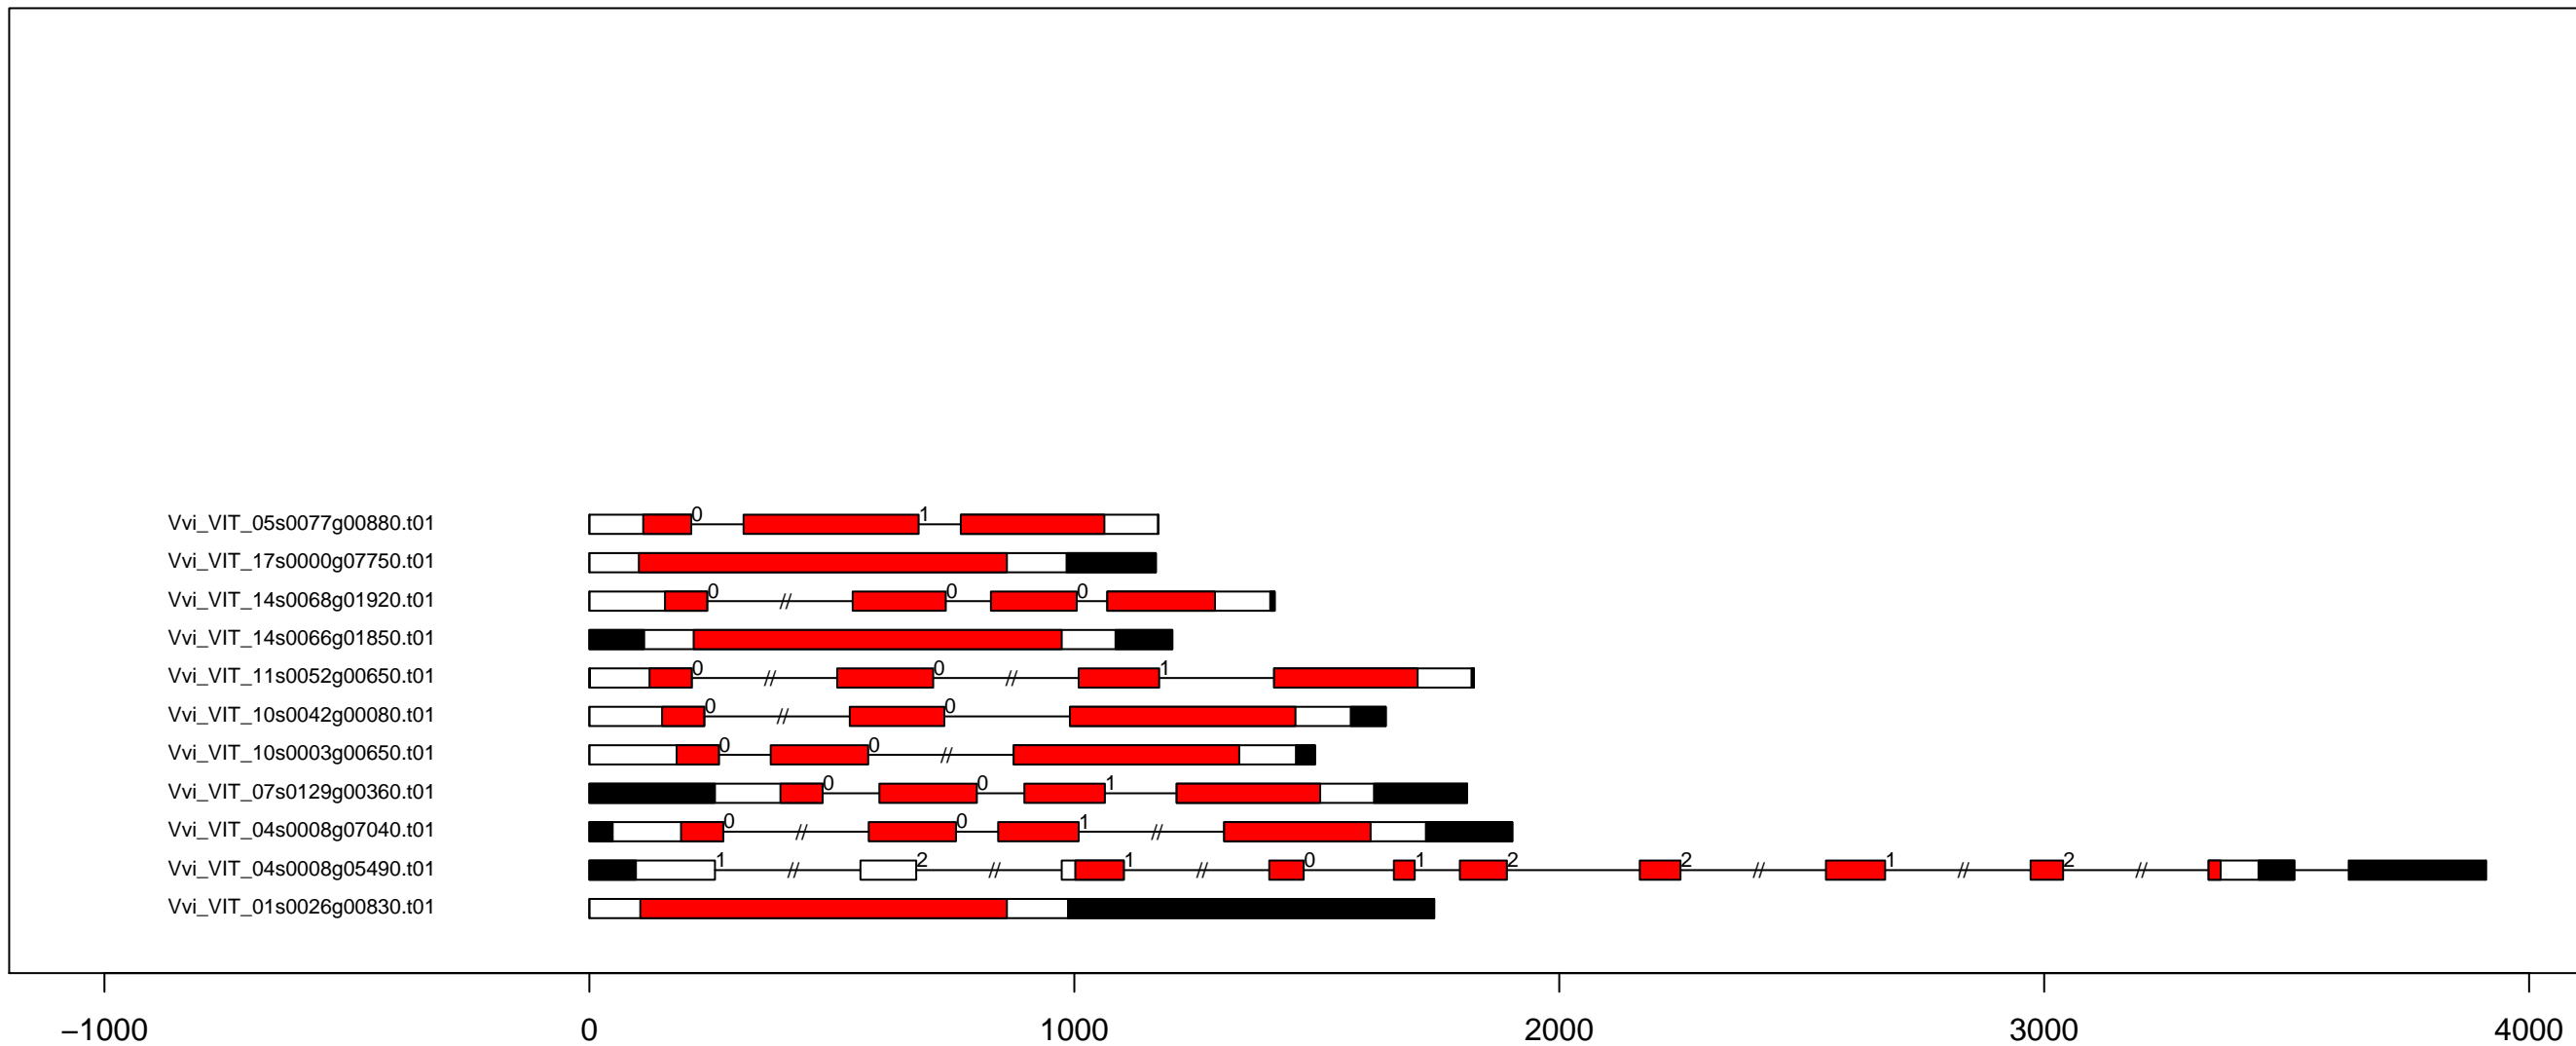

V.vi class III peroxidase X subfamily exon-intron and prx domain diagram (all)

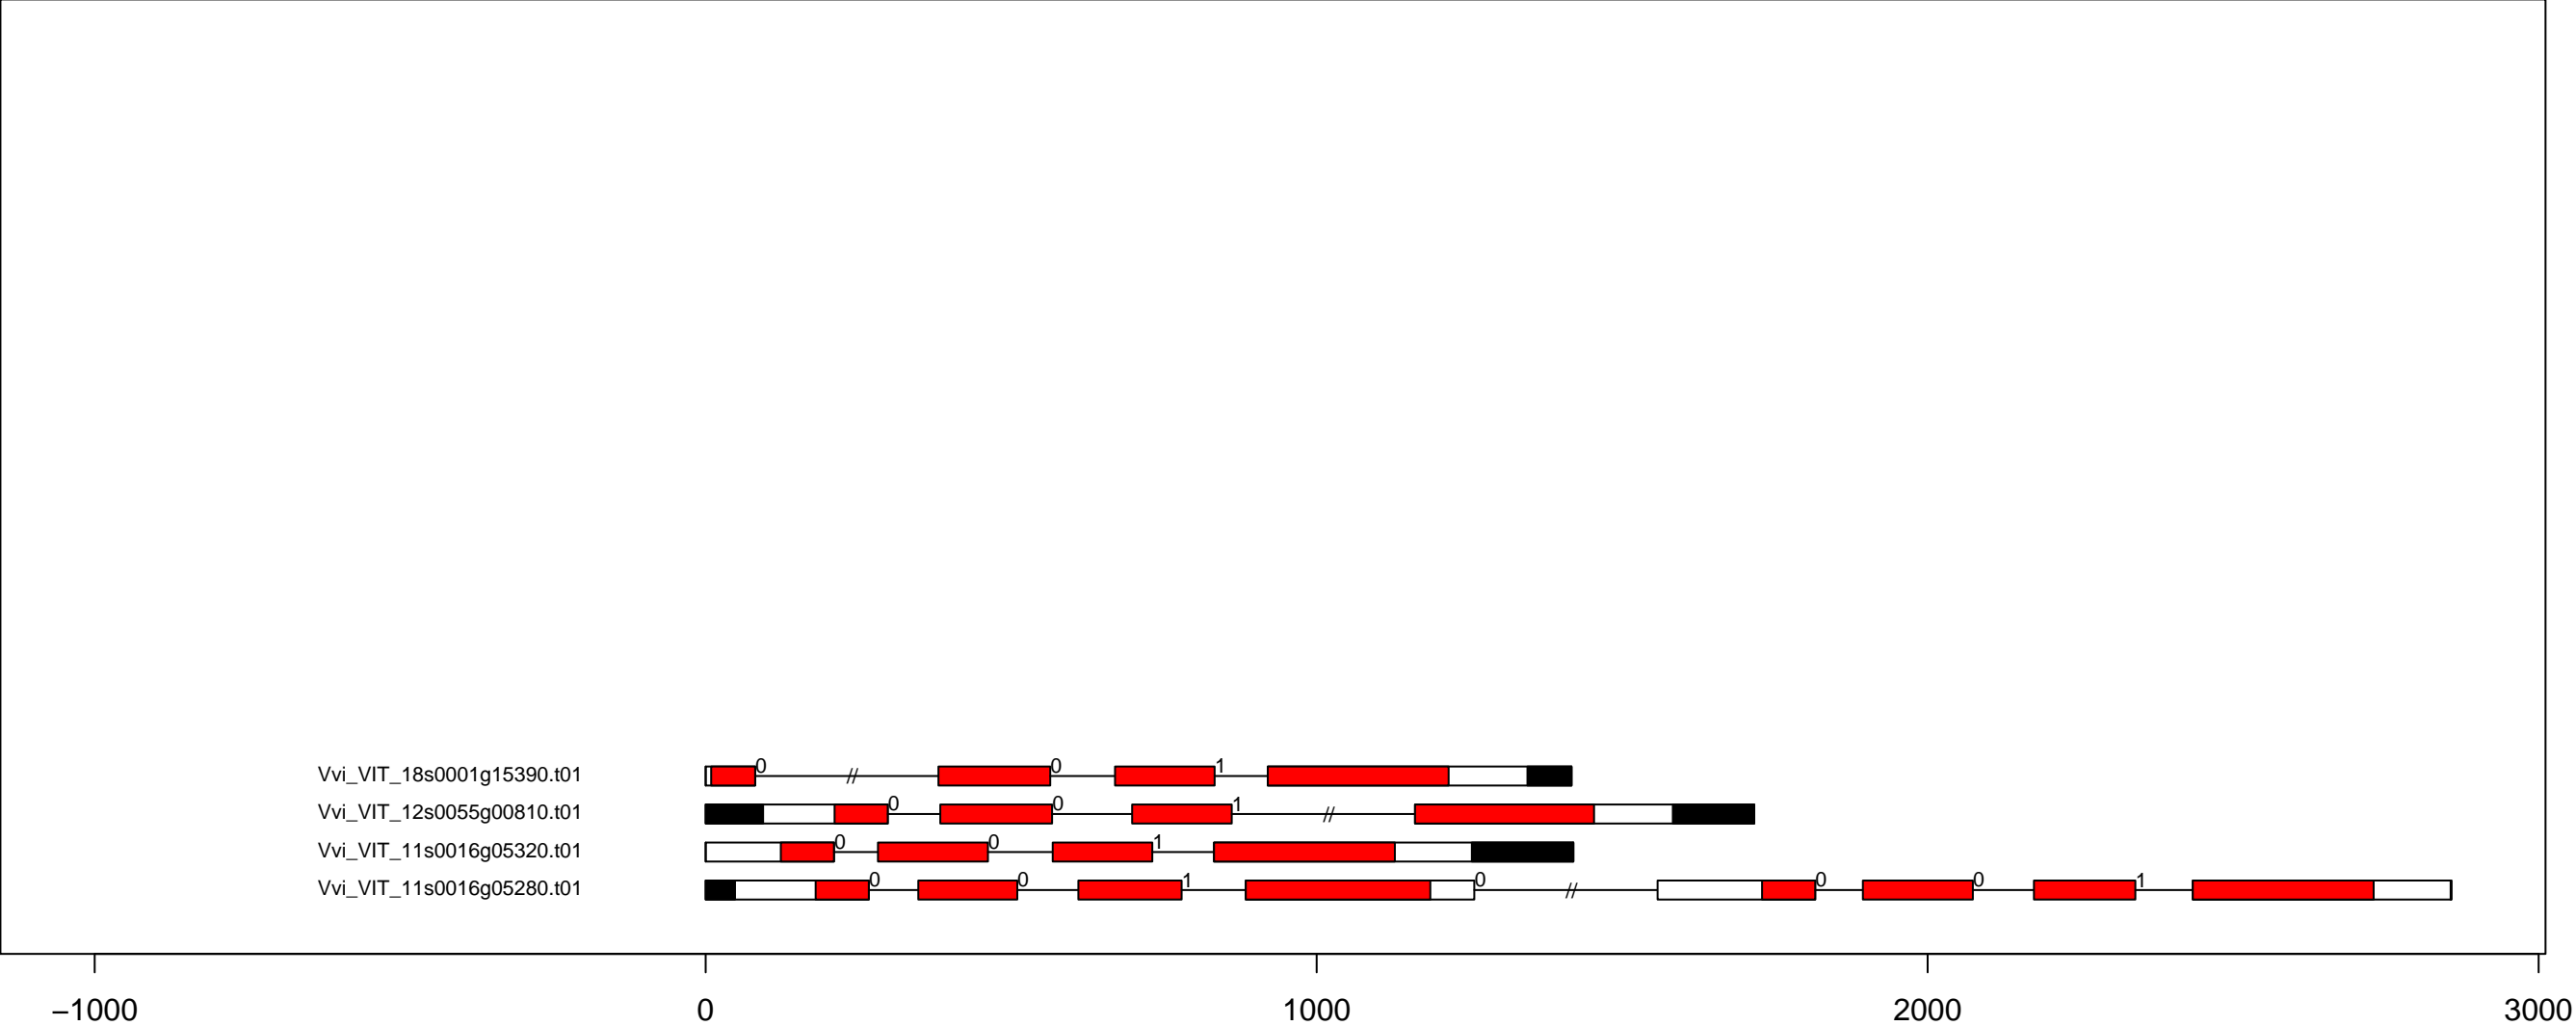

# V.vi class III peroxidase XI subfamily exon-intron and prx domain diagram (all)

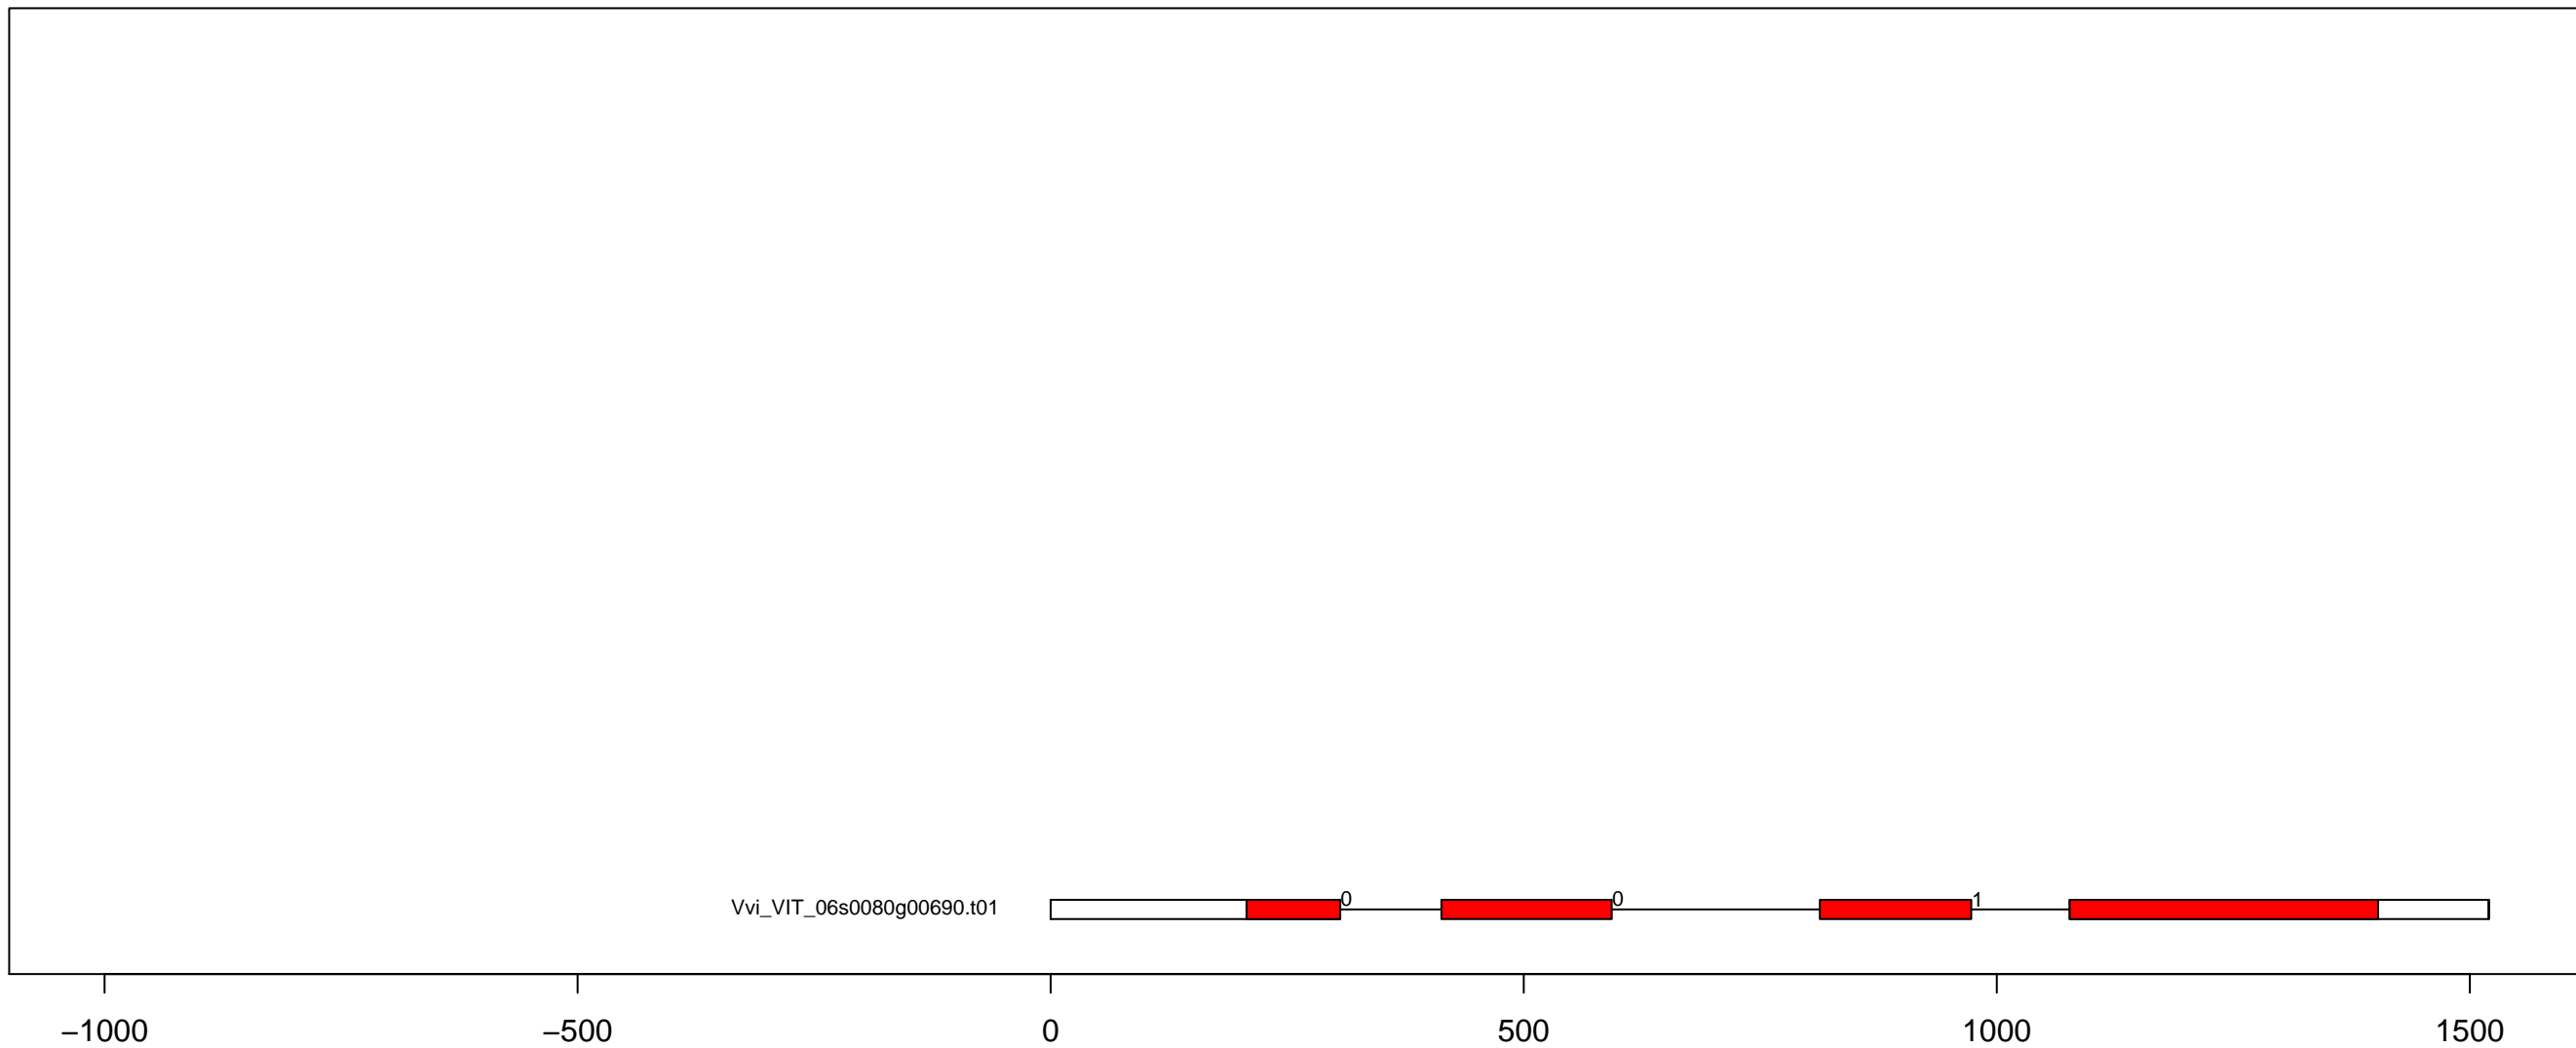

# V.vi class III peroxidase XII subfamily exon-intron and prx domain diagram (all)

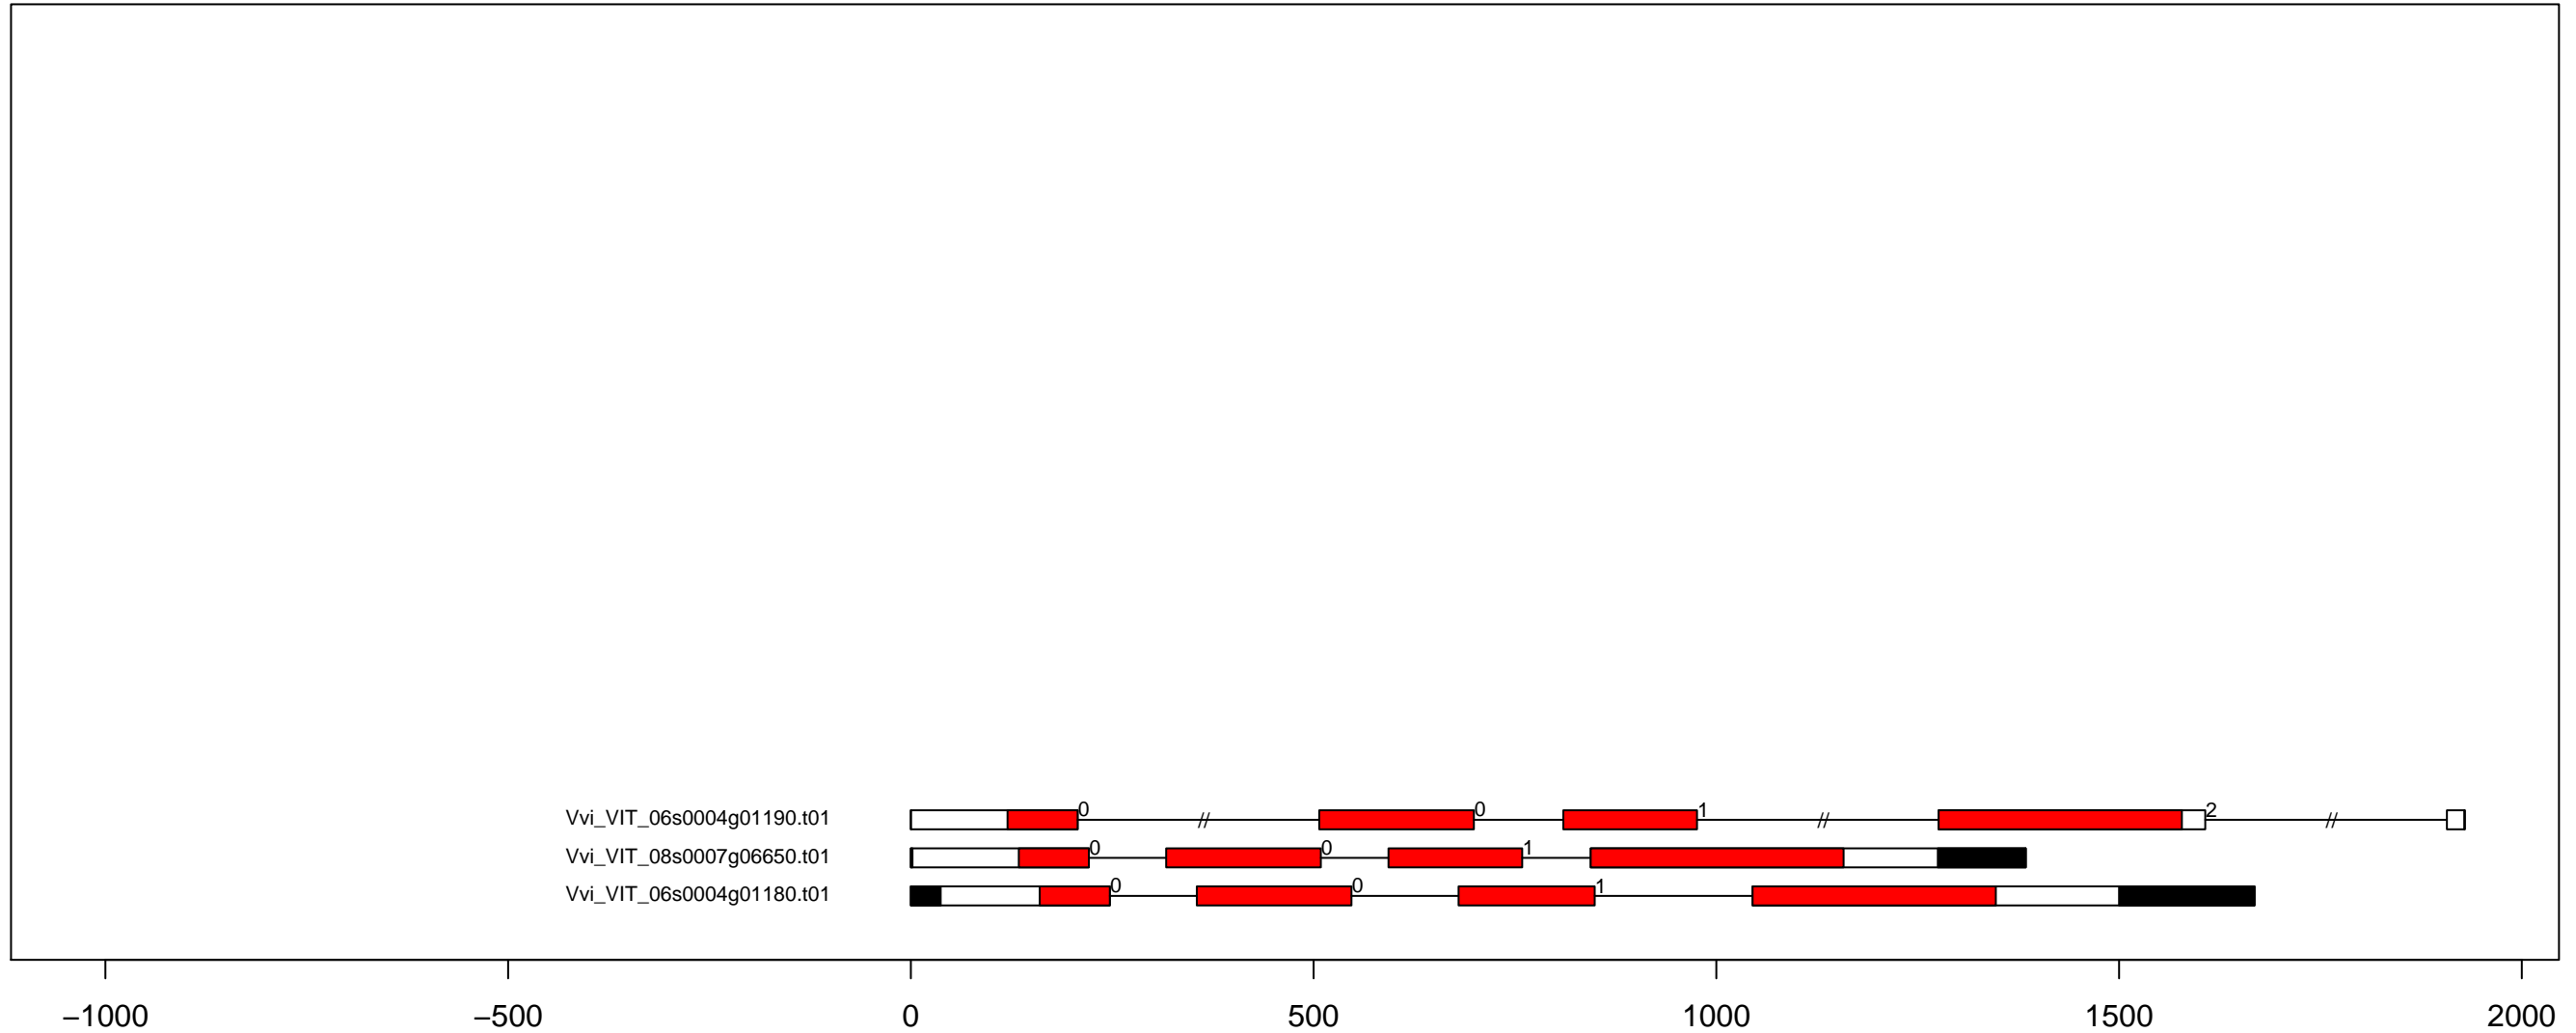

# V.vi class III peroxidase XIII subfamily exon-intron and prx domain diagram (all)

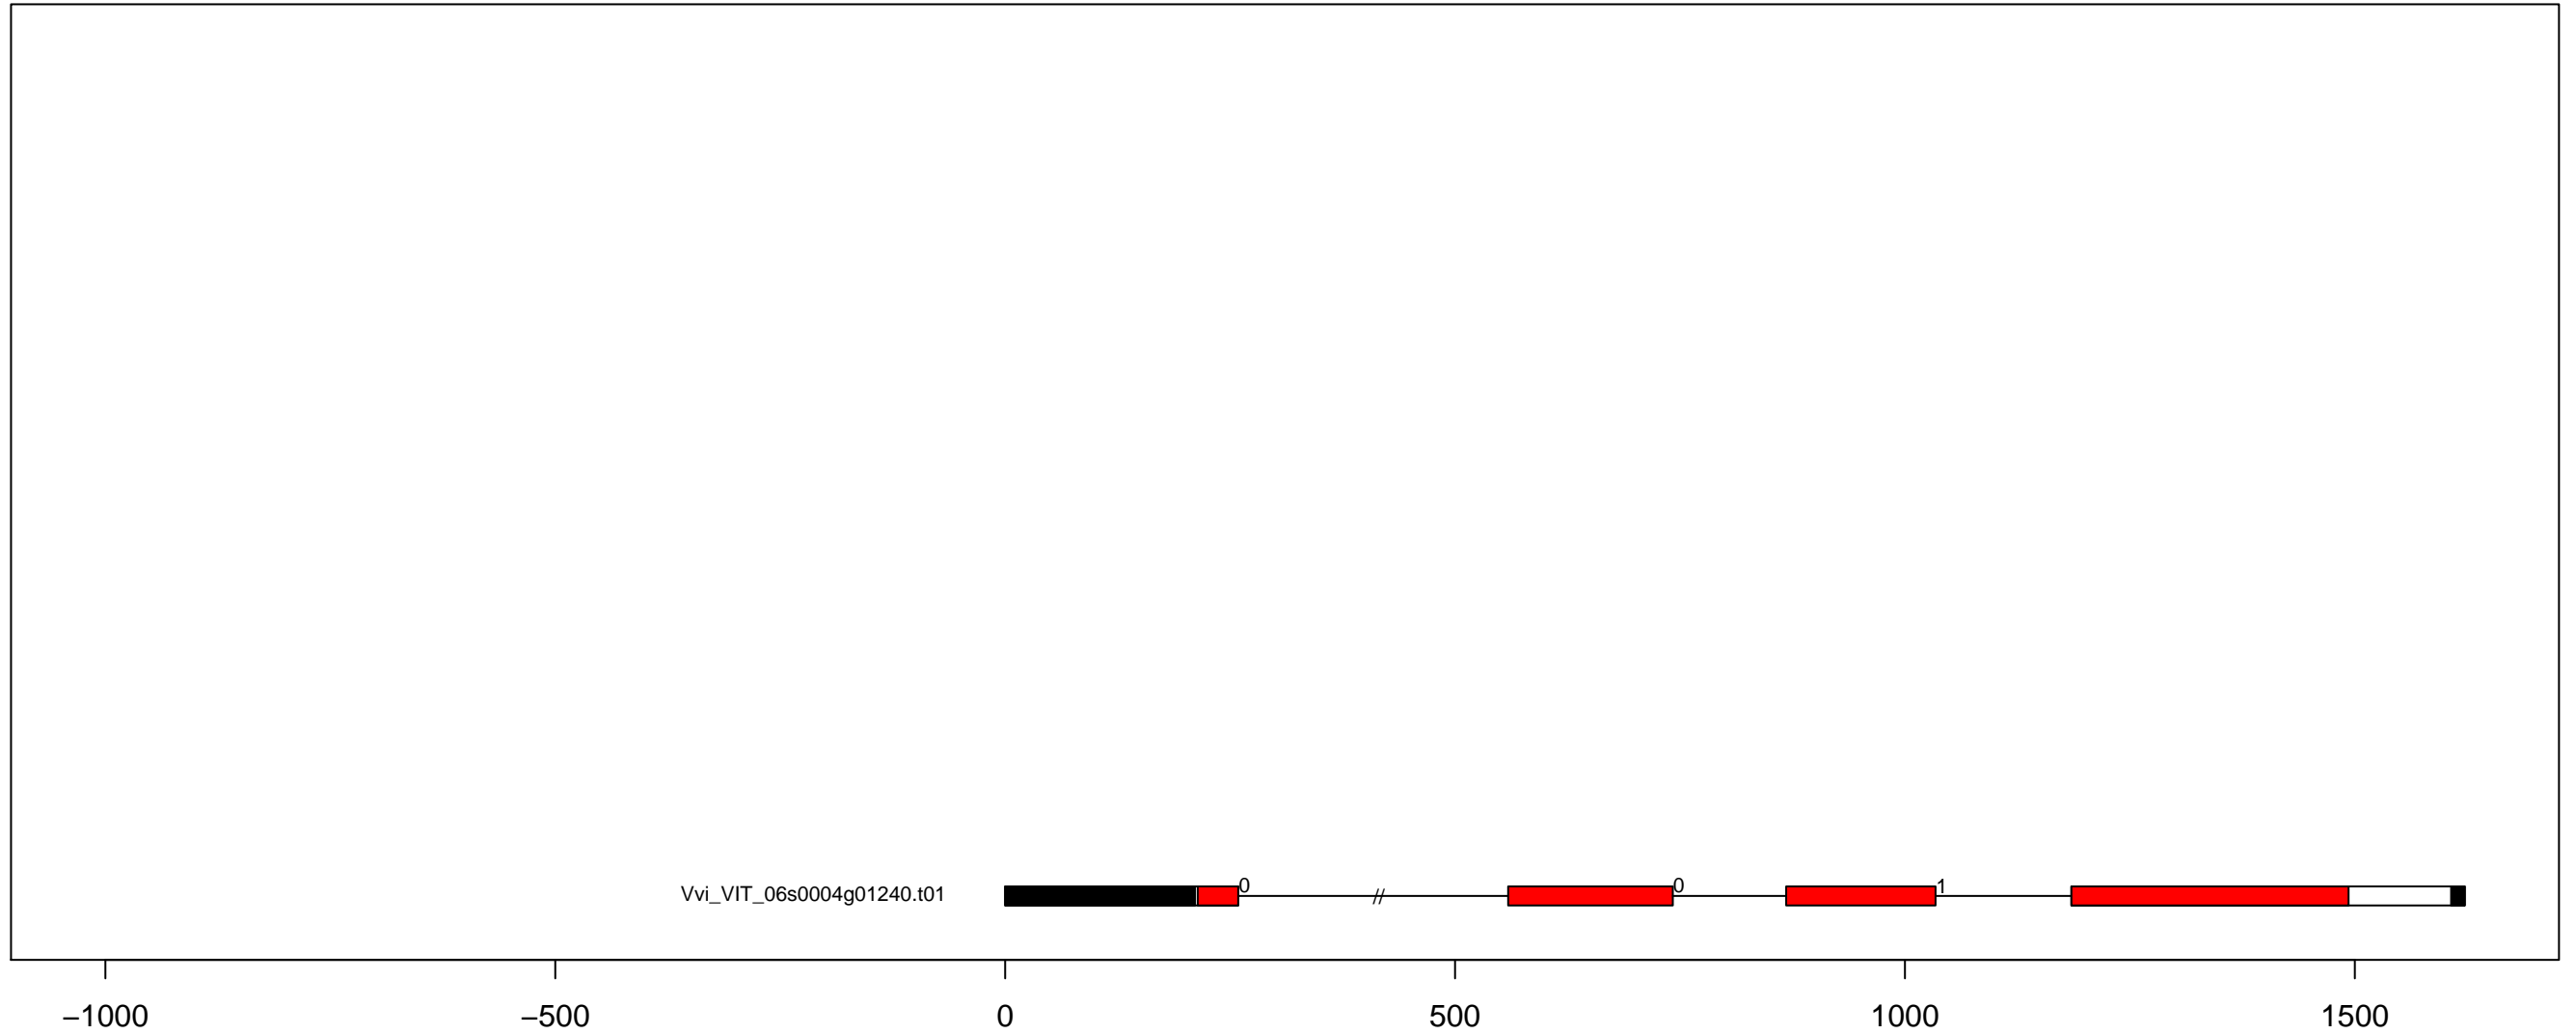



### V.vi class III peroxidase XIV subfamily exon-intron and prx domain diagram (all)

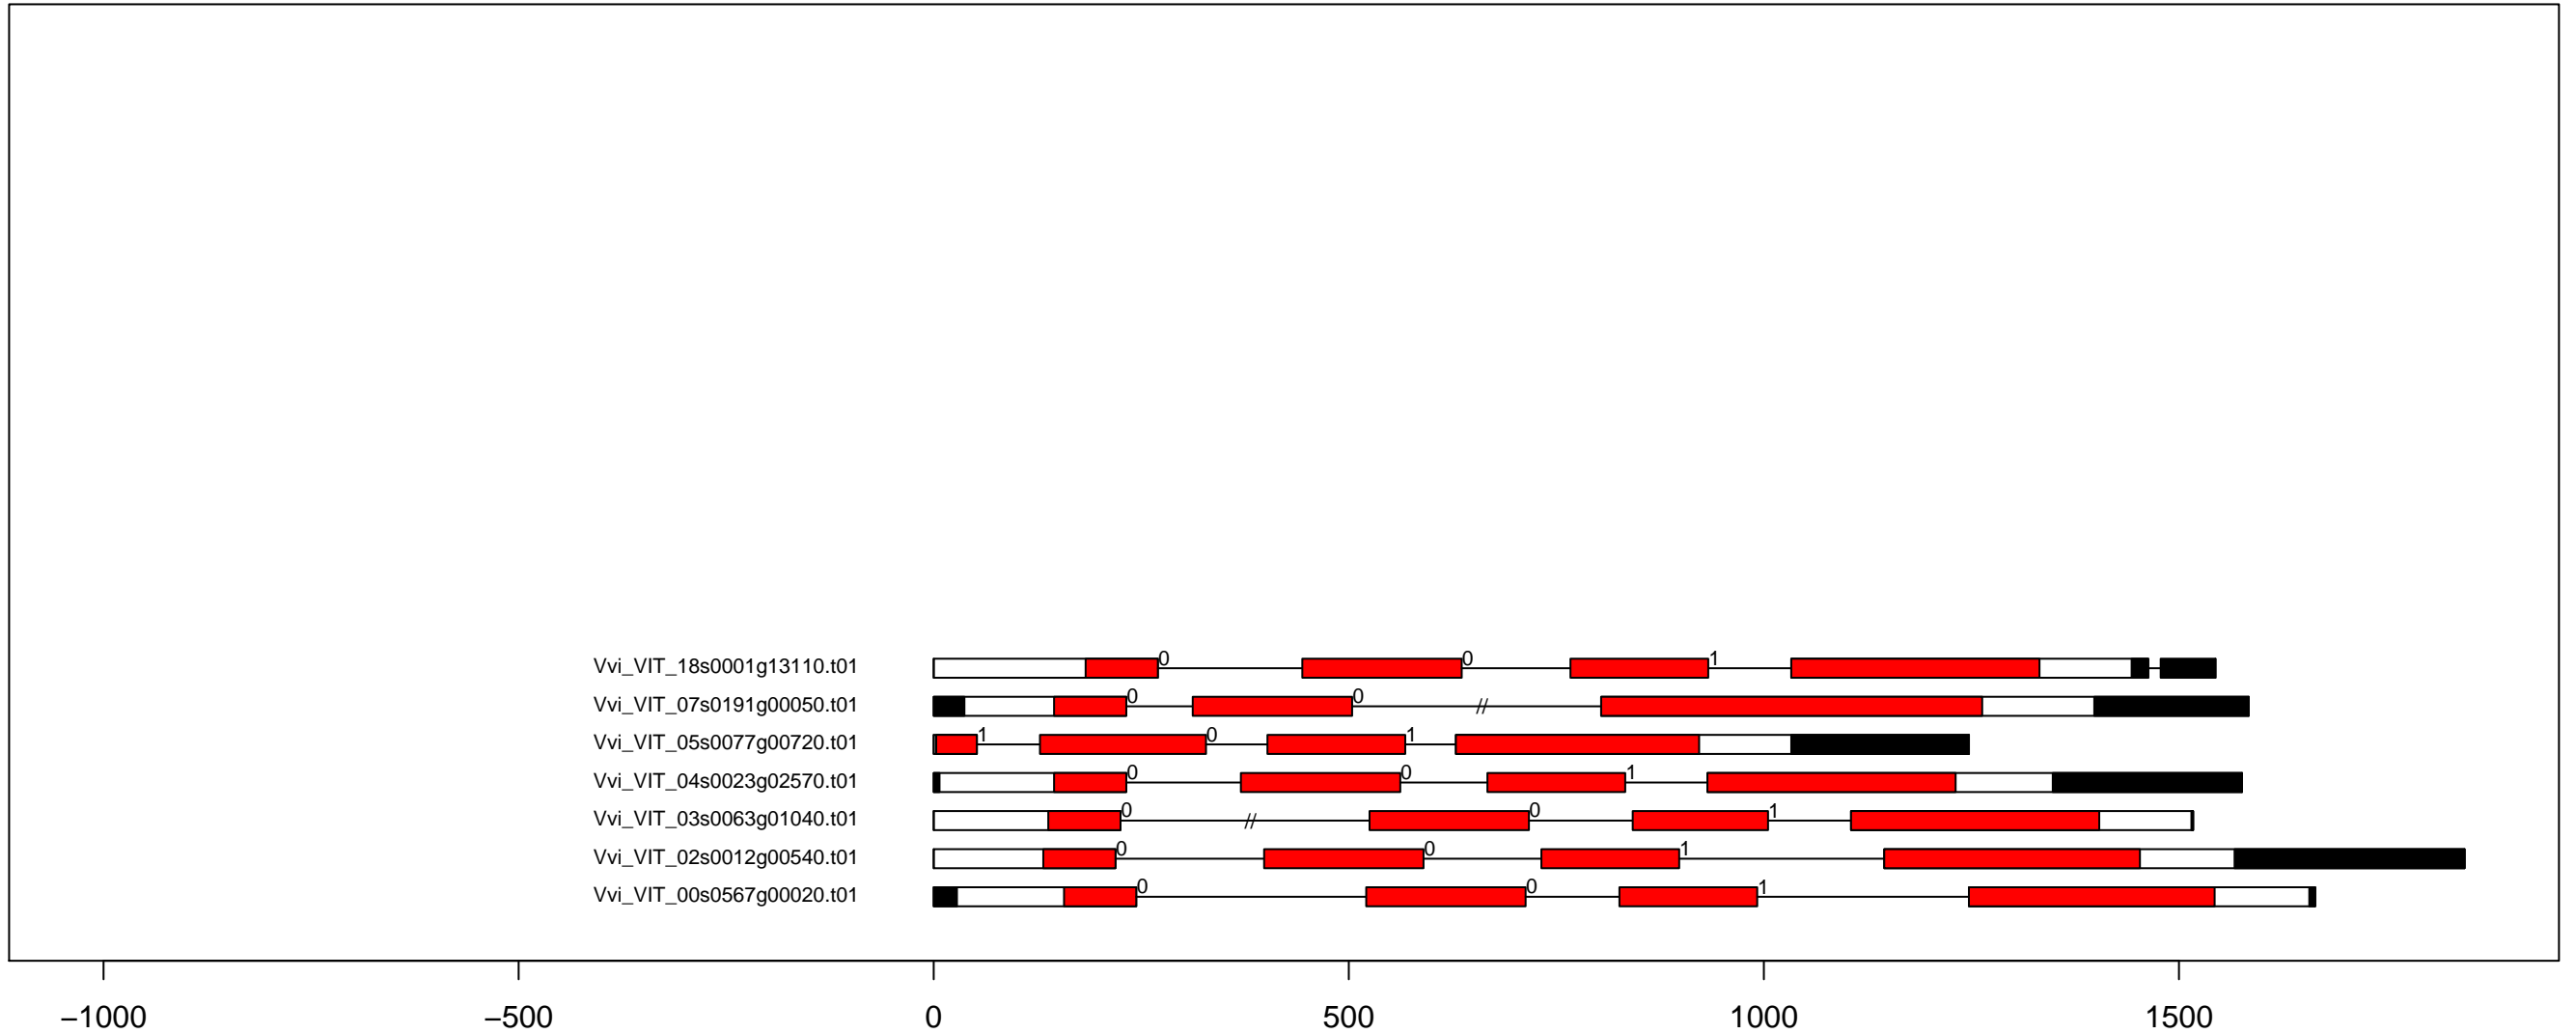

# V.vi class III peroxidase XV subfamily exon-intron and prx domain diagram (all)

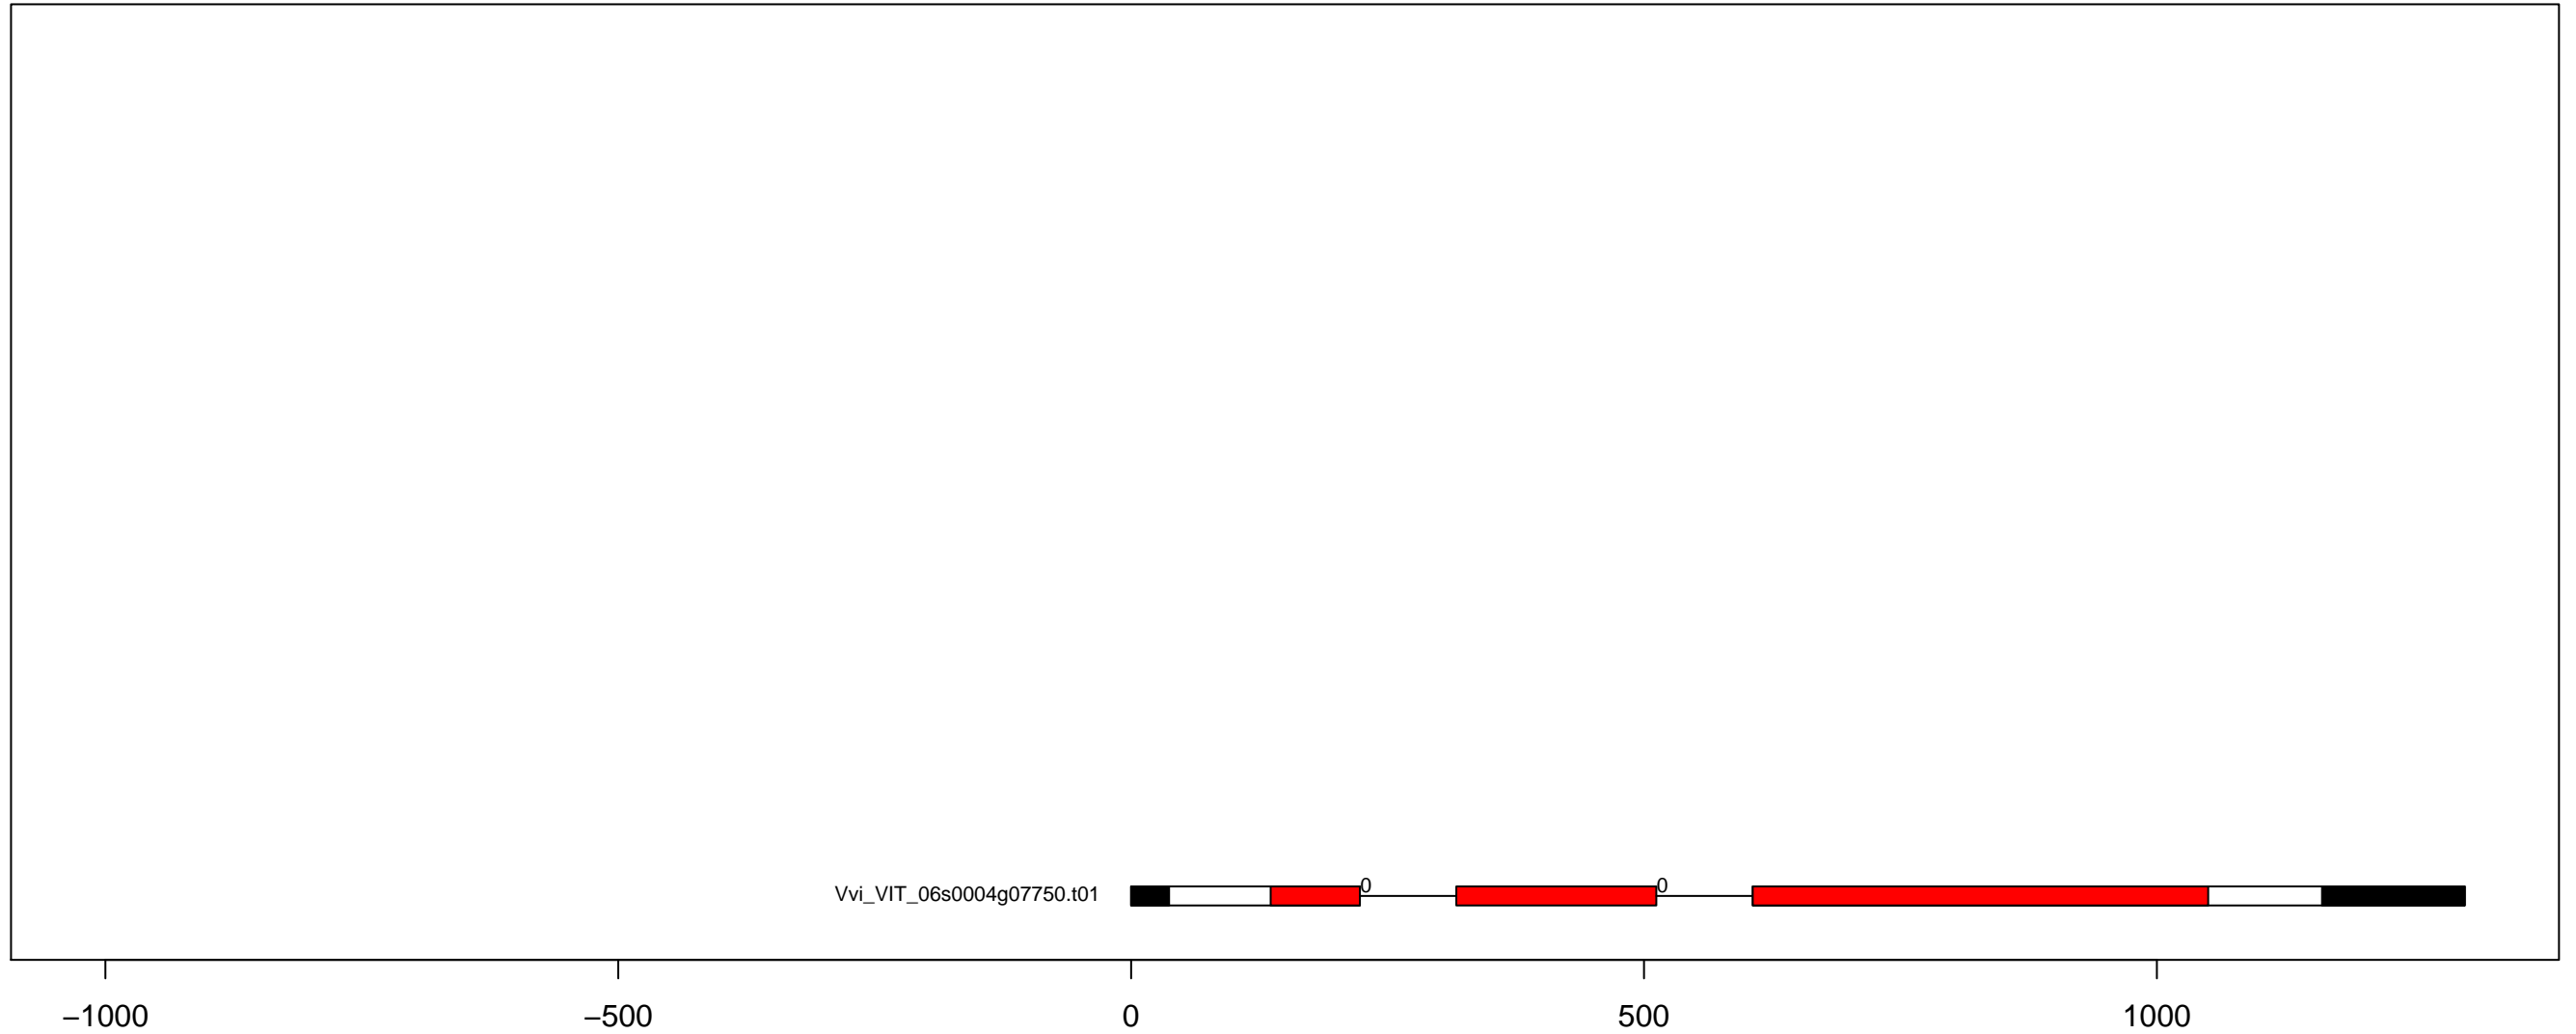

# V.vi class III peroxidase XVI subfamily exon-intron and prx domain diagram (all)

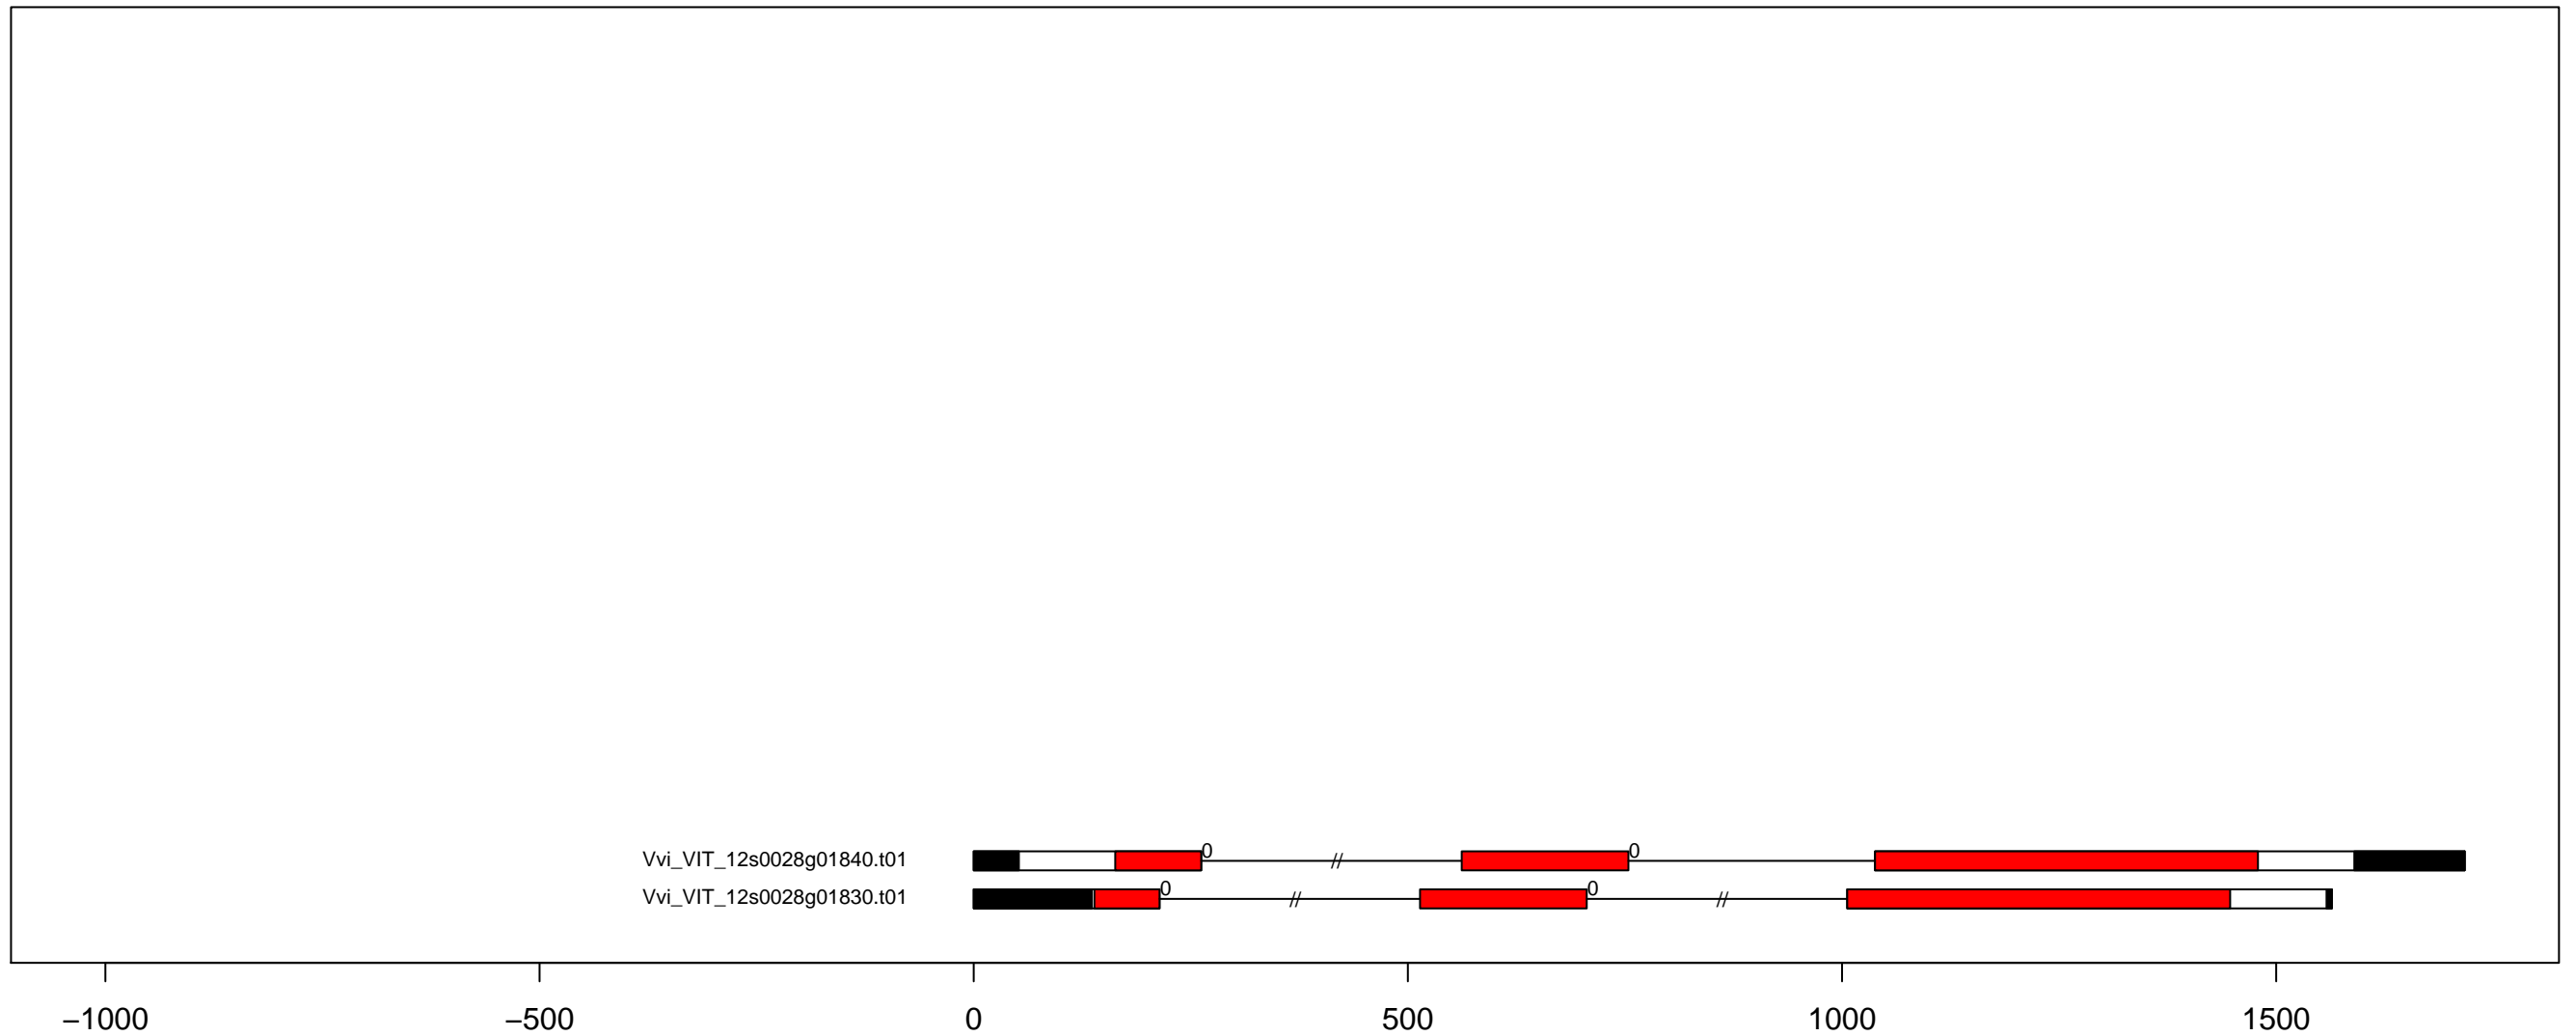

### V.vi class III peroxidase XVII subfamily exon-intron and prx domain diagram (all)

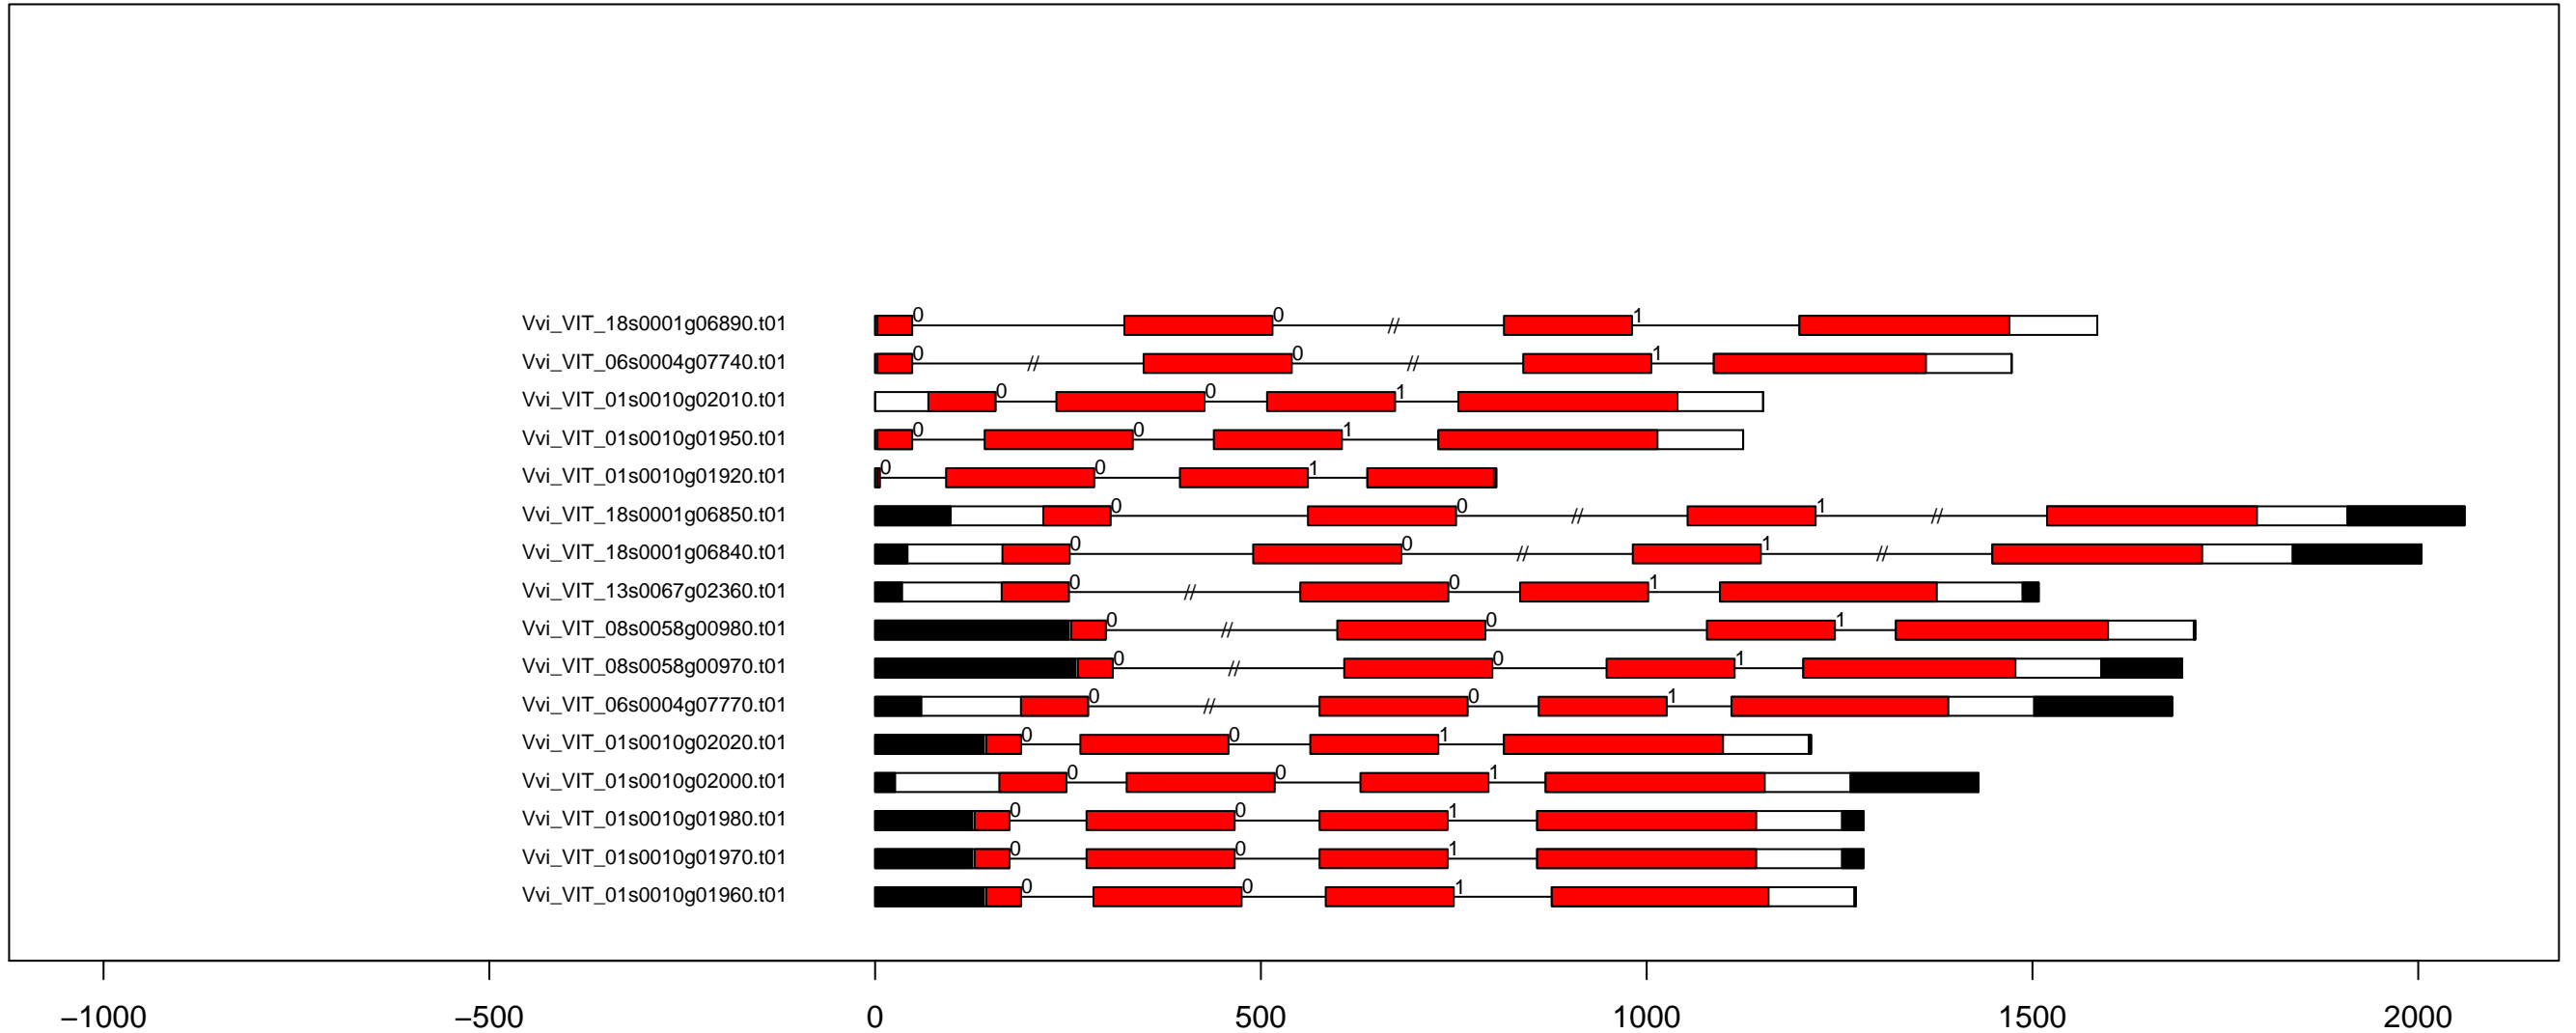

# V.vi class III peroxidase XVIII subfamily exon-intron and prx domain diagram (all)

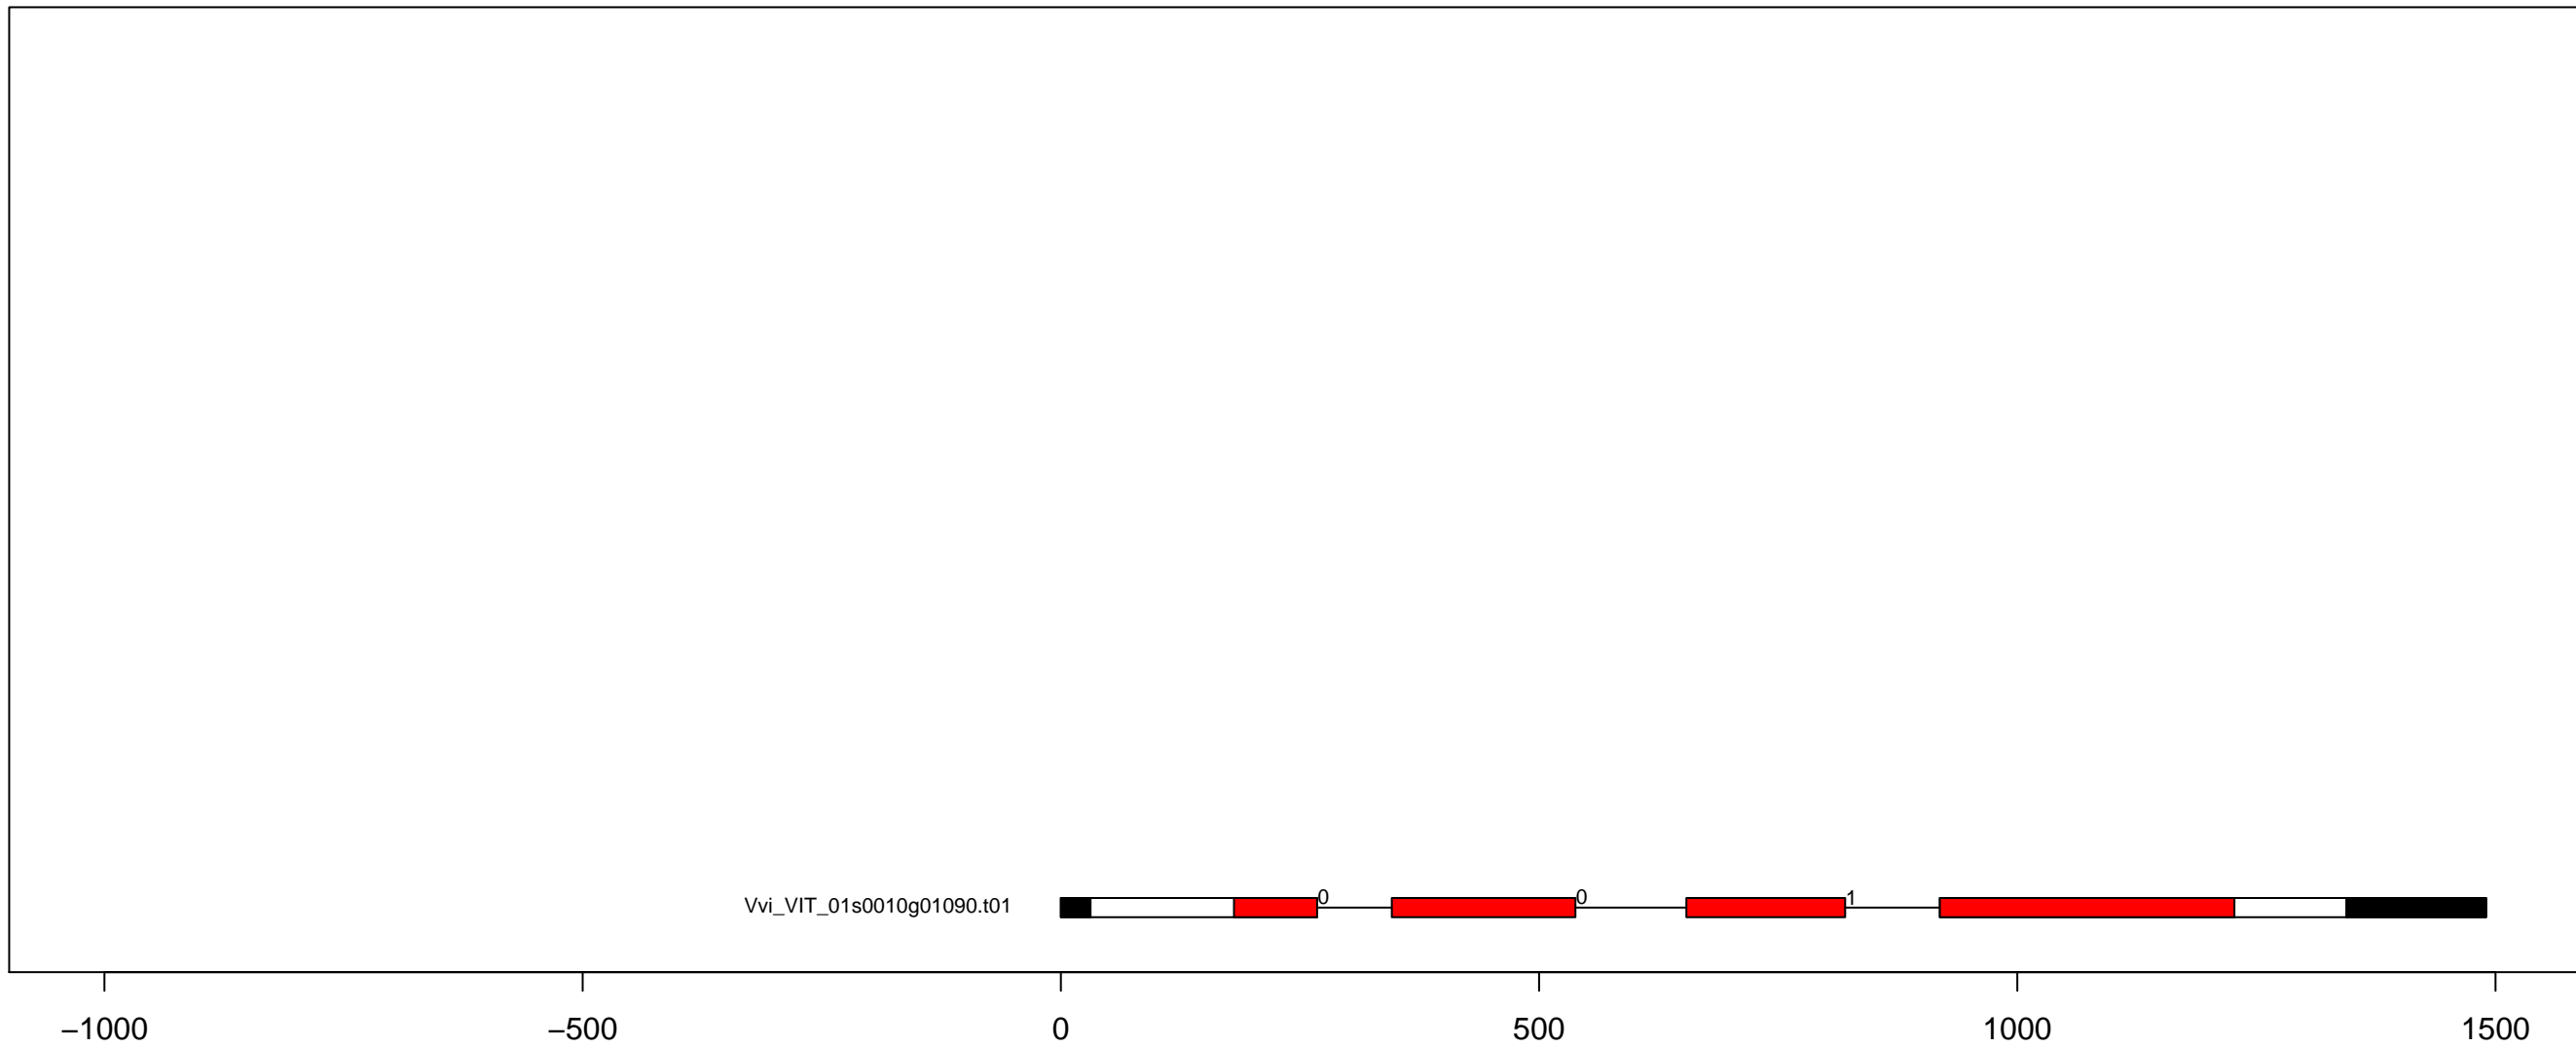

# V.vi class III peroxidase unclar\_classifications subfamily exon-intron and prx domain diagram (all)

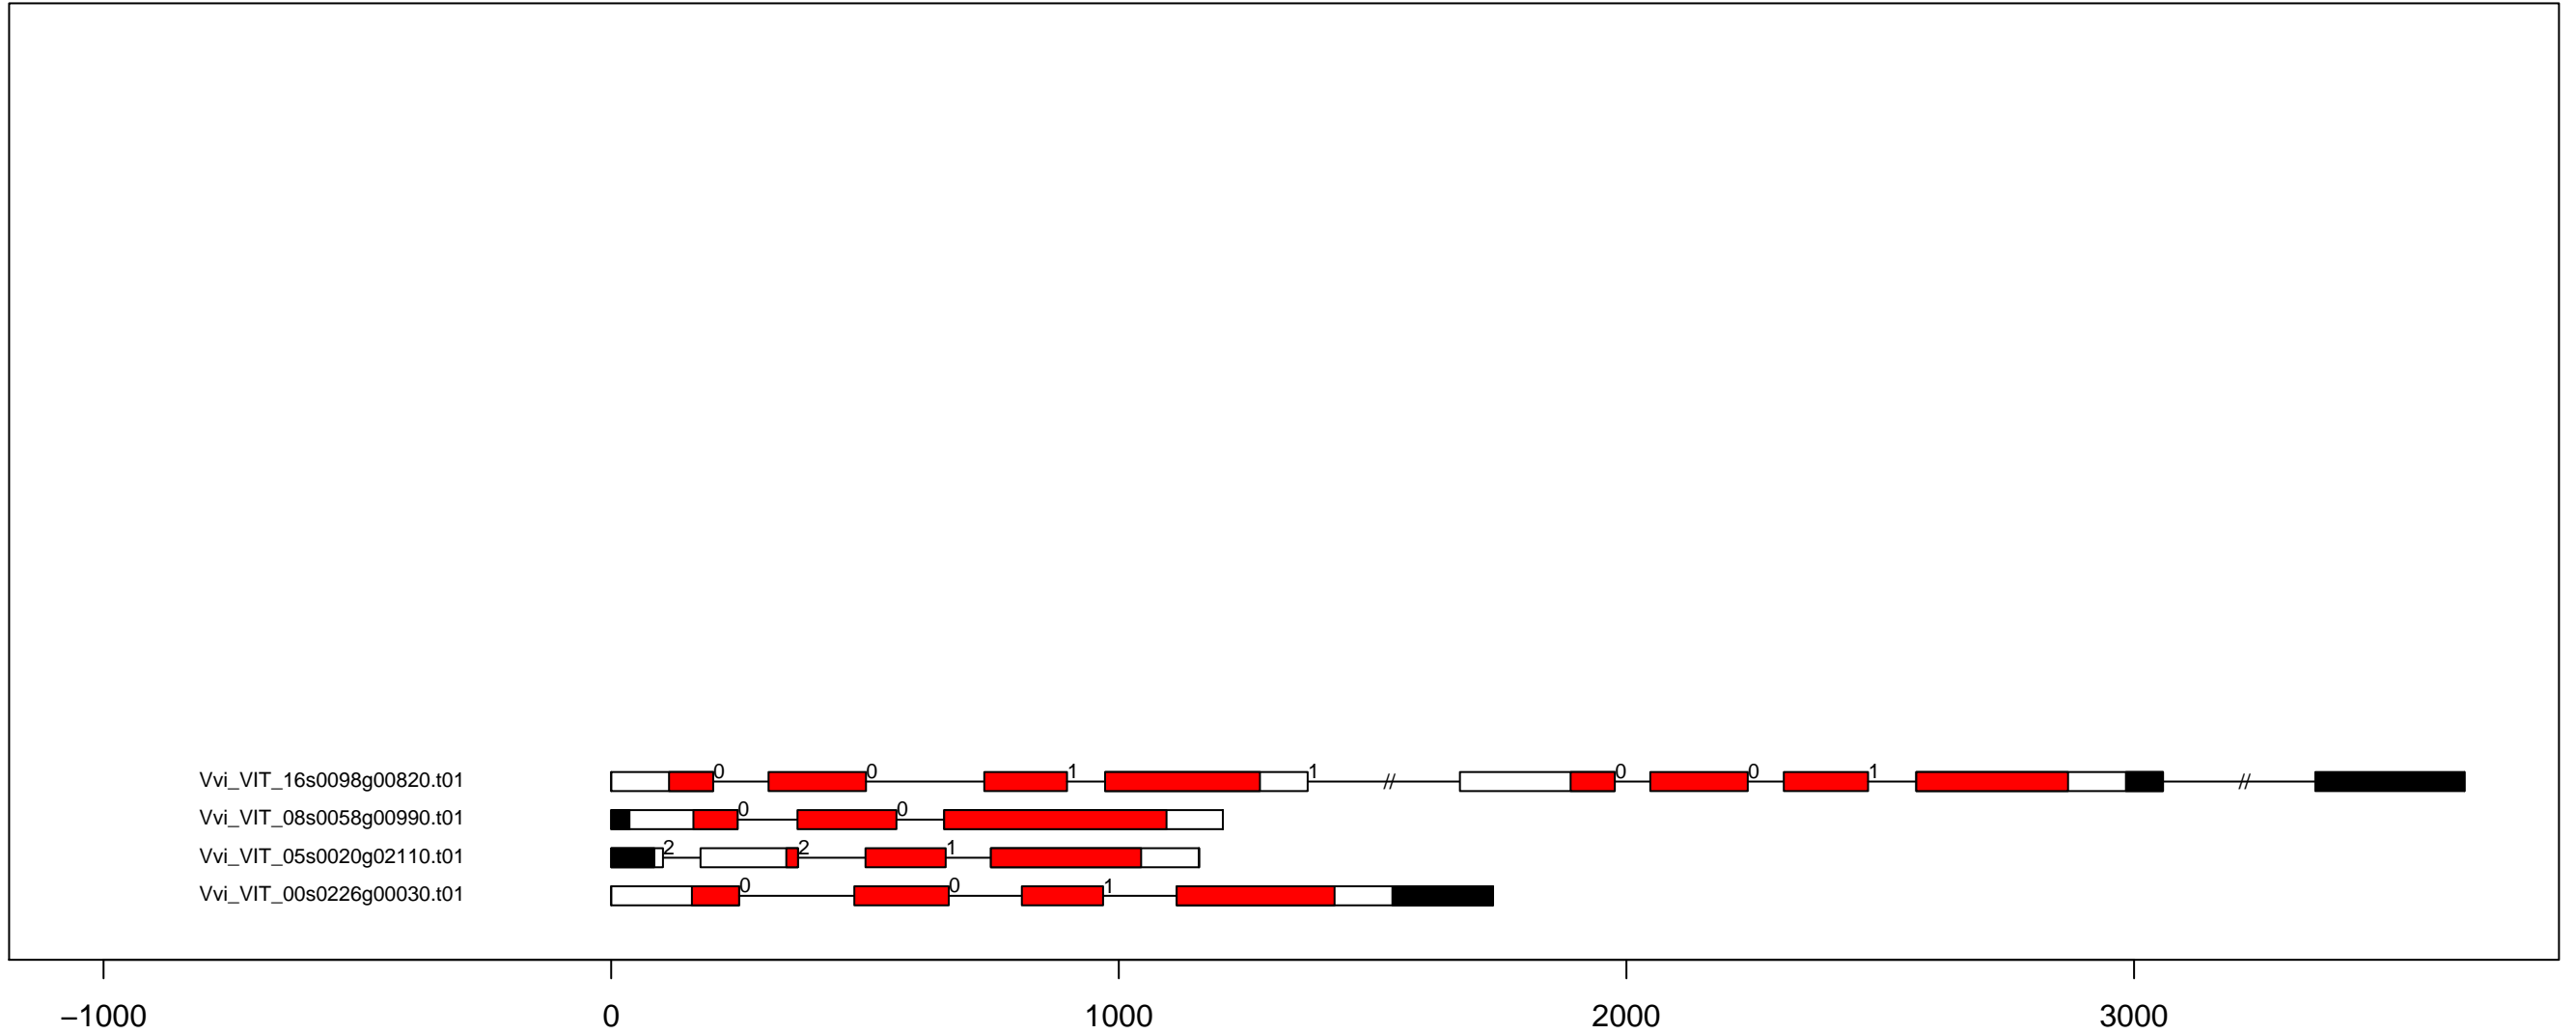

### S.mo class III peroxidase I subfamily exon-intron and prx domain diagram (part 1)

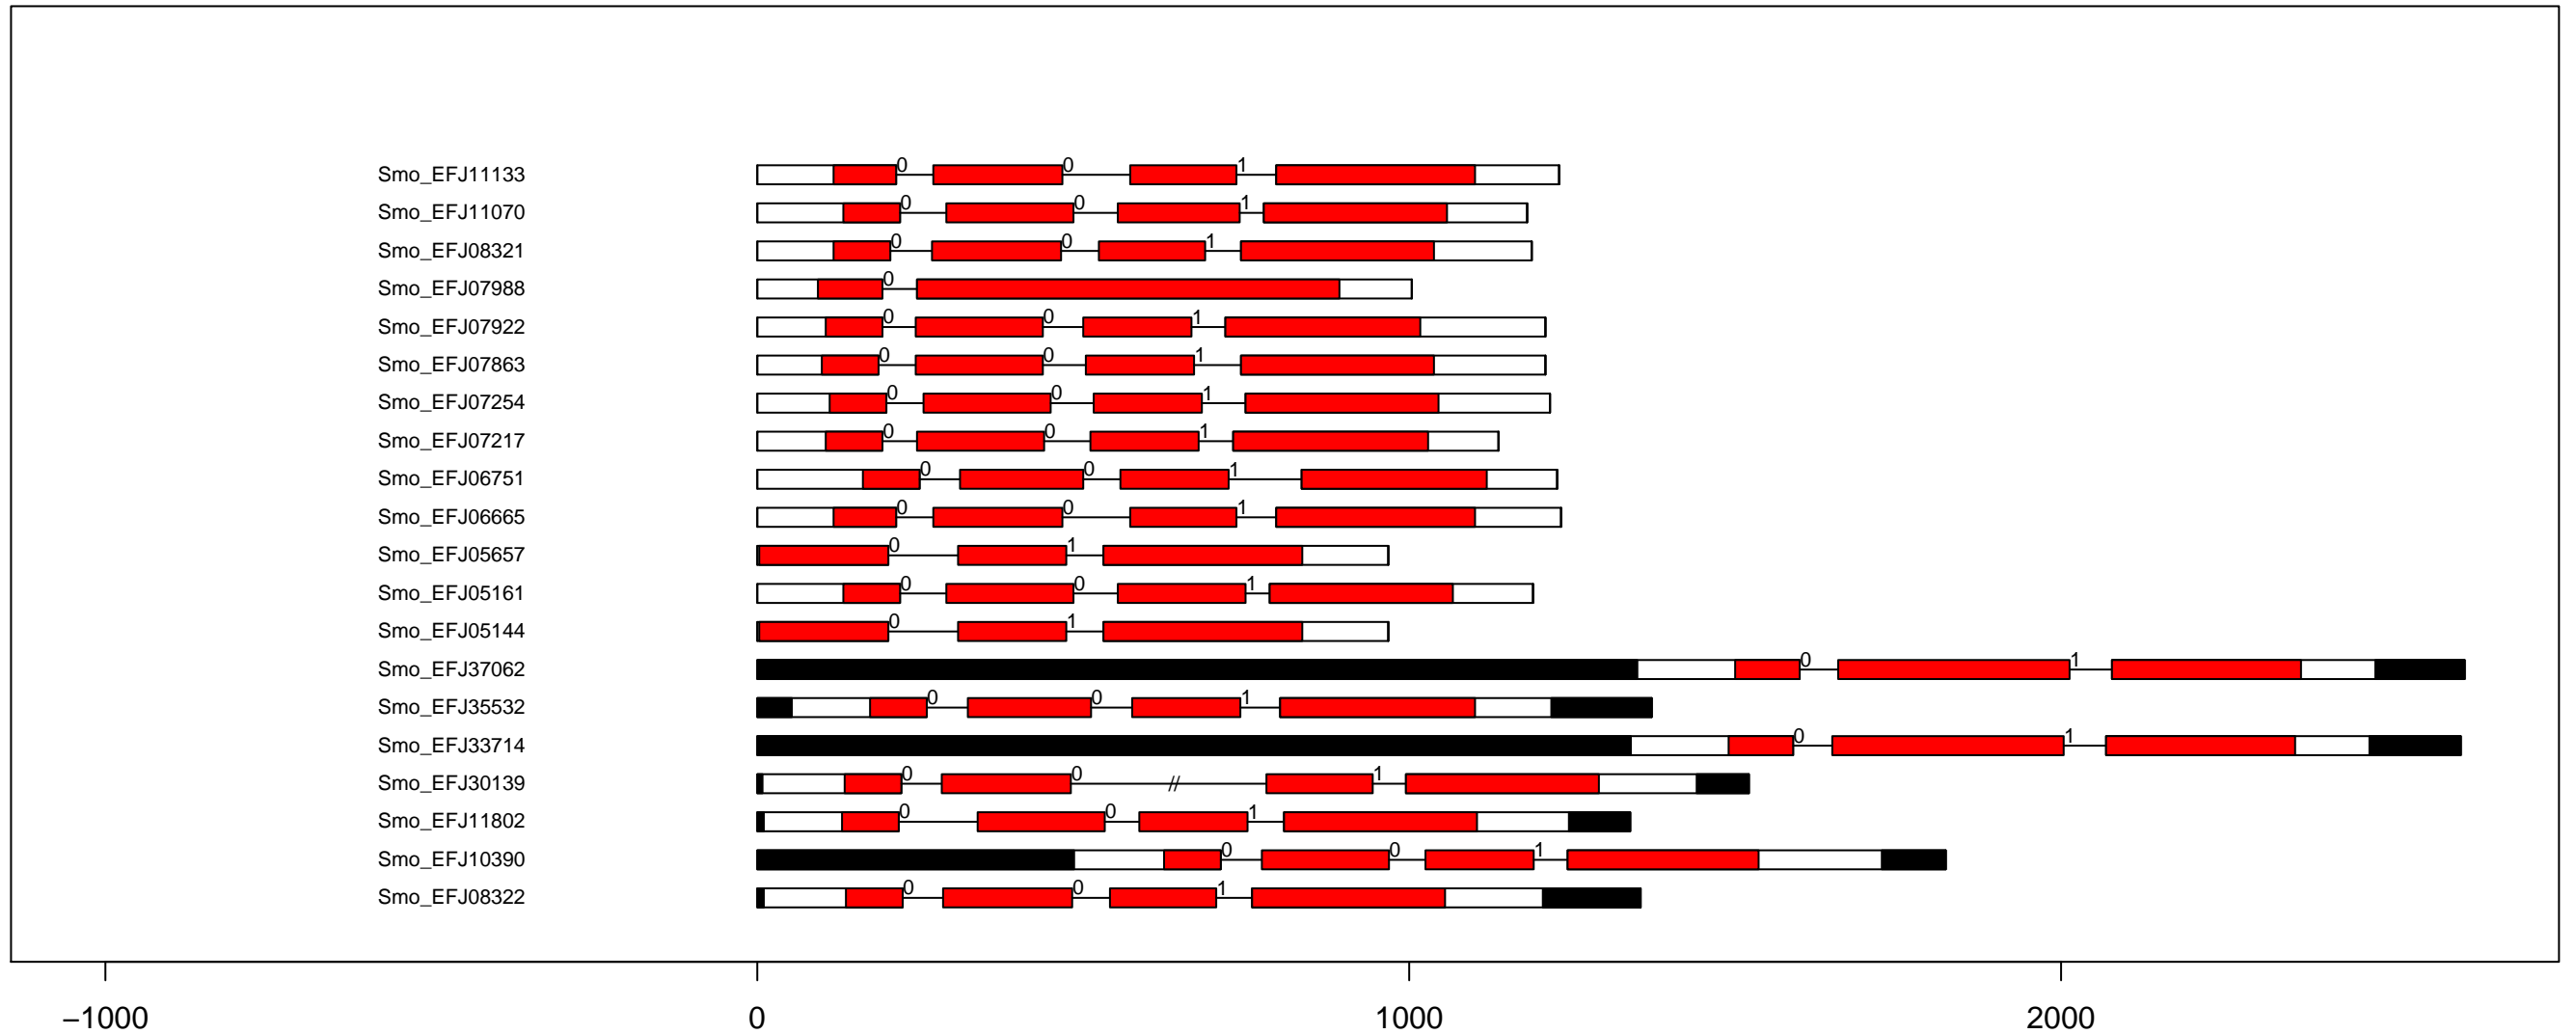

## S.mo class III peroxidase I subfamily exon-intron and prx domain diagram (part 2)

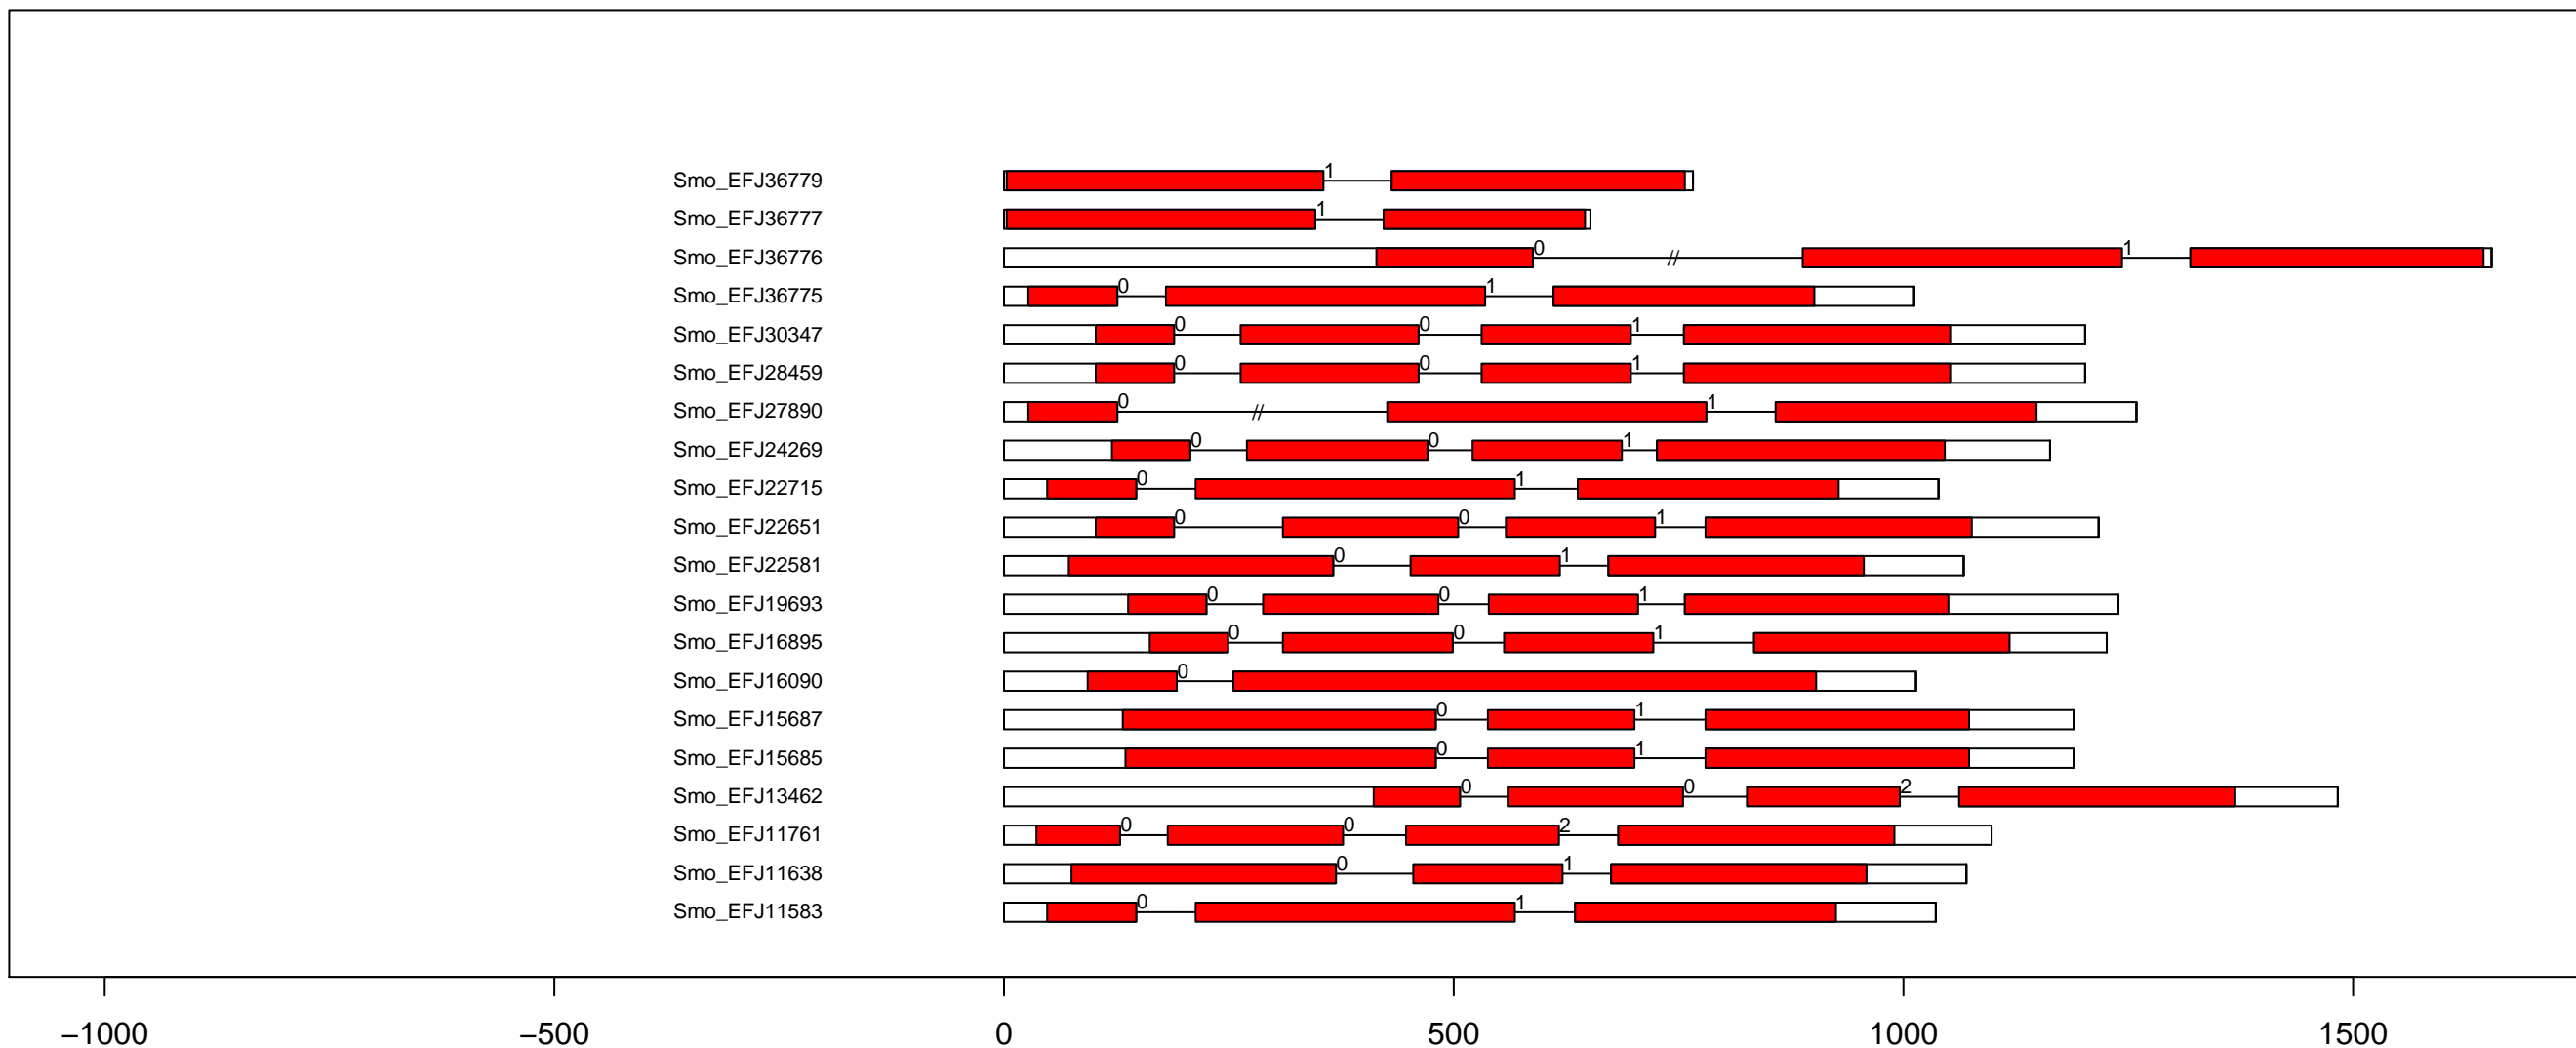



### S.mo class III peroxidase I subfamily exon-intron and prx domain diagram (part 3)

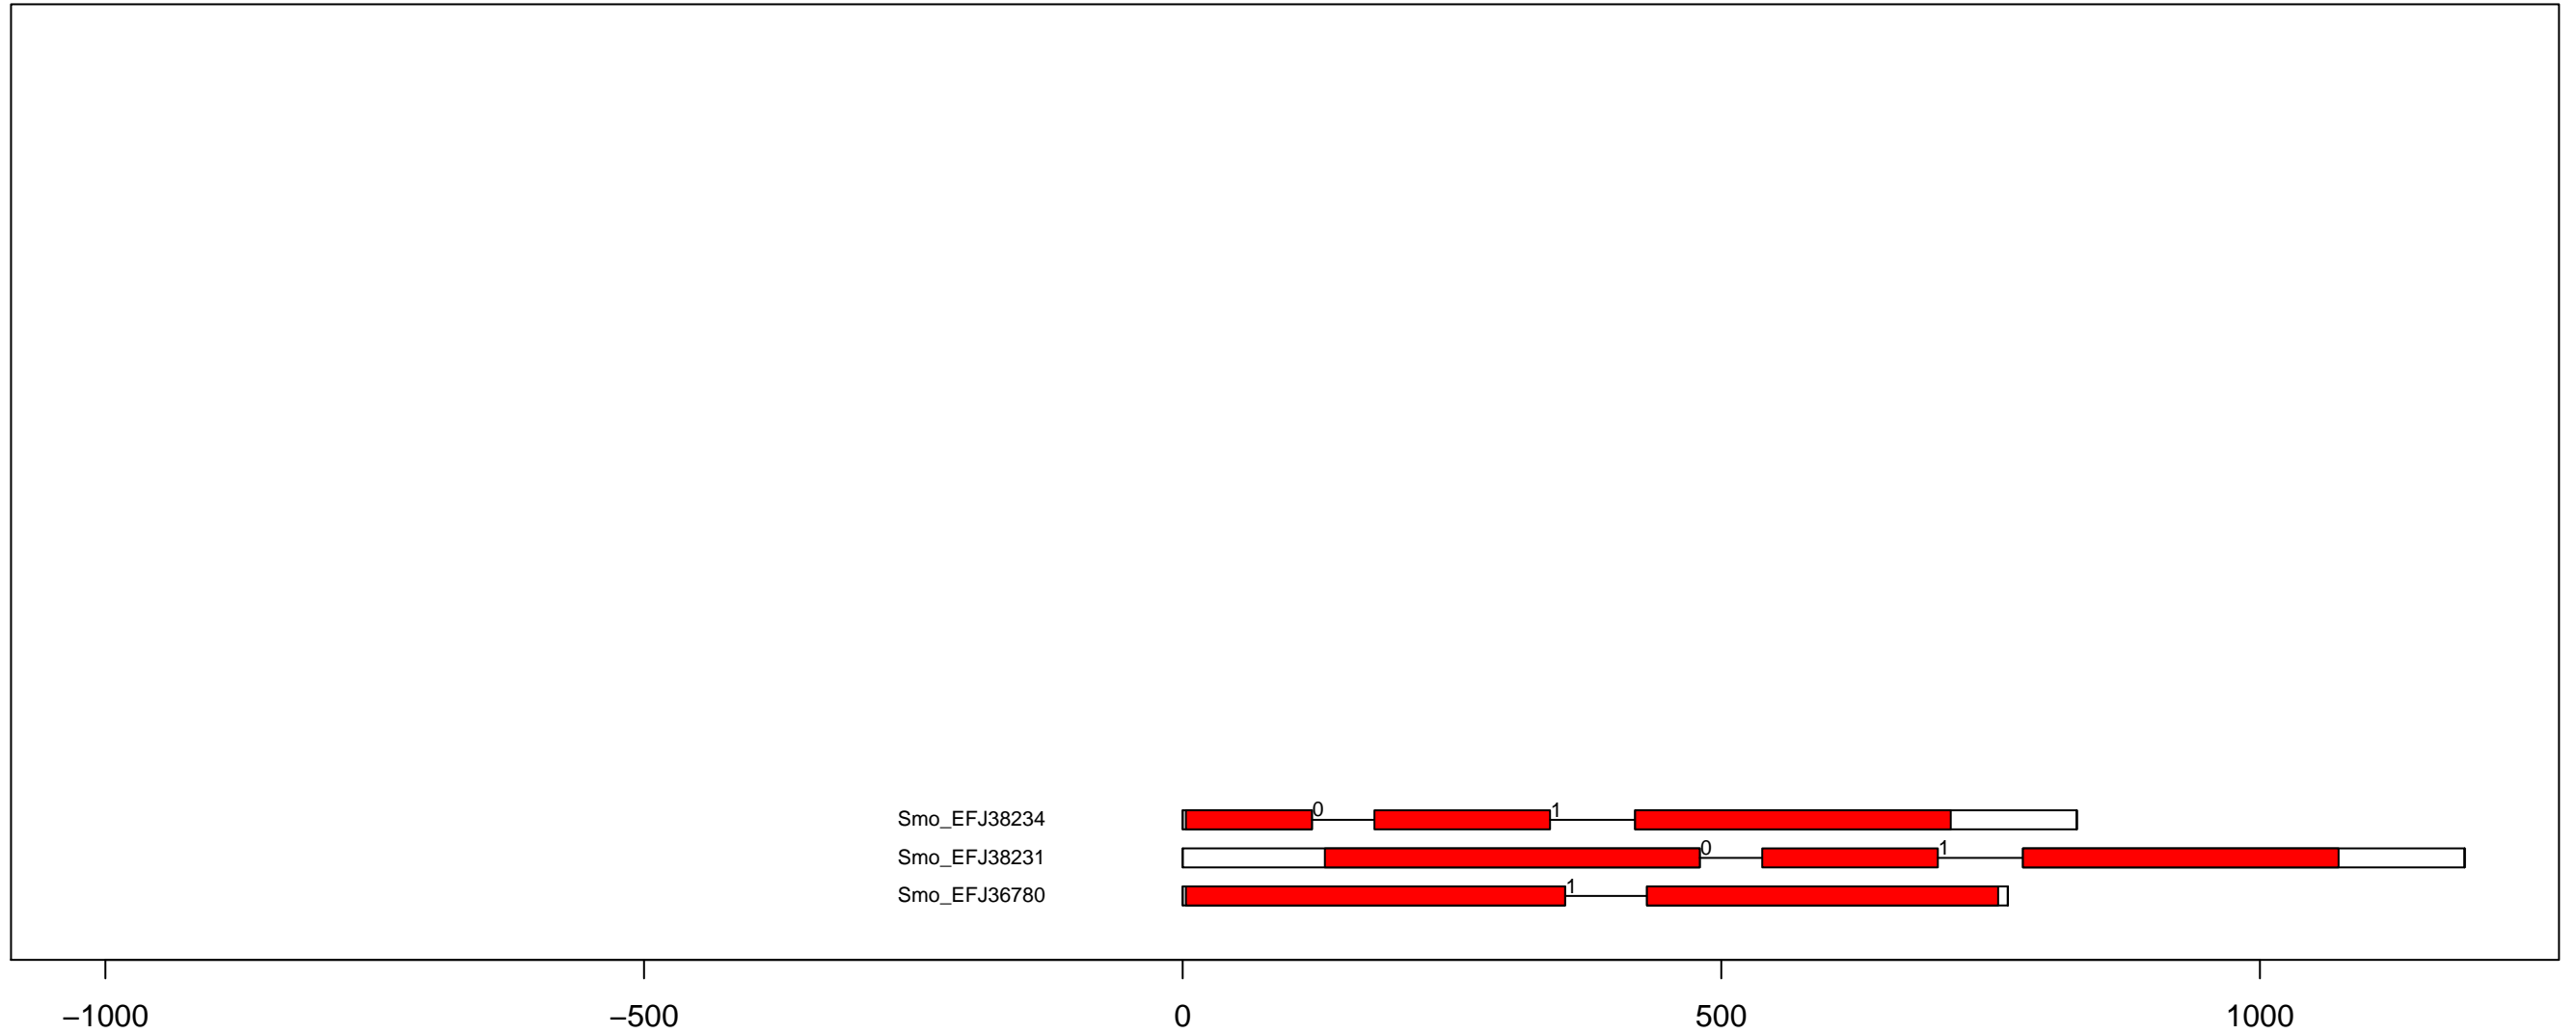

# S.mo class III peroxidase III subfamily exon-intron and prx domain diagram (all)

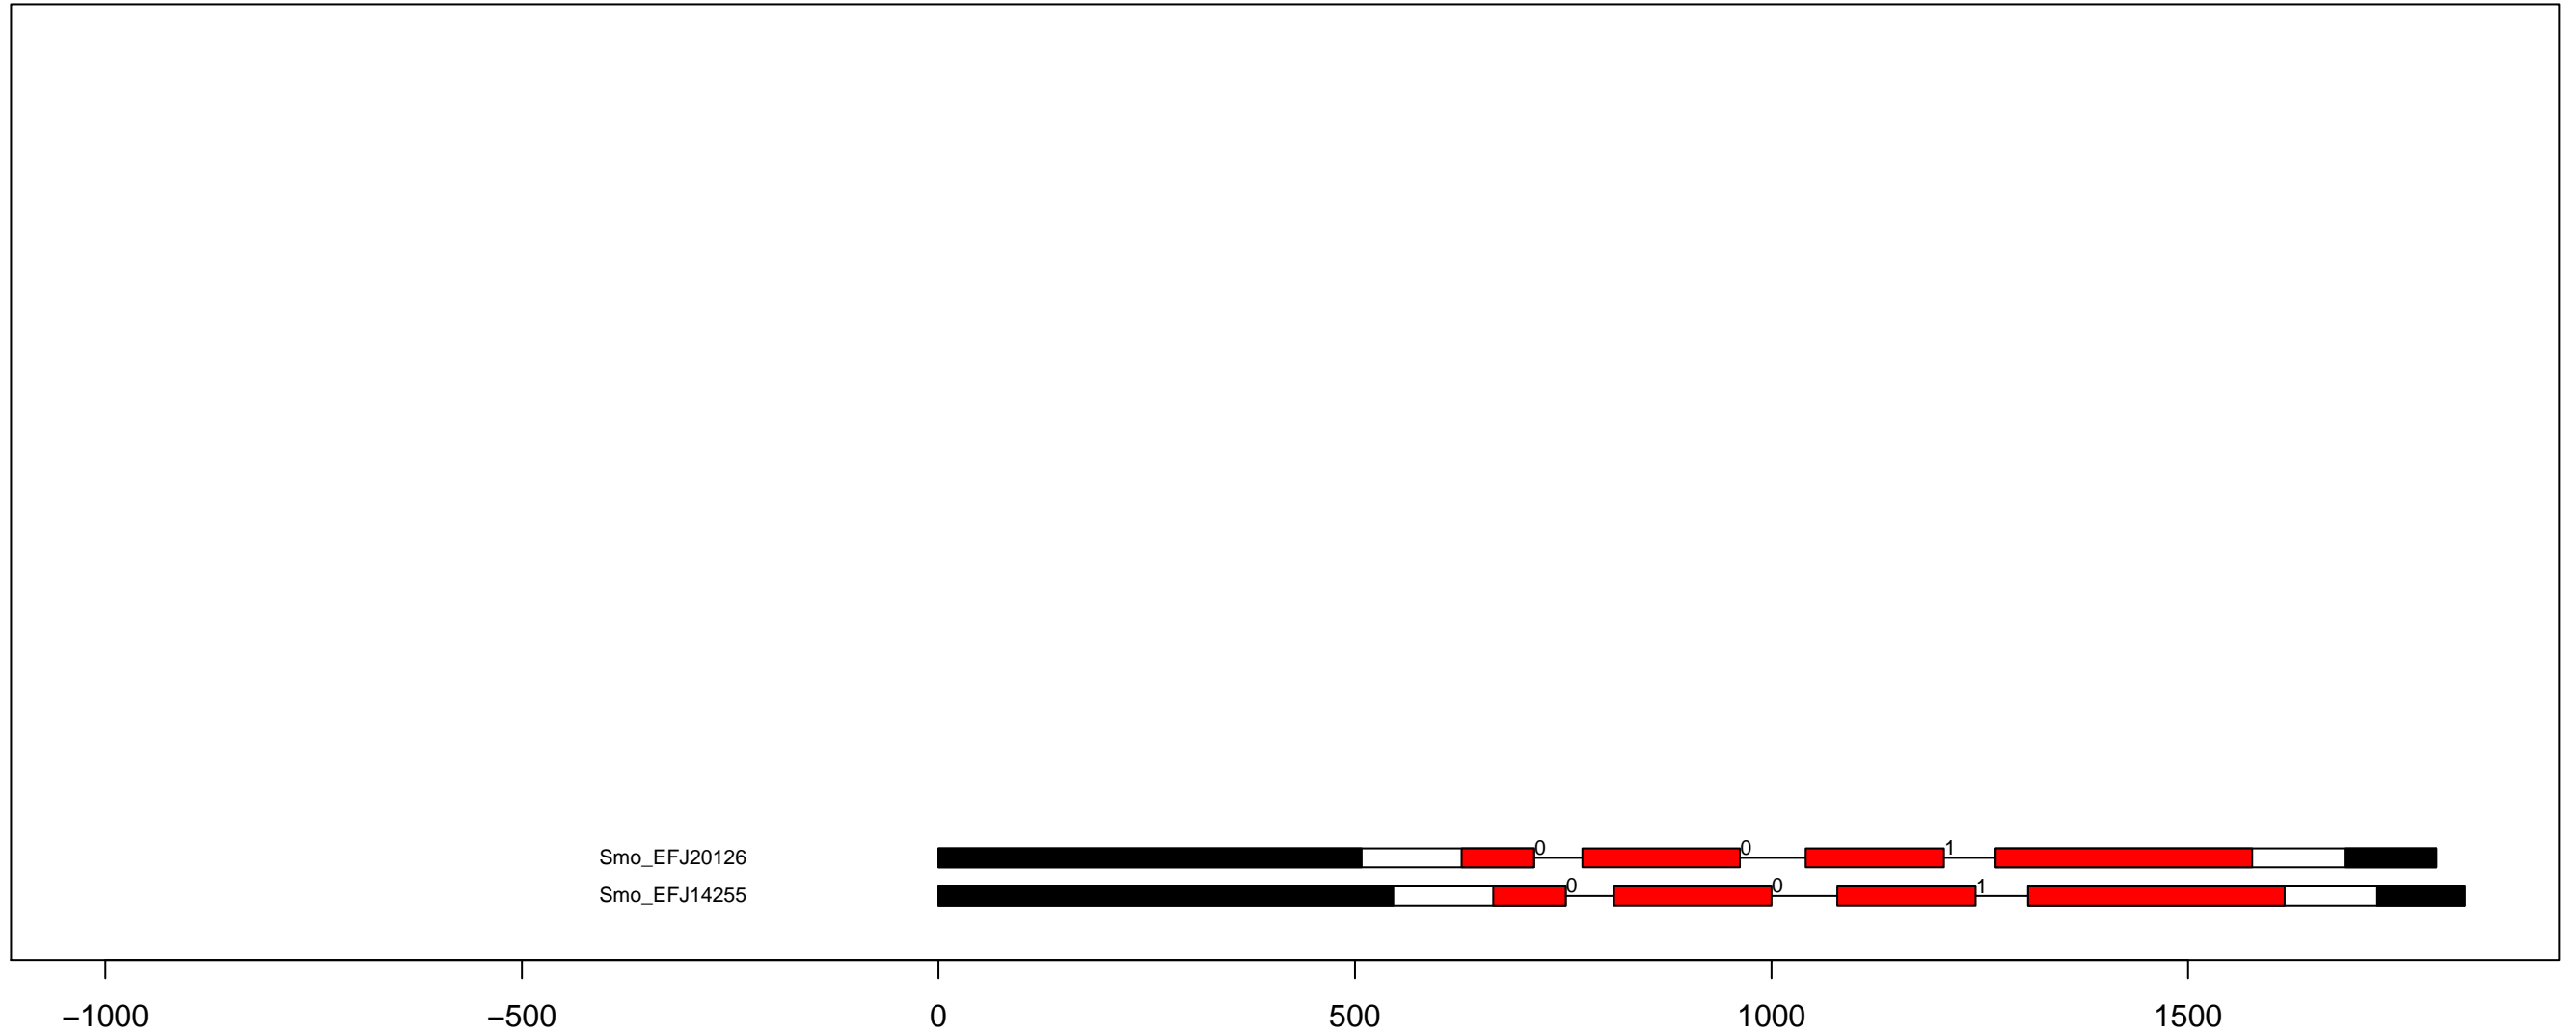

### S.mo class III peroxidase V subfamily exon-intron and prx domain diagram (all)

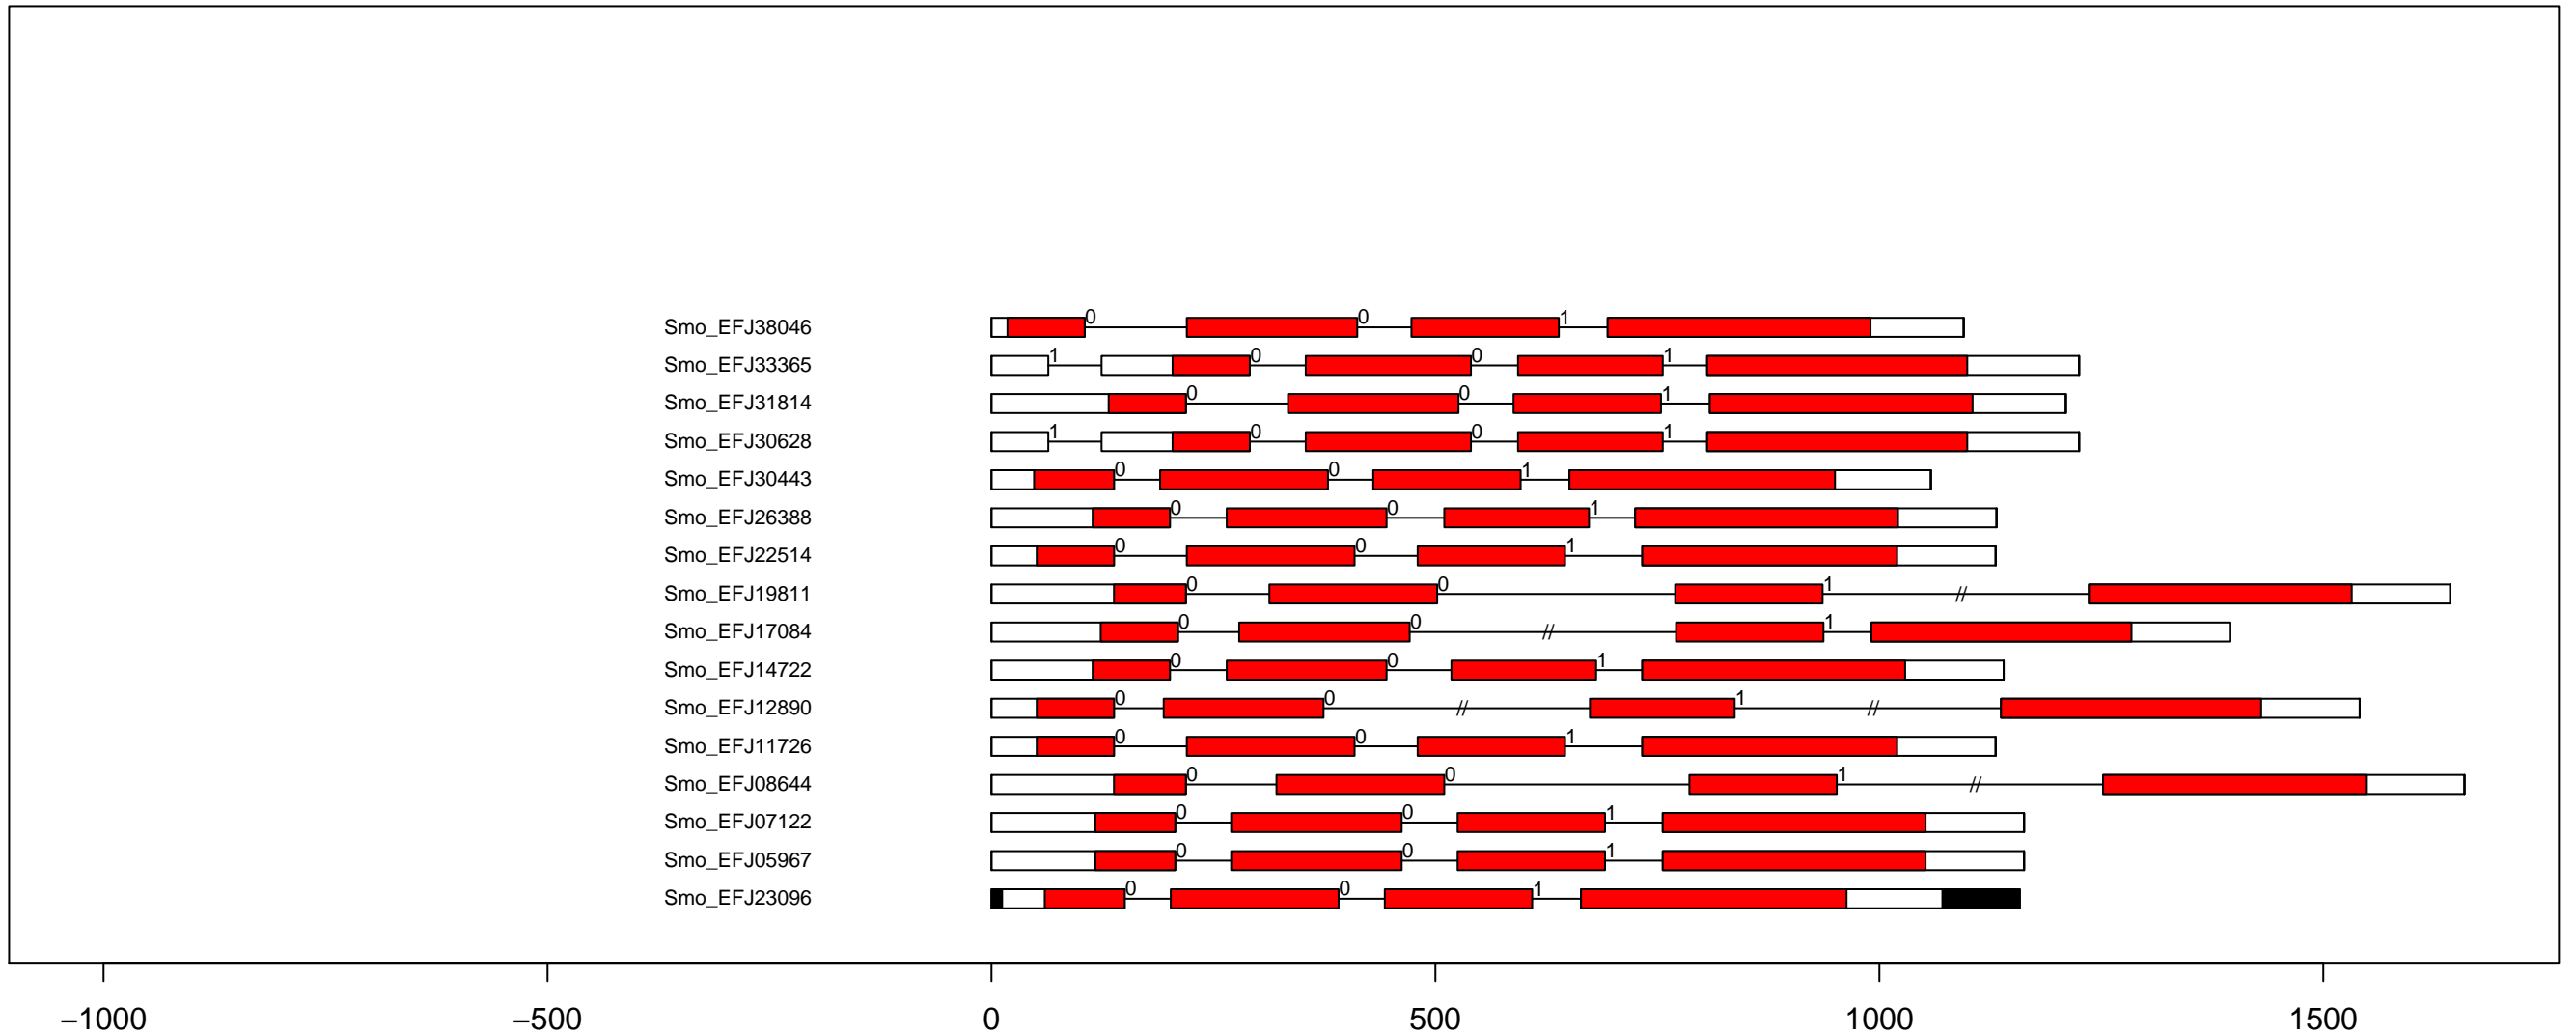

# S.mo class III peroxidase VI subfamily exon-intron and prx domain diagram (all)

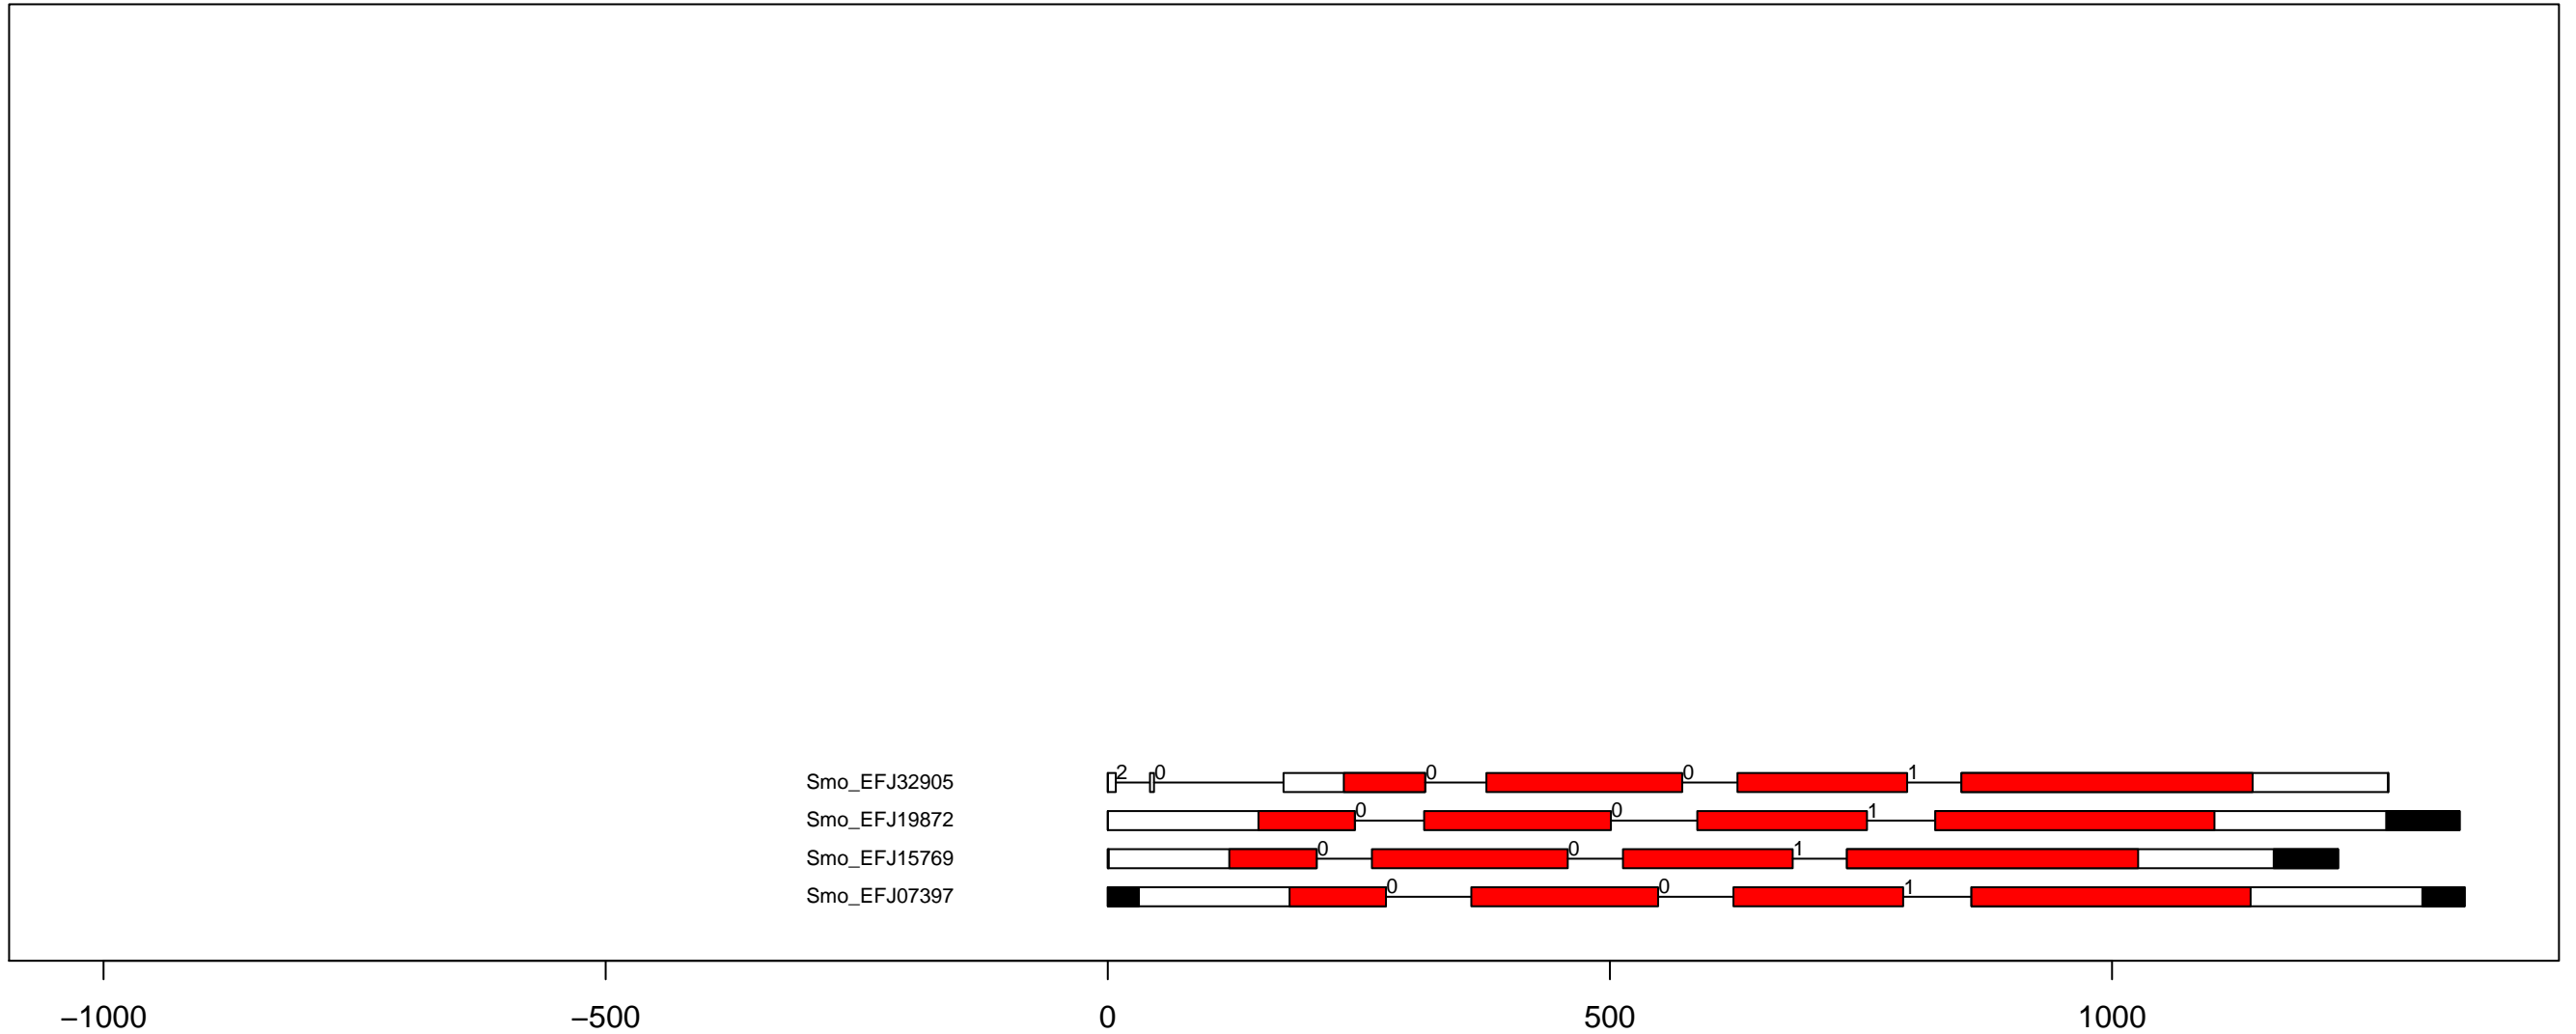



### S.mo class III peroxidase IX subfamily exon-intron and prx domain diagram (part 1)

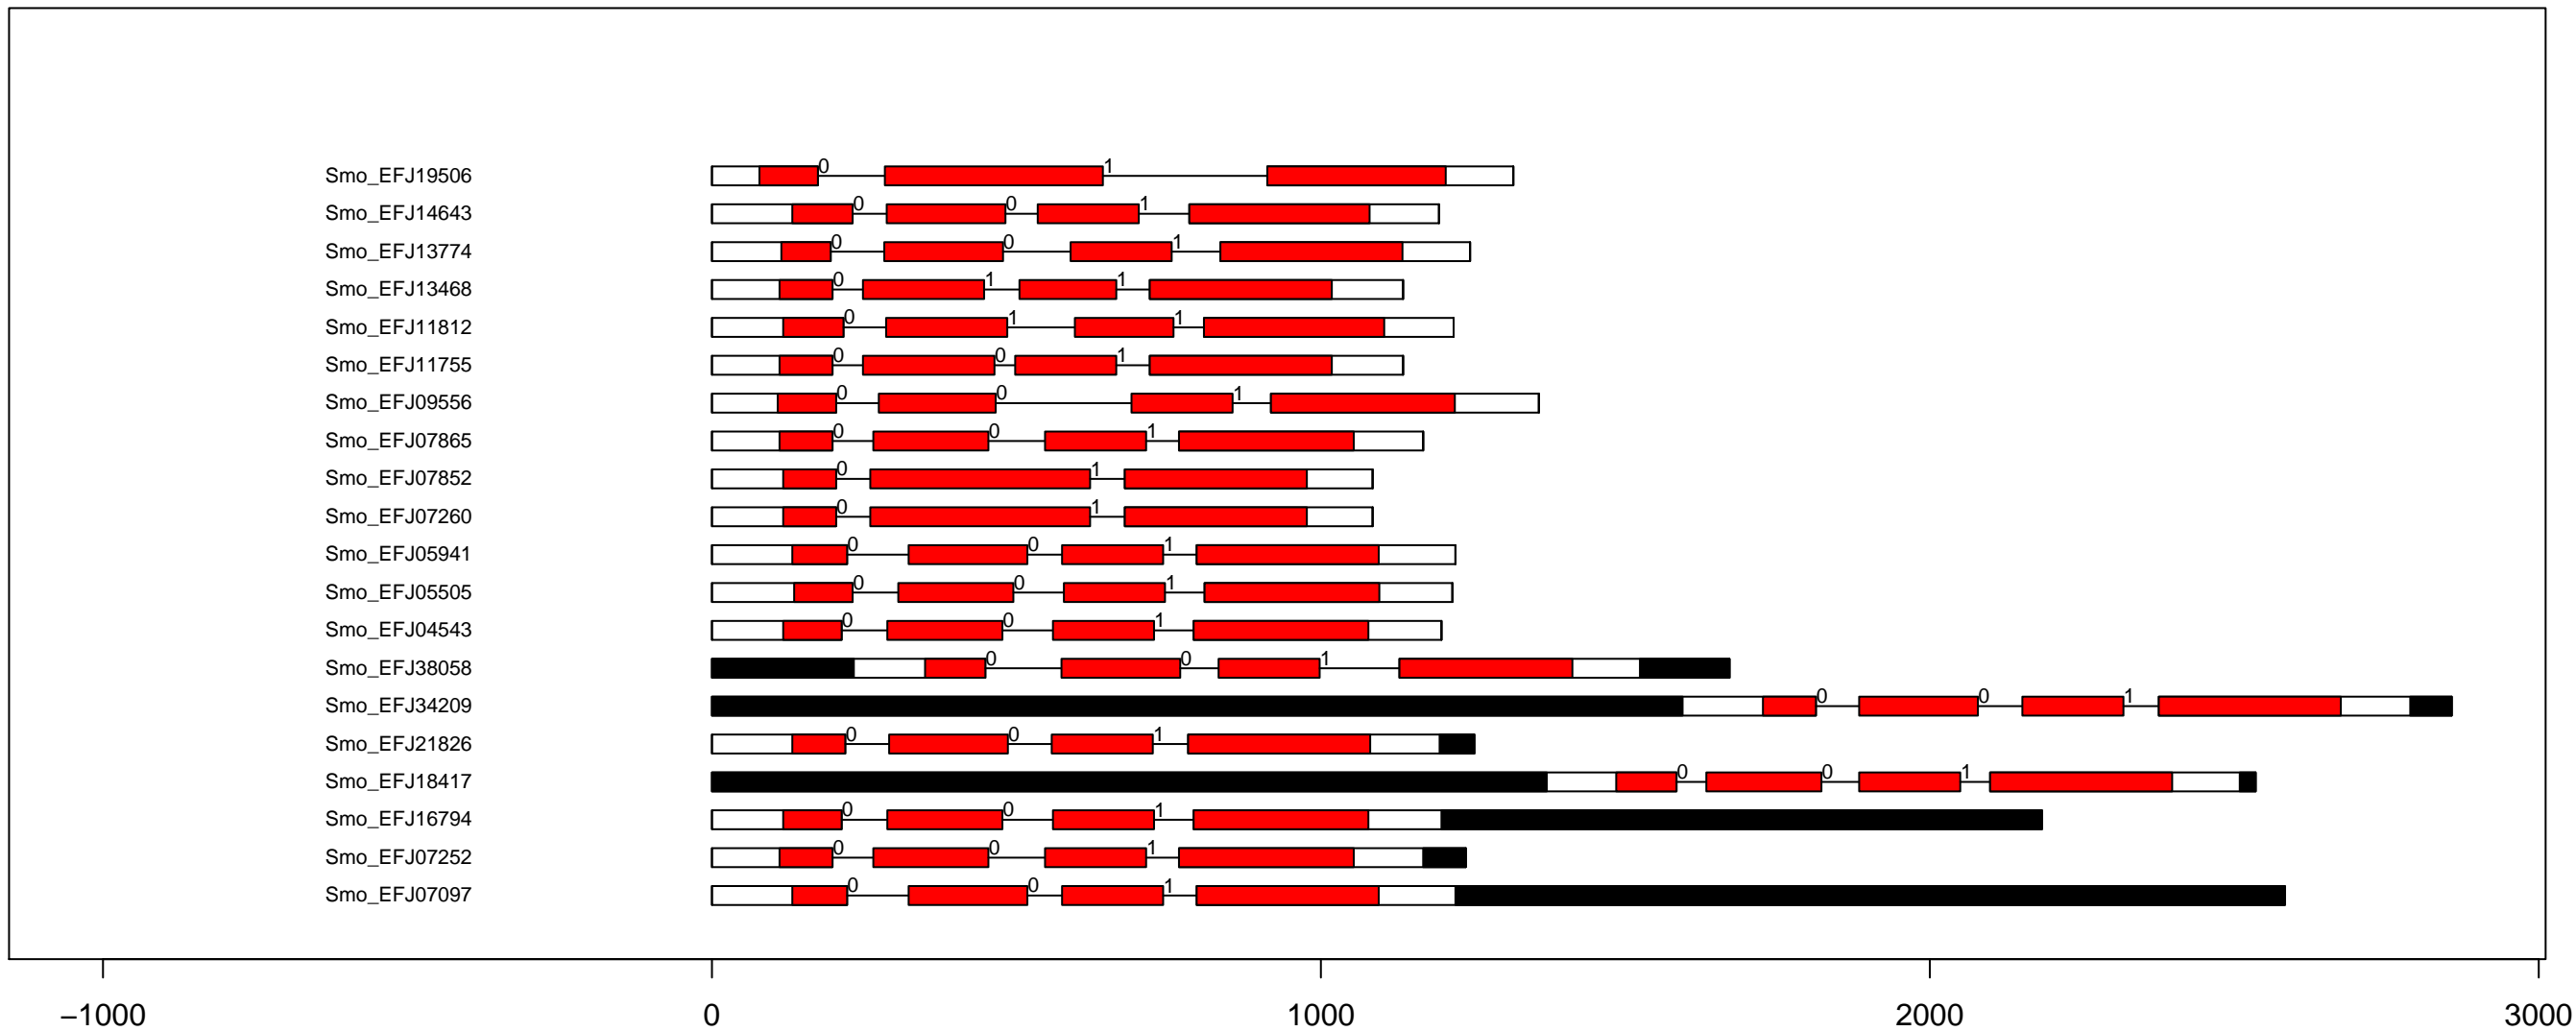



### S.mo class III peroxidase XIV subfamily exon-intron and prx domain diagram (all)

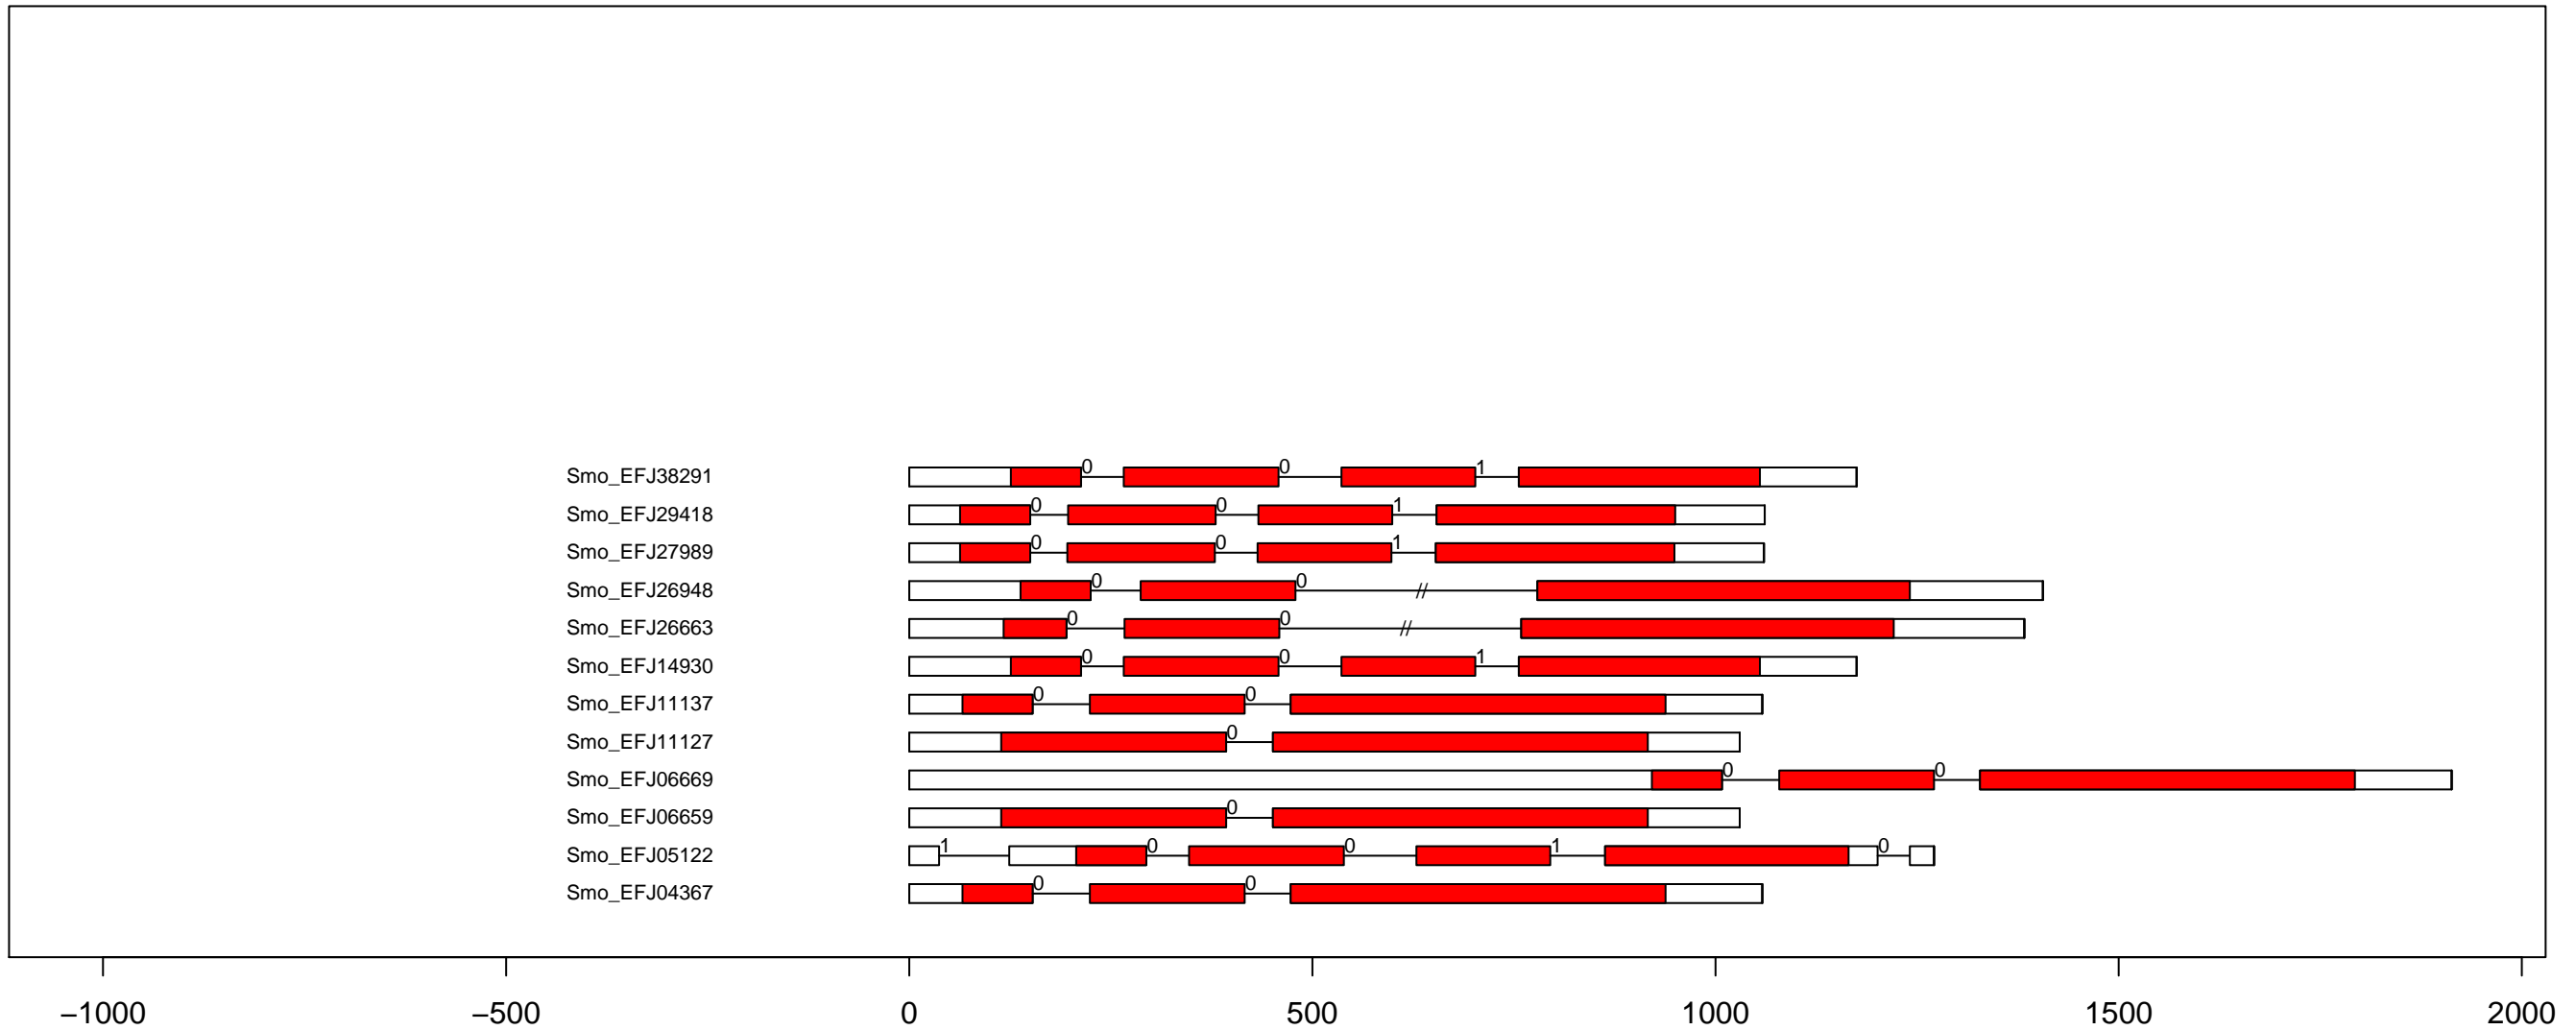



# S.mo class III peroxidase XV subfamily exon-intron and prx domain diagram (all)

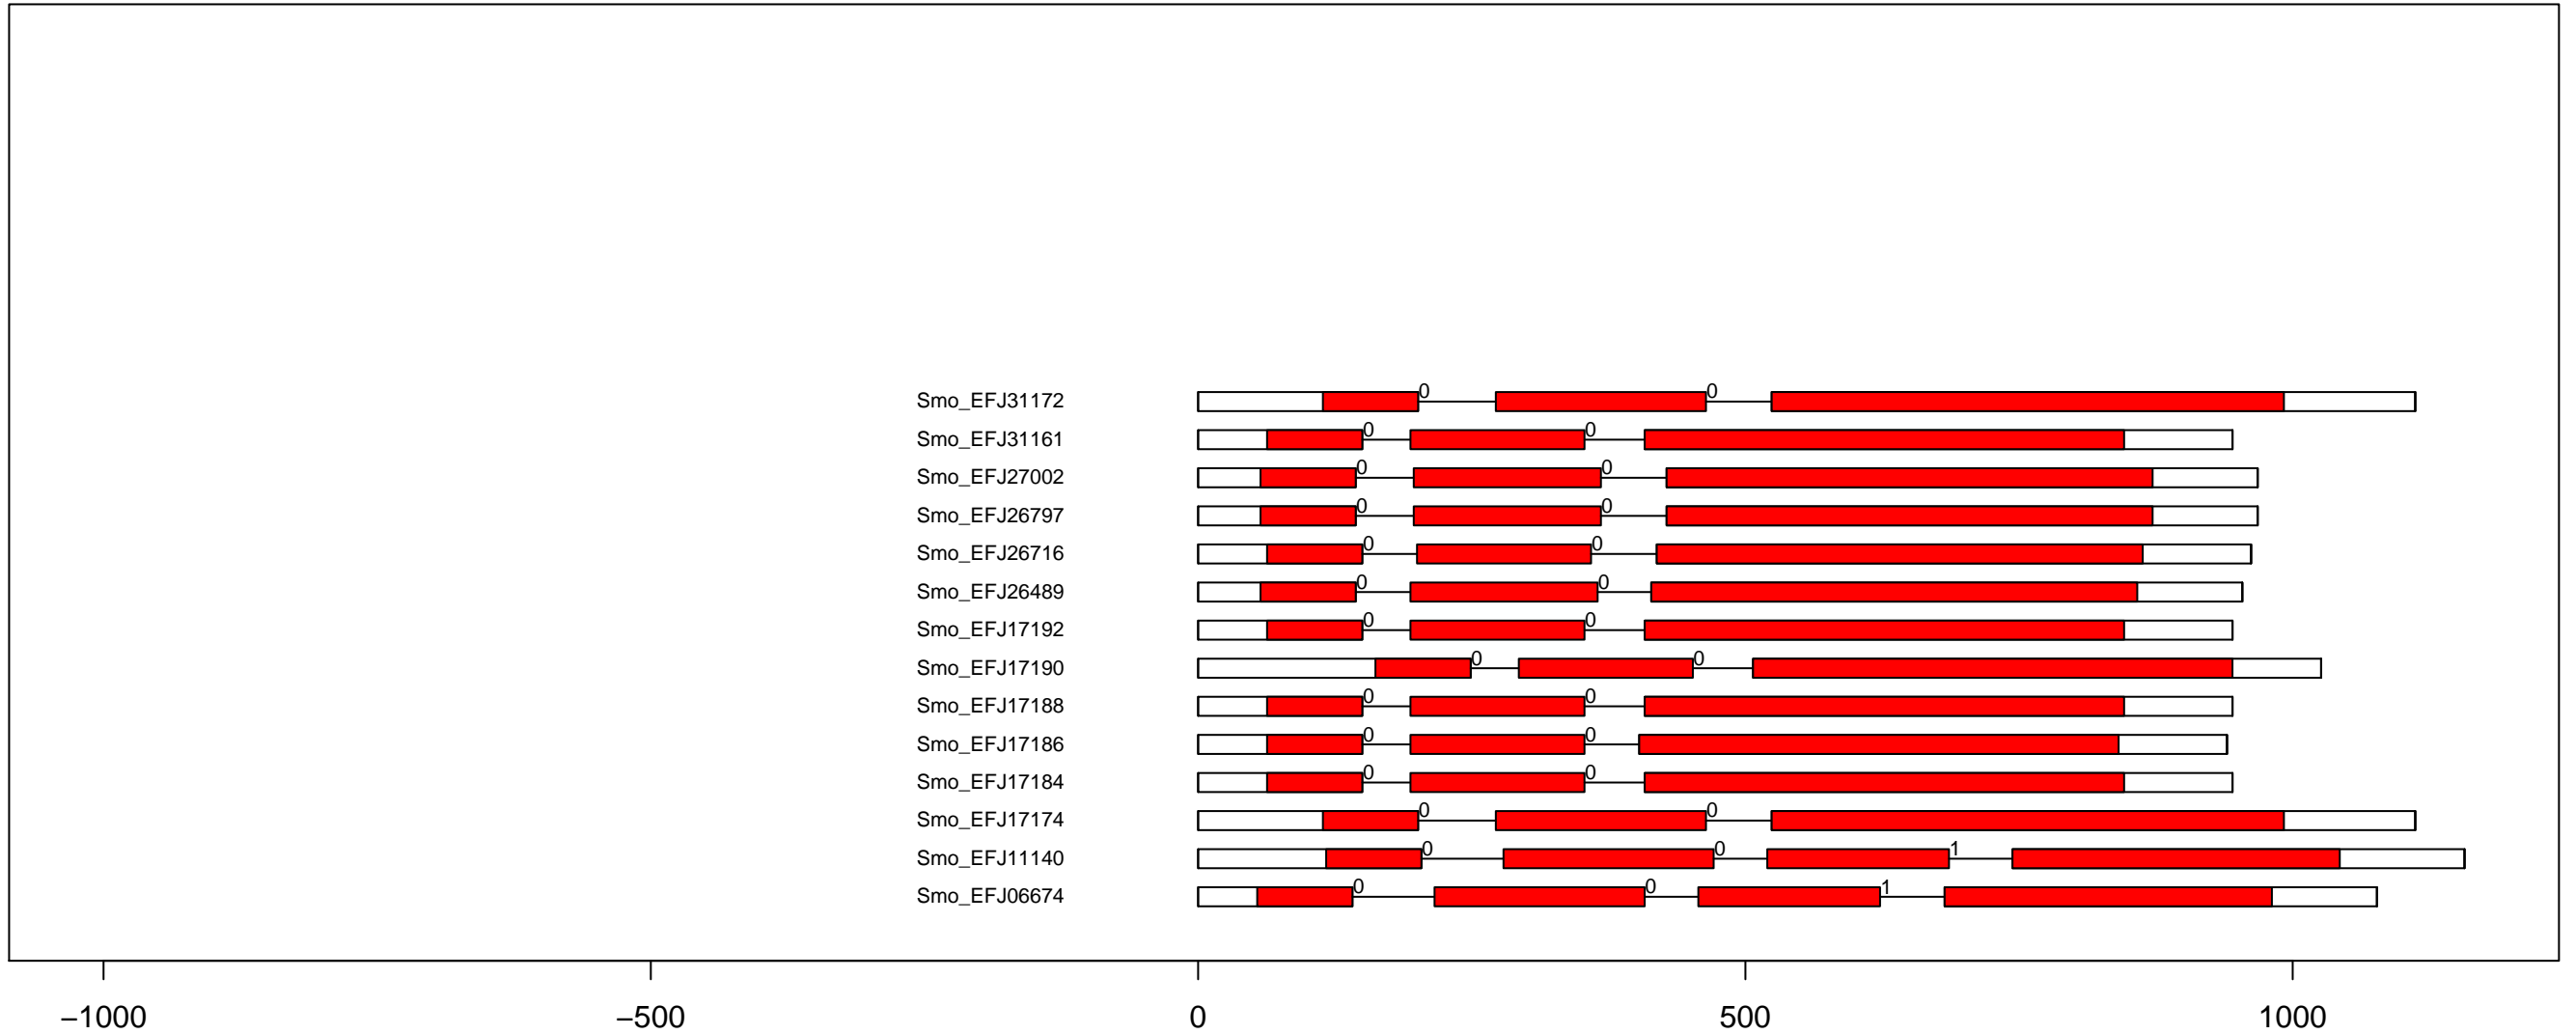

# S.mo class III peroxidase XVI subfamily exon-intron and prx domain diagram (all)

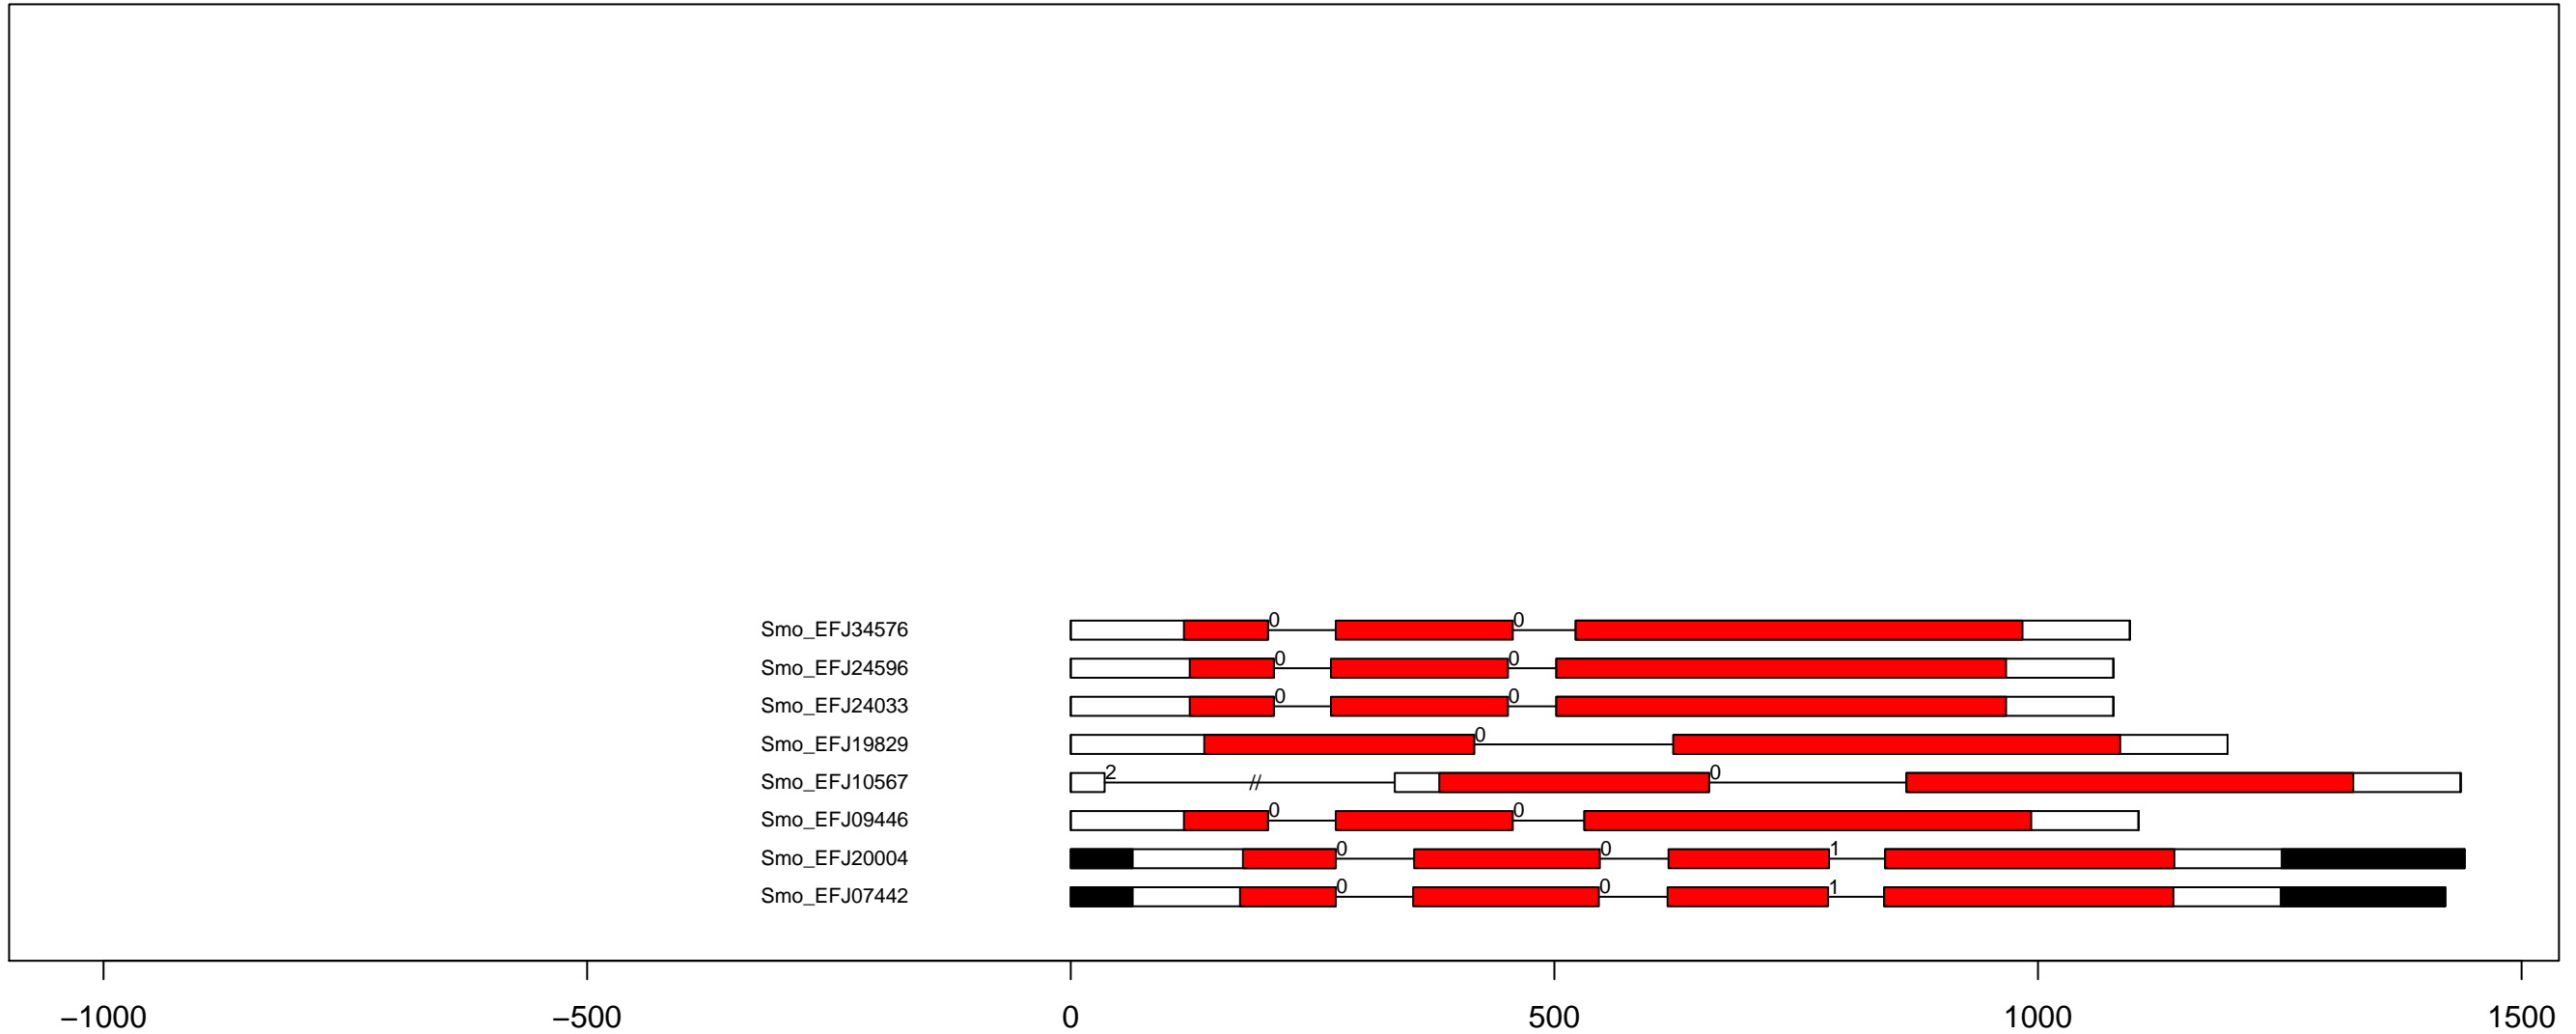

### S.mo class III peroxidase XVII subfamily exon-intron and prx domain diagram (all)

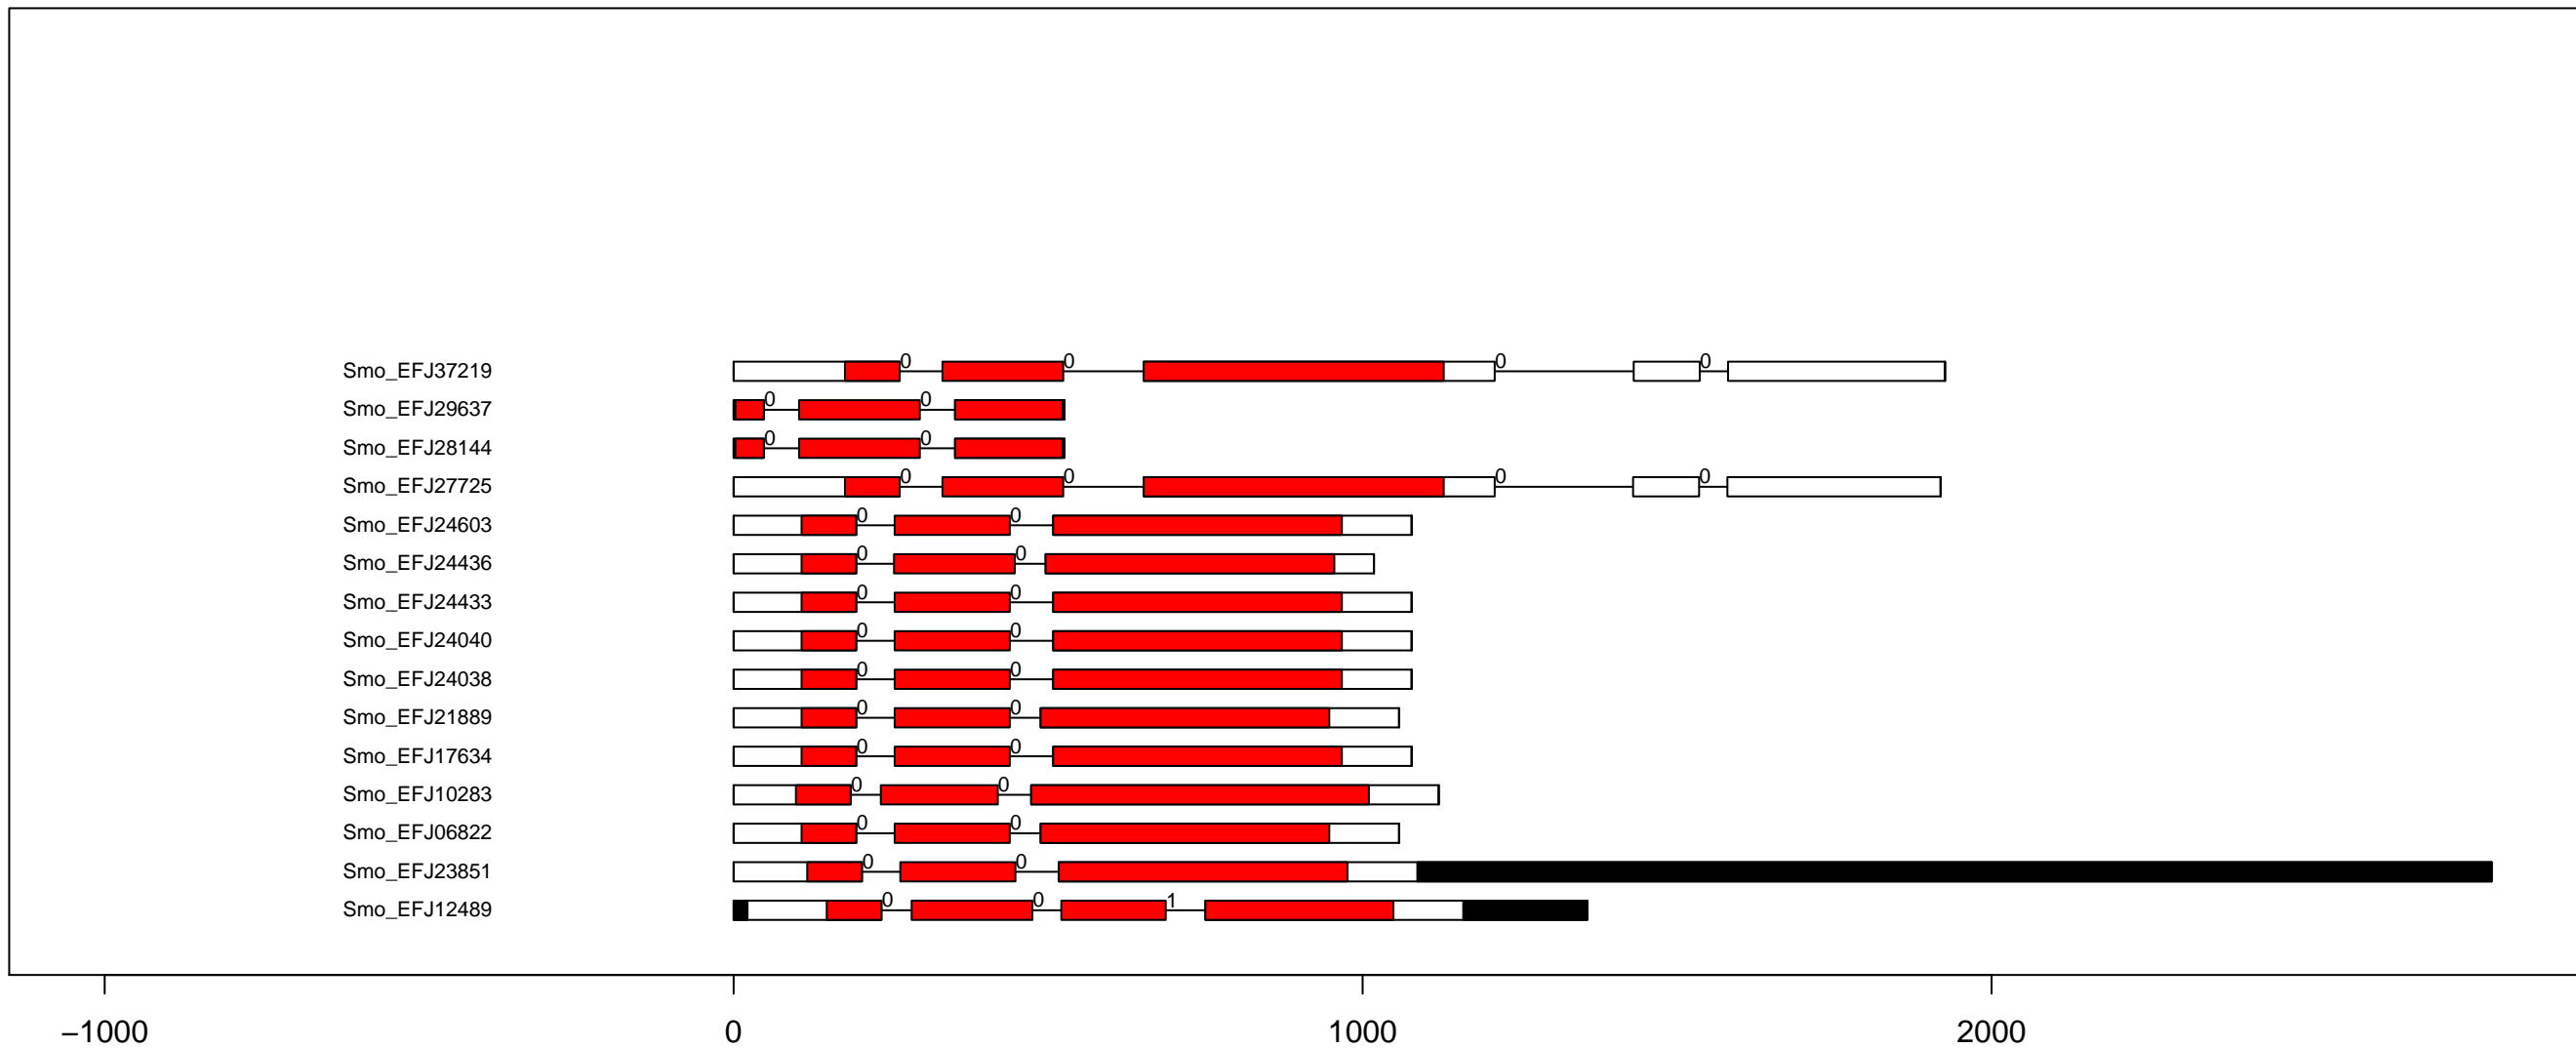

# S.mo class III peroxidase unclar\_classifications subfamily exon-intron and prx domain diagram (all)

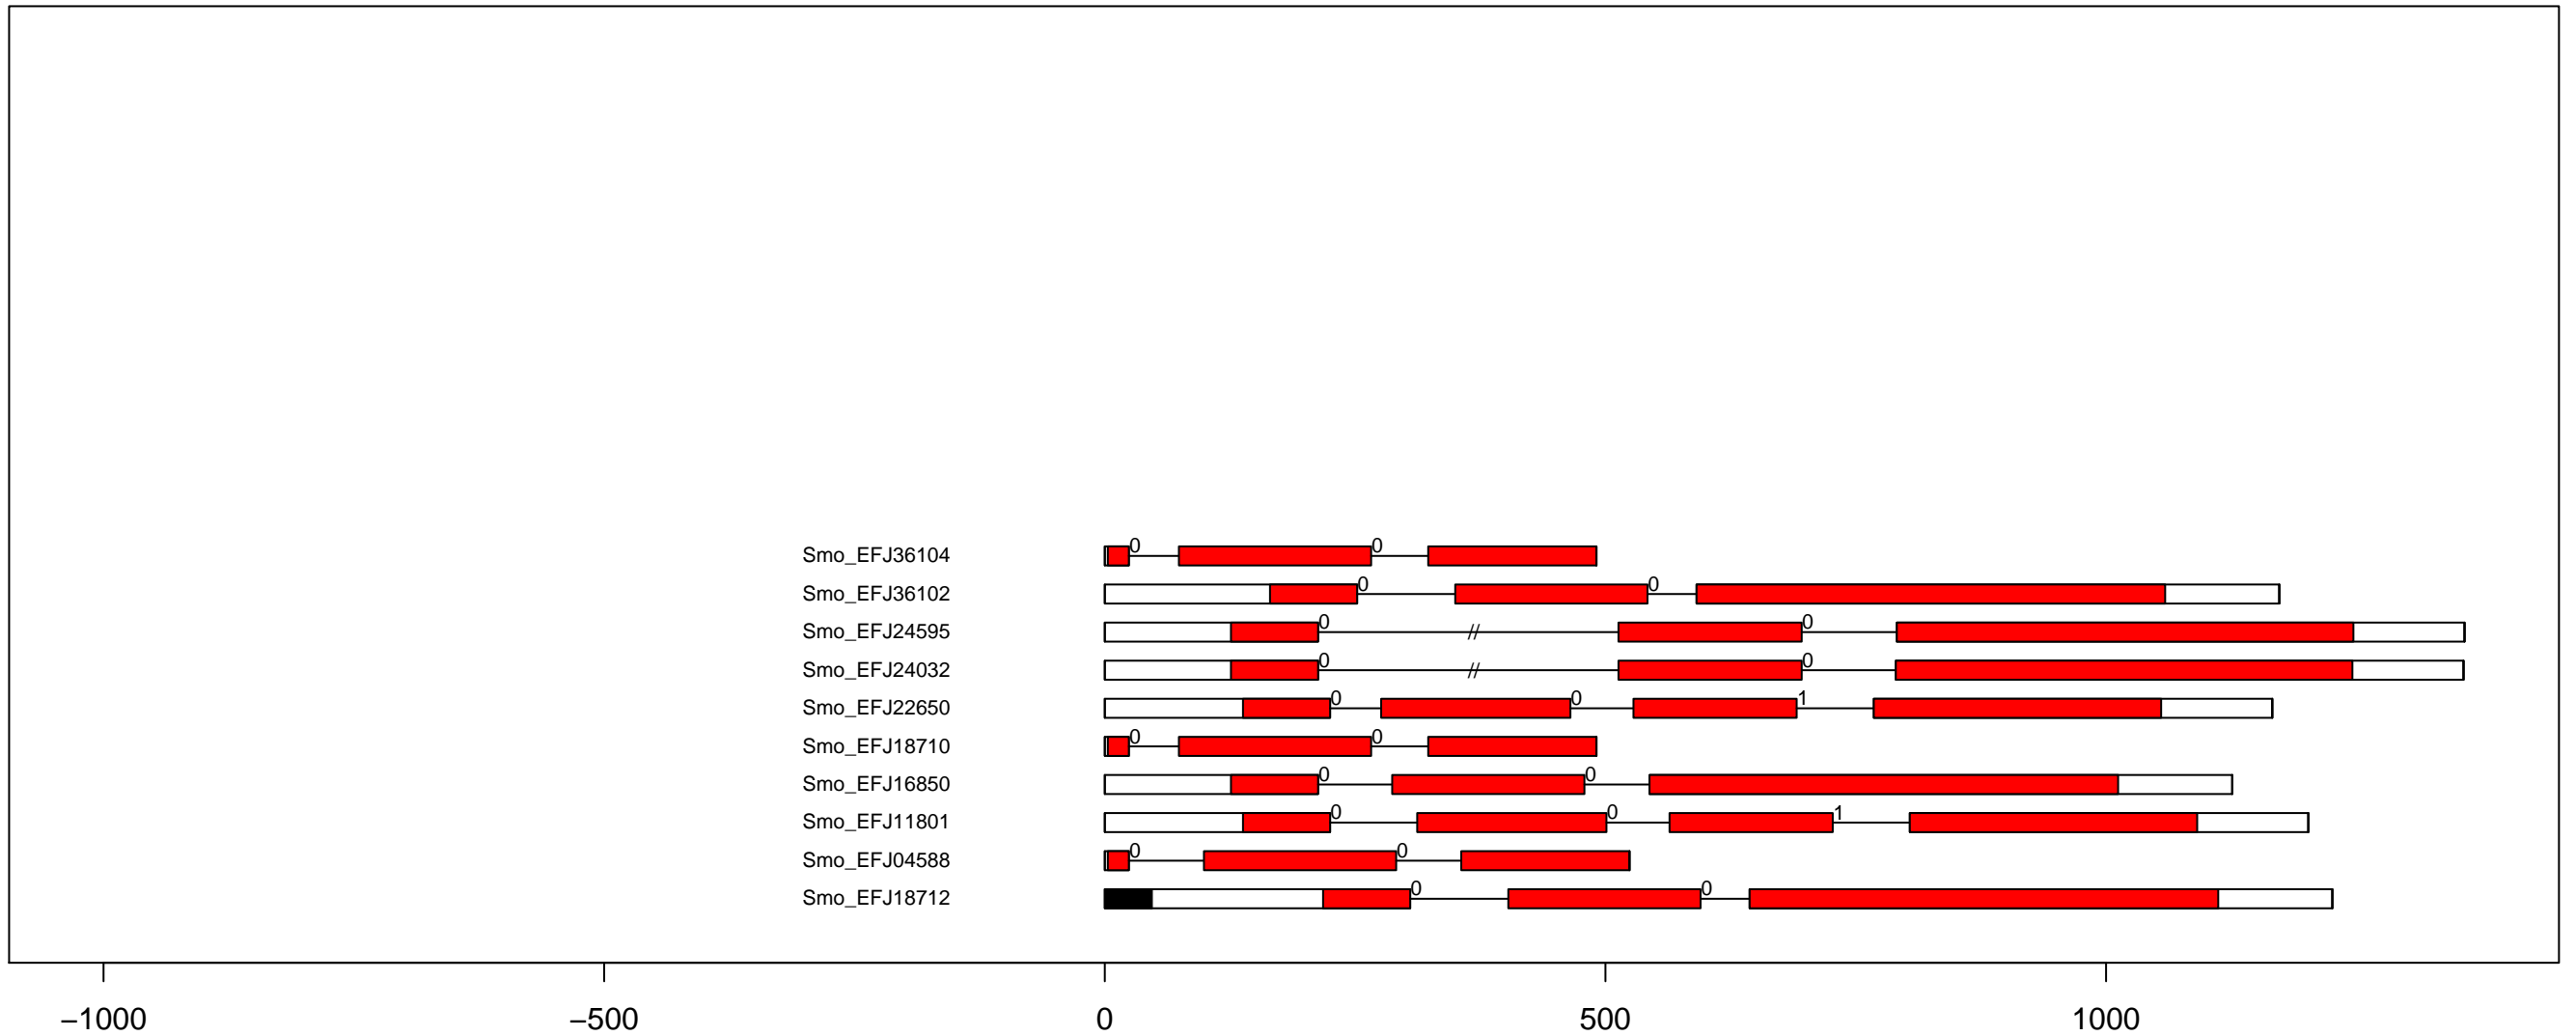

### P.pa class III peroxidase I subfamily exon-intron and prx domain diagram (part 1)

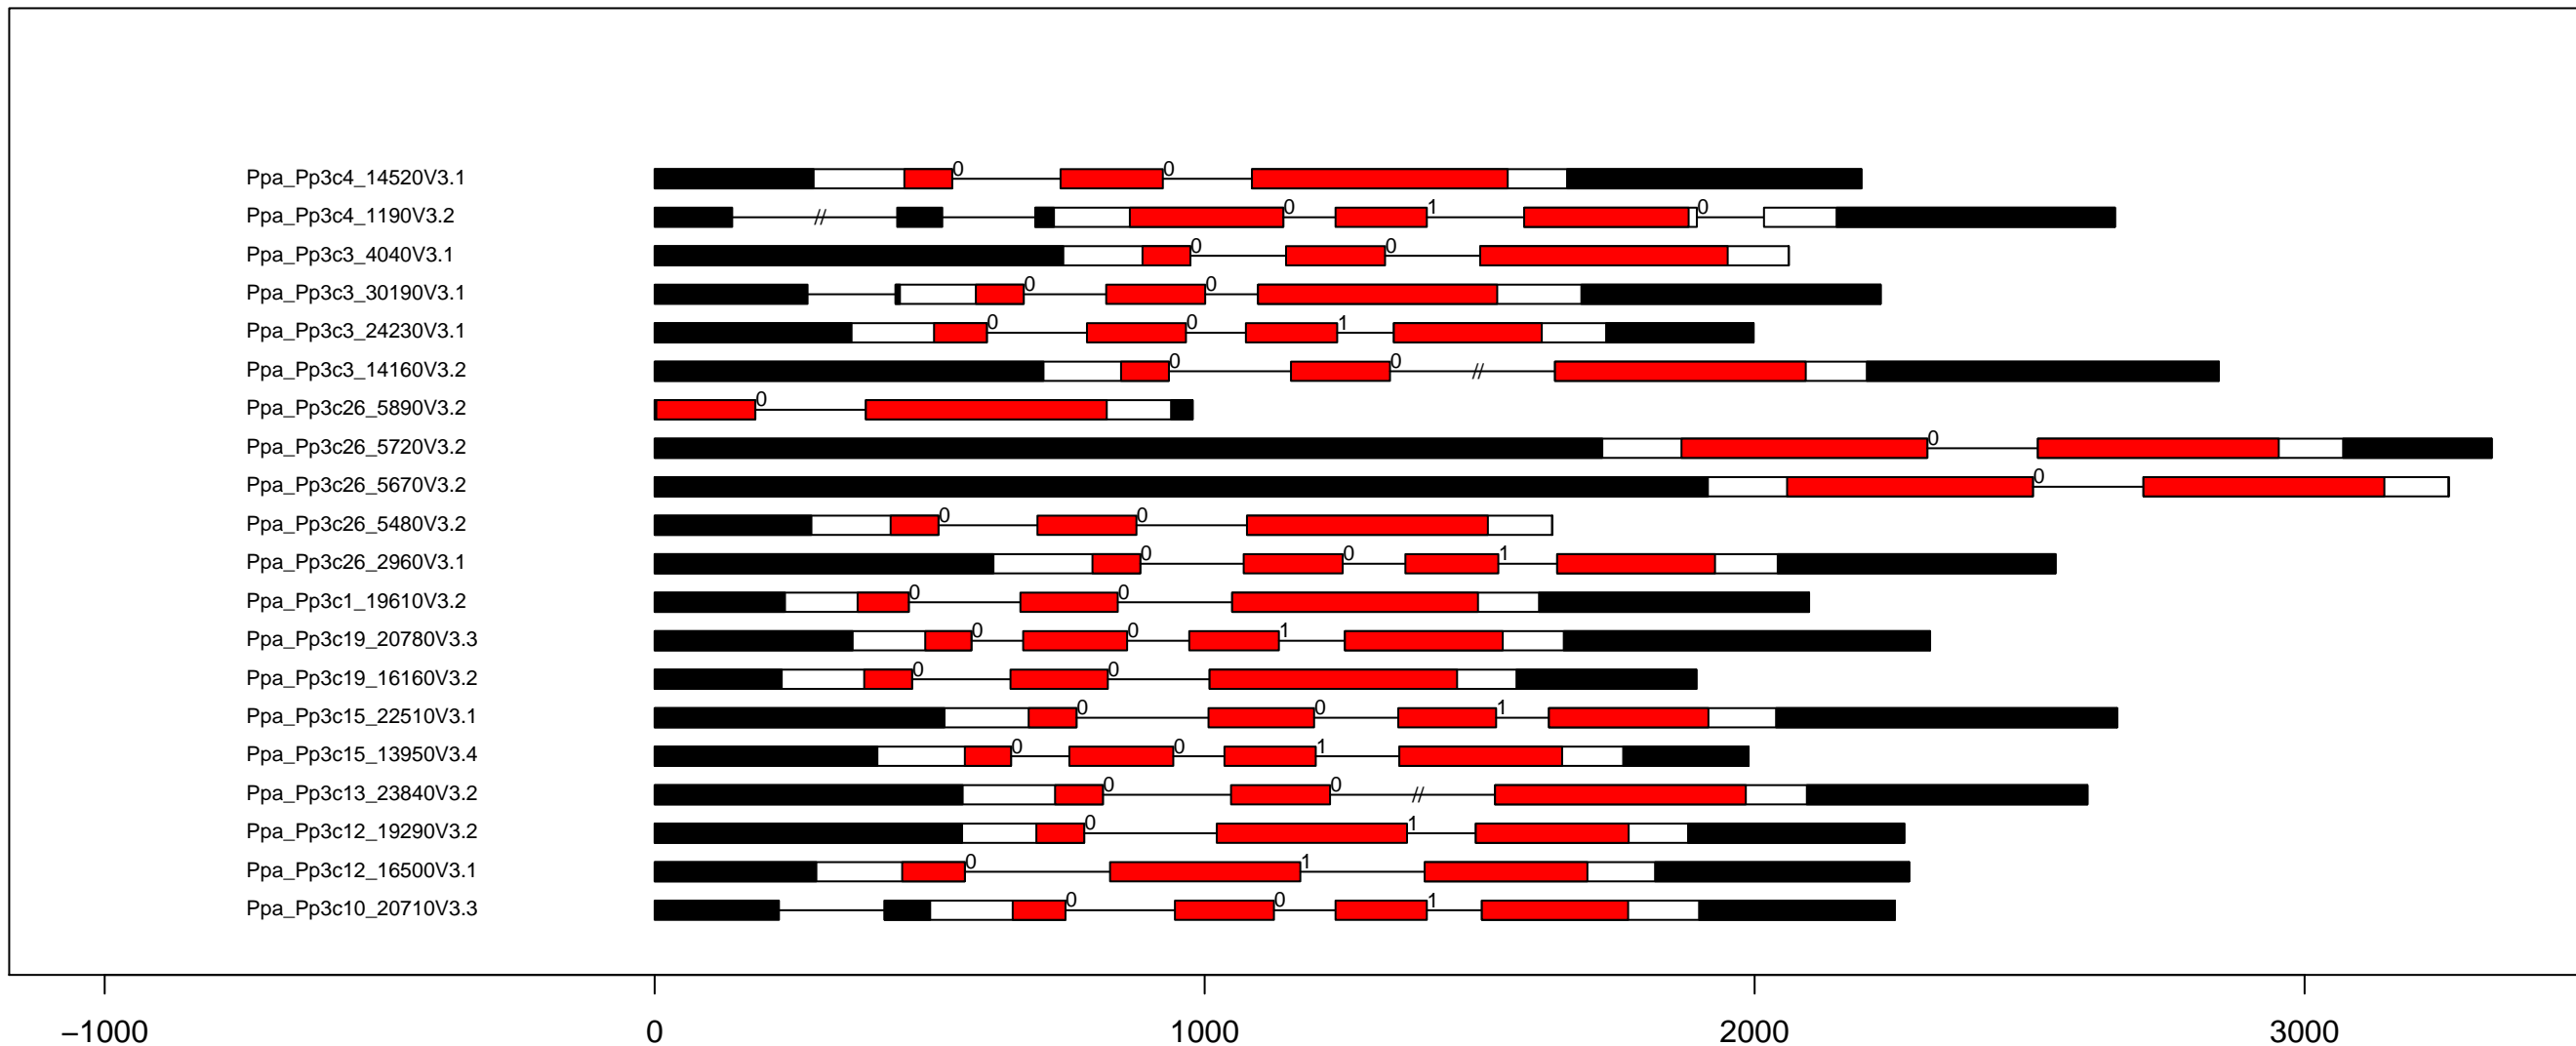

## P.pa class III peroxidase I subfamily exon-intron and prx domain diagram (part 2)

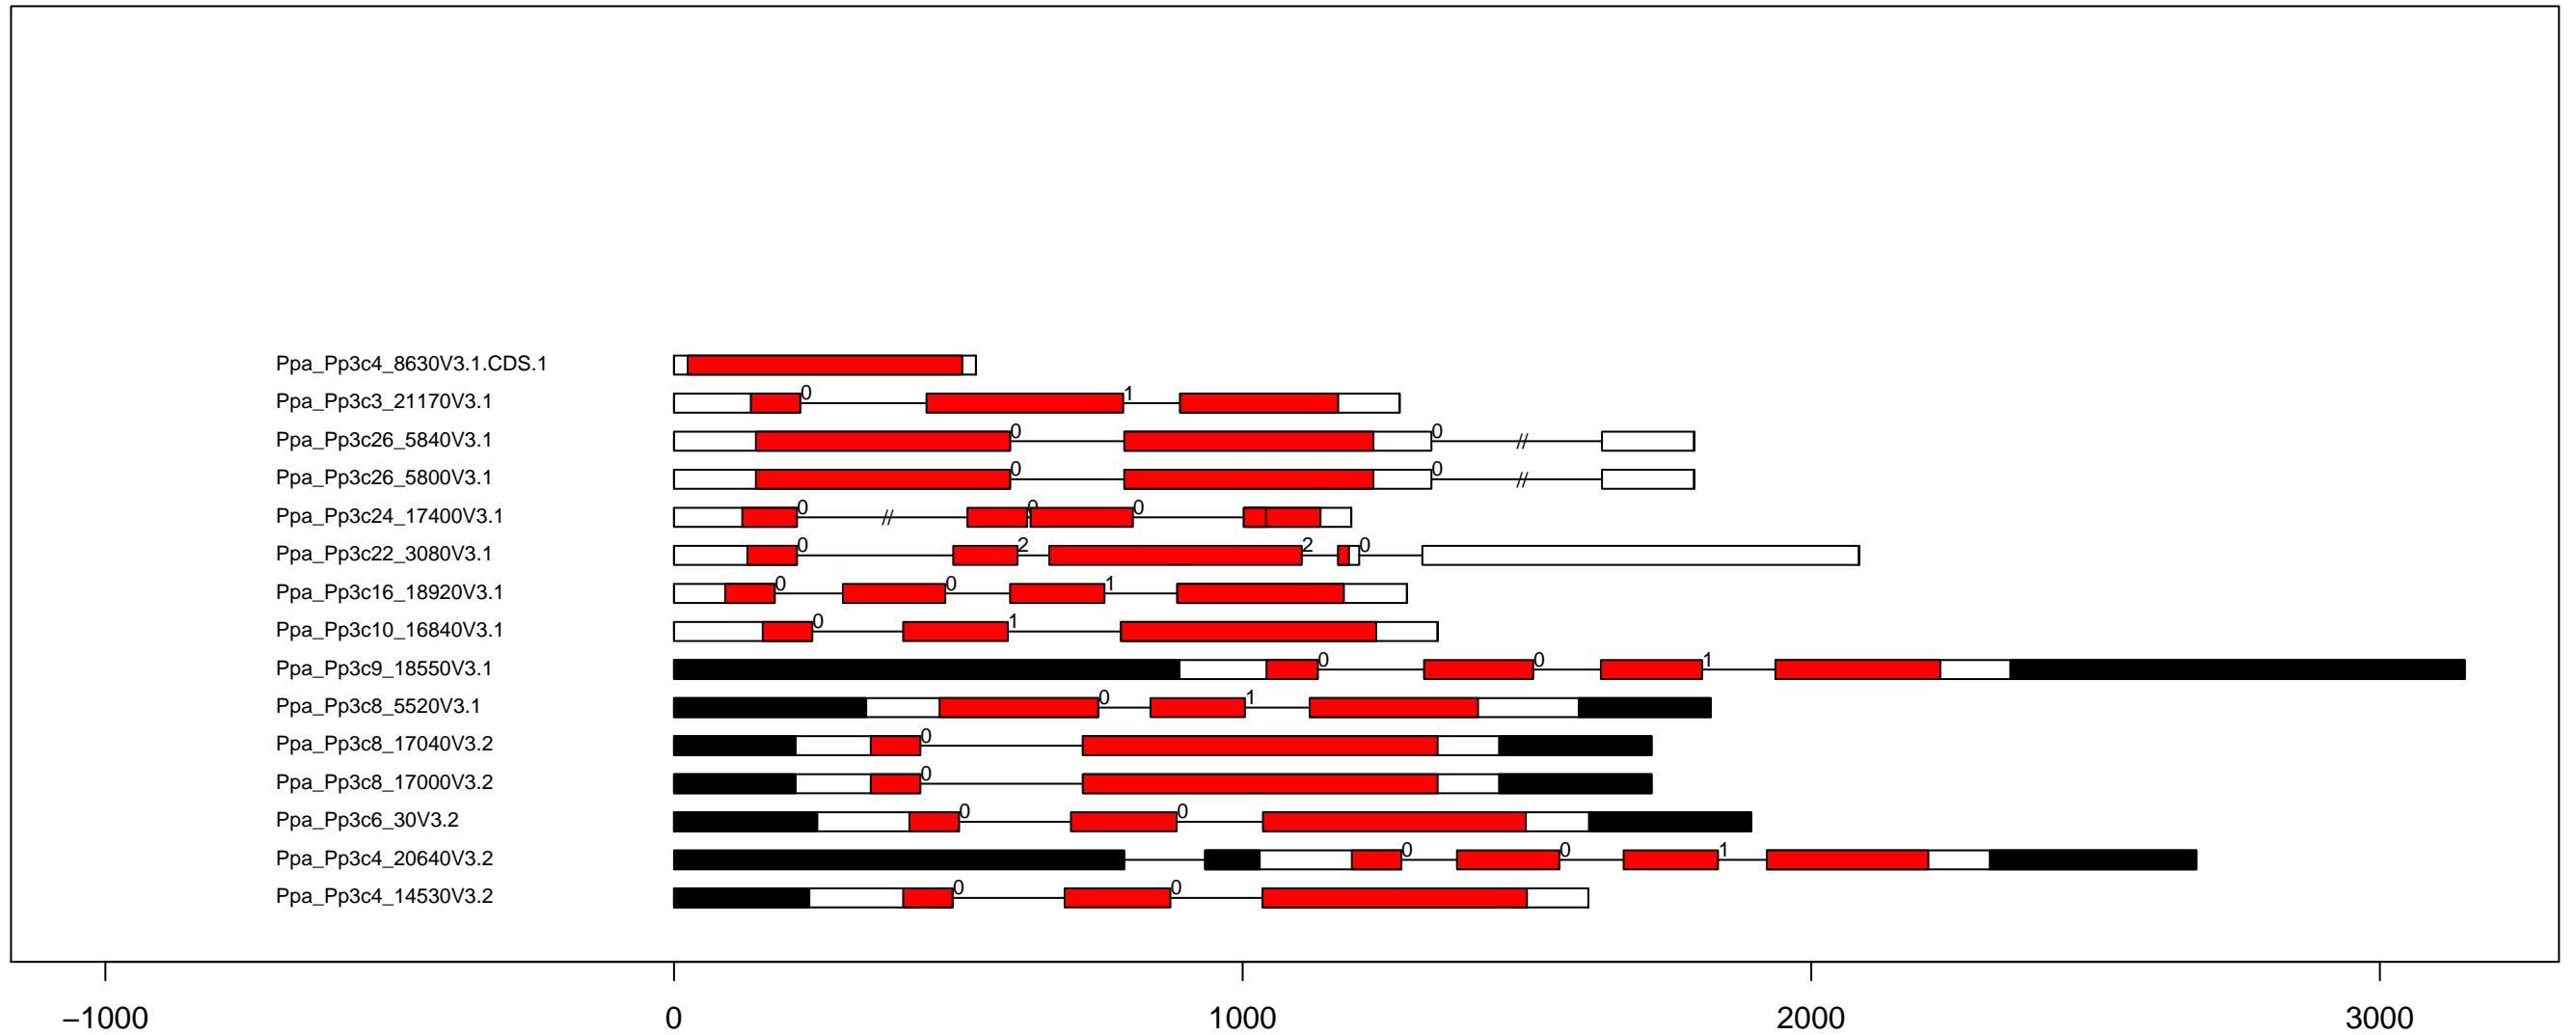

# P.pa class III peroxidase V subfamily exon-intron and prx domain diagram (all)

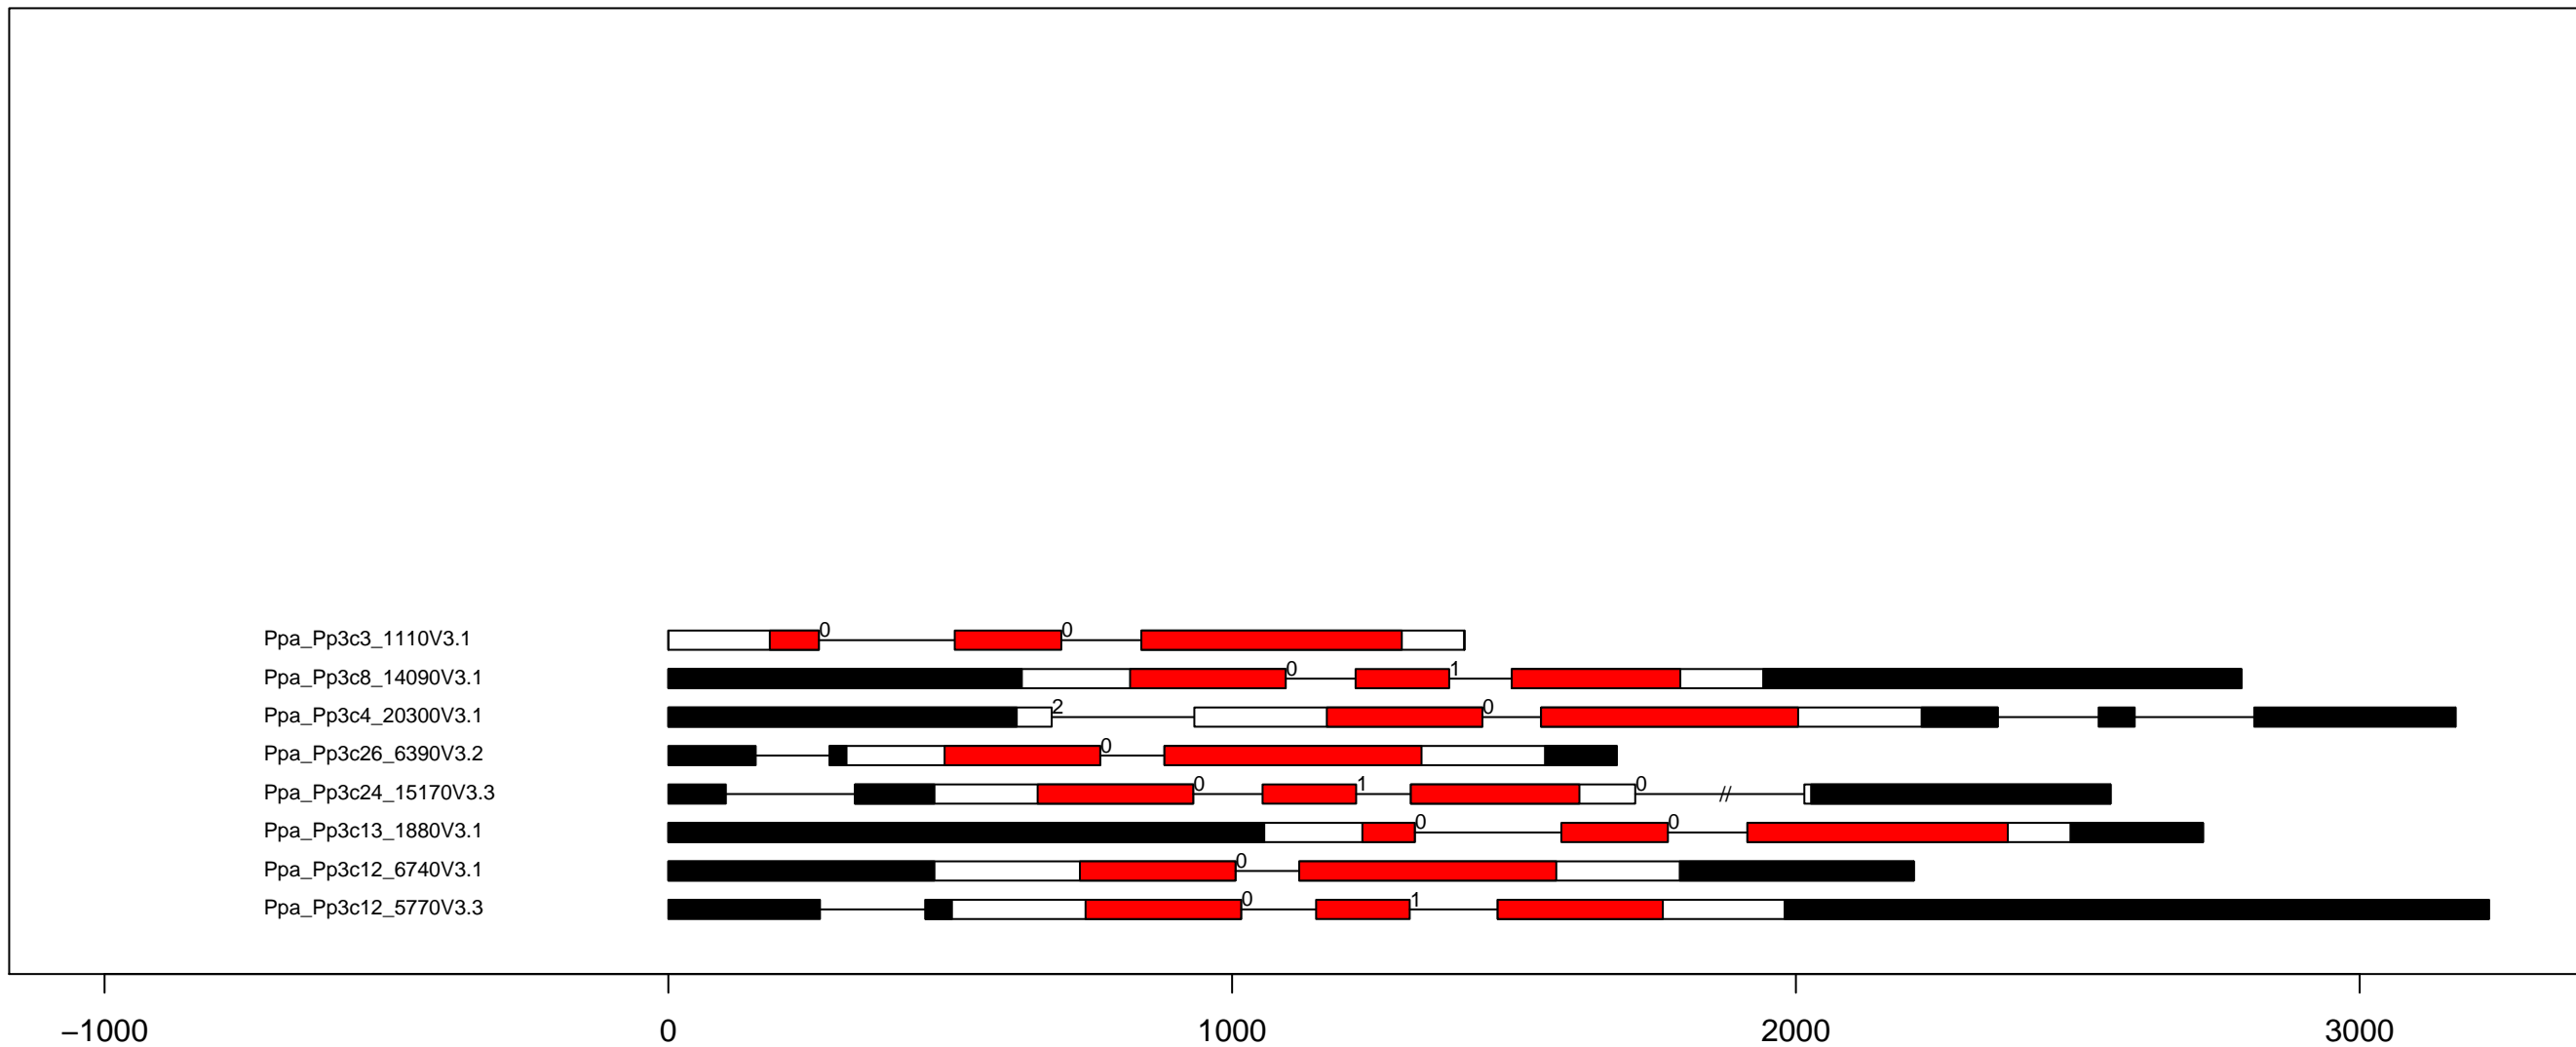

# P.pa class III peroxidase VII subfamily exon-intron and prx domain diagram (all)

Ppa\_Pp3c2\_15430V3.1  
 Ppa\_Pp3c20\_2100V3.7  
 Ppa\_Pp3c20\_2050V3.1  
 Ppa\_Pp3c1\_40650V3.1  
 Ppa\_Pp3c1\_26270V3.1  
 Ppa\_Pp3c1\_18860V3.3

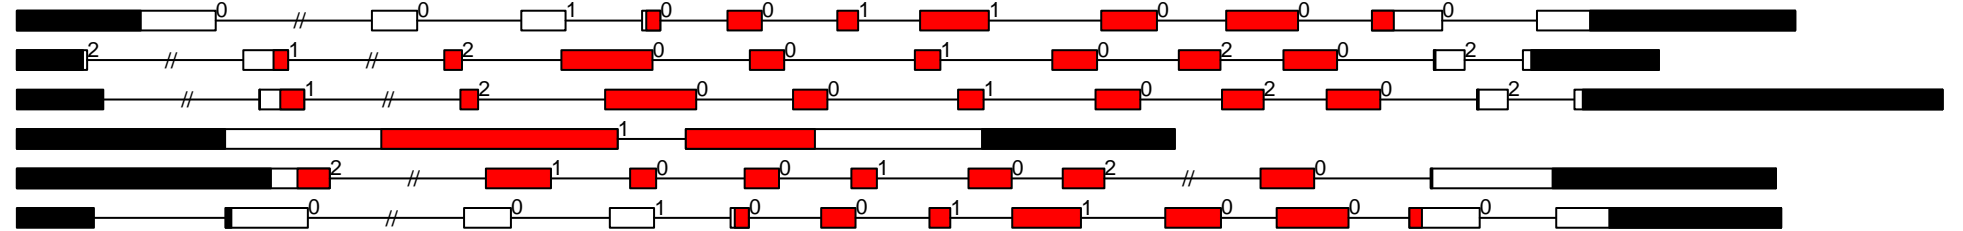

-1000

0

1000

2000

3000



# P.pa class III peroxidase IX subfamily exon-intron and prx domain diagram (all)

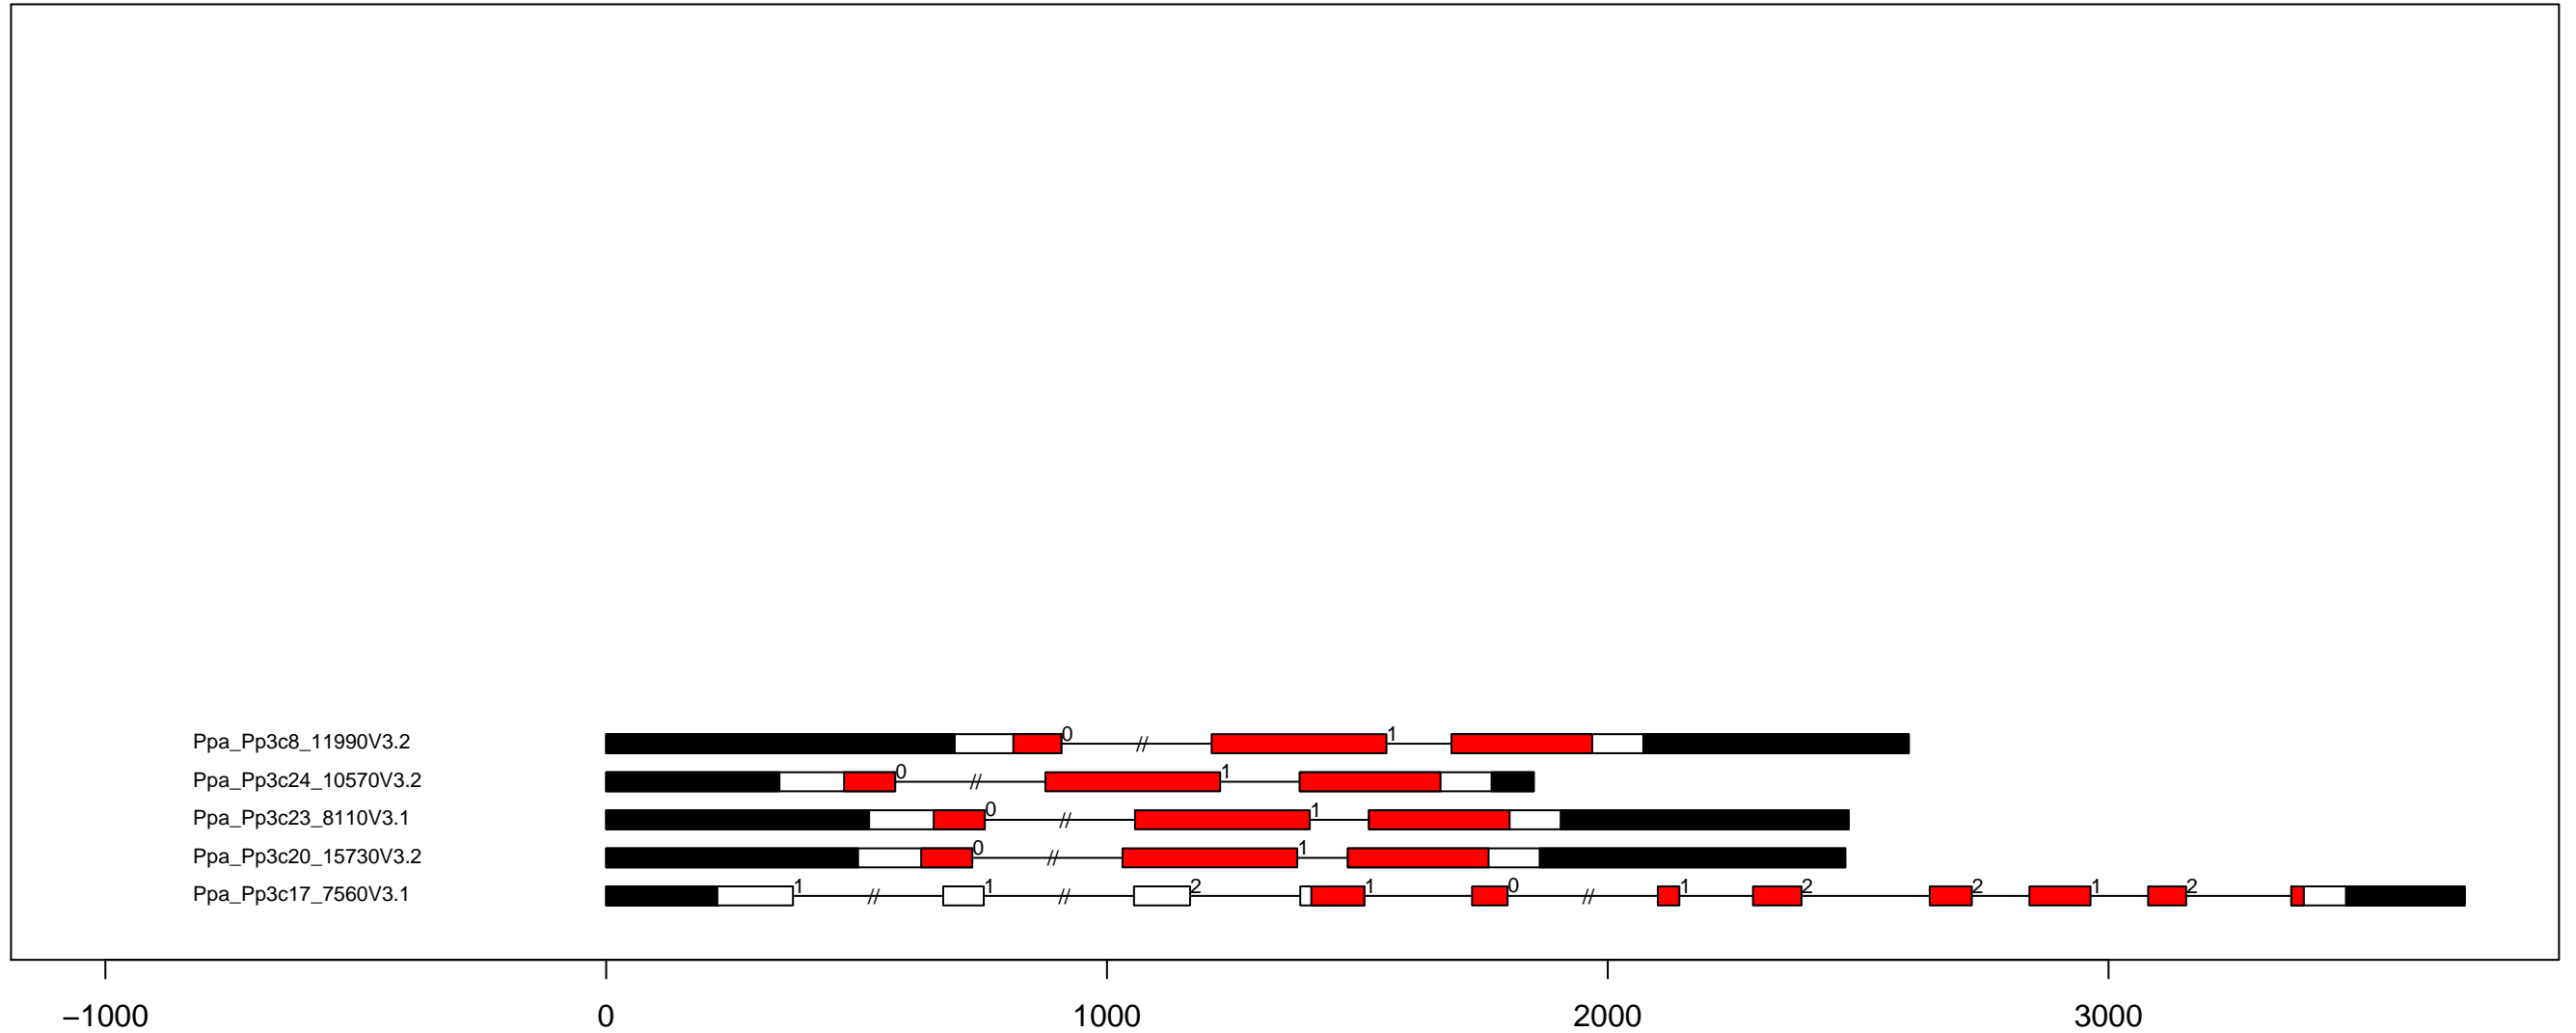

# P.pa class III peroxidase XIV subfamily exon-intron and prx domain diagram (all)

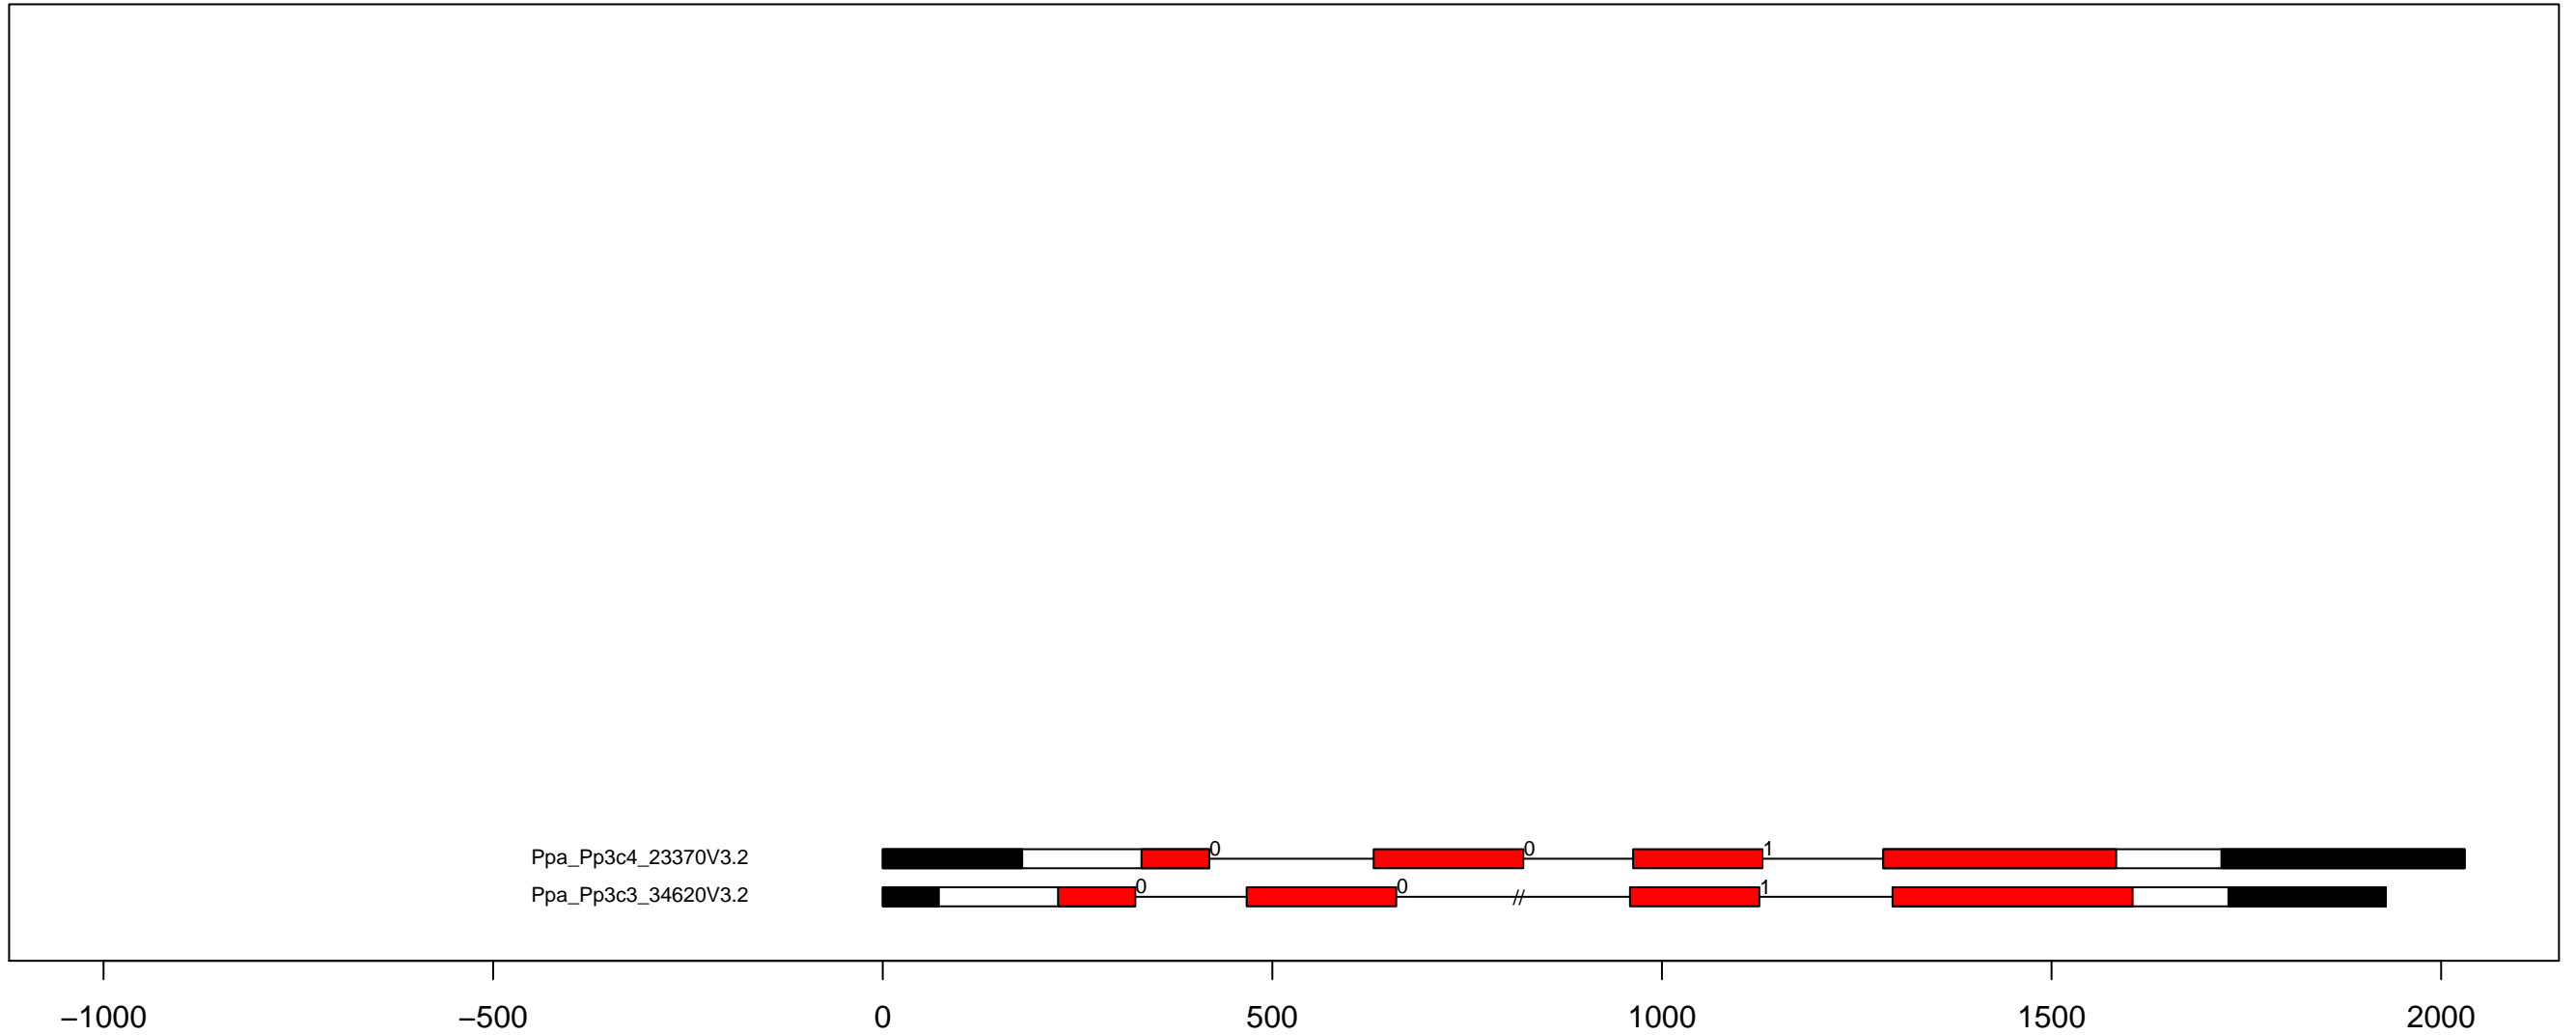

# P.pa class III peroxidase XV subfamily exon-intron and prx domain diagram (all)

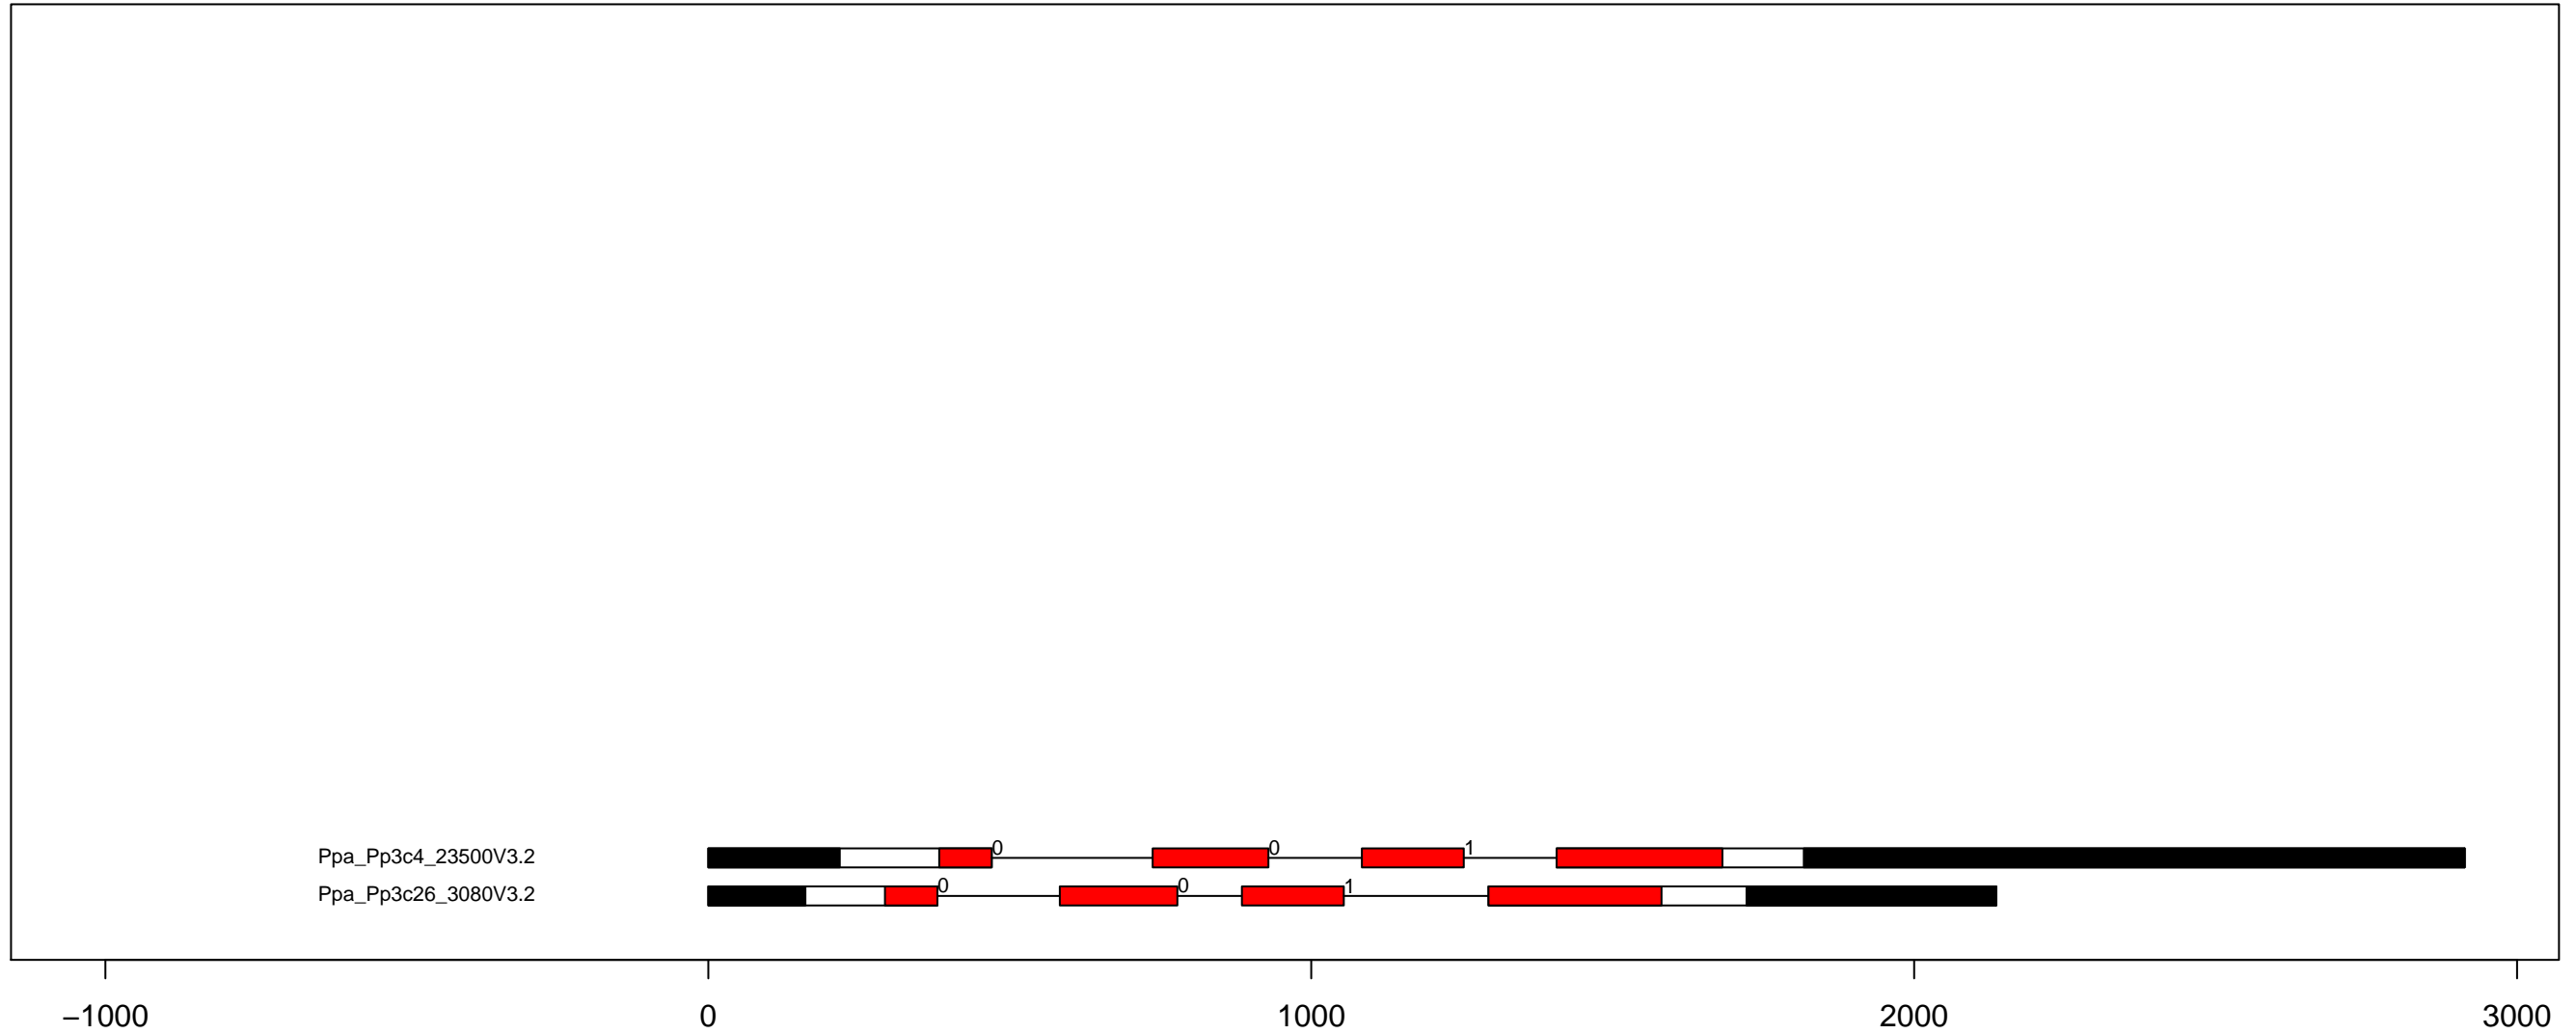



### C.re class III peroxidase VII subfamily exon-intron and prx domain diagram (all)

Cre\_PNW88818  
Cre\_PNW86470  
Cre\_PNW83243  
Cre\_PNW80850  
Cre\_PNW80827  
Cre\_PNW79135

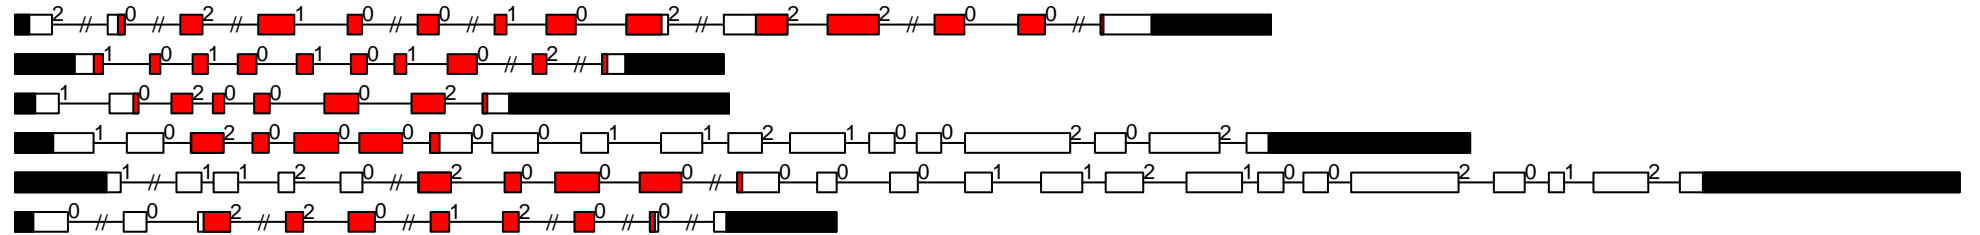

# C.re class III peroxidase IX subfamily exon-intron and prx domain diagram (all)

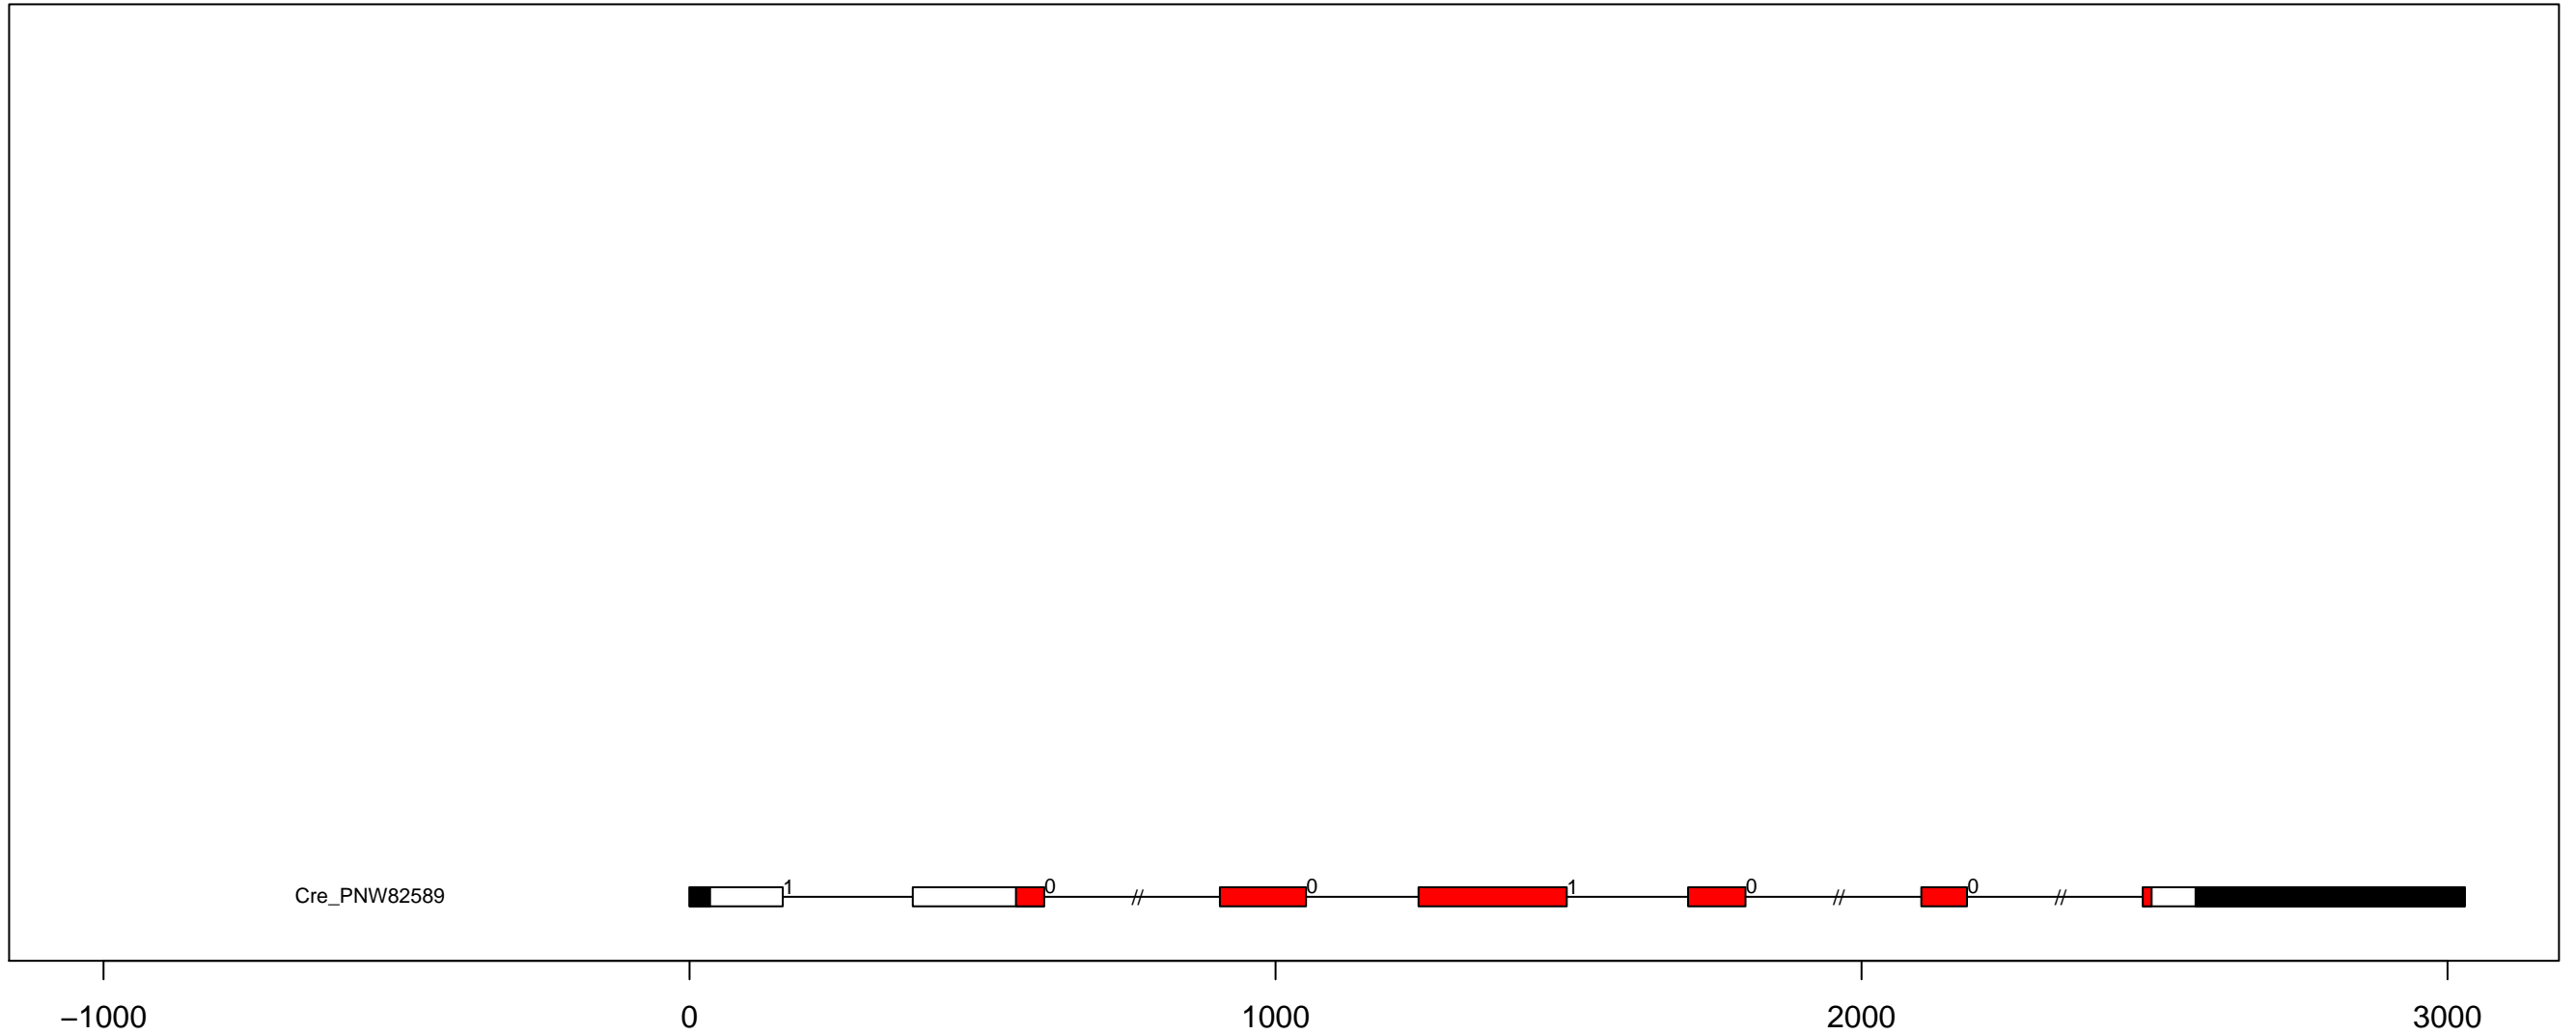

Supplement: 12870_2020_2602_MOESM5_ESM.pdf [file 12870_2020_2602_MOESM5_ESM.pdf]
