# Supplementary material for: A member of wheat class III peroxidase gene family, TaPRX-2A, enhanced the tolerance of salt stress
Source: PubMed Central journal article supplement (PMC7449071; doi:10.1186/s12870-020-02602-1), 2020-08-26

a

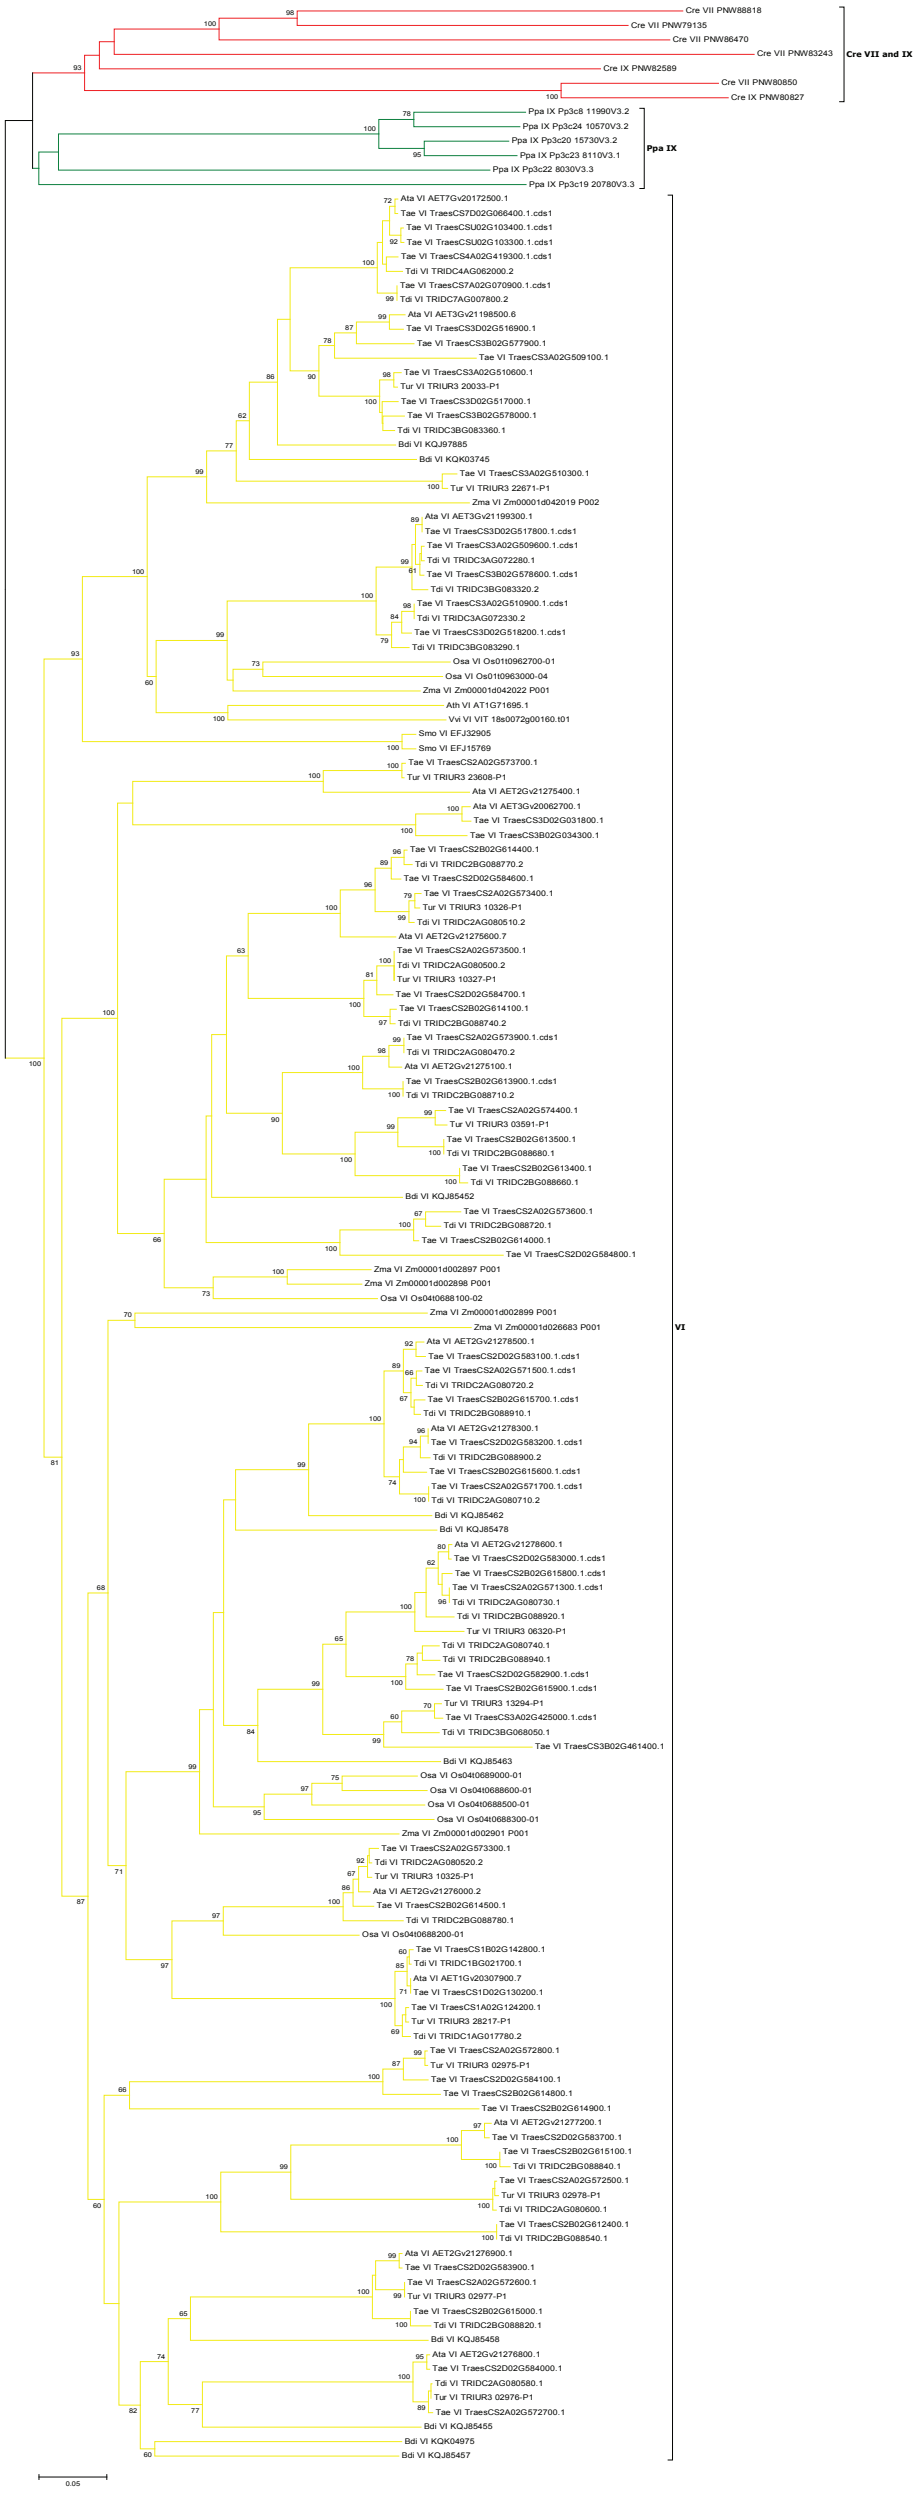

Supplement: 12870_2020_2602_MOESM4_ESM.pdf [file 12870_2020_2602_MOESM4_ESM.pdf]
