# Supplementary material for: A member of wheat class III peroxidase gene family, TaPRX-2A, enhanced the tolerance of salt stress
Source: PubMed Central journal article supplement (PMC7449071; doi:10.1186/s12870-020-02602-1), 2020-08-26

# a

## Positively selected sites and inferred ancestral sequences by M2a model of PAML

Naive Empirical Bayes (NEB) analysis  
Bayes Empirical Bayes (BEB) analysis  
Positively selected sites (\*: P>95%; \*\*: P>99%)  
(amino acids refer to 1st sequence: EFJ32905)

|       | Pr(w>1) | post mean +- SE for w |
|-------|---------|-----------------------|
| 95 E  | 0.583   | 2.890 +- 2.403        |
| 185 K | 0.558   | 2.760 +- 2.335        |

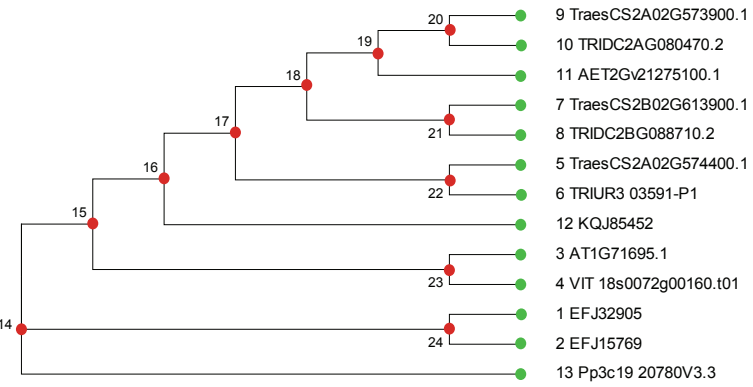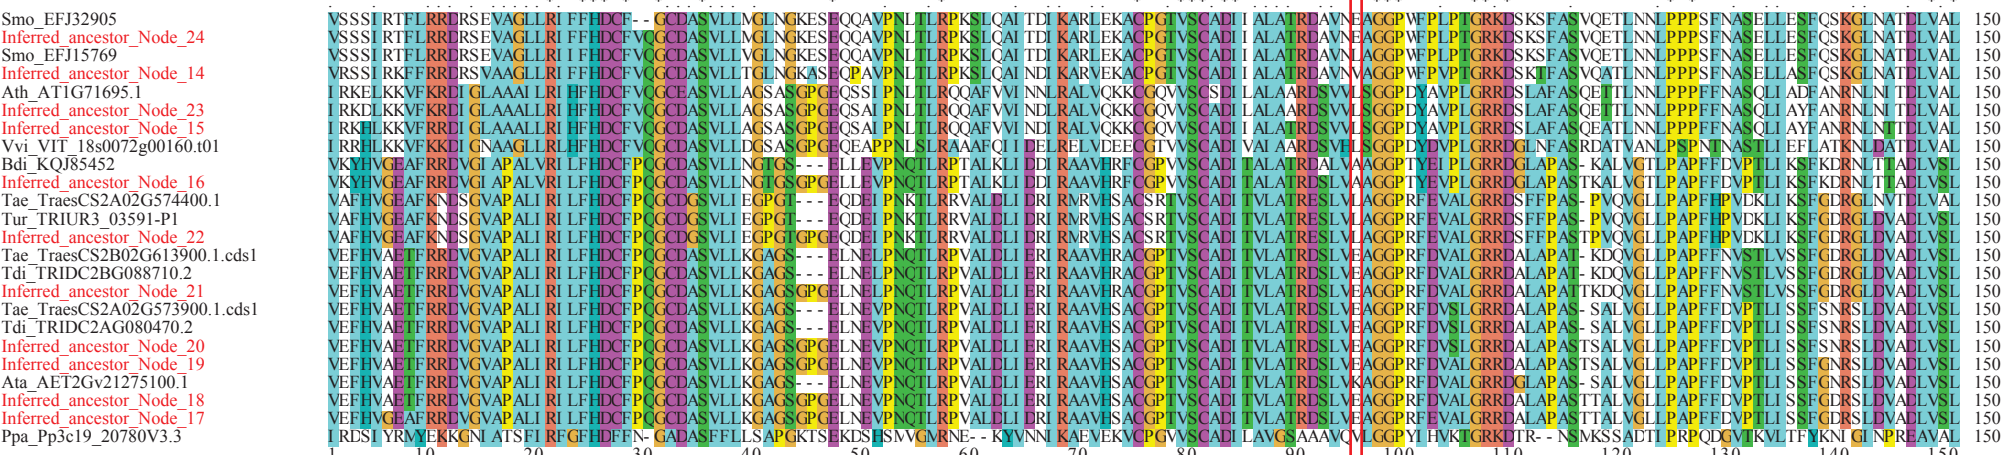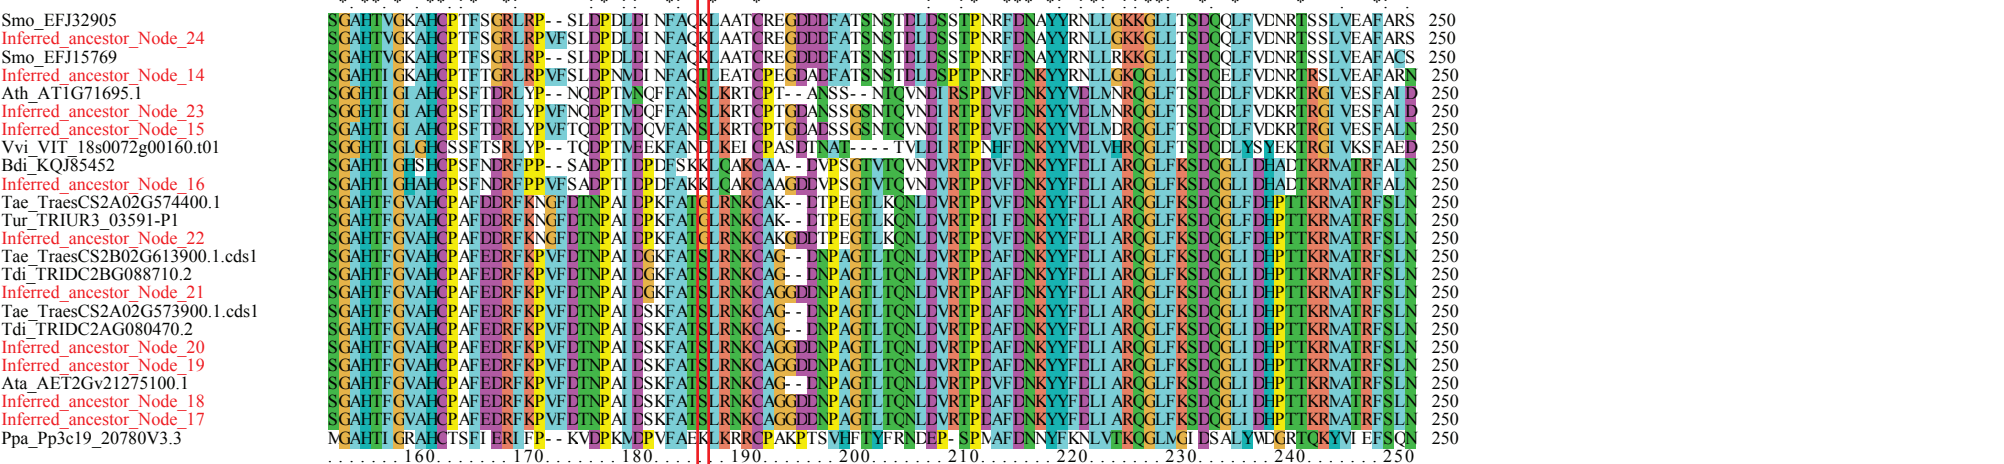

**b**

## Positively selected sites and inferred ancestral sequences by M8 model of PAML

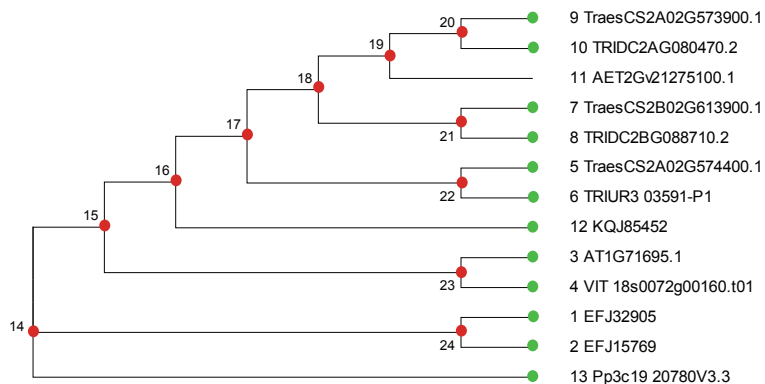

Naive Empirical Bayes (NEB) analysis  
 Bayes Empirical Bayes (BEB) analysis  
 Positively selected sites (\*: P>95%; \*\*: P>99%)  
 (amino acids refer to 1st sequence: EFJ32905)

|       | Pr(w>1) | post mean +- SE for w |
|-------|---------|-----------------------|
| 95 E  | 0.843   | 2.107 +- 1.258        |
| 110 S | 0.531   | 1.427 +- 1.021        |
| 117 Q | 0.665   | 1.798 +- 1.321        |
| 135 E | 0.608   | 1.538 +- 1.007        |
| 185 K | 0.867   | 2.131 +- 1.237        |
| 212 R | 0.704   | 1.842 +- 1.248        |

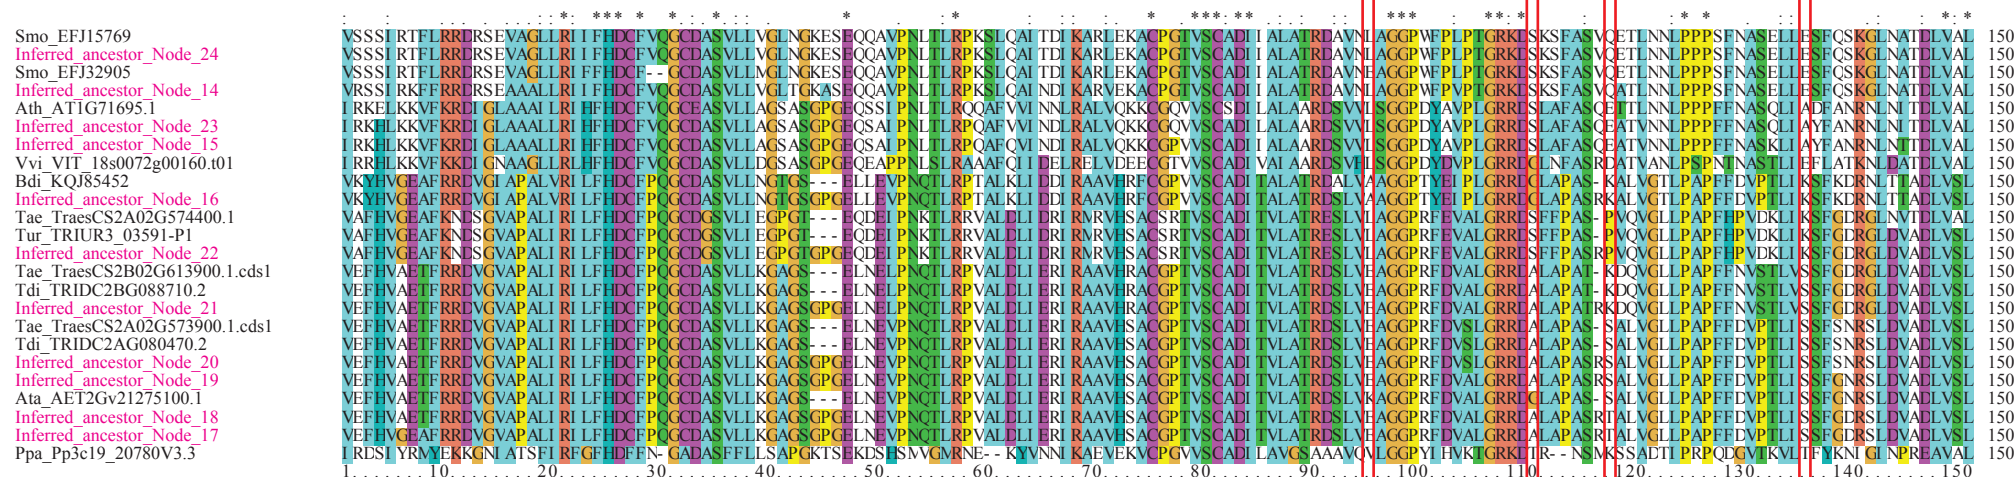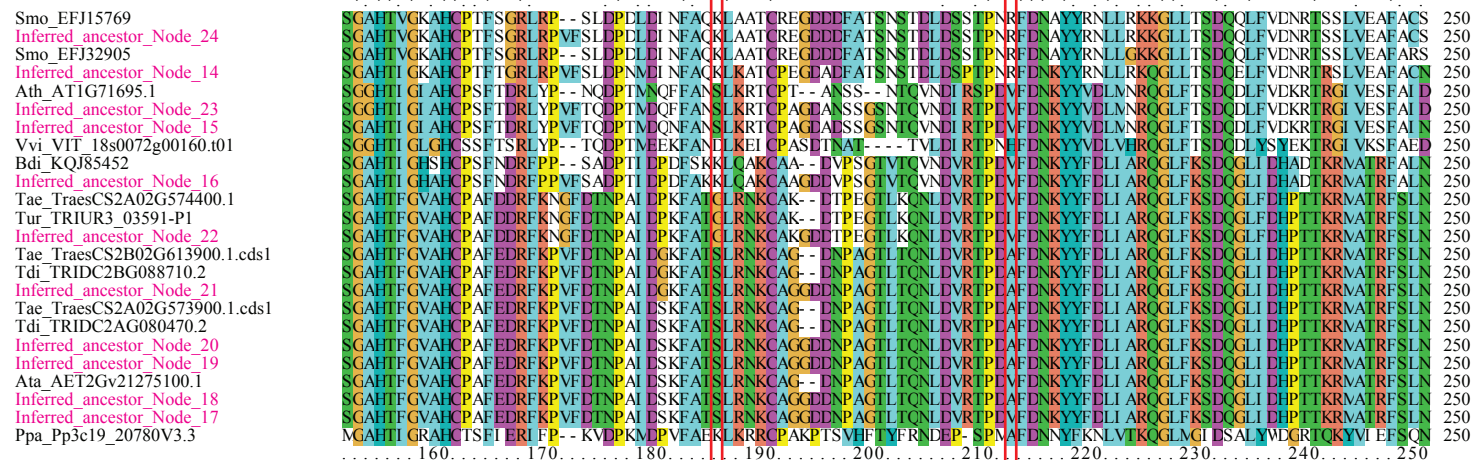

# C

## Inferred ancestral sequences by MEGAX

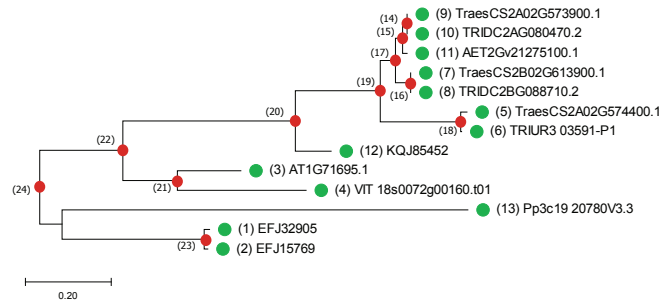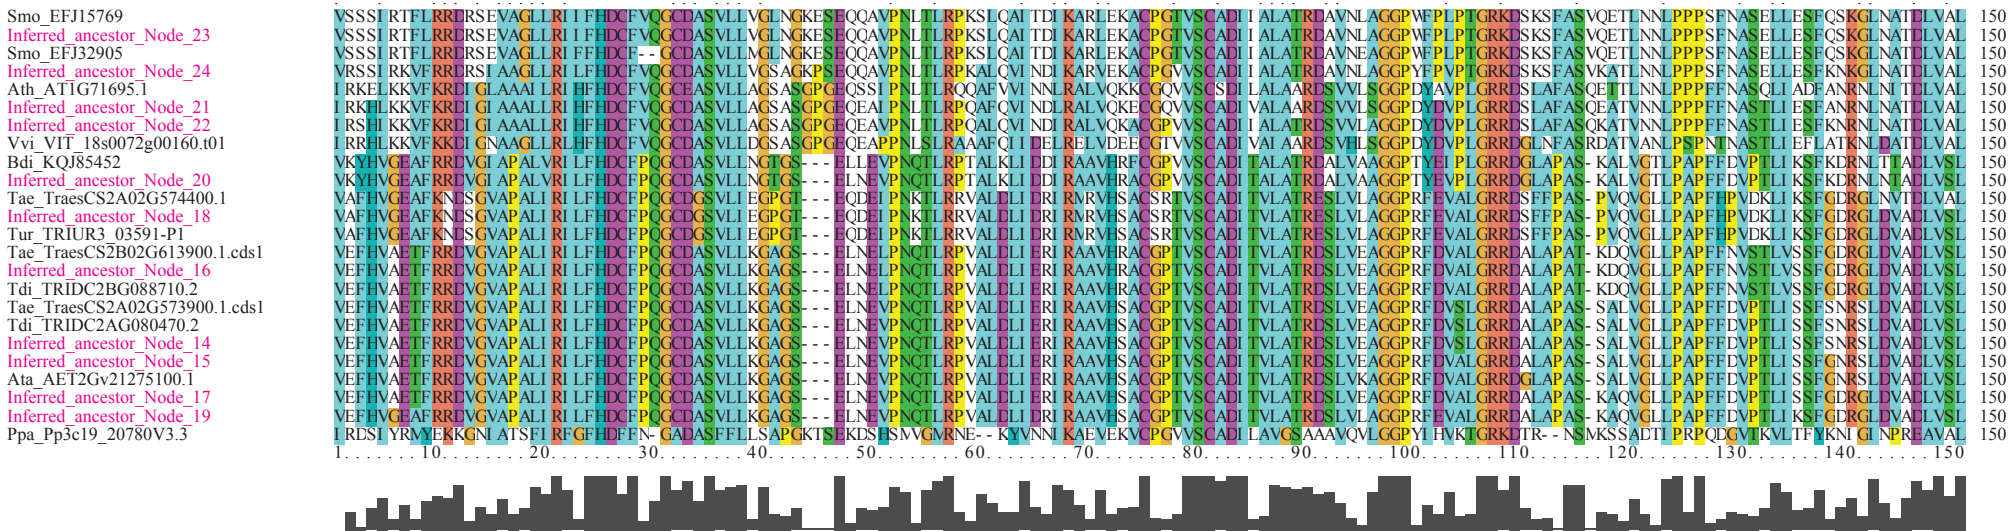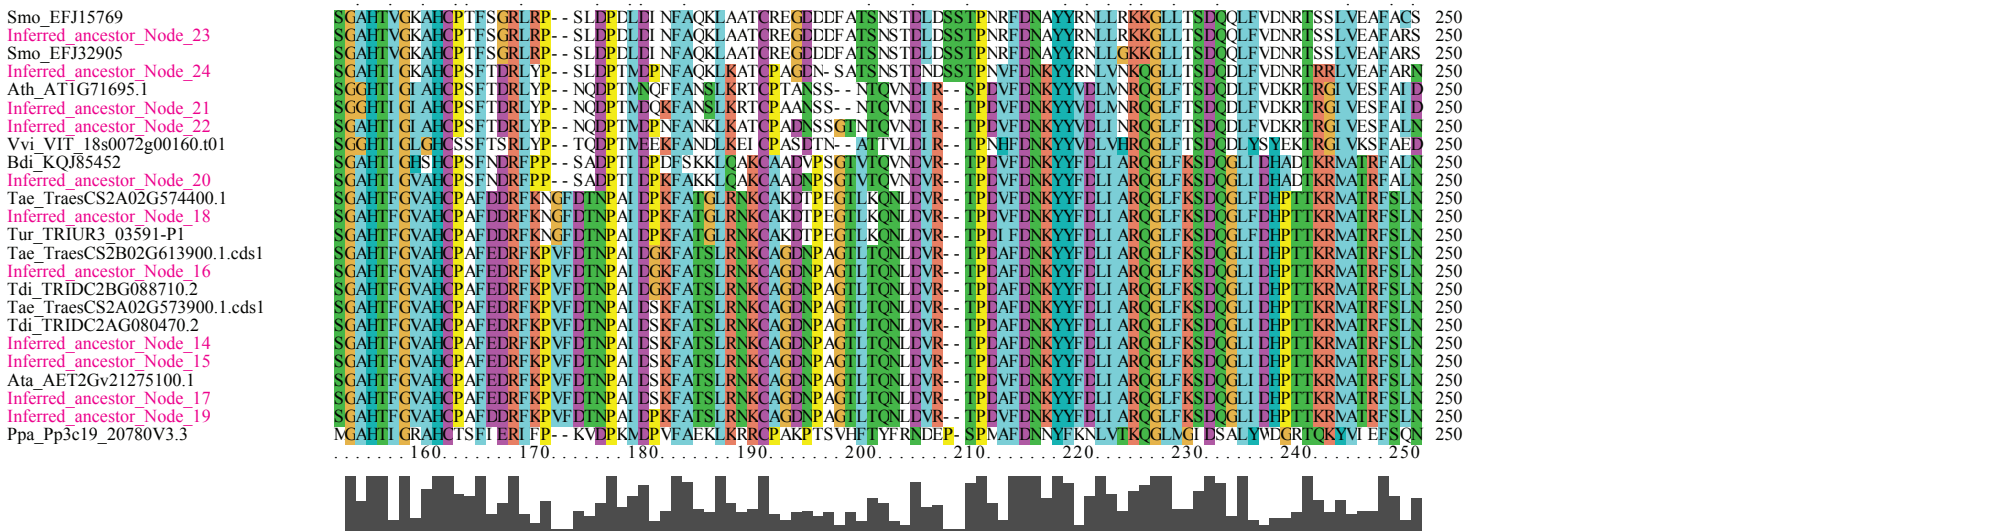

Supplement: 12870_2020_2602_MOESM7_ESM.pdf [file 12870_2020_2602_MOESM7_ESM.pdf]
