# Supplementary material for: A member of wheat class III peroxidase gene family, TaPRX-2A, enhanced the tolerance of salt stress
Source: PubMed Central journal article supplement (PMC7449071; doi:10.1186/s12870-020-02602-1), 2020-08-26
Supplement: 12870_2020_2602_MOESM9_ESM.pdf [file 12870_2020_2602_MOESM9_ESM.pdf]

# cNLS Mapper Result

## Predicted NLSs in query sequence

|                                                     |     |
|-----------------------------------------------------|-----|
| MASRAAAAIAVLALVCAAVHSSEGQLSPNFHAATCPDLEHIVEFHVAETF  | 50  |
| RRDVGVPALIRILFHDCFPQGCDASVLLKGAGSELNEVPNQTLRPVALD   | 100 |
| LIERIRAAVHSACGPTVSCADITVLATRDSLVEAGGPRFDVSLGRRDALA  | 150 |
| PASSALVGLLPAPFFDVPTLISSFSNRSLDVADLVSLSGAHTFGVAHCPA  | 200 |
| FEDRFKPVFDTNPAIDSKFATSLRNKCAGDNPAGTLTQNLDV RTPDAFDN | 250 |
| KYYFDLIARQGLFKSDQGLIDHPTTKRMATRFSLNQGAFFEQFARSMTKM  | 300 |
| SNMDLLTG NKGEIRNNCAAPNRRVQDIETATTGDEGIAADM          | 341 |

## Predicted monopartite NLS

| Pos. | Sequence | Score |
|------|----------|-------|
|      |          |       |

## Predicted bipartite NLS

| Pos. | Sequence                          | Score |
|------|-----------------------------------|-------|
| 221  | TSLRNKCAGDNPAGTLTQNLDV RTPDAFDNK  | 2.1   |
| 271  | DHPTTKRMATRFSLNQGAFFEQFARSMTKMS   | 2.1   |
| 271  | DHPTTKRMATRFSLNQGAFFEQFARSMTKMSN  | 5     |
| 274  | TKRMATRFSLNQGAFFEQFARSMTKMSNMD    | 2.9   |
| 295  | RSMTKMSNMDLLTG NKGEIRNNCAAPNRRVQD | 2.1   |
